# Supplementary material for: The burden of antimicrobial resistance in the Americas in 2019: a cross-country systematic analysis
Source: PubMed Central journal article supplement — Lancet Reg Health Am. 2023 Aug 8;25:100561. doi: 10.1016/j.lana.2023.100561 (PMC10505822; doi:10.1016/j.lana.2023.100561), 2023-08-08

DEATHS

# Andean Latin America

Deaths (count) associated with bacterial antimicrobial resistance by pathogen–drug combinations, 2019

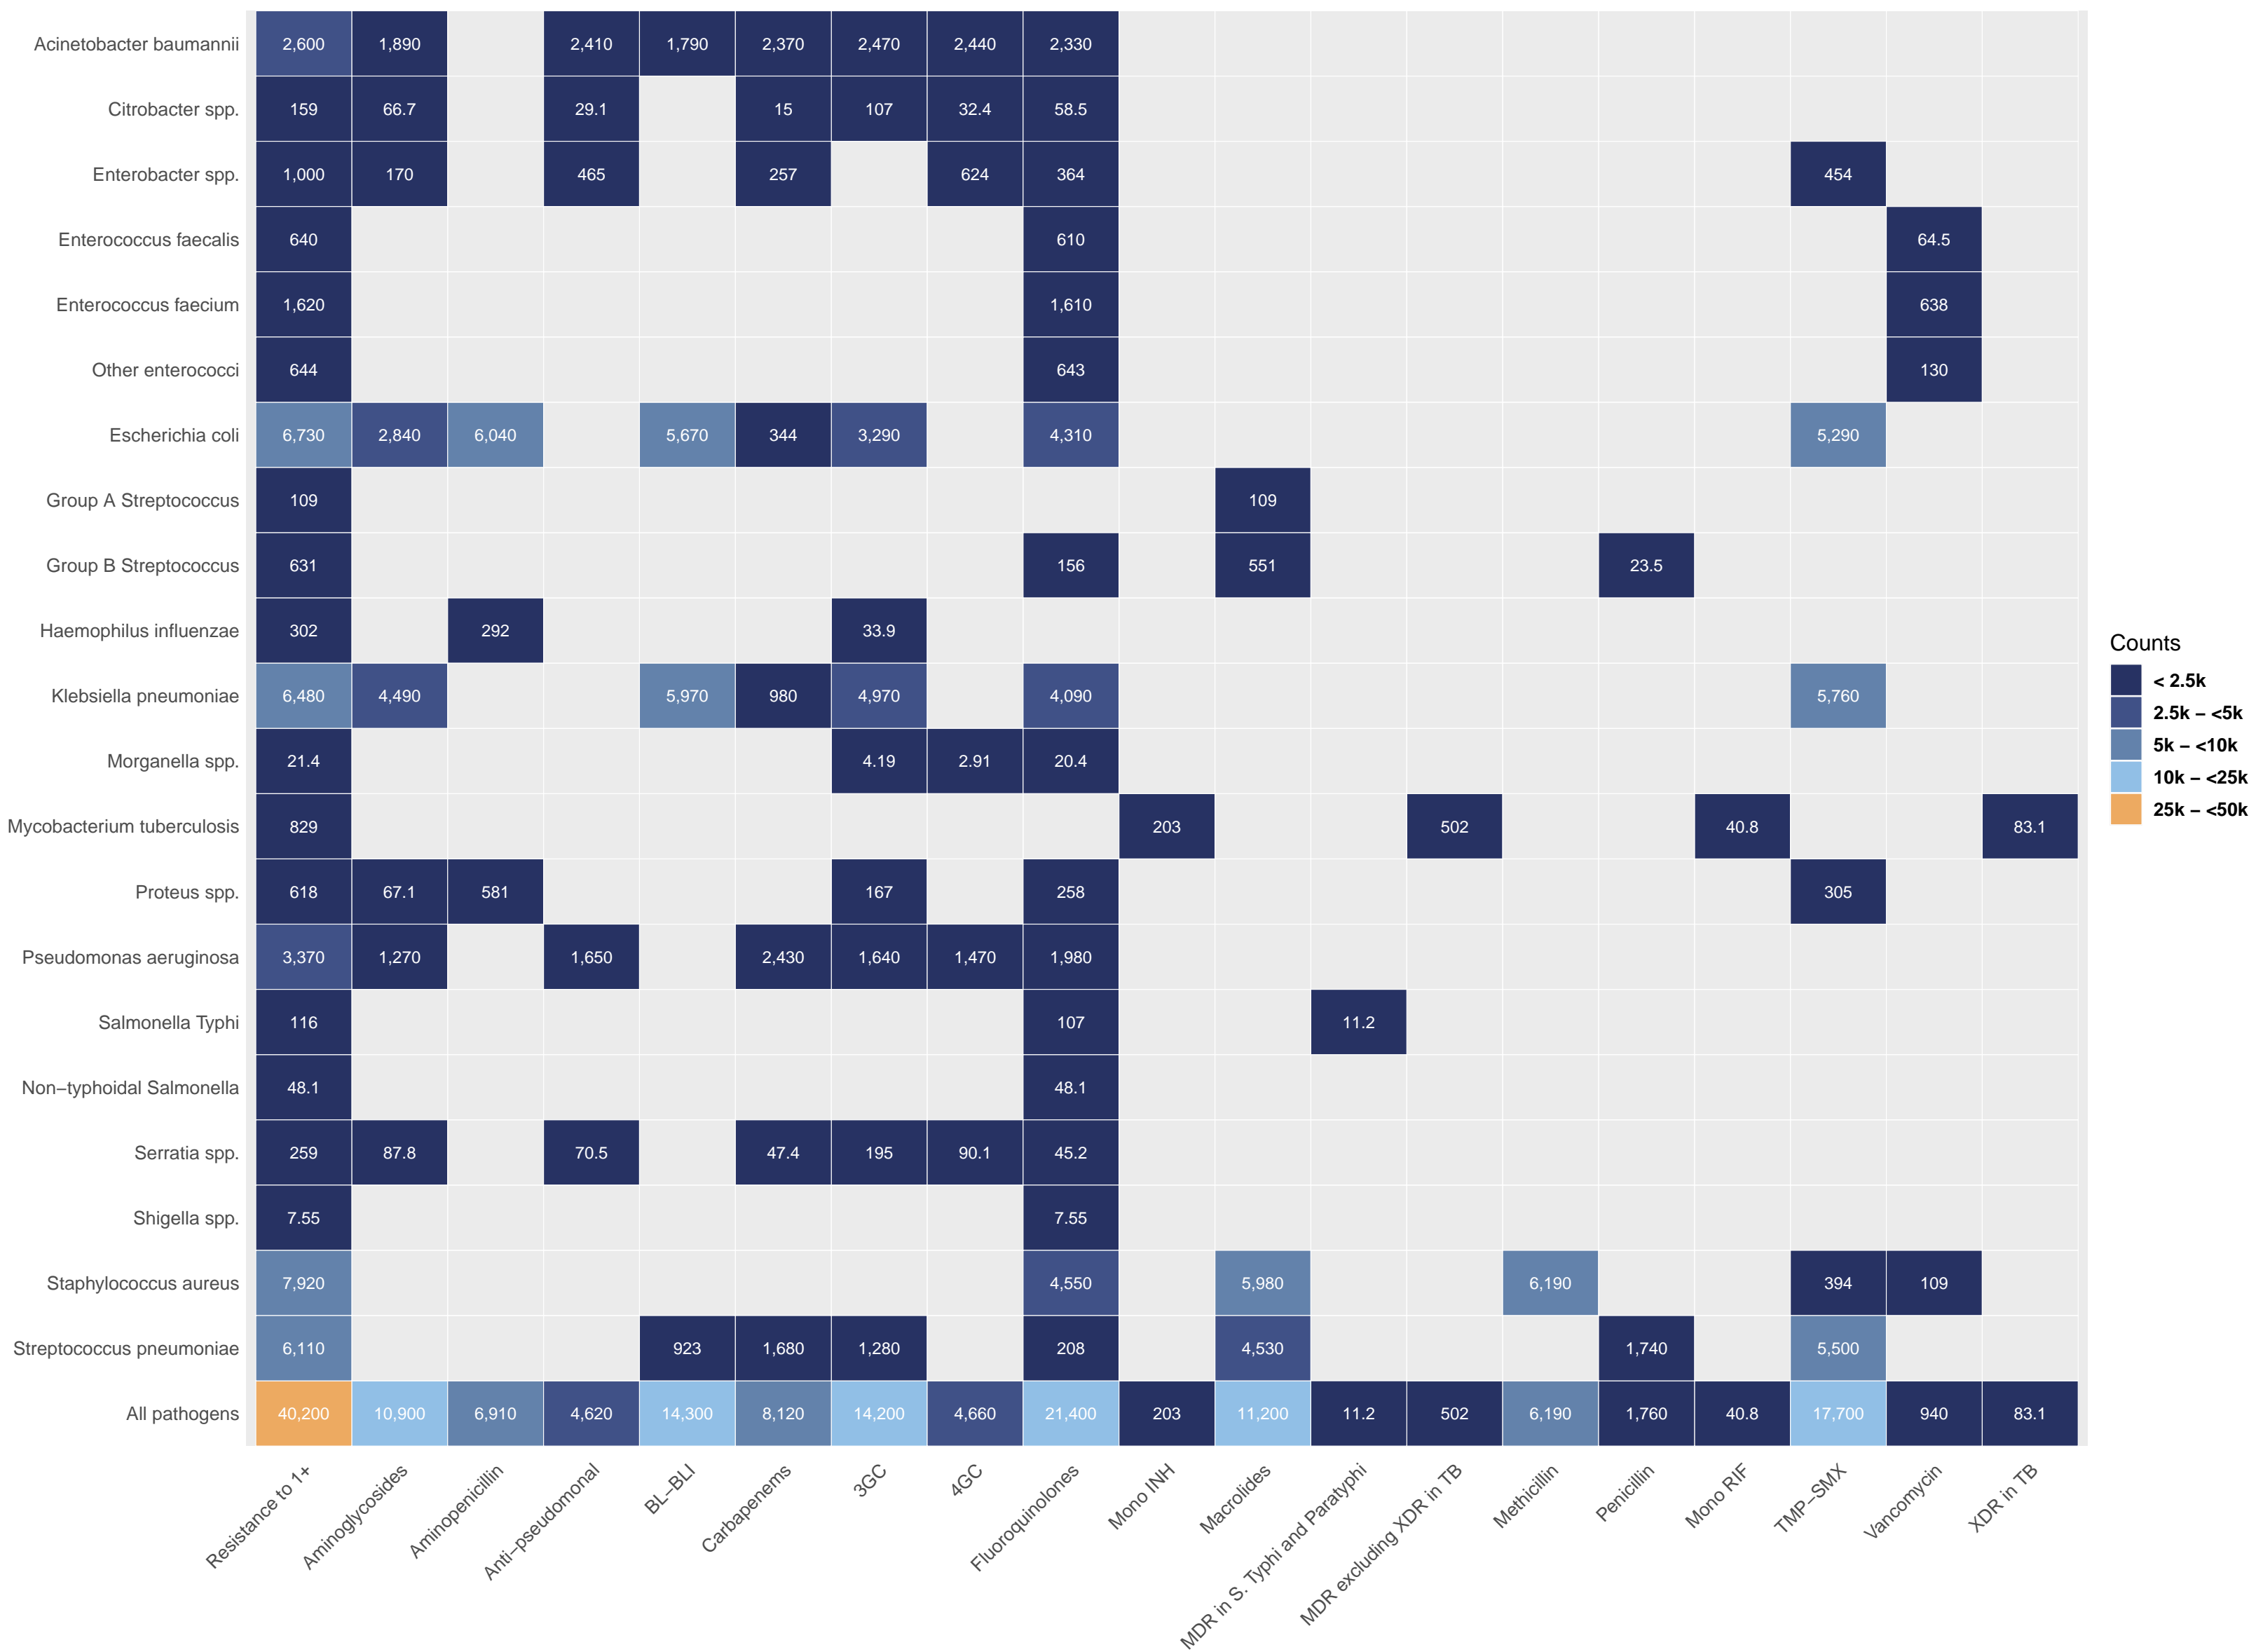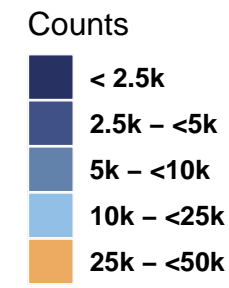

# Andean Latin America

Deaths (count) *attributable to* bacterial antimicrobial resistance by pathogen–drug combinations, 2019

|                            |                  |                 |                 |                  |        |             |       |       |                  |          |            |                               |                         |             |            |          |         |            |           |
|----------------------------|------------------|-----------------|-----------------|------------------|--------|-------------|-------|-------|------------------|----------|------------|-------------------------------|-------------------------|-------------|------------|----------|---------|------------|-----------|
| Acinetobacter baumannii    | 834              | 79.7            |                 | 29.3             | 0.074  | 404         | 19.4  | 9.36  | 291              |          |            |                               |                         |             |            |          |         |            |           |
| Citrobacter spp.           | 41.7             | 4.56            |                 | 6.28             |        | 3.58        | 14.9  | 3.13  | 9.24             |          |            |                               |                         |             |            |          |         |            |           |
| Enterobacter spp.          | 240              | 10.3            |                 | 53.8             |        | 65.4        |       | 42.6  | 41.5             |          |            |                               |                         |             |            |          | 26.2    |            |           |
| Enterococcus faecalis      | 173              |                 |                 |                  |        |             |       |       | 152              |          |            |                               |                         |             |            |          |         | 20.6       |           |
| Enterococcus faecium       | 439              |                 |                 |                  |        |             |       |       | 292              |          |            |                               |                         |             |            |          |         | 147        |           |
| Other enterococci          | 139              |                 |                 |                  |        |             |       |       | 118              |          |            |                               |                         |             |            |          |         | 21.6       |           |
| Escherichia coli           | 1,640            | 168             | 39.9            |                  | 238    | 73.3        | 398   |       | 427              |          |            |                               |                         |             |            |          | 300     |            |           |
| Group A Streptococcus      | 10.5             |                 |                 |                  |        |             |       |       |                  |          | 10.5       |                               |                         |             |            |          |         |            |           |
| Group B Streptococcus      | 87.5             |                 |                 |                  |        |             |       |       | 26.8             |          | 55.8       |                               |                         | 4.89        |            |          |         |            |           |
| Haemophilus influenzae     | 59.6             |                 | 49.6            |                  |        |             | 10    |       |                  |          |            |                               |                         |             |            |          |         |            |           |
| Klebsiella pneumoniae      | 1,760            | 332             |                 |                  | 111    | 231         | 570   |       | 253              |          |            |                               |                         |             |            |          | 262     |            |           |
| Morganella spp.            | 4.8              |                 |                 |                  |        |             | 0.501 | 0.462 | 3.83             |          |            |                               |                         |             |            |          |         |            |           |
| Mycobacterium tuberculosis | 392              |                 |                 |                  |        |             |       |       |                  | 32.2     |            |                               | 297                     |             |            | 11.4     |         |            | 50.9      |
| Proteus spp.               | 83.2             | 3.41            | 12.6            |                  |        |             | 37.4  |       | 18.7             |          |            |                               |                         |             |            |          |         | 11         |           |
| Pseudomonas aeruginosa     | 822              | 31.6            |                 | 82.1             |        | 427         | 49.9  | 23.4  | 208              |          |            |                               |                         |             |            |          |         |            |           |
| Salmonella Typhi           | 23.4             |                 |                 |                  |        |             |       |       | 22               |          |            | 1.4                           |                         |             |            |          |         |            |           |
| Non-typhoidal Salmonella   | 10               |                 |                 |                  |        |             |       |       | 10               |          |            |                               |                         |             |            |          |         |            |           |
| Serratia spp.              | 66.3             | 5.39            |                 | 15.1             |        | 12.8        | 19.5  | 8.81  | 4.77             |          |            |                               |                         |             |            |          |         |            |           |
| Shigella spp.              | 1.58             |                 |                 |                  |        |             |       |       | 1.58             |          |            |                               |                         |             |            |          |         |            |           |
| Staphylococcus aureus      | 2,120            |                 |                 |                  |        |             |       |       | 198              |          | 225        |                               | 1,630                   |             |            |          | 31.2    | 29.6       |           |
| Streptococcus pneumoniae   | 1,170            |                 |                 |                  | 13.1   | 362         | 59.4  |       | 22.3             |          | 171        |                               |                         | 68.1        |            |          | 477     |            |           |
| All pathogens              | 10,100           | 635             | 102             | 187              | 362    | 1,580       | 1,180 | 87.8  | 2,100            | 32.2     | 463        | 1.4                           | 297                     | 1,630       | 73         | 11.4     | 1,110   | 219        | 50.9      |
|                            | Resistance to 1+ | Aminoglycosides | Aminopenicillin | Anti-pseudomonal | BL-BLI | Carbapenems | 3GC   | 4GC   | Fluoroquinolones | Mono INH | Macrolides | MDR in S. Typhi and Paratyphi | MDR excluding XDR in TB | Methicillin | Penicillin | Mono RIF | TMP-SMX | Vancomycin | XDR in TB |

Counts  
 < 2.5k  
 10k – <25k

# Caribbean

Deaths (count) associated with bacterial antimicrobial resistance by pathogen–drug combinations, 2019

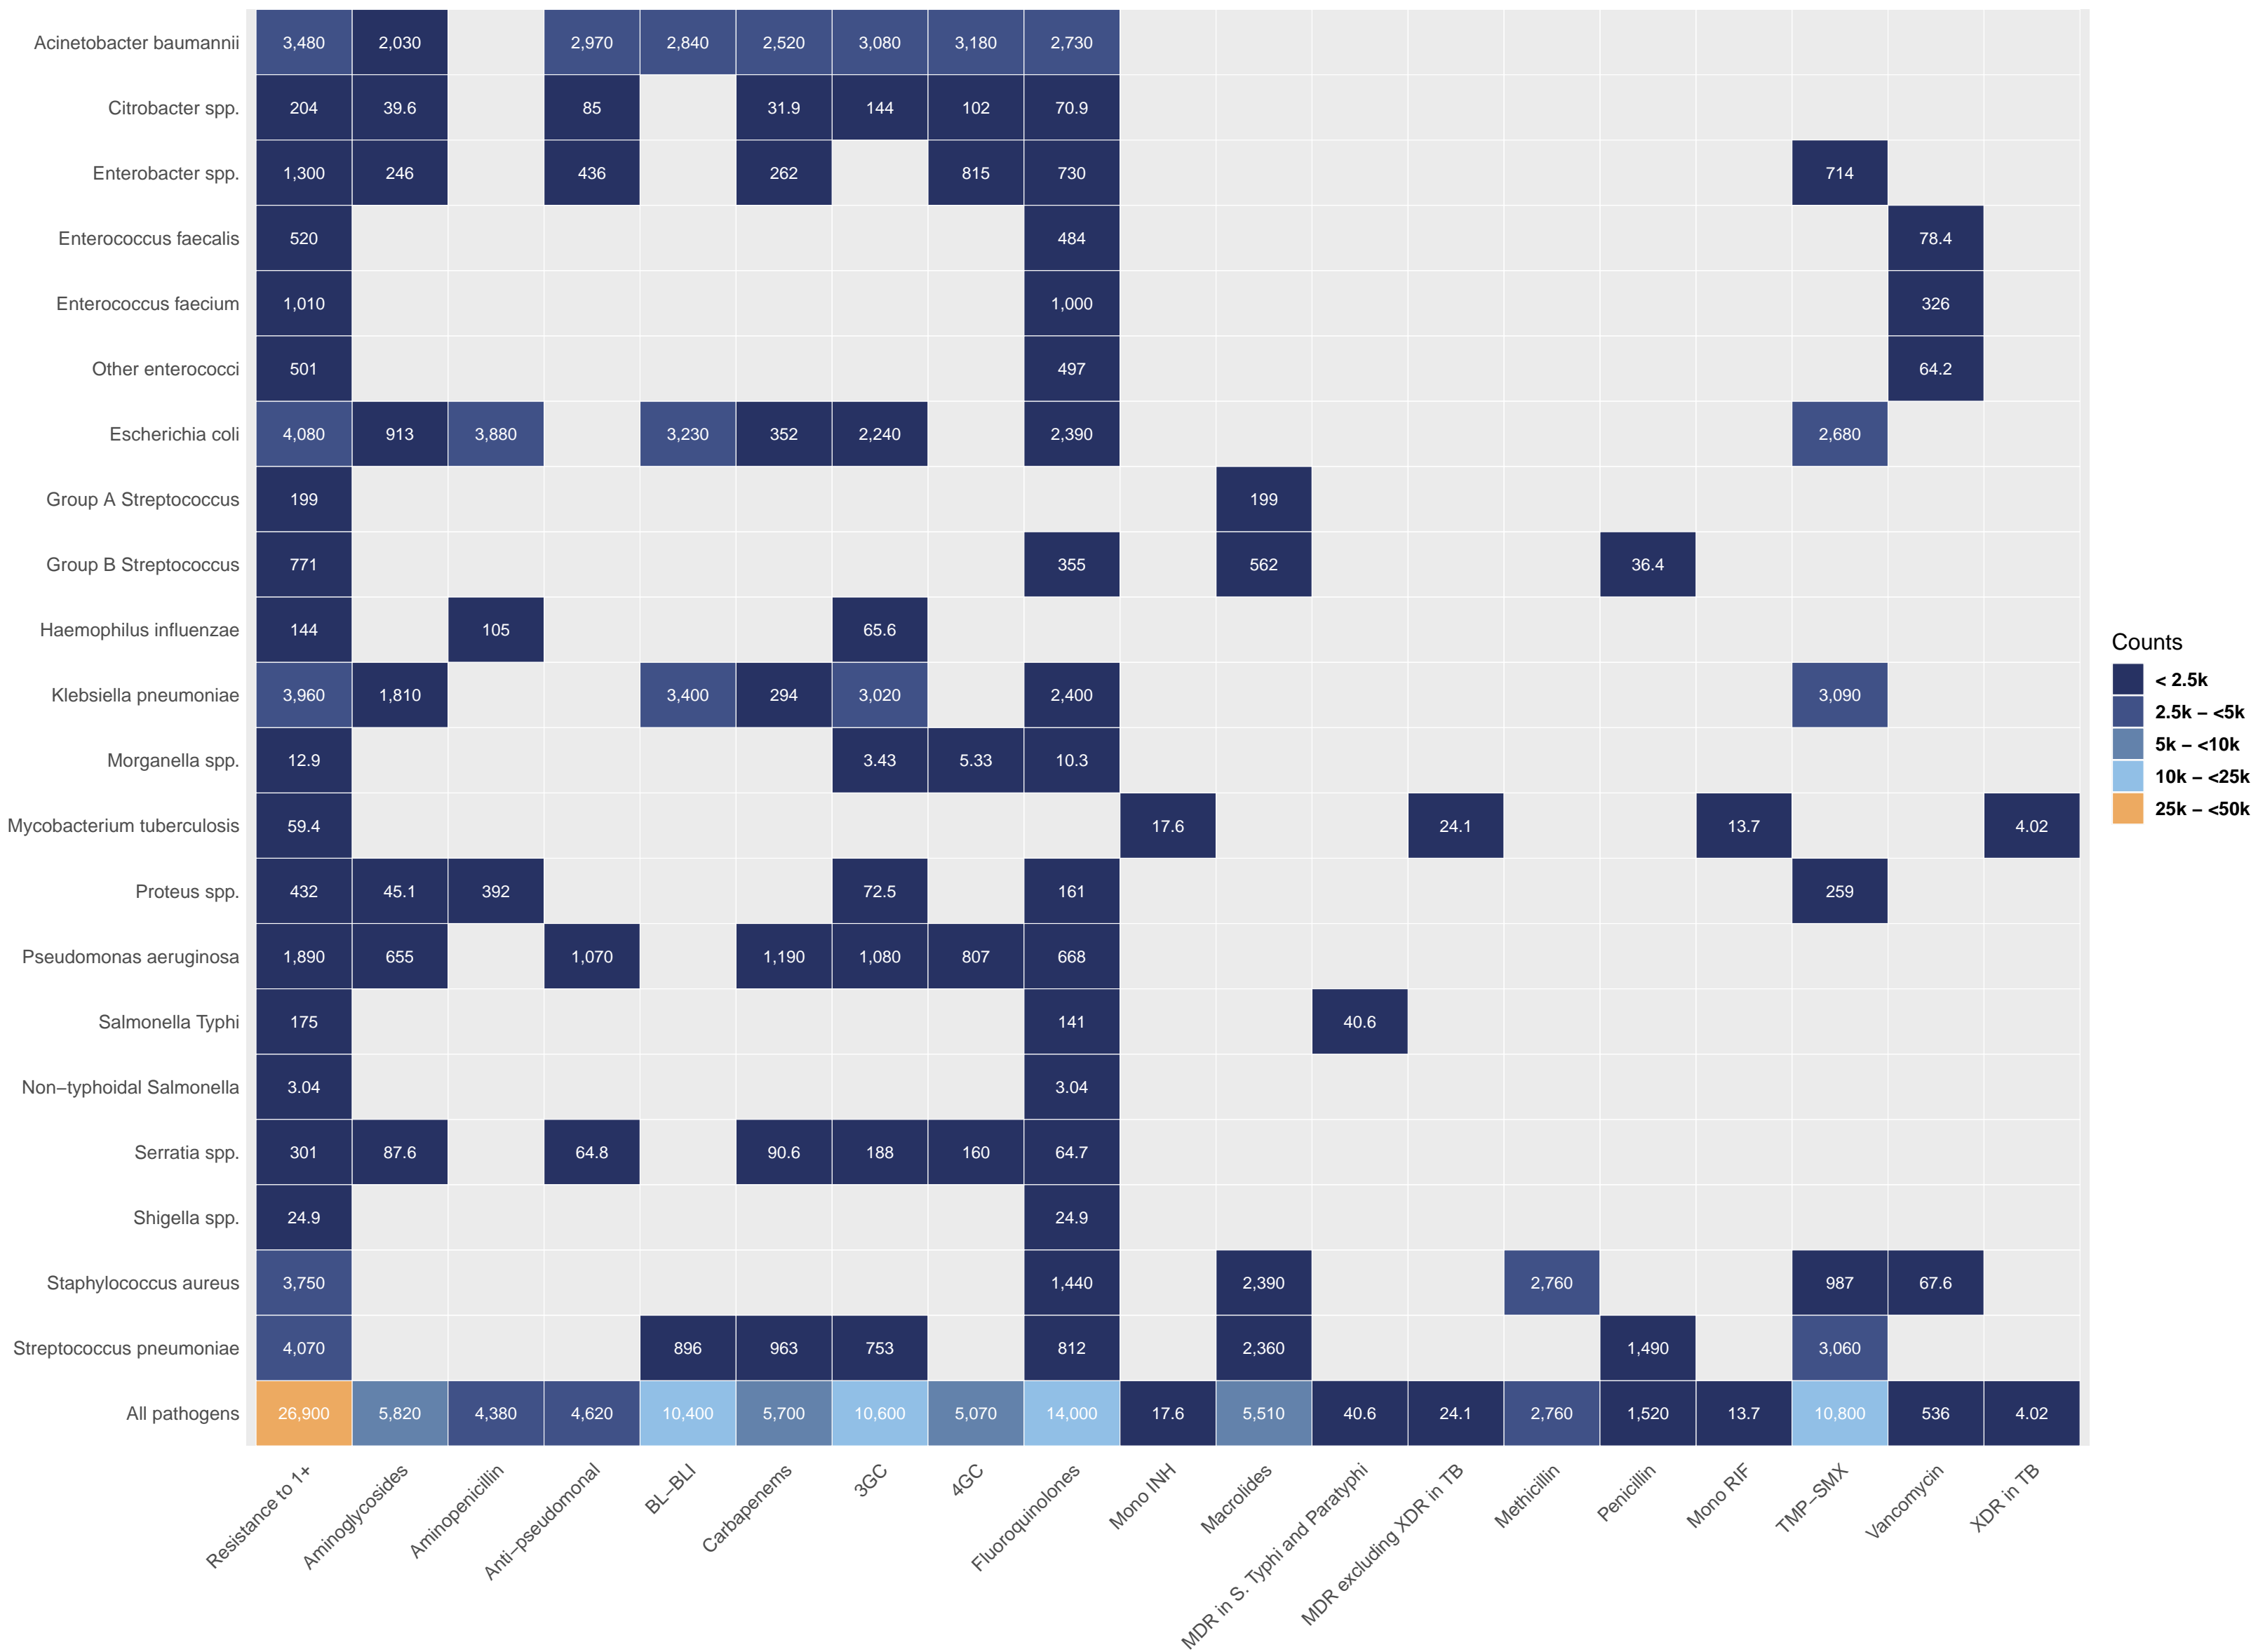

# Caribbean

Deaths (count) *attributable to* bacterial antimicrobial resistance by pathogen–drug combinations, 2019

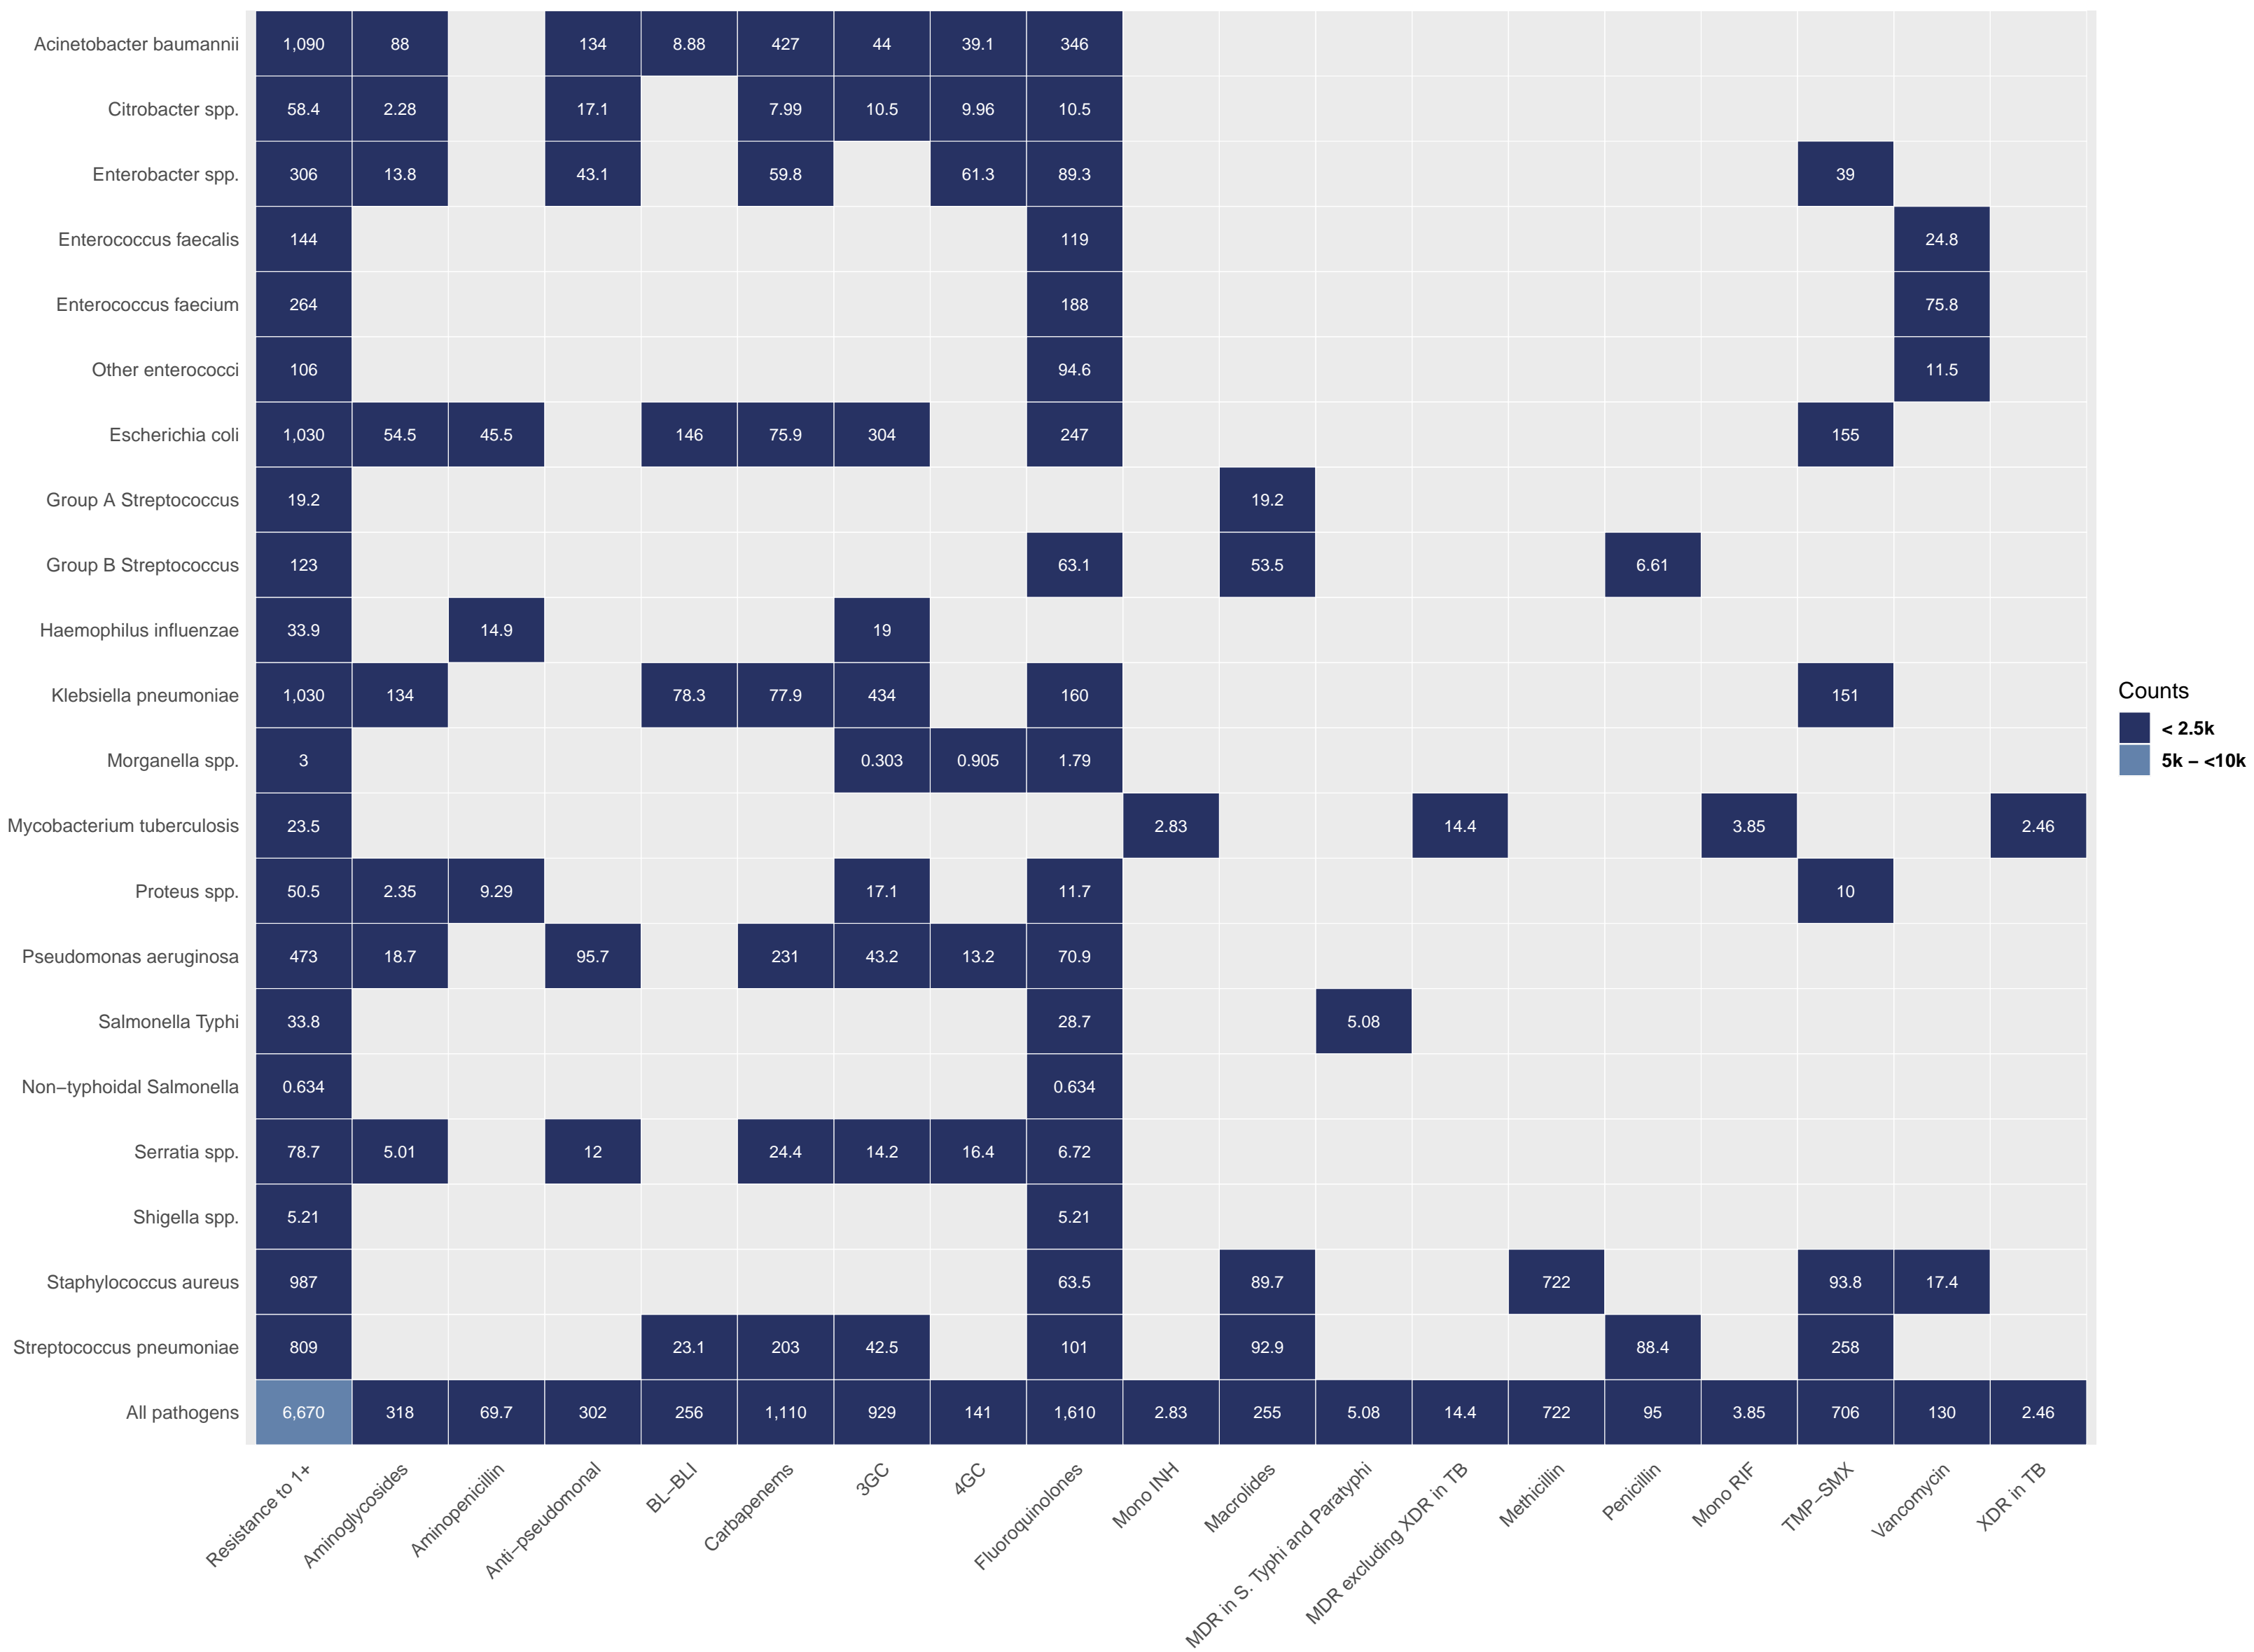

Counts  
 < 2.5k  
 5k – <10k

# Central Latin America

Deaths (count) associated with bacterial antimicrobial resistance by pathogen–drug combinations, 2019

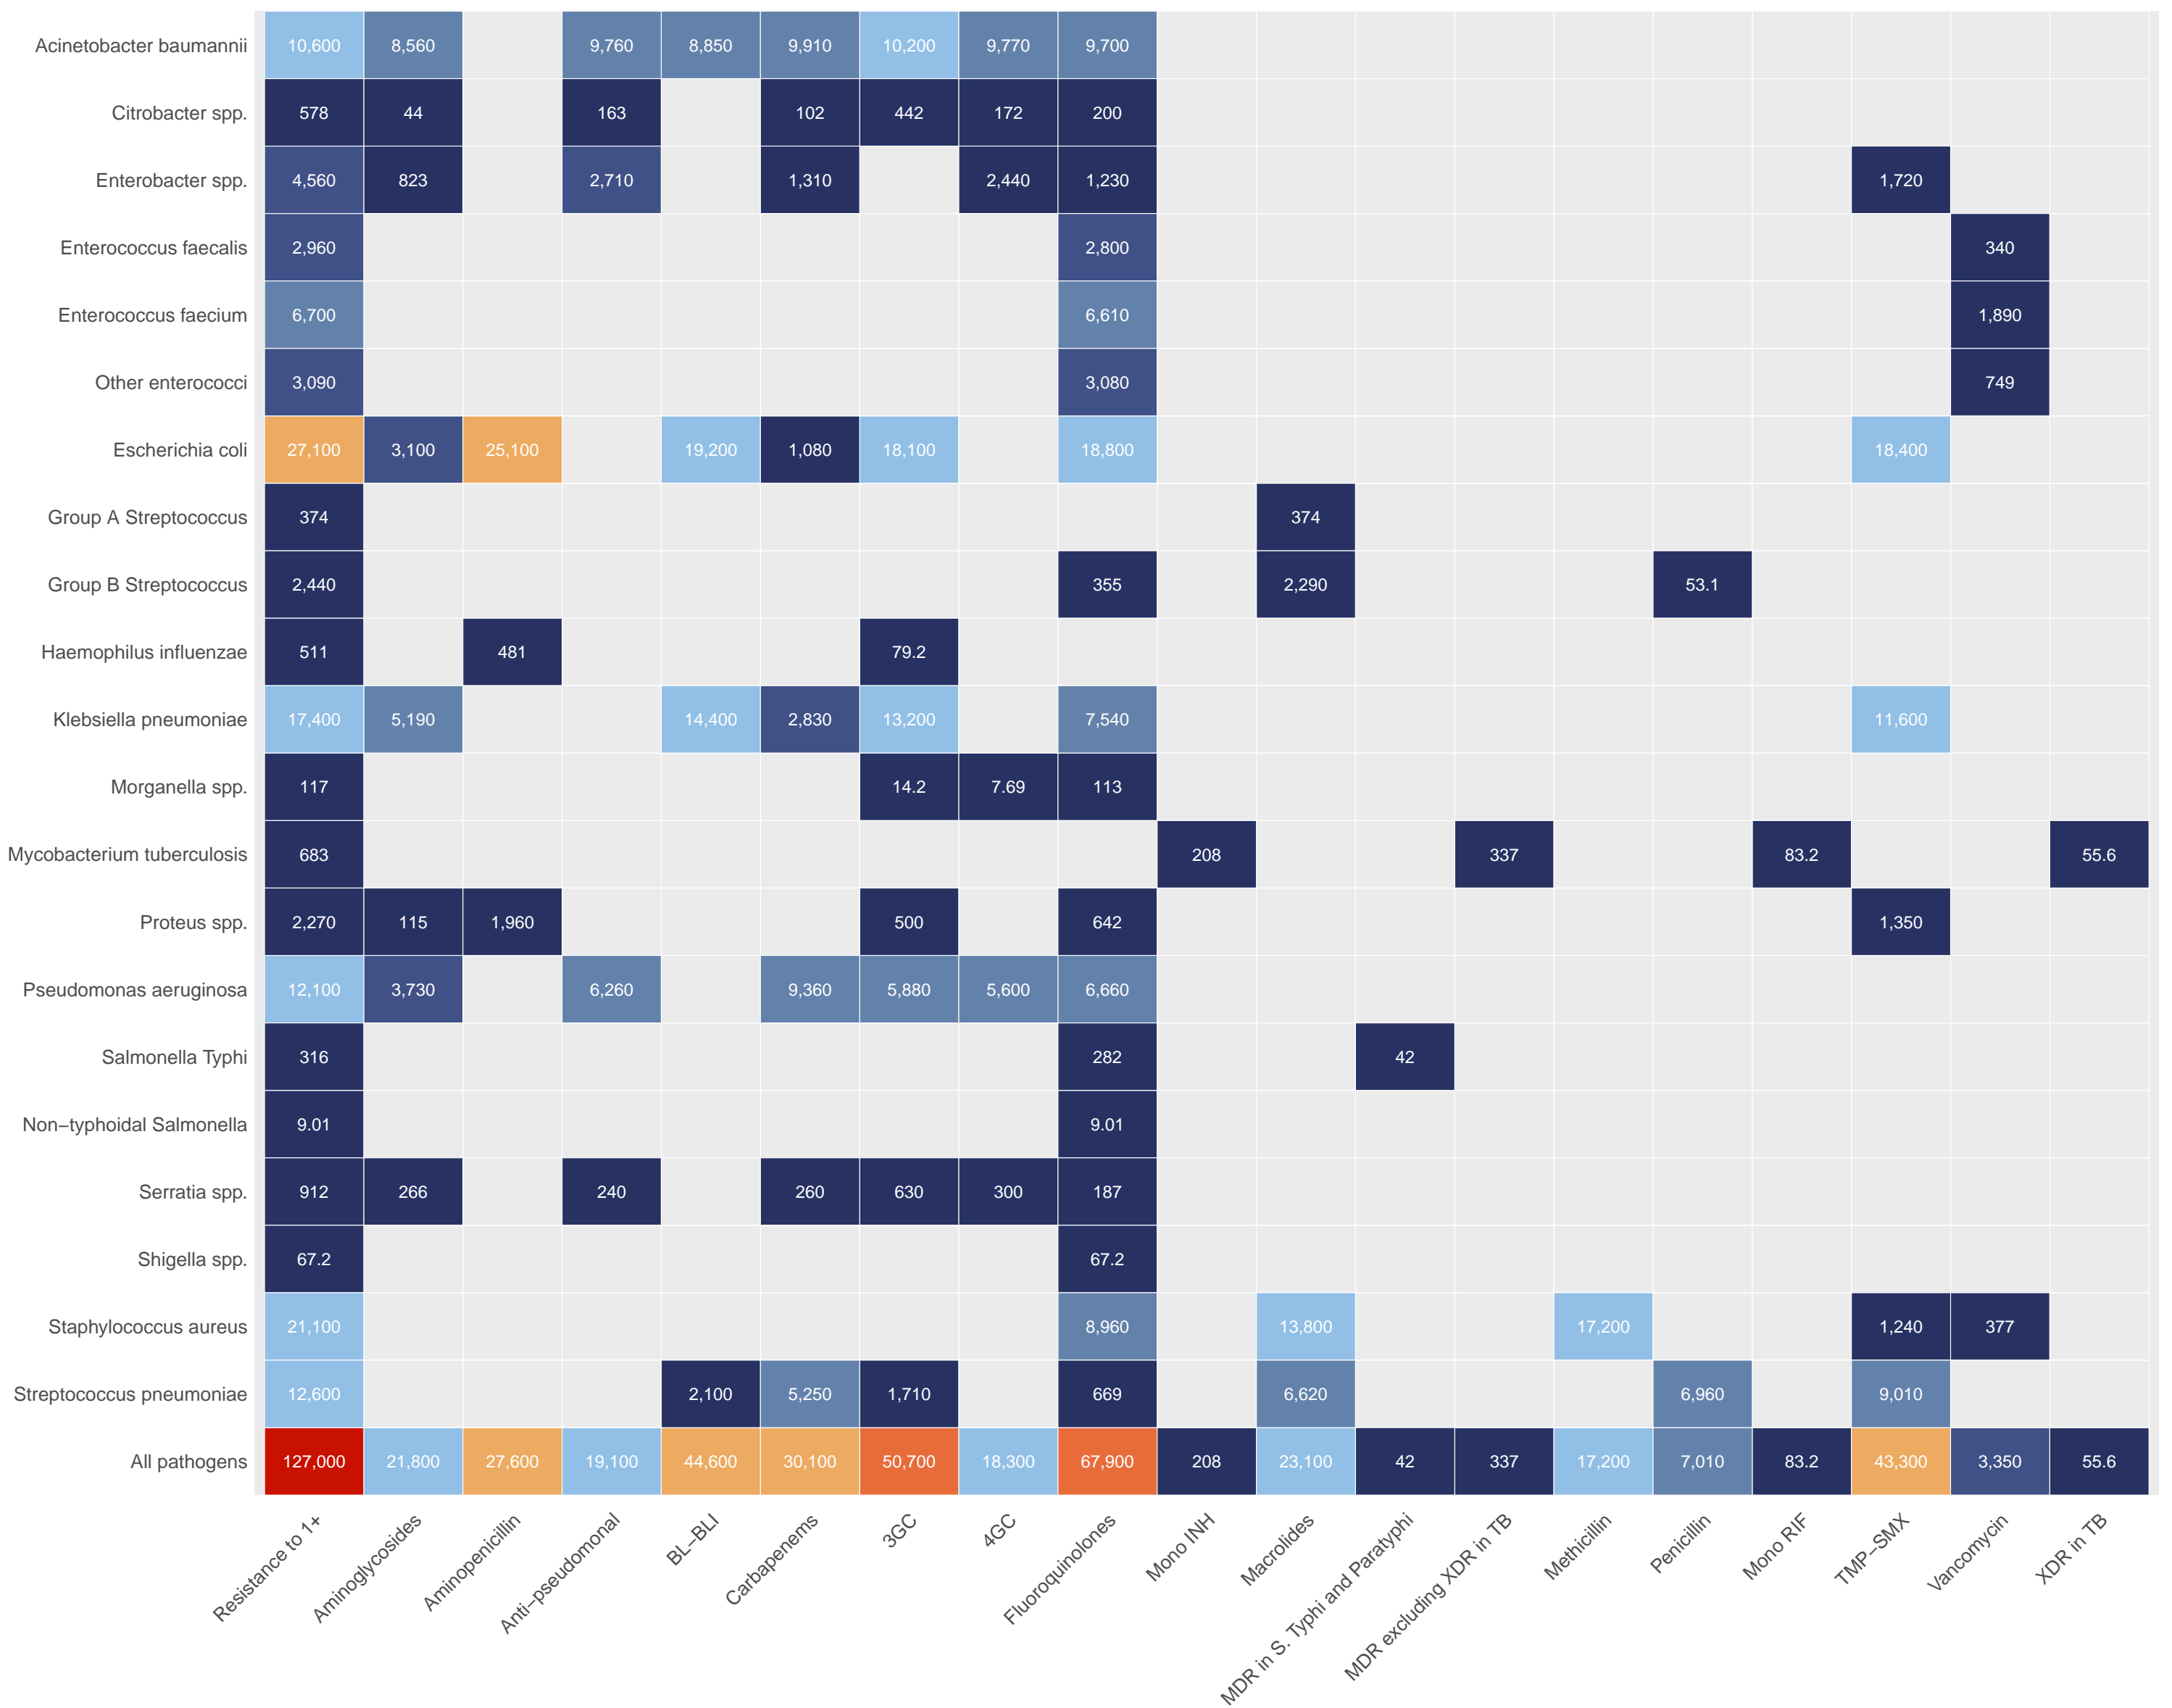

Counts

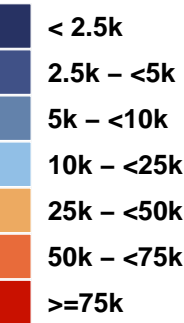

# Central Latin America

Deaths (count) *attributable to* bacterial antimicrobial resistance by pathogen–drug combinations, 2019

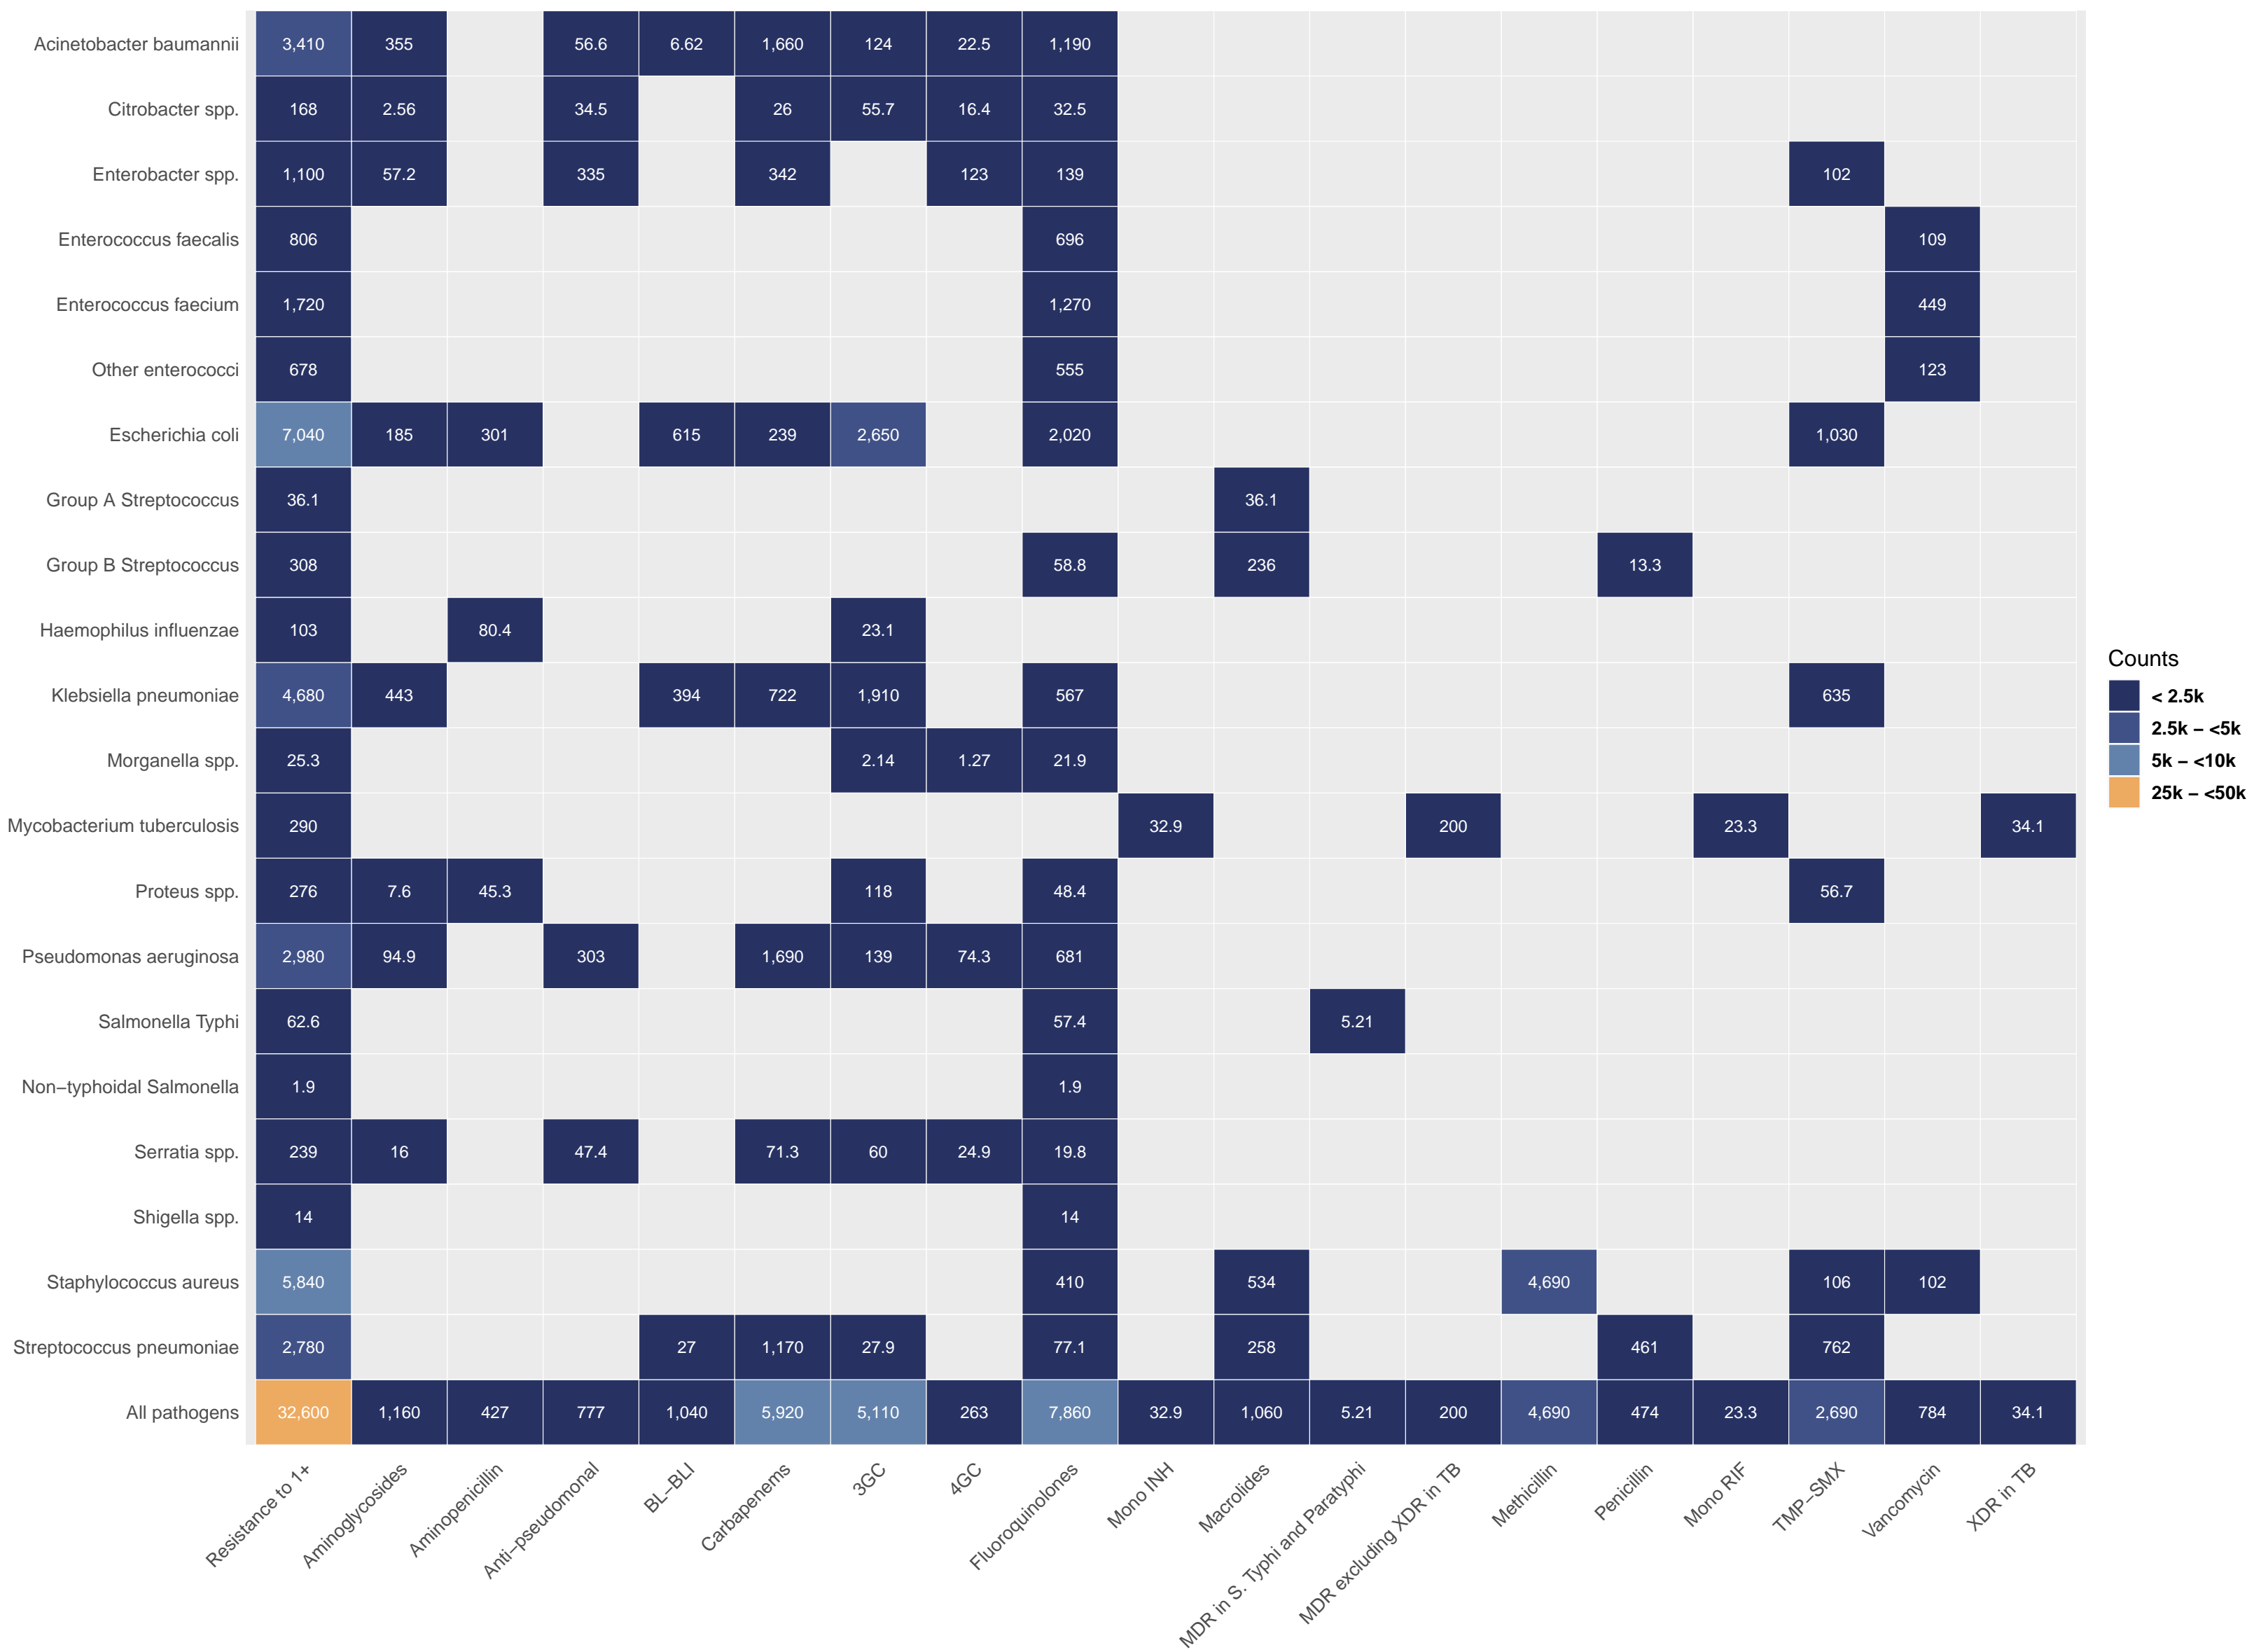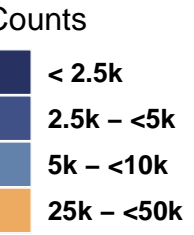

# High-income North America

Deaths (count) associated with bacterial antimicrobial resistance by pathogen-drug combinations, 2019

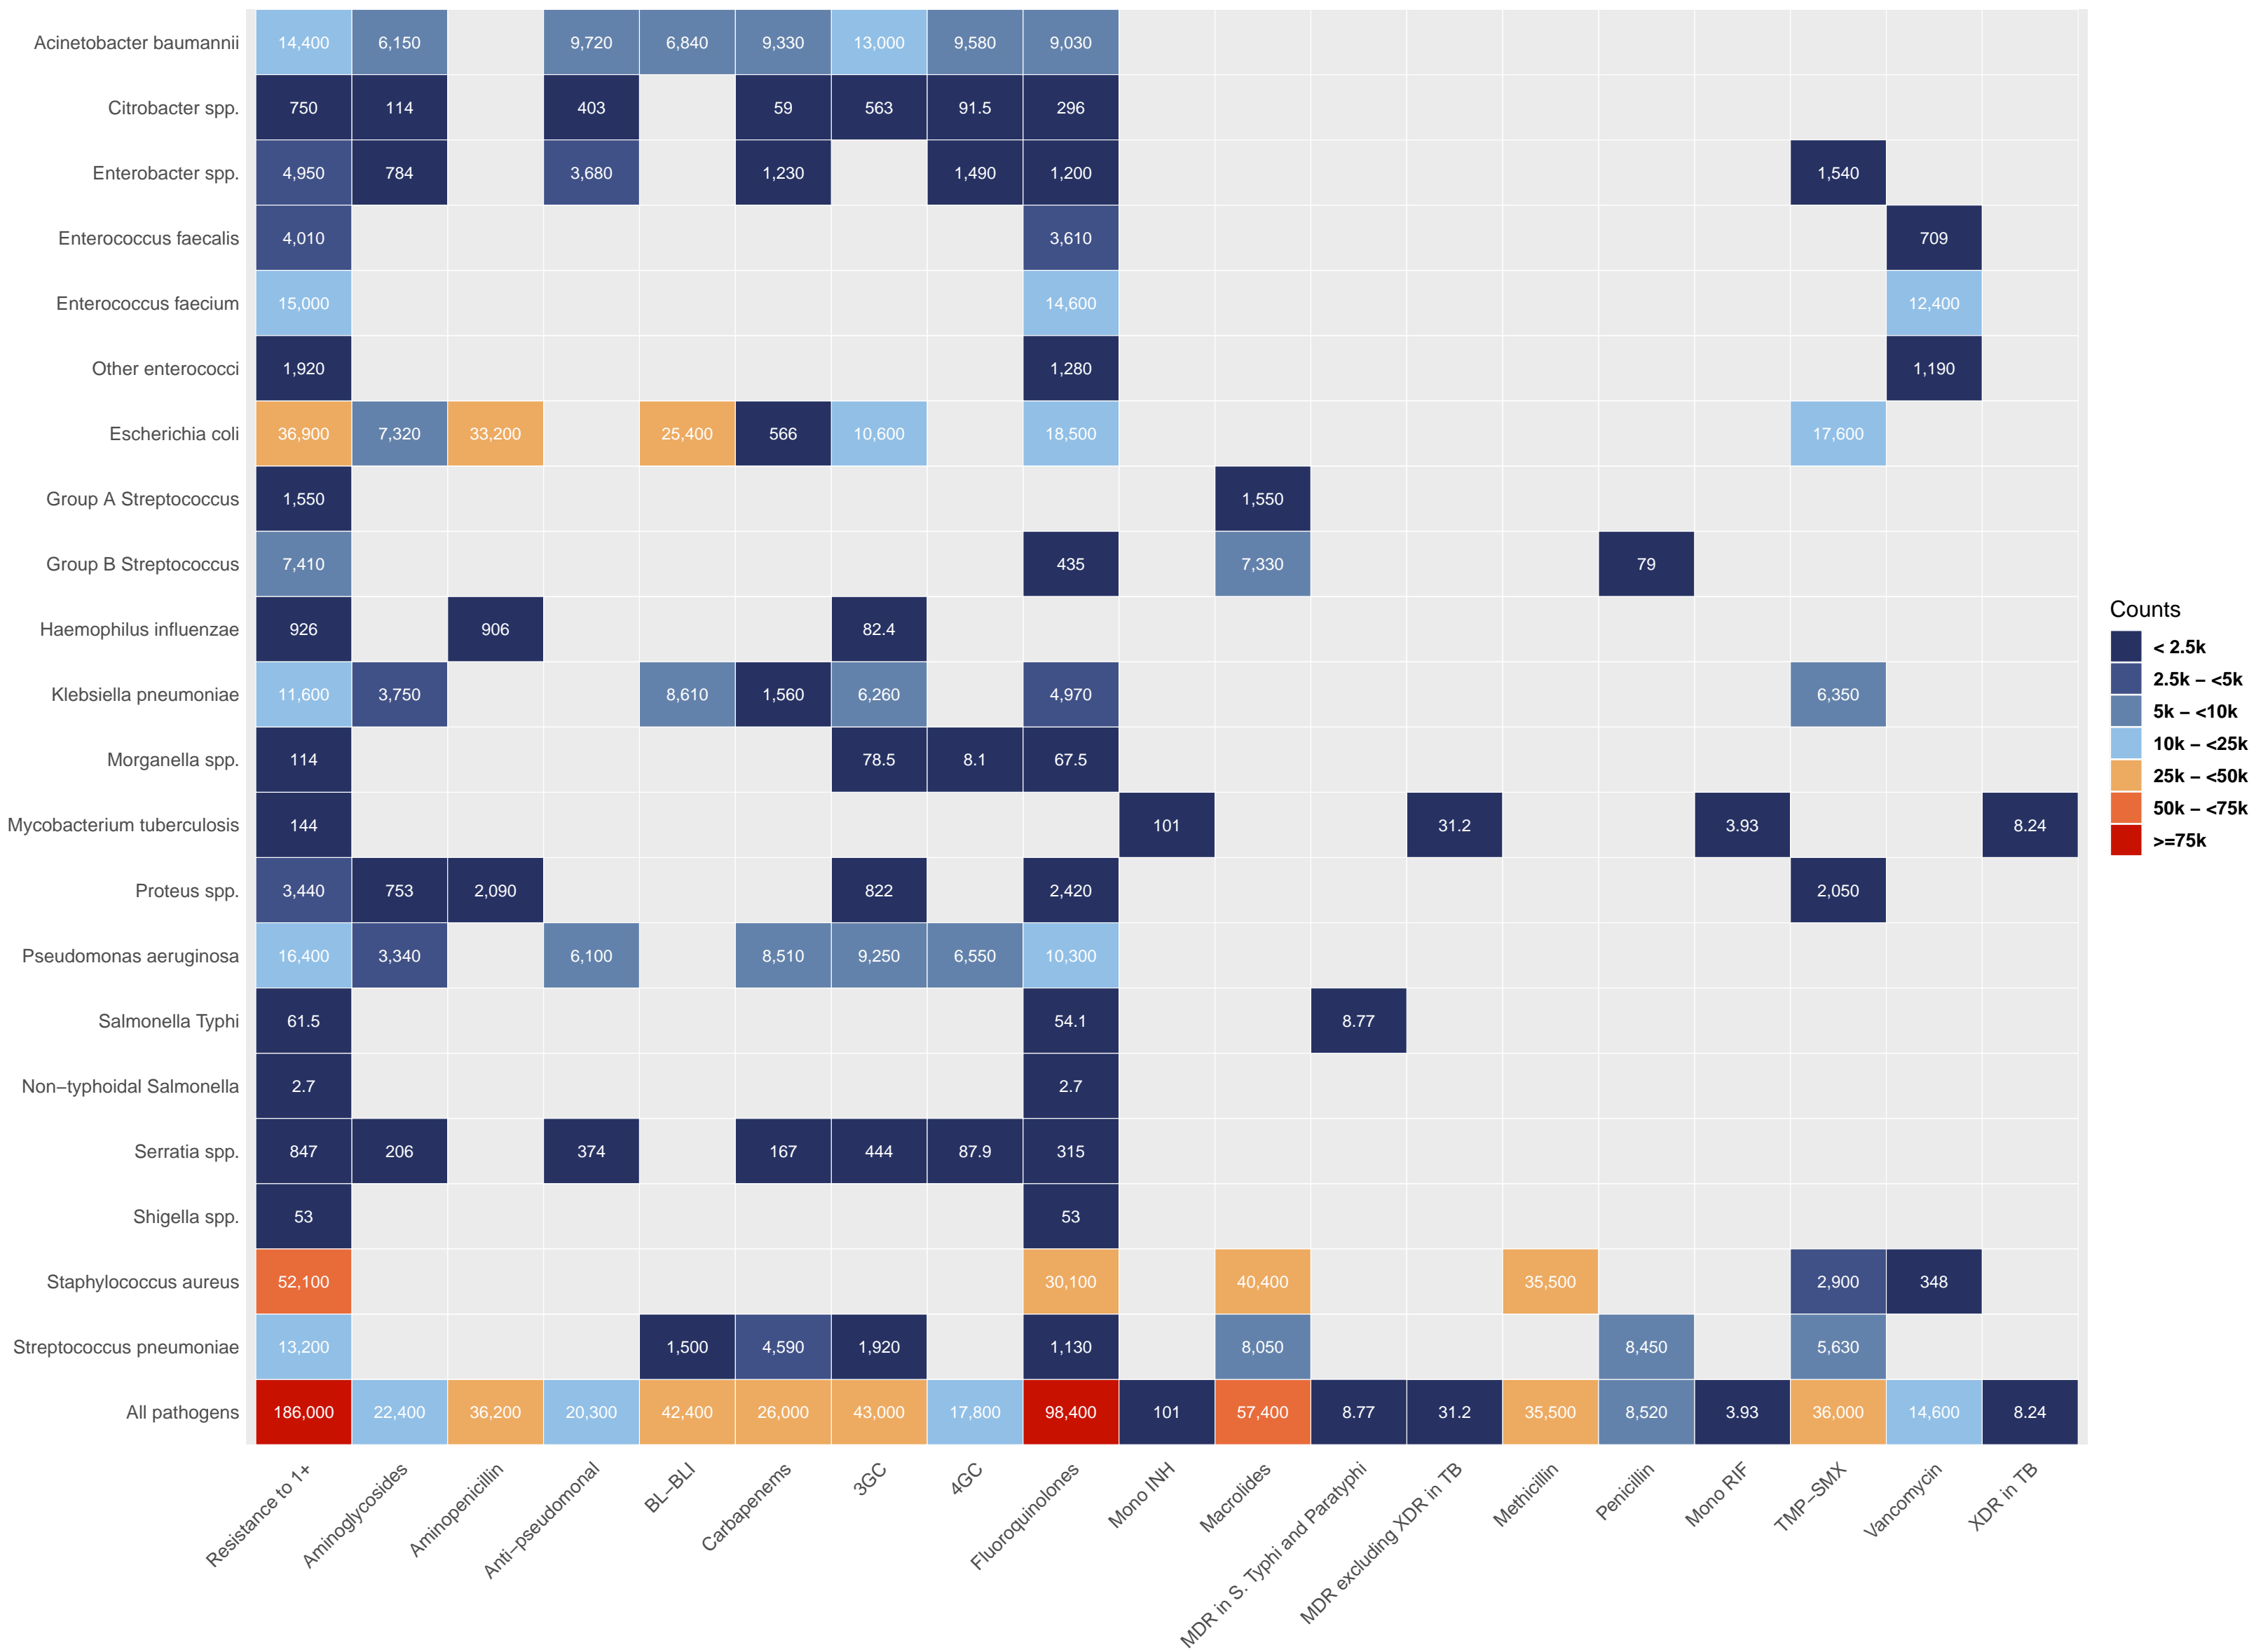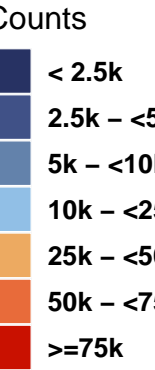



# High-income North America

Deaths (count) *attributable to* bacterial antimicrobial resistance by pathogen-drug combinations, 2019

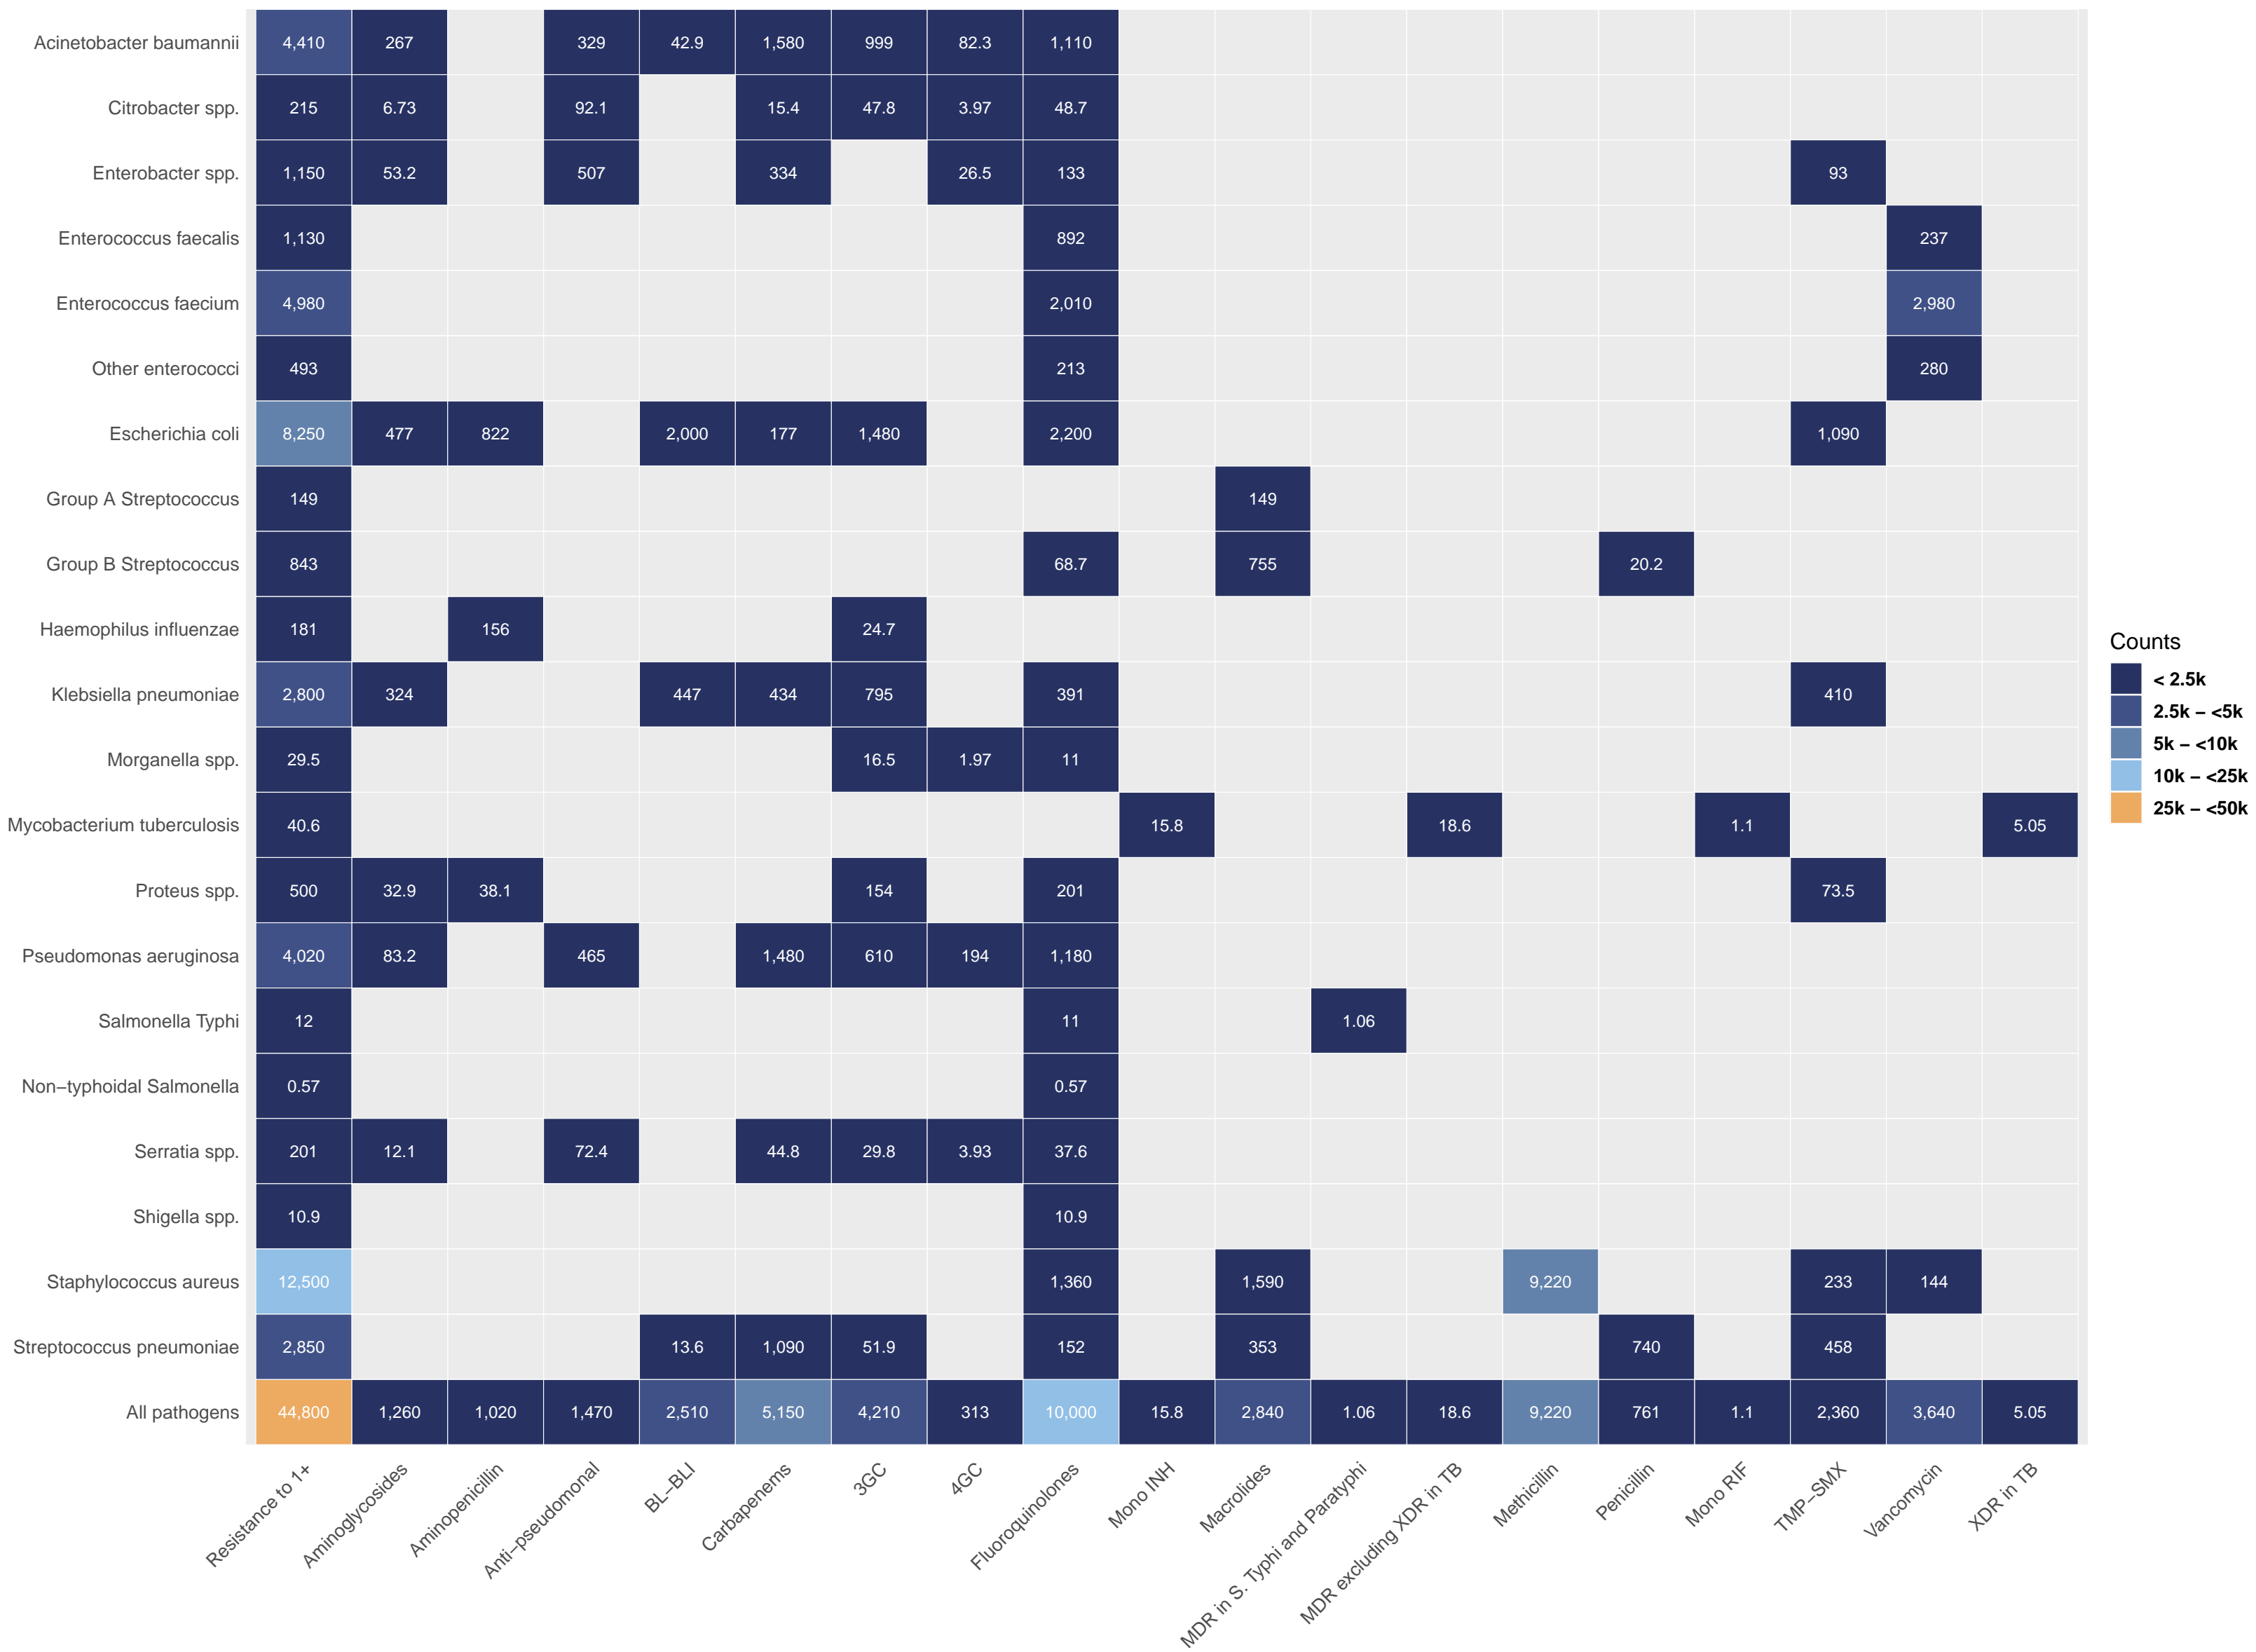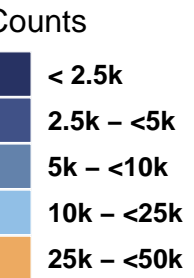

# Southern Latin America

Deaths (count) associated with bacterial antimicrobial resistance by pathogen–drug combinations, 2019

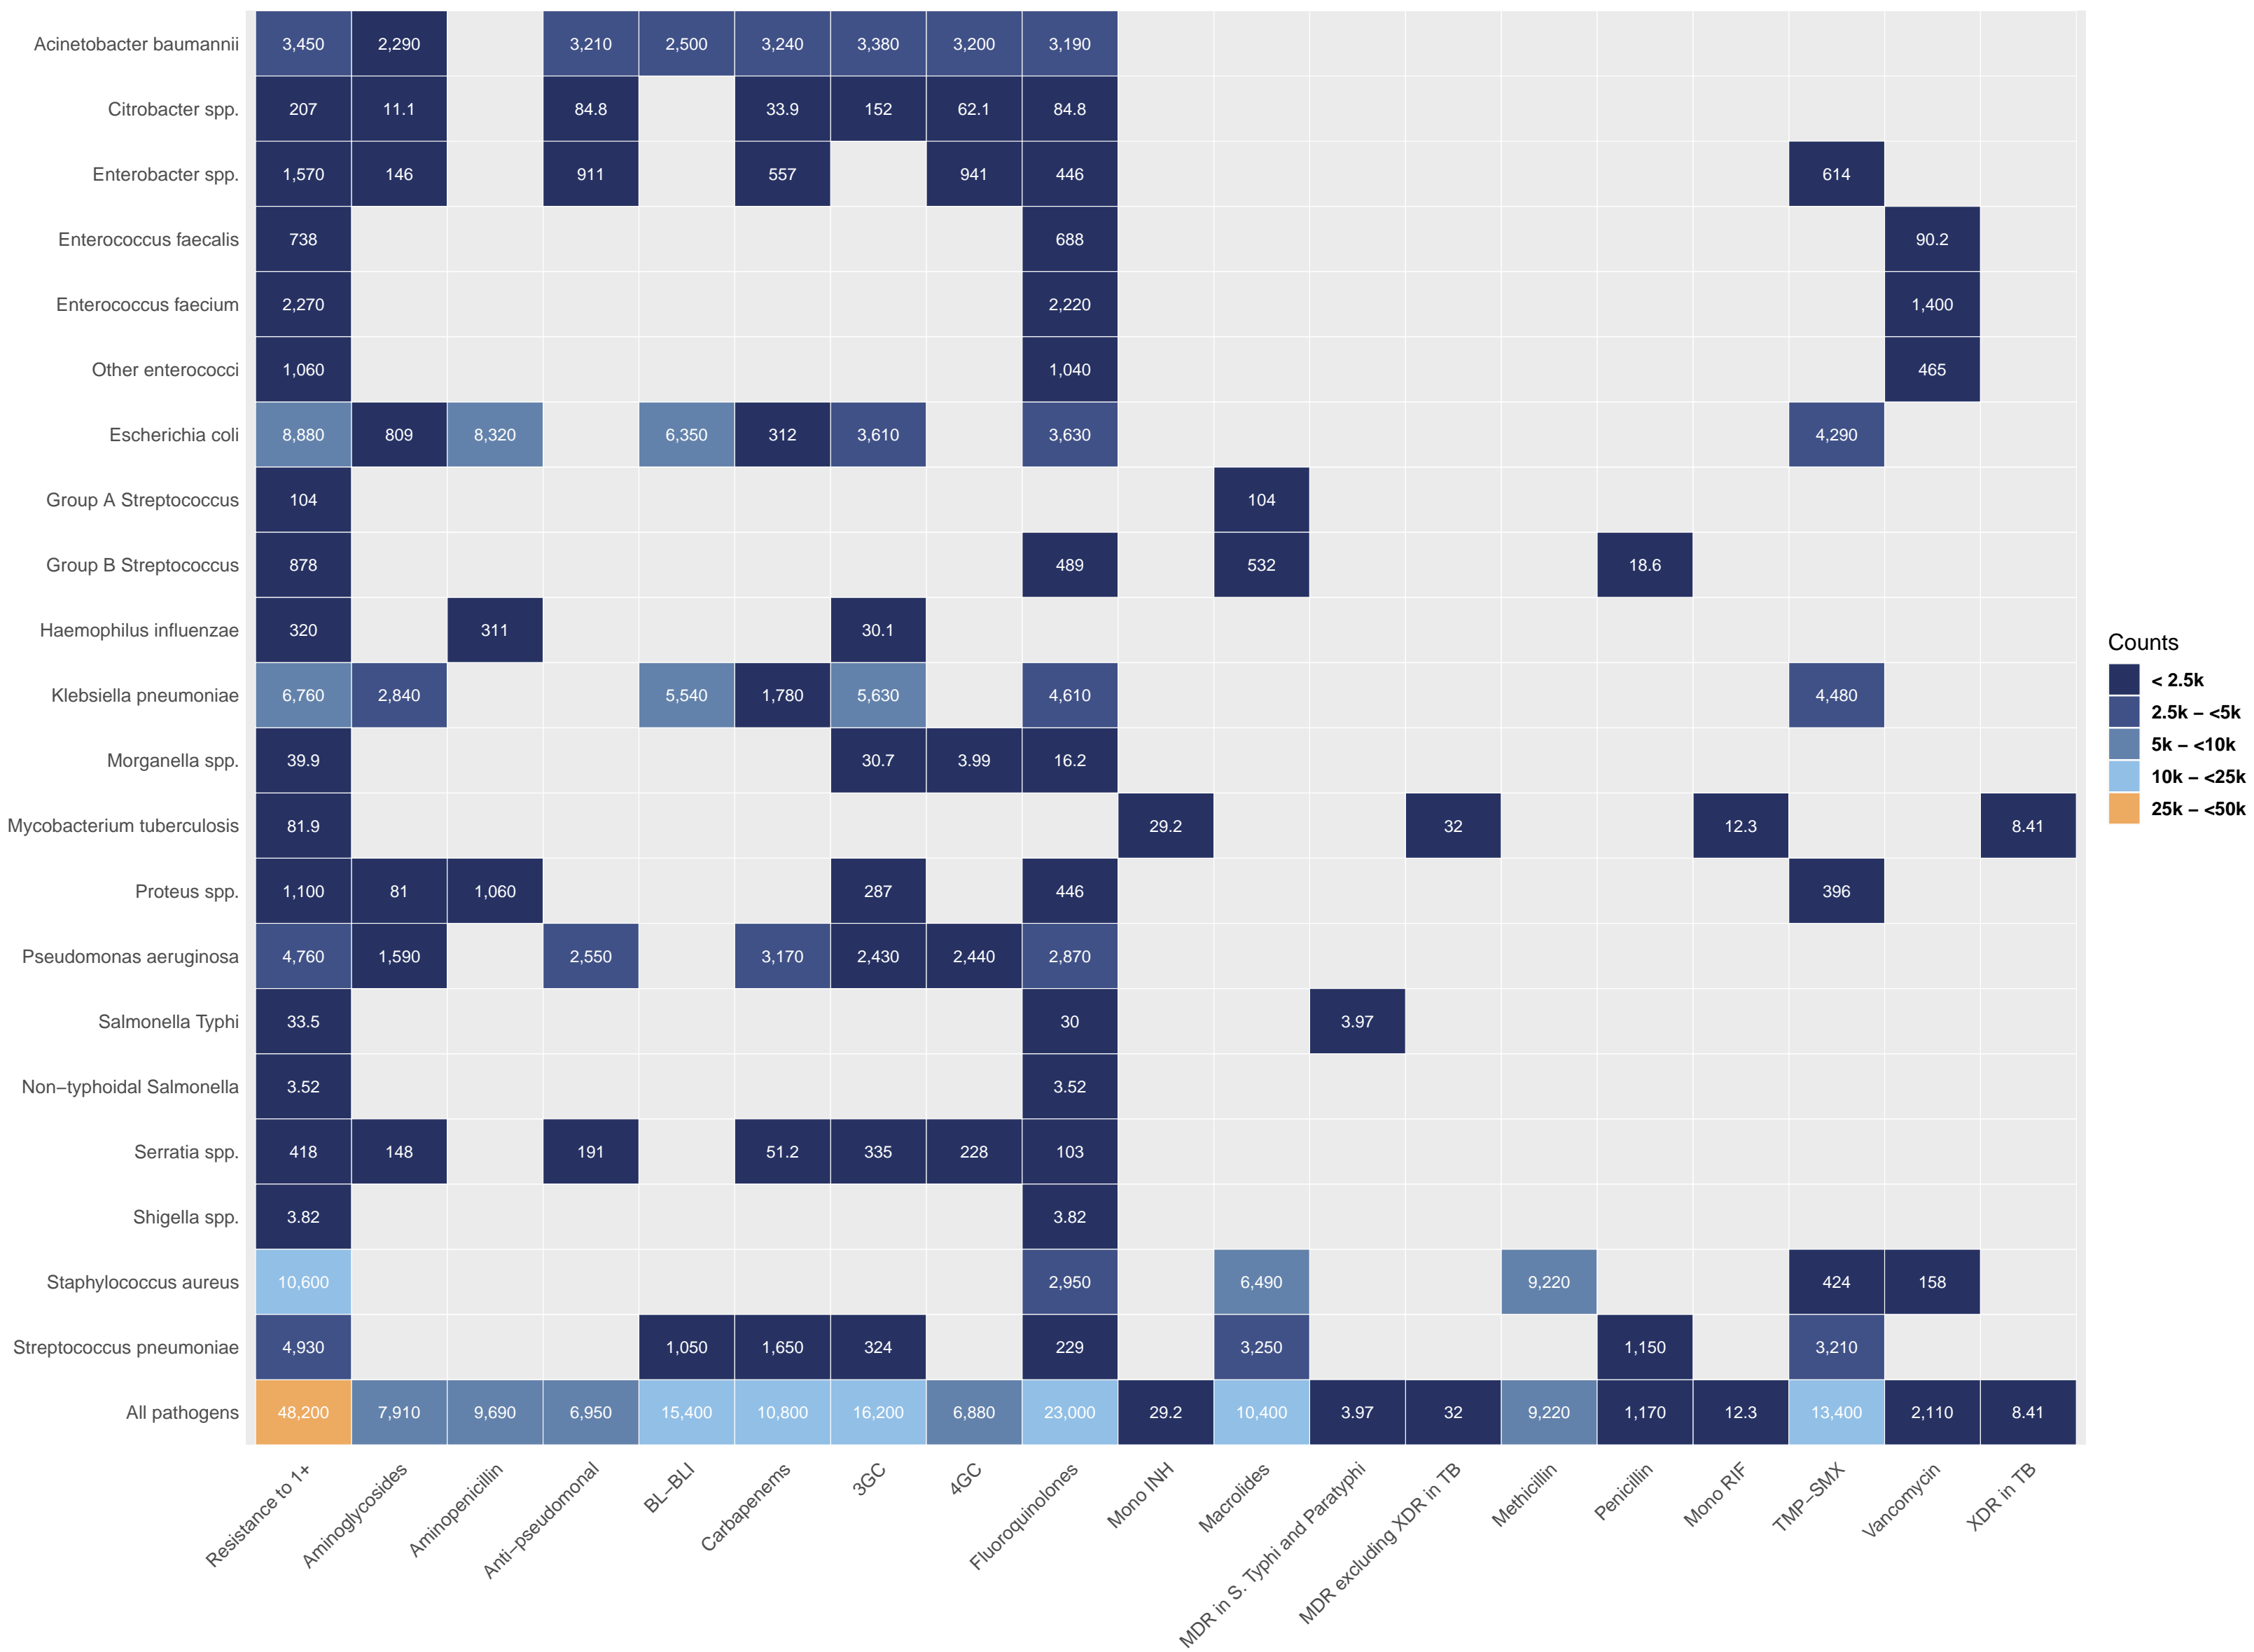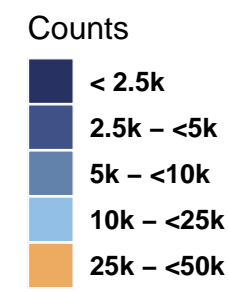

# Southern Latin America

Deaths (count) *attributable to* bacterial antimicrobial resistance by pathogen–drug combinations, 2019

|                            |                  |                 |                 |                  |        |             |       |      |                  |          |            |                               |                         |             |            |          |         |            |           |
|----------------------------|------------------|-----------------|-----------------|------------------|--------|-------------|-------|------|------------------|----------|------------|-------------------------------|-------------------------|-------------|------------|----------|---------|------------|-----------|
| Acinetobacter baumannii    | 1,110            | 95              |                 | 20               | 0.113  | 552         | 35.4  | 7.94 | 399              |          |            |                               |                         |             |            |          |         |            |           |
| Citrobacter spp.           | 59.9             | 0.662           |                 | 17.6             |        | 8.42        | 13.9  | 5.02 | 14.4             |          |            |                               |                         |             |            |          |         |            |           |
| Enterobacter spp.          | 393              | 9.6             |                 | 105              |        | 148         |       | 47   | 47.9             |          |            |                               |                         |             |            |          | 35.8    |            |           |
| Enterococcus faecalis      | 202              |                 |                 |                  |        |             |       |      | 172              |          |            |                               |                         |             |            |          |         | 30.4       |           |
| Enterococcus faecium       | 685              |                 |                 |                  |        |             |       |      | 358              |          |            |                               |                         |             |            |          |         | 328        |           |
| Other enterococci          | 253              |                 |                 |                  |        |             |       |      | 173              |          |            |                               |                         |             |            |          |         | 79.4       |           |
| Escherichia coli           | 2,050            | 57.7            | 193             |                  | 457    | 85          | 584   |      | 405              |          |            |                               |                         |             |            |          |         | 271        |           |
| Group A Streptococcus      | 10               |                 |                 |                  |        |             |       |      |                  |          | 10         |                               |                         |             |            |          |         |            |           |
| Group B Streptococcus      | 146              |                 |                 |                  |        |             |       |      | 91.1             |          | 51         |                               |                         |             | 4.15       |          |         |            |           |
| Haemophilus influenzae     | 62.6             |                 | 53.6            |                  |        |             |       | 9.08 |                  |          |            |                               |                         |             |            |          |         |            |           |
| Klebsiella pneumoniae      | 1,940            | 225             |                 |                  | 102    | 392         | 665   |      | 337              |          |            |                               |                         |             |            |          |         | 223        |           |
| Morganella spp.            | 10.6             |                 |                 |                  |        |             |       | 6.93 | 0.948            | 2.7      |            |                               |                         |             |            |          |         |            |           |
| Mycobacterium tuberculosis | 32.3             |                 |                 |                  |        |             |       |      |                  | 4.63     |            |                               | 19.1                    |             |            | 3.43     |         |            | 5.16      |
| Proteus spp.               | 143              | 4.29            | 24.4            |                  |        |             |       | 66   |                  |          |            |                               |                         |             |            |          |         | 14.7       |           |
| Pseudomonas aeruginosa     | 1,170            | 39.6            |                 | 170              |        | 554         | 58.8  | 45.9 | 305              |          |            |                               |                         |             |            |          |         |            |           |
| Salmonella Typhi           | 6.65             |                 |                 |                  |        |             |       |      | 6.15             |          |            | 0.503                         |                         |             |            |          |         |            |           |
| Non-typhoidal Salmonella   | 0.738            |                 |                 |                  |        |             |       |      | 0.738            |          |            |                               |                         |             |            |          |         |            |           |
| Serratia spp.              | 110              | 8.49            |                 | 38.6             |        | 13.2        | 18.3  | 20.9 | 10.6             |          |            |                               |                         |             |            |          |         |            |           |
| Shigella spp.              | 0.793            |                 |                 |                  |        |             |       |      | 0.793            |          |            |                               |                         |             |            |          |         |            |           |
| Staphylococcus aureus      | 3,080            |                 |                 |                  |        |             |       |      | 142              |          | 256        |                               |                         | 2,610       |            |          |         | 35.7       | 42.1      |
| Streptococcus pneumoniae   | 913              |                 |                 |                  | 27.8   | 369         | 4.96  |      | 29               |          | 144        |                               |                         | 46.9        |            |          |         | 291        |           |
| All pathogens              | 12,400           | 441             | 271             | 351              | 587    | 2,120       | 1,460 | 128  | 2,530            | 4.63     | 461        | 0.503                         | 19.1                    | 2,610       | 51         | 3.43     | 870     | 480        | 5.16      |
|                            | Resistance to 1+ | Aminoglycosides | Aminopenicillin | Anti-pseudomonal | BL-BLI | Carbapenems | 3GC   | 4GC  | Fluoroquinolones | Mono INH | Macrolides | MDR in S. Typhi and Paratyphi | MDR excluding XDR in TB | Methicillin | Penicillin | Mono RIF | TMP-SMX | Vancomycin | XDR in TB |

Counts

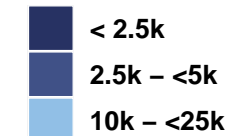

# Tropical Latin America

Deaths (count) associated with bacterial antimicrobial resistance by pathogen–drug combinations, 2019

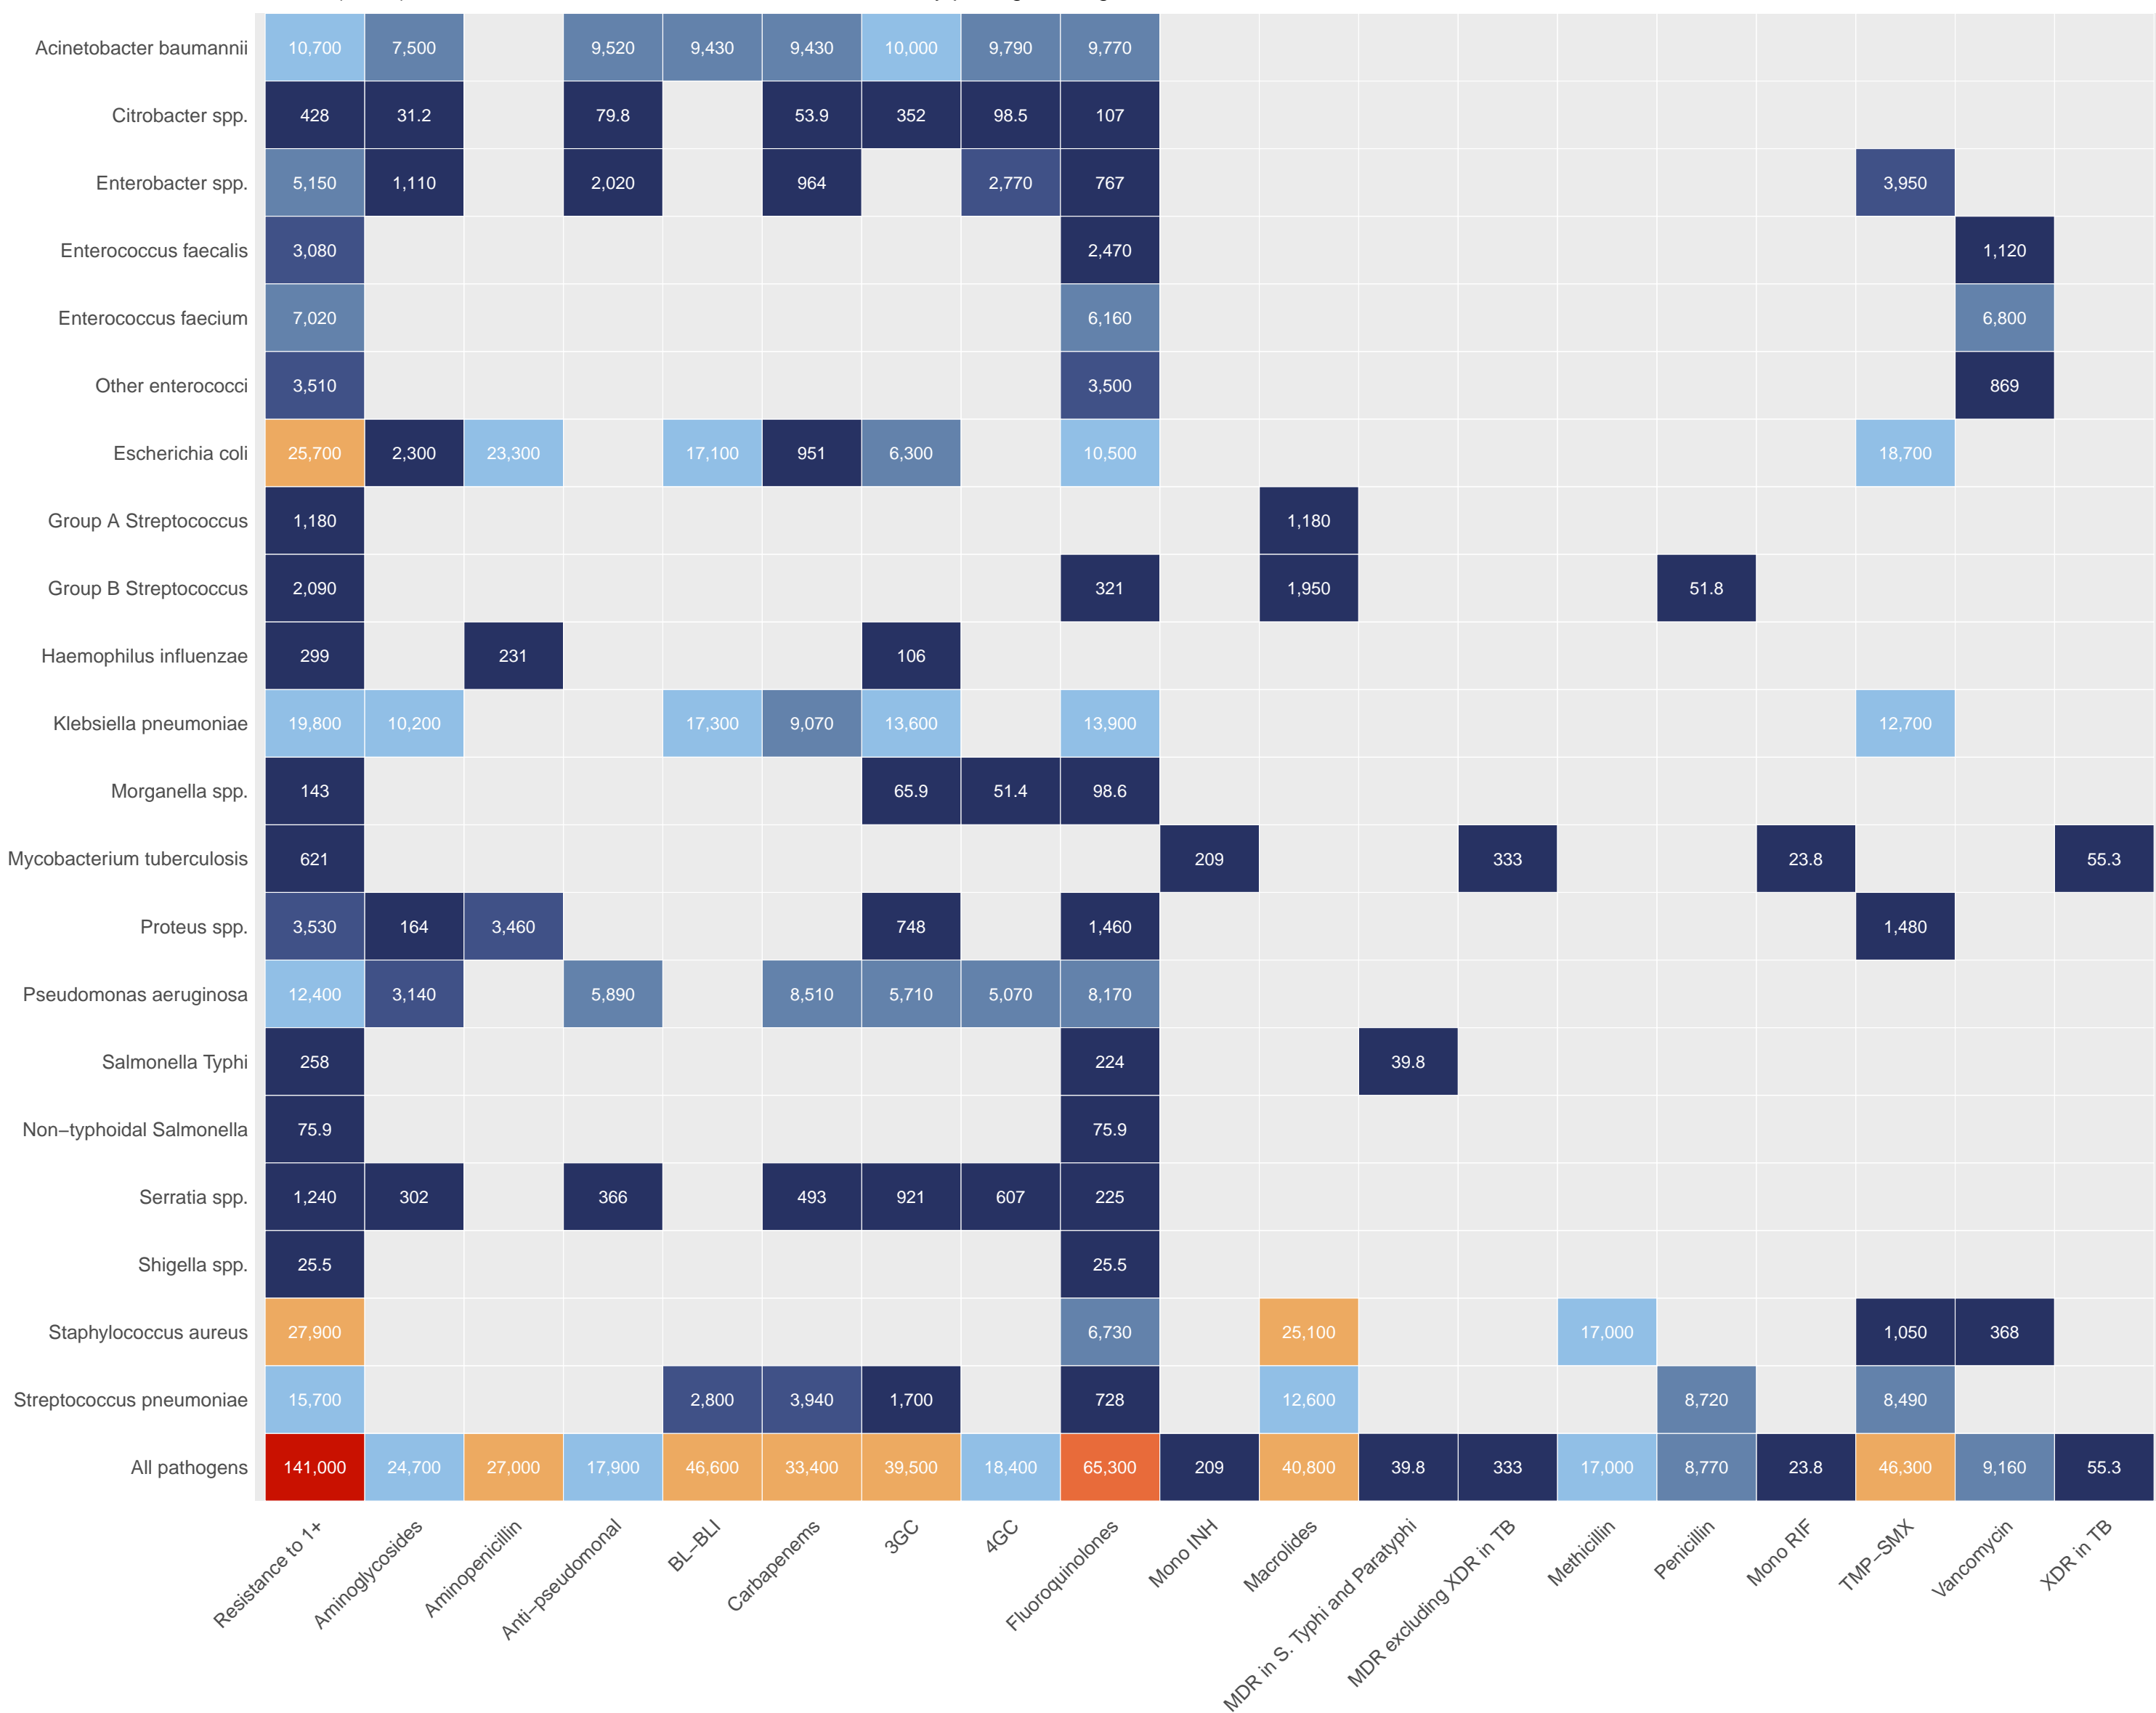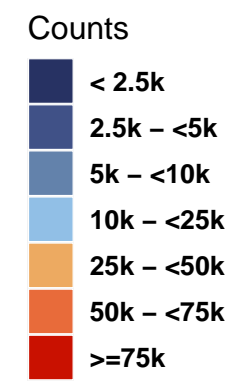

# Tropical Latin America

Deaths (count) *attributable to* bacterial antimicrobial resistance by pathogen–drug combinations, 2019

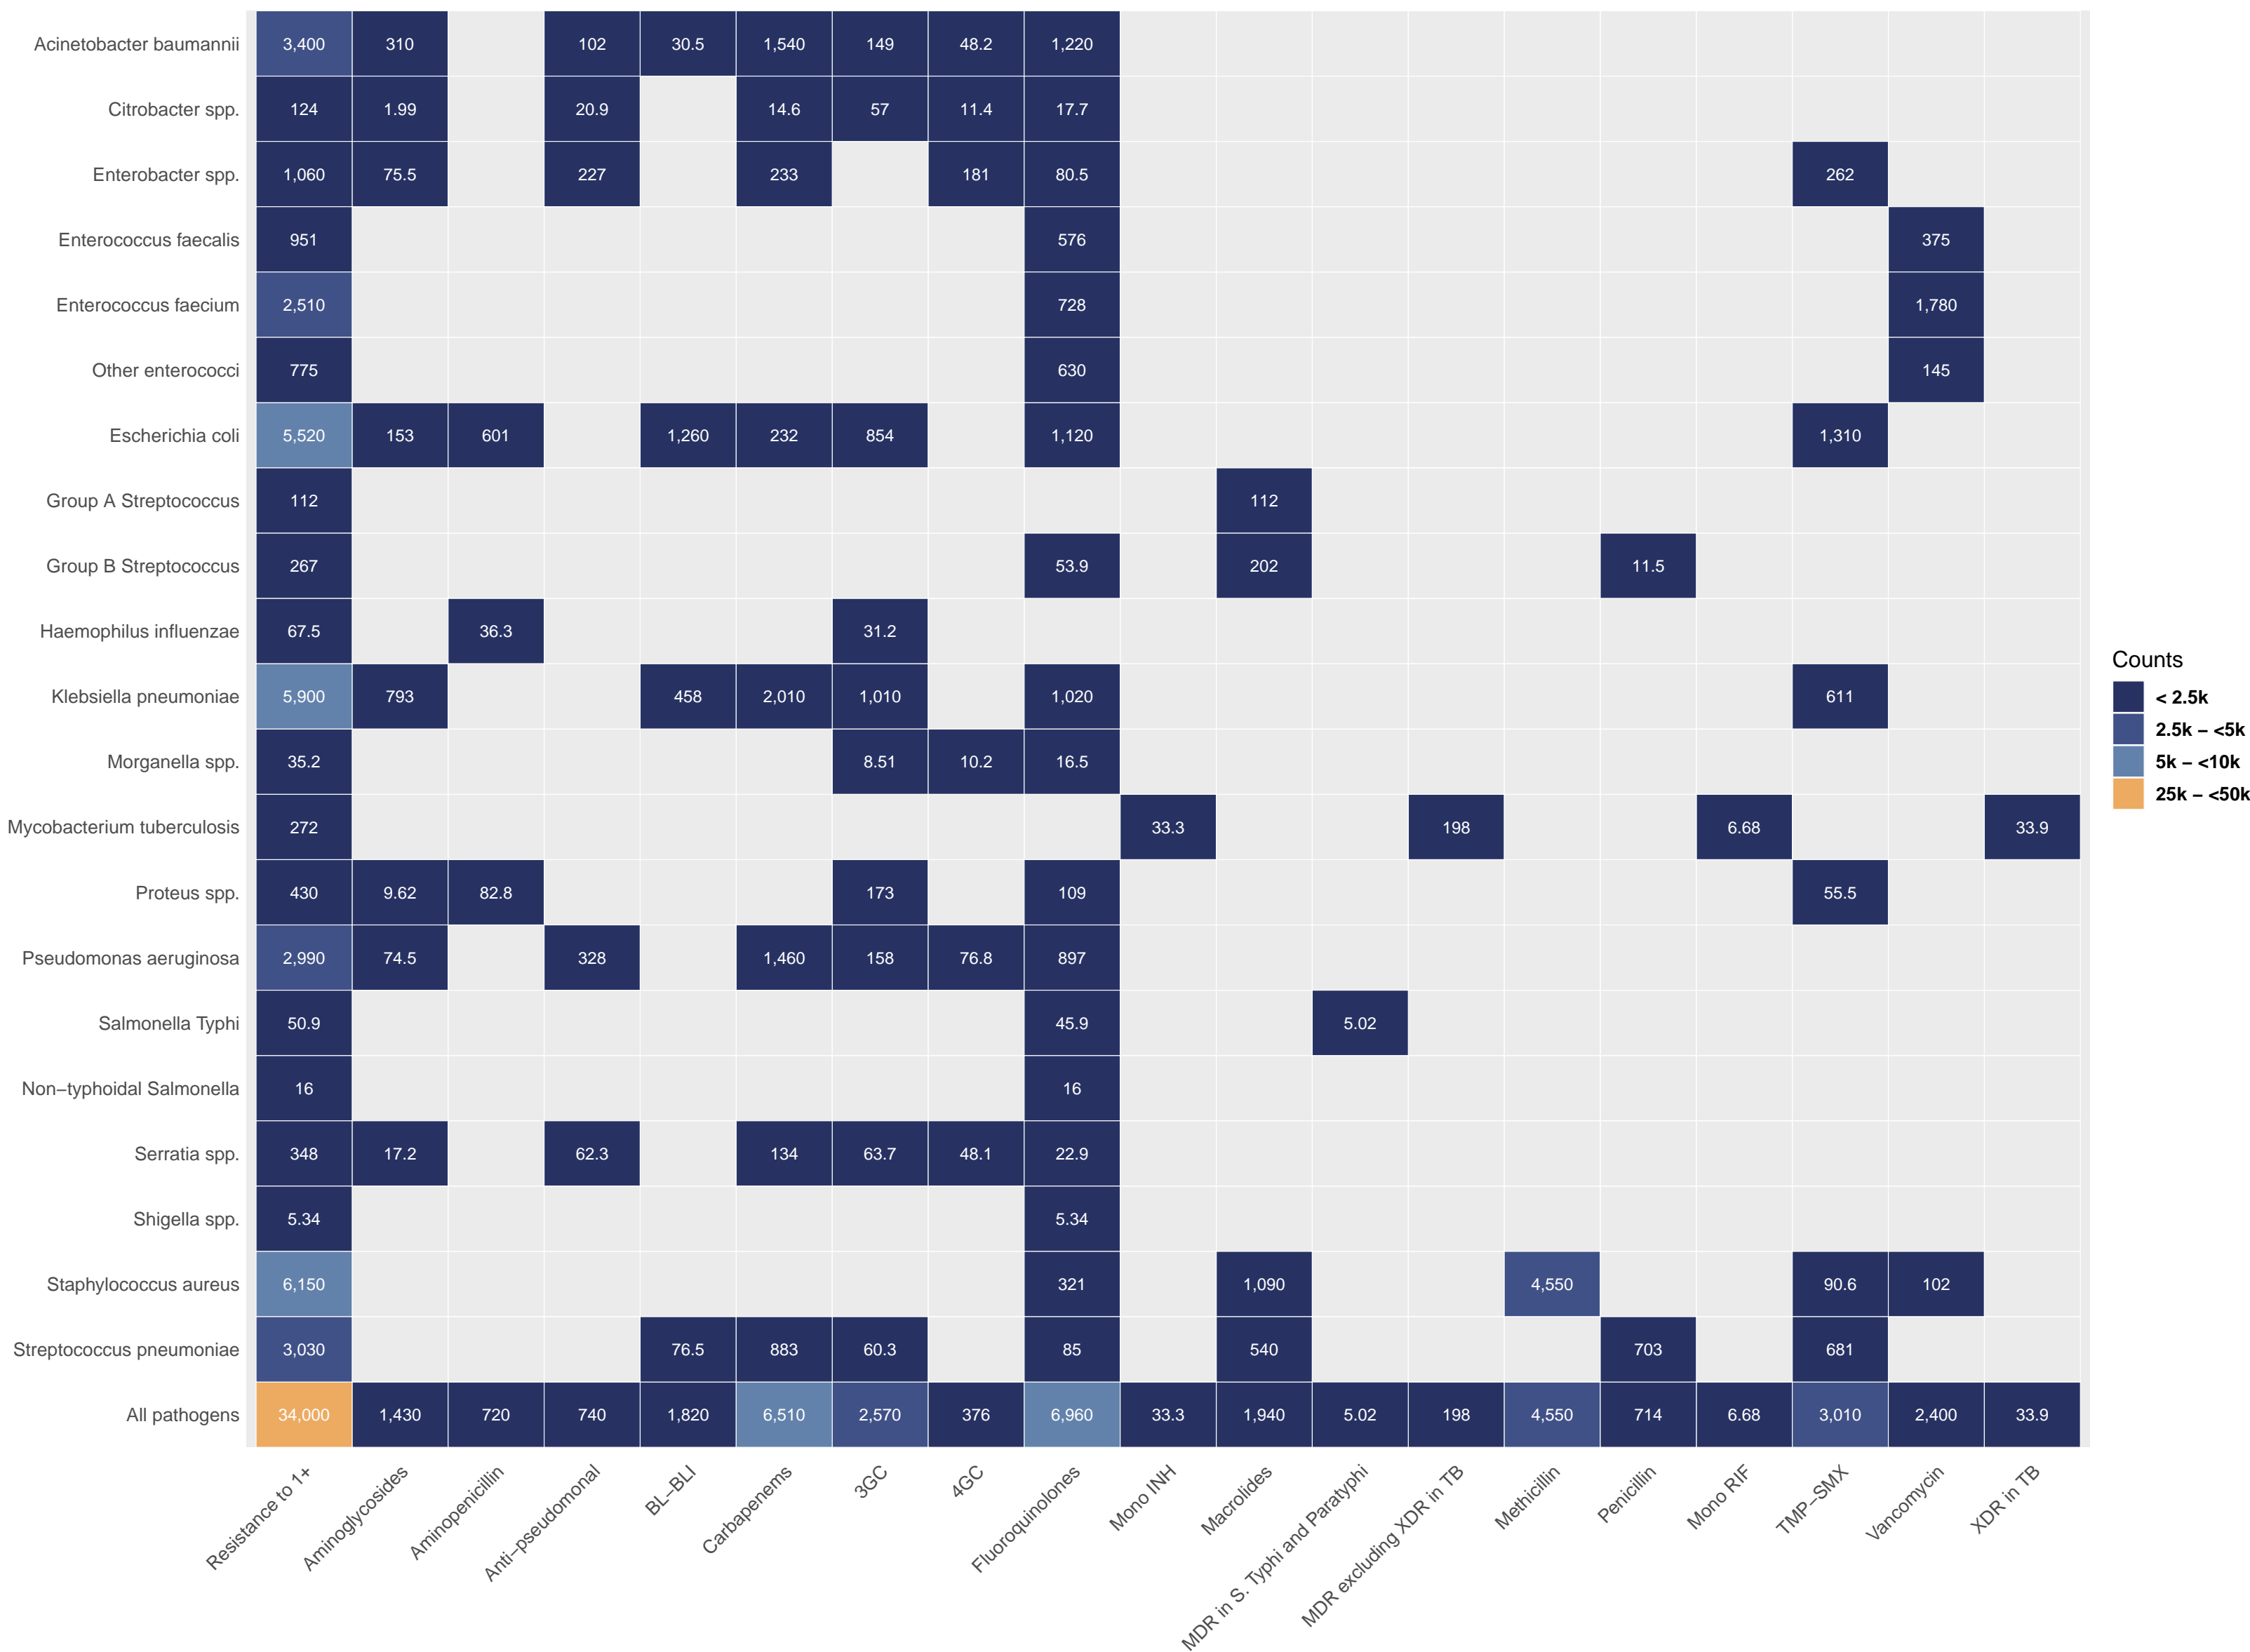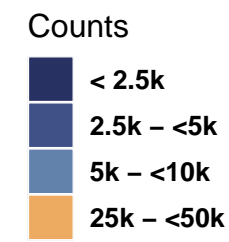

# Antigua and Barbuda

Deaths (count) associated with bacterial antimicrobial resistance by pathogen–drug combinations, 2019

|                            |                  |                 |                 |                  |        |             |       |       |                  |          |            |                               |                         |             |            |          |         |            |           |
|----------------------------|------------------|-----------------|-----------------|------------------|--------|-------------|-------|-------|------------------|----------|------------|-------------------------------|-------------------------|-------------|------------|----------|---------|------------|-----------|
| Acinetobacter baumannii    | 8.72             | 5.98            |                 | 8.11             | 7.07   | 7.35        | 7.75  | 7.48  | 8.6              |          |            |                               |                         |             |            |          |         |            |           |
| Citrobacter spp.           | 0.348            | 0.052           |                 | 0.068            |        | 0.063       | 0.236 | 0.157 | 0.12             |          |            |                               |                         |             |            |          |         |            |           |
| Enterobacter spp.          | 2.7              | 0.542           |                 | 1.01             |        | 0.674       |       | 1.2   | 1.09             |          |            |                               |                         |             |            |          | 1.81    |            |           |
| Enterococcus faecalis      | 1.06             |                 |                 |                  |        |             |       |       | 1.01             |          |            |                               |                         |             |            |          |         | 0.123      |           |
| Enterococcus faecium       | 2.05             |                 |                 |                  |        |             |       |       | 2.02             |          |            |                               |                         |             |            |          |         | 0.834      |           |
| Other enterococci          | 1.43             |                 |                 |                  |        |             |       |       | 1.42             |          |            |                               |                         |             |            |          |         | 0.332      |           |
| Escherichia coli           | 7.49             | 0.769           | 7.03            |                  | 5.89   | 0.612       | 3.82  |       | 4.37             |          |            |                               |                         |             |            |          |         | 5.01       |           |
| Group A Streptococcus      | 0.517            |                 |                 |                  |        |             |       |       |                  |          | 0.517      |                               |                         |             |            |          |         |            |           |
| Group B Streptococcus      | 0.729            |                 |                 |                  |        |             |       |       | 0.178            |          | 0.63       |                               |                         | 0.03        |            |          |         |            |           |
| Haemophilus influenzae     | 0.123            |                 | 0.099           |                  |        |             | 0.04  |       |                  |          |            |                               |                         |             |            |          |         |            |           |
| Klebsiella pneumoniae      | 5.45             | 1.29            |                 |                  | 4.43   | 0.563       | 3.59  |       | 3.12             |          |            |                               |                         |             |            |          |         | 4.41       |           |
| Morganella spp.            | 0.036            |                 |                 |                  |        |             | 0.008 | 0.005 | 0.033            |          |            |                               |                         |             |            |          |         |            |           |
| Mycobacterium tuberculosis | 0.008            |                 |                 |                  |        |             |       |       |                  | 0.001    |            |                               | 0.005                   |             |            | 0.0005   |         |            | 0.0008    |
| Proteus spp.               | 1.04             | 0.068           | 0.938           |                  |        |             | 0.203 |       | 0.502            |          |            |                               |                         |             |            |          |         | 0.666      |           |
| Pseudomonas aeruginosa     | 4                | 1.4             |                 | 1.72             |        | 3           | 1.63  | 1.36  | 2.4              |          |            |                               |                         |             |            |          |         |            |           |
| Salmonella Typhi           | 0.04             |                 |                 |                  |        |             |       |       | 0.034            |          |            | 0.007                         |                         |             |            |          |         |            |           |
| Non-typhoidal Salmonella   | 0.011            |                 |                 |                  |        |             |       |       | 0.011            |          |            |                               |                         |             |            |          |         |            |           |
| Serratia spp.              | 0.412            | 0.125           |                 | 0.117            |        | 0.115       | 0.289 | 0.132 | 0.089            |          |            |                               |                         |             |            |          |         |            |           |
| Shigella spp.              | 0.003            |                 |                 |                  |        |             |       |       | 0.003            |          |            |                               |                         |             |            |          |         |            |           |
| Staphylococcus aureus      | 7.23             |                 |                 |                  |        |             |       |       | 2.13             |          | 4.53       |                               | 6.21                    |             |            |          |         | 1.38       | 0.135     |
| Streptococcus pneumoniae   | 5.56             |                 |                 |                  | 1.12   | 2.19        | 1.11  |       | 0.25             |          | 4.19       |                               |                         | 2.47        |            |          |         | 3.67       |           |
| All pathogens              | 48.9             | 10.2            | 8.07            | 11               | 18.5   | 14.6        | 18.7  | 10.3  | 27.4             | 0.001    | 9.87       | 0.007                         | 0.005                   | 6.21        | 2.5        | 0.0005   | 16.9    | 1.42       | 0.0008    |
|                            | Resistance to 1+ | Aminoglycosides | Aminopenicillin | Anti-pseudomonal | BL-BLI | Carbapenems | 3GC   | 4GC   | Fluoroquinolones | Mono INH | Macrolides | MDR in S. Typhi and Paratyphi | MDR excluding XDR in TB | Methicillin | Penicillin | Mono RIF | TMP-SMX | Vancomycin | XDR in TB |

Counts

< 500

# Antigua and Barbuda

Deaths (count) *attributable to* bacterial antimicrobial resistance by pathogen–drug combinations, 2019

|                            |                  |                 |                 |                  |        |             |       |        |                  |          |            |                               |                         |             |            |          |         |            |           |
|----------------------------|------------------|-----------------|-----------------|------------------|--------|-------------|-------|--------|------------------|----------|------------|-------------------------------|-------------------------|-------------|------------|----------|---------|------------|-----------|
| Acinetobacter baumannii    | 2.77             | 0.25            |                 | 0.14             | 0.006  | 1.19        | 0.061 | 0.009  | 1.11             |          |            |                               |                         |             |            |          |         |            |           |
| Citrobacter spp.           | 0.099            | 0.003           |                 | 0.014            |        | 0.016       | 0.028 | 0.019  | 0.019            |          |            |                               |                         |             |            |          |         |            |           |
| Enterobacter spp.          | 0.601            | 0.034           |                 | 0.103            |        | 0.164       |       | 0.06   | 0.125            |          |            |                               |                         |             |            | 0.114    |         |            |           |
| Enterococcus faecalis      | 0.288            |                 |                 |                  |        |             |       |        | 0.25             |          |            |                               |                         |             |            |          |         | 0.038      |           |
| Enterococcus faecium       | 0.557            |                 |                 |                  |        |             |       |        | 0.365            |          |            |                               |                         |             |            |          |         | 0.192      |           |
| Other enterococci          | 0.315            |                 |                 |                  |        |             |       |        | 0.259            |          |            |                               |                         |             |            |          |         | 0.056      |           |
| Escherichia coli           | 1.86             | 0.048           | 0.084           |                  | 0.289  | 0.138       | 0.531 |        | 0.472            |          |            |                               |                         |             |            |          | 0.301   |            |           |
| Group A Streptococcus      | 0.05             |                 |                 |                  |        |             |       |        |                  |          | 0.05       |                               |                         |             |            |          |         |            |           |
| Group B Streptococcus      | 0.101            |                 |                 |                  |        |             |       |        | 0.031            |          | 0.064      |                               |                         | 0.006       |            |          |         |            |           |
| Haemophilus influenzae     | 0.027            |                 | 0.016           |                  |        |             | 0.012 |        |                  |          |            |                               |                         |             |            |          |         |            |           |
| Klebsiella pneumoniae      | 1.36             | 0.108           |                 |                  | 0.133  | 0.149       | 0.501 |        | 0.222            |          |            |                               |                         |             |            |          | 0.248   |            |           |
| Morganella spp.            | 0.008            |                 |                 |                  |        |             | 0.001 | 0.0009 | 0.006            |          |            |                               |                         |             |            |          |         |            |           |
| Mycobacterium tuberculosis | 0.004            |                 |                 |                  |        |             |       |        |                  | 0.0002   |            |                               | 0.003                   |             |            | 0.0001   |         |            | 0.0005    |
| Proteus spp.               | 0.132            | 0.004           | 0.021           |                  |        |             | 0.046 |        | 0.036            |          |            |                               |                         |             |            |          |         | 0.025      |           |
| Pseudomonas aeruginosa     | 0.948            | 0.035           |                 | 0.071            |        | 0.525       | 0.046 | 0.014  | 0.255            |          |            |                               |                         |             |            |          |         |            |           |
| Salmonella Typhi           | 0.008            |                 |                 |                  |        |             |       |        | 0.007            |          |            | 0.0009                        |                         |             |            |          |         |            |           |
| Non-typhoidal Salmonella   | 0.002            |                 |                 |                  |        |             |       |        | 0.002            |          |            |                               |                         |             |            |          |         |            |           |
| Serratia spp.              | 0.108            | 0.008           |                 | 0.023            |        | 0.032       | 0.026 | 0.011  | 0.01             |          |            |                               |                         |             |            |          |         |            |           |
| Shigella spp.              | 0.0006           |                 |                 |                  |        |             |       |        | 0.0006           |          |            |                               |                         |             |            |          |         |            |           |
| Staphylococcus aureus      | 2.1              |                 |                 |                  |        |             |       |        | 0.097            |          | 0.168      |                               | 1.69                    |             |            |          | 0.119   | 0.032      |           |
| Streptococcus pneumoniae   | 1.15             |                 |                 |                  | 0.015  | 0.482       | 0.022 |        | 0.028            |          | 0.174      |                               |                         | 0.123       |            |          | 0.305   |            |           |
| All pathogens              | 12.5             | 0.489           | 0.12            | 0.351            | 0.443  | 2.7         | 1.27  | 0.114  | 3.3              | 0.0002   | 0.455      | 0.0009                        | 0.003                   | 1.69        | 0.13       | 0.0001   | 1.11    | 0.318      | 0.0005    |
|                            | Resistance to 1+ | Aminoglycosides | Aminopenicillin | Anti-pseudomonal | BL-BLI | Carbapenems | 3GC   | 4GC    | Fluoroquinolones | Mono INH | Macrolides | MDR in S. Typhi and Paratyphi | MDR excluding XDR in TB | Methicillin | Penicillin | Mono RIF | TMP-SMX | Vancomycin | XDR in TB |

Counts

< 500

# Argentina

Deaths (count) associated with bacterial antimicrobial resistance by pathogen–drug combinations, 2019

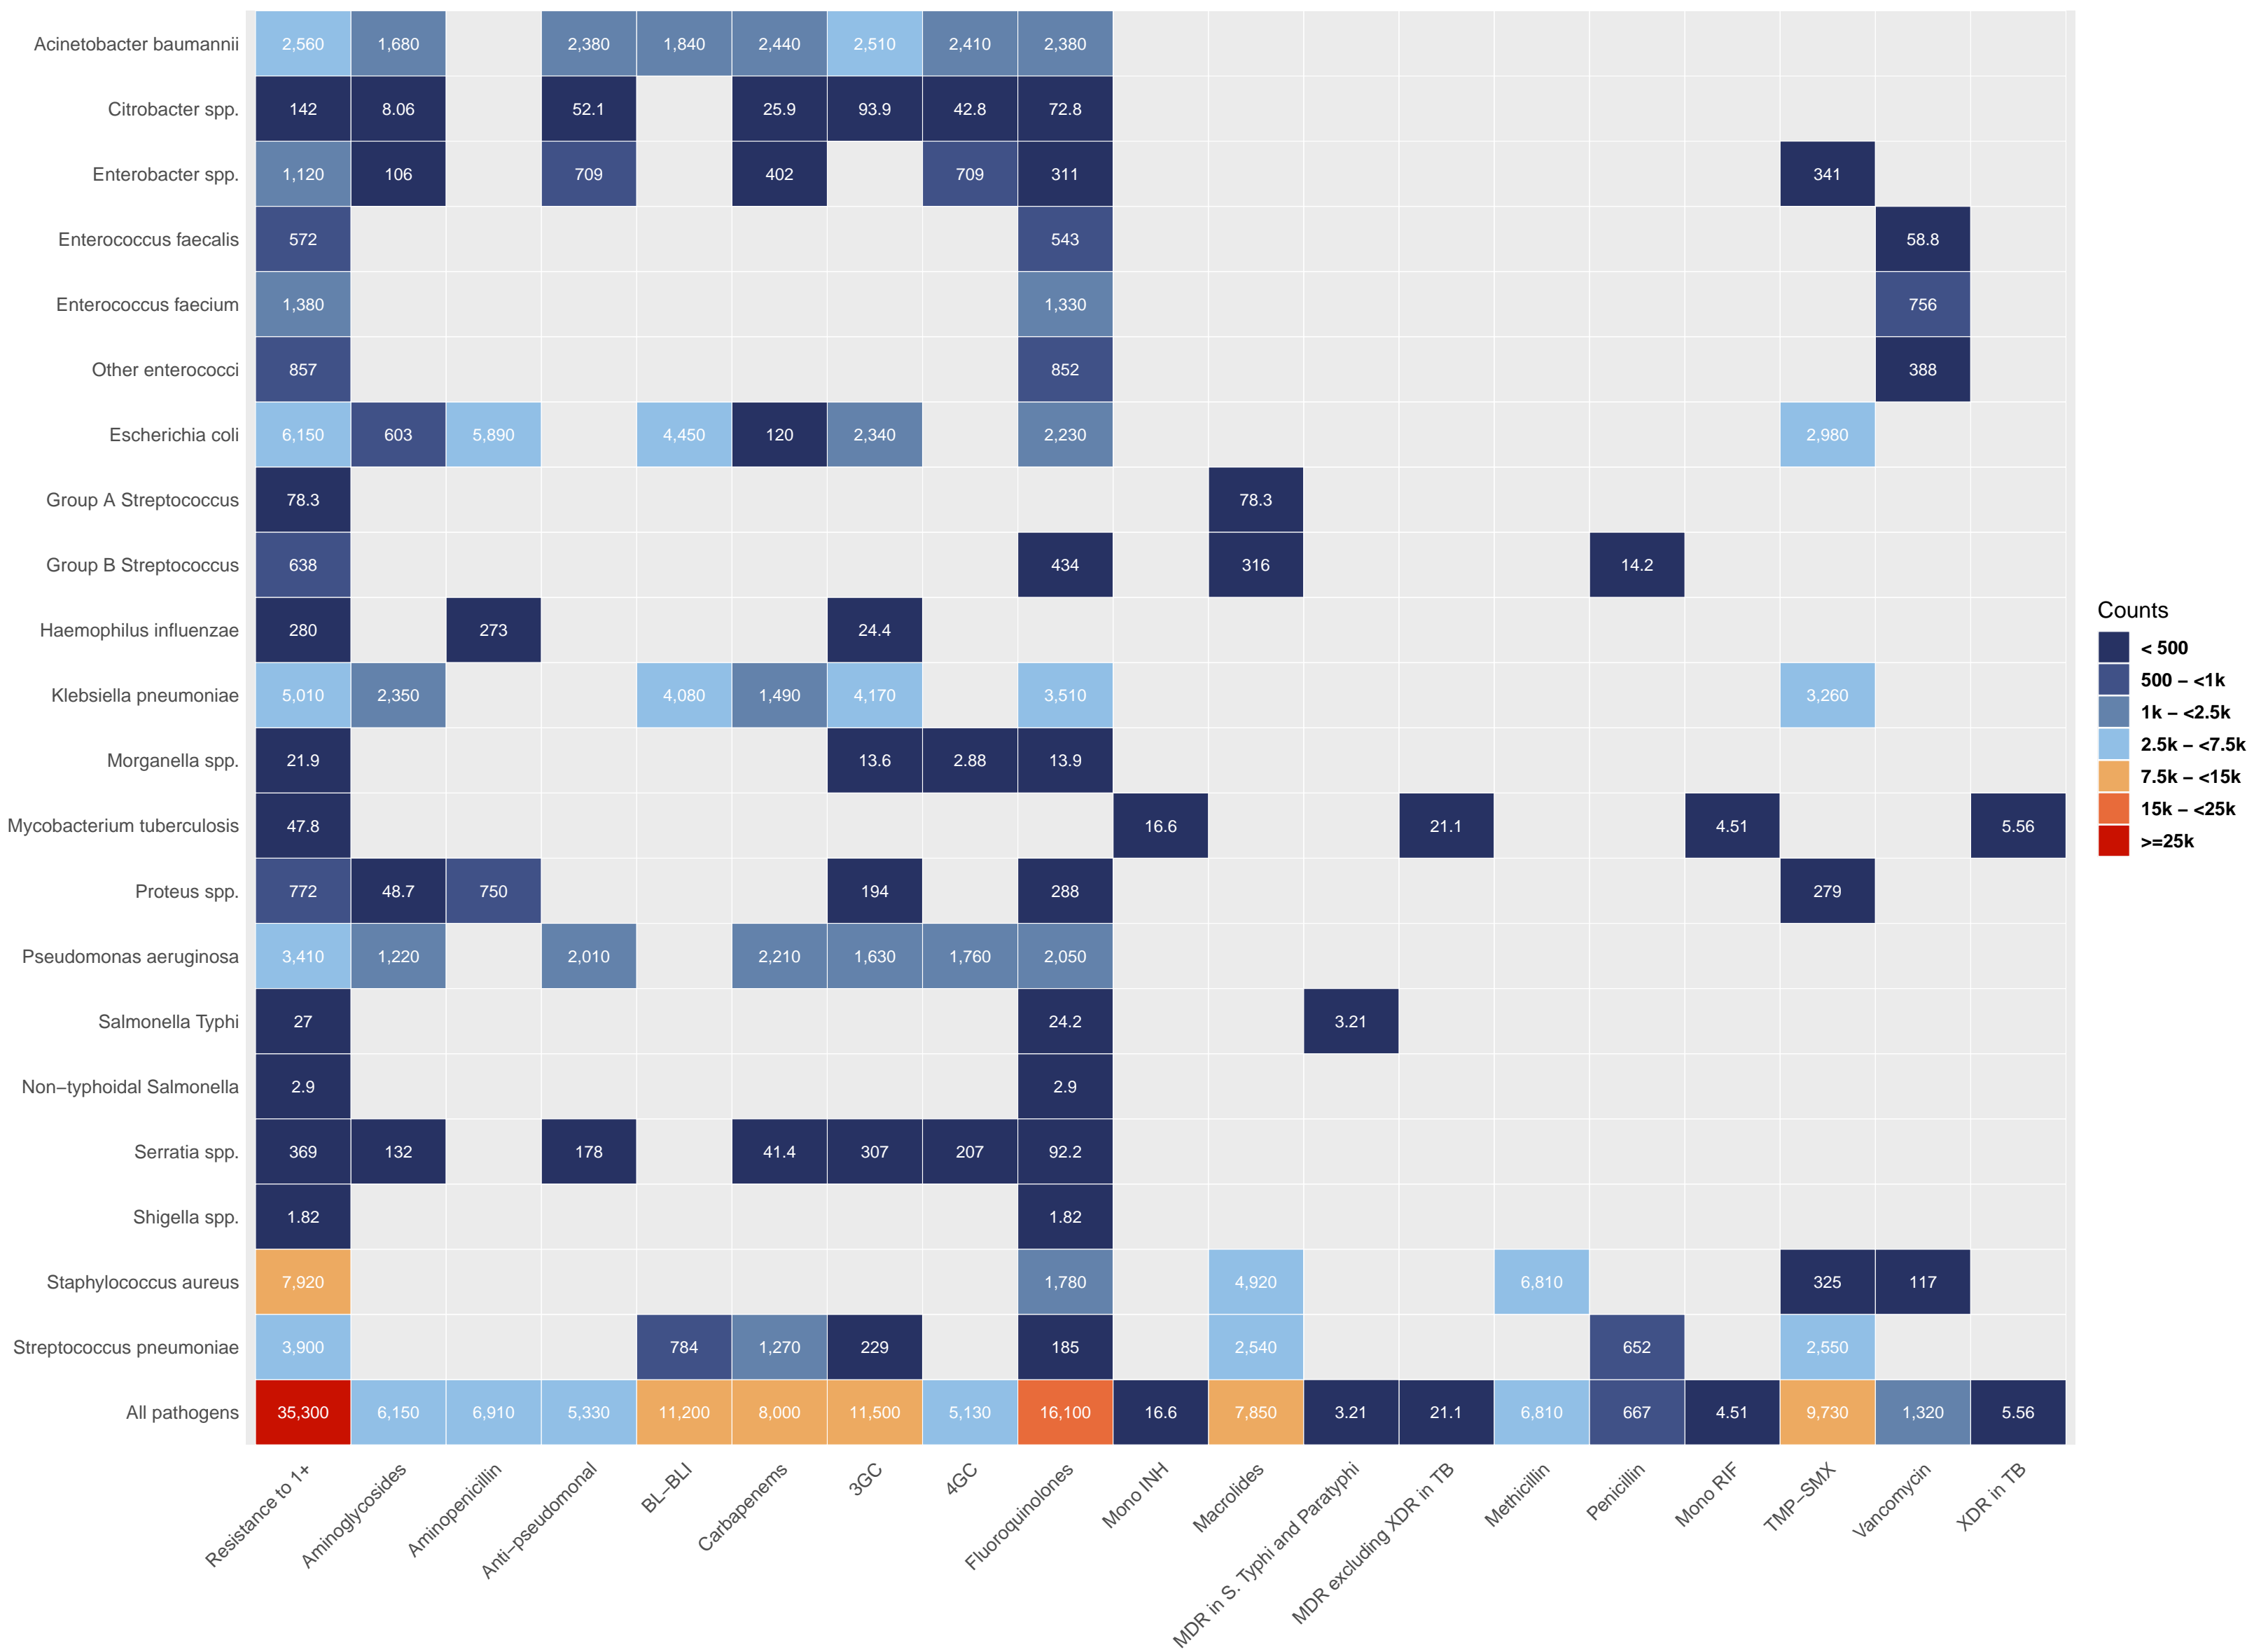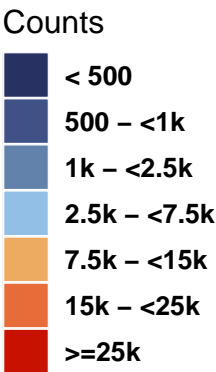



# Argentina

Deaths (count) *attributable to* bacterial antimicrobial resistance by pathogen–drug combinations, 2019

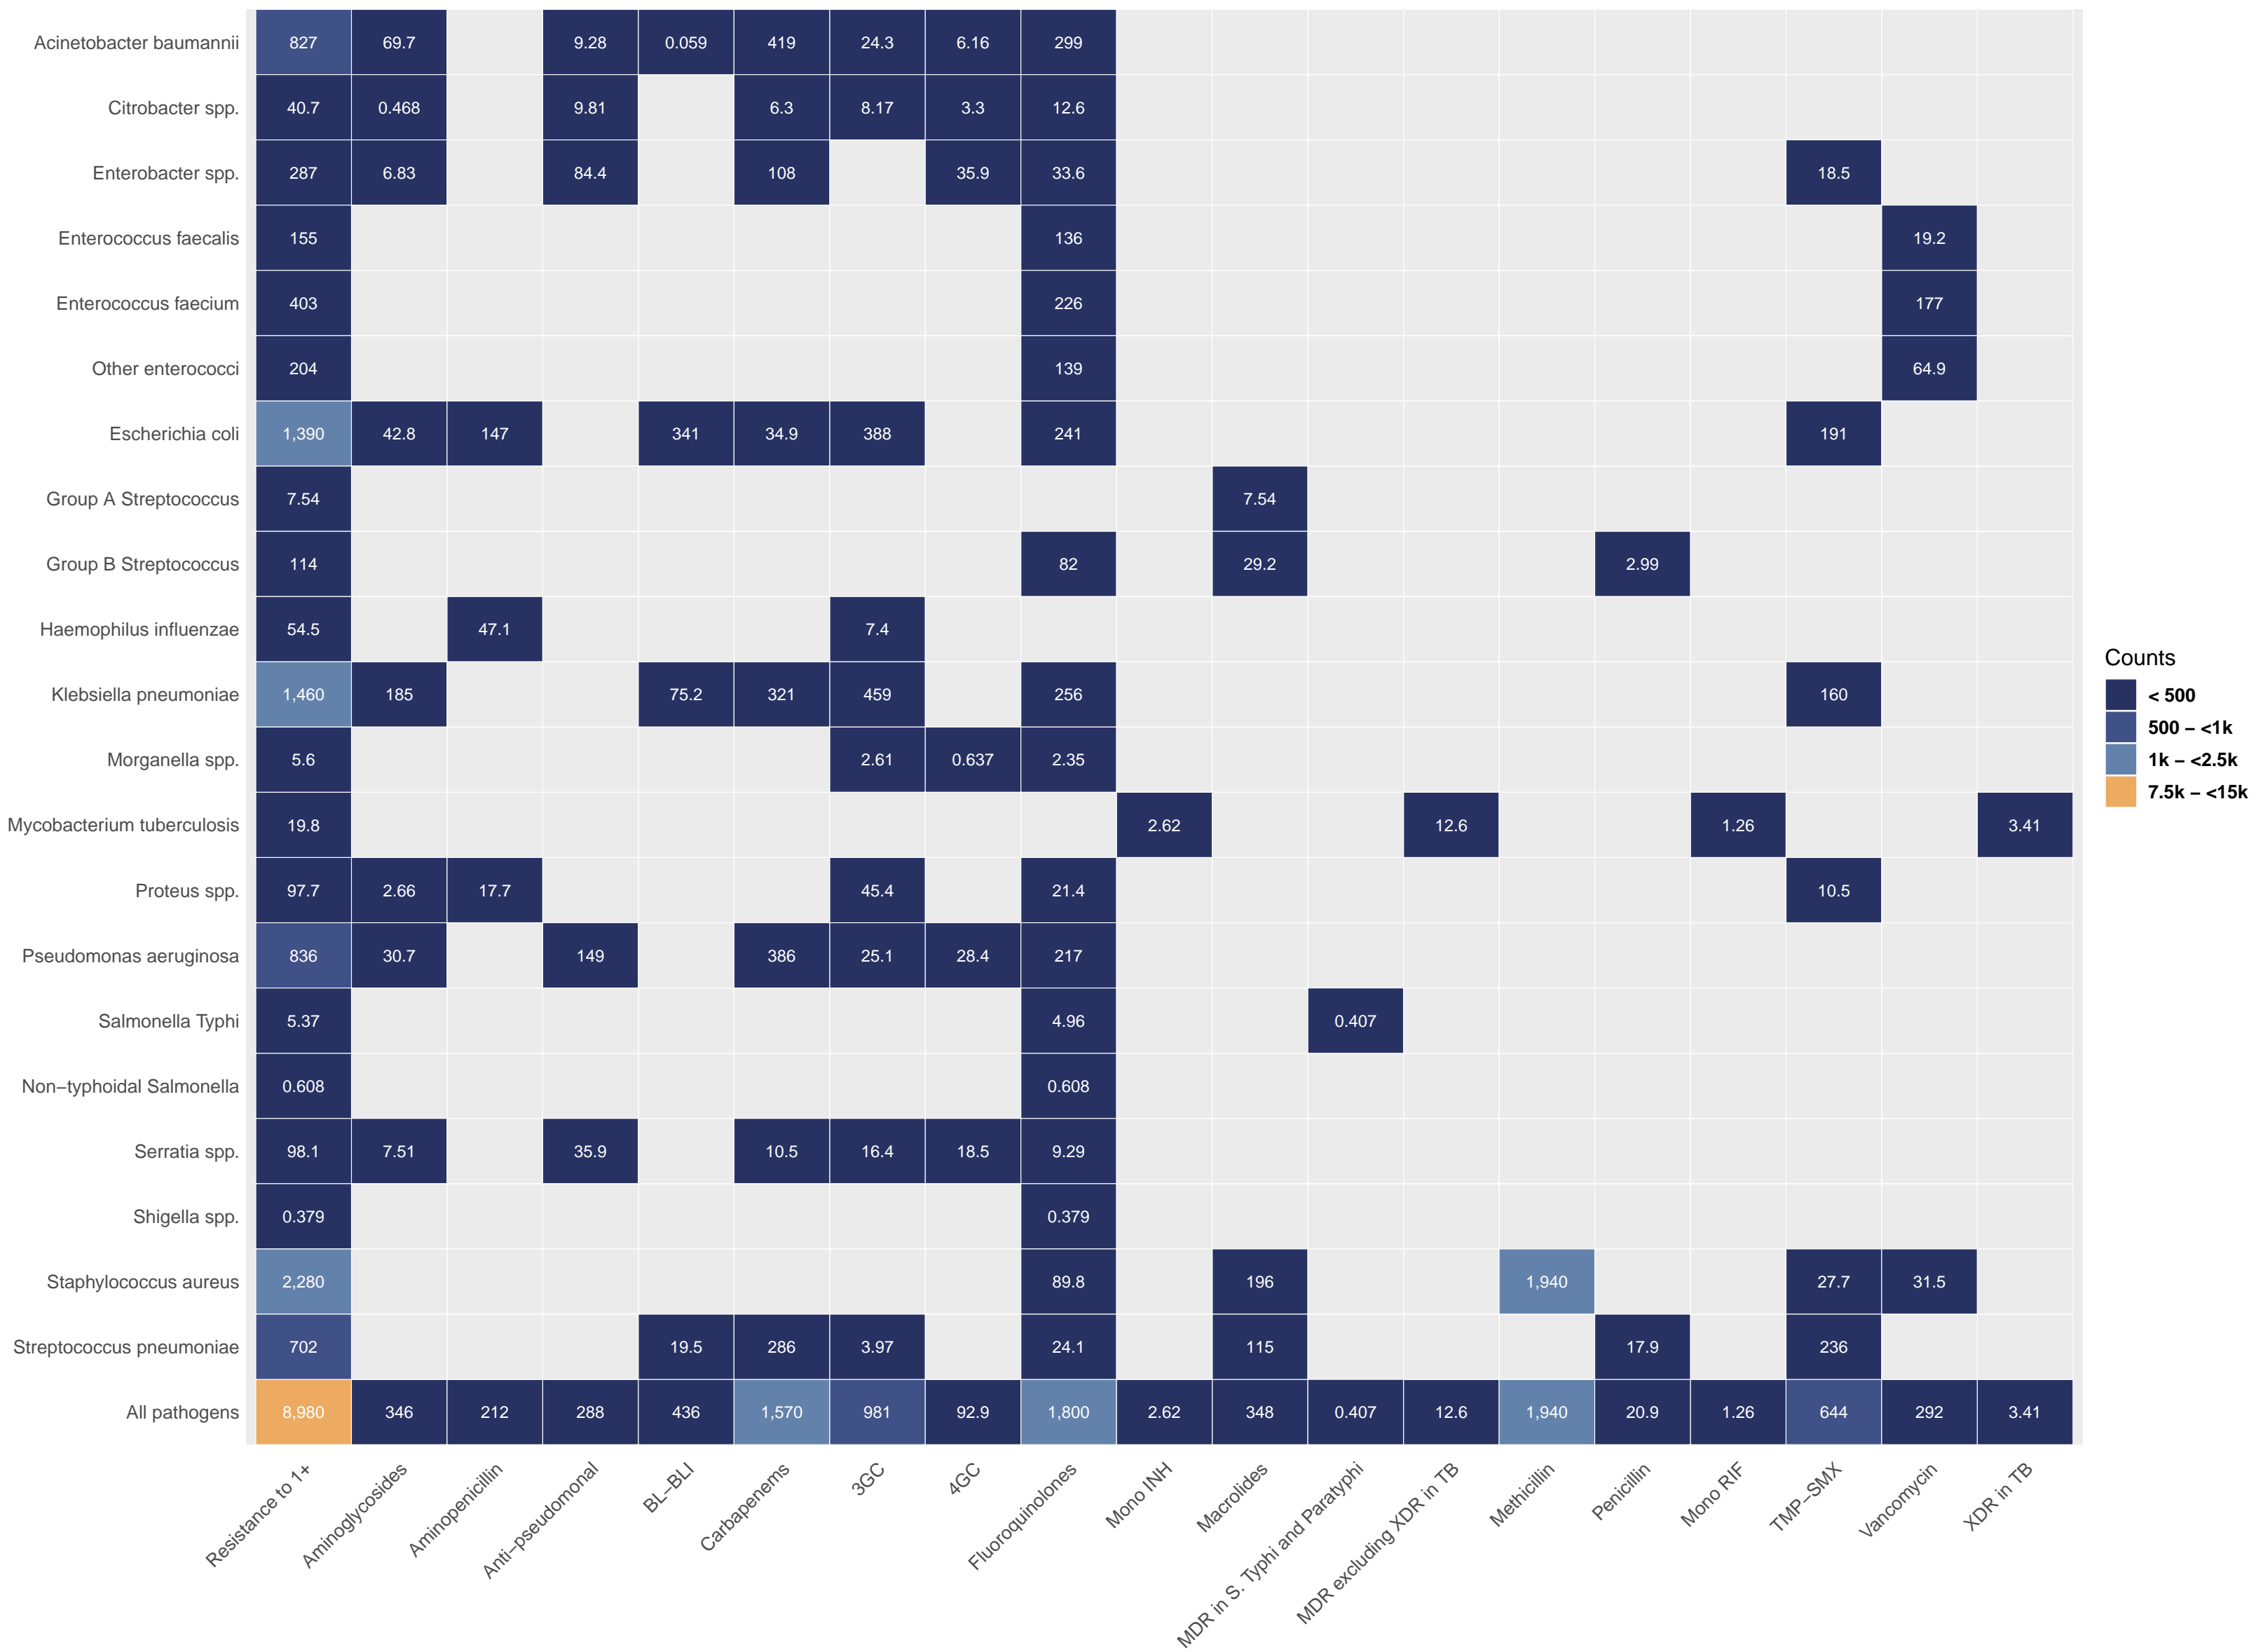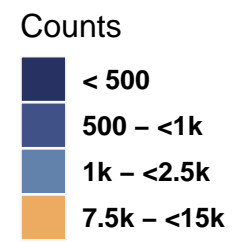

# Barbados

Deaths (count) associated with bacterial antimicrobial resistance by pathogen–drug combinations, 2019

|                            |                  |                 |                 |                  |        |             |       |       |                  |          |            |                               |                         |             |            |          |         |            |           |
|----------------------------|------------------|-----------------|-----------------|------------------|--------|-------------|-------|-------|------------------|----------|------------|-------------------------------|-------------------------|-------------|------------|----------|---------|------------|-----------|
| Acinetobacter baumannii    | 24.6             | 16.2            |                 | 22.4             | 18.2   | 20.6        | 20.5  | 20.2  | 24.2             |          |            |                               |                         |             |            |          |         |            |           |
| Citrobacter spp.           | 1.06             | 0.171           |                 | 0.213            |        | 0.204       | 0.784 | 0.387 | 0.308            |          |            |                               |                         |             |            |          |         |            |           |
| Enterobacter spp.          | 8.48             | 1.59            |                 | 2.93             |        | 2.21        |       | 3.71  | 3.65             |          |            |                               |                         |             |            |          | 5.63    |            |           |
| Enterococcus faecalis      | 6.8              |                 |                 |                  |        |             |       |       | 6.4              |          |            |                               |                         |             |            |          |         | 0.899      |           |
| Enterococcus faecium       | 13.4             |                 |                 |                  |        |             |       |       | 13.2             |          |            |                               |                         |             |            |          |         | 4.87       |           |
| Other enterococci          | 11.4             |                 |                 |                  |        |             |       |       | 11.3             |          |            |                               |                         |             |            |          |         | 2.51       |           |
| Escherichia coli           | 65.5             | 5.78            | 60.2            |                  | 48.1   | 4.67        | 34.4  |       | 42.5             |          |            |                               |                         |             |            |          |         | 43.3       |           |
| Group A Streptococcus      | 5.14             |                 |                 |                  |        |             |       |       |                  |          | 5.14       |                               |                         |             |            |          |         |            |           |
| Group B Streptococcus      | 5.72             |                 |                 |                  |        |             |       |       | 1.56             |          | 4.8        |                               |                         | 0.251       |            |          |         |            |           |
| Haemophilus influenzae     | 0.705            |                 | 0.591           |                  |        |             | 0.2   |       |                  |          |            |                               |                         |             |            |          |         |            |           |
| Klebsiella pneumoniae      | 40.1             | 8.31            |                 |                  | 31.9   | 3.92        | 29.9  |       | 21.7             |          |            |                               |                         |             |            |          |         | 30.2       |           |
| Morganella spp.            | 0.319            |                 |                 |                  |        |             | 0.072 | 0.047 | 0.294            |          |            |                               |                         |             |            |          |         |            |           |
| Mycobacterium tuberculosis | 0.031            |                 |                 |                  |        |             |       |       |                  | 0.013    |            |                               | 0.013                   |             |            | 0.002    |         |            | 0.002     |
| Proteus spp.               | 8.22             | 0.356           | 7.25            |                  |        |             | 1.45  |       | 3.92             |          |            |                               |                         |             |            |          |         | 5.25       |           |
| Pseudomonas aeruginosa     | 26.6             | 8.39            |                 | 11.9             |        | 19.1        | 10.8  | 9.21  | 15.9             |          |            |                               |                         |             |            |          |         |            |           |
| Salmonella Typhi           | 0.456            |                 |                 |                  |        |             |       |       | 0.321            |          |            | 0.179                         |                         |             |            |          |         |            |           |
| Non-typhoidal Salmonella   | 0.026            |                 |                 |                  |        |             |       |       | 0.026            |          |            |                               |                         |             |            |          |         |            |           |
| Serratia spp.              | 1.77             | 0.465           |                 | 0.566            |        | 0.409       | 1.31  | 0.585 | 0.401            |          |            |                               |                         |             |            |          |         |            |           |
| Shigella spp.              | 0.006            |                 |                 |                  |        |             |       |       | 0.006            |          |            |                               |                         |             |            |          |         |            |           |
| Staphylococcus aureus      | 64.3             |                 |                 |                  |        |             |       |       | 19.2             |          | 40.3       |                               | 55.4                    |             |            |          |         | 9.86       | 1.27      |
| Streptococcus pneumoniae   | 27.6             |                 |                 |                  | 5.63   | 10.6        | 9.45  |       | 1.2              |          | 20.5       |                               |                         | 8.88        |            |          |         | 17.6       |           |
| All pathogens              | 312              | 41.3            | 68.1            | 38               | 104    | 61.7        | 109   | 34.1  | 166              | 0.013    | 70.7       | 0.179                         | 0.013                   | 55.4        | 9.13       | 0.002    | 112     | 9.55       | 0.002     |
|                            | Resistance to 1+ | Aminoglycosides | Aminopenicillin | Anti-pseudomonal | BL-BLI | Carbapenems | 3GC   | 4GC   | Fluoroquinolones | Mono INH | Macrolides | MDR in S. Typhi and Paratyphi | MDR excluding XDR in TB | Methicillin | Penicillin | Mono RIF | TMP-SMX | Vancomycin | XDR in TB |

Counts  
 < 500

# Barbados

Deaths (count) *attributable to* bacterial antimicrobial resistance by pathogen–drug combinations, 2019

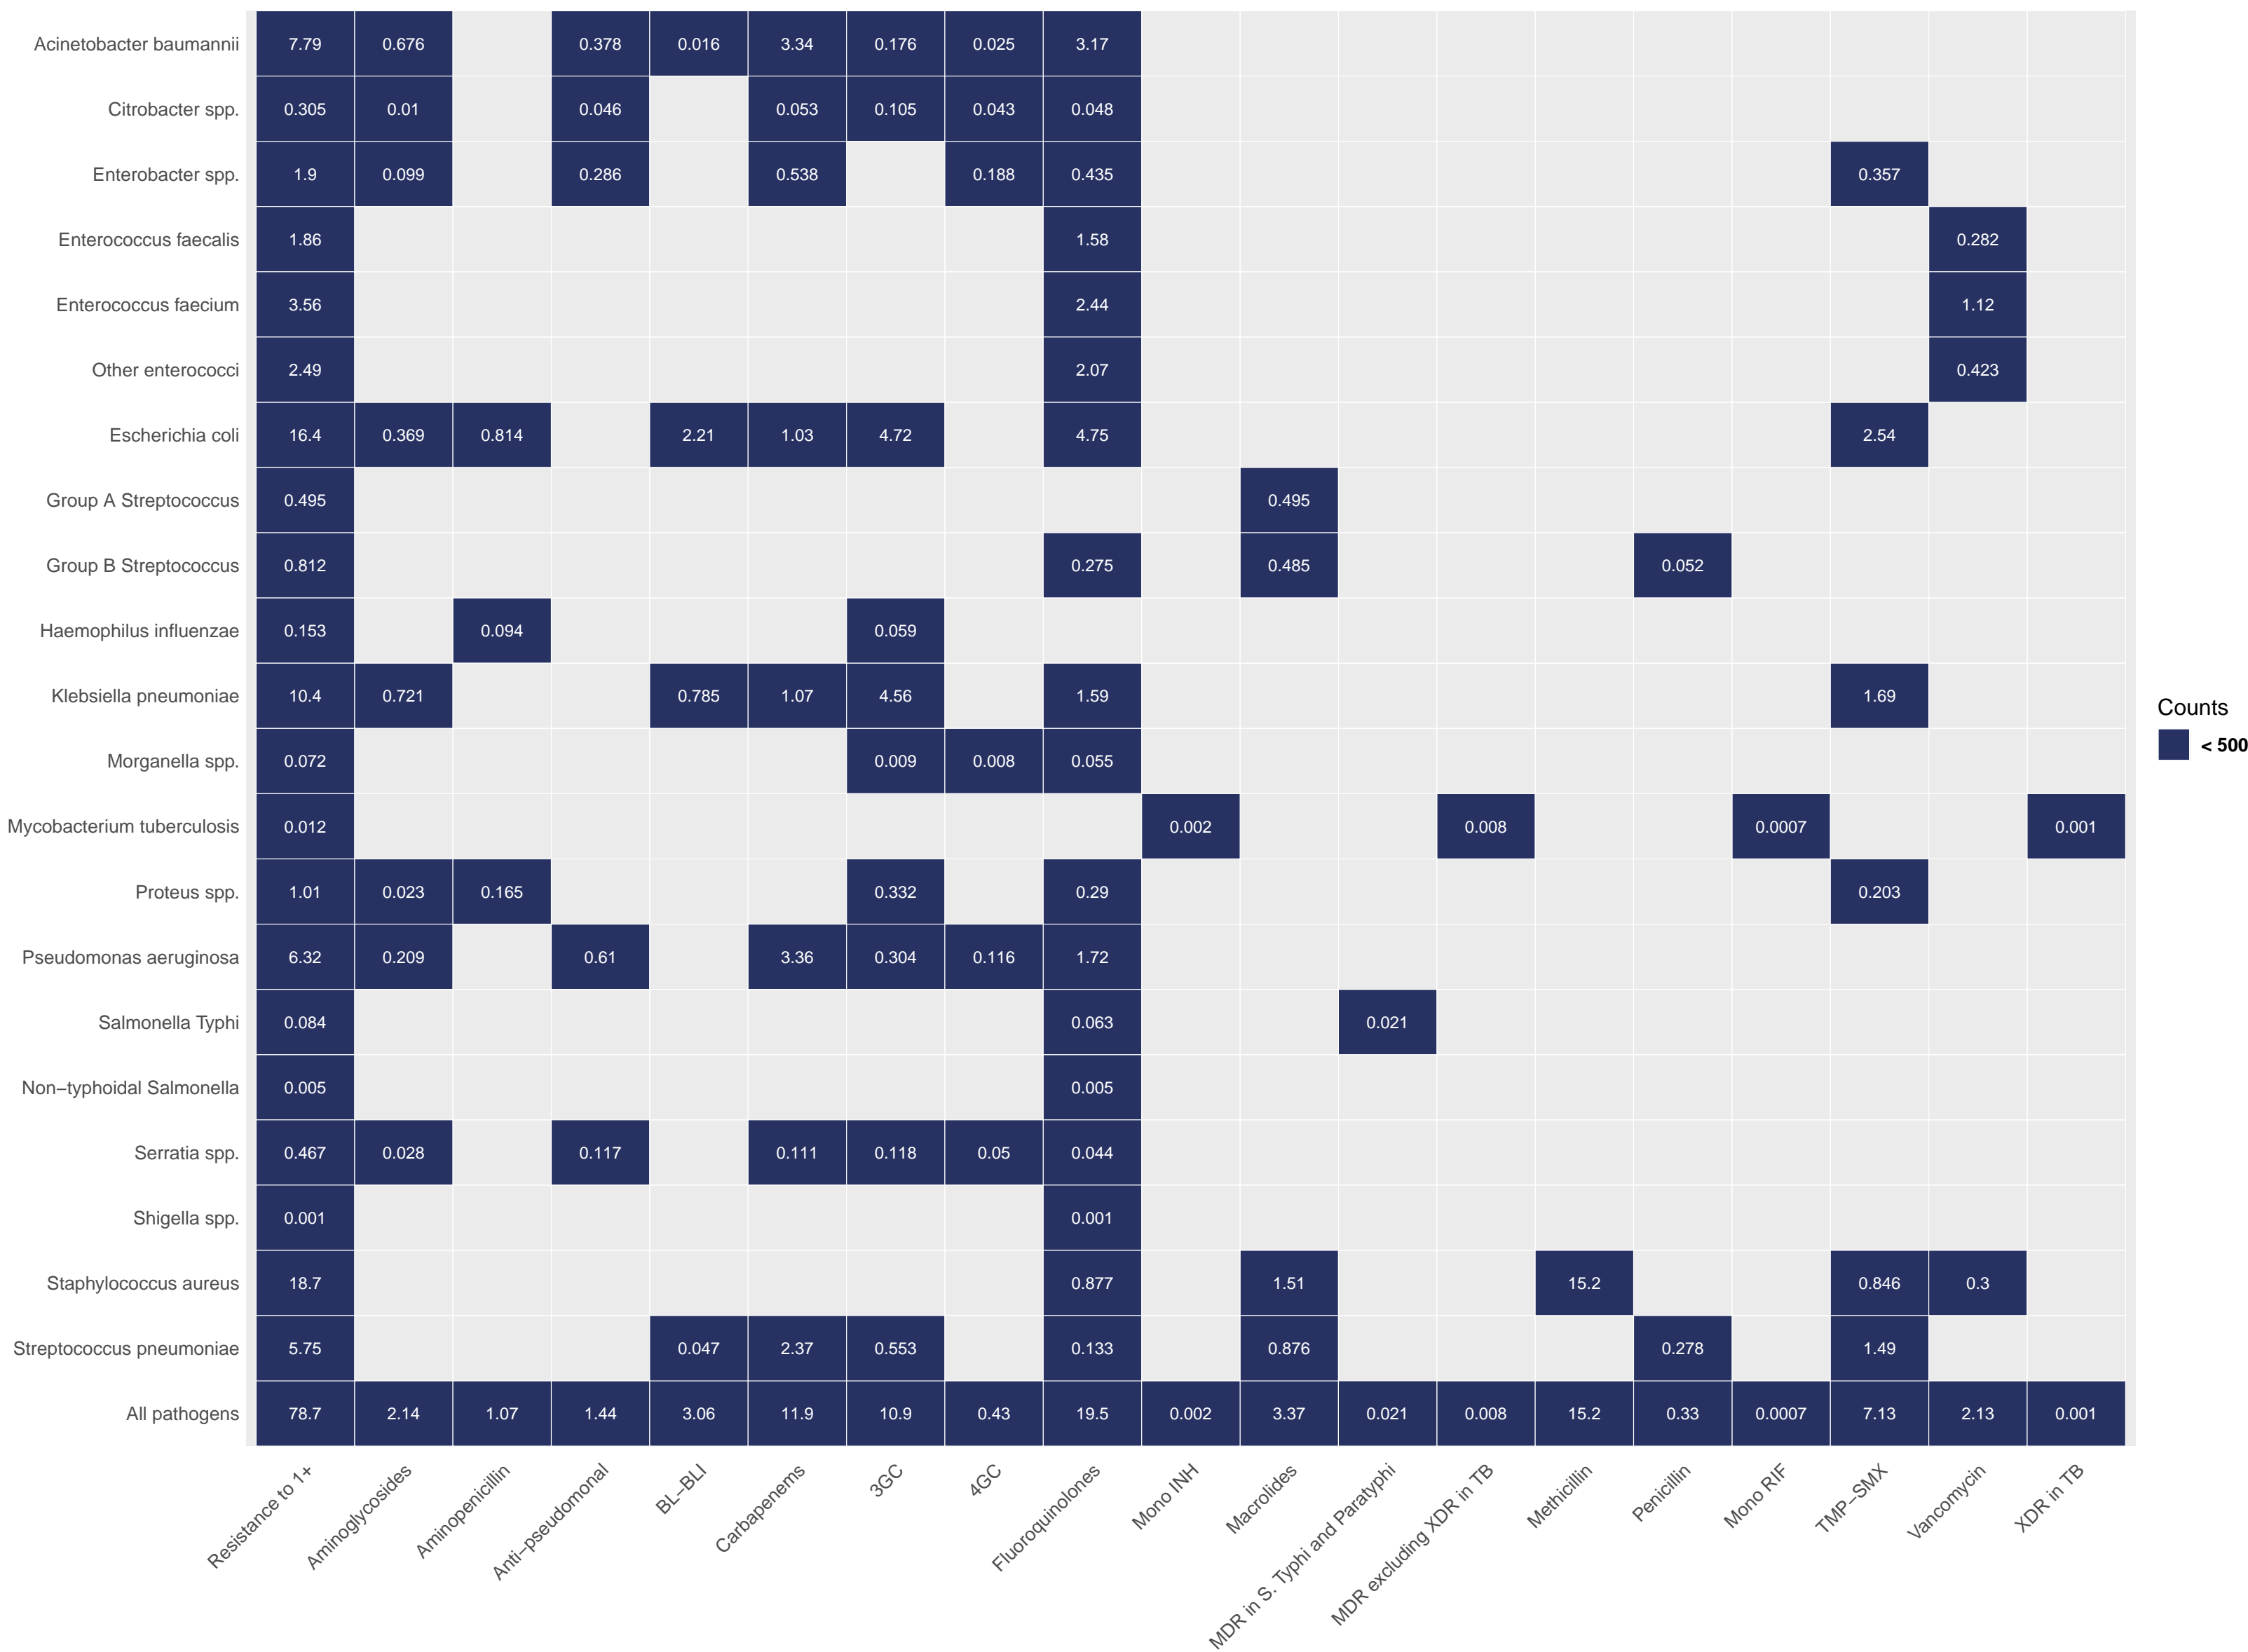

Counts  
 < 500

# Belize

Deaths (count) associated with bacterial antimicrobial resistance by pathogen–drug combinations, 2019

|                            |                  |                 |                 |                  |        |             |       |       |                  |          |            |                               |                         |             |            |          |         |            |           |
|----------------------------|------------------|-----------------|-----------------|------------------|--------|-------------|-------|-------|------------------|----------|------------|-------------------------------|-------------------------|-------------|------------|----------|---------|------------|-----------|
| Acinetobacter baumannii    | 24.5             | 15.4            |                 | 22.3             | 20.4   | 20.1        | 22.8  | 21.6  | 19.9             |          |            |                               |                         |             |            |          |         |            |           |
| Citrobacter spp.           | 1.46             | 0.102           |                 | 0.462            |        | 0.231       | 0.991 | 0.669 | 0.581            |          |            |                               |                         |             |            |          |         |            |           |
| Enterobacter spp.          | 9.64             | 1.64            |                 | 3.59             |        | 2.07        |       | 5.4   | 4.67             |          |            |                               |                         |             |            |          | 6.12    |            |           |
| Enterococcus faecalis      | 3.15             |                 |                 |                  |        |             |       |       | 2.88             |          |            |                               |                         |             |            |          |         | 0.546      |           |
| Enterococcus faecium       | 6.67             |                 |                 |                  |        |             |       |       | 6.61             |          |            |                               |                         |             |            |          |         | 2.19       |           |
| Other enterococci          | 4.23             |                 |                 |                  |        |             |       |       | 4.23             |          |            |                               |                         |             |            |          |         | 0.202      |           |
| Escherichia coli           | 25.3             | 4.87            | 24.6            |                  | 20.7   | 1.78        | 11    |       | 13.6             |          |            |                               |                         |             |            |          |         | 17.4       |           |
| Group A Streptococcus      | 1.14             |                 |                 |                  |        |             |       |       |                  |          | 1.14       |                               |                         |             |            |          |         |            |           |
| Group B Streptococcus      | 3.09             |                 |                 |                  |        |             |       |       | 0.752            |          | 2.68       |                               |                         | 0.247       |            |          |         |            |           |
| Haemophilus influenzae     | 0.359            |                 | 0.204           |                  |        |             | 0.204 |       |                  |          |            |                               |                         |             |            |          |         |            |           |
| Klebsiella pneumoniae      | 20.4             | 8.25            |                 |                  | 17.3   | 1.38        | 14.4  |       | 11.9             |          |            |                               |                         |             |            |          |         | 15.9       |           |
| Morganella spp.            | 0.128            |                 |                 |                  |        |             | 0.028 | 0.025 | 0.117            |          |            |                               |                         |             |            |          |         |            |           |
| Mycobacterium tuberculosis | 0.264            |                 |                 |                  |        |             |       |       |                  | 0.054    |            |                               | 0.151                   |             |            | 0.034    |         |            | 0.025     |
| Proteus spp.               | 2.95             | 0.175           | 2.62            |                  |        |             | 0.518 |       | 0.907            |          |            |                               |                         |             |            |          |         | 1.94       |           |
| Pseudomonas aeruginosa     | 12.2             | 5.6             |                 | 6.33             |        | 8.07        | 6.28  | 4.69  | 5.64             |          |            |                               |                         |             |            |          |         |            |           |
| Salmonella Typhi           | 0.357            |                 |                 |                  |        |             |       |       | 0.312            |          |            | 0.054                         |                         |             |            |          |         |            |           |
| Non-typhoidal Salmonella   | 0.02             |                 |                 |                  |        |             |       |       | 0.02             |          |            |                               |                         |             |            |          |         |            |           |
| Serratia spp.              | 1.73             | 0.553           |                 | 0.567            |        | 0.452       | 1.05  | 0.549 | 0.618            |          |            |                               |                         |             |            |          |         |            |           |
| Shigella spp.              | 0.027            |                 |                 |                  |        |             |       |       | 0.027            |          |            |                               |                         |             |            |          |         |            |           |
| Staphylococcus aureus      | 20               |                 |                 |                  |        |             |       |       | 6.7              |          | 11.6       |                               | 17                      |             |            |          | 4.04    | 0.354      |           |
| Streptococcus pneumoniae   | 20.3             |                 |                 |                  | 4.46   | 5.28        | 3.37  |       | 1.09             |          | 9.6        |                               |                         | 9.08        |            |          | 16.1    |            |           |
| All pathogens              | 158              | 36.6            | 27.4            | 33.3             | 62.9   | 39.3        | 60.6  | 33    | 80.5             | 0.054    | 25.1       | 0.054                         | 0.151                   | 17          | 9.32       | 0.034    | 61.5    | 3.29       | 0.025     |
|                            | Resistance to 1+ | Aminoglycosides | Aminopenicillin | Anti-pseudomonal | BL-BLI | Carbapenems | 3GC   | 4GC   | Fluoroquinolones | Mono INH | Macrolides | MDR in S. Typhi and Paratyphi | MDR excluding XDR in TB | Methicillin | Penicillin | Mono RIF | TMP-SMX | Vancomycin | XDR in TB |

Counts

< 500

# Belize

Deaths (count) *attributable to* bacterial antimicrobial resistance by pathogen–drug combinations, 2019

|                            |                  |                 |                 |                  |        |             |       |       |                  |          |            |                               |                         |             |            |          |         |            |           |
|----------------------------|------------------|-----------------|-----------------|------------------|--------|-------------|-------|-------|------------------|----------|------------|-------------------------------|-------------------------|-------------|------------|----------|---------|------------|-----------|
| Acinetobacter baumannii    | 7.72             | 0.652           |                 | 0.667            | 0.061  | 3.38        | 0.406 | 0.089 | 2.47             |          |            |                               |                         |             |            |          |         |            |           |
| Citrobacter spp.           | 0.413            | 0.005           |                 | 0.092            |        | 0.057       | 0.093 | 0.072 | 0.095            |          |            |                               |                         |             |            |          |         |            |           |
| Enterobacter spp.          | 2.2              | 0.096           |                 | 0.363            |        | 0.474       |       | 0.347 | 0.554            |          |            |                               |                         |             |            |          | 0.362   |            |           |
| Enterococcus faecalis      | 0.882            |                 |                 |                  |        |             |       |       | 0.706            |          |            |                               |                         |             |            |          |         | 0.176      |           |
| Enterococcus faecium       | 1.75             |                 |                 |                  |        |             |       |       | 1.24             |          |            |                               |                         |             |            |          |         | 0.509      |           |
| Other enterococci          | 0.862            |                 |                 |                  |        |             |       |       | 0.826            |          |            |                               |                         |             |            |          |         | 0.036      |           |
| Escherichia coli           | 6.08             | 0.297           | 0.327           |                  | 1.15   | 0.394       | 1.47  |       | 1.4              |          |            |                               |                         |             |            |          |         | 1.04       |           |
| Group A Streptococcus      | 0.11             |                 |                 |                  |        |             |       |       |                  |          | 0.11       |                               |                         |             |            |          |         |            |           |
| Group B Streptococcus      | 0.442            |                 |                 |                  |        |             |       |       | 0.128            |          | 0.268      |                               |                         | 0.046       |            |          |         |            |           |
| Haemophilus influenzae     | 0.09             |                 | 0.029           |                  |        |             | 0.06  |       |                  |          |            |                               |                         |             |            |          |         |            |           |
| Klebsiella pneumoniae      | 5.14             | 0.623           |                 |                  | 0.489  | 0.38        | 2.02  |       | 0.799            |          |            |                               |                         |             |            |          |         | 0.827      |           |
| Morganella spp.            | 0.029            |                 |                 |                  |        |             | 0.003 | 0.004 | 0.022            |          |            |                               |                         |             |            |          |         |            |           |
| Mycobacterium tuberculosis | 0.124            |                 |                 |                  |        |             |       |       |                  | 0.009    |            |                               | 0.09                    |             |            | 0.01     |         |            | 0.015     |
| Proteus spp.               | 0.342            | 0.011           | 0.062           |                  |        |             | 0.124 |       | 0.065            |          |            |                               |                         |             |            |          |         | 0.08       |           |
| Pseudomonas aeruginosa     | 2.94             | 0.153           |                 | 0.439            |        | 1.48        | 0.226 | 0.066 | 0.581            |          |            |                               |                         |             |            |          |         |            |           |
| Salmonella Typhi           | 0.071            |                 |                 |                  |        |             |       |       | 0.064            |          |            | 0.007                         |                         |             |            |          |         |            |           |
| Non-typhoidal Salmonella   | 0.004            |                 |                 |                  |        |             |       |       | 0.004            |          |            |                               |                         |             |            |          |         |            |           |
| Serratia spp.              | 0.433            | 0.032           |                 | 0.104            |        | 0.119       | 0.07  | 0.038 | 0.069            |          |            |                               |                         |             |            |          |         |            |           |
| Shigella spp.              | 0.006            |                 |                 |                  |        |             |       |       | 0.006            |          |            |                               |                         |             |            |          |         |            |           |
| Staphylococcus aureus      | 5.79             |                 |                 |                  |        |             |       |       | 0.301            |          | 0.435      |                               |                         | 4.6         |            |          |         | 0.361      | 0.09      |
| Streptococcus pneumoniae   | 4.02             |                 |                 |                  | 0.126  | 1.14        | 0.149 |       | 0.129            |          | 0.38       |                               |                         | 0.618       |            |          |         | 1.47       |           |
| All pathogens              | 39.4             | 1.87            | 0.418           | 1.67             | 1.82   | 7.42        | 4.63  | 0.617 | 9.45             | 0.009    | 1.19       | 0.007                         | 0.09                    | 4.6         | 0.664      | 0.01     | 4.14    | 0.812      | 0.015     |
|                            | Resistance to 1+ | Aminoglycosides | Aminopenicillin | Anti-pseudomonal | BL-BLI | Carbapenems | 3GC   | 4GC   | Fluoroquinolones | Mono INH | Macrolides | MDR in S. Typhi and Paratyphi | MDR excluding XDR in TB | Methicillin | Penicillin | Mono RIF | TMP-SMX | Vancomycin | XDR in TB |

Counts

< 500

# Bolivia

Deaths (count) associated with bacterial antimicrobial resistance by pathogen–drug combinations, 2019

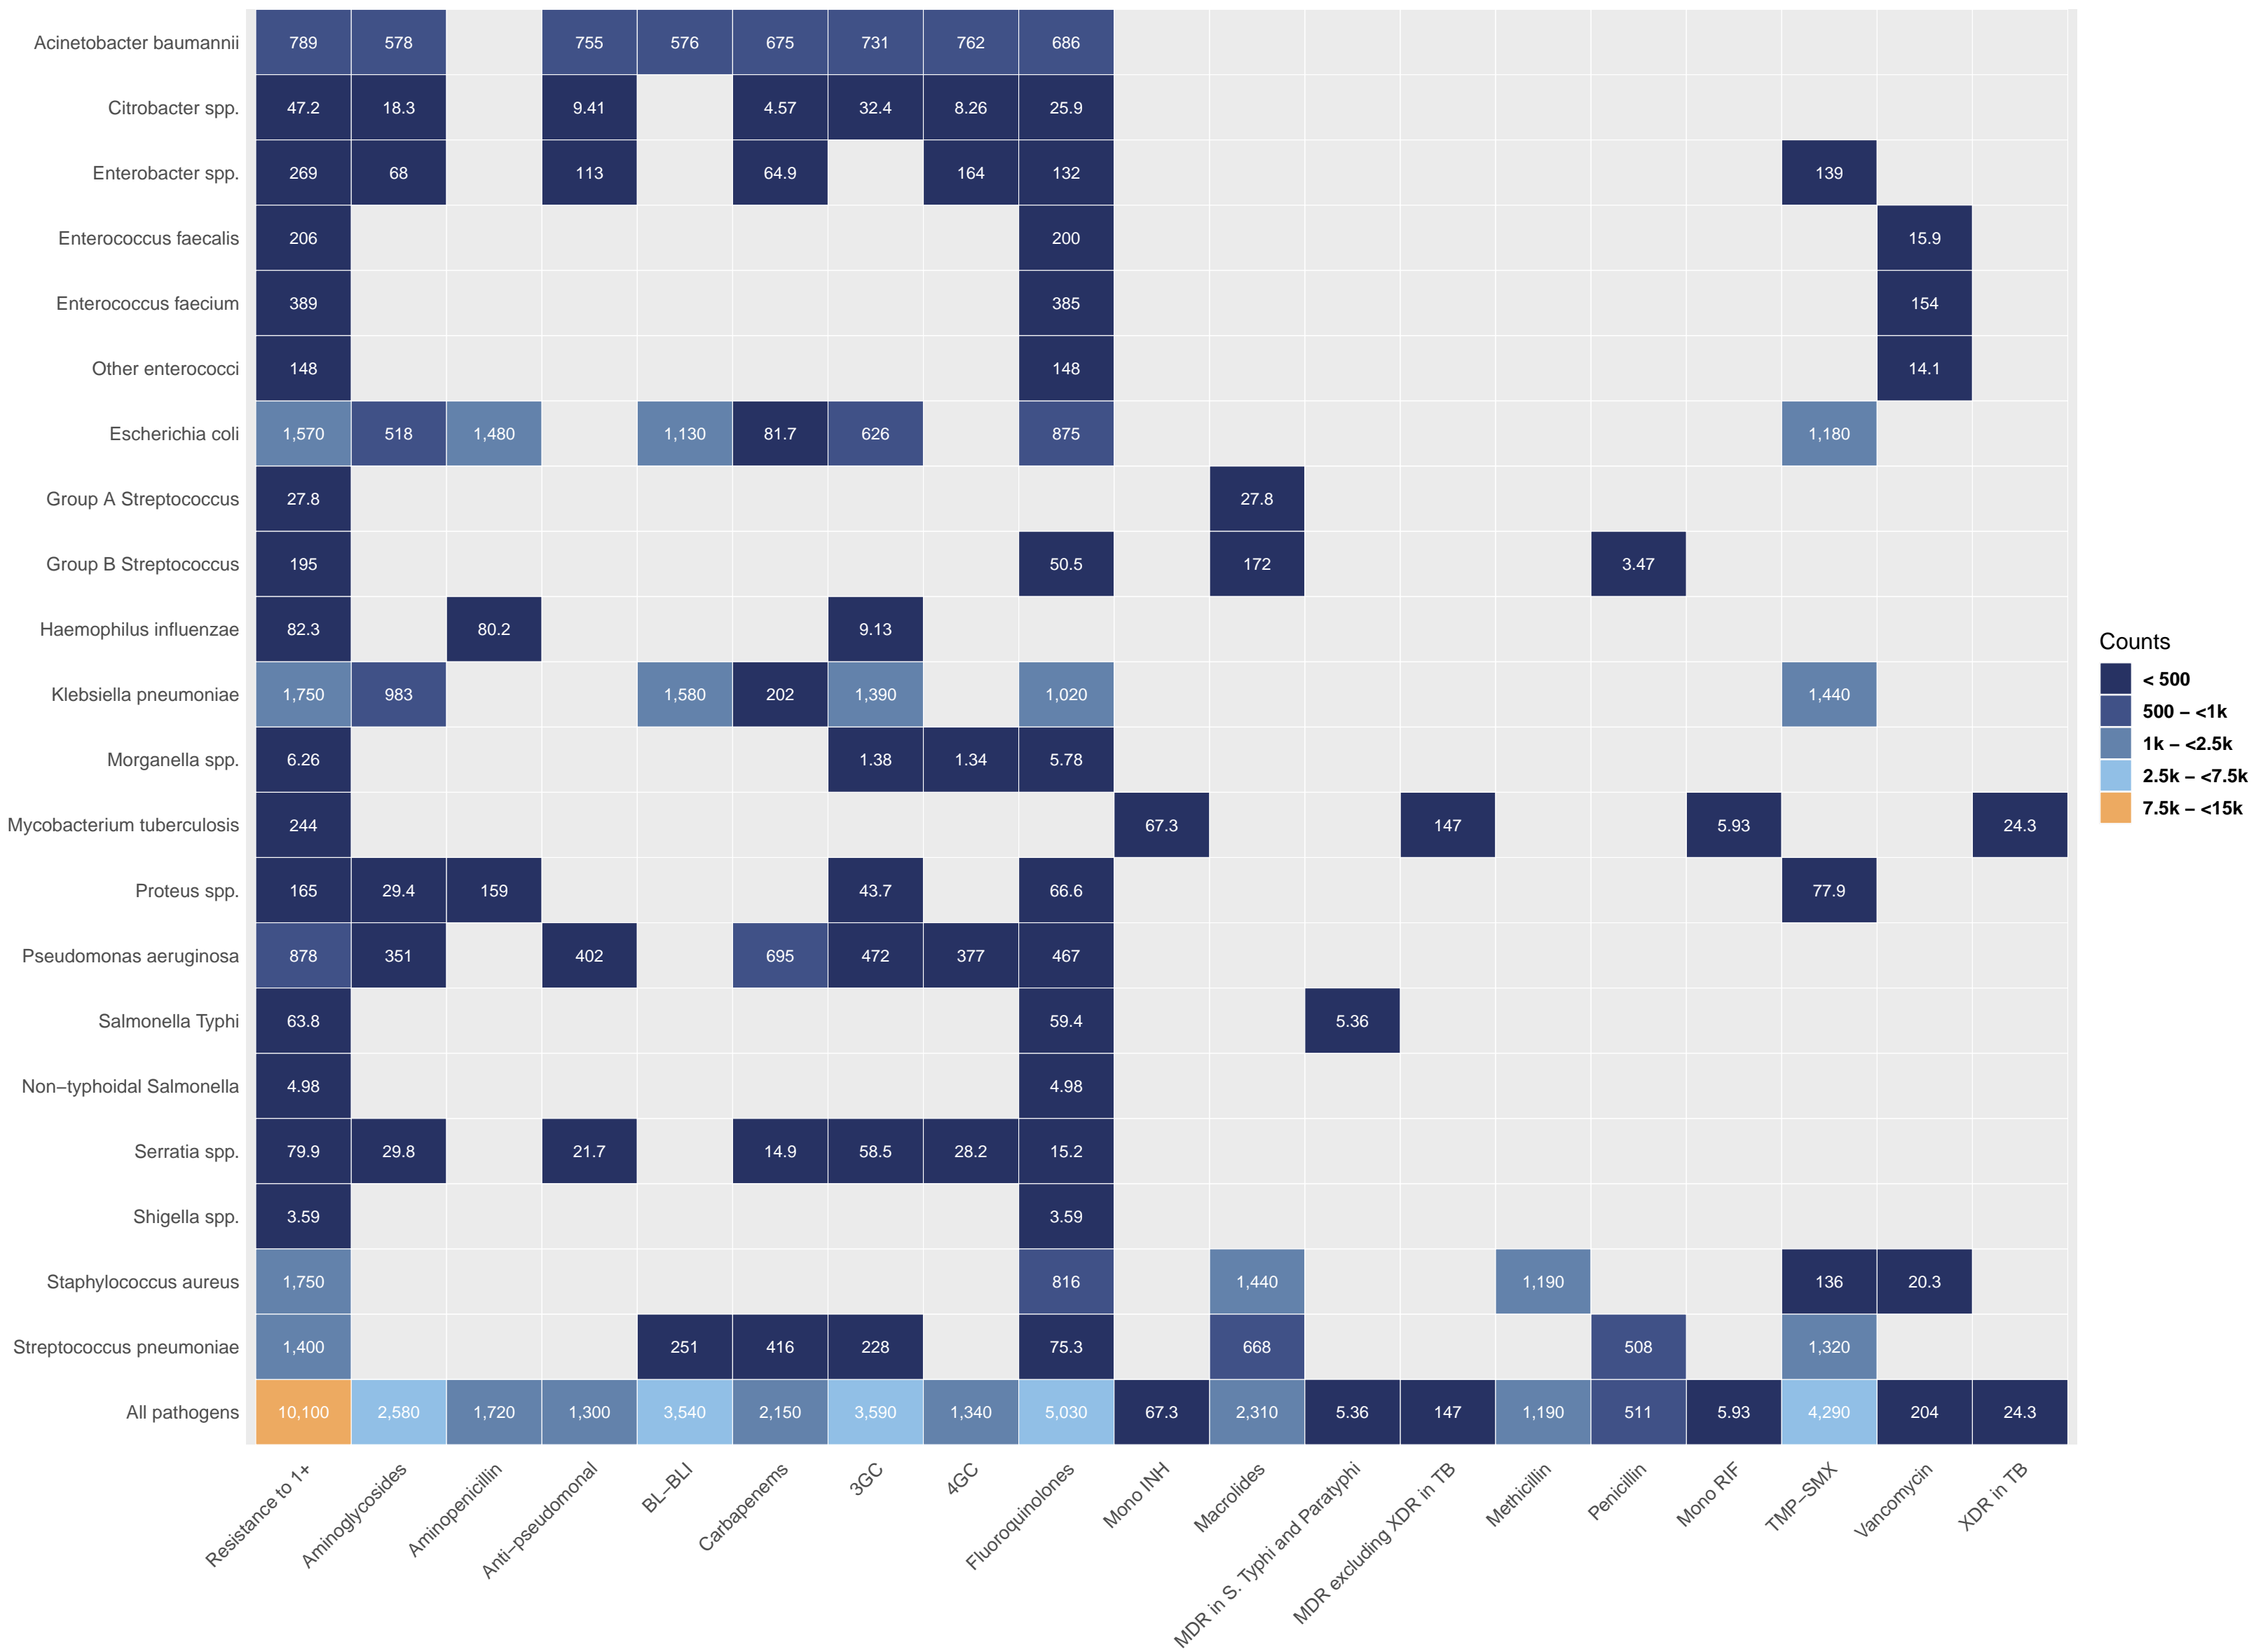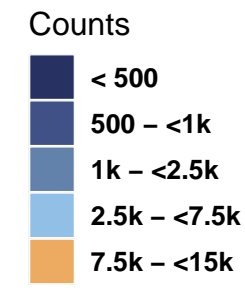

# Bolivia

Deaths (count) *attributable to* bacterial antimicrobial resistance by pathogen–drug combinations, 2019

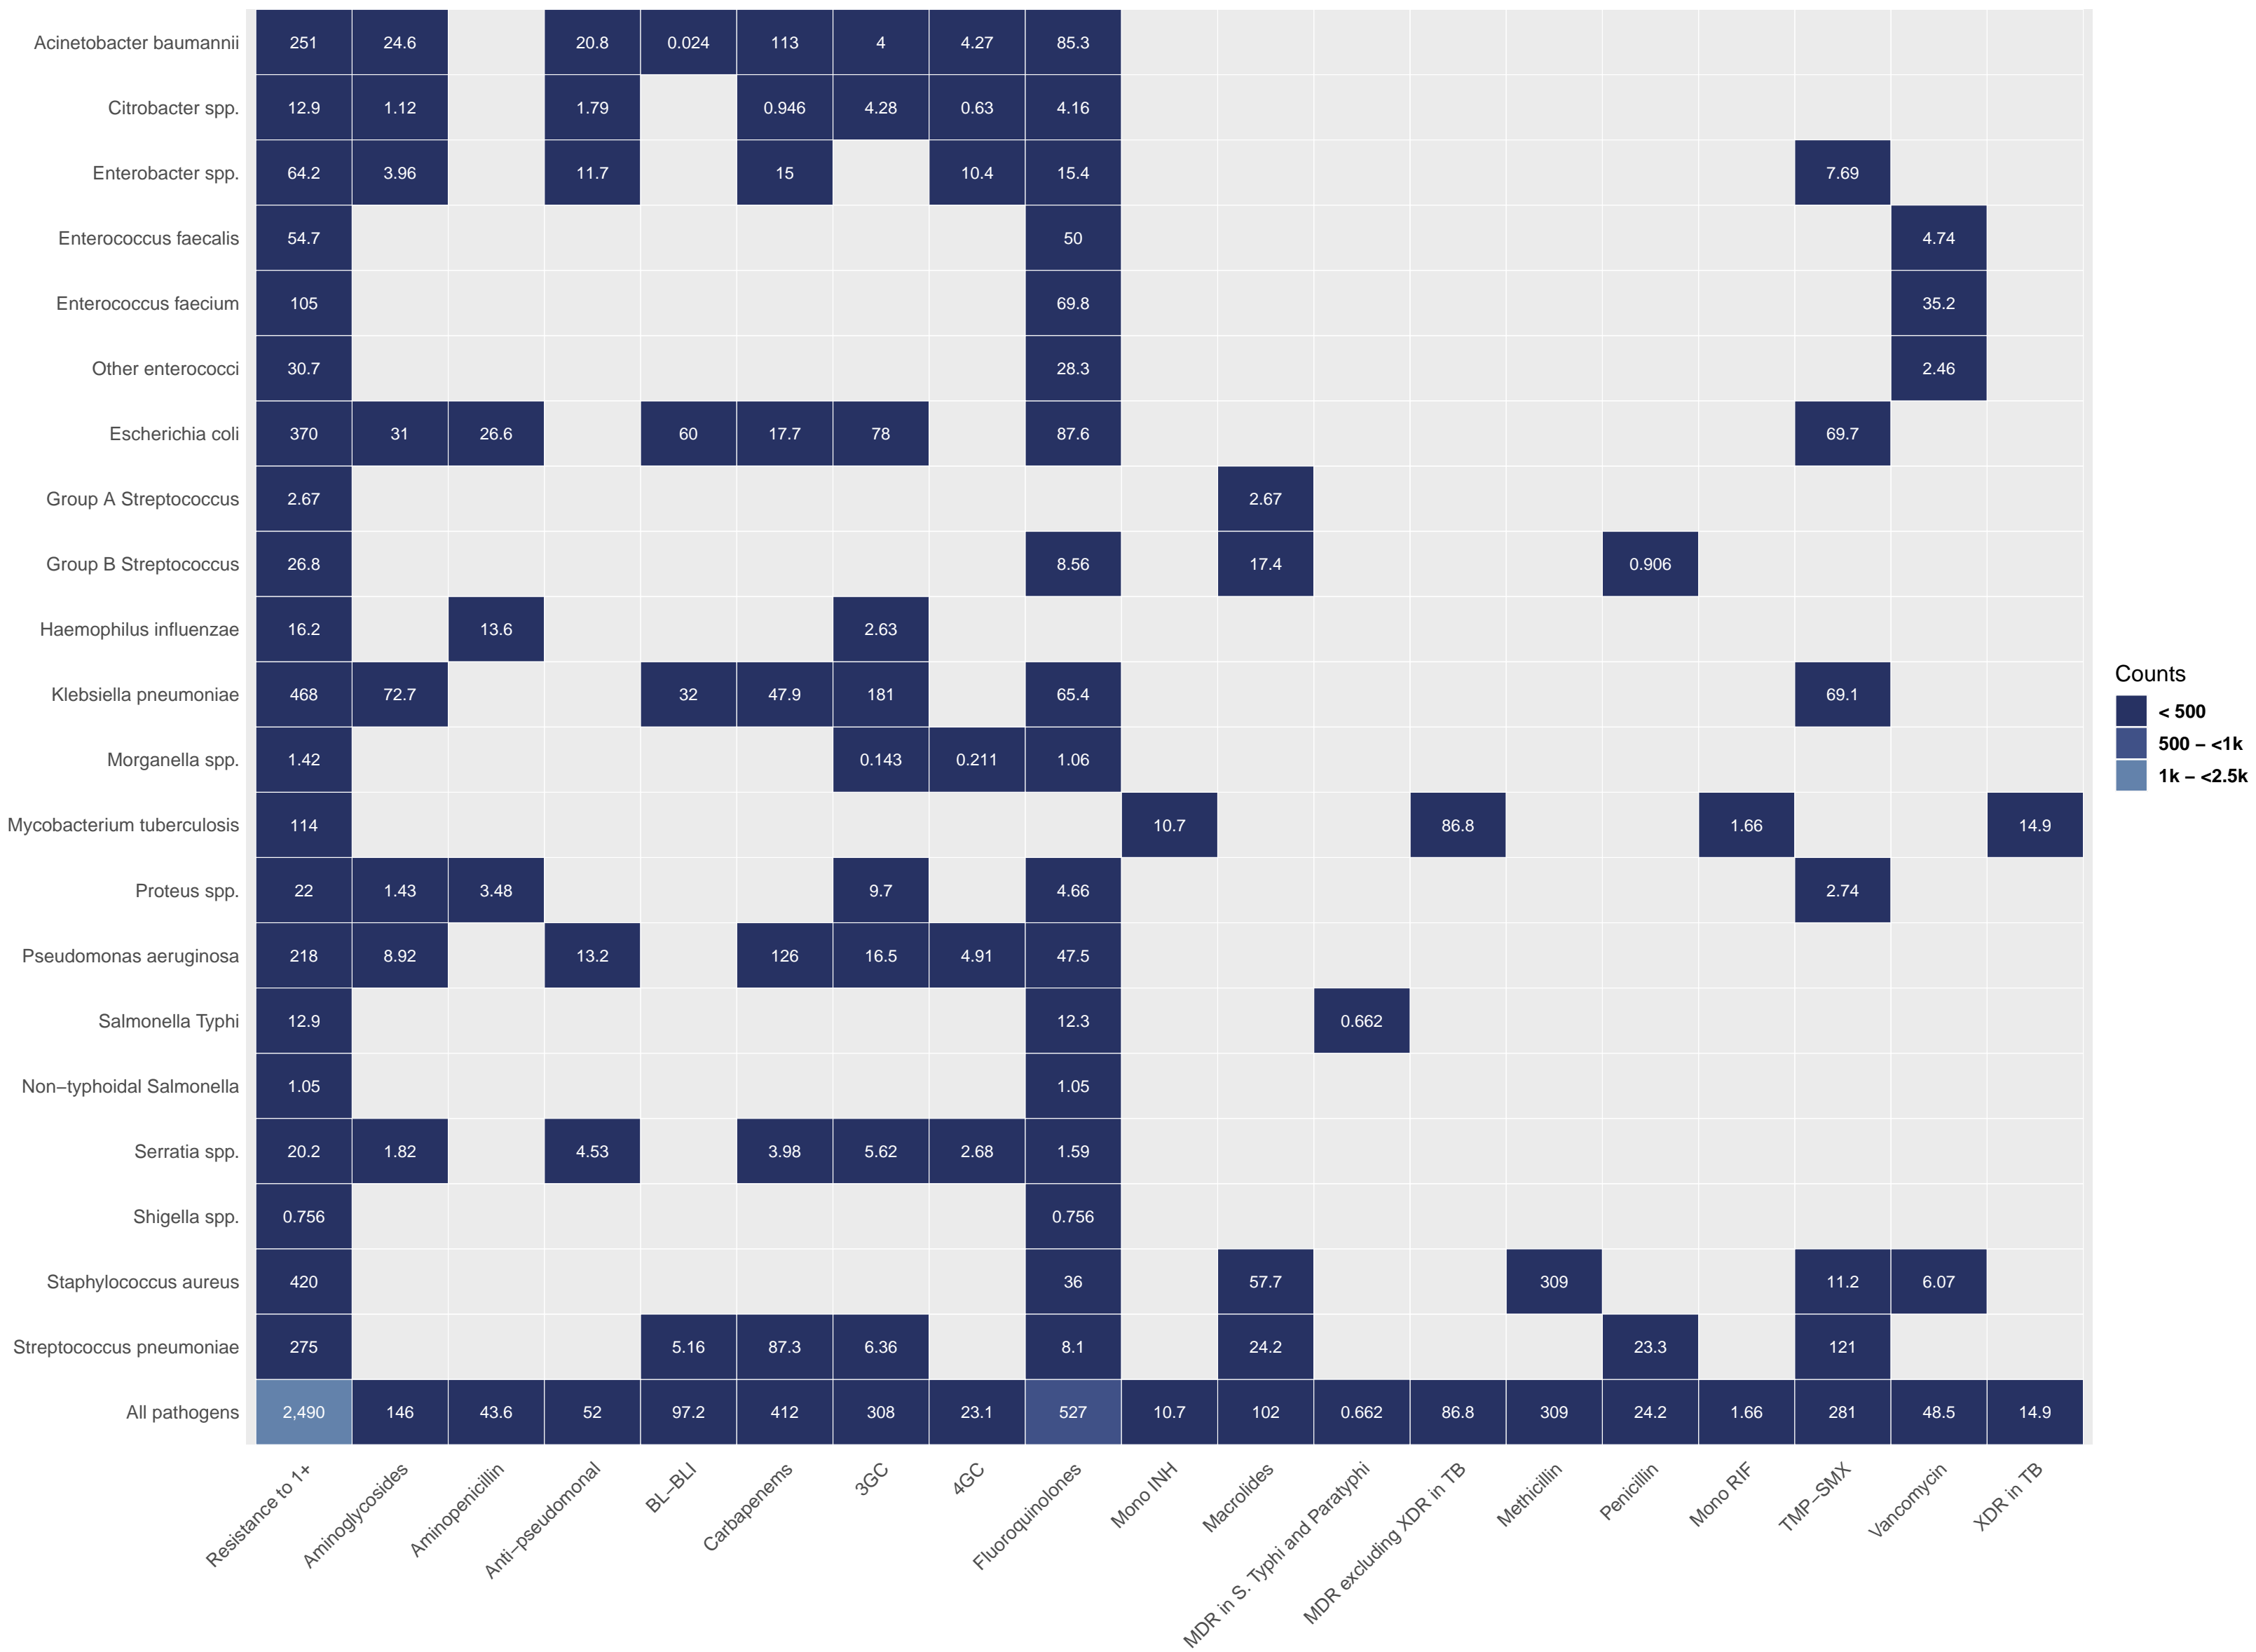

Counts

- < 500
- 500 – <1k
- 1k – <2.5k

# Brazil

Deaths (count) associated with bacterial antimicrobial resistance by pathogen–drug combinations, 2019

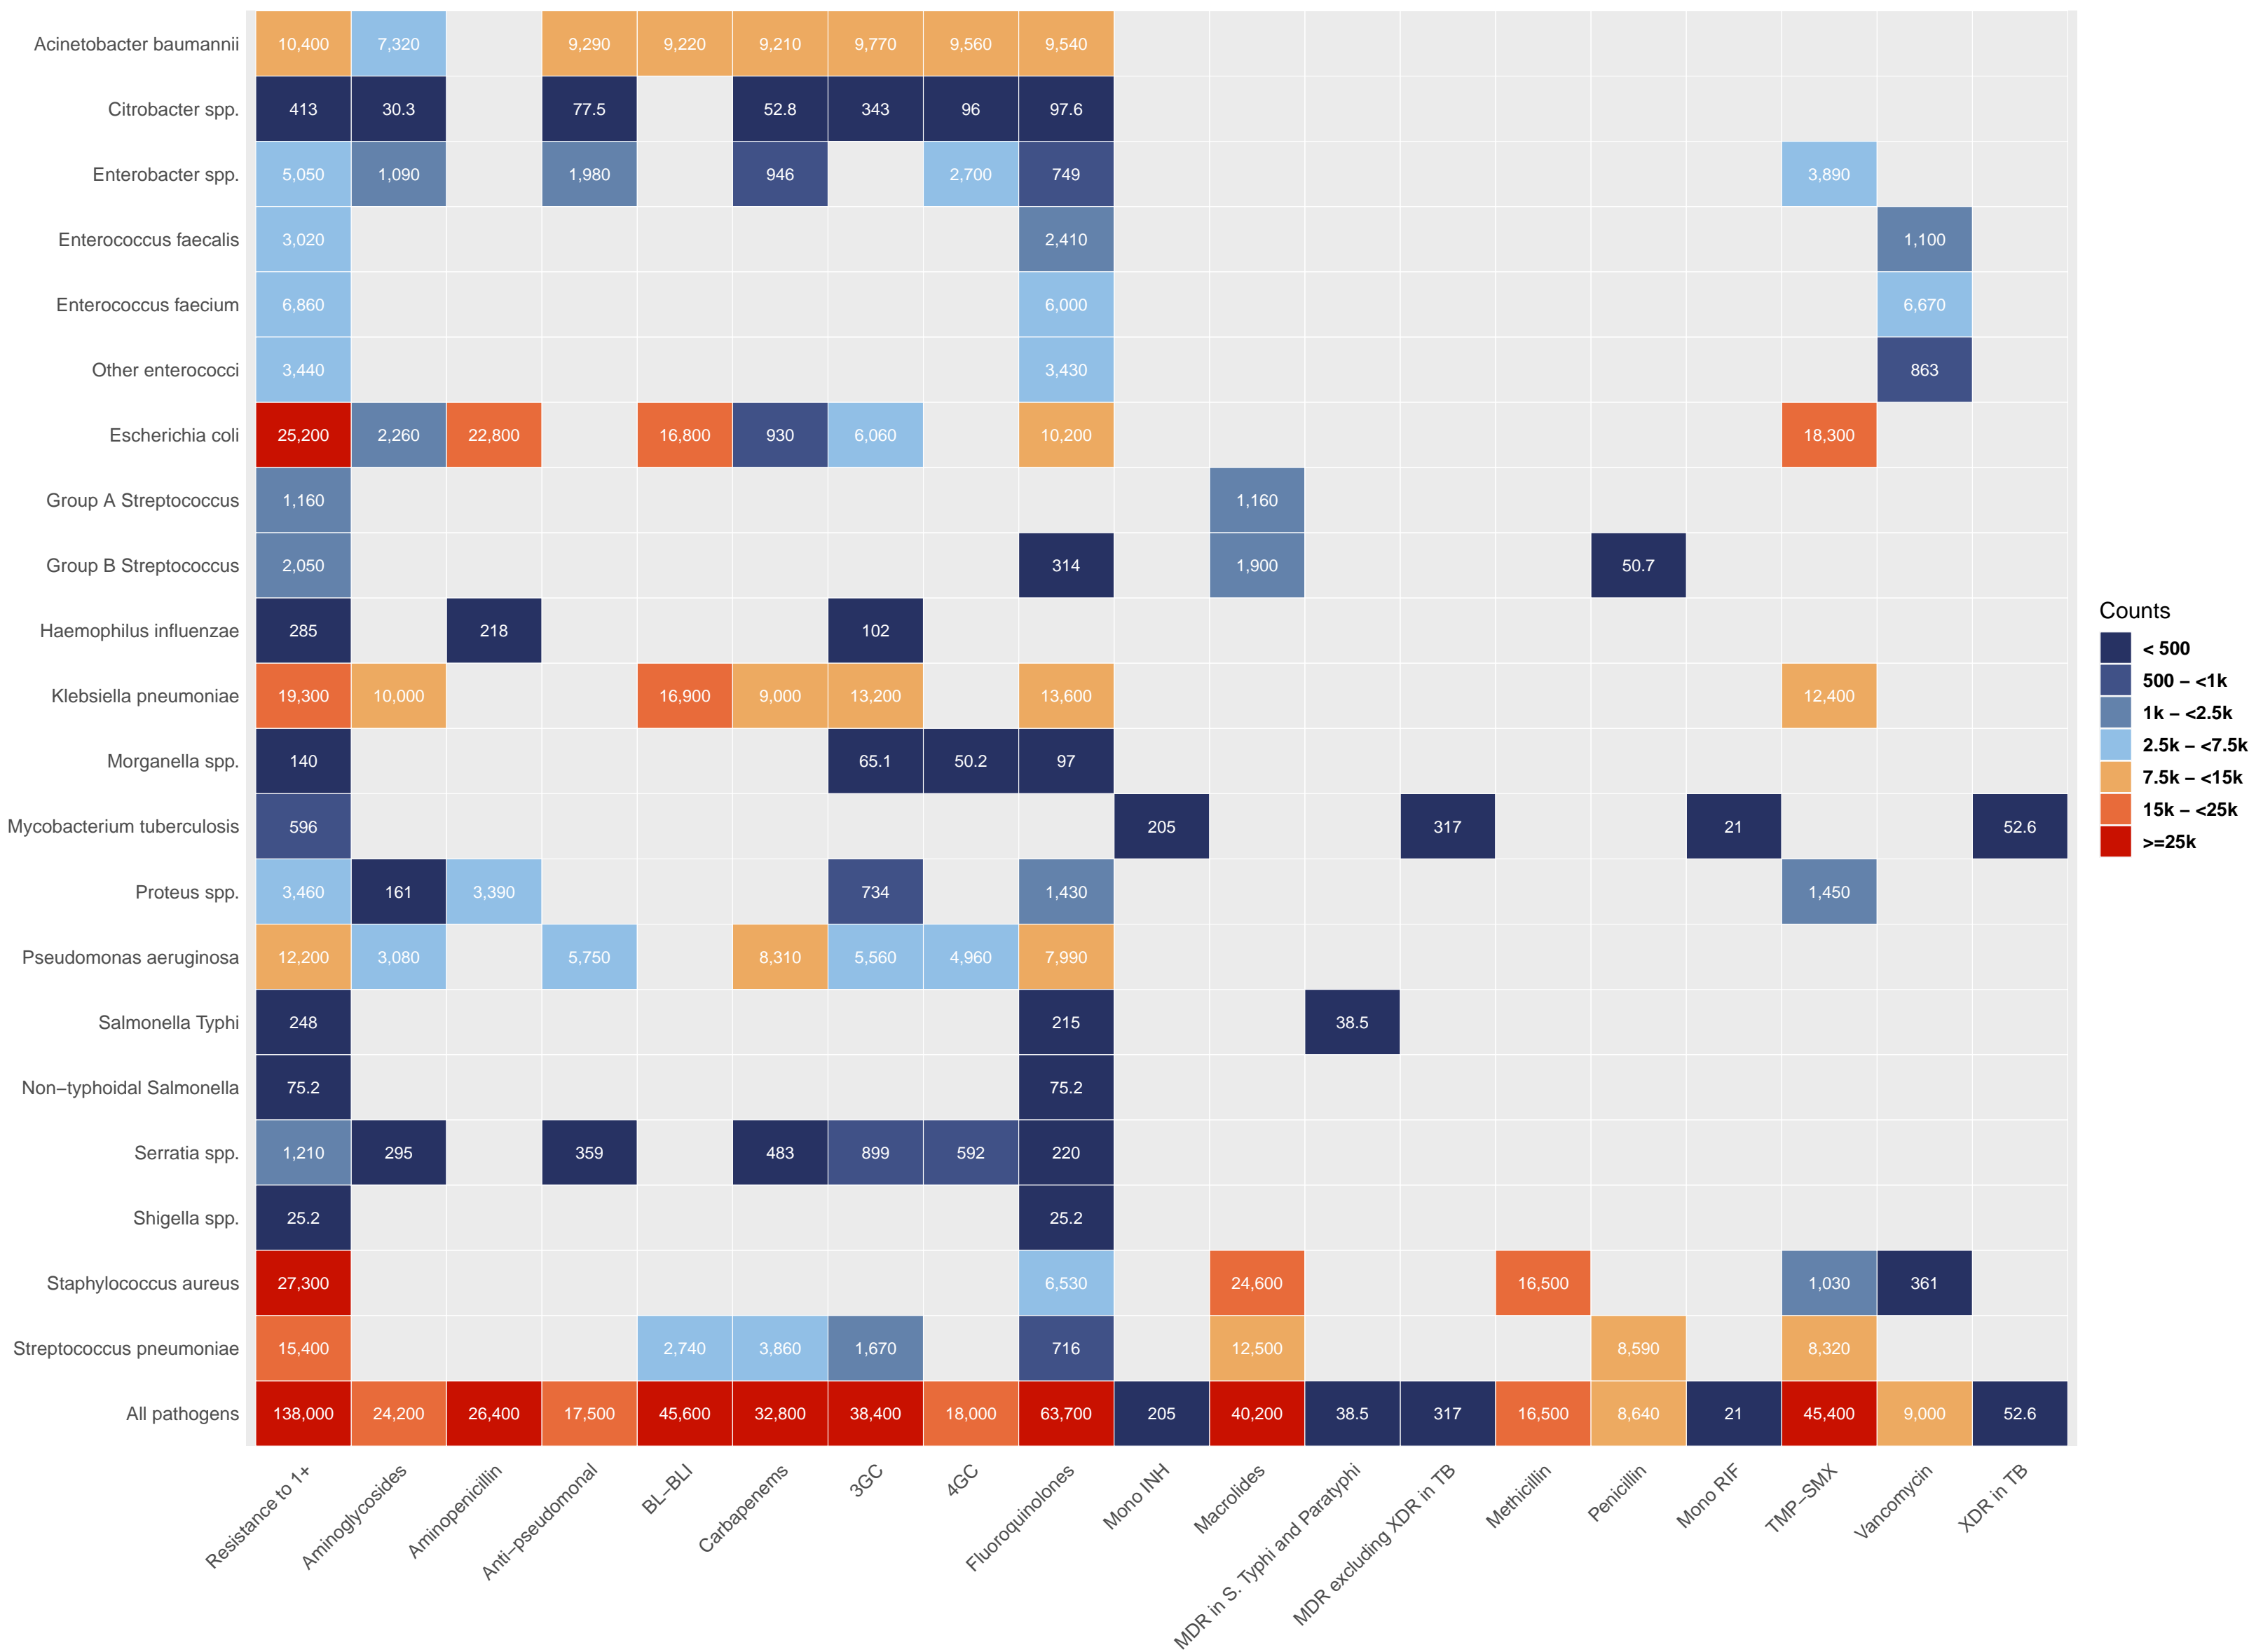



# Brazil

Deaths (count) *attributable to* bacterial antimicrobial resistance by pathogen–drug combinations, 2019

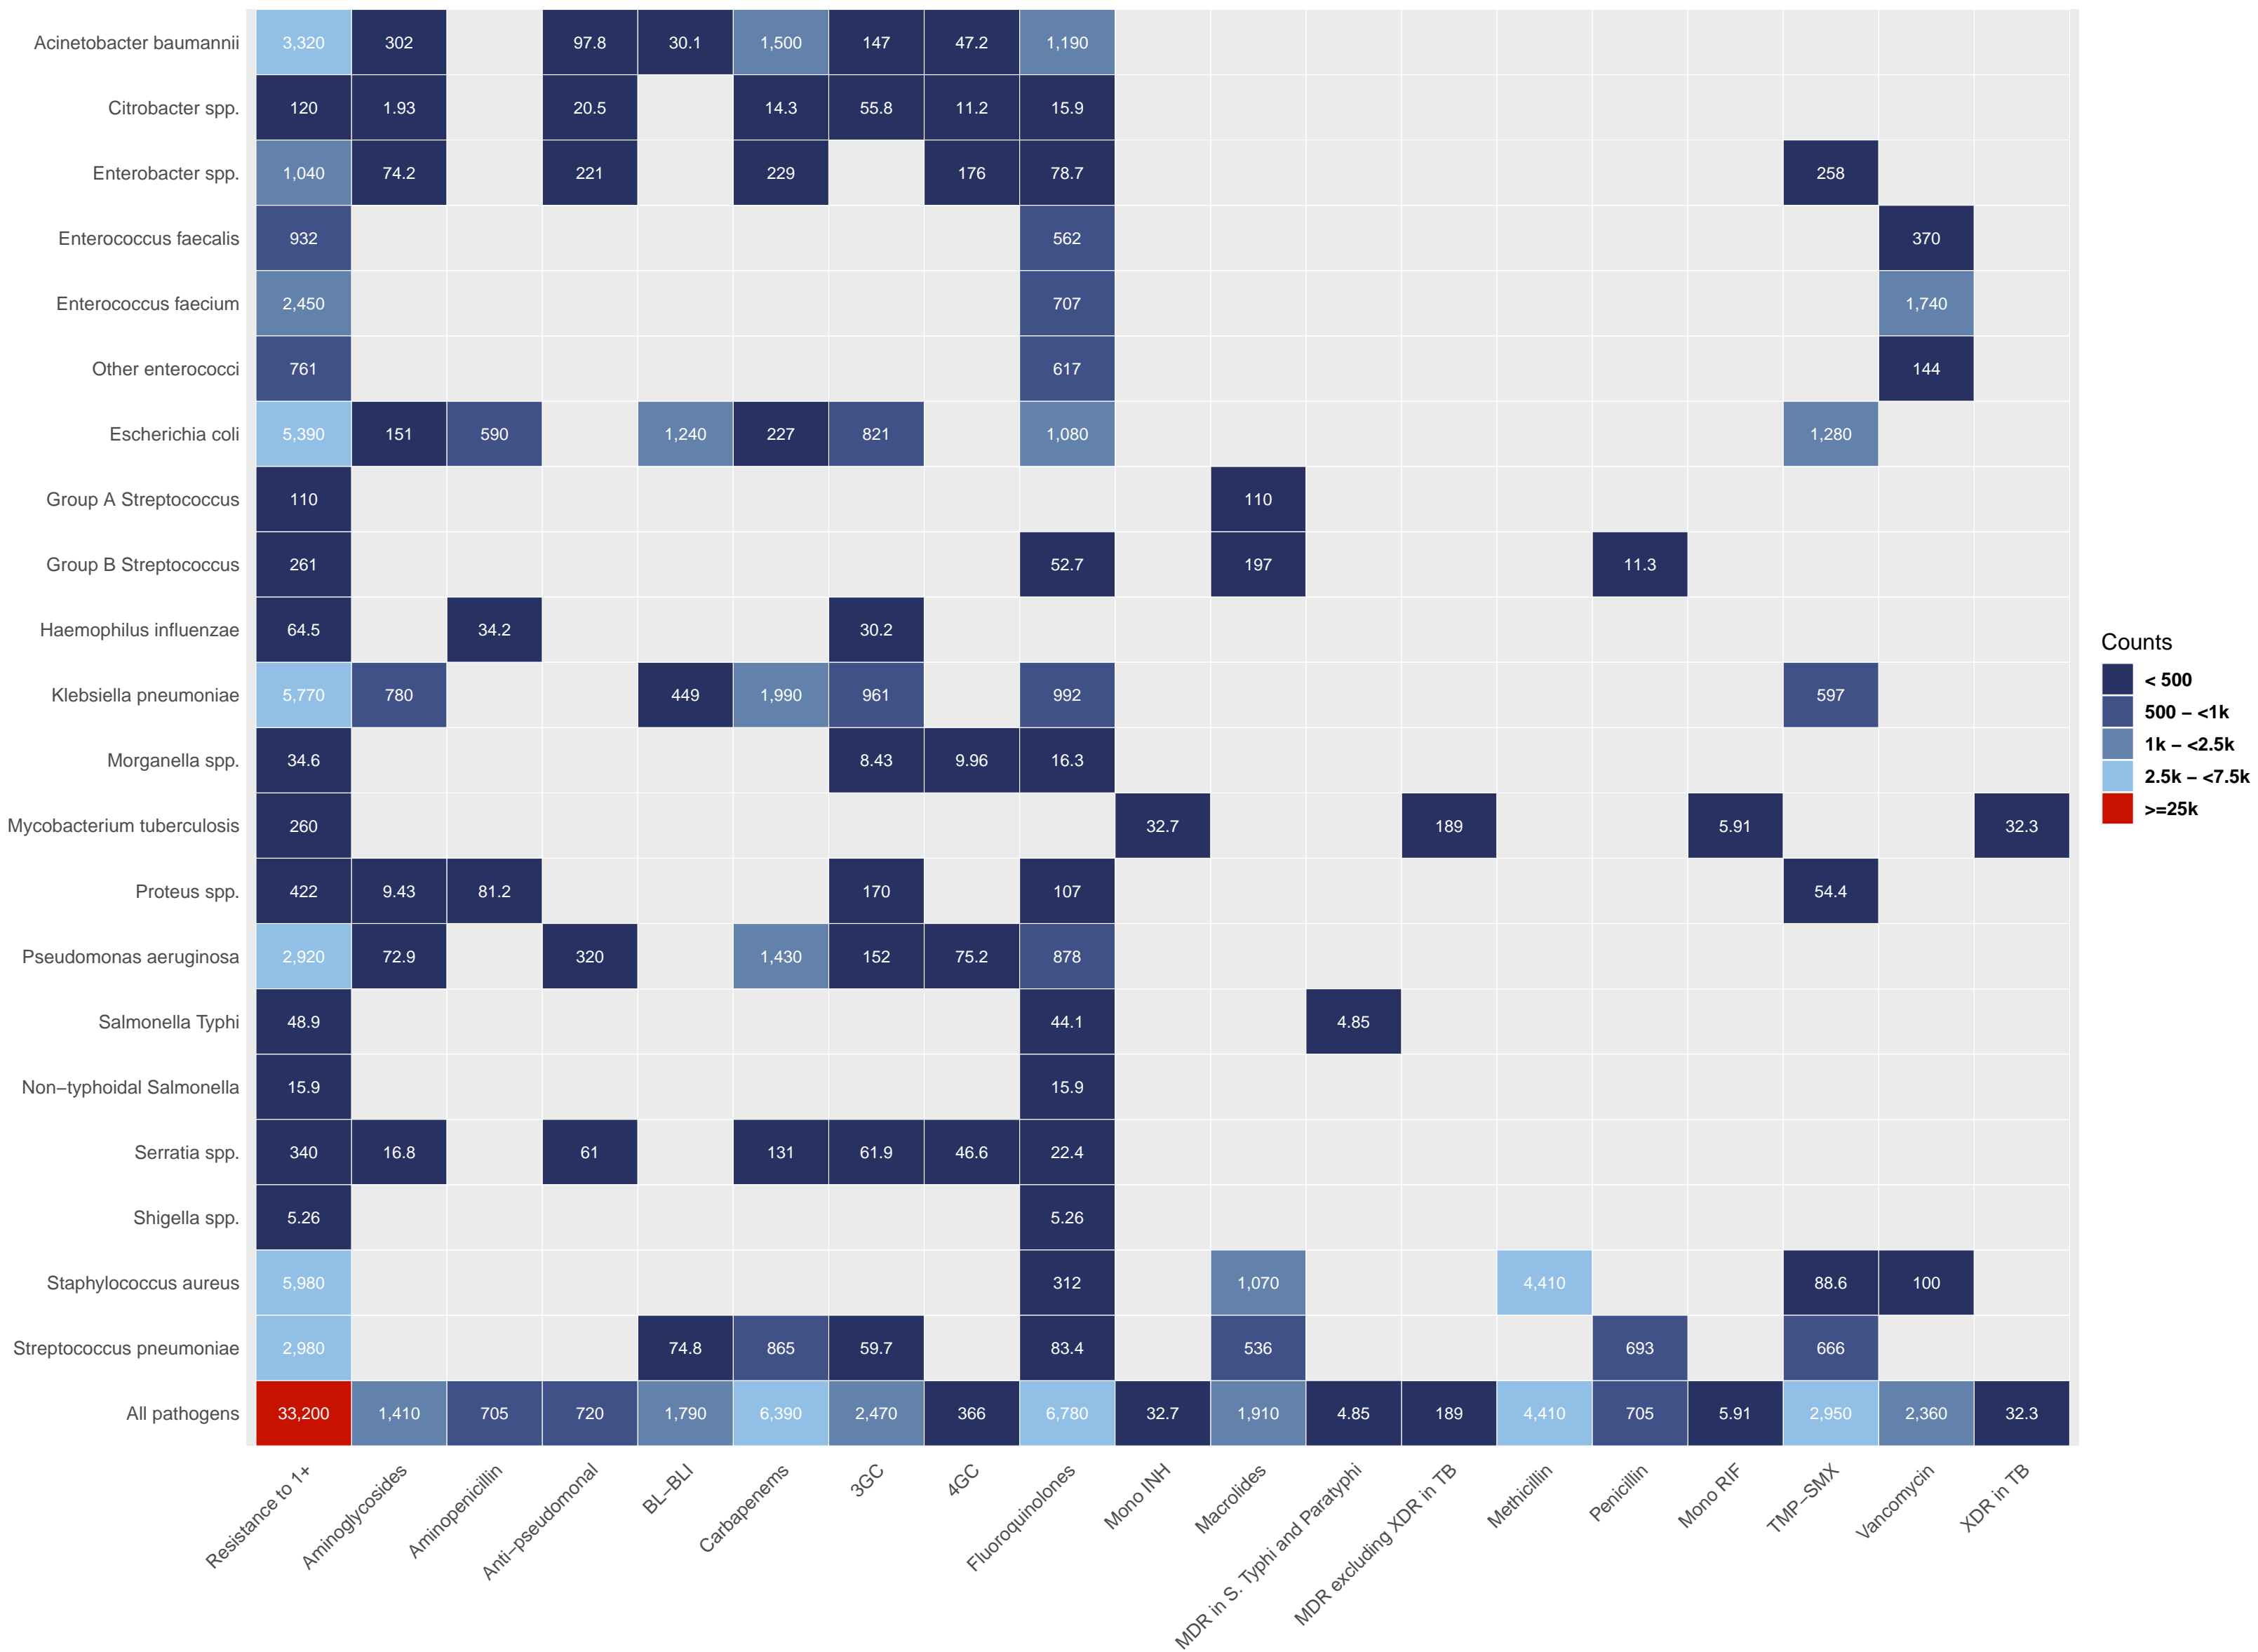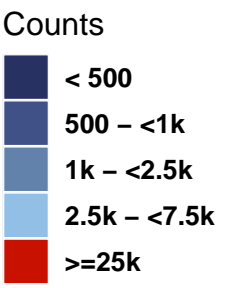

# Canada

Deaths (count) associated with bacterial antimicrobial resistance by pathogen–drug combinations, 2019

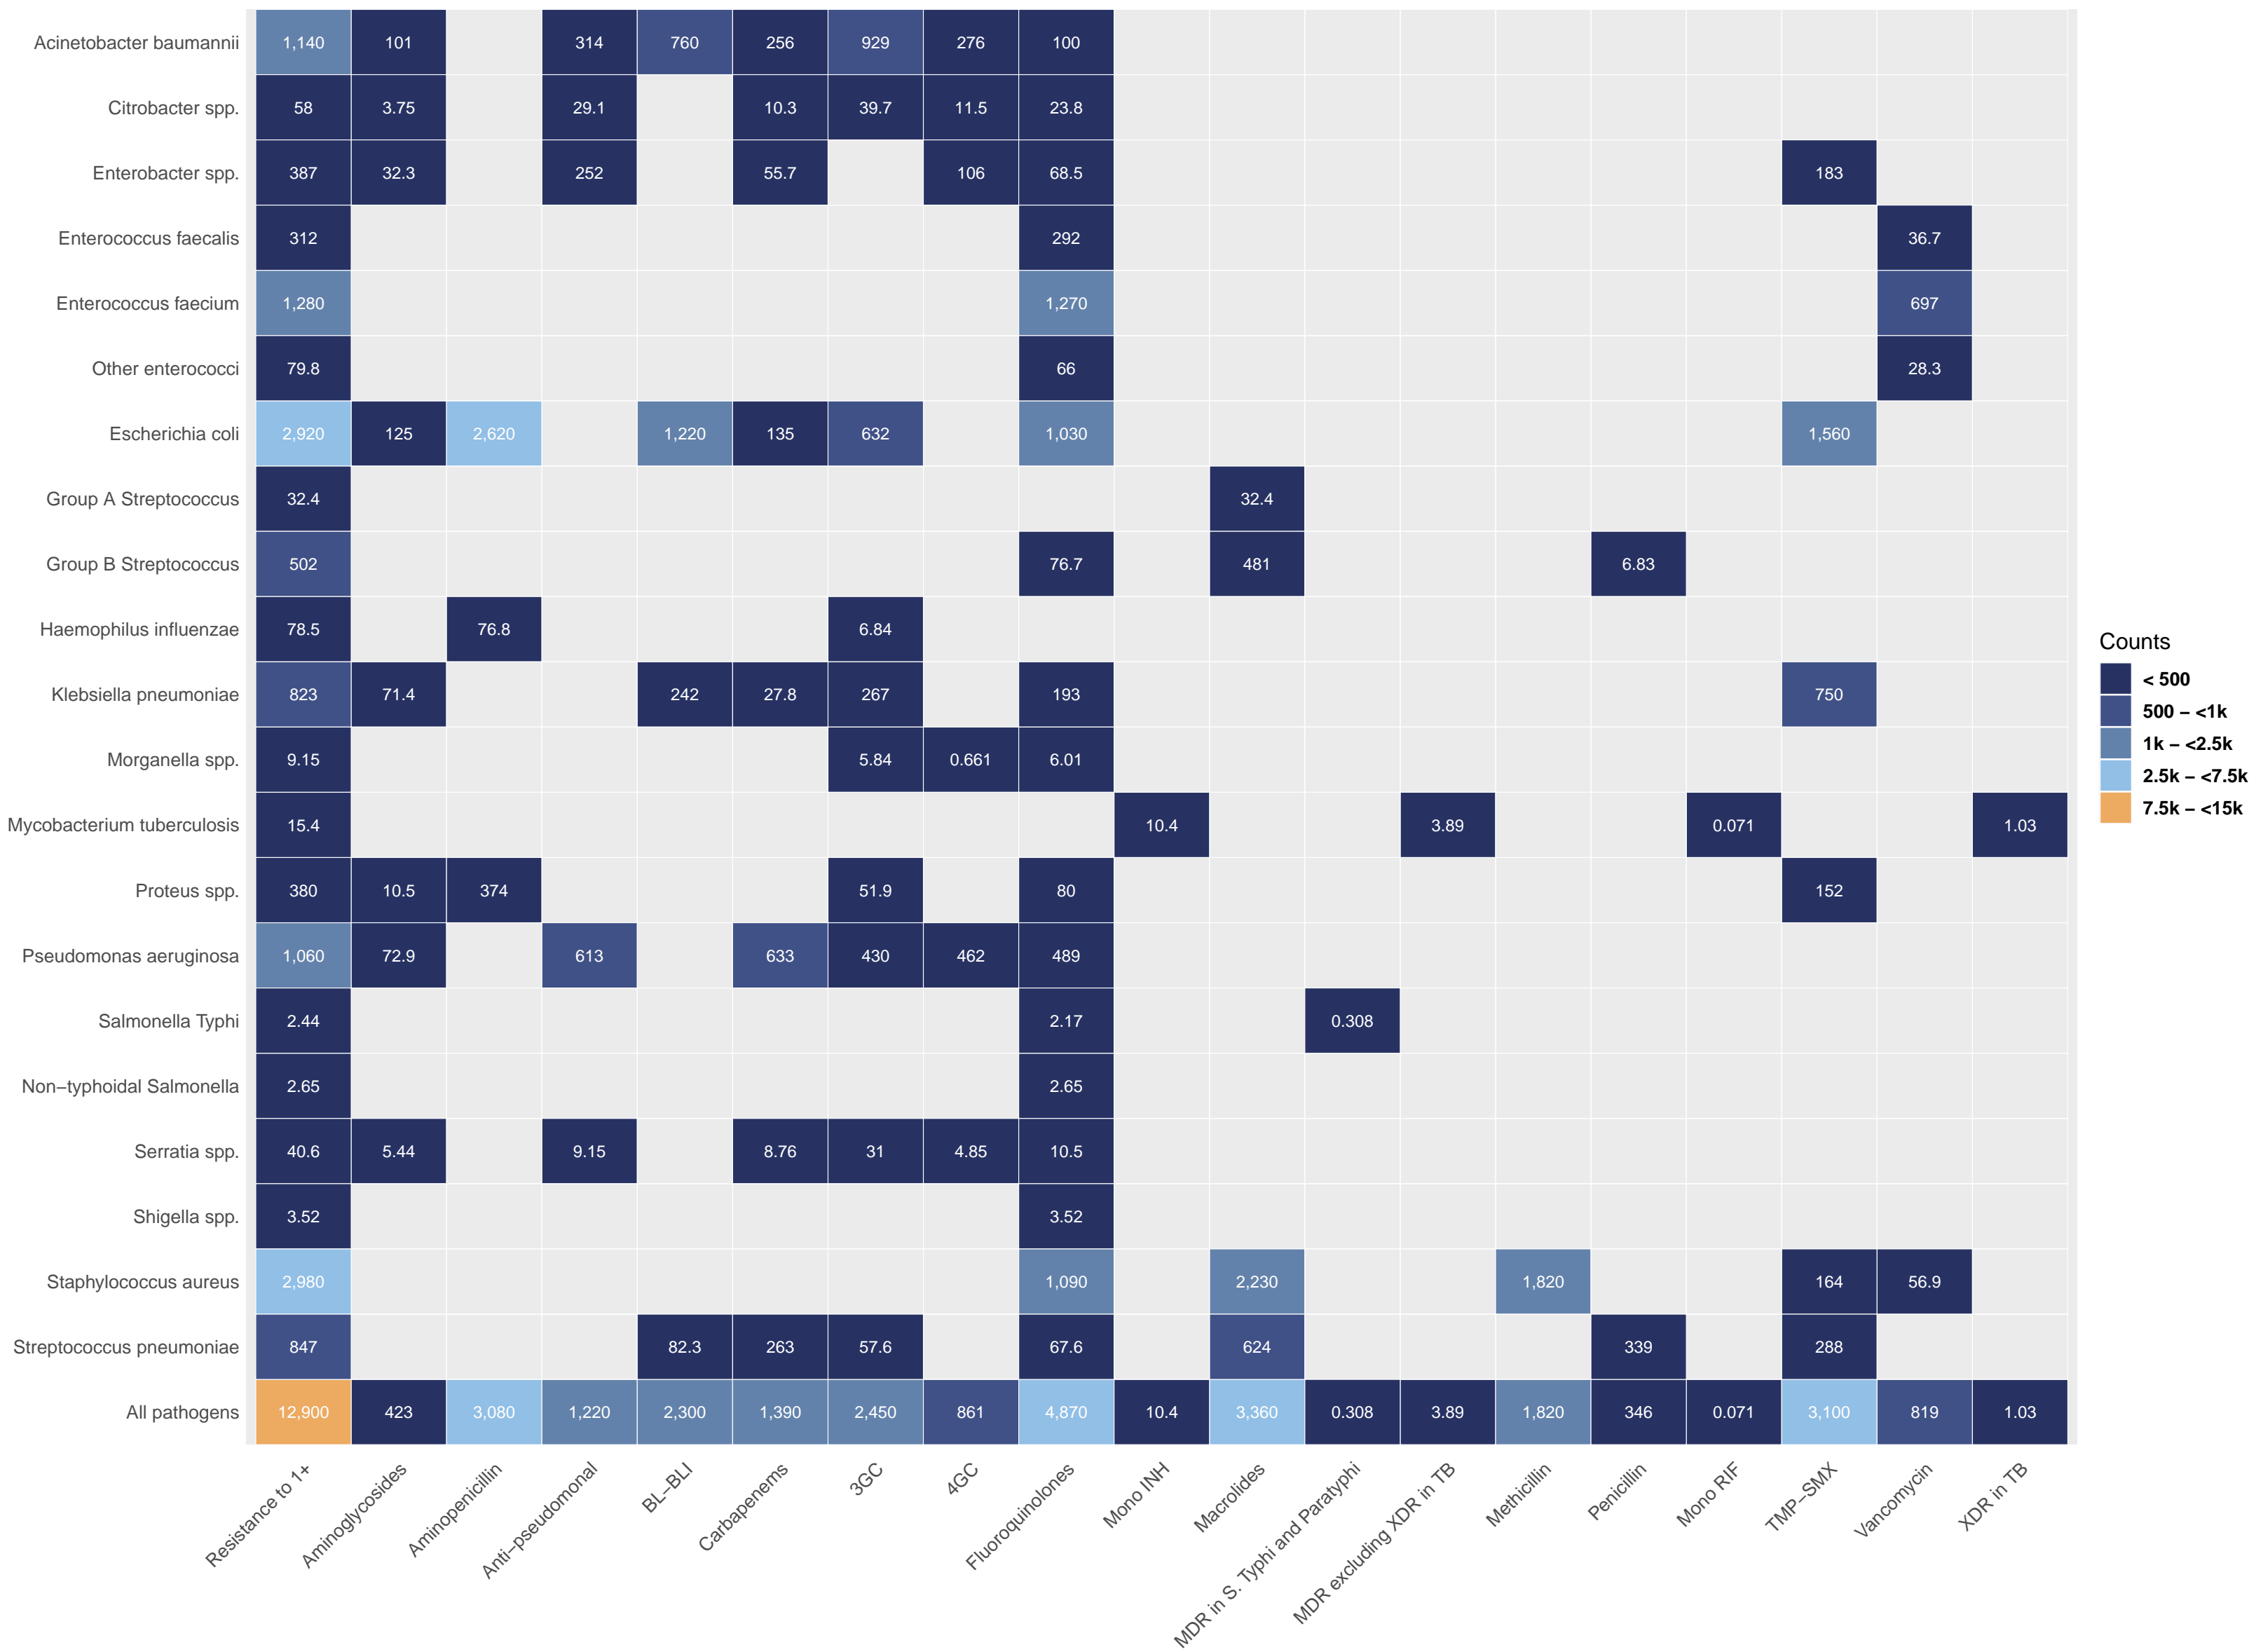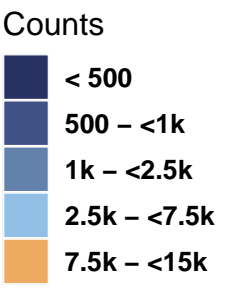

# Canada

Deaths (count) *attributable to* bacterial antimicrobial resistance by pathogen–drug combinations, 2019

|                            |                  |                 |                 |                  |        |             |      |       |                  |          |            |                               |                         |             |            |          |         |            |           |
|----------------------------|------------------|-----------------|-----------------|------------------|--------|-------------|------|-------|------------------|----------|------------|-------------------------------|-------------------------|-------------|------------|----------|---------|------------|-----------|
| Acinetobacter baumannii    | 310              | 7.09            |                 | 28.8             | 34.5   | 60.2        | 155  | 8.15  | 16.9             |          |            |                               |                         |             |            |          |         |            |           |
| Citrobacter spp.           | 16.8             | 0.24            |                 | 6.27             |        | 2.69        | 2.87 | 0.654 | 4.09             |          |            |                               |                         |             |            |          |         |            |           |
| Enterobacter spp.          | 79.3             | 2.54            |                 | 37.7             |        | 15.3        |      | 3.21  | 7.68             |          |            |                               |                         |             |            | 12.9     |         |            |           |
| Enterococcus faecalis      | 85.4             |                 |                 |                  |        |             |      |       | 73               |          |            |                               |                         |             |            |          |         | 12.4       |           |
| Enterococcus faecium       | 372              |                 |                 |                  |        |             |      |       | 212              |          |            |                               |                         |             |            |          |         | 160        |           |
| Other enterococci          | 18.7             |                 |                 |                  |        |             |      |       | 12.3             |          |            |                               |                         |             |            |          |         | 6.46       |           |
| Escherichia coli           | 622              | 10.5            | 145             |                  | 108    | 36.2        | 94.2 |       | 118              |          |            |                               |                         |             |            |          | 110     |            |           |
| Group A Streptococcus      | 3.1              |                 |                 |                  |        |             |      |       |                  |          | 3.1        |                               |                         |             |            |          |         |            |           |
| Group B Streptococcus      | 62.8             |                 |                 |                  |        |             |      |       | 12.1             |          | 48.9       |                               |                         |             | 1.73       |          |         |            |           |
| Haemophilus influenzae     | 15.3             |                 | 13.2            |                  |        |             | 2.07 |       |                  |          |            |                               |                         |             |            |          |         |            |           |
| Klebsiella pneumoniae      | 155              | 8.9             |                 |                  | 7.45   | 12.5        | 45.6 |       | 17.5             |          |            |                               |                         |             |            |          | 63.2    |            |           |
| Morganella spp.            | 2.34             |                 |                 |                  |        |             | 1.19 | 0.151 | 1                |          |            |                               |                         |             |            |          |         |            |           |
| Mycobacterium tuberculosis | 4.6              |                 |                 |                  |        |             |      |       |                  | 1.64     |            |                               | 2.31                    |             |            | 0.02     |         |            | 0.628     |
| Proteus spp.               | 37.2             | 0.755           | 10.4            |                  |        |             | 13.7 |       | 6.15             |          |            |                               |                         |             |            |          | 6.25    |            |           |
| Pseudomonas aeruginosa     | 258              | 2.29            |                 | 63.5             |        | 121         | 7.87 | 8.64  | 54.5             |          |            |                               |                         |             |            |          |         |            |           |
| Salmonella Typhi           | 0.487            |                 |                 |                  |        |             |      |       | 0.448            |          |            | 0.039                         |                         |             |            |          |         |            |           |
| Non-typhoidal Salmonella   | 0.56             |                 |                 |                  |        |             |      |       | 0.56             |          |            |                               |                         |             |            |          |         |            |           |
| Serratia spp.              | 10.9             | 0.329           |                 | 2.11             |        | 2.48        | 4.26 | 0.488 | 1.24             |          |            |                               |                         |             |            |          |         |            |           |
| Shigella spp.              | 0.724            |                 |                 |                  |        |             |      |       | 0.724            |          |            |                               |                         |             |            |          |         |            |           |
| Staphylococcus aureus      | 673              |                 |                 |                  |        |             |      |       | 52               |          | 98.3       |                               | 489                     |             |            |          | 15.5    | 18.2       |           |
| Streptococcus pneumoniae   | 158              |                 |                 |                  | 1.11   | 63.6        | 1.94 |       | 10.3             |          | 30.7       |                               |                         | 25.4        |            |          | 24.6    |            |           |
| All pathogens              | 2,890            | 32.6            | 169             | 138              | 151    | 314         | 328  | 21.3  | 600              | 1.64     | 181        | 0.039                         | 2.31                    | 489         | 27.2       | 0.02     | 232     | 197        | 0.628     |
|                            | Resistance to 1+ | Aminoglycosides | Aminopenicillin | Anti-pseudomonal | BL-BLI | Carbapenems | 3GC  | 4GC   | Fluoroquinolones | Mono INH | Macrolides | MDR in S. Typhi and Paratyphi | MDR excluding XDR in TB | Methicillin | Penicillin | Mono RIF | TMP-SMX | Vancomycin | XDR in TB |

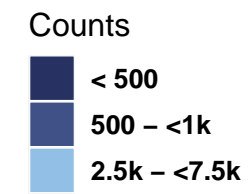

# Chile

Deaths (count) associated with bacterial antimicrobial resistance by pathogen–drug combinations, 2019

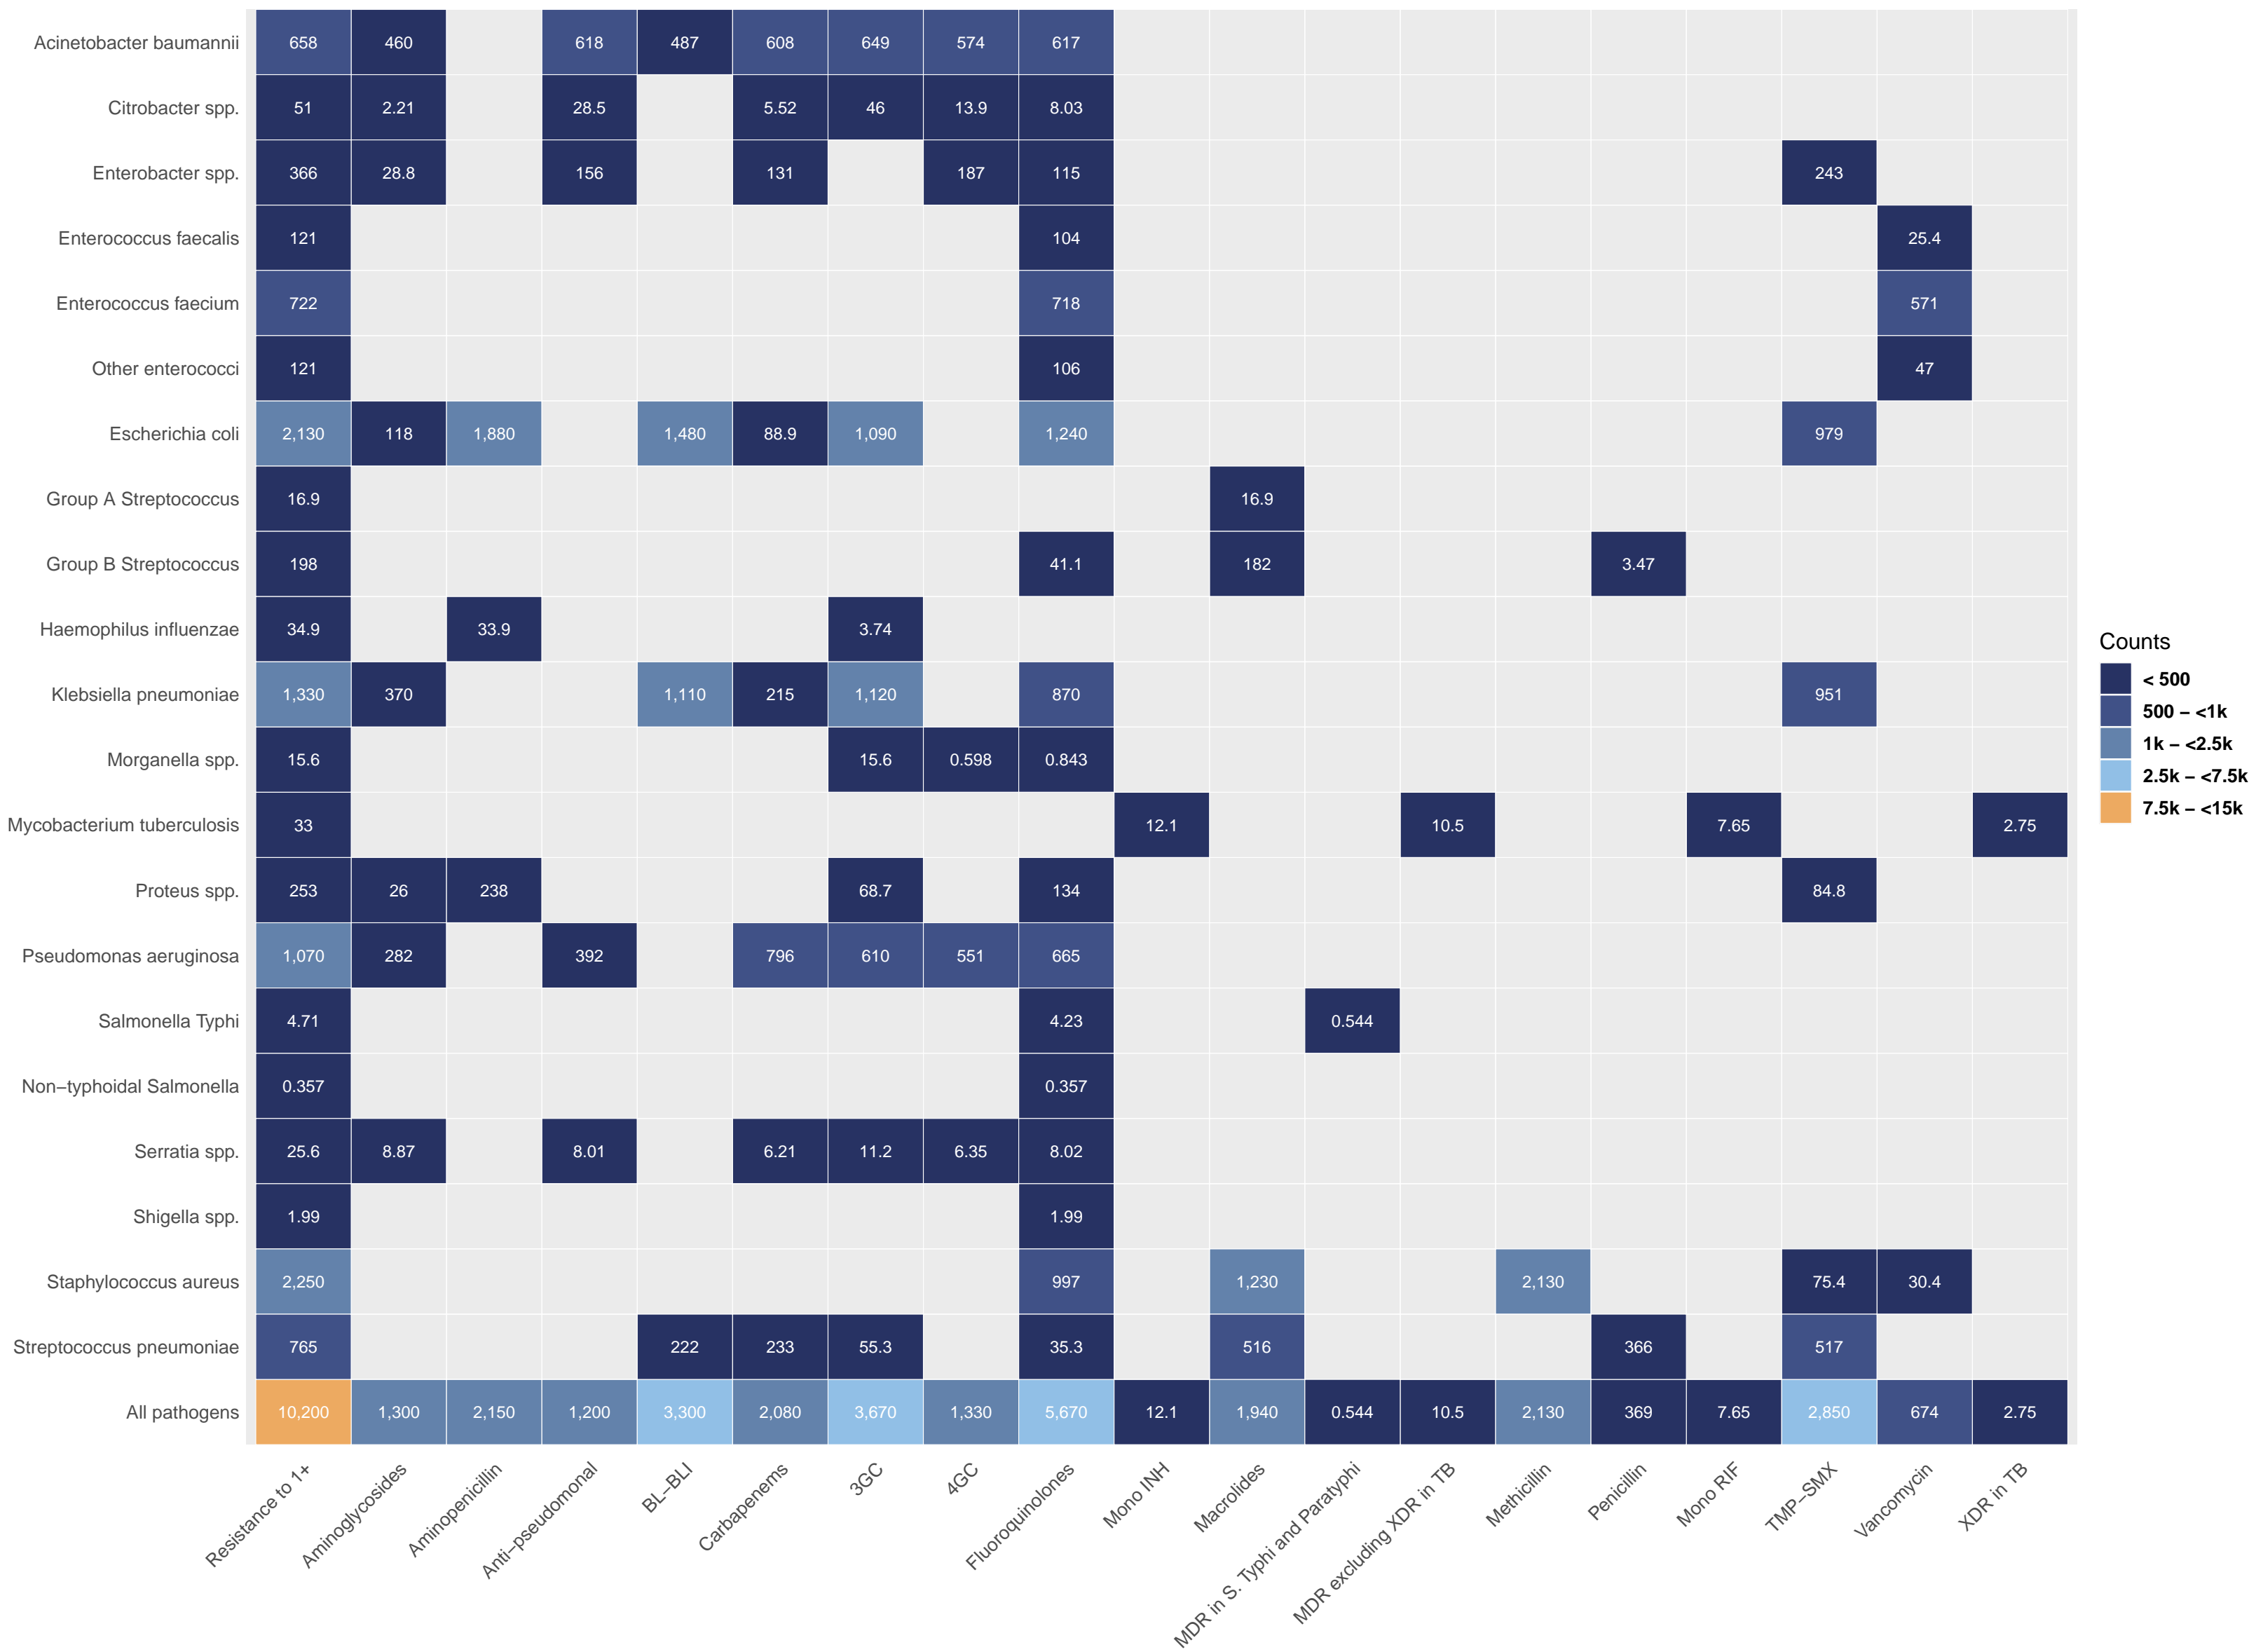

# Chile

Deaths (count) *attributable to* bacterial antimicrobial resistance by pathogen–drug combinations, 2019

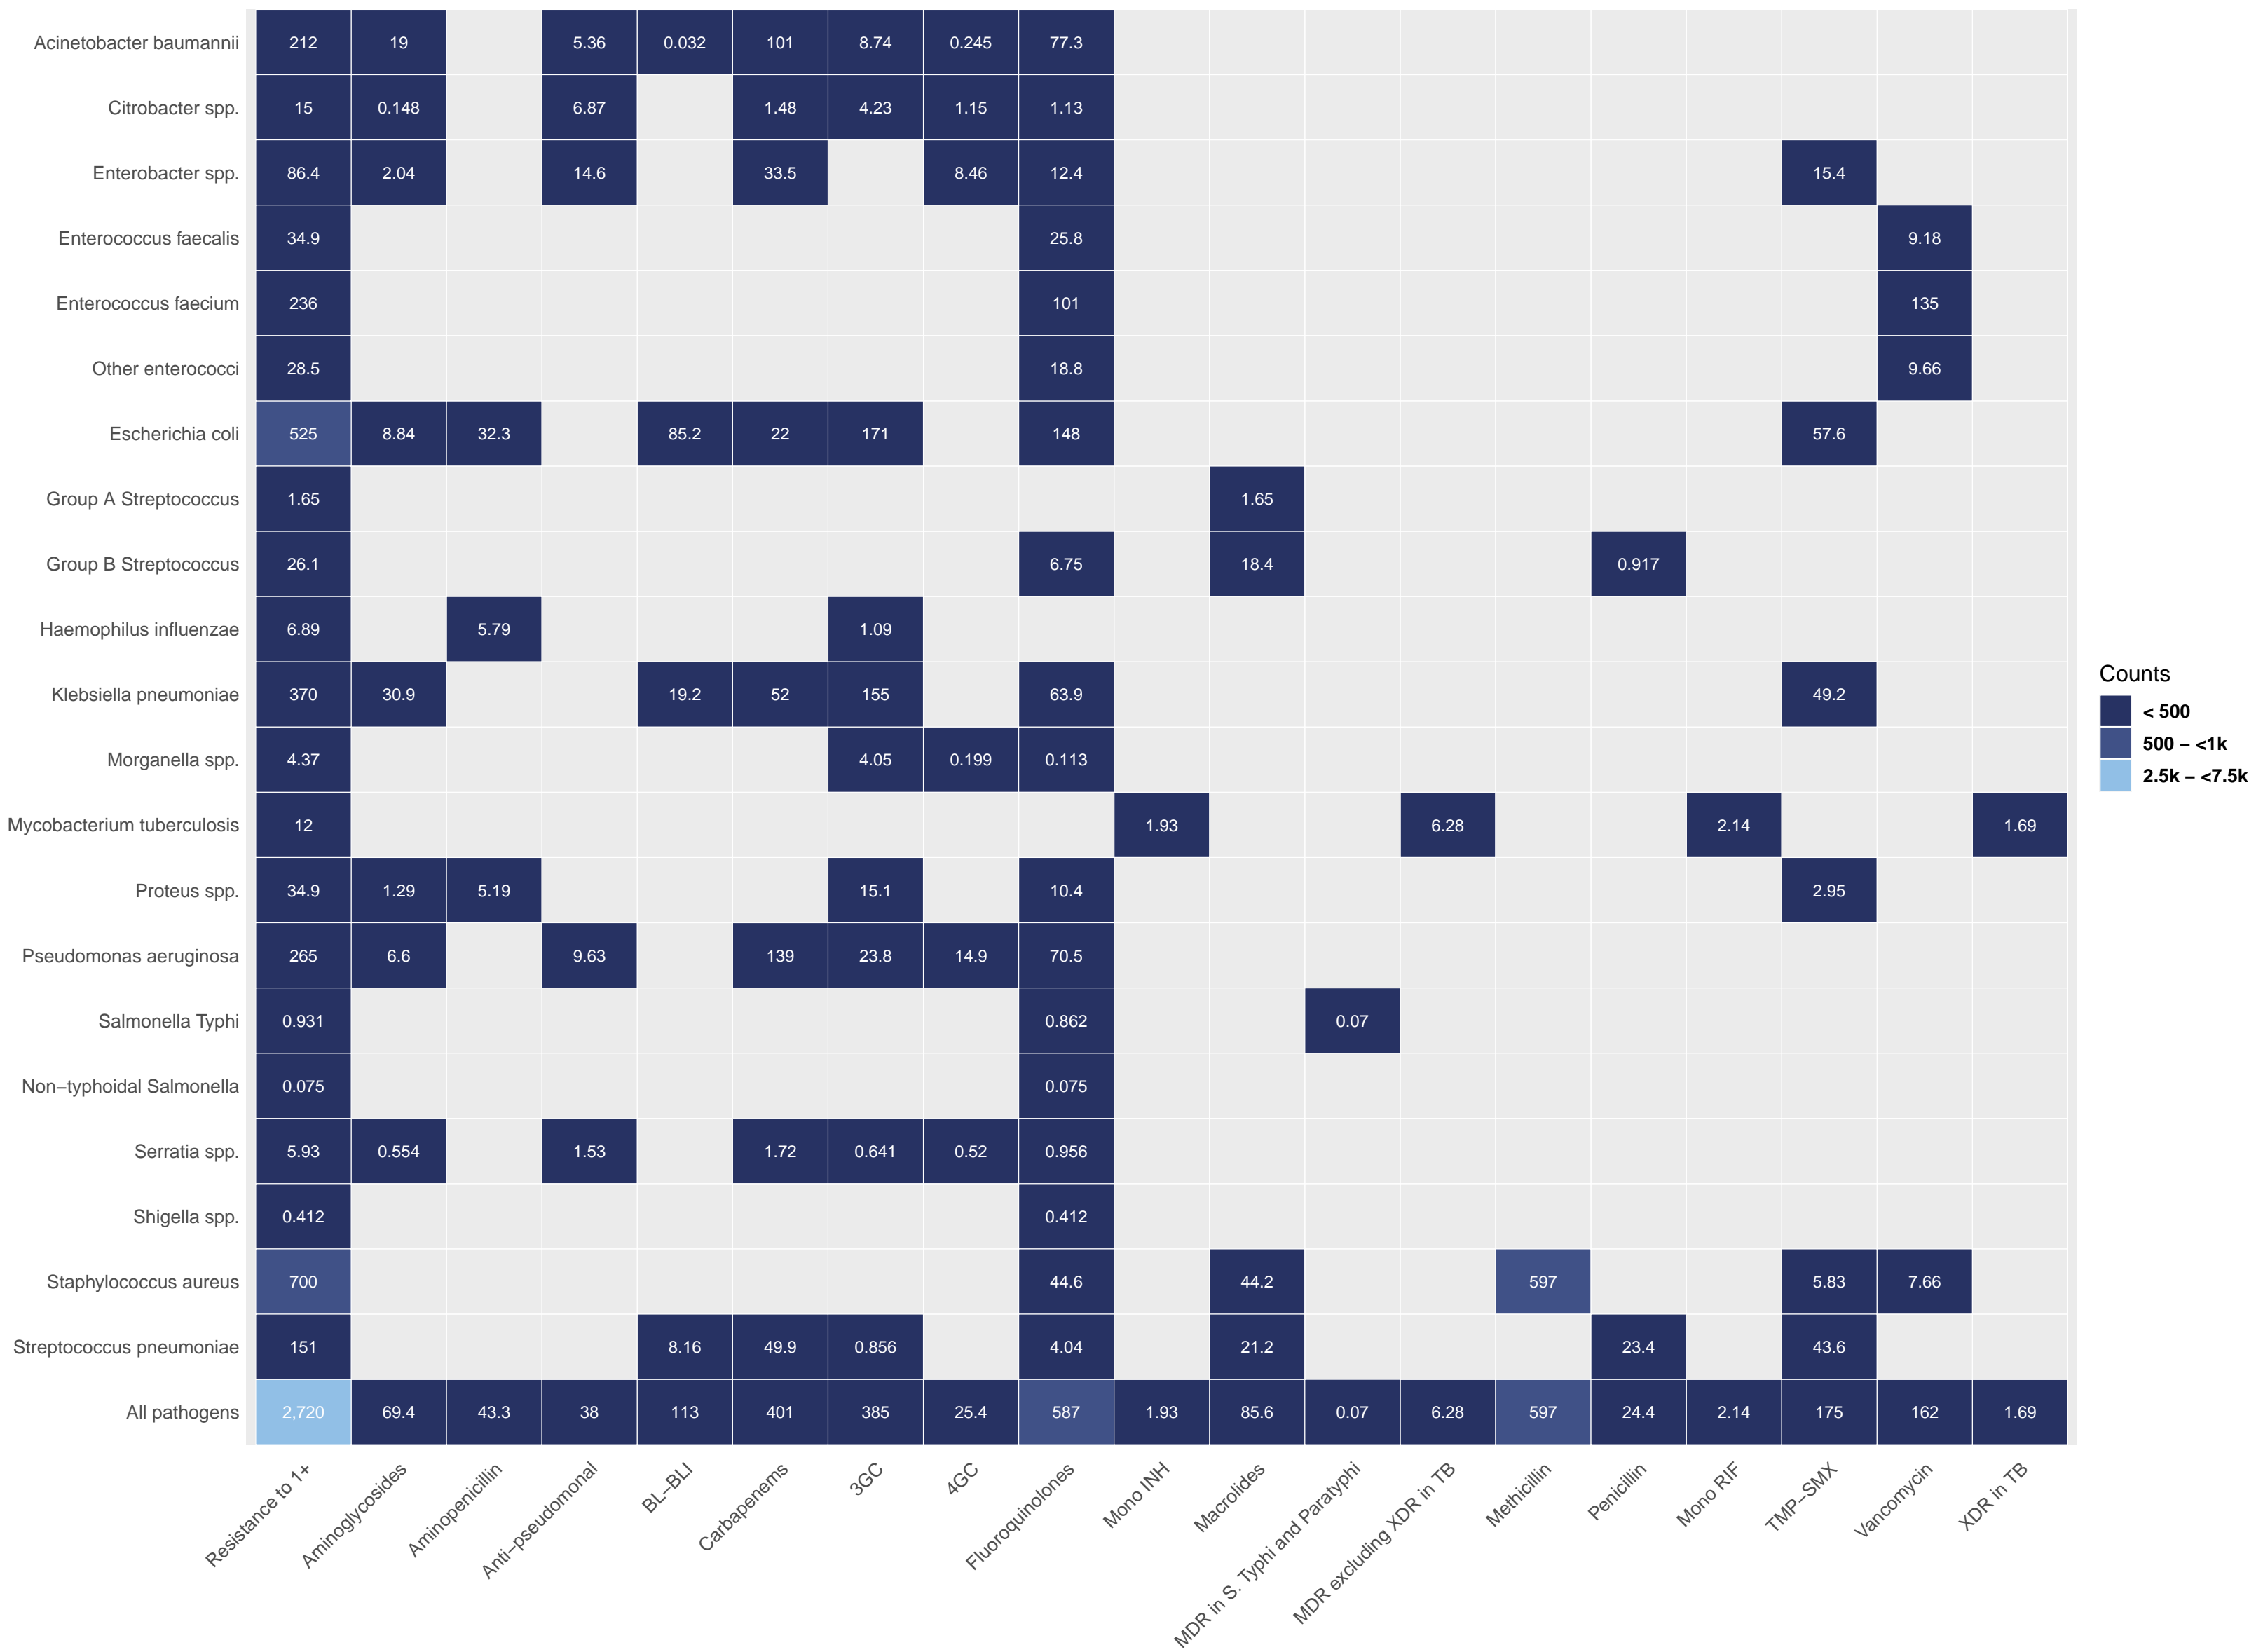

Counts

- < 500
- 500 – <1k
- 2.5k – <7.5k

# Colombia

Deaths (count) associated with bacterial antimicrobial resistance by pathogen–drug combinations, 2019

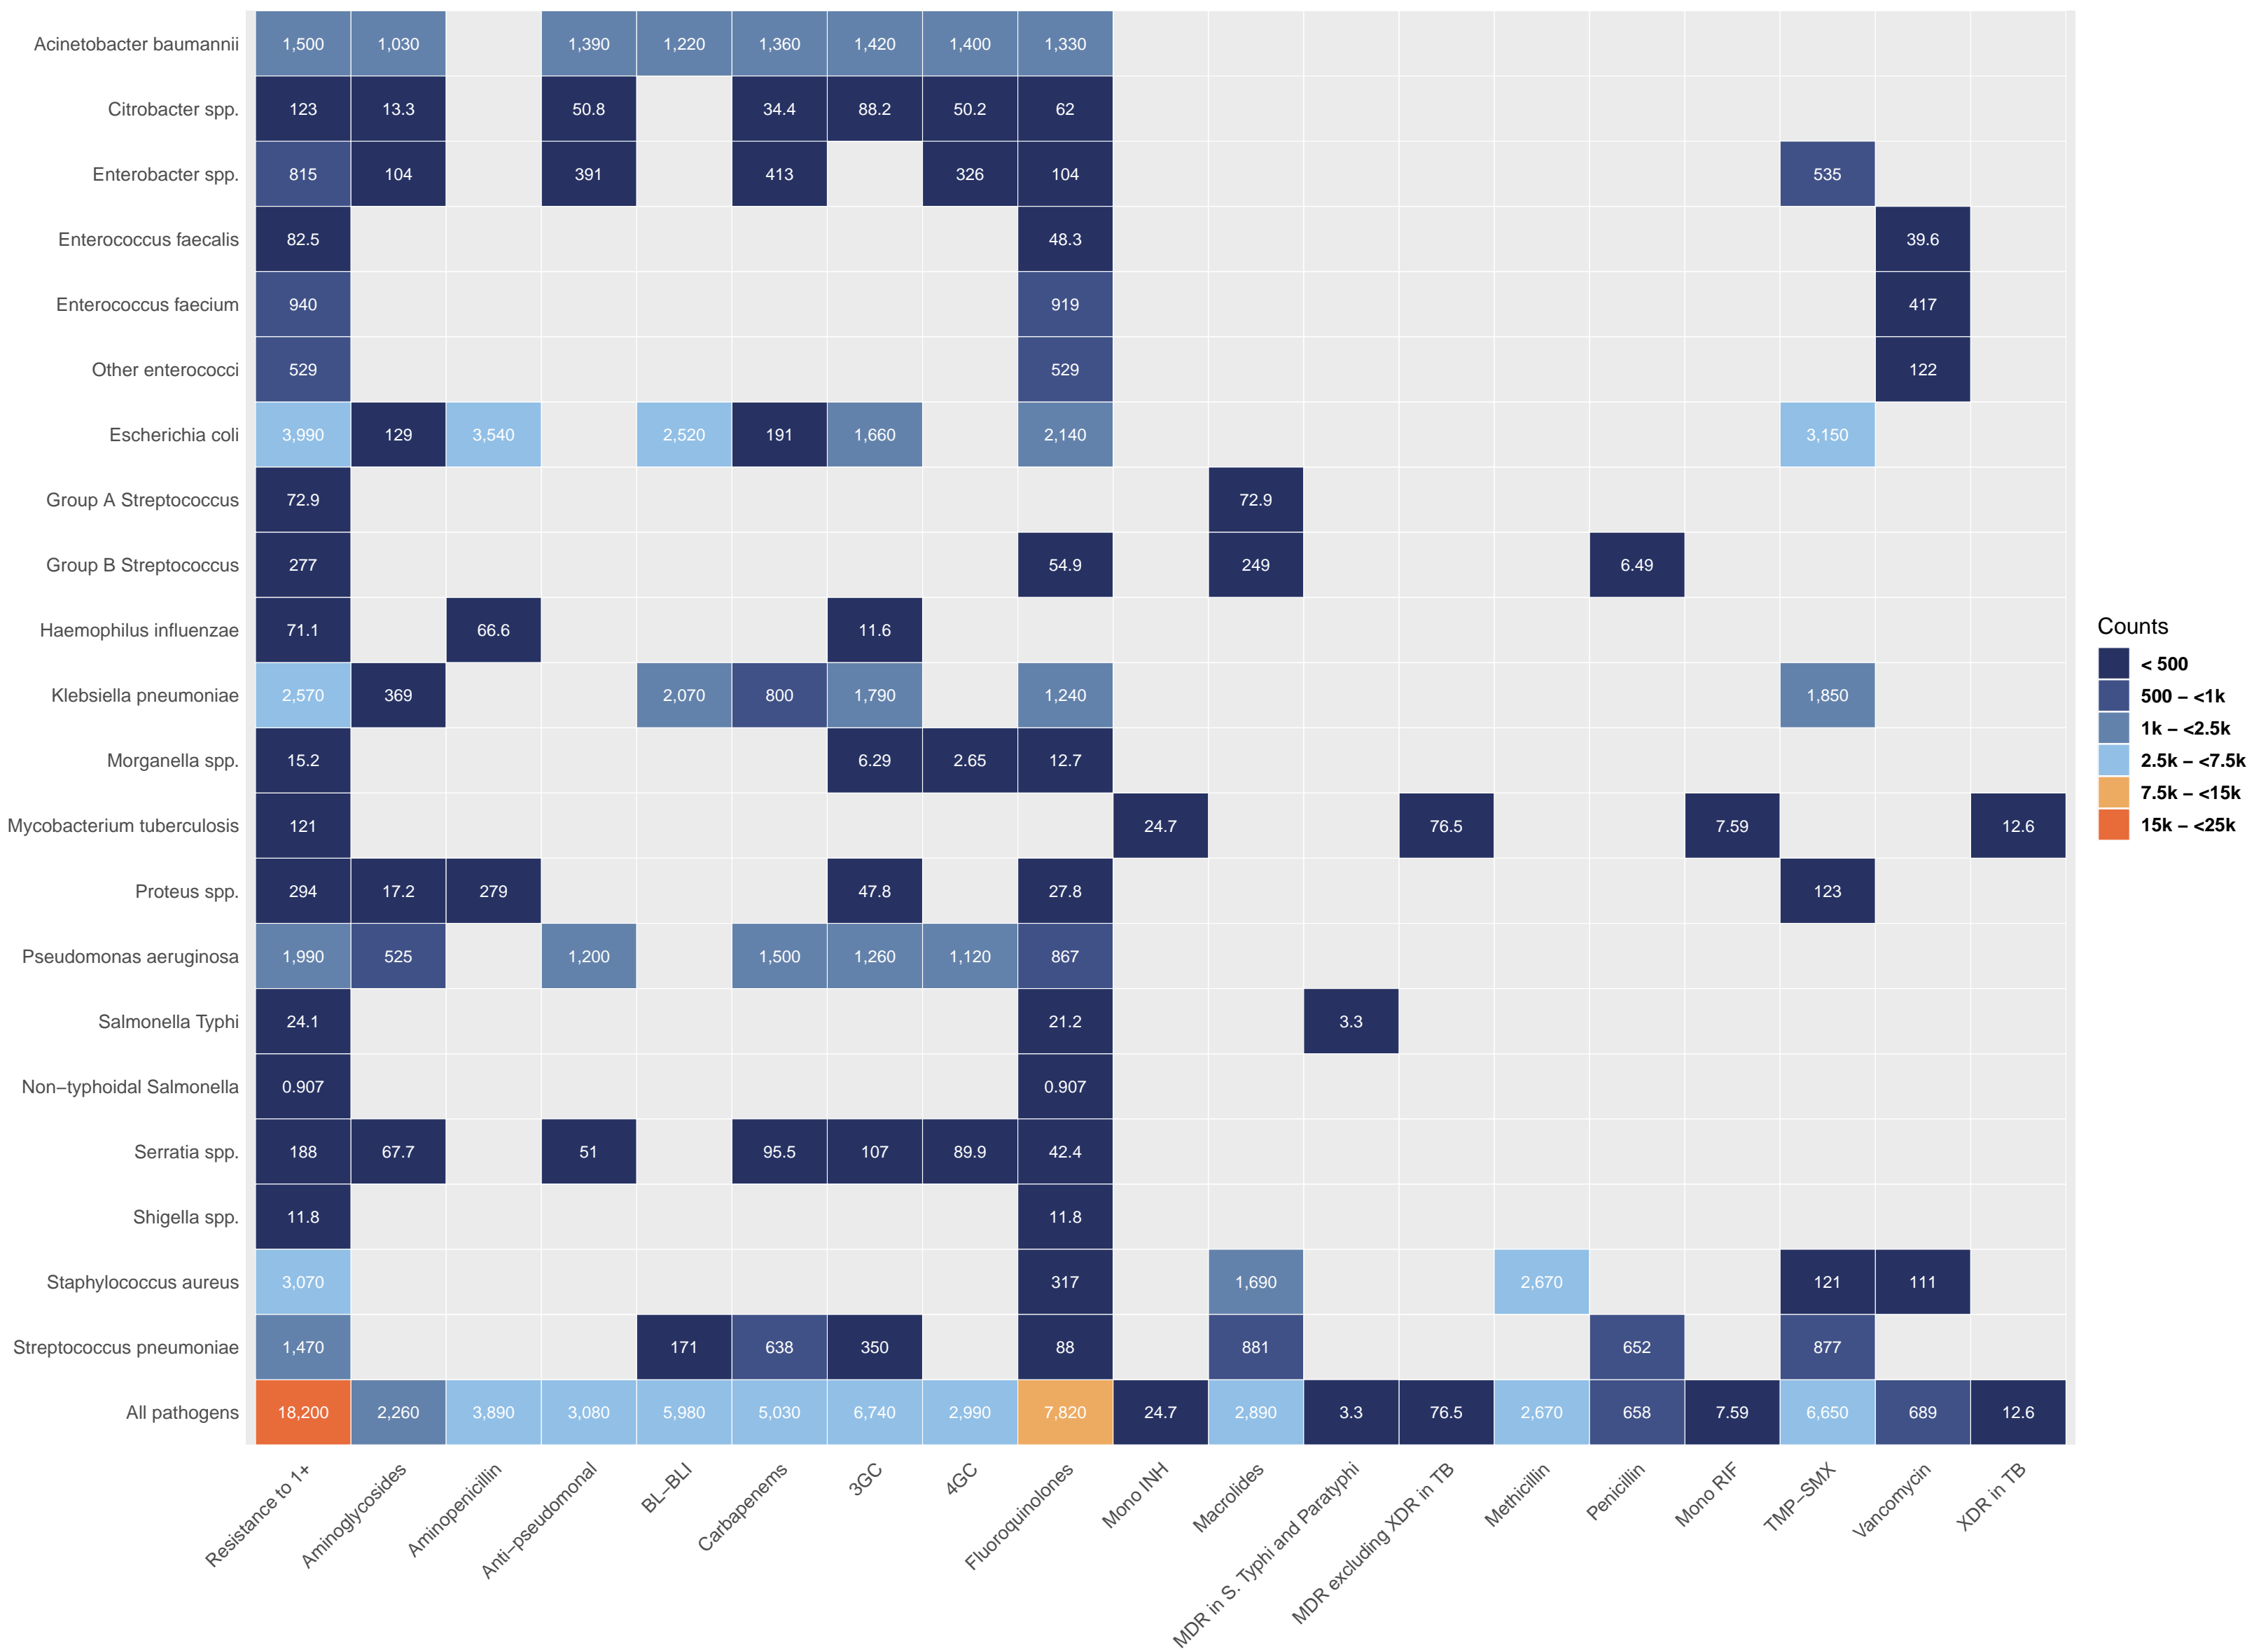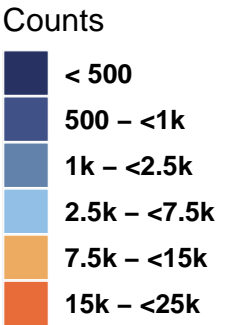

# Colombia

Deaths (count) *attributable to* bacterial antimicrobial resistance by pathogen–drug combinations, 2019

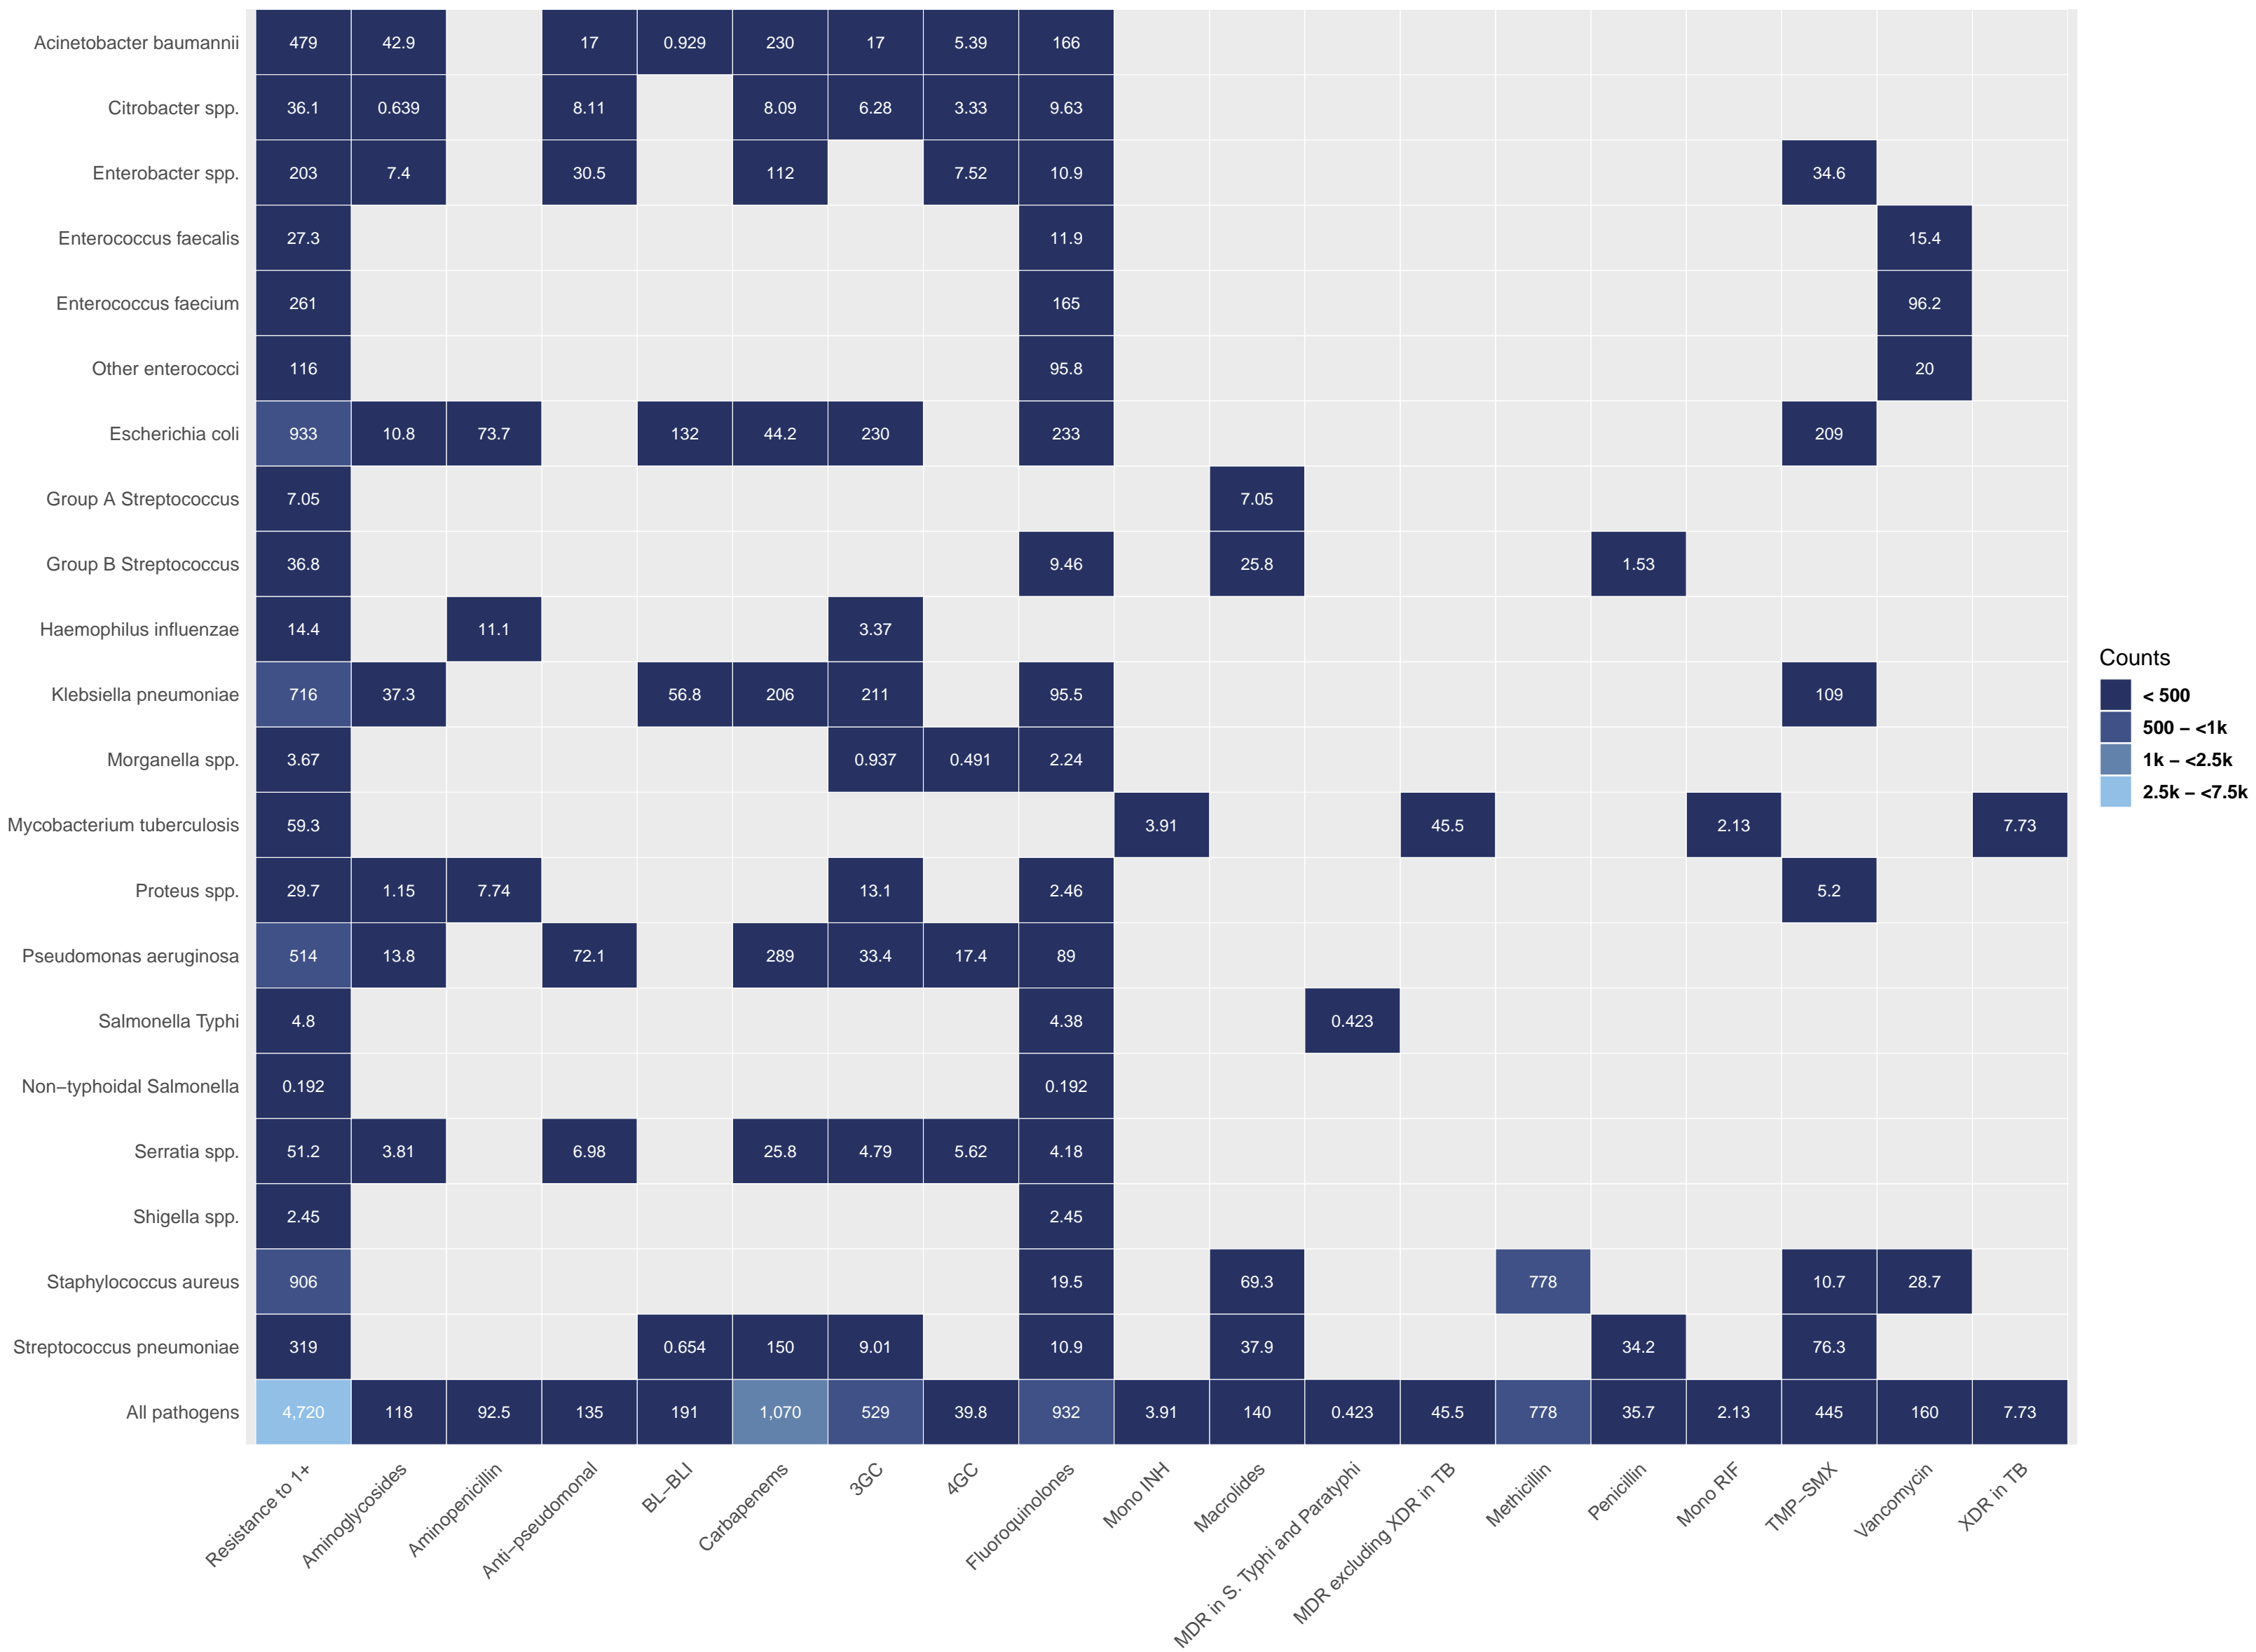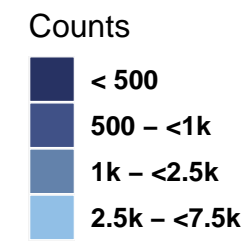

# Costa Rica

Deaths (count) associated with bacterial antimicrobial resistance by pathogen–drug combinations, 2019

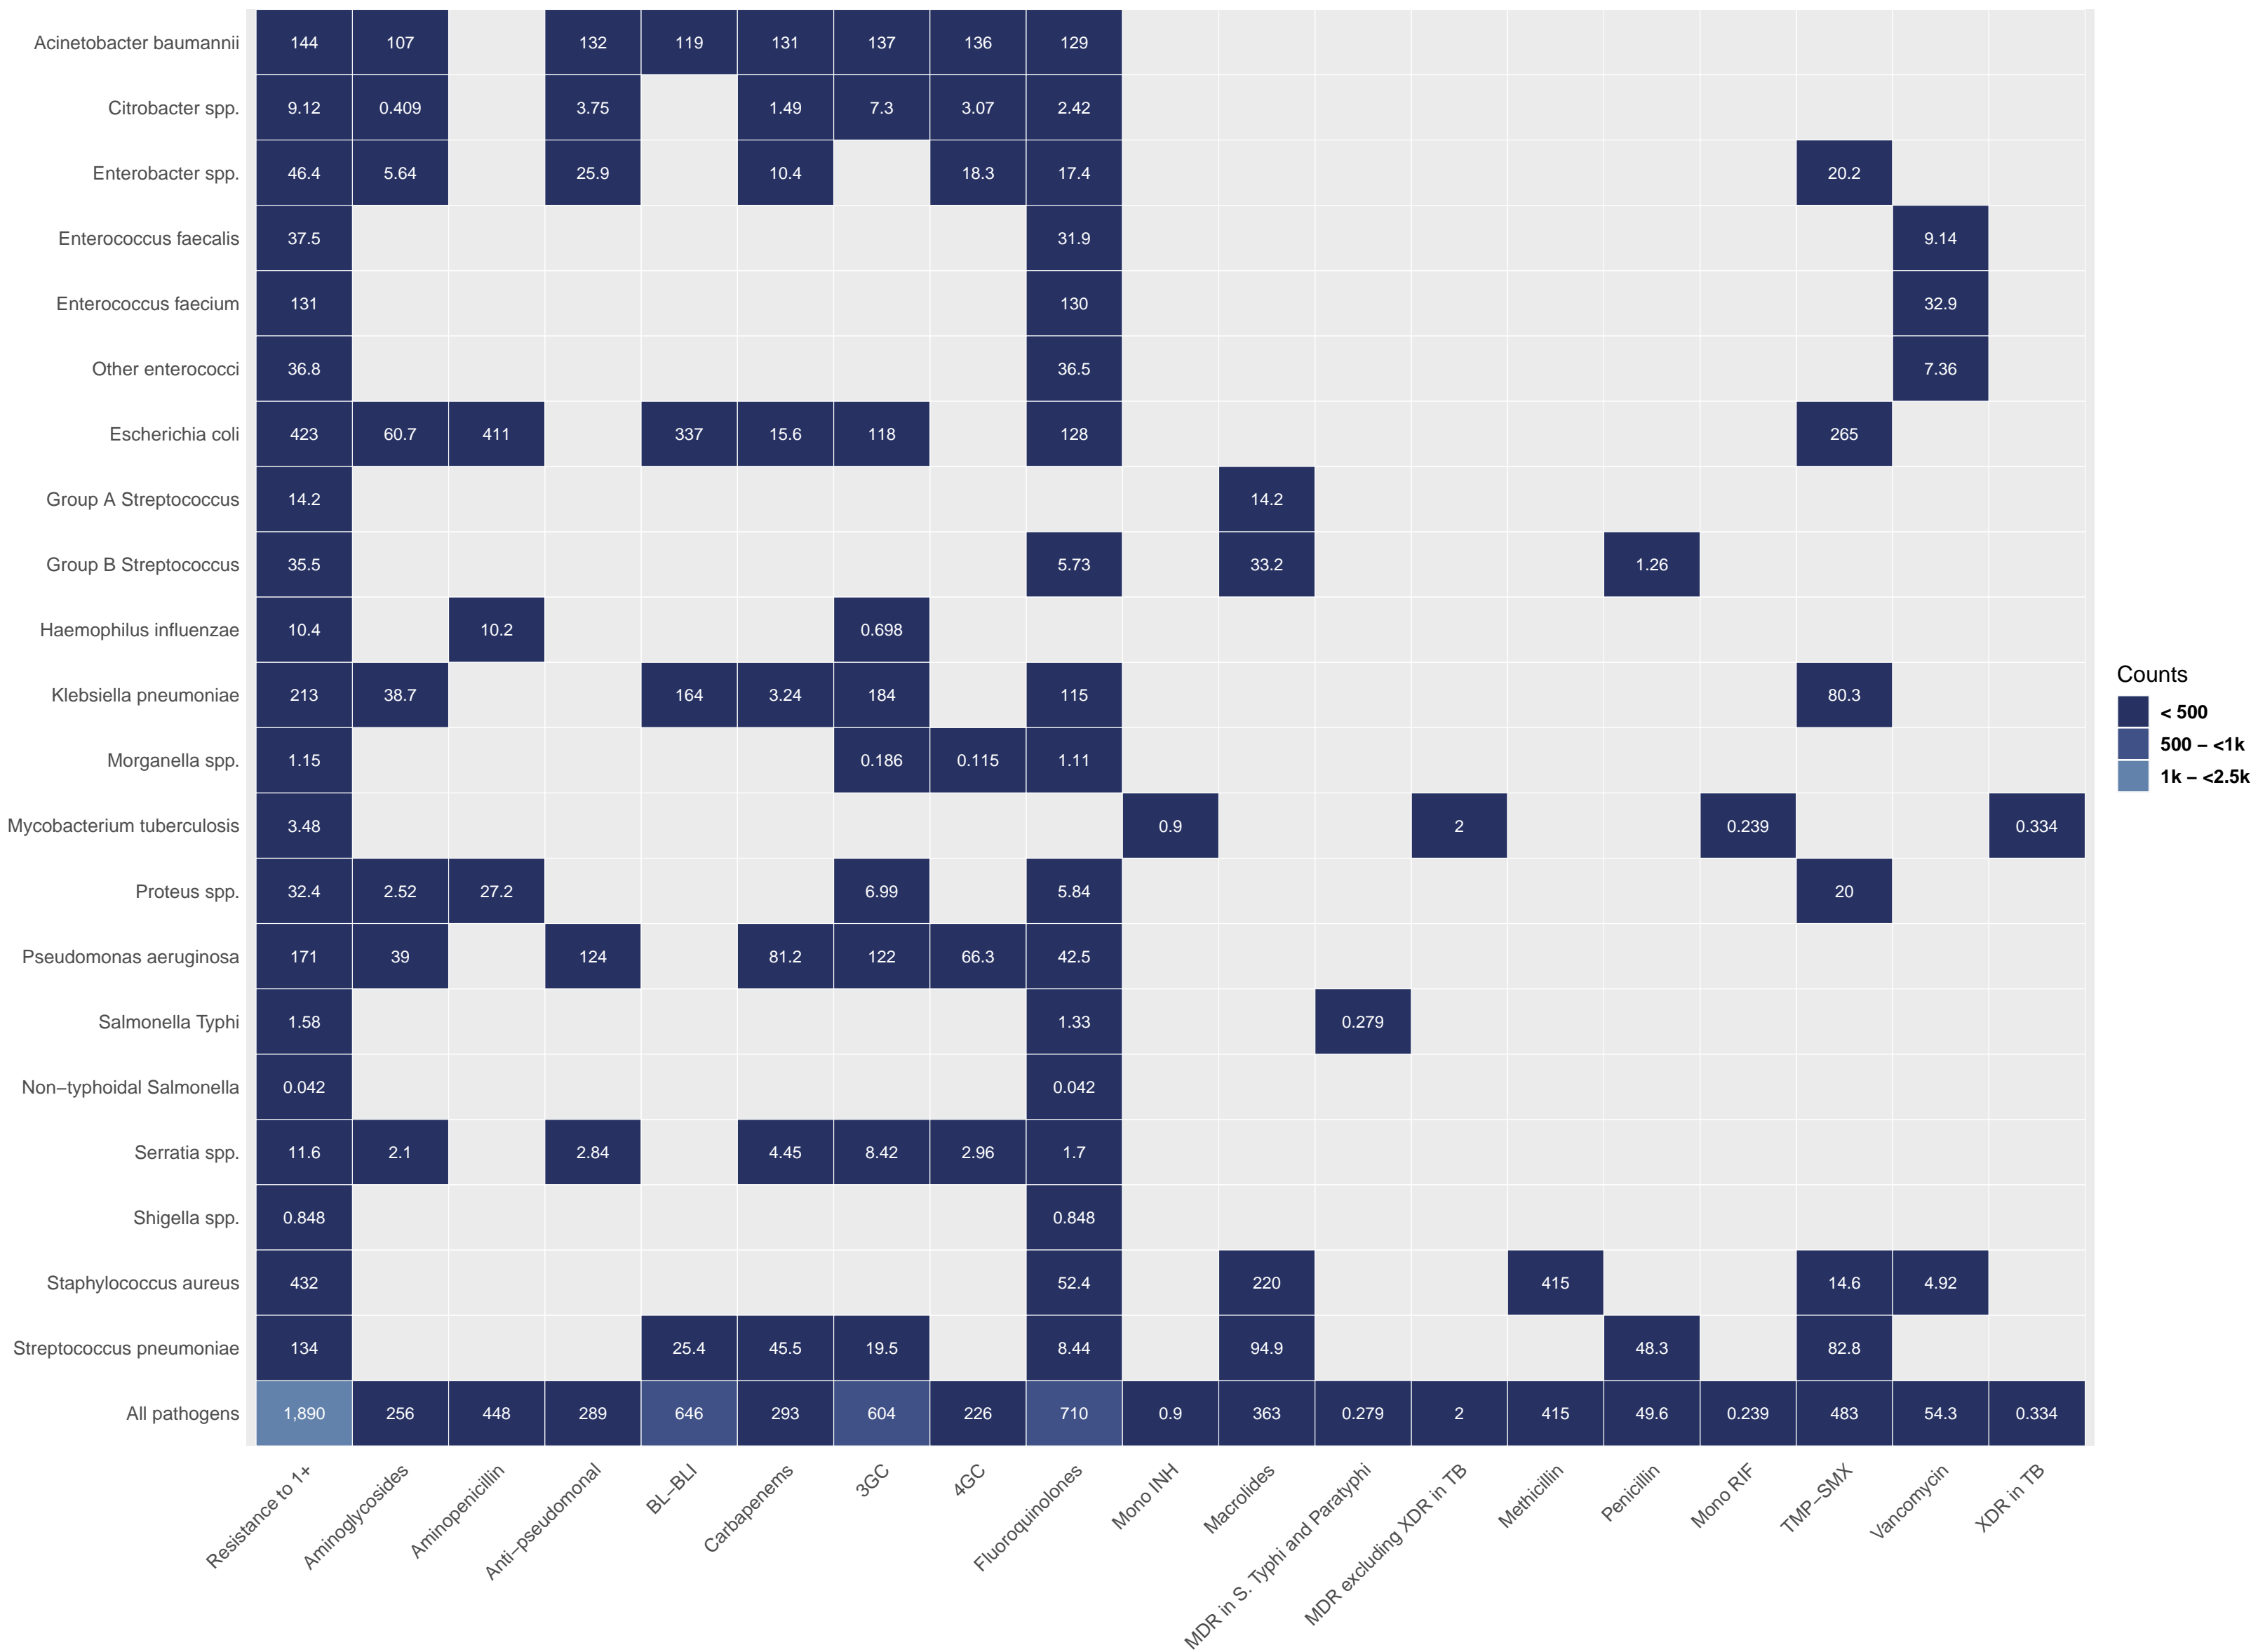

Counts

- < 500
- 500 – <1k
- 1k – <2.5k



# Costa Rica

Deaths (count) *attributable to* bacterial antimicrobial resistance by pathogen–drug combinations, 2019

|                            |                  |                 |                 |                  |        |             |       |       |                  |          |            |                               |                         |             |            |          |         |            |           |
|----------------------------|------------------|-----------------|-----------------|------------------|--------|-------------|-------|-------|------------------|----------|------------|-------------------------------|-------------------------|-------------|------------|----------|---------|------------|-----------|
| Acinetobacter baumannii    | 46.2             | 4.46            |                 | 1.44             | 0.096  | 22          | 1.58  | 0.704 | 15.9             |          |            |                               |                         |             |            |          |         |            |           |
| Citrobacter spp.           | 2.66             | 0.026           |                 | 0.829            |        | 0.392       | 0.749 | 0.287 | 0.379            |          |            |                               |                         |             |            |          |         |            |           |
| Enterobacter spp.          | 10.6             | 0.364           |                 | 3.31             |        | 2.69        |       | 0.804 | 2.17             |          |            |                               |                         |             |            |          | 1.27    |            |           |
| Enterococcus faecalis      | 11               |                 |                 |                  |        |             |       |       | 7.81             |          |            |                               |                         |             |            |          |         | 3.16       |           |
| Enterococcus faecium       | 33               |                 |                 |                  |        |             |       |       | 25.2             |          |            |                               |                         |             |            |          |         | 7.81       |           |
| Other enterococci          | 8.01             |                 |                 |                  |        |             |       |       | 6.75             |          |            |                               |                         |             |            |          |         | 1.26       |           |
| Escherichia coli           | 91.4             | 4.12            | 8.32            |                  | 26.6   | 3.92        | 17.5  |       | 13.4             |          |            |                               |                         |             |            |          | 17.6    |            |           |
| Group A Streptococcus      | 1.36             |                 |                 |                  |        |             |       |       |                  |          | 1.36       |                               |                         |             |            |          |         |            |           |
| Group B Streptococcus      | 4.6              |                 |                 |                  |        |             |       |       | 0.944            |          | 3.41       |                               |                         | 0.249       |            |          |         |            |           |
| Haemophilus influenzae     | 1.99             |                 | 1.77            |                  |        |             | 0.214 |       |                  |          |            |                               |                         |             |            |          |         |            |           |
| Klebsiella pneumoniae      | 56.9             | 3.69            |                 |                  | 3.93   | 1.7         | 34.2  |       | 9.3              |          |            |                               |                         |             |            |          | 4.12    |            |           |
| Morganella spp.            | 0.254            |                 |                 |                  |        |             | 0.023 | 0.018 | 0.213            |          |            |                               |                         |             |            |          |         |            |           |
| Mycobacterium tuberculosis | 1.62             |                 |                 |                  |        |             |       |       |                  | 0.144    |            |                               | 1.2                     |             |            | 0.067    |         |            | 0.205     |
| Proteus spp.               | 3.81             | 0.153           | 0.638           |                  |        |             | 1.68  |       | 0.454            |          |            |                               |                         |             |            |          | 0.887   |            |           |
| Pseudomonas aeruginosa     | 45.3             | 1.14            |                 | 16.5             |        | 16.5        | 6.31  | 0.371 | 4.52             |          |            |                               |                         |             |            |          |         |            |           |
| Salmonella Typhi           | 0.306            |                 |                 |                  |        |             |       |       | 0.27             |          |            | 0.035                         |                         |             |            |          |         |            |           |
| Non-typhoidal Salmonella   | 0.009            |                 |                 |                  |        |             |       |       | 0.009            |          |            |                               |                         |             |            |          |         |            |           |
| Serratia spp.              | 3.23             | 0.124           |                 | 0.558            |        | 1.26        | 0.894 | 0.21  | 0.181            |          |            |                               |                         |             |            |          |         |            |           |
| Shigella spp.              | 0.175            |                 |                 |                  |        |             |       |       | 0.175            |          |            |                               |                         |             |            |          |         |            |           |
| Staphylococcus aureus      | 136              |                 |                 |                  |        |             |       |       | 2.97             |          | 8.24       |                               | 122                     |             |            |          | 1.17    | 1.31       |           |
| Streptococcus pneumoniae   | 26               |                 |                 |                  | 0.5    | 10.2        | 0.366 |       | 1.05             |          | 4.19       |                               |                         | 2.55        |            |          | 7.21    |            |           |
| All pathogens              | 484              | 14.1            | 10.7            | 22.6             | 31.1   | 58.6        | 63.5  | 2.4   | 91.6             | 0.144    | 17.2       | 0.035                         | 1.2                     | 122         | 2.8        | 0.067    | 32.3    | 13.5       | 0.205     |
|                            | Resistance to 1+ | Aminoglycosides | Aminopenicillin | Anti-pseudomonal | BL-BLI | Carbapenems | 3GC   | 4GC   | Fluoroquinolones | Mono INH | Macrolides | MDR in S. Typhi and Paratyphi | MDR excluding XDR in TB | Methicillin | Penicillin | Mono RIF | TMP-SMX | Vancomycin | XDR in TB |

Counts  
 < 500

# Cuba

Deaths (count) associated with bacterial antimicrobial resistance by pathogen–drug combinations, 2019

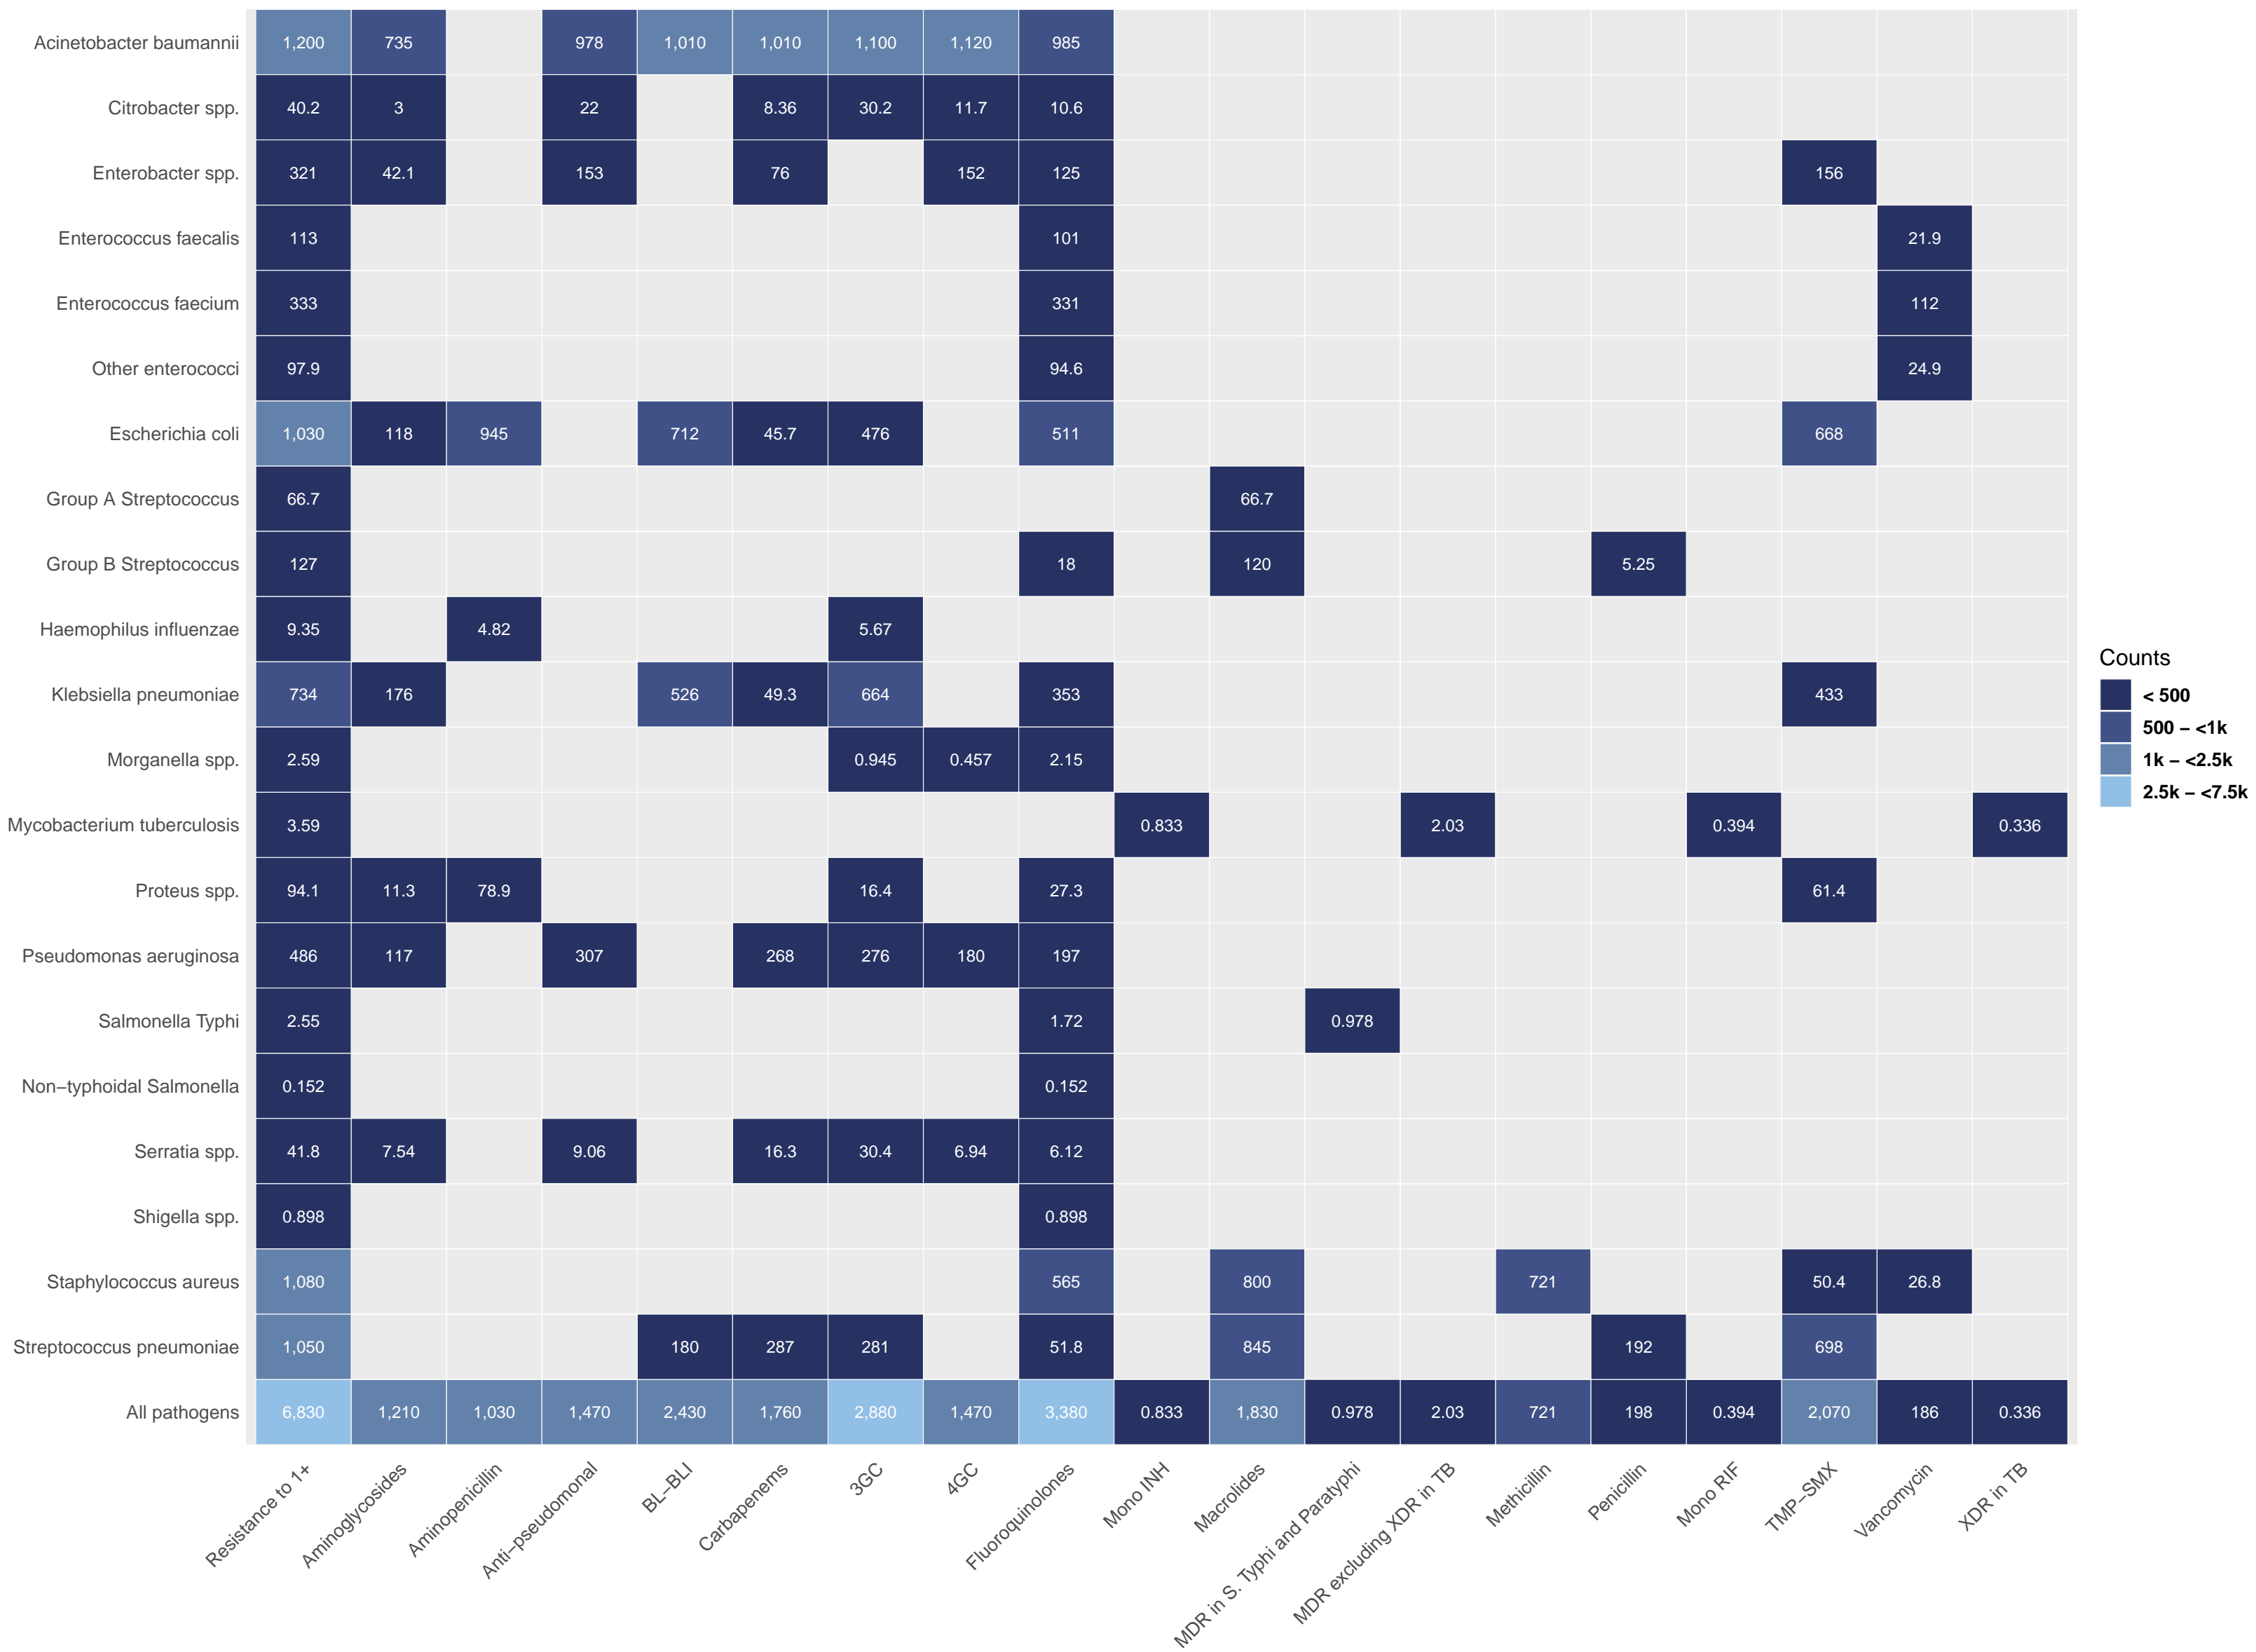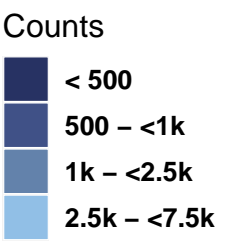

# Cuba

Deaths (count) *attributable to* bacterial antimicrobial resistance by pathogen–drug combinations, 2019

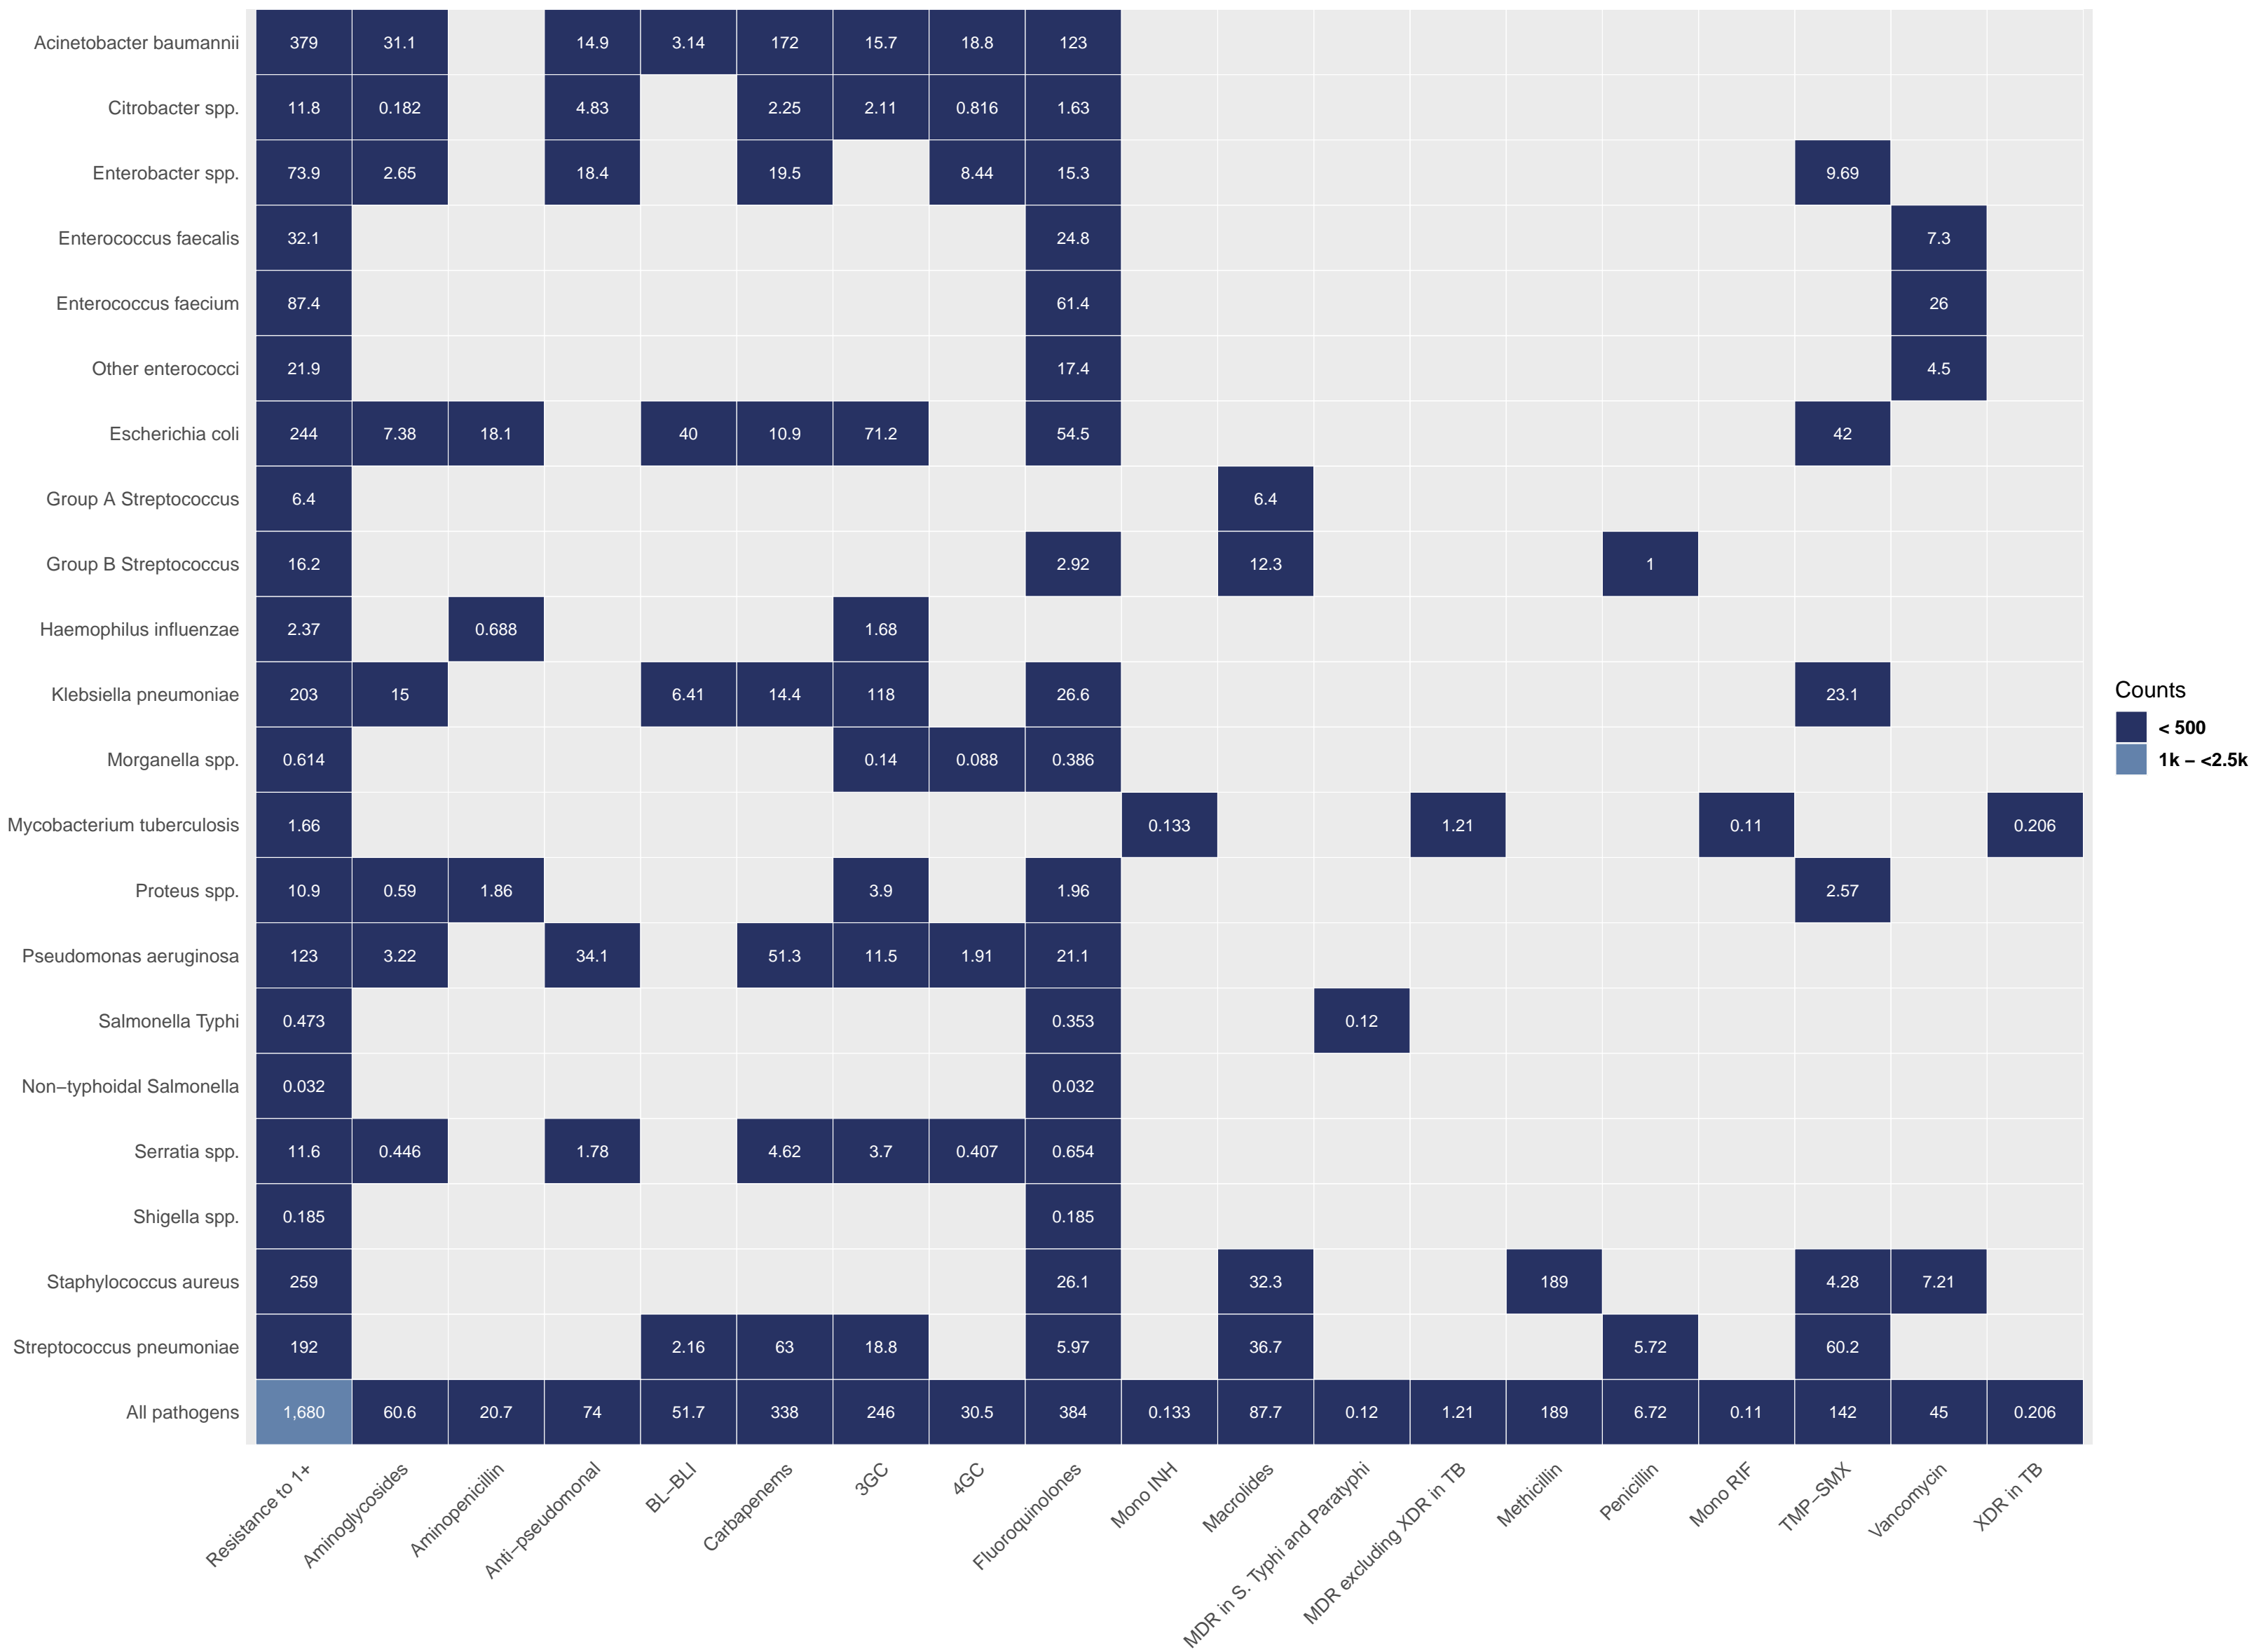

Counts  
 < 500  
 1k – <2.5k

# Dominica

Deaths (count) associated with bacterial antimicrobial resistance by pathogen–drug combinations, 2019

|                            |                  |                 |                 |                  |        |             |       |       |                  |          |            |                               |                         |             |            |          |         |            |           |
|----------------------------|------------------|-----------------|-----------------|------------------|--------|-------------|-------|-------|------------------|----------|------------|-------------------------------|-------------------------|-------------|------------|----------|---------|------------|-----------|
| Acinetobacter baumannii    | 12               | 8.84            |                 | 11.3             | 9.21   | 10.5        | 11.4  | 10.6  | 11.2             |          |            |                               |                         |             |            |          |         |            |           |
| Citrobacter spp.           | 0.408            | 0.048           |                 | 0.105            |        | 0.046       | 0.27  | 0.14  | 0.182            |          |            |                               |                         |             |            |          |         |            |           |
| Enterobacter spp.          | 3.36             | 0.686           |                 | 1.4              |        | 0.653       |       | 1.78  | 1.39             |          |            |                               |                         |             |            |          | 2.16    |            |           |
| Enterococcus faecalis      | 1.09             |                 |                 |                  |        |             |       |       | 0.992            |          |            |                               |                         |             |            |          |         | 0.209      |           |
| Enterococcus faecium       | 2.26             |                 |                 |                  |        |             |       |       | 2.24             |          |            |                               |                         |             |            |          |         | 0.755      |           |
| Other enterococci          | 1.9              |                 |                 |                  |        |             |       |       | 1.9              |          |            |                               |                         |             |            |          |         | 0.136      |           |
| Escherichia coli           | 8.26             | 1.77            | 7.76            |                  | 6.3    | 0.503       | 4.42  |       | 4.92             |          |            |                               |                         |             |            |          | 5.53    |            |           |
| Group A Streptococcus      | 0.456            |                 |                 |                  |        |             |       |       |                  |          | 0.456      |                               |                         |             |            |          |         |            |           |
| Group B Streptococcus      | 1.02             |                 |                 |                  |        |             |       |       | 0.366            |          | 0.8        |                               |                         | 0.058       |            |          |         |            |           |
| Haemophilus influenzae     | 0.091            |                 | 0.058           |                  |        |             | 0.046 |       |                  |          |            |                               |                         |             |            |          |         |            |           |
| Klebsiella pneumoniae      | 7.82             | 3.27            |                 |                  | 6.92   | 0.687       | 5.52  |       | 4.87             |          |            |                               |                         |             |            |          | 6.43    |            |           |
| Morganella spp.            | 0.044            |                 |                 |                  |        |             | 0.008 | 0.009 | 0.041            |          |            |                               |                         |             |            |          |         |            |           |
| Mycobacterium tuberculosis | 0.058            |                 |                 |                  |        |             |       |       |                  | 0.008    |            |                               | 0.038                   |             |            | 0.005    |         |            | 0.006     |
| Proteus spp.               | 1.33             | 0.101           | 1.28            |                  |        |             | 0.28  |       | 0.527            |          |            |                               |                         |             |            |          | 0.695   |            |           |
| Pseudomonas aeruginosa     | 5.26             | 1.92            |                 | 2.58             |        | 3.84        | 2.93  | 2.05  | 2.75             |          |            |                               |                         |             |            |          |         |            |           |
| Salmonella Typhi           | 0.111            |                 |                 |                  |        |             |       |       | 0.091            |          |            | 0.023                         |                         |             |            |          |         |            |           |
| Non-typhoidal Salmonella   | 0.014            |                 |                 |                  |        |             |       |       | 0.014            |          |            |                               |                         |             |            |          |         |            |           |
| Serratia spp.              | 0.686            | 0.216           |                 | 0.209            |        | 0.155       | 0.477 | 0.287 | 0.169            |          |            |                               |                         |             |            |          |         |            |           |
| Shigella spp.              | 0.002            |                 |                 |                  |        |             |       |       | 0.002            |          |            |                               |                         |             |            |          |         |            |           |
| Staphylococcus aureus      | 8.23             |                 |                 |                  |        |             |       |       | 2.76             |          | 5.66       |                               | 7.13                    |             |            |          | 1.27    | 0.086      |           |
| Streptococcus pneumoniae   | 5.86             |                 |                 |                  | 1.19   | 1.73        | 0.811 |       | 0.397            |          | 3.49       |                               |                         | 1.51        |            |          | 4.69    |            |           |
| All pathogens              | 60.3             | 16.9            | 9.1             | 15.6             | 23.6   | 18.1        | 26.2  | 14.9  | 34.8             | 0.008    | 10.4       | 0.023                         | 0.038                   | 7.13        | 1.57       | 0.005    | 20.8    | 1.19       | 0.006     |
|                            | Resistance to 1+ | Aminoglycosides | Aminopenicillin | Anti-pseudomonal | BL-BLI | Carbapenems | 3GC   | 4GC   | Fluoroquinolones | Mono INH | Macrolides | MDR in S. Typhi and Paratyphi | MDR excluding XDR in TB | Methicillin | Penicillin | Mono RIF | TMP-SMX | Vancomycin | XDR in TB |

Counts  
 < 500

# Dominica

Deaths (count) *attributable to* bacterial antimicrobial resistance by pathogen–drug combinations, 2019

|                            |                  |                 |                 |                  |        |             |        |       |                  |          |            |                               |                         |             |            |          |         |            |           |
|----------------------------|------------------|-----------------|-----------------|------------------|--------|-------------|--------|-------|------------------|----------|------------|-------------------------------|-------------------------|-------------|------------|----------|---------|------------|-----------|
| Acinetobacter baumannii    | 3.84             | 0.367           |                 | 0.194            | 0.004  | 1.71        | 0.163  | 0.014 | 1.4              |          |            |                               |                         |             |            |          |         |            |           |
| Citrobacter spp.           | 0.115            | 0.003           |                 | 0.022            |        | 0.011       | 0.031  | 0.016 | 0.031            |          |            |                               |                         |             |            |          |         |            |           |
| Enterobacter spp.          | 0.745            | 0.041           |                 | 0.154            |        | 0.152       |        | 0.11  | 0.157            |          |            |                               |                         |             |            |          | 0.131   |            |           |
| Enterococcus faecalis      | 0.309            |                 |                 |                  |        |             |        |       | 0.242            |          |            |                               |                         |             |            |          |         | 0.067      |           |
| Enterococcus faecium       | 0.593            |                 |                 |                  |        |             |        |       | 0.418            |          |            |                               |                         |             |            |          |         | 0.175      |           |
| Other enterococci          | 0.393            |                 |                 |                  |        |             |        |       | 0.368            |          |            |                               |                         |             |            |          |         | 0.024      |           |
| Escherichia coli           | 2.06             | 0.104           | 0.101           |                  | 0.291  | 0.11        | 0.614  |       | 0.515            |          |            |                               |                         |             |            |          | 0.321   |            |           |
| Group A Streptococcus      | 0.044            |                 |                 |                  |        |             |        |       |                  |          | 0.044      |                               |                         |             |            |          |         |            |           |
| Group B Streptococcus      | 0.155            |                 |                 |                  |        |             |        |       | 0.065            |          | 0.079      |                               |                         | 0.011       |            |          |         |            |           |
| Haemophilus influenzae     | 0.022            |                 | 0.008           |                  |        |             | 0.014  |       |                  |          |            |                               |                         |             |            |          |         |            |           |
| Klebsiella pneumoniae      | 1.99             | 0.243           |                 |                  | 0.19   | 0.175       | 0.731  |       | 0.324            |          |            |                               |                         |             |            |          | 0.324   |            |           |
| Morganella spp.            | 0.01             |                 |                 |                  |        |             | 0.0009 | 0.001 | 0.008            |          |            |                               |                         |             |            |          |         |            |           |
| Mycobacterium tuberculosis | 0.029            |                 |                 |                  |        |             |        |       |                  | 0.001    |            |                               | 0.023                   |             |            | 0.002    |         |            | 0.004     |
| Proteus spp.               | 0.164            | 0.006           | 0.03            |                  |        |             | 0.065  |       | 0.038            |          |            |                               |                         |             |            |          | 0.026   |            |           |
| Pseudomonas aeruginosa     | 1.31             | 0.05            |                 | 0.129            |        | 0.7         | 0.119  | 0.026 | 0.285            |          |            |                               |                         |             |            |          |         |            |           |
| Salmonella Typhi           | 0.022            |                 |                 |                  |        |             |        |       | 0.019            |          |            | 0.003                         |                         |             |            |          |         |            |           |
| Non-typhoidal Salmonella   | 0.003            |                 |                 |                  |        |             |        |       | 0.003            |          |            |                               |                         |             |            |          |         |            |           |
| Serratia spp.              | 0.177            | 0.013           |                 | 0.042            |        | 0.041       | 0.037  | 0.026 | 0.018            |          |            |                               |                         |             |            |          |         |            |           |
| Shigella spp.              | 0.0004           |                 |                 |                  |        |             |        |       | 0.0004           |          |            |                               |                         |             |            |          |         |            |           |
| Staphylococcus aureus      | 2.39             |                 |                 |                  |        |             |        |       | 0.122            |          | 0.208      |                               | 1.93                    |             |            |          | 0.105   | 0.021      |           |
| Streptococcus pneumoniae   | 1.09             |                 |                 |                  | 0.028  | 0.368       | 0.018  |       | 0.048            |          | 0.145      |                               |                         | 0.06        |            |          | 0.429   |            |           |
| All pathogens              | 15.5             | 0.826           | 0.139           | 0.541            | 0.513  | 3.26        | 1.79   | 0.194 | 4.06             | 0.001    | 0.476      | 0.003                         | 0.023                   | 1.93        | 0.071      | 0.002    | 1.34    | 0.288      | 0.004     |
|                            | Resistance to 1+ | Aminoglycosides | Aminopenicillin | Anti-pseudomonal | BL-BLI | Carbapenems | 3GC    | 4GC   | Fluoroquinolones | Mono INH | Macrolides | MDR in S. Typhi and Paratyphi | MDR excluding XDR in TB | Methicillin | Penicillin | Mono RIF | TMP-SMX | Vancomycin | XDR in TB |

Counts

< 500

# Dominican Republic

Deaths (count) associated with bacterial antimicrobial resistance by pathogen–drug combinations, 2019

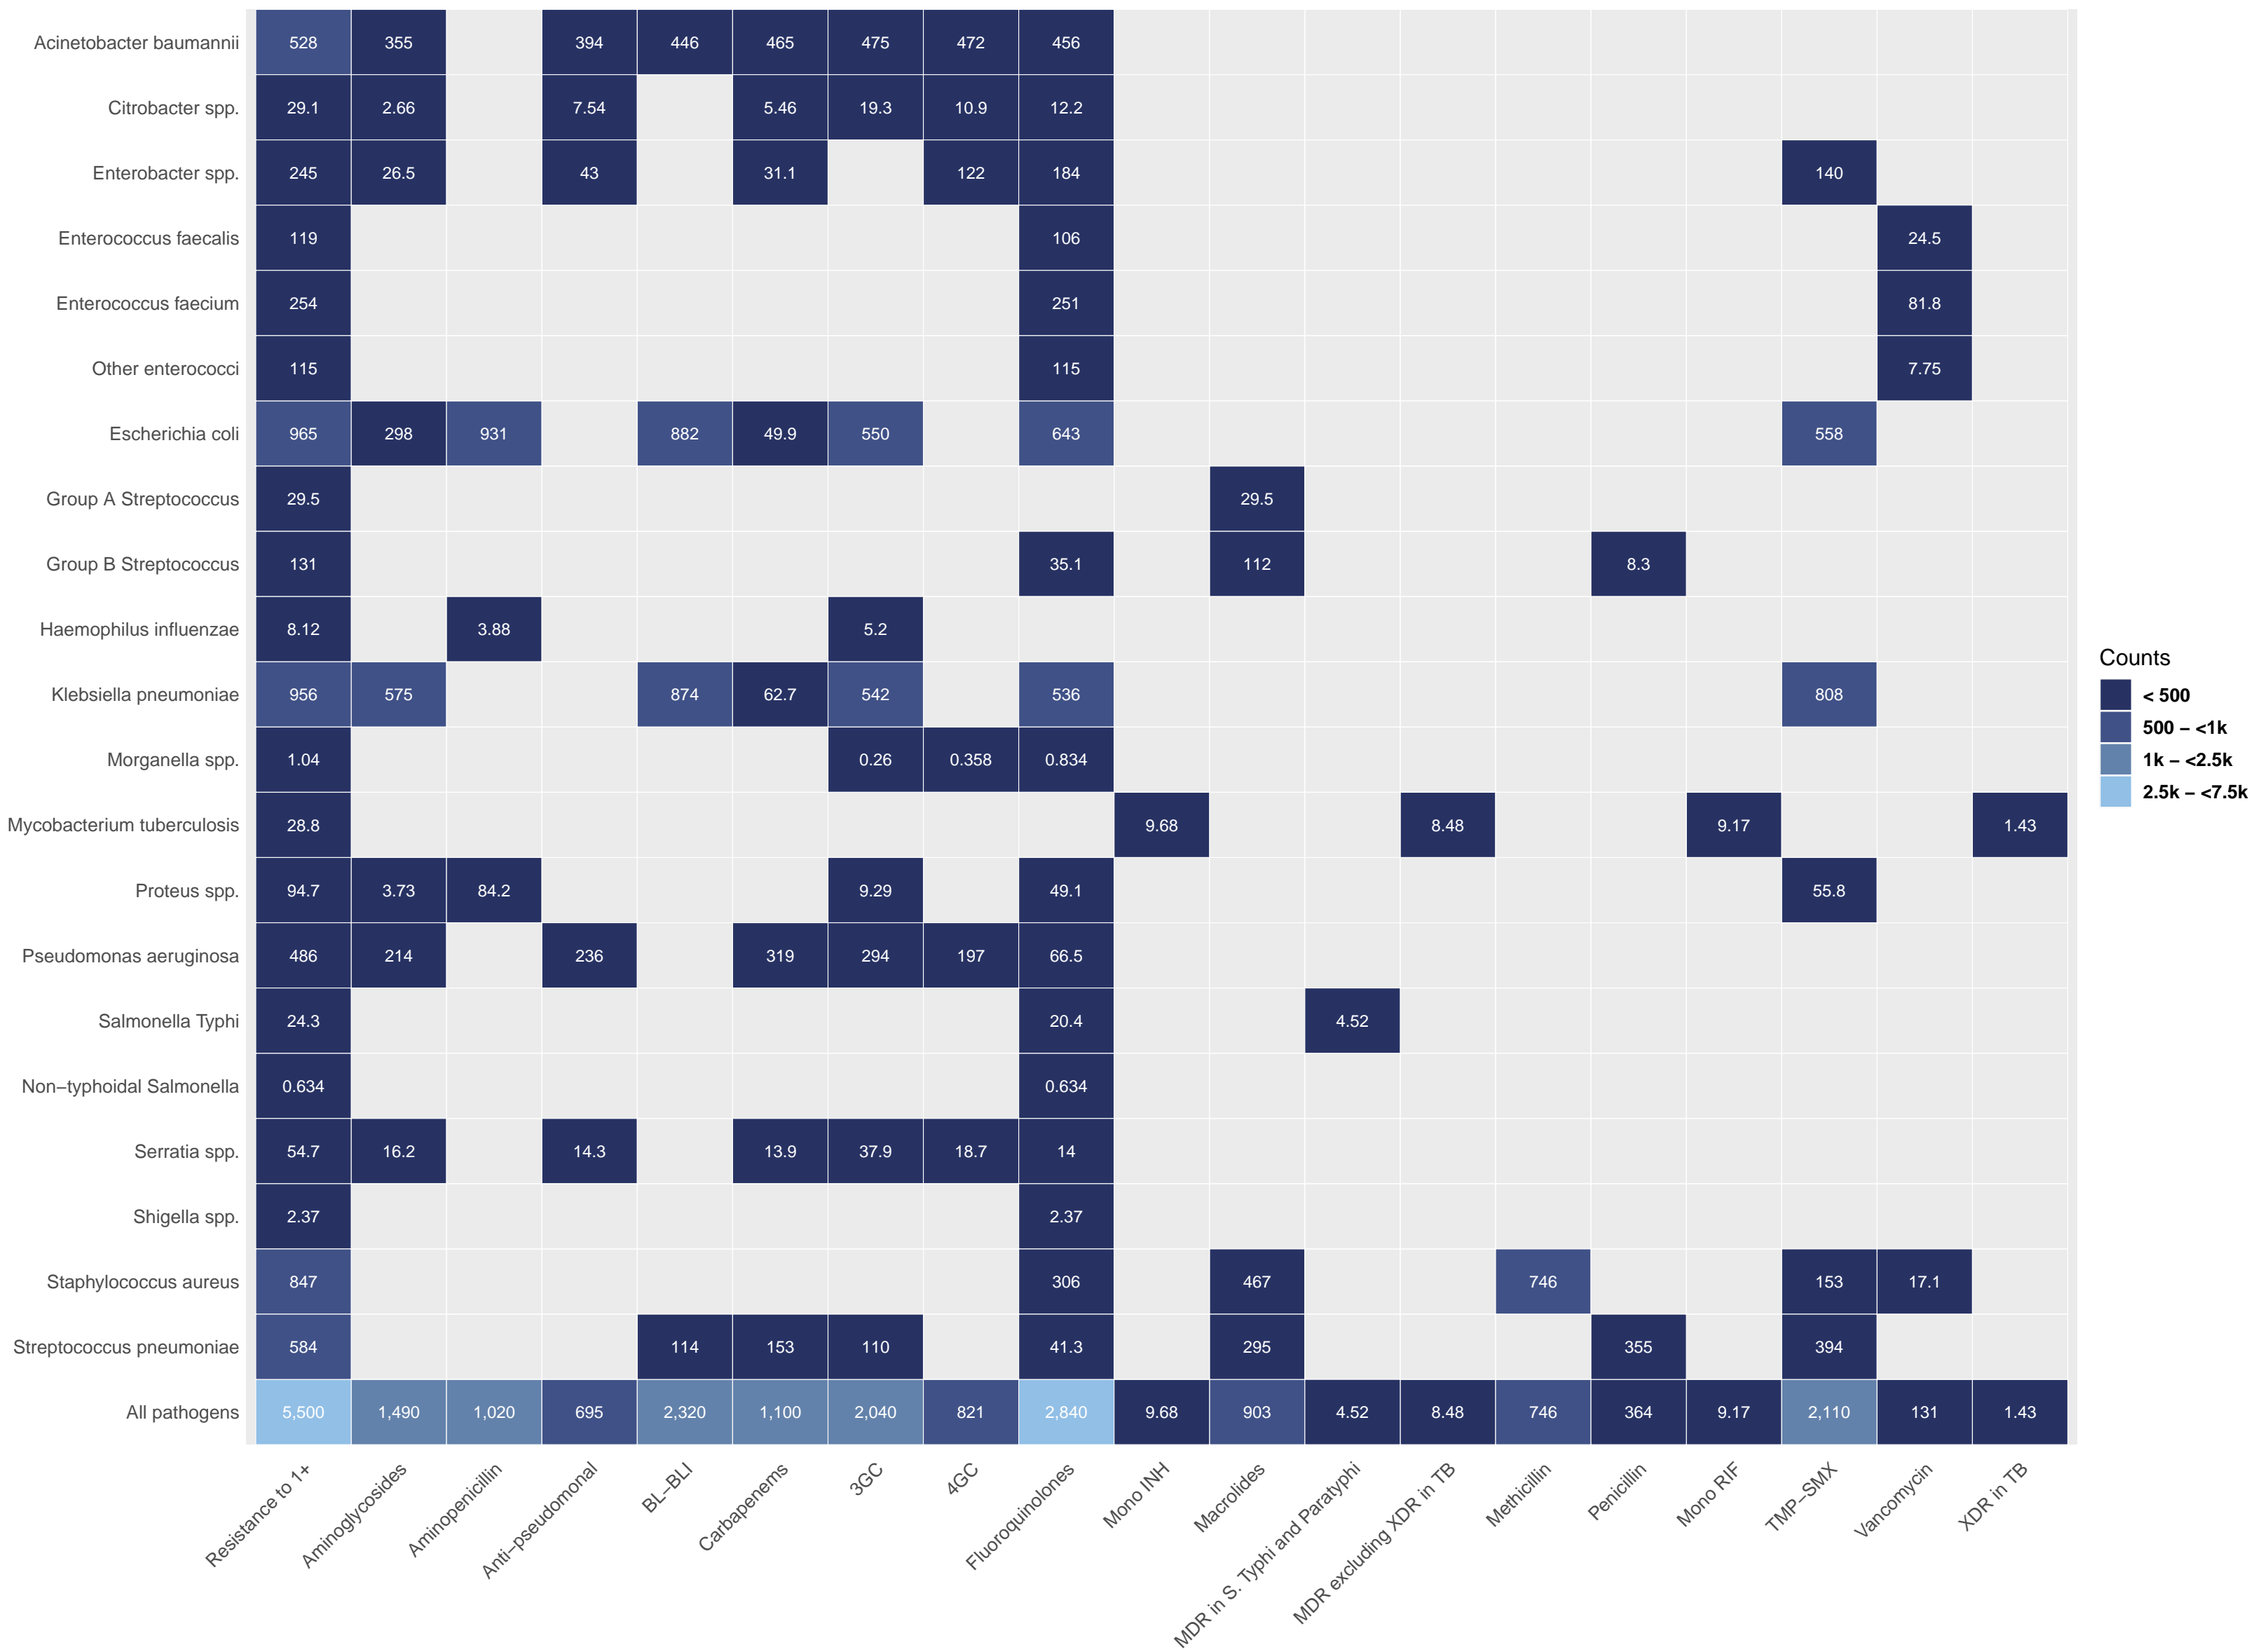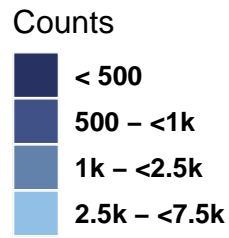

# Dominican Republic

Deaths (count) *attributable to* bacterial antimicrobial resistance by pathogen–drug combinations, 2019

|                            |                  |                 |                 |                  |        |             |       |       |                  |          |            |                               |                         |             |            |          |         |            |           |
|----------------------------|------------------|-----------------|-----------------|------------------|--------|-------------|-------|-------|------------------|----------|------------|-------------------------------|-------------------------|-------------|------------|----------|---------|------------|-----------|
| Acinetobacter baumannii    | 167              | 14.8            |                 | 1.56             | 2.01   | 78.1        | 8.86  | 5.09  | 56.2             |          |            |                               |                         |             |            |          |         |            |           |
| Citrobacter spp.           | 8.34             | 0.145           |                 | 1.5              |        | 1.38        | 2.15  | 1.11  | 2.06             |          |            |                               |                         |             |            |          |         |            |           |
| Enterobacter spp.          | 55.8             | 1.71            |                 | 3.4              |        | 6.45        |       | 10.1  | 26.3             |          |            |                               |                         |             |            |          | 7.87    |            |           |
| Enterococcus faecalis      | 33.9             |                 |                 |                  |        |             |       |       | 25.9             |          |            |                               |                         |             |            |          |         | 7.98       |           |
| Enterococcus faecium       | 66.3             |                 |                 |                  |        |             |       |       | 47.3             |          |            |                               |                         |             |            |          |         | 19         |           |
| Other enterococci          | 23.6             |                 |                 |                  |        |             |       |       | 22.2             |          |            |                               |                         |             |            |          |         | 1.38       |           |
| Escherichia coli           | 244              | 17.8            | 4.88            |                  | 39.6   | 10.6        | 74    |       | 67.3             |          |            |                               |                         |             |            |          |         | 29.9       |           |
| Group A Streptococcus      | 2.84             |                 |                 |                  |        |             |       |       |                  |          | 2.84       |                               |                         |             |            |          |         |            |           |
| Group B Streptococcus      | 18.8             |                 |                 |                  |        |             |       |       | 6.04             |          | 11.2       |                               |                         |             | 1.51       |          |         |            |           |
| Haemophilus influenzae     | 2.09             |                 | 0.542           |                  |        |             | 1.55  |       |                  |          |            |                               |                         |             |            |          |         |            |           |
| Klebsiella pneumoniae      | 229              | 41.6            |                 |                  | 32.9   | 16.8        | 65.6  |       | 33.2             |          |            |                               |                         |             |            |          |         | 38.8       |           |
| Morganella spp.            | 0.241            |                 |                 |                  |        |             | 0.025 | 0.065 | 0.151            |          |            |                               |                         |             |            |          |         |            |           |
| Mycobacterium tuberculosis | 10.1             |                 |                 |                  |        |             |       |       |                  | 1.55     |            |                               | 5.05                    |             |            | 2.58     |         |            | 0.873     |
| Proteus spp.               | 10.6             | 0.236           | 2.11            |                  |        |             | 2.32  |       | 3.78             |          |            |                               |                         |             |            |          |         | 2.1        |           |
| Pseudomonas aeruginosa     | 120              | 6.68            |                 | 17.9             |        | 67.6        | 15.9  | 4.08  | 7.43             |          |            |                               |                         |             |            |          |         |            |           |
| Salmonella Typhi           | 4.71             |                 |                 |                  |        |             |       |       | 4.14             |          |            | 0.565                         |                         |             |            |          |         |            |           |
| Non-typhoidal Salmonella   | 0.132            |                 |                 |                  |        |             |       |       | 0.132            |          |            |                               |                         |             |            |          |         |            |           |
| Serratia spp.              | 14.2             | 0.963           |                 | 2.84             |        | 3.77        | 3.45  | 1.63  | 1.53             |          |            |                               |                         |             |            |          |         |            |           |
| Shigella spp.              | 0.49             |                 |                 |                  |        |             |       |       | 0.49             |          |            |                               |                         |             |            |          |         |            |           |
| Staphylococcus aureus      | 252              |                 |                 |                  |        |             |       |       | 13.7             |          | 17.2       |                               |                         | 203         |            |          |         | 13.3       | 4.11      |
| Streptococcus pneumoniae   | 123              |                 |                 |                  | 2.74   | 34.5        | 6.37  |       | 5                |          | 11.7       |                               |                         |             | 29.1       |          |         | 34         |           |
| All pathogens              | 1,390            | 83.9            | 7.54            | 27.2             | 77.2   | 219         | 180   | 22    | 323              | 1.55     | 42.9       | 0.565                         | 5.05                    | 203         | 30.6       | 2.58     | 126     | 32.5       | 0.873     |
|                            | Resistance to 1+ | Aminoglycosides | Aminopenicillin | Anti-pseudomonal | BL-BLI | Carbapenems | 3GC   | 4GC   | Fluoroquinolones | Mono INH | Macrolides | MDR in S. Typhi and Paratyphi | MDR excluding XDR in TB | Methicillin | Penicillin | Mono RIF | TMP-SMX | Vancomycin | XDR in TB |

Counts

< 500

1k – <2.5k

# Ecuador

Deaths (count) associated with bacterial antimicrobial resistance by pathogen–drug combinations, 2019

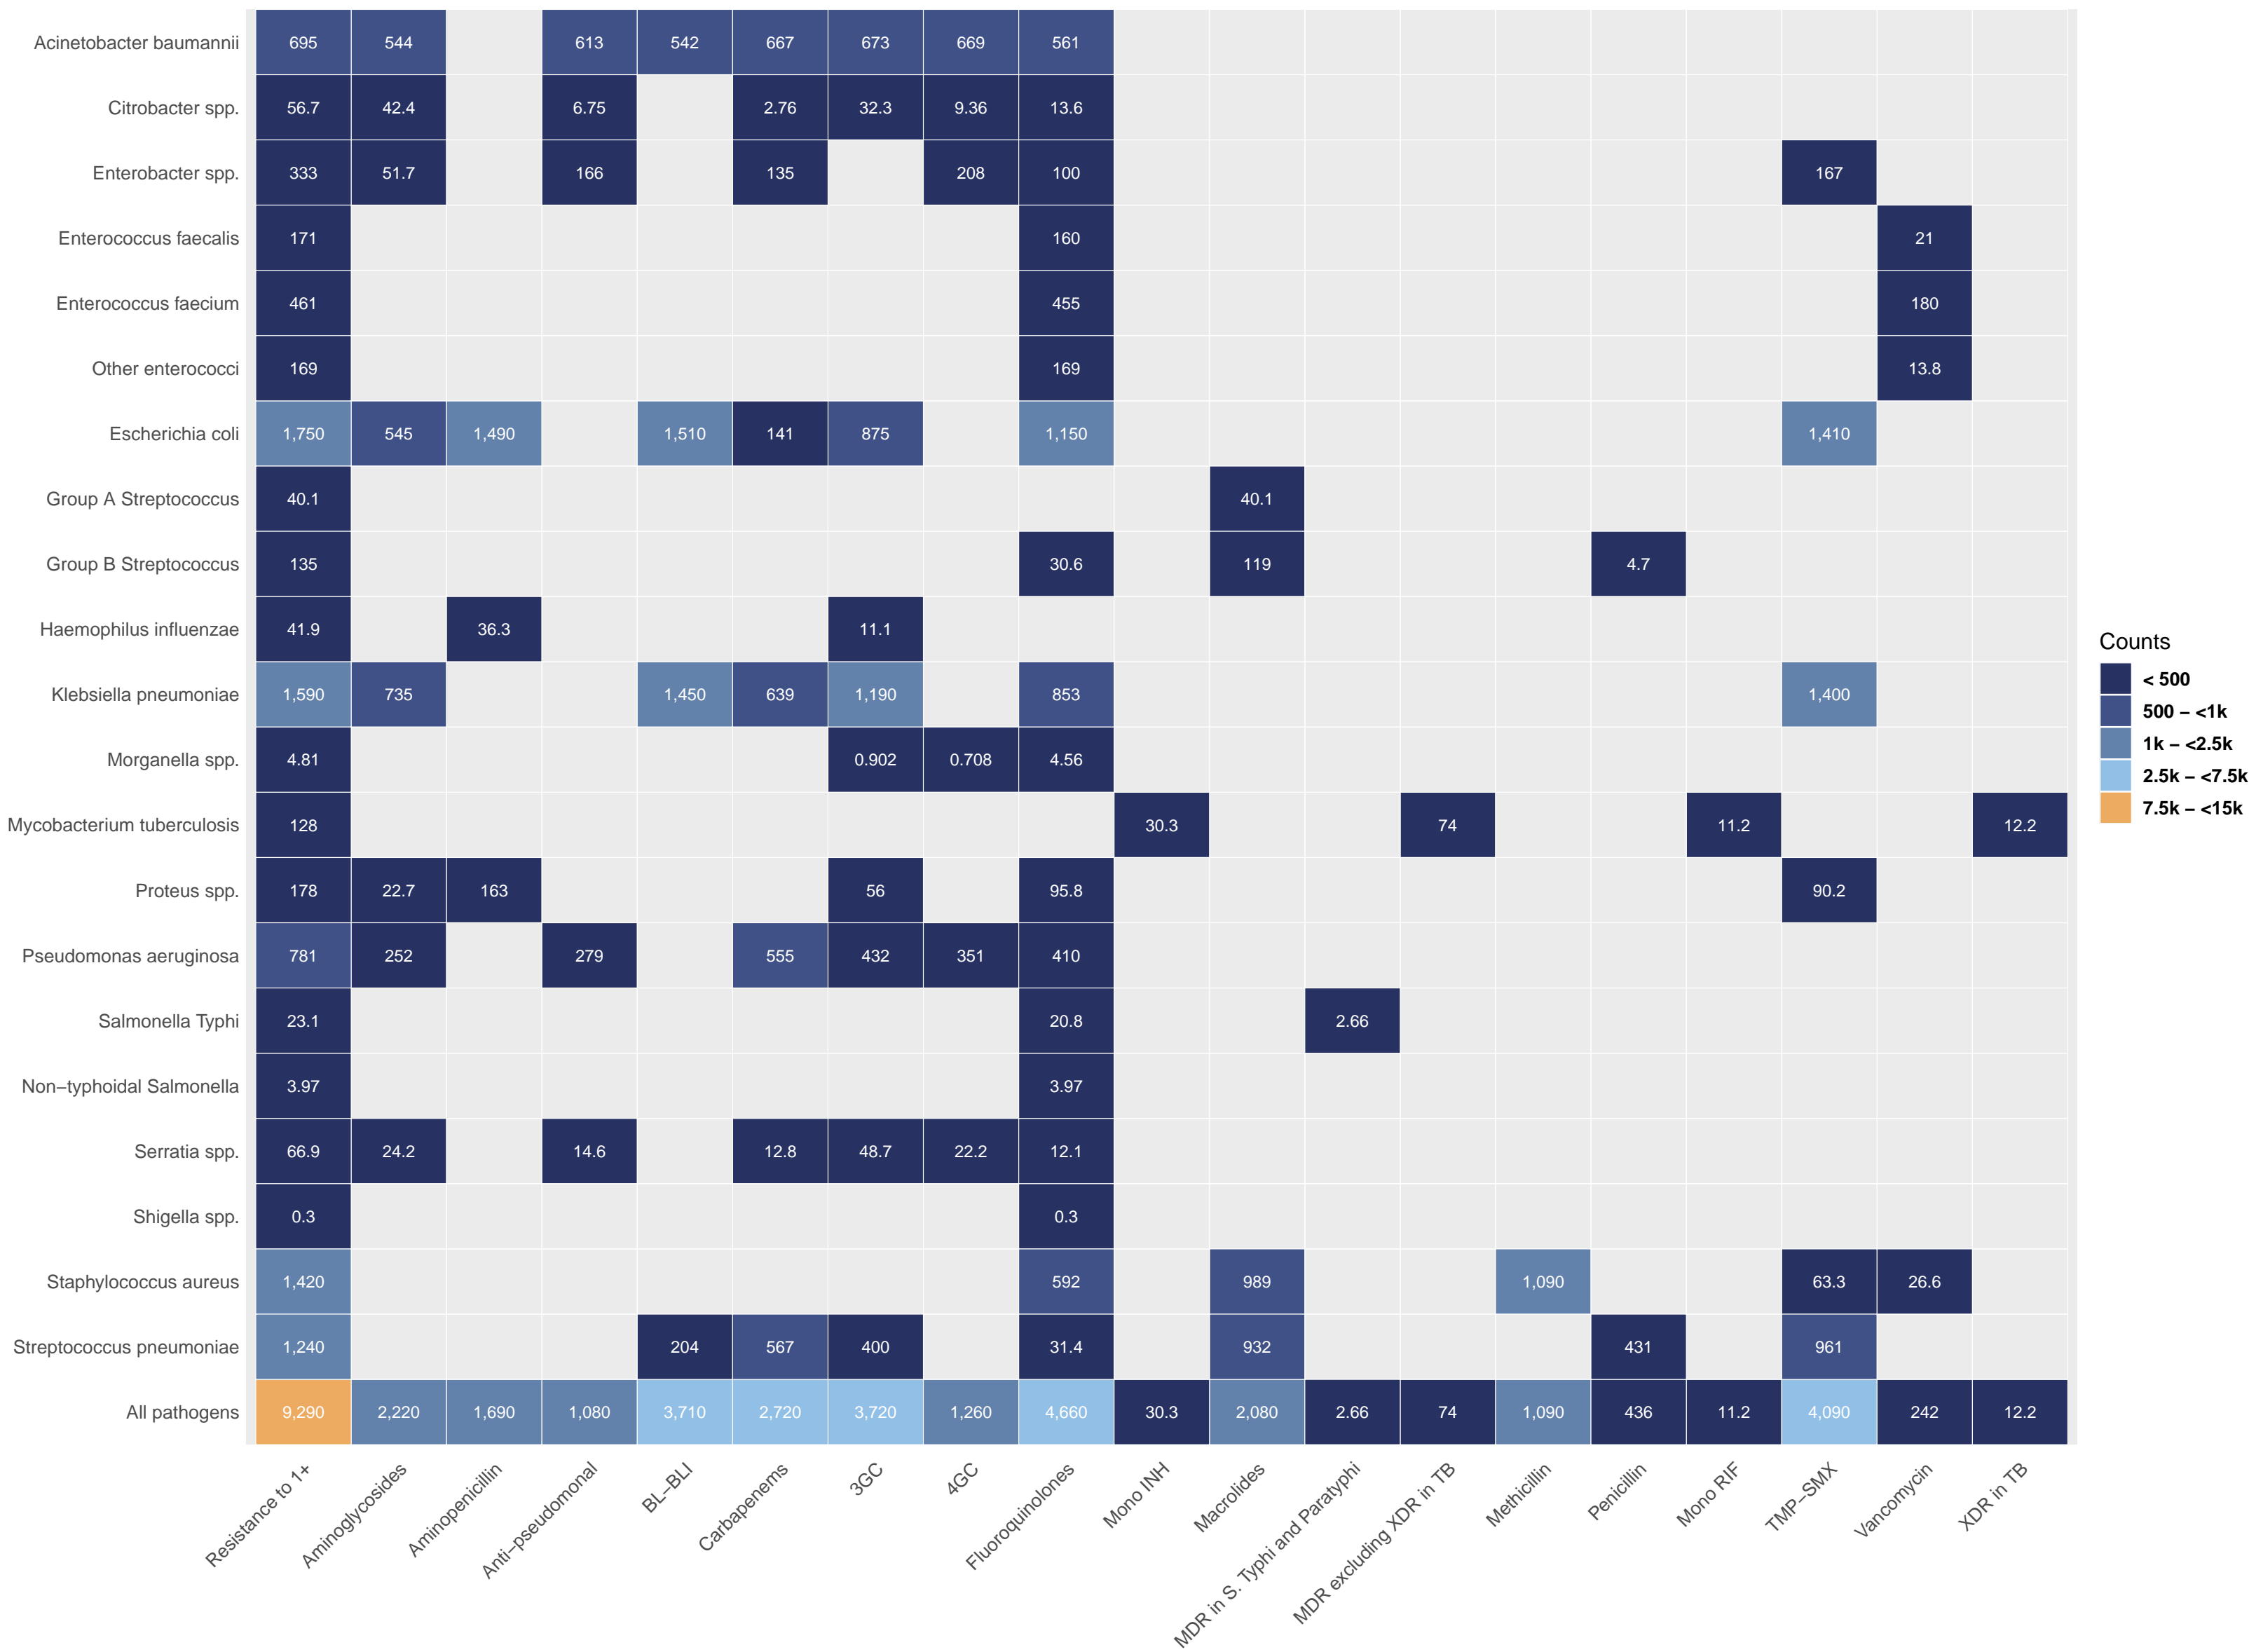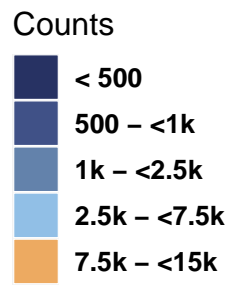



# Ecuador

Deaths (count) *attributable to* bacterial antimicrobial resistance by pathogen–drug combinations, 2019

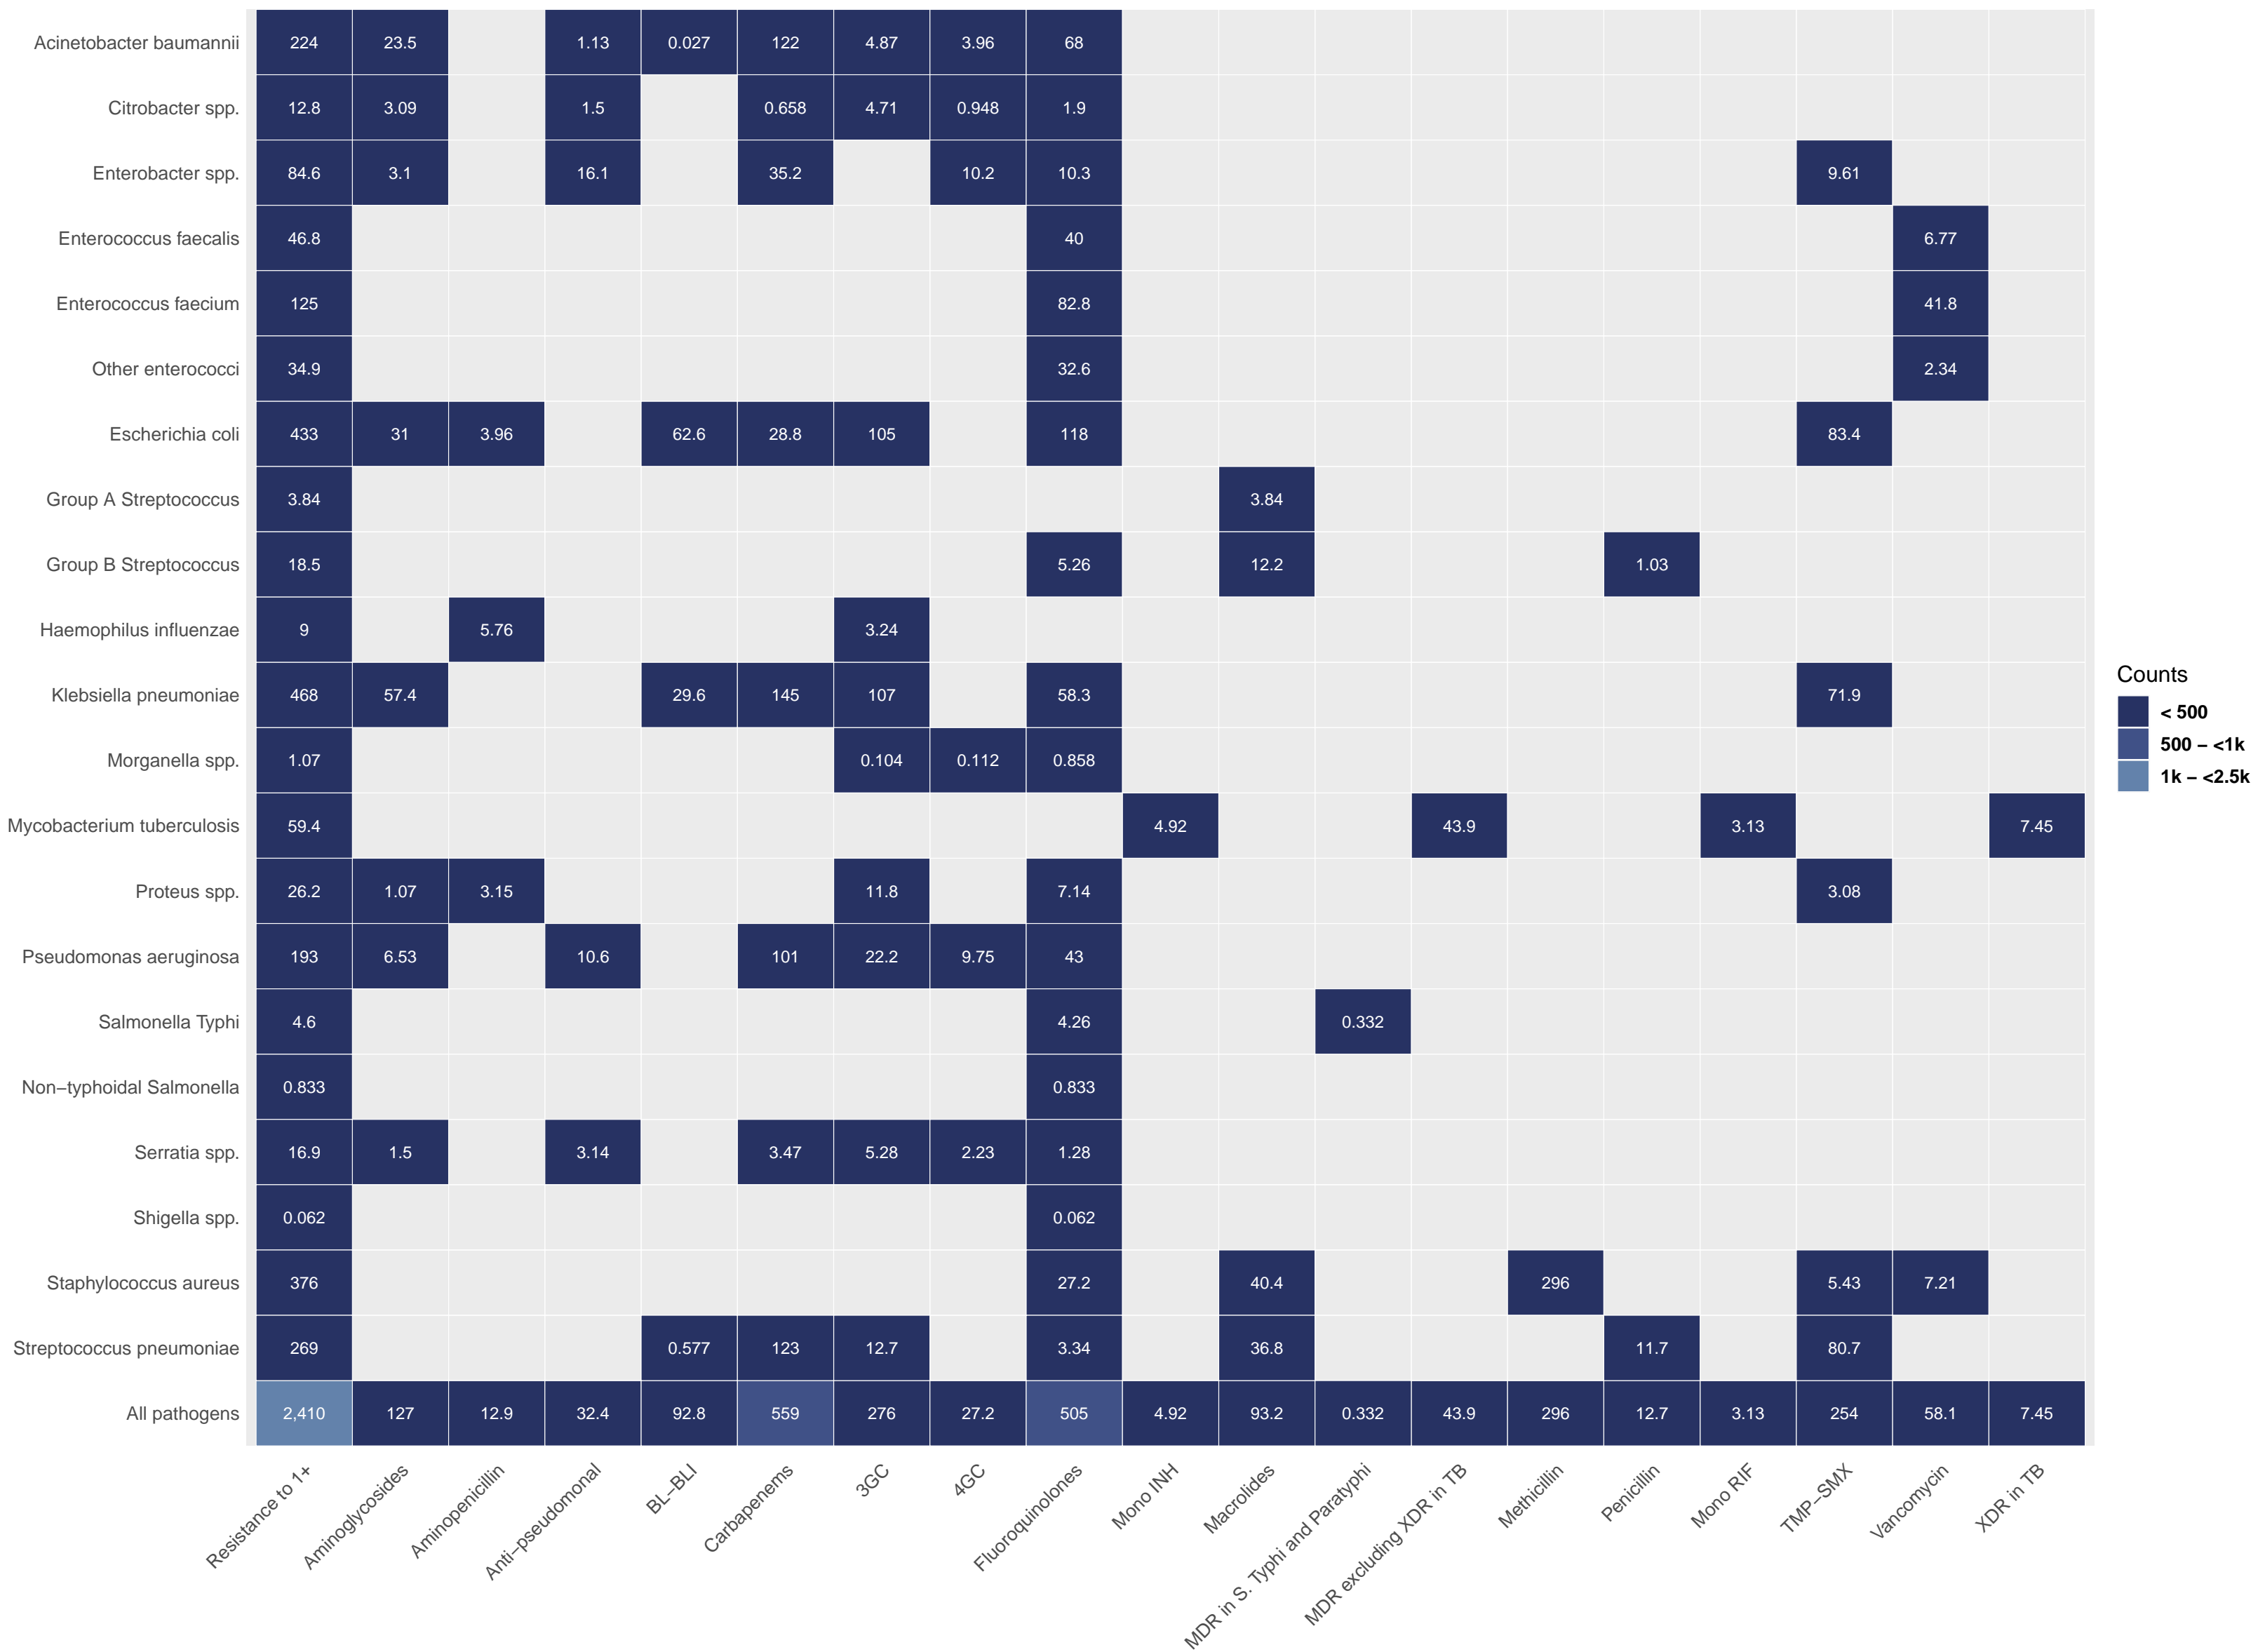

Counts

- < 500
- 500 – <1k
- 1k – <2.5k

# El Salvador

Deaths (count) associated with bacterial antimicrobial resistance by pathogen–drug combinations, 2019

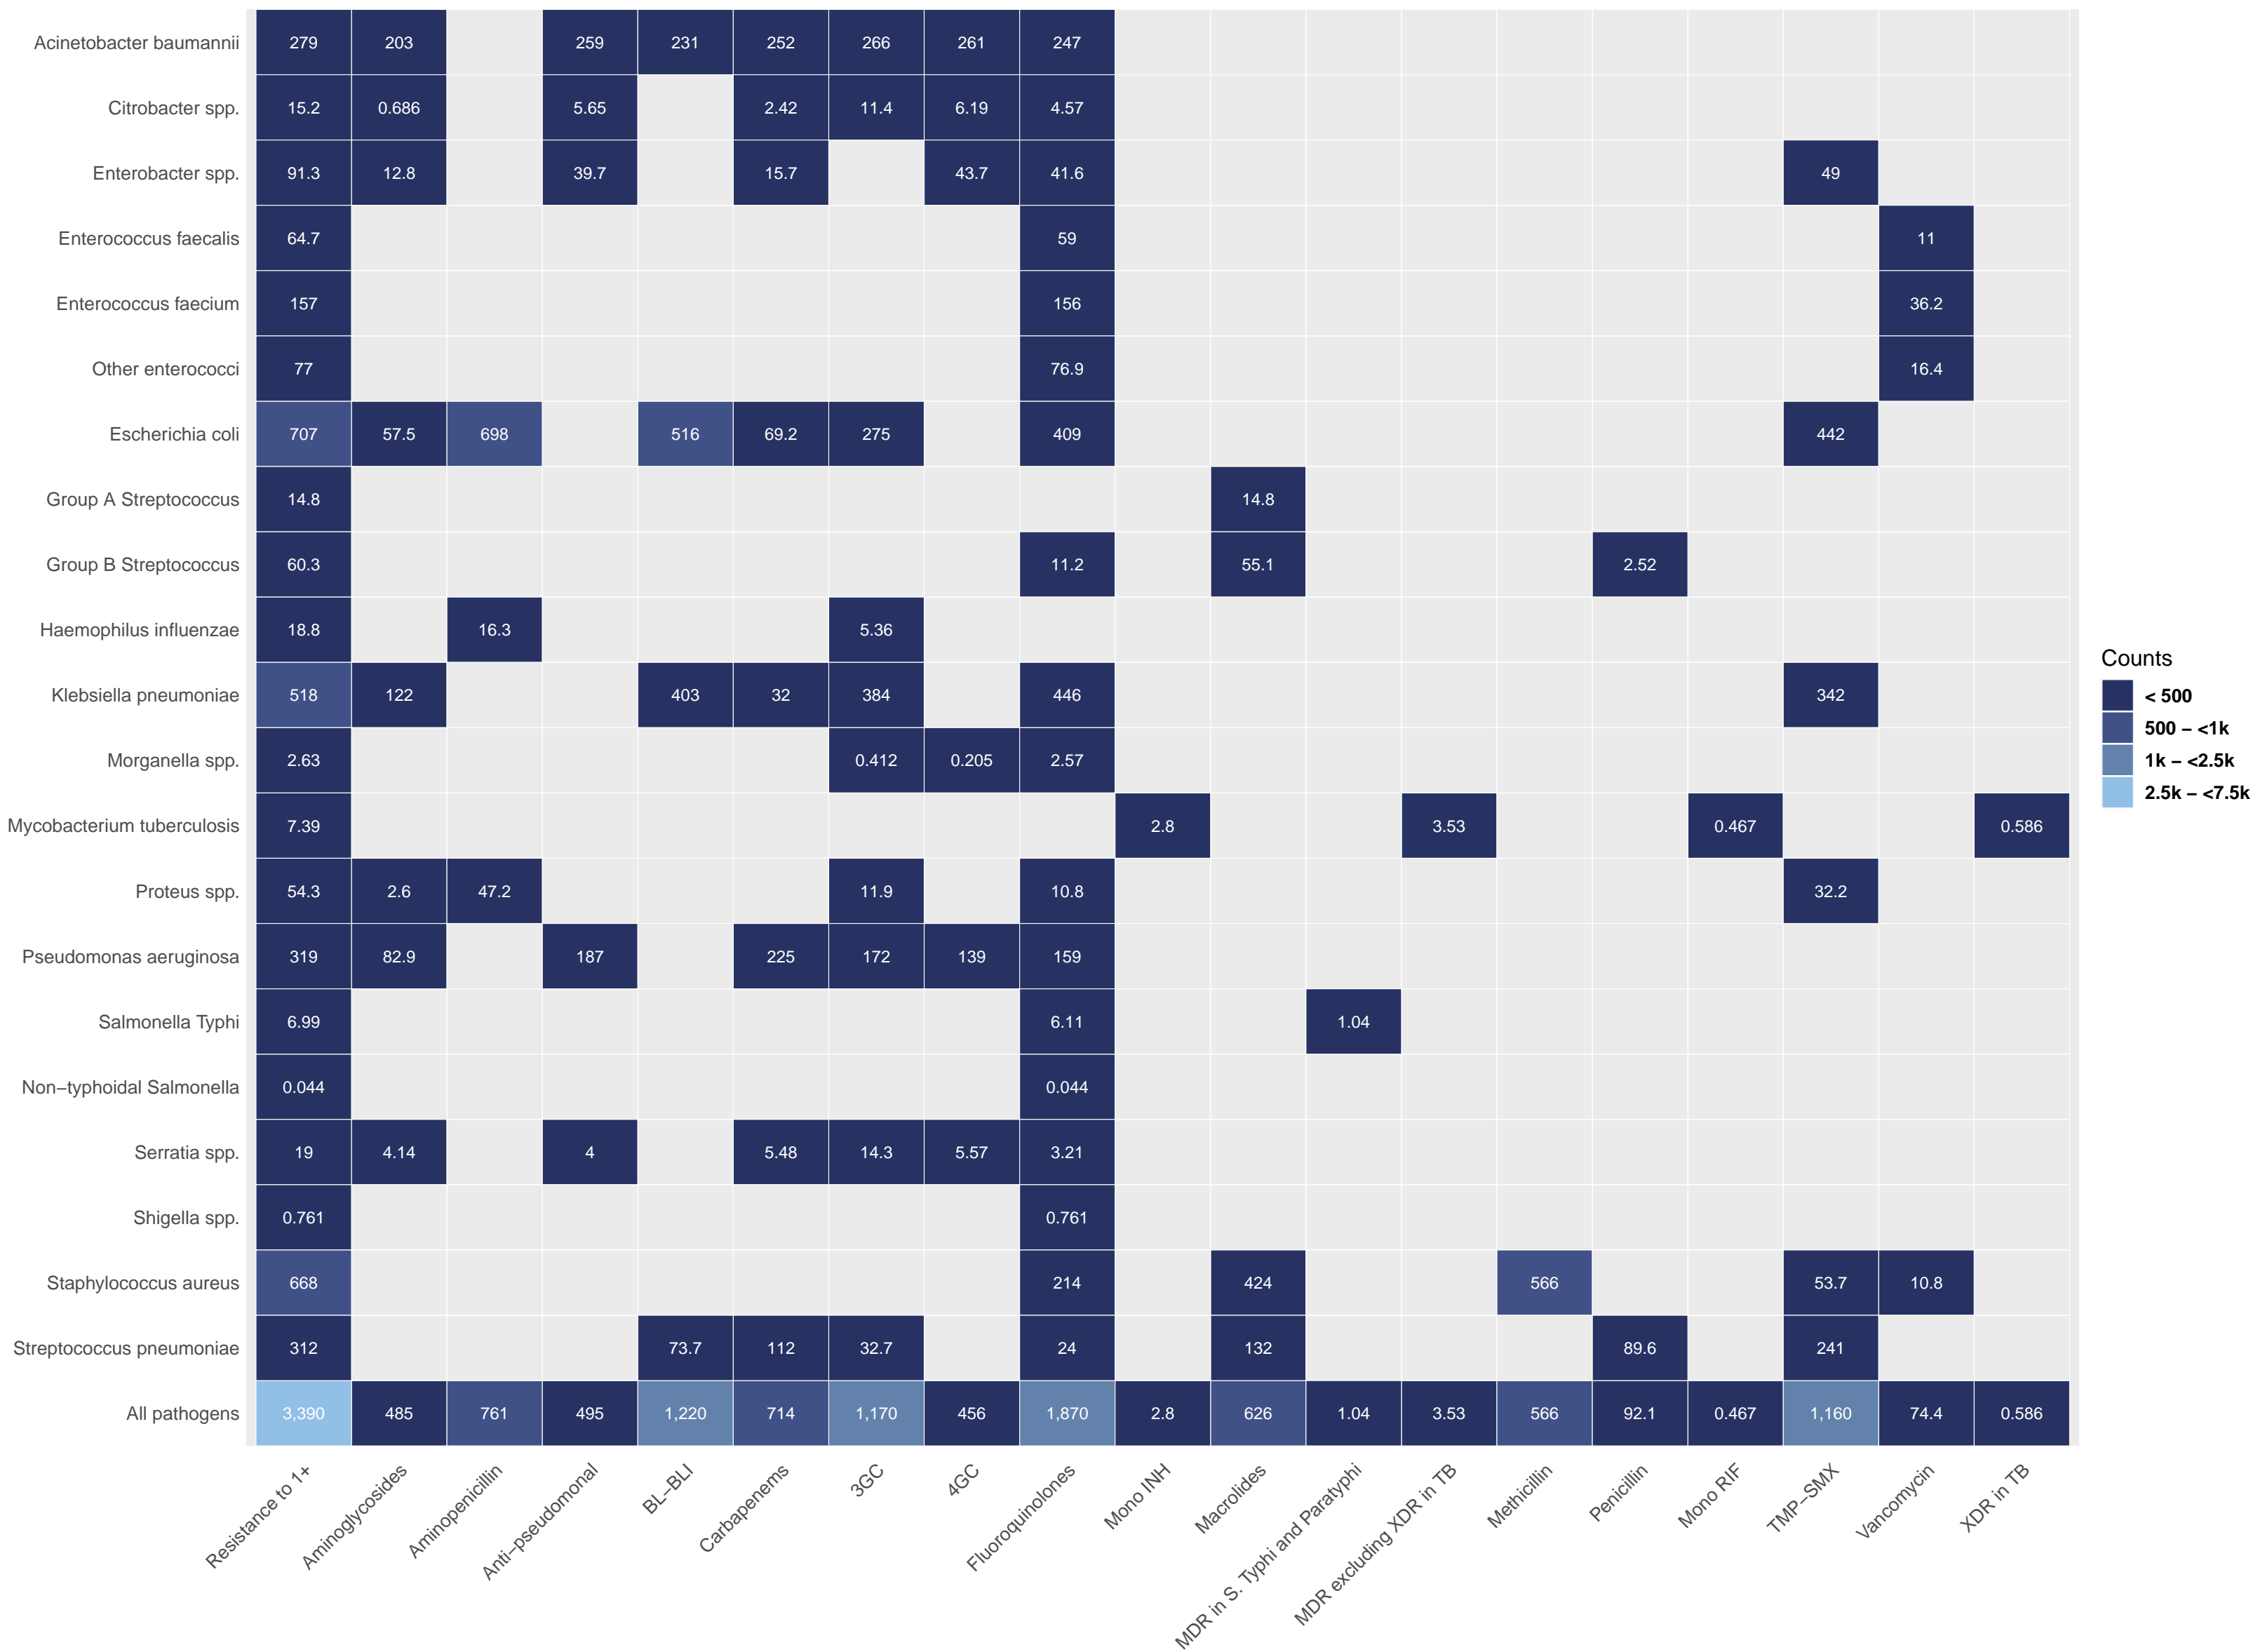

# El Salvador

Deaths (count) *attributable to* bacterial antimicrobial resistance by pathogen–drug combinations, 2019

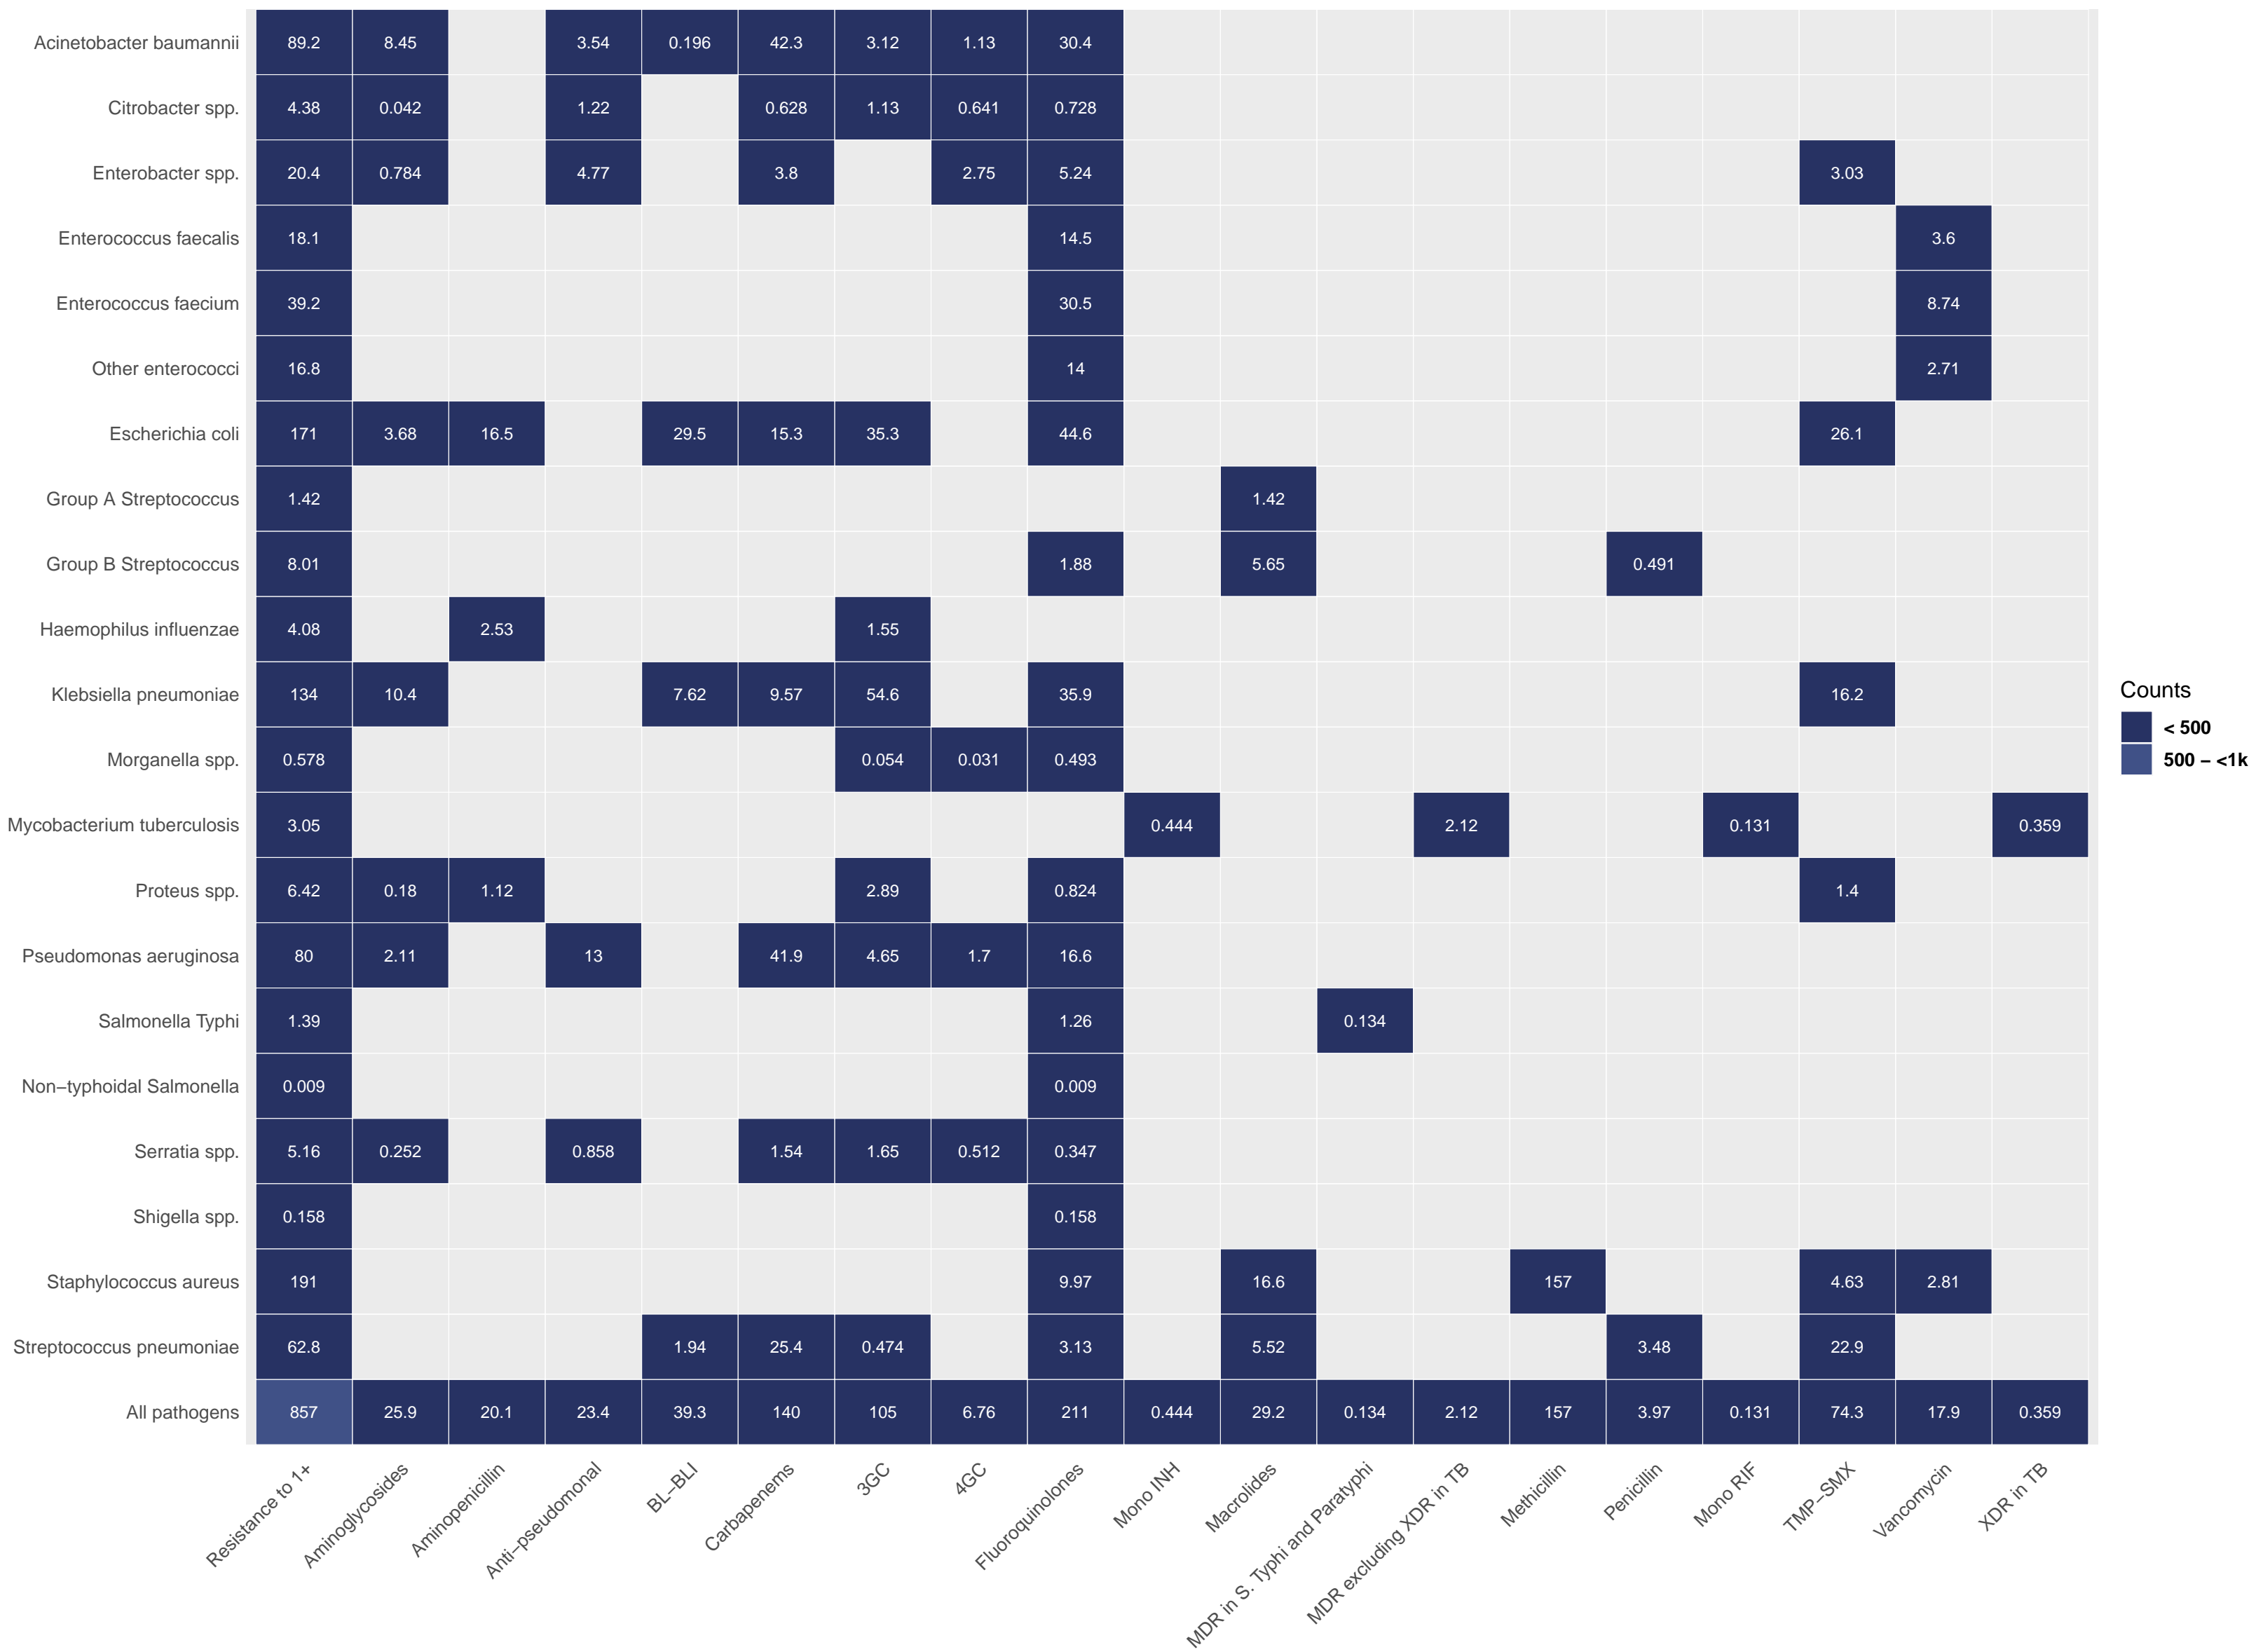

# Grenada

Deaths (count) associated with bacterial antimicrobial resistance by pathogen–drug combinations, 2019

|                            |                  |                 |                 |                  |        |             |       |       |                  |          |            |                               |                         |             |            |          |         |            |           |
|----------------------------|------------------|-----------------|-----------------|------------------|--------|-------------|-------|-------|------------------|----------|------------|-------------------------------|-------------------------|-------------|------------|----------|---------|------------|-----------|
| Acinetobacter baumannii    | 11.9             | 7.84            |                 | 11.3             | 9.12   | 9.45        | 9.55  | 9.91  | 10.6             |          |            |                               |                         |             |            |          |         |            |           |
| Citrobacter spp.           | 0.623            | 0.058           |                 | 0.146            |        | 0.098       | 0.431 | 0.301 | 0.251            |          |            |                               |                         |             |            |          |         |            |           |
| Enterobacter spp.          | 4.22             | 0.794           |                 | 1.6              |        | 1.02        |       | 2.18  | 1.96             |          |            |                               |                         |             |            |          | 2.81    |            |           |
| Enterococcus faecalis      | 1.49             |                 |                 |                  |        |             |       |       | 1.38             |          |            |                               |                         |             |            |          |         | 0.248      |           |
| Enterococcus faecium       | 2.93             |                 |                 |                  |        |             |       |       | 2.91             |          |            |                               |                         |             |            |          |         | 0.988      |           |
| Other enterococci          | 2.16             |                 |                 |                  |        |             |       |       | 2.16             |          |            |                               |                         |             |            |          |         | 0.132      |           |
| Escherichia coli           | 10.9             | 1.87            | 10              |                  | 8.76   | 0.898       | 6.1   |       | 7.12             |          |            |                               |                         |             |            |          |         | 7.38       |           |
| Group A Streptococcus      | 0.812            |                 |                 |                  |        |             |       |       |                  |          | 0.812      |                               |                         |             |            |          |         |            |           |
| Group B Streptococcus      | 1.3              |                 |                 |                  |        |             |       |       | 0.376            |          | 1.08       |                               |                         | 0.098       |            |          |         |            |           |
| Haemophilus influenzae     | 0.147            |                 | 0.088           |                  |        |             | 0.079 |       |                  |          |            |                               |                         |             |            |          |         |            |           |
| Klebsiella pneumoniae      | 8.52             | 2.9             |                 |                  | 7.1    | 0.802       | 5.89  |       | 4.81             |          |            |                               |                         |             |            |          |         | 6.75       |           |
| Morganella spp.            | 0.058            |                 |                 |                  |        |             | 0.011 | 0.011 | 0.054            |          |            |                               |                         |             |            |          |         |            |           |
| Mycobacterium tuberculosis | 0.014            |                 |                 |                  |        |             |       |       |                  | 0.003    |            |                               | 0.009                   |             |            | 0.0008   |         |            | 0.002     |
| Proteus spp.               | 1.49             | 0.107           | 1.31            |                  |        |             | 0.305 |       | 0.589            |          |            |                               |                         |             |            |          |         | 1.01       |           |
| Pseudomonas aeruginosa     | 5.76             | 3.07            |                 | 2.21             |        | 3.67        | 2.49  | 1.86  | 3.33             |          |            |                               |                         |             |            |          |         |            |           |
| Salmonella Typhi           | 0.091            |                 |                 |                  |        |             |       |       | 0.072            |          |            | 0.023                         |                         |             |            |          |         |            |           |
| Non-typhoidal Salmonella   | 0.011            |                 |                 |                  |        |             |       |       | 0.011            |          |            |                               |                         |             |            |          |         |            |           |
| Serratia spp.              | 0.79             | 0.241           |                 | 0.21             |        | 0.199       | 0.491 | 0.228 | 0.342            |          |            |                               |                         |             |            |          |         |            |           |
| Shigella spp.              | 0.001            |                 |                 |                  |        |             |       |       | 0.001            |          |            |                               |                         |             |            |          |         |            |           |
| Staphylococcus aureus      | 10.6             |                 |                 |                  |        |             |       |       | 3.13             |          | 6.82       |                               | 9.14                    |             |            |          |         | 2.38       | 0.195     |
| Streptococcus pneumoniae   | 8.34             |                 |                 |                  | 1.74   | 2.27        | 2.45  |       | 0.641            |          | 5.13       |                               |                         | 3.66        |            |          |         | 6          |           |
| All pathogens              | 72.1             | 16.9            | 11.4            | 15.5             | 26.7   | 18.4        | 27.8  | 14.5  | 39.7             | 0.003    | 13.8       | 0.023                         | 0.009                   | 9.14        | 3.76       | 0.0008   | 26.3    | 1.56       | 0.002     |
|                            | Resistance to 1+ | Aminoglycosides | Aminopenicillin | Anti-pseudomonal | BL-BLI | Carbapenems | 3GC   | 4GC   | Fluoroquinolones | Mono INH | Macrolides | MDR in S. Typhi and Paratyphi | MDR excluding XDR in TB | Methicillin | Penicillin | Mono RIF | TMP-SMX | Vancomycin | XDR in TB |

Counts

< 500

# Grenada

Deaths (count) *attributable to* bacterial antimicrobial resistance by pathogen–drug combinations, 2019

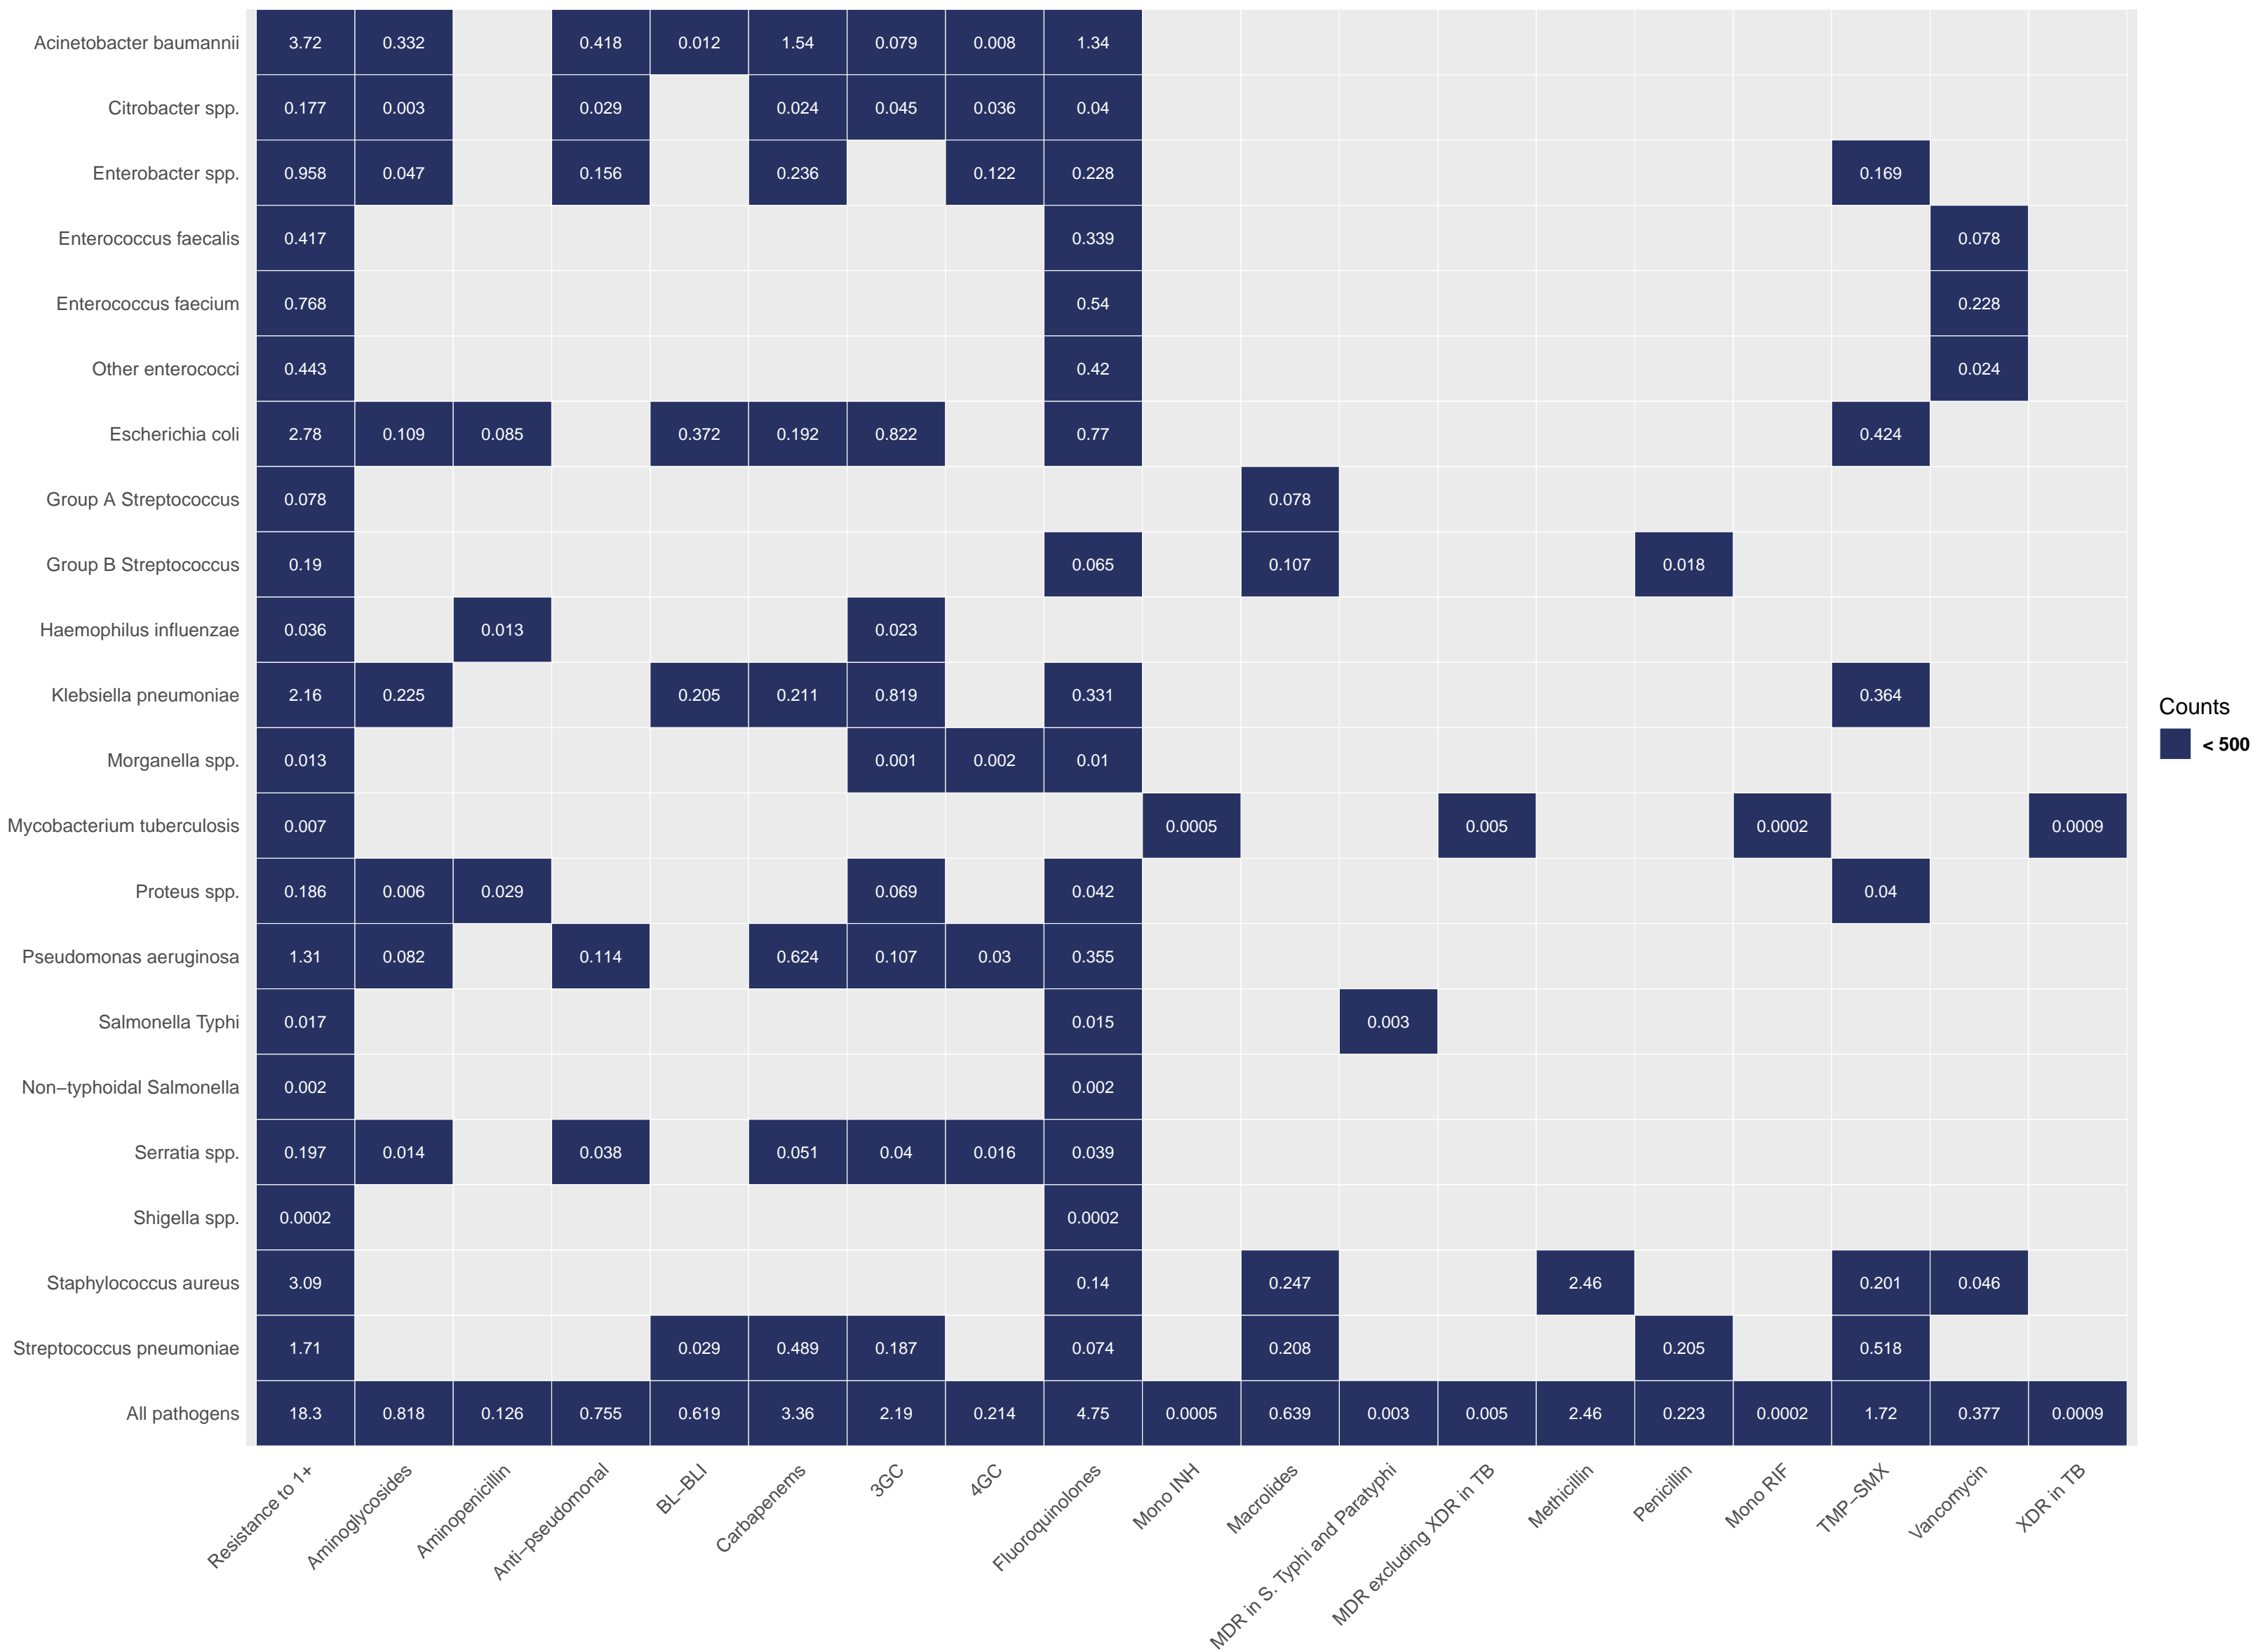

Counts  
  < 500

# Guatemala

Deaths (count) associated with bacterial antimicrobial resistance by pathogen–drug combinations, 2019

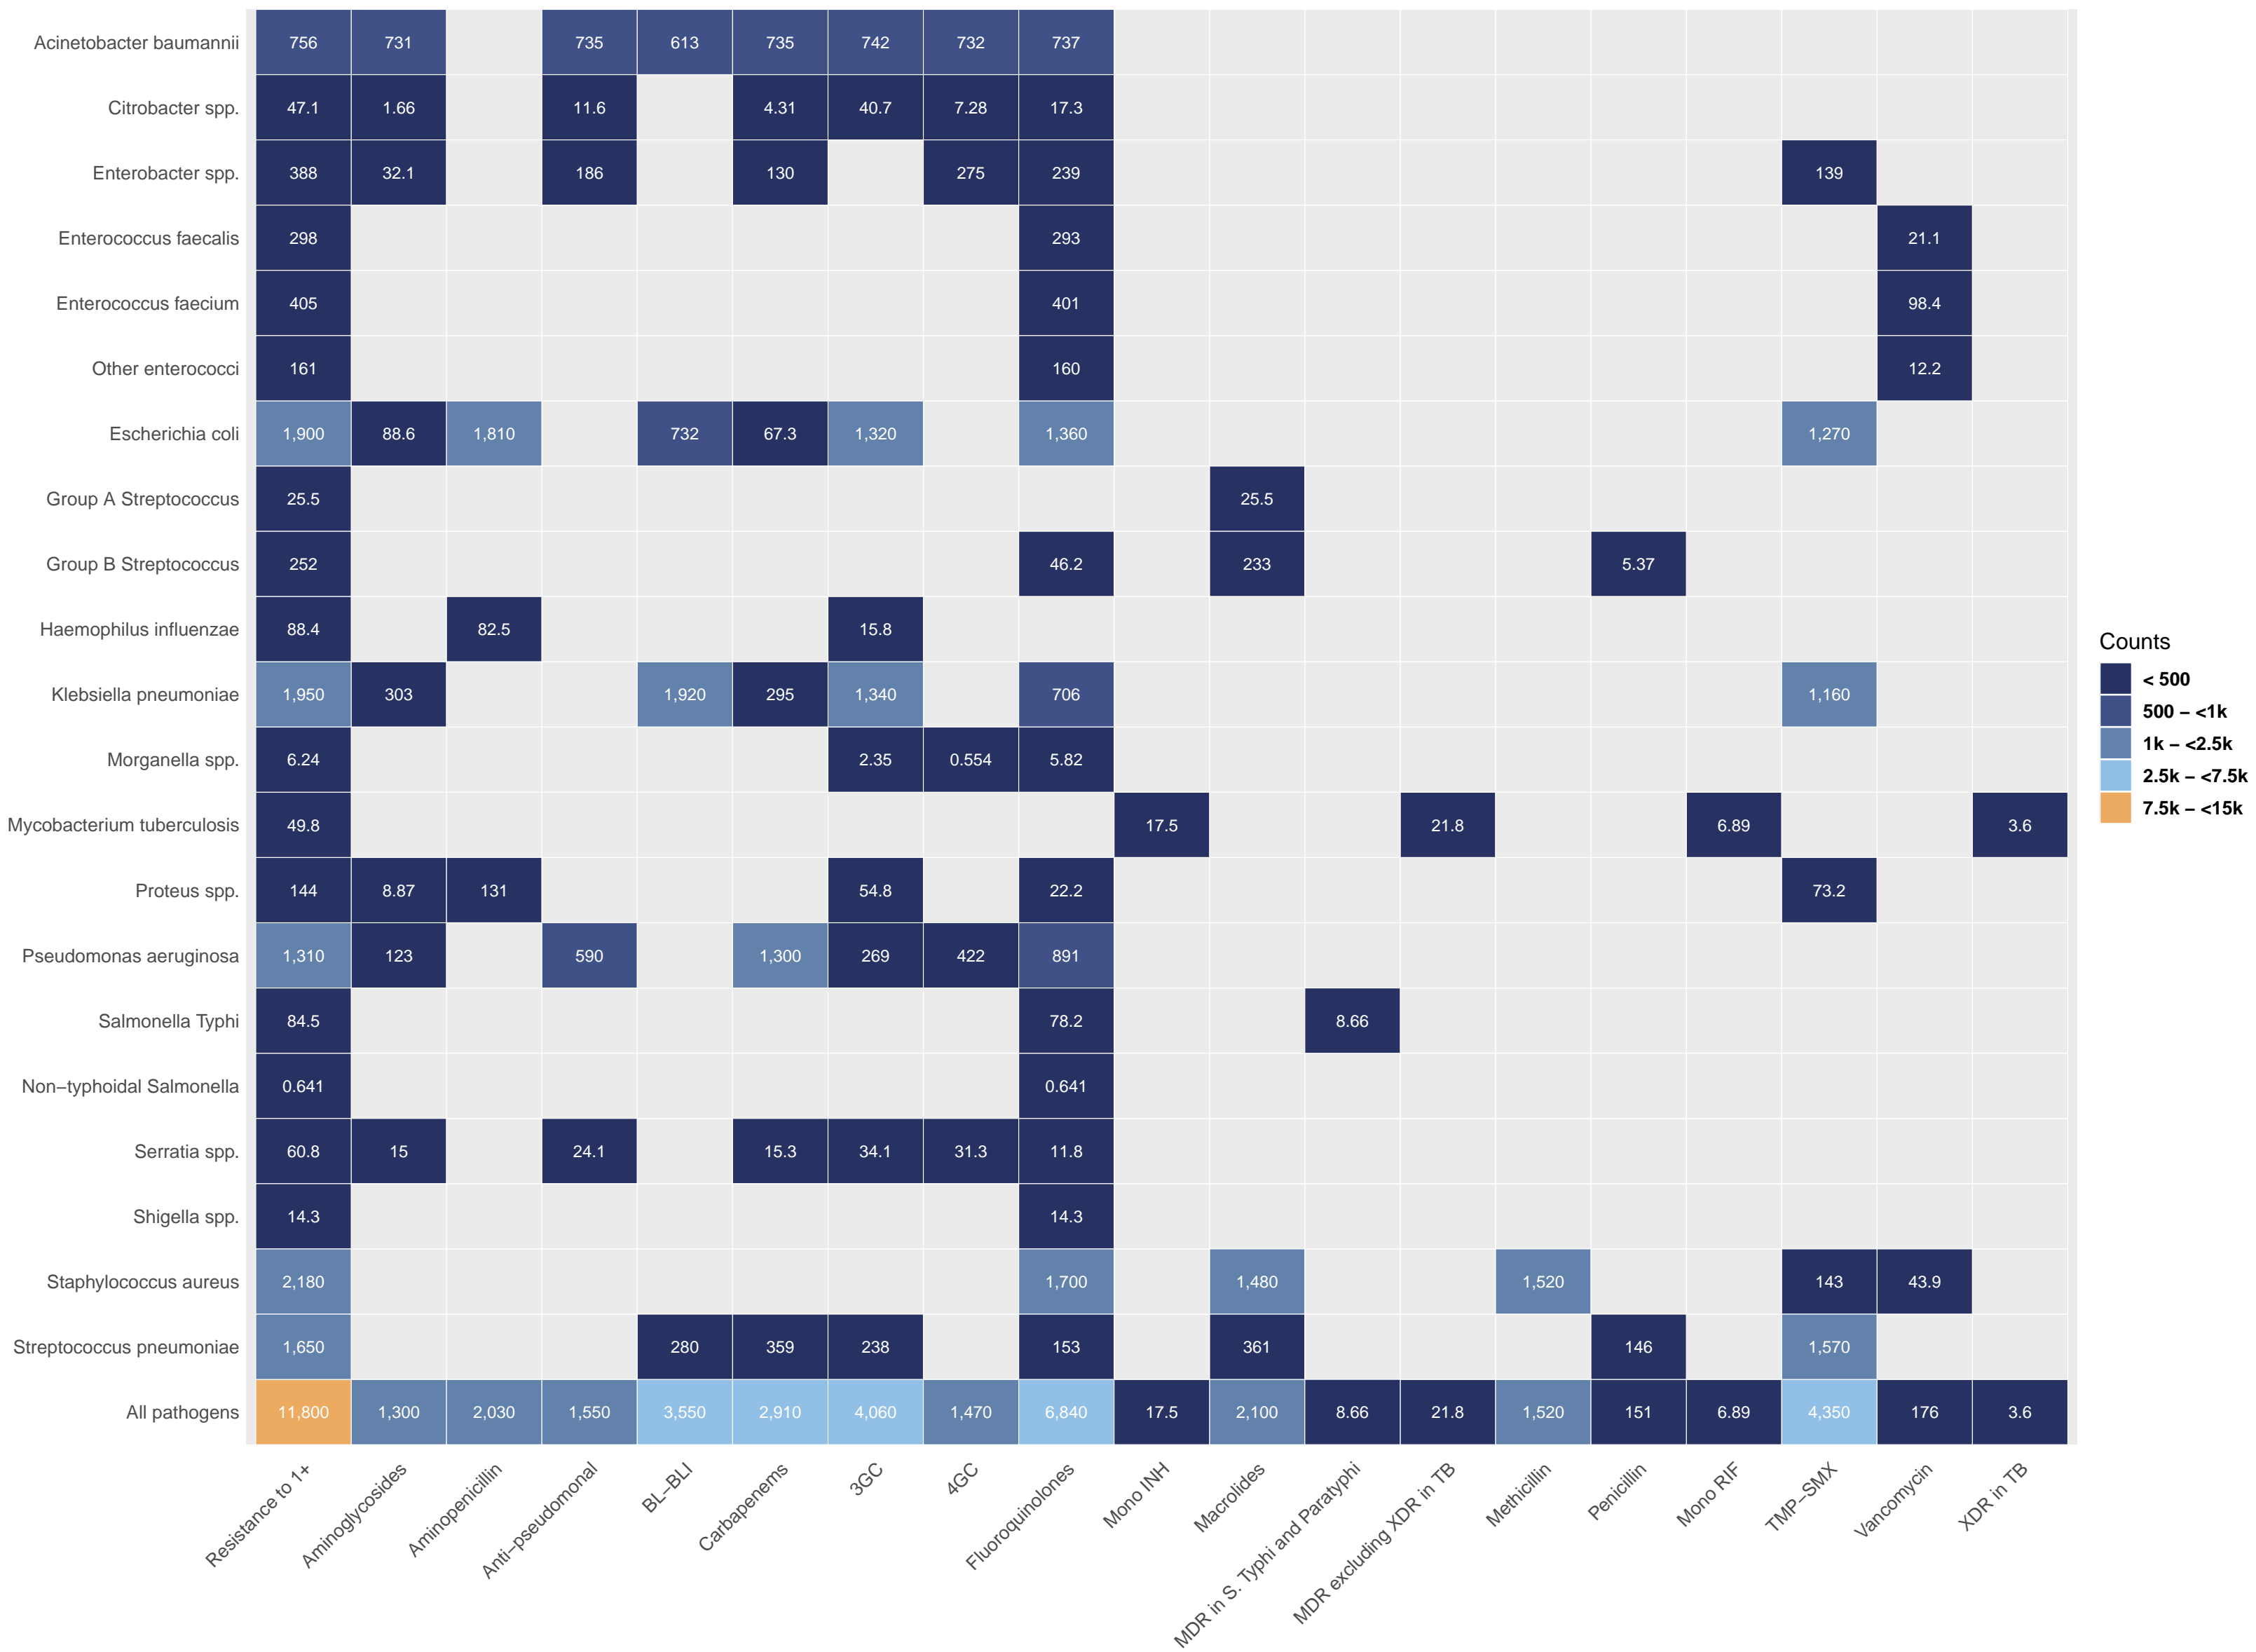

# Guatemala

Deaths (count) *attributable to* bacterial antimicrobial resistance by pathogen–drug combinations, 2019

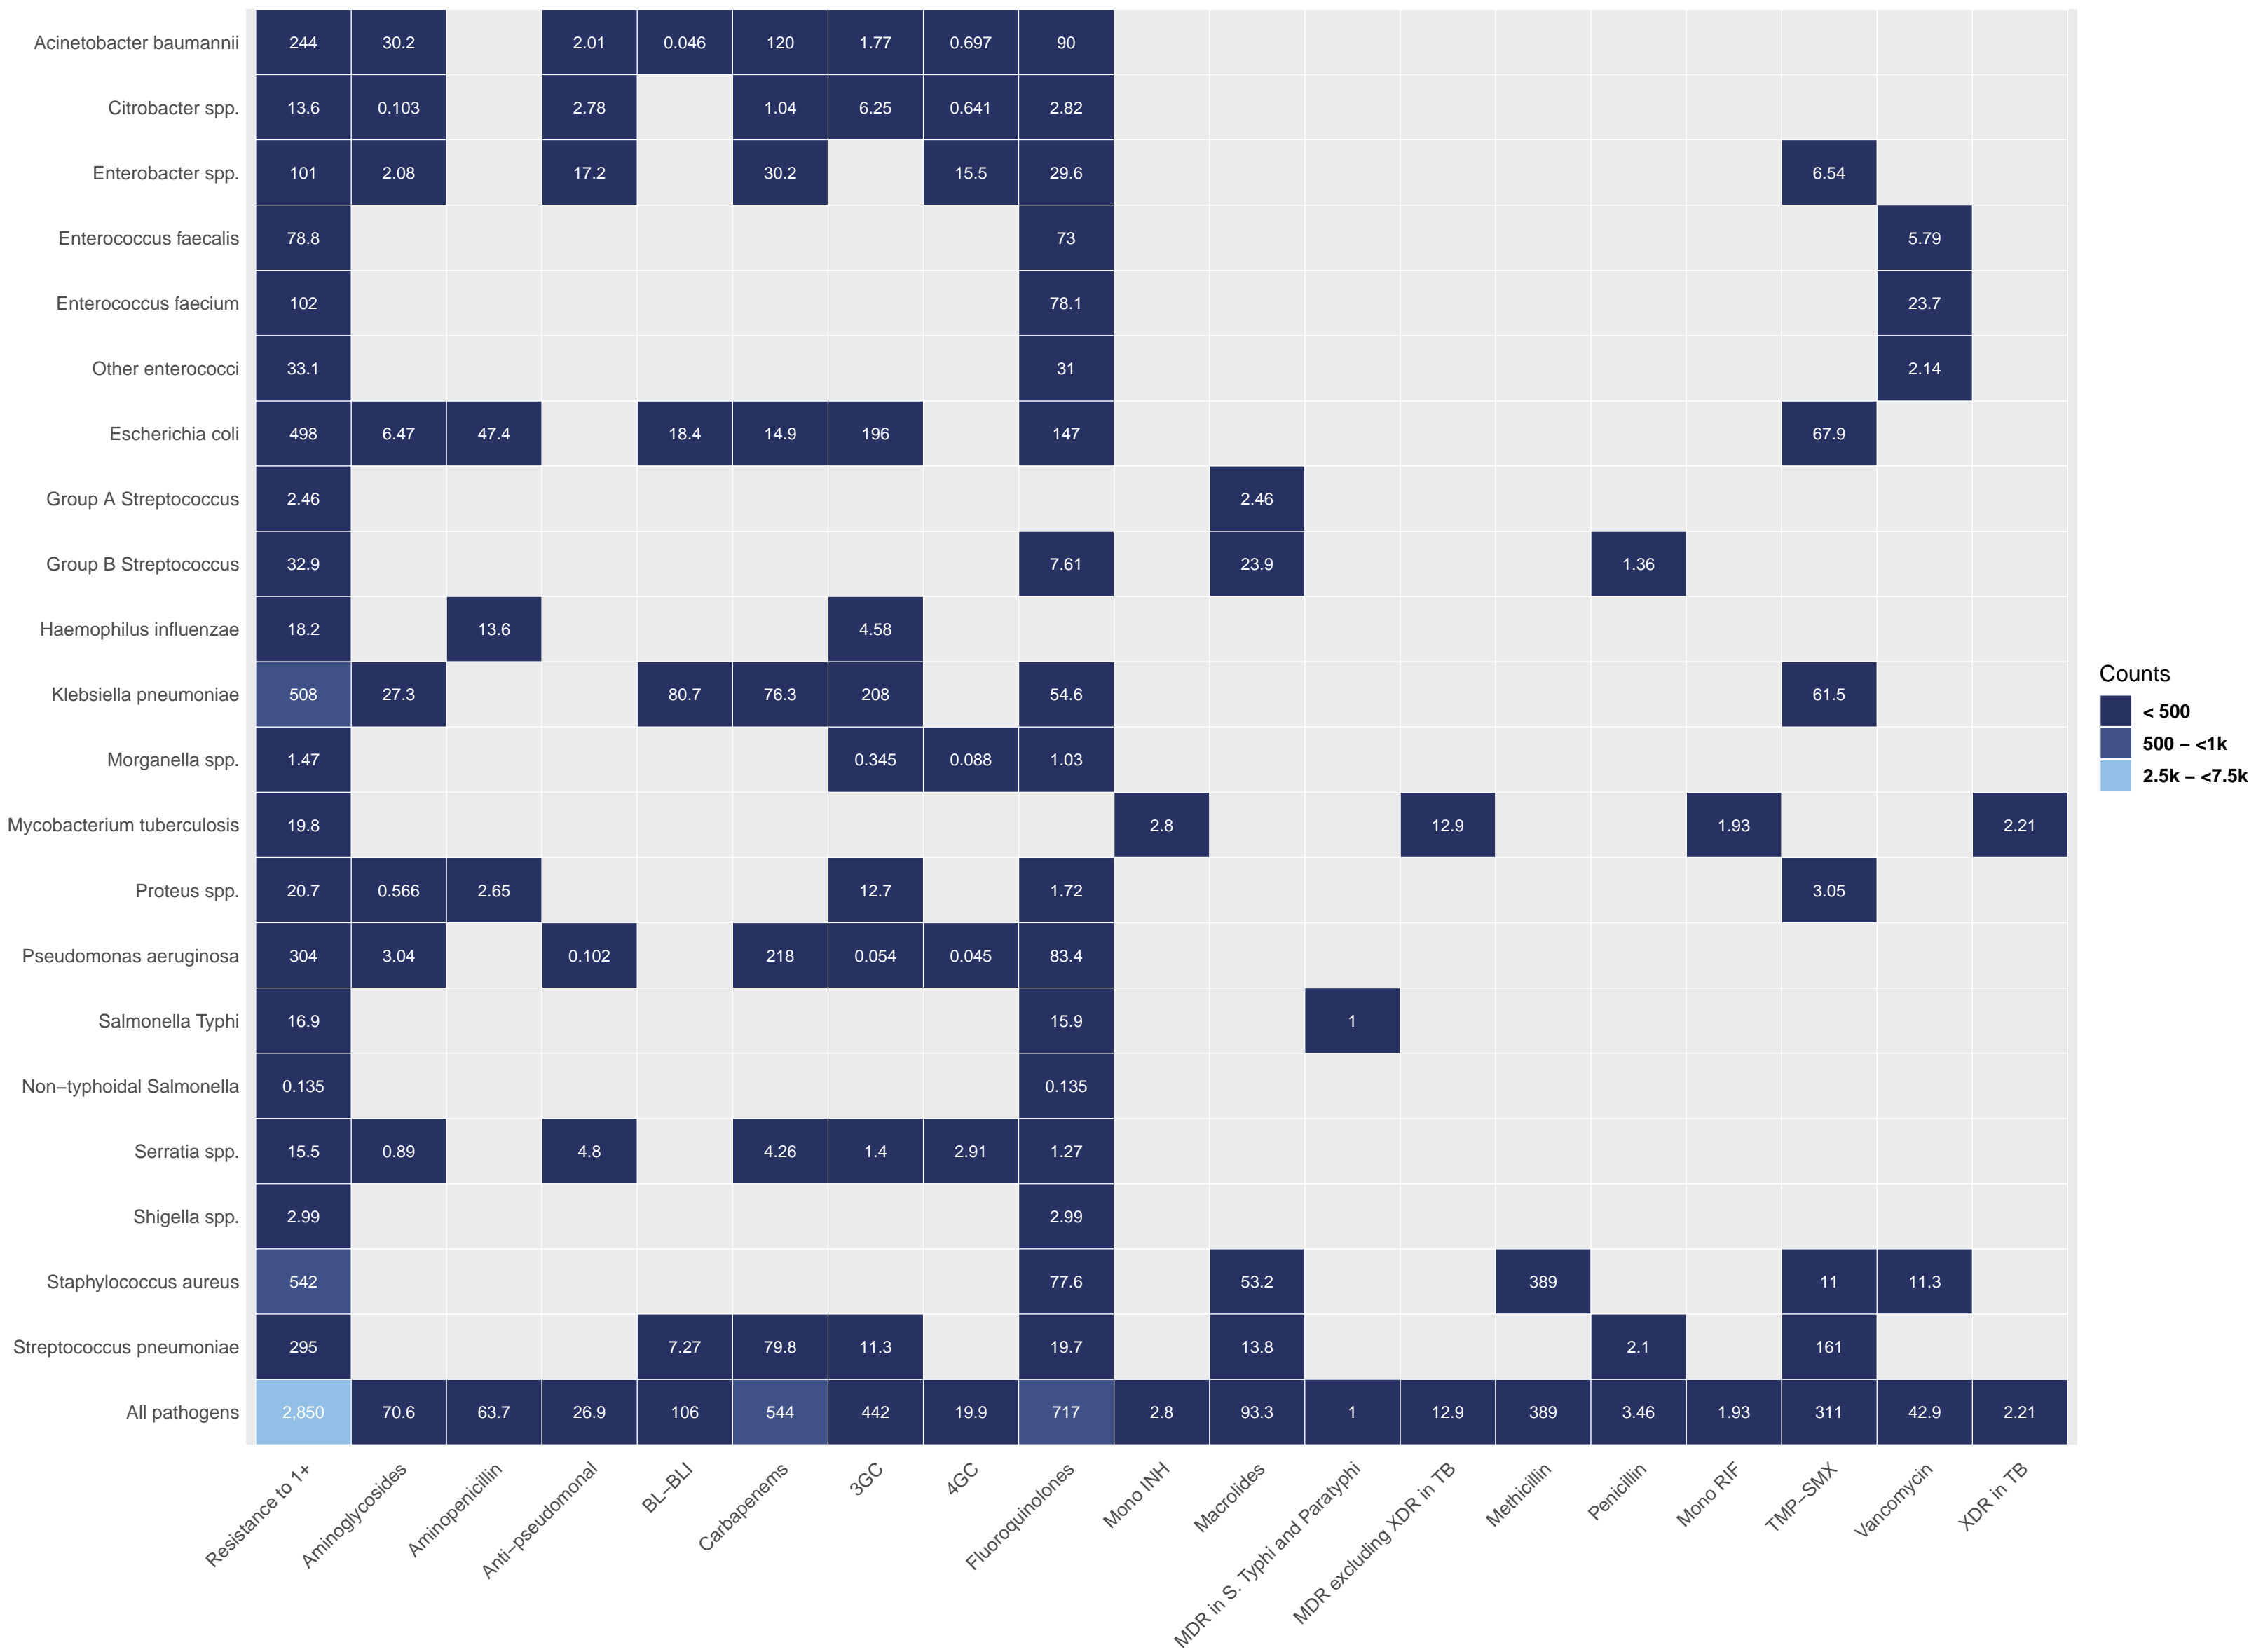

# Guyana

Deaths (count) associated with bacterial antimicrobial resistance by pathogen–drug combinations, 2019

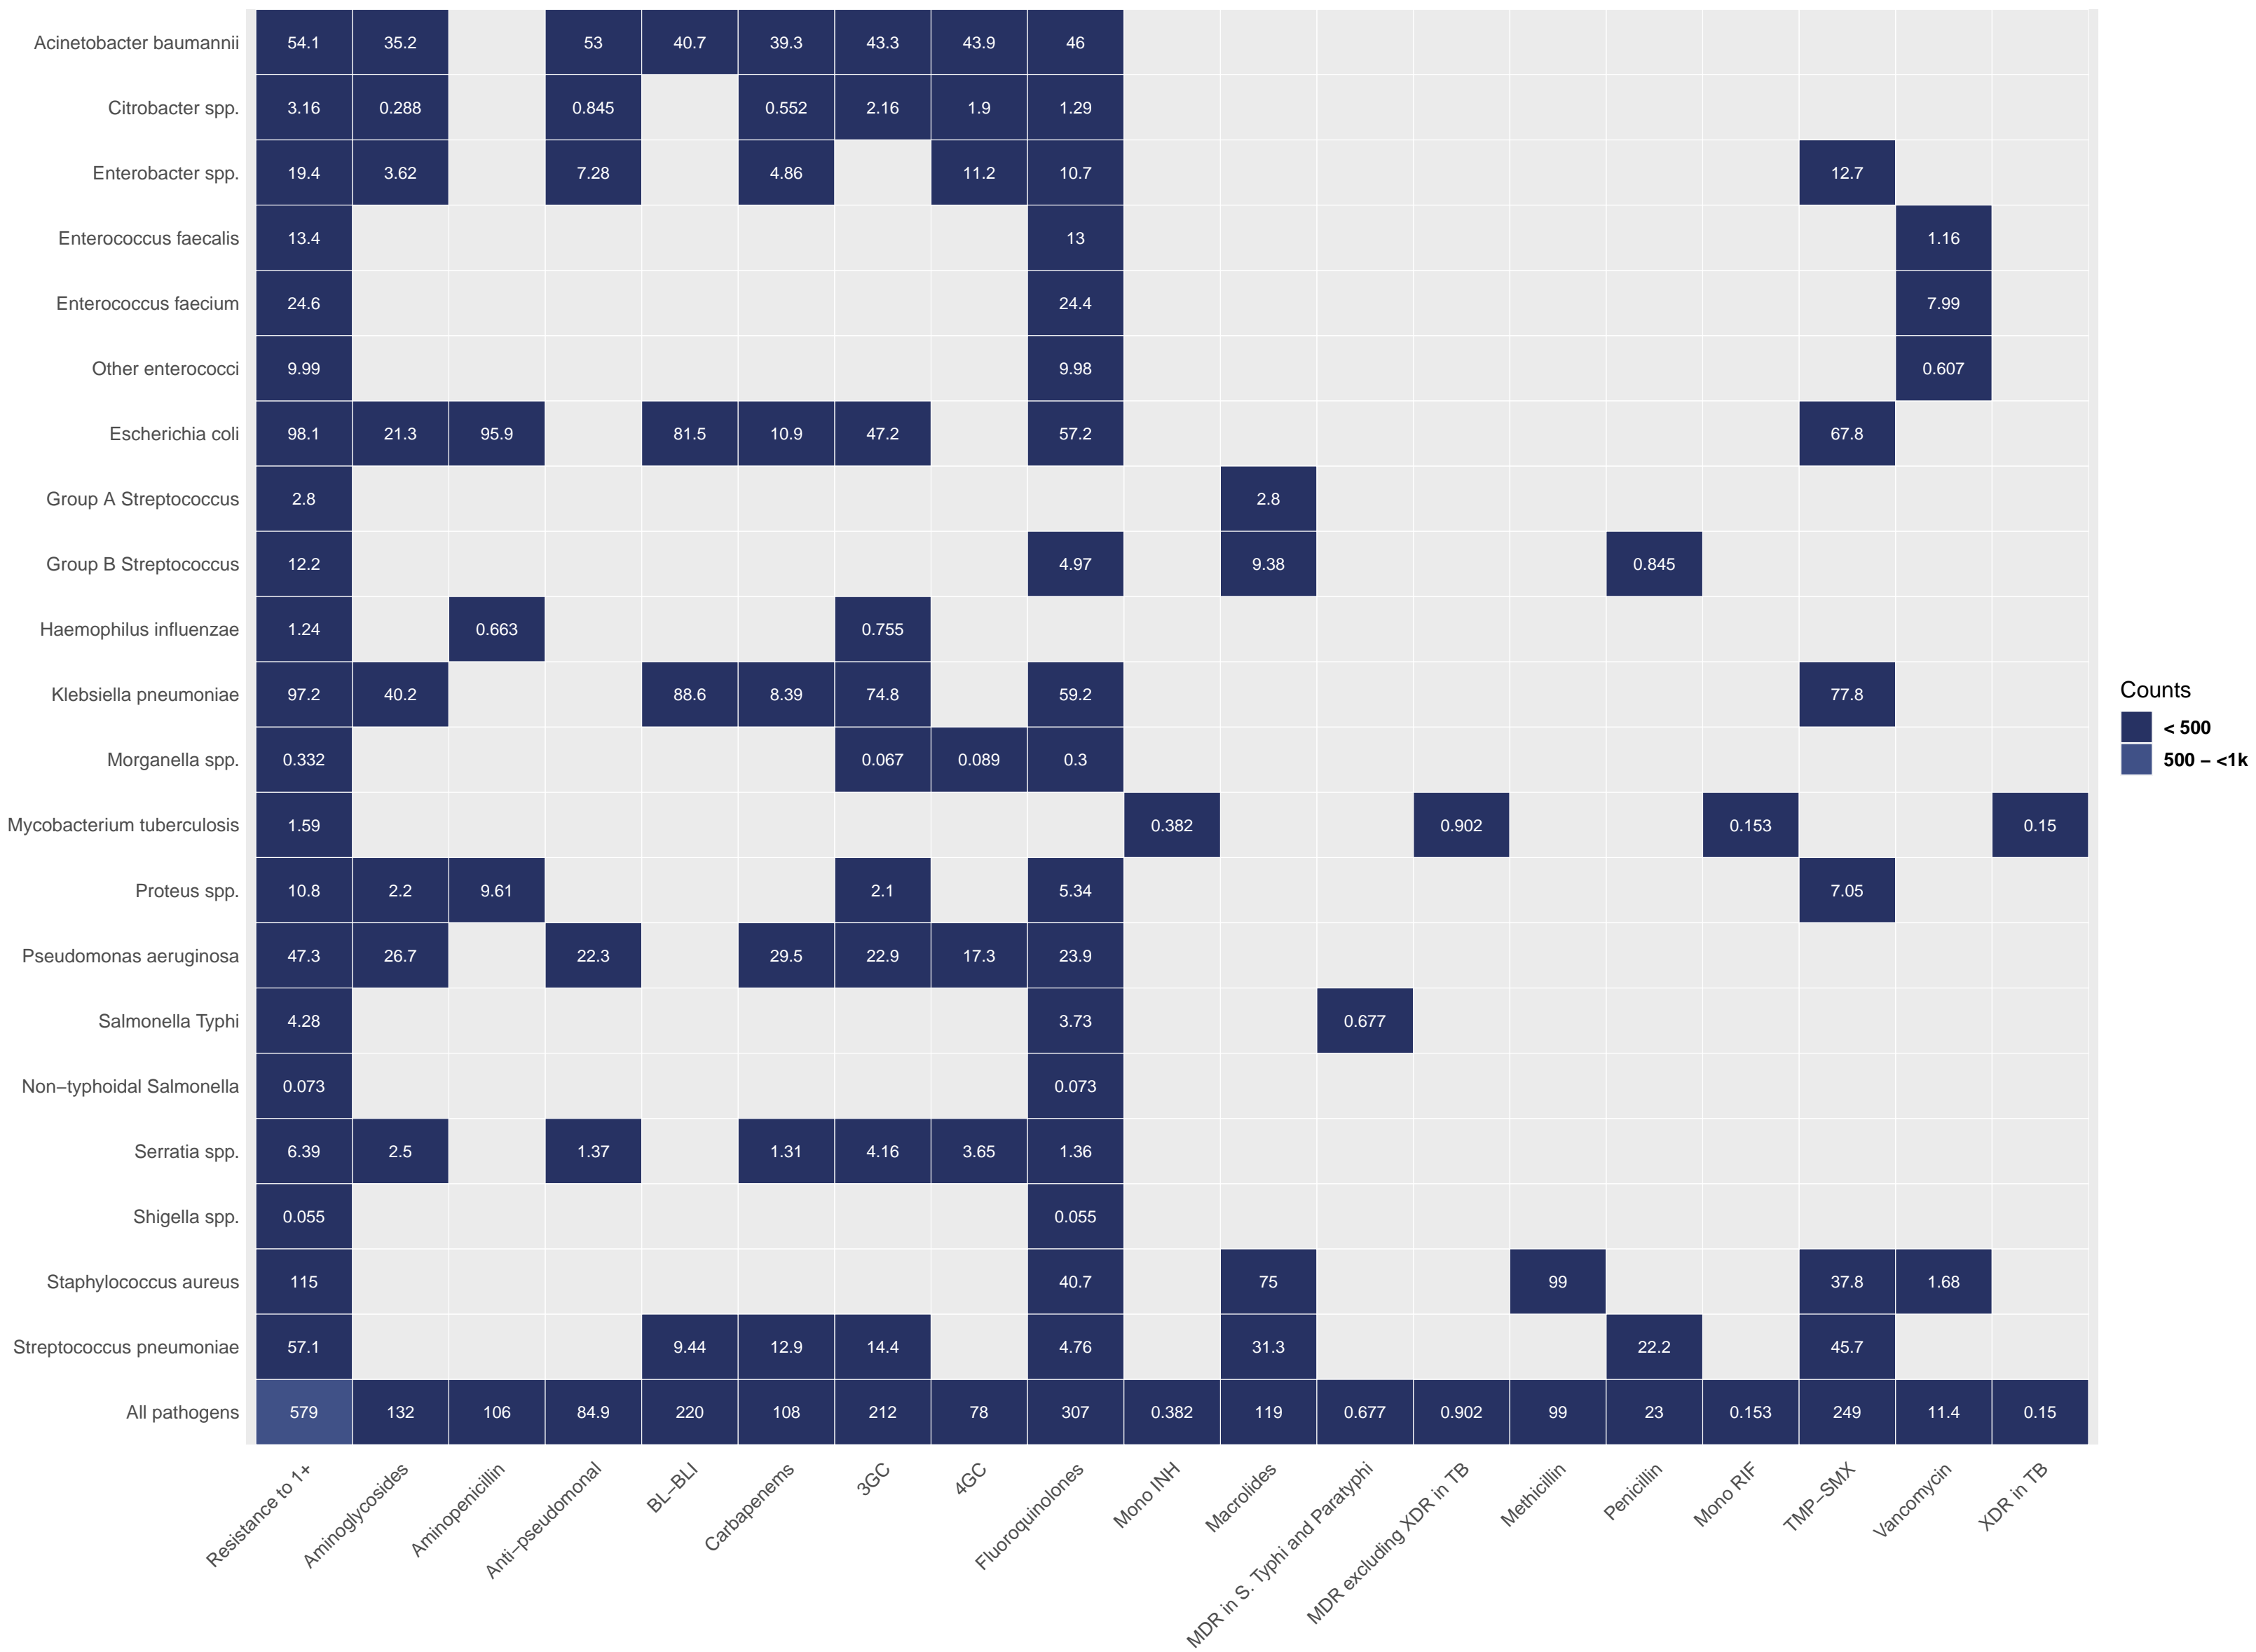



# Guyana

Deaths (count) *attributable to* bacterial antimicrobial resistance by pathogen–drug combinations, 2019

|                            |                  |                 |                 |                  |        |             |       |       |                  |          |            |                               |                         |             |            |          |         |            |           |
|----------------------------|------------------|-----------------|-----------------|------------------|--------|-------------|-------|-------|------------------|----------|------------|-------------------------------|-------------------------|-------------|------------|----------|---------|------------|-----------|
| Acinetobacter baumannii    | 16.8             | 1.51            |                 | 2.95             | 0.016  | 6.36        | 0.153 | 0.009 | 5.83             |          |            |                               |                         |             |            |          |         |            |           |
| Citrobacter spp.           | 0.898            | 0.014           |                 | 0.156            |        | 0.13        | 0.178 | 0.224 | 0.195            |          |            |                               |                         |             |            |          |         |            |           |
| Enterobacter spp.          | 4.56             | 0.205           |                 | 0.651            |        | 1.07        |       | 0.646 | 1.27             |          |            |                               |                         |             |            |          | 0.72    |            |           |
| Enterococcus faecalis      | 3.59             |                 |                 |                  |        |             |       |       | 3.24             |          |            |                               |                         |             |            |          |         | 0.345      |           |
| Enterococcus faecium       | 6.43             |                 |                 |                  |        |             |       |       | 4.58             |          |            |                               |                         |             |            |          |         | 1.85       |           |
| Other enterococci          | 2.05             |                 |                 |                  |        |             |       |       | 1.94             |          |            |                               |                         |             |            |          |         | 0.109      |           |
| Escherichia coli           | 24.5             | 1.27            | 1.13            |                  | 3.98   | 2.33        | 5.99  |       | 5.87             |          |            |                               |                         |             |            |          |         | 3.92       |           |
| Group A Streptococcus      | 0.27             |                 |                 |                  |        |             |       |       |                  |          | 0.27       |                               |                         |             |            |          |         |            |           |
| Group B Streptococcus      | 1.92             |                 |                 |                  |        |             |       |       | 0.868            |          | 0.898      |                               |                         | 0.15        |            |          |         |            |           |
| Haemophilus influenzae     | 0.315            |                 | 0.092           |                  |        |             | 0.223 |       |                  |          |            |                               |                         |             |            |          |         |            |           |
| Klebsiella pneumoniae      | 25.5             | 3.01            |                 |                  | 2.1    | 2.14        | 10.4  |       | 3.97             |          |            |                               |                         |             |            |          |         | 3.82       |           |
| Morganella spp.            | 0.075            |                 |                 |                  |        |             | 0.006 | 0.014 | 0.055            |          |            |                               |                         |             |            |          |         |            |           |
| Mycobacterium tuberculosis | 0.732            |                 |                 |                  |        |             |       |       |                  | 0.061    |            |                               | 0.537                   |             |            | 0.043    |         |            | 0.092     |
| Proteus spp.               | 1.39             | 0.098           | 0.206           |                  |        |             | 0.453 |       | 0.374            |          |            |                               |                         |             |            |          |         | 0.255      |           |
| Pseudomonas aeruginosa     | 11               | 0.732           |                 | 1.46             |        | 5.18        | 0.872 | 0.265 | 2.48             |          |            |                               |                         |             |            |          |         |            |           |
| Salmonella Typhi           | 0.839            |                 |                 |                  |        |             |       |       | 0.755            |          |            | 0.084                         |                         |             |            |          |         |            |           |
| Non-typhoidal Salmonella   | 0.015            |                 |                 |                  |        |             |       |       | 0.015            |          |            |                               |                         |             |            |          |         |            |           |
| Serratia spp.              | 1.61             | 0.145           |                 | 0.265            |        | 0.342       | 0.31  | 0.405 | 0.138            |          |            |                               |                         |             |            |          |         |            |           |
| Shigella spp.              | 0.011            |                 |                 |                  |        |             |       |       | 0.011            |          |            |                               |                         |             |            |          |         |            |           |
| Staphylococcus aureus      | 33.6             |                 |                 |                  |        |             |       |       | 1.7              |          | 2.57       |                               | 25.8                    |             |            |          |         | 3.15       | 0.365     |
| Streptococcus pneumoniae   | 11.2             |                 |                 |                  | 0.155  | 2.74        | 1.12  |       | 0.564            |          | 1.24       |                               |                         | 1.27        |            |          |         | 4.11       |           |
| All pathogens              | 147              | 6.99            | 1.43            | 5.49             | 6.25   | 20.3        | 19.7  | 1.56  | 33.8             | 0.061    | 4.98       | 0.084                         | 0.537                   | 25.8        | 1.42       | 0.043    | 16      | 2.67       | 0.092     |
|                            | Resistance to 1+ | Aminoglycosides | Aminopenicillin | Anti-pseudomonal | BL-BLI | Carbapenems | 3GC   | 4GC   | Fluoroquinolones | Mono INH | Macrolides | MDR in S. Typhi and Paratyphi | MDR excluding XDR in TB | Methicillin | Penicillin | Mono RIF | TMP-SMX | Vancomycin | XDR in TB |

Counts  
 < 500

# Haiti

Deaths (count) associated with bacterial antimicrobial resistance by pathogen–drug combinations, 2019

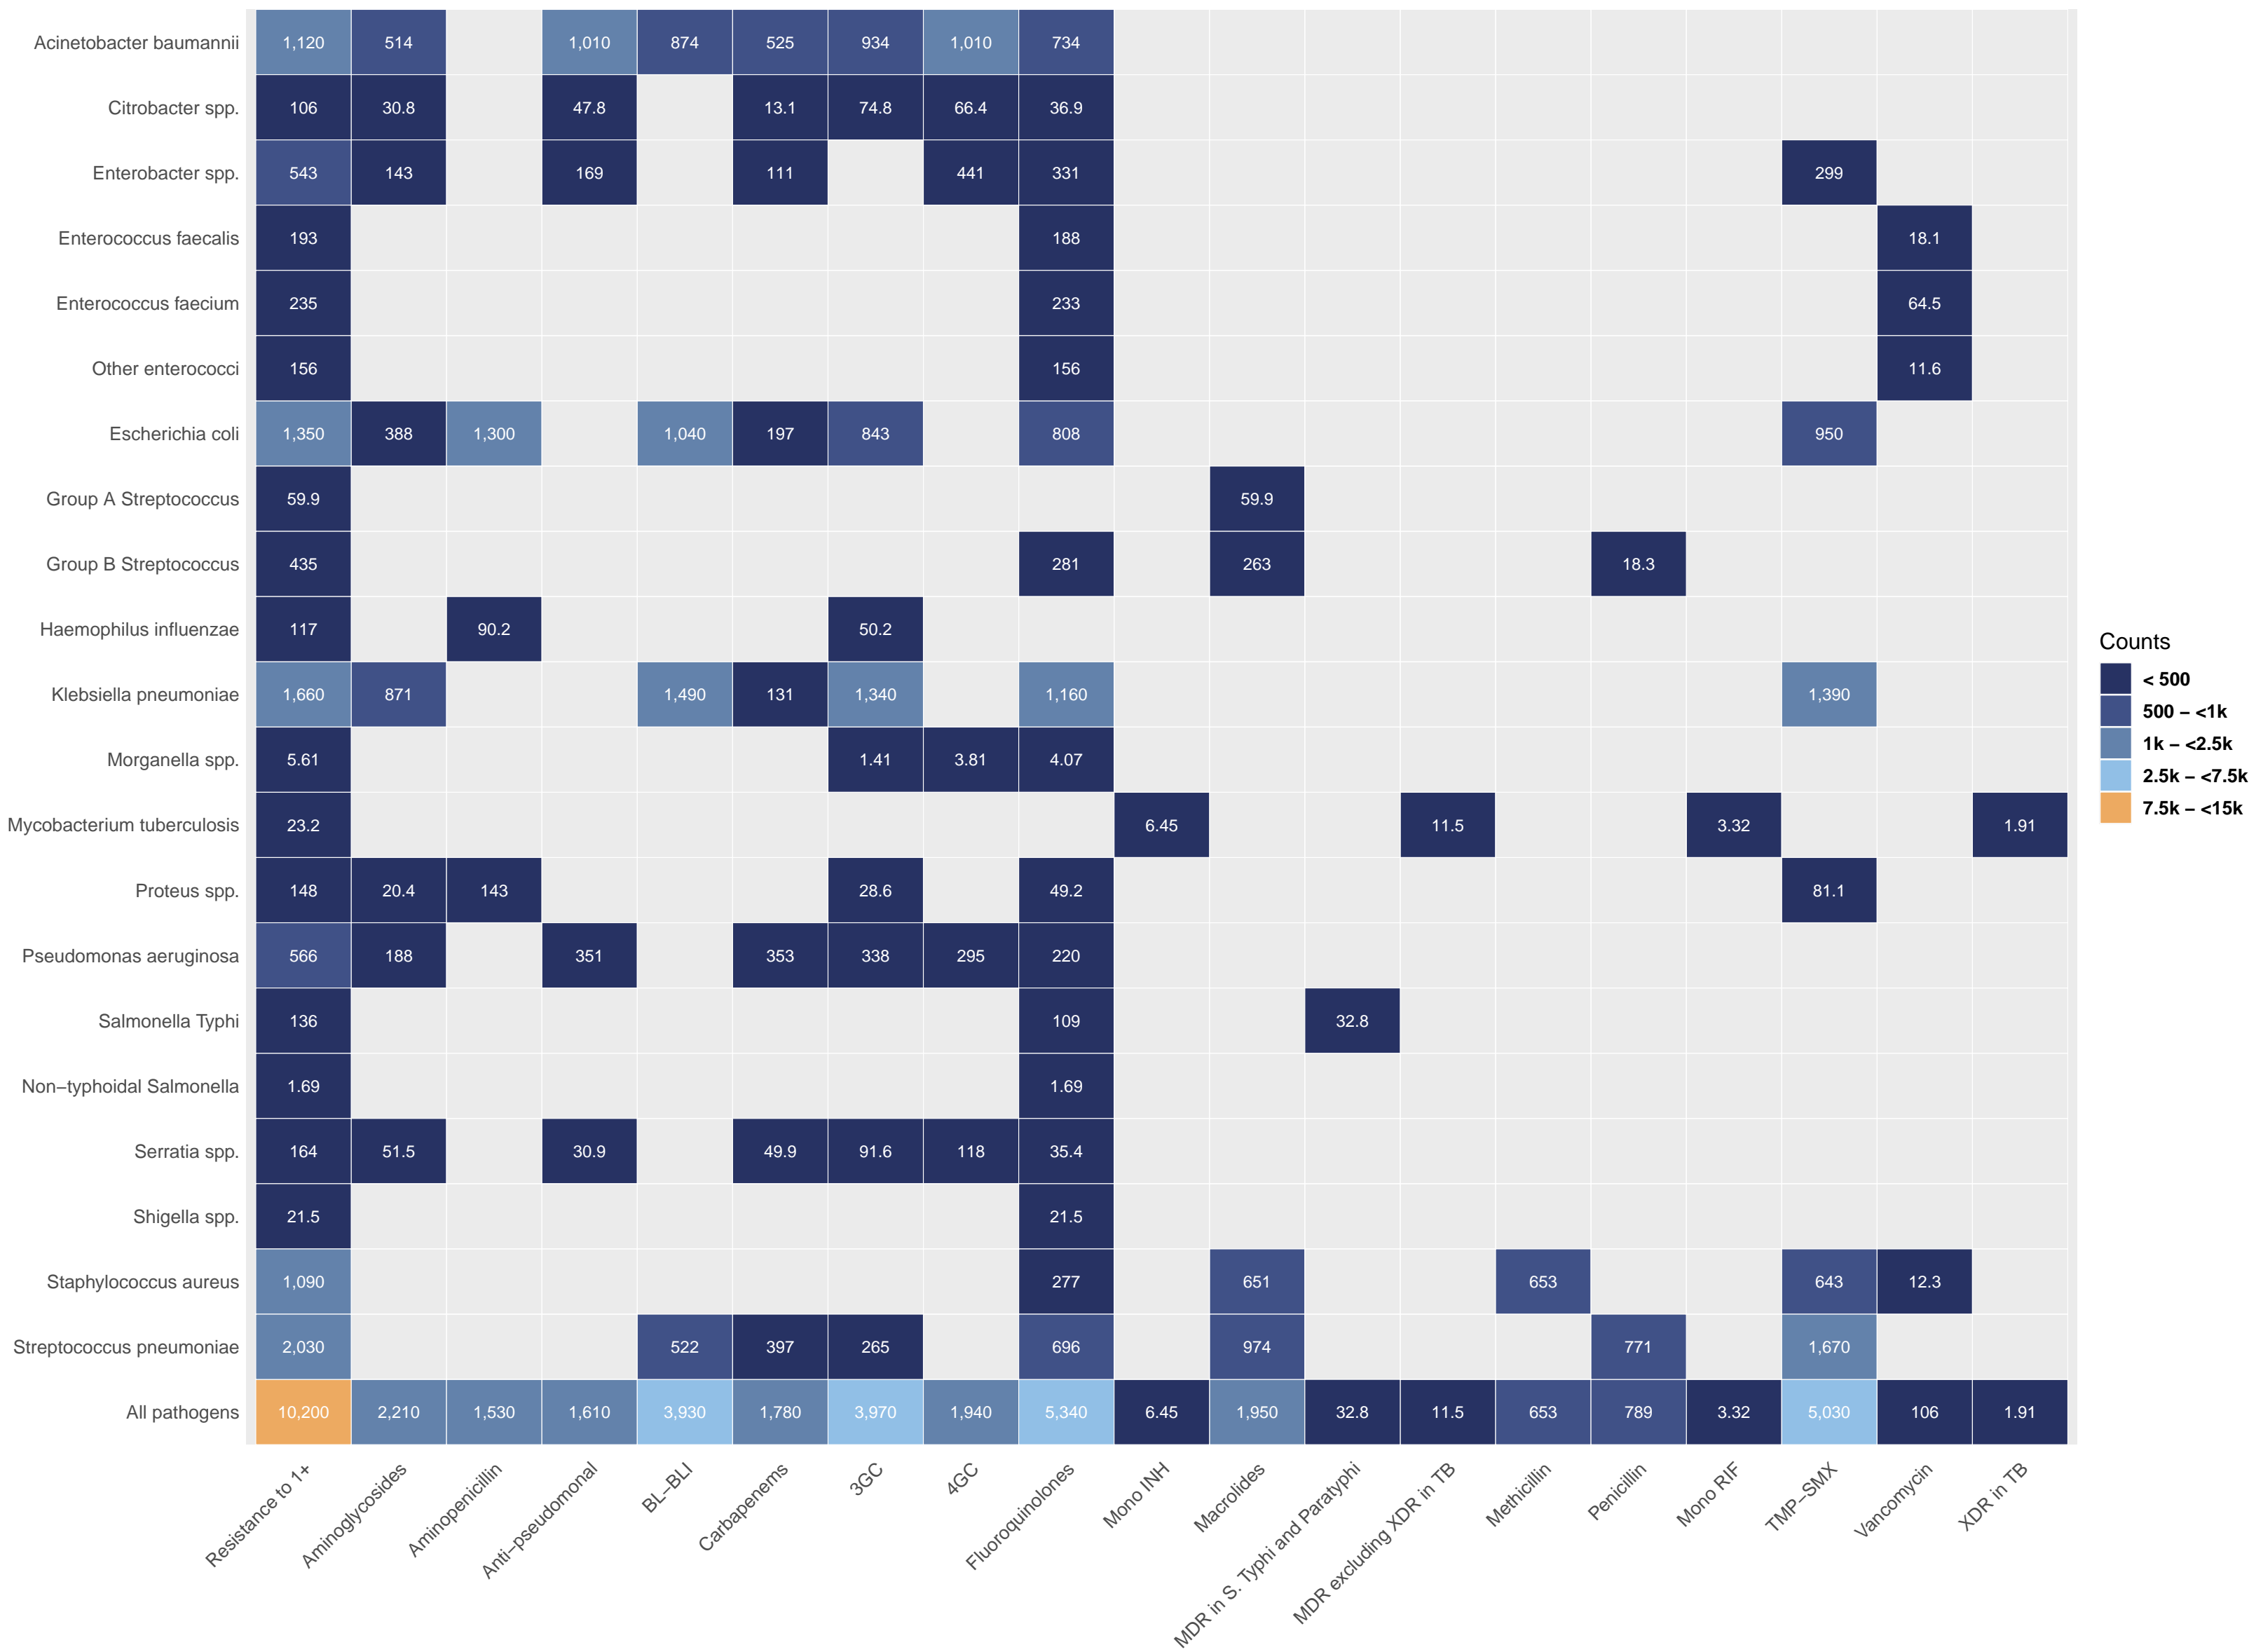

# Haiti

Deaths (count) *attributable to* bacterial antimicrobial resistance by pathogen–drug combinations, 2019

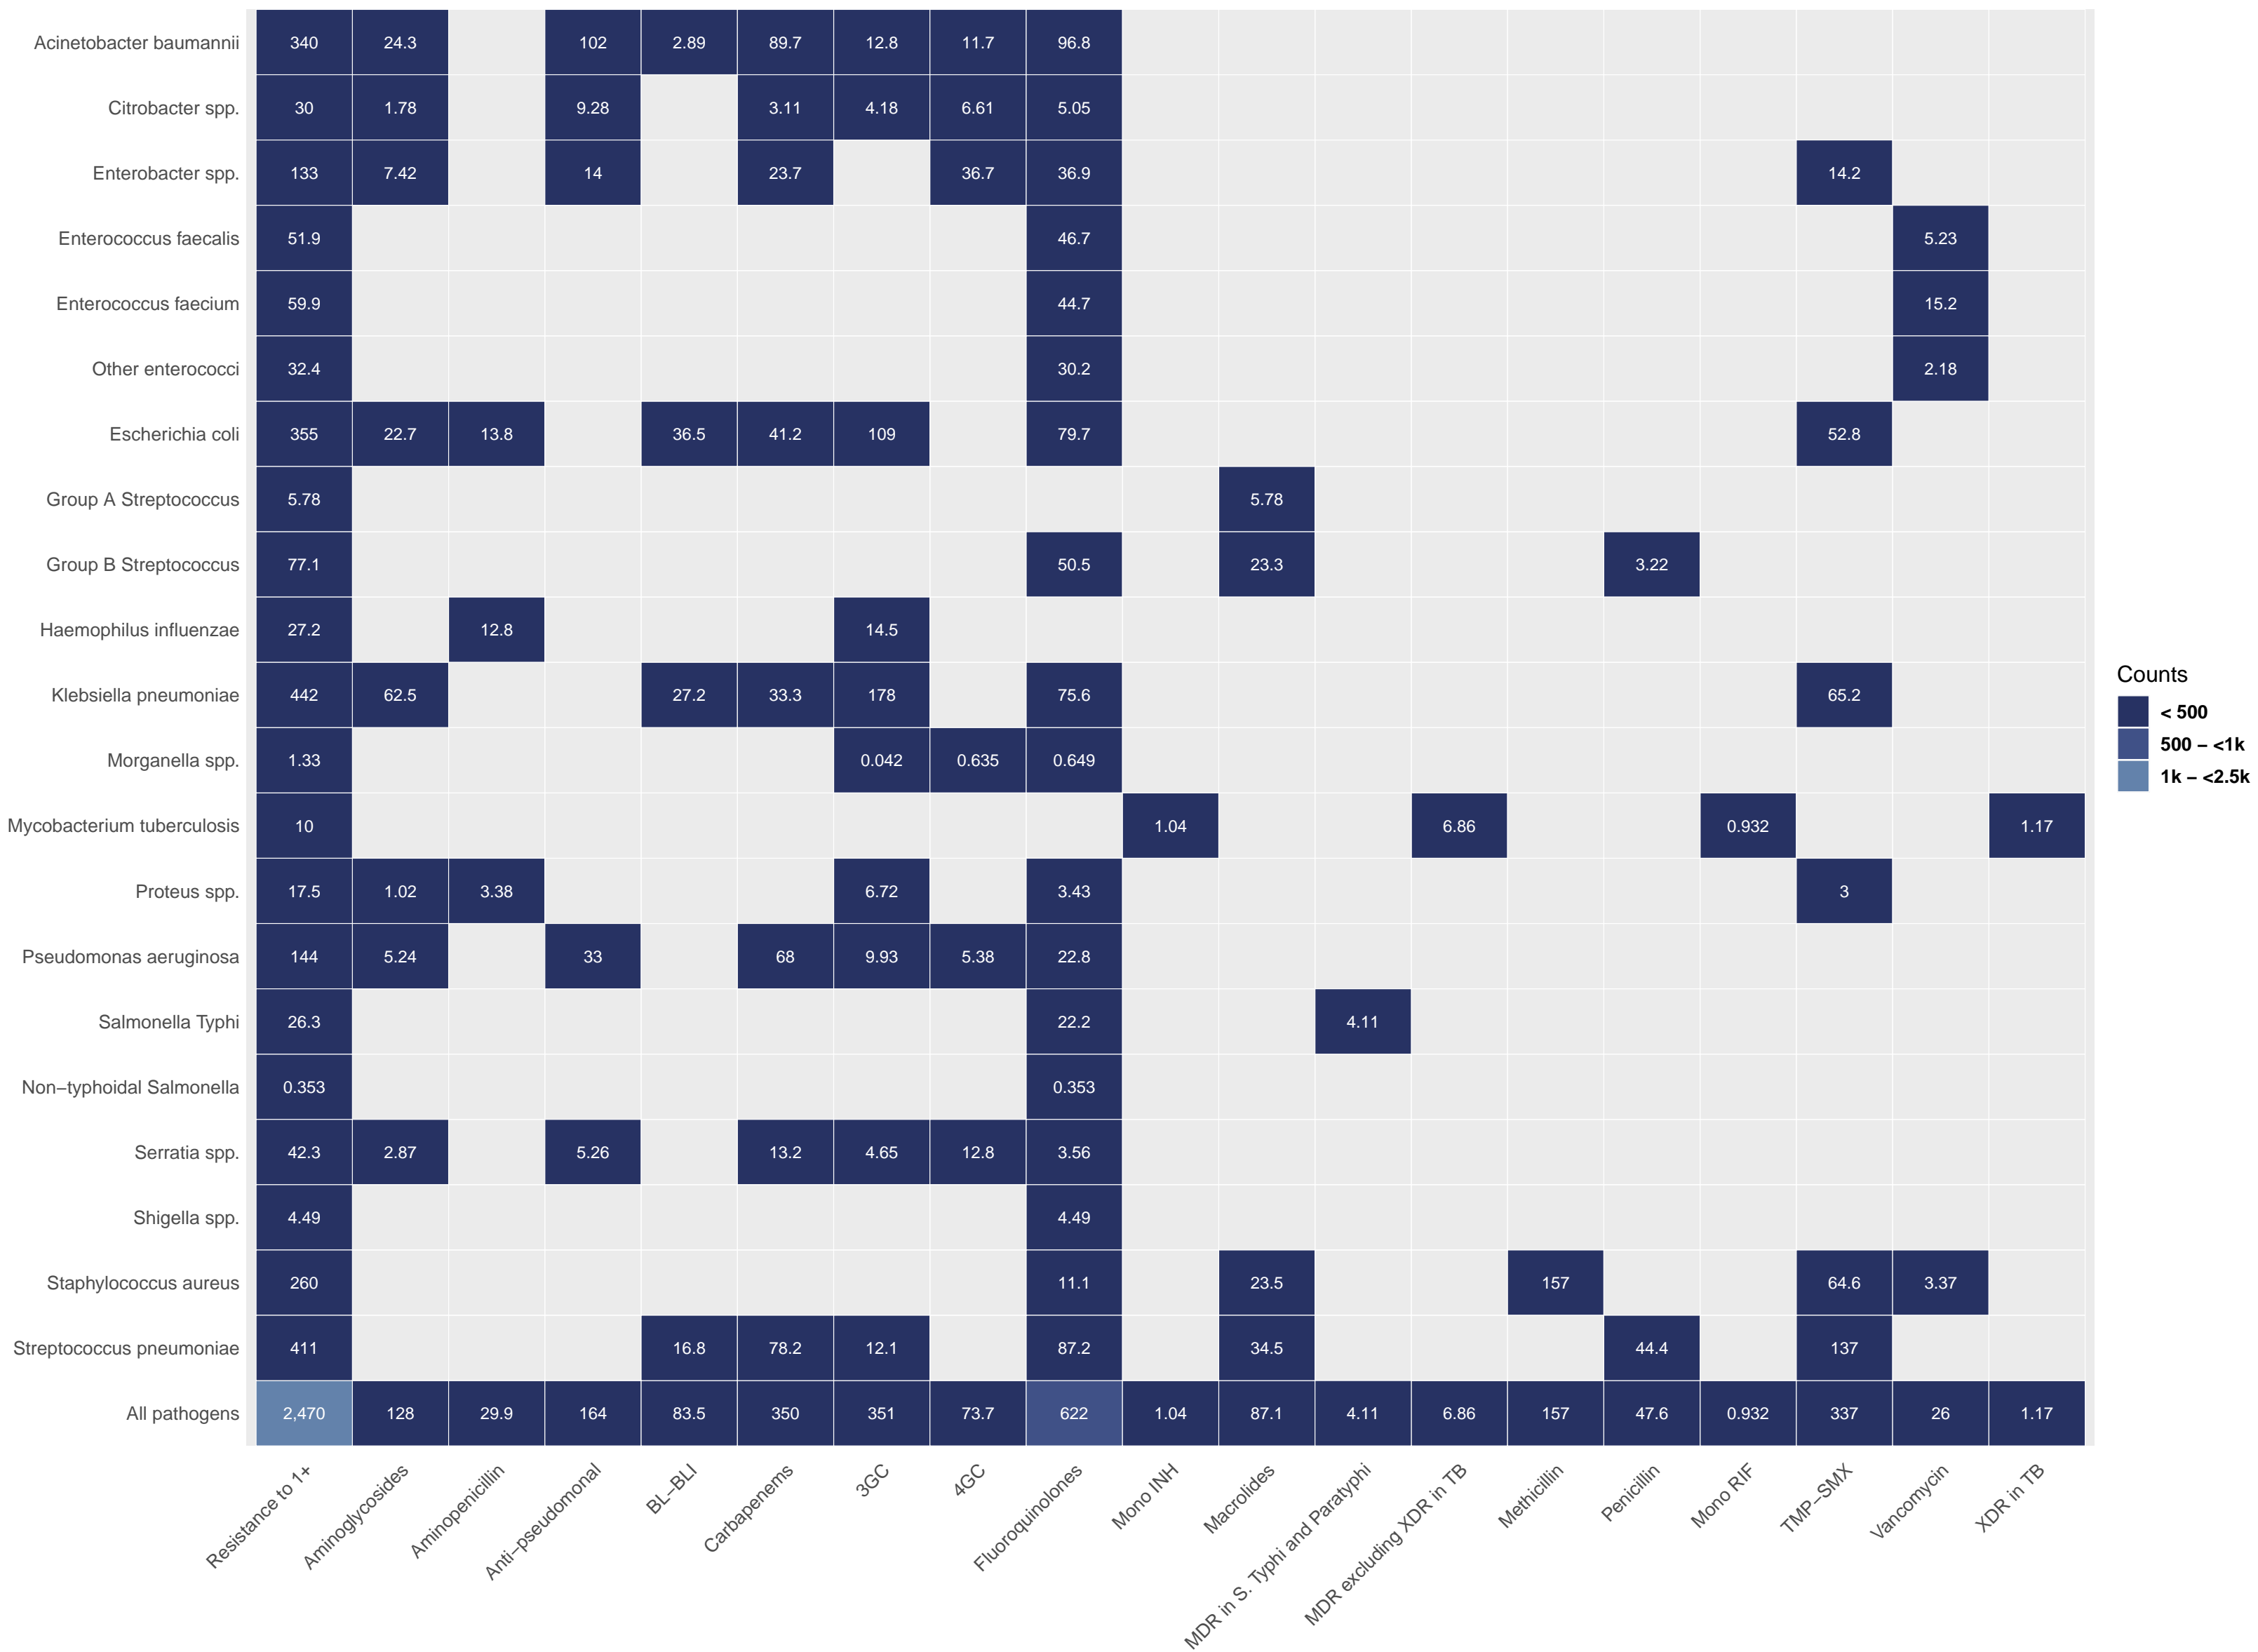

Counts

- < 500
- 500 – <1k
- 1k – <2.5k

# Honduras

Deaths (count) associated with bacterial antimicrobial resistance by pathogen–drug combinations, 2019

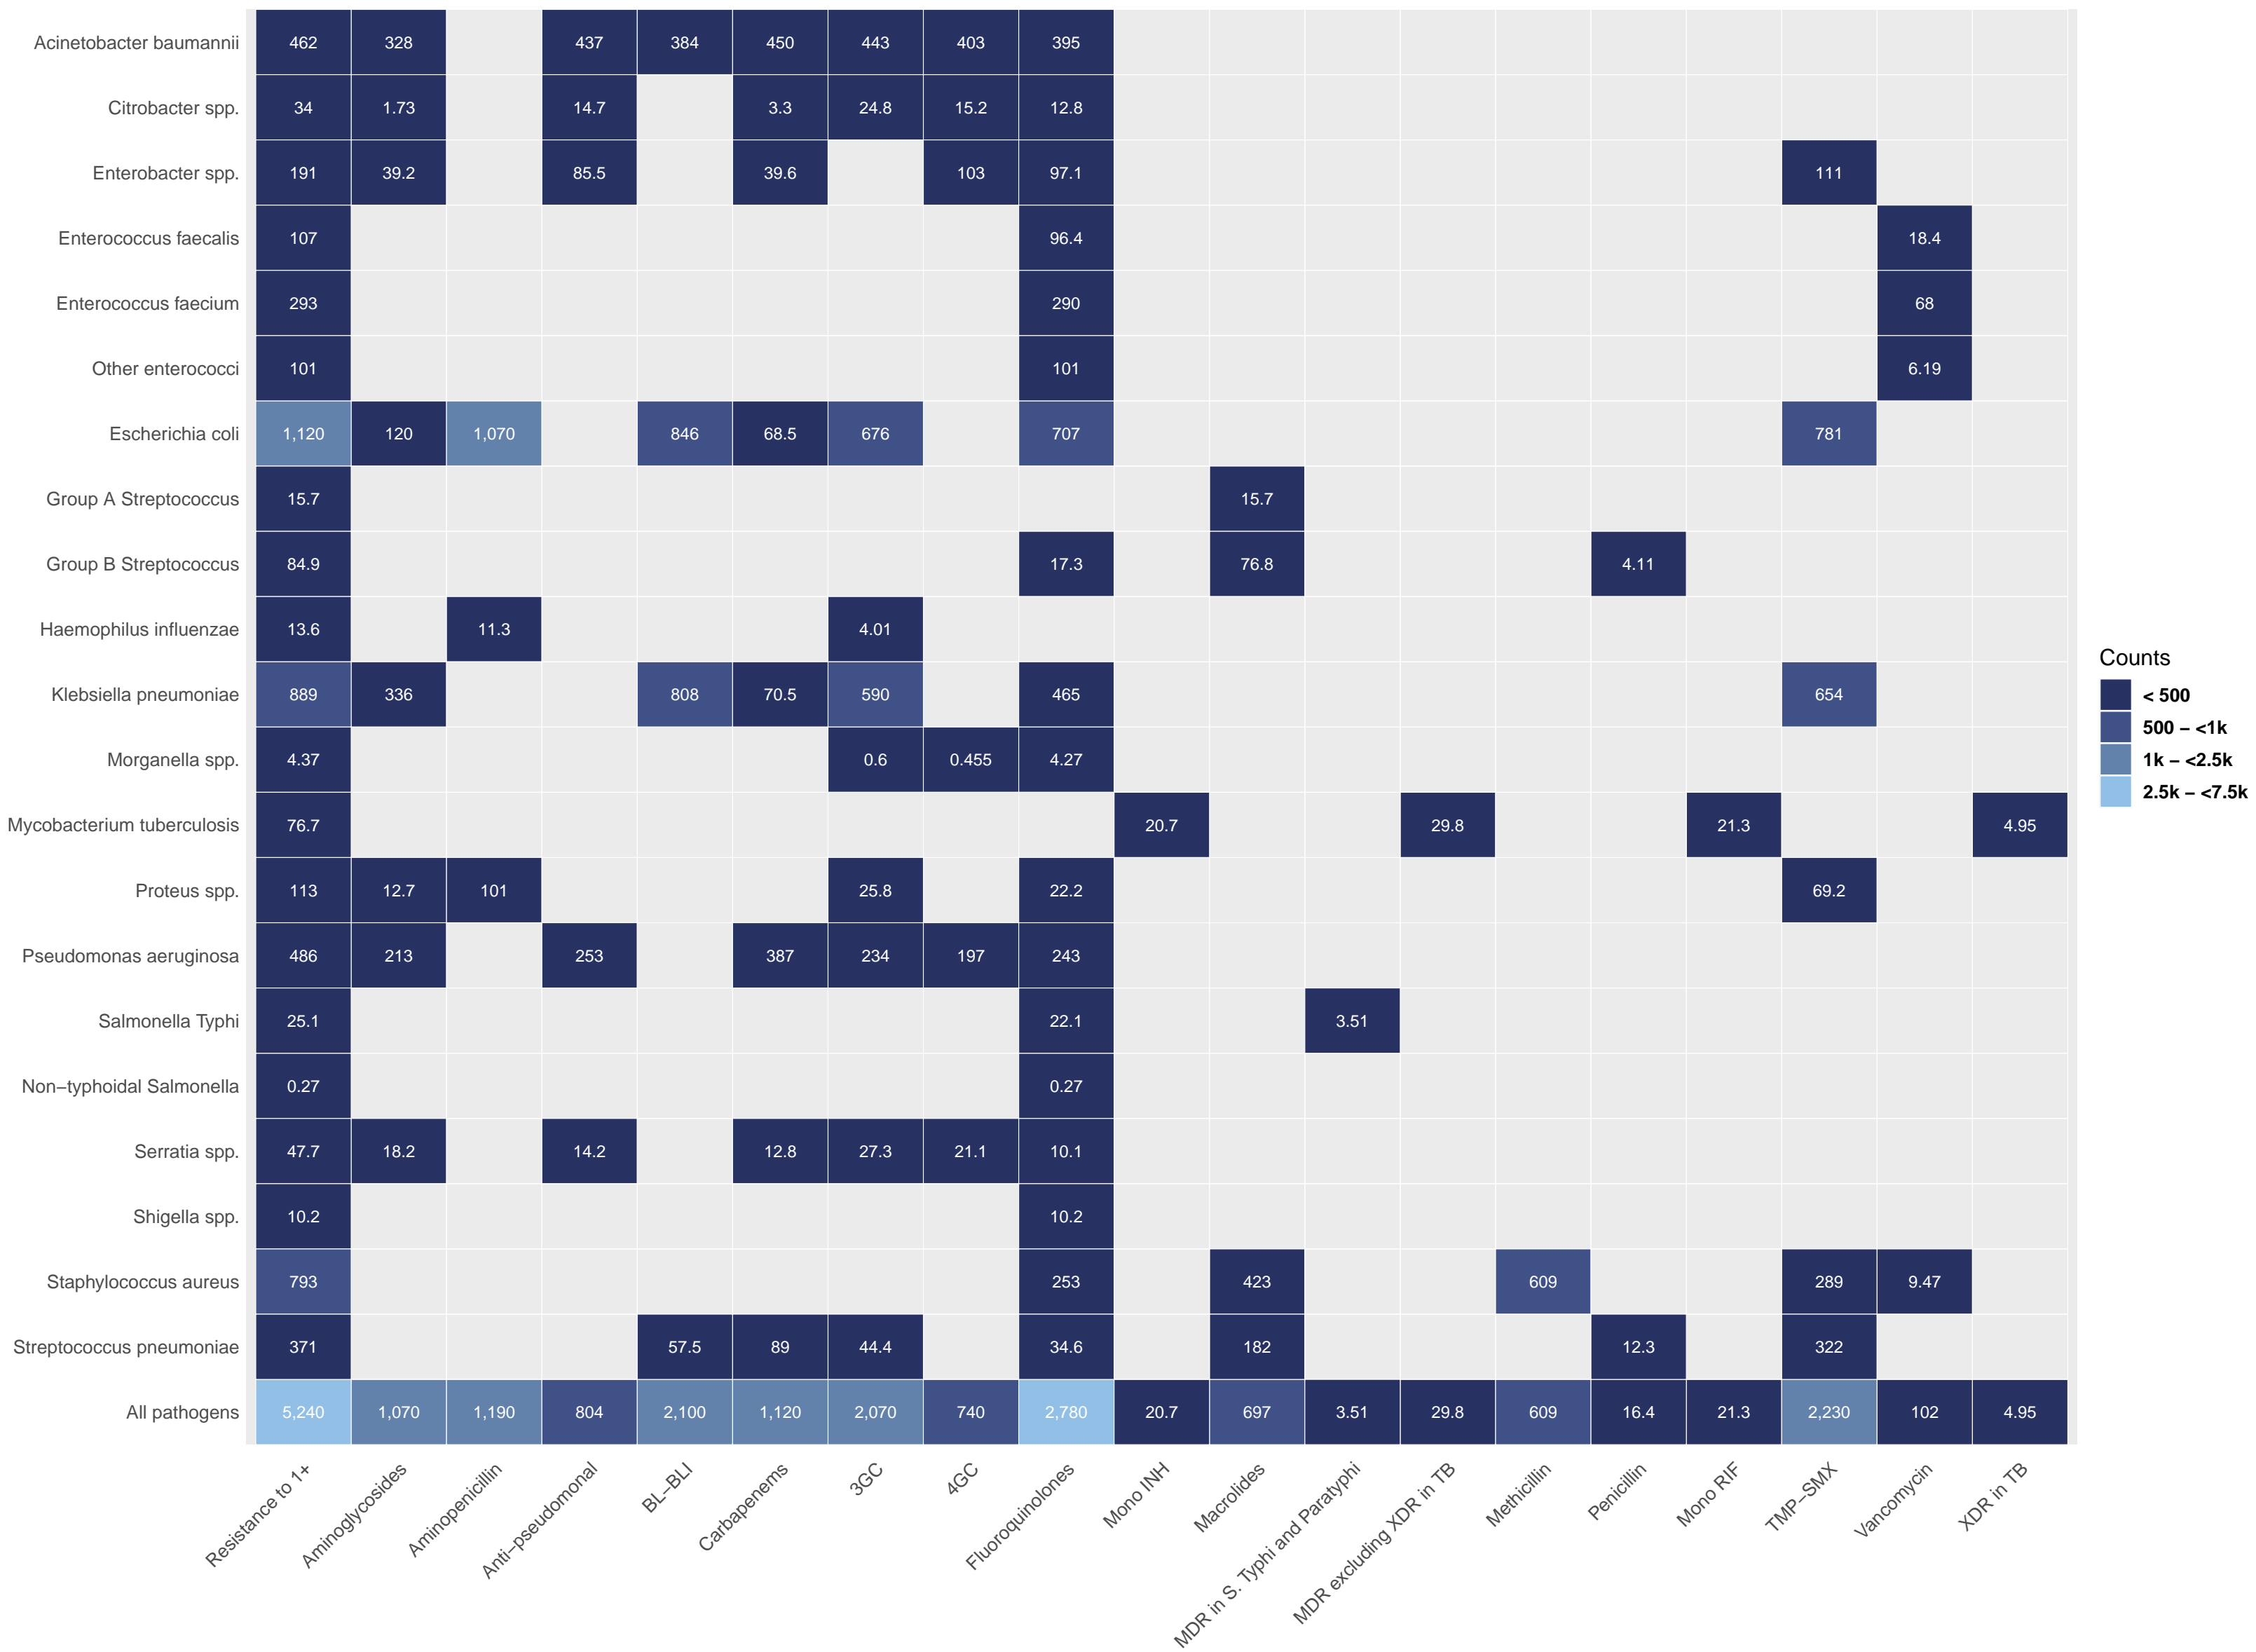

# Honduras

Deaths (count) *attributable to* bacterial antimicrobial resistance by pathogen–drug combinations, 2019

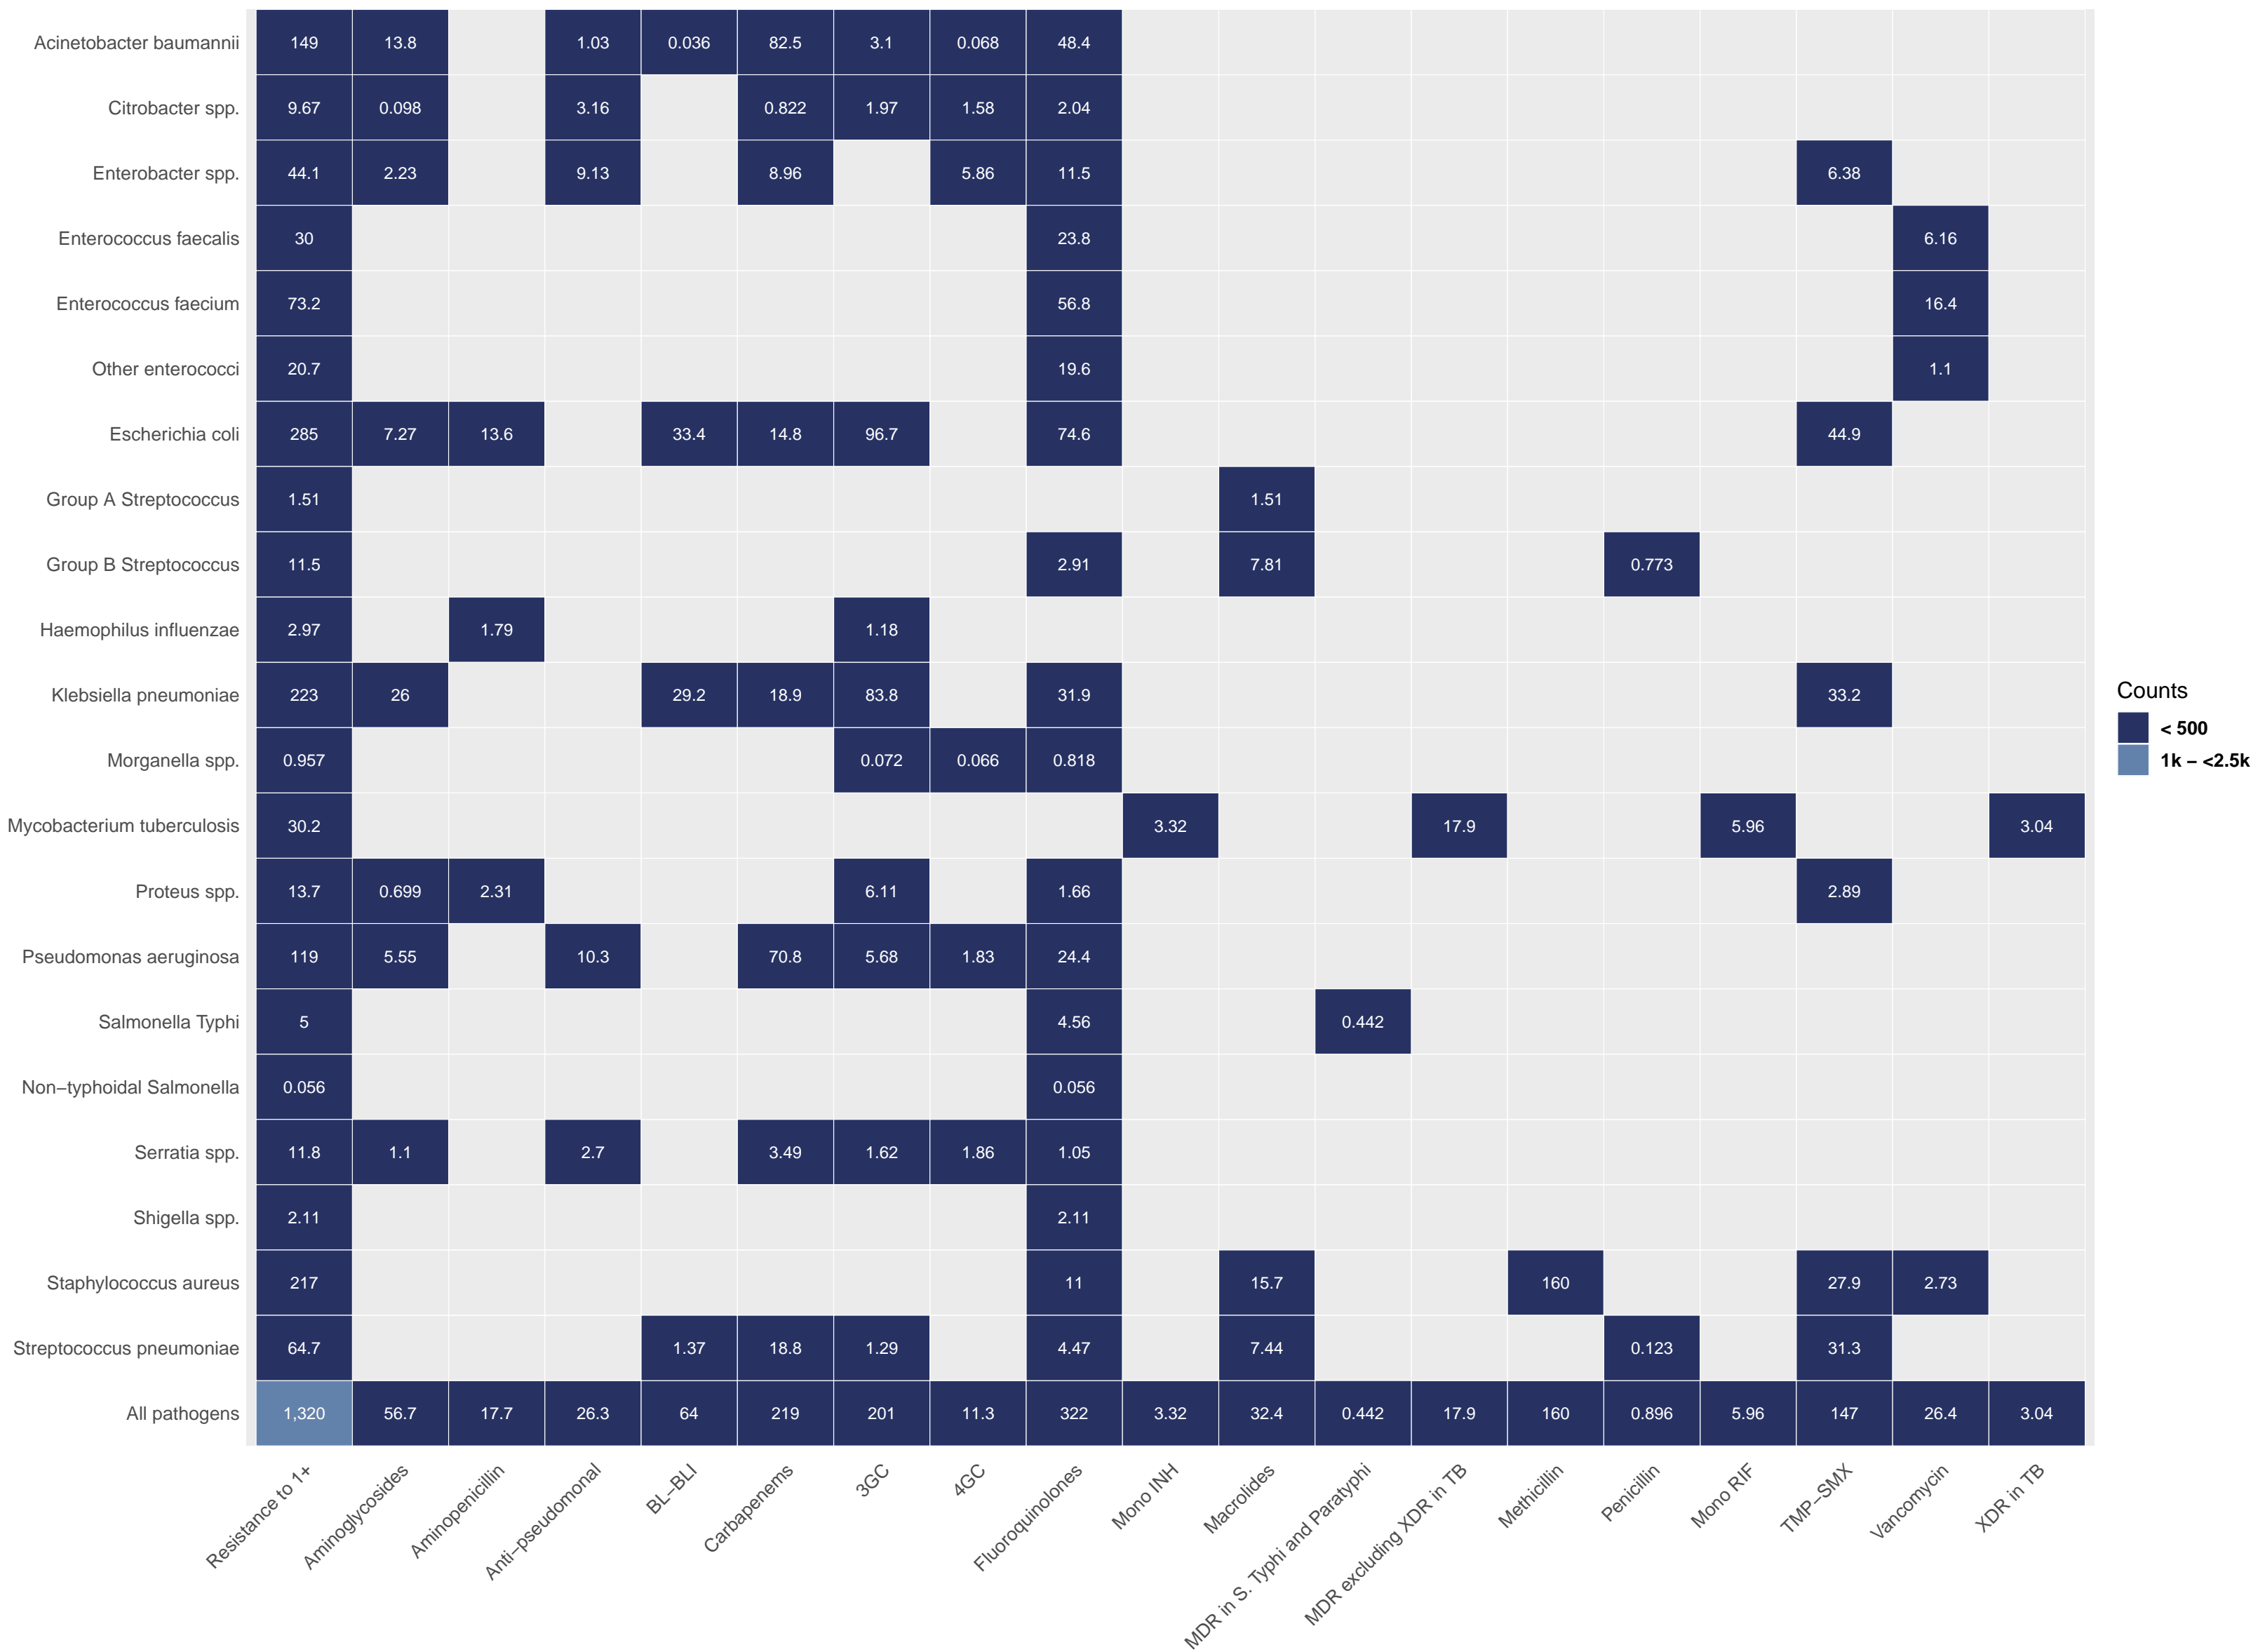

Counts

- < 500
- 1k – <2.5k

# Jamaica

Deaths (count) associated with bacterial antimicrobial resistance by pathogen–drug combinations, 2019

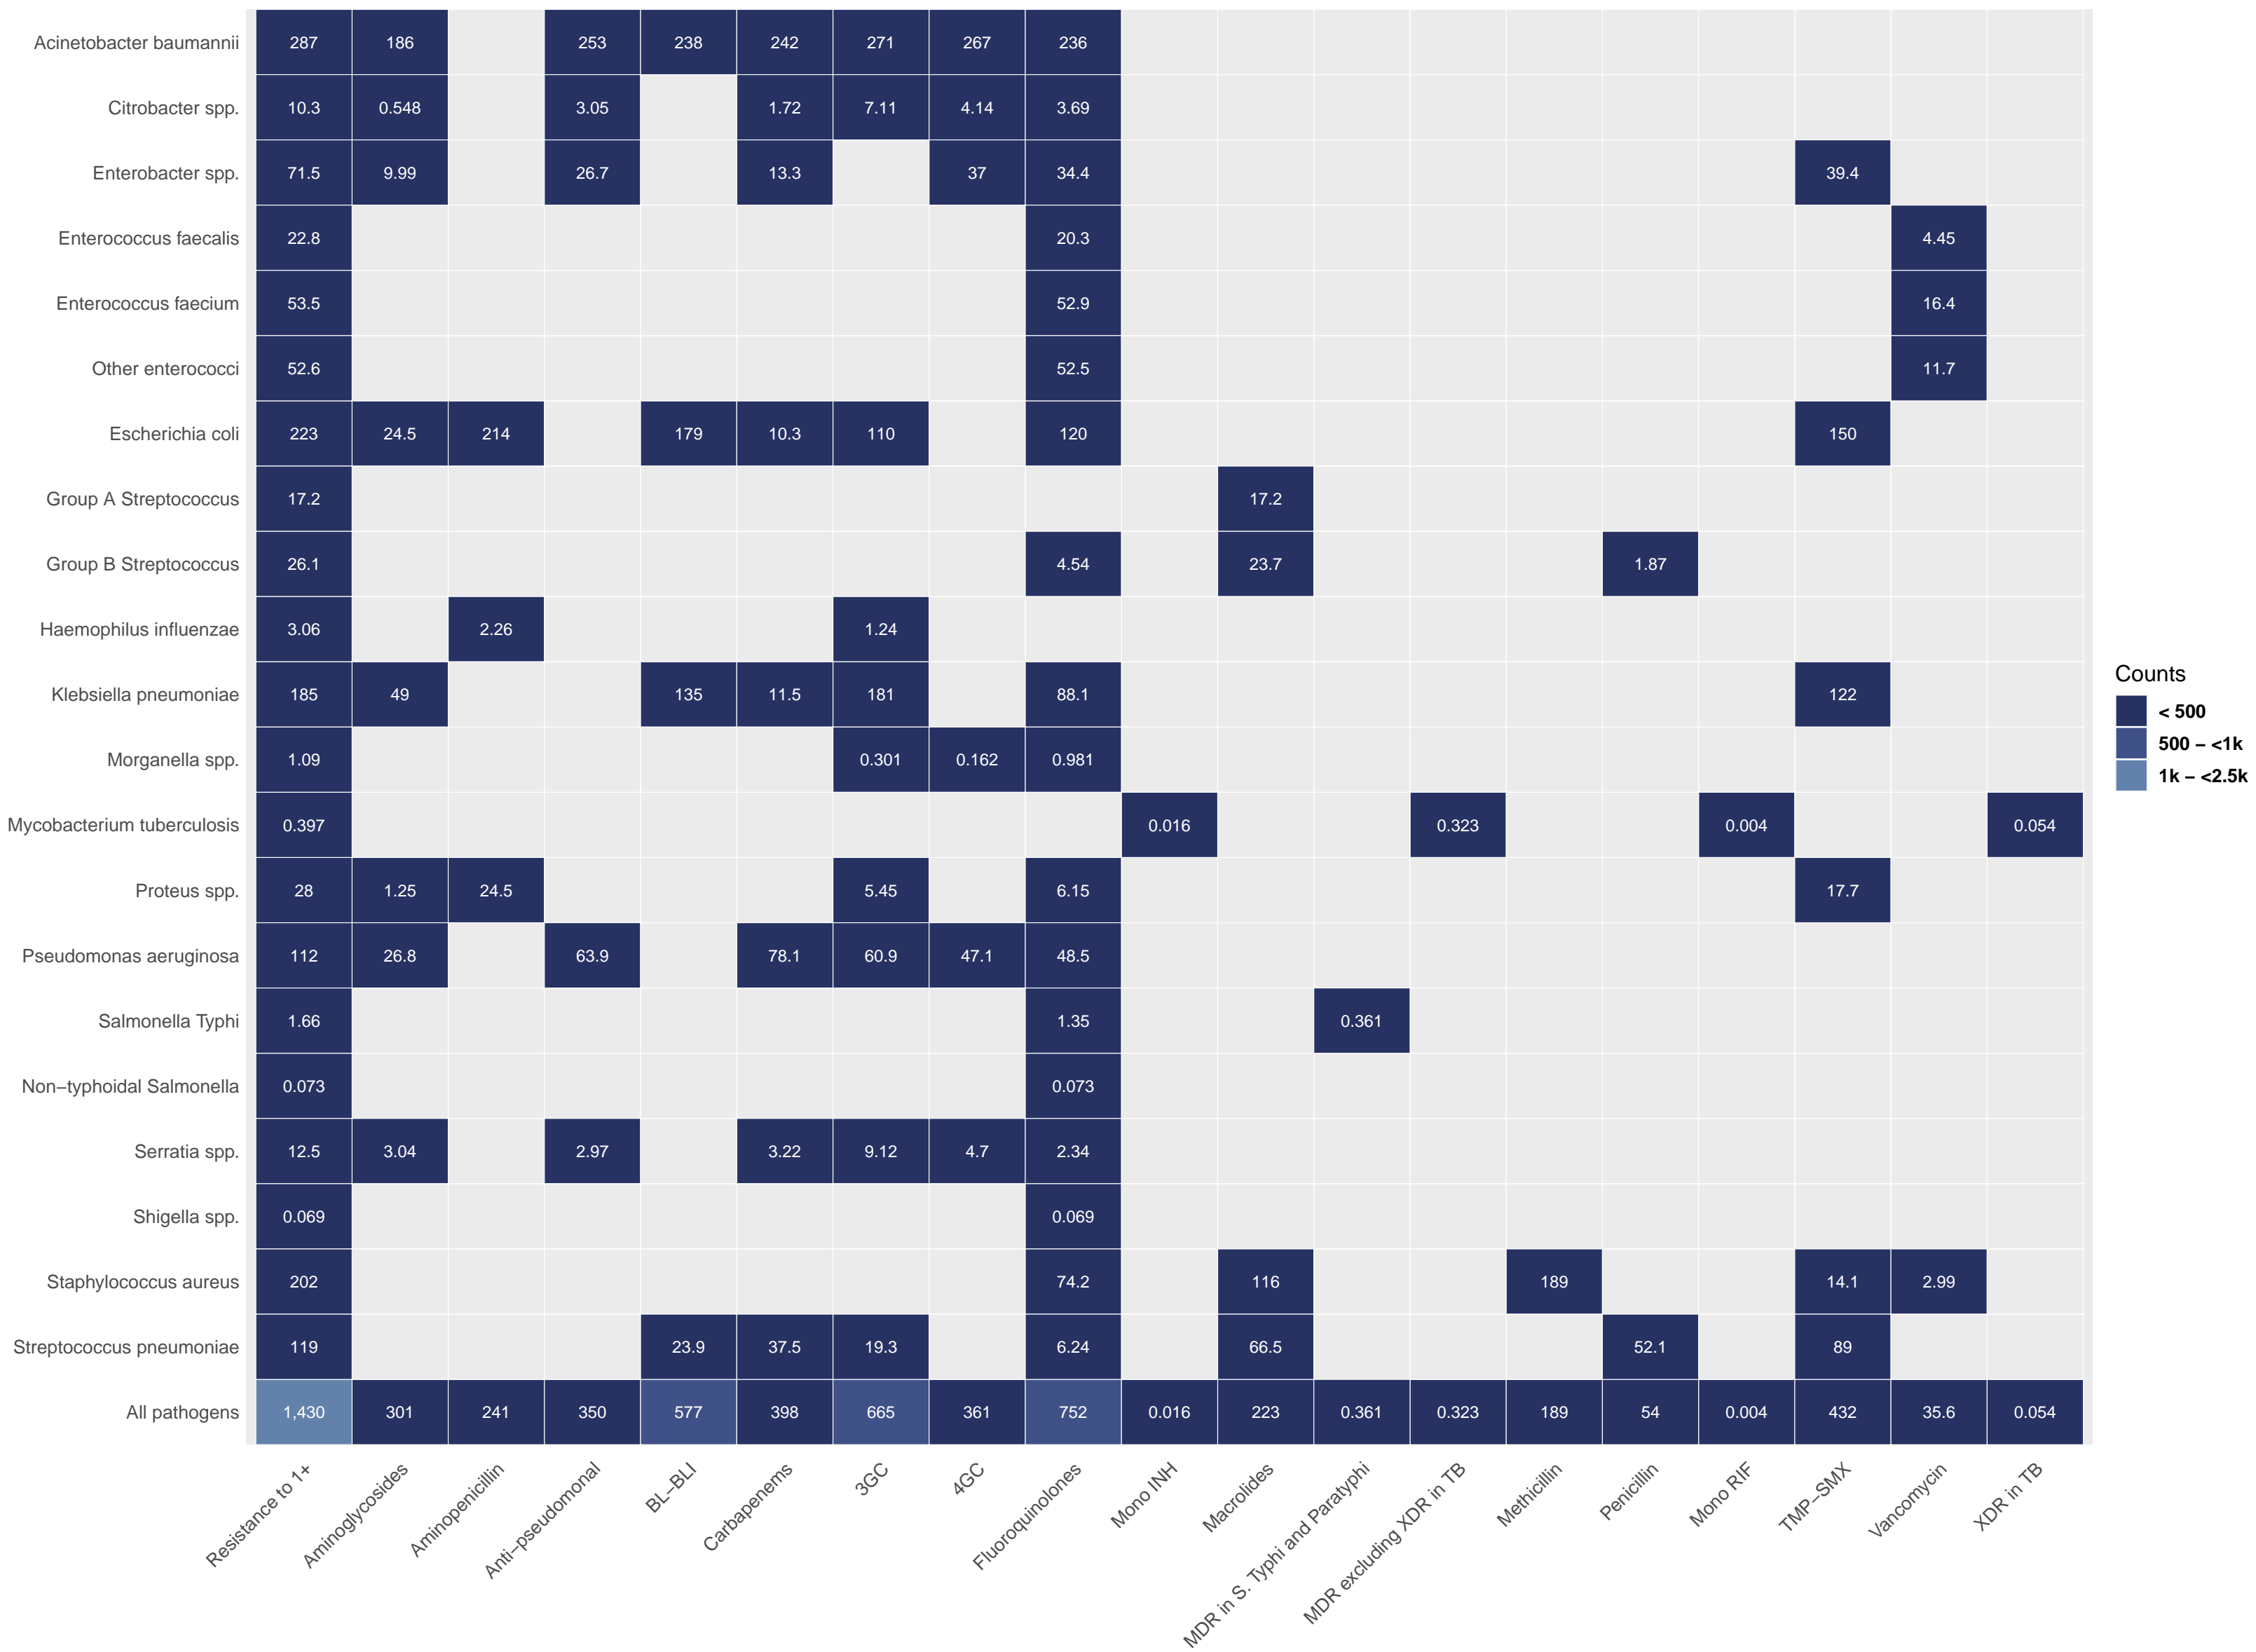

Counts

- < 500
- 500 – <1k
- 1k – <2.5k

# Jamaica

Deaths (count) *attributable to* bacterial antimicrobial resistance by pathogen–drug combinations, 2019

|                            |                  |                 |                 |                  |        |             |       |       |                  |          |            |                               |                         |             |            |          |         |            |           |       |
|----------------------------|------------------|-----------------|-----------------|------------------|--------|-------------|-------|-------|------------------|----------|------------|-------------------------------|-------------------------|-------------|------------|----------|---------|------------|-----------|-------|
| Acinetobacter baumannii    | 90.9             | 7.91            |                 | 5.26             | 0.509  | 41.2        | 4.03  | 2.89  | 29.2             |          |            |                               |                         |             |            |          |         |            |           |       |
| Citrobacter spp.           | 2.94             | 0.033           |                 | 0.637            |        | 0.443       | 0.762 | 0.446 | 0.616            |          |            |                               |                         |             |            |          |         |            |           |       |
| Enterobacter spp.          | 16.2             | 0.608           |                 | 3.02             |        | 3.21        |       | 2.56  | 4.34             |          |            |                               |                         |             |            |          | 2.41    |            |           |       |
| Enterococcus faecalis      | 6.48             |                 |                 |                  |        |             |       |       | 4.99             |          |            |                               |                         |             |            |          |         | 1.48       |           |       |
| Enterococcus faecium       | 13.9             |                 |                 |                  |        |             |       |       | 10               |          |            |                               |                         |             |            |          |         | 3.84       |           |       |
| Other enterococci          | 11.5             |                 |                 |                  |        |             |       |       | 9.54             |          |            |                               |                         |             |            |          |         | 1.96       |           |       |
| Escherichia coli           | 54               | 1.54            | 2.75            |                  | 9.52   | 2.4         | 16    |       | 12.6             |          |            |                               |                         |             |            |          |         | 9.15       |           |       |
| Group A Streptococcus      | 1.66             |                 |                 |                  |        |             |       |       |                  |          | 1.66       |                               |                         |             |            |          |         |            |           |       |
| Group B Streptococcus      | 3.52             |                 |                 |                  |        |             |       |       | 0.759            |          | 2.42       |                               |                         | 0.344       |            |          |         |            |           |       |
| Haemophilus influenzae     | 0.707            |                 | 0.343           |                  |        |             | 0.364 |       |                  |          |            |                               |                         |             |            |          |         |            |           |       |
| Klebsiella pneumoniae      | 52.8             | 3.85            |                 |                  | 0.356  | 3.13        | 32.9  |       | 6.32             |          |            |                               |                         |             |            |          |         | 6.2        |           |       |
| Morganella spp.            | 0.25             |                 |                 |                  |        |             | 0.04  | 0.028 | 0.181            |          |            |                               |                         |             |            |          |         |            |           |       |
| Mycobacterium tuberculosis | 0.227            |                 |                 |                  |        |             |       |       |                  | 0.002    |            |                               | 0.191                   |             |            | 0.001    |         |            | 0.033     |       |
| Proteus spp.               | 3.23             | 0.088           | 0.582           |                  |        |             | 1.33  |       | 0.467            |          |            |                               |                         |             |            |          |         | 0.767      |           |       |
| Pseudomonas aeruginosa     | 28.2             | 0.71            |                 | 4.87             |        | 15          | 1.98  | 0.626 | 5.06             |          |            |                               |                         |             |            |          |         |            |           |       |
| Salmonella Typhi           | 0.322            |                 |                 |                  |        |             |       |       | 0.277            |          |            | 0.045                         |                         |             |            |          |         |            |           |       |
| Non-typhoidal Salmonella   | 0.015            |                 |                 |                  |        |             |       |       | 0.015            |          |            |                               |                         |             |            |          |         |            |           |       |
| Serratia spp.              | 3.32             | 0.182           |                 | 0.625            |        | 0.893       | 0.905 | 0.46  | 0.255            |          |            |                               |                         |             |            |          |         |            |           |       |
| Shigella spp.              | 0.014            |                 |                 |                  |        |             |       |       | 0.014            |          |            |                               |                         |             |            |          |         |            |           |       |
| Staphylococcus aureus      | 62.1             |                 |                 |                  |        |             |       |       | 3.37             |          | 4.21       |                               | 52.7                    |             |            |          |         | 1.1        | 0.709     |       |
| Streptococcus pneumoniae   | 24               |                 |                 |                  | 0.535  | 8.21        | 0.552 |       | 0.74             |          | 2.7        |                               |                         | 3.24        |            |          |         | 7.99       |           |       |
| All pathogens              | 376              | 14.9            | 3.67            | 14.4             | 10.9   | 74.4        | 58.9  | 7.01  | 88.8             | 0.002    | 11         | 0.045                         | 0.191                   | 52.7        | 3.58       | 0.001    |         | 27.6       | 7.99      | 0.033 |
|                            | Resistance to 1+ | Aminoglycosides | Aminopenicillin | Anti-pseudomonal | BL-BLI | Carbapenems | 3GC   | 4GC   | Fluoroquinolones | Mono INH | Macrolides | MDR in S. Typhi and Paratyphi | MDR excluding XDR in TB | Methicillin | Penicillin | Mono RIF | TMP-SMX | Vancomycin | XDR in TB |       |

Counts  
 < 500

# Mexico

Deaths (count) associated with bacterial antimicrobial resistance by pathogen–drug combinations, 2019

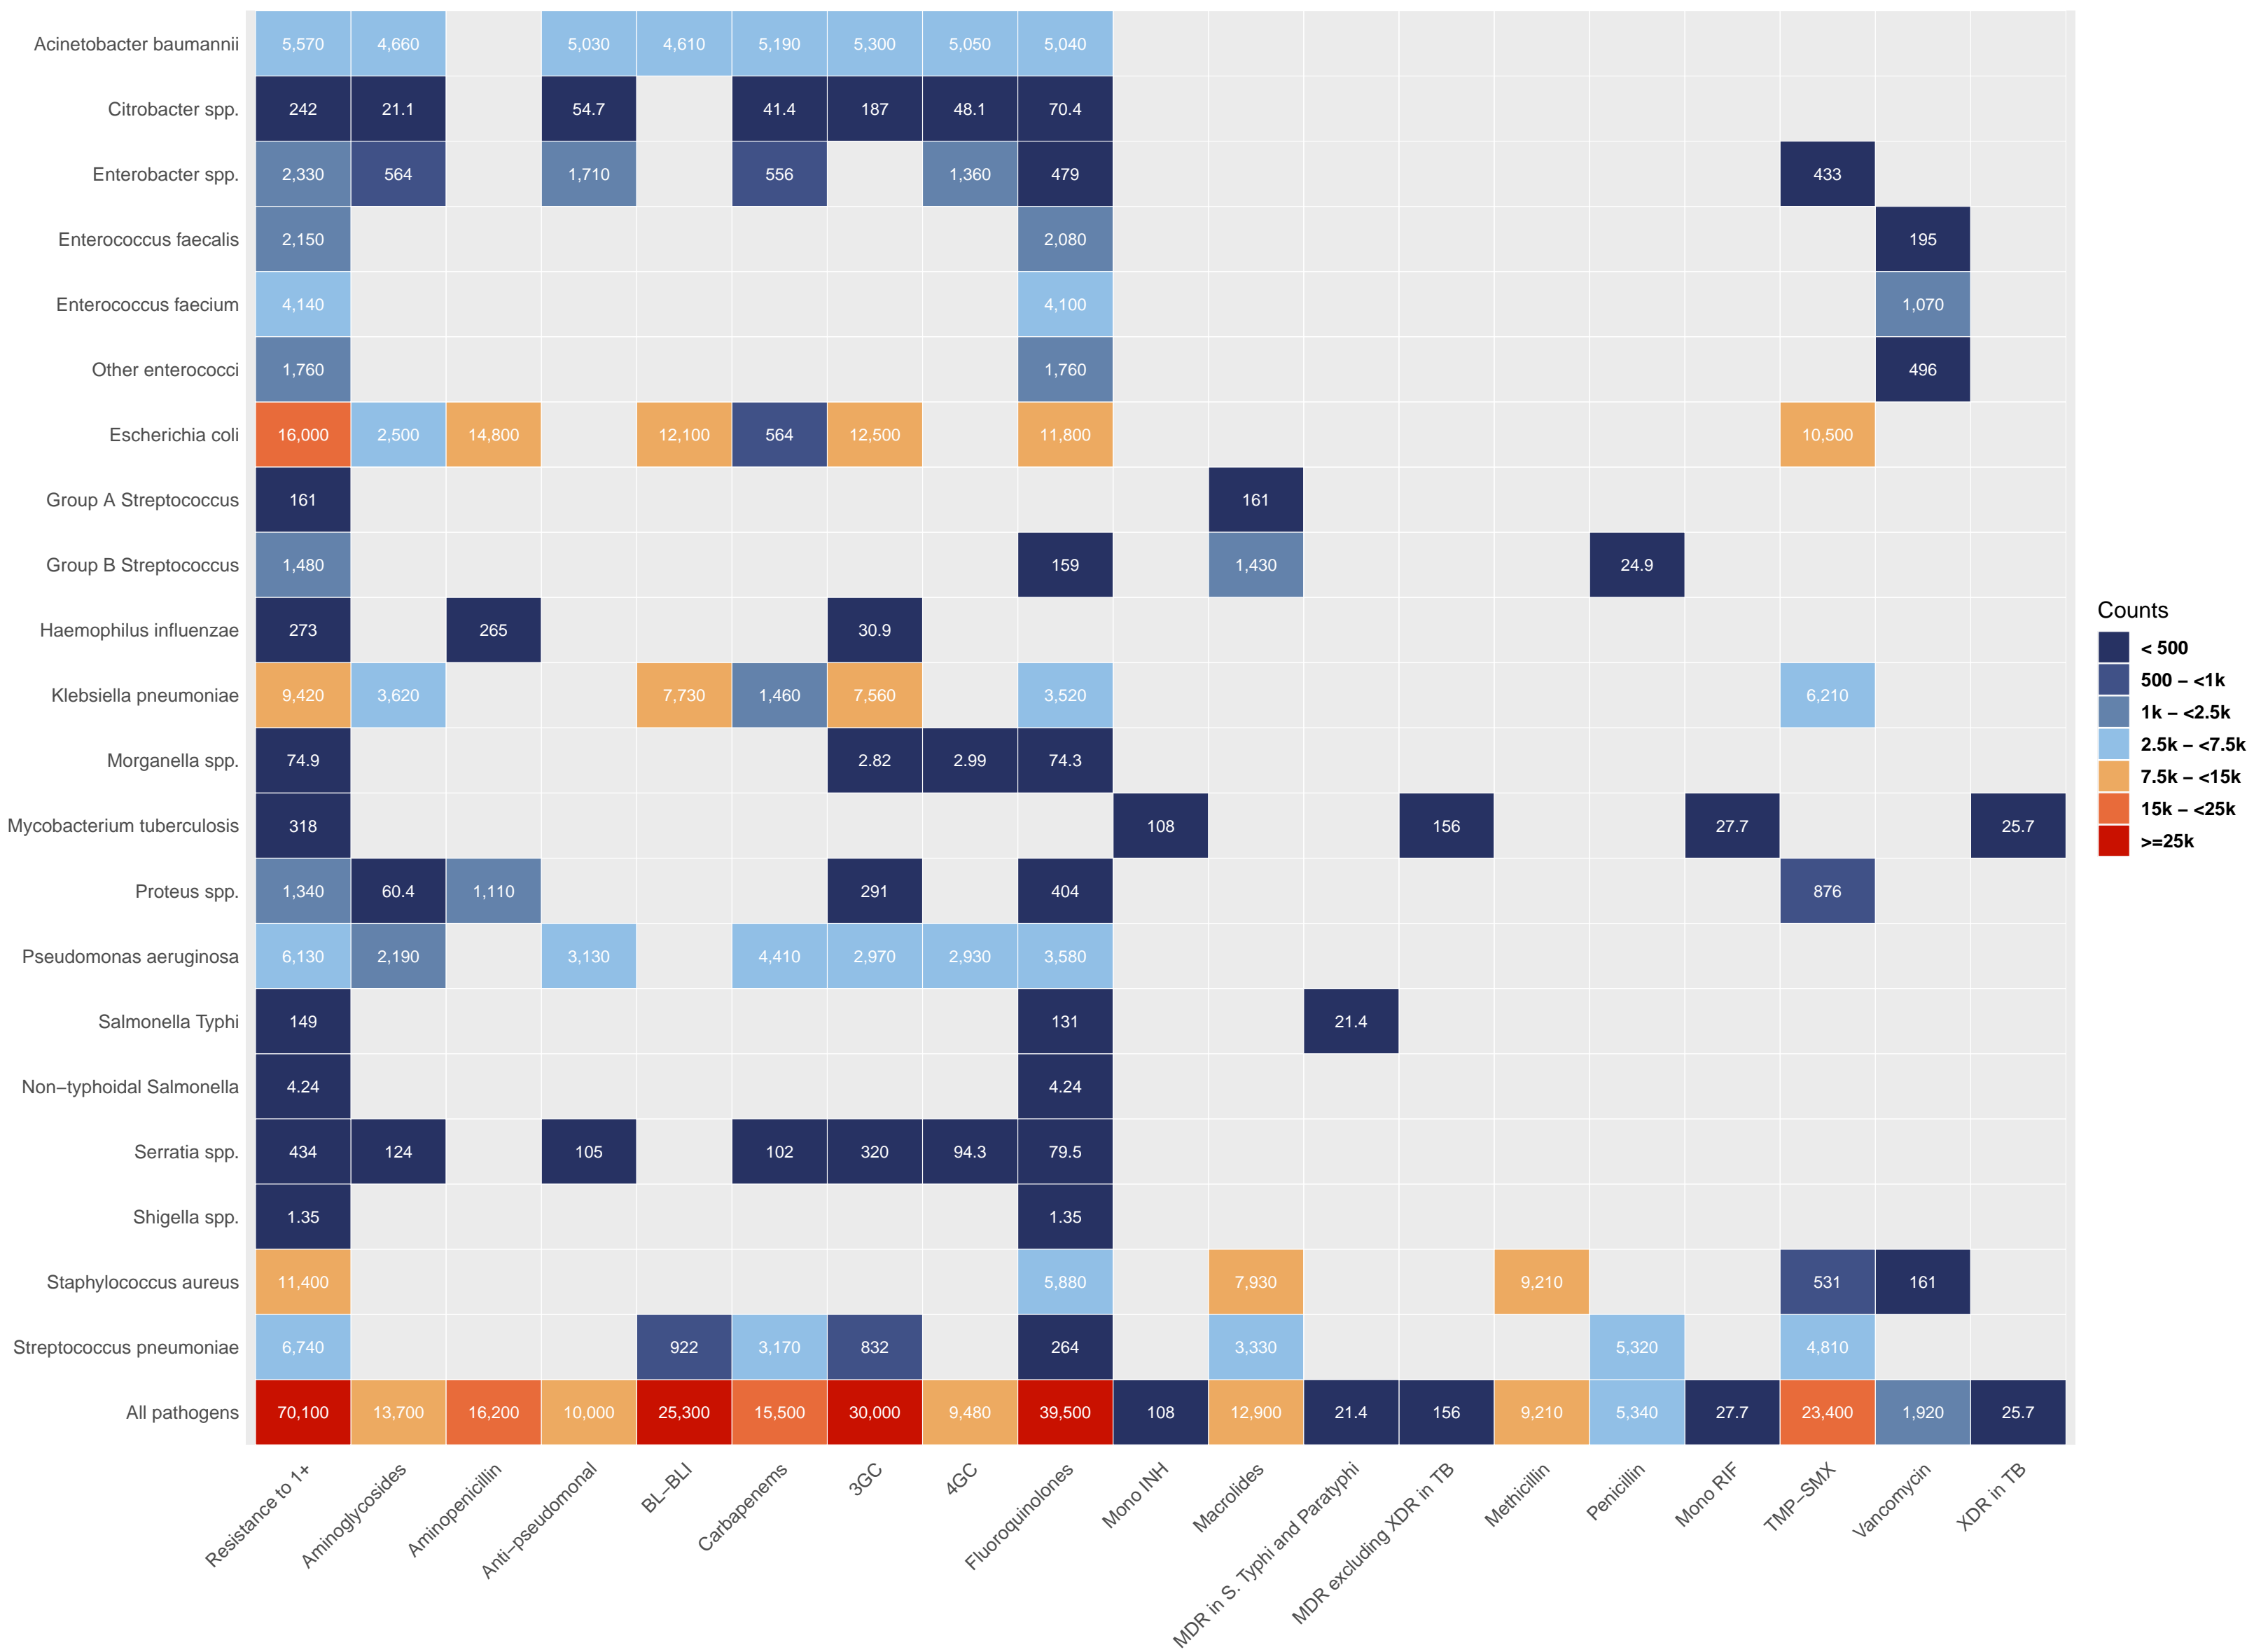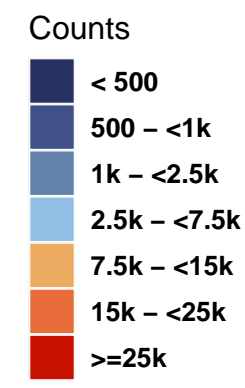



# Mexico

Deaths (count) *attributable to* bacterial antimicrobial resistance by pathogen–drug combinations, 2019

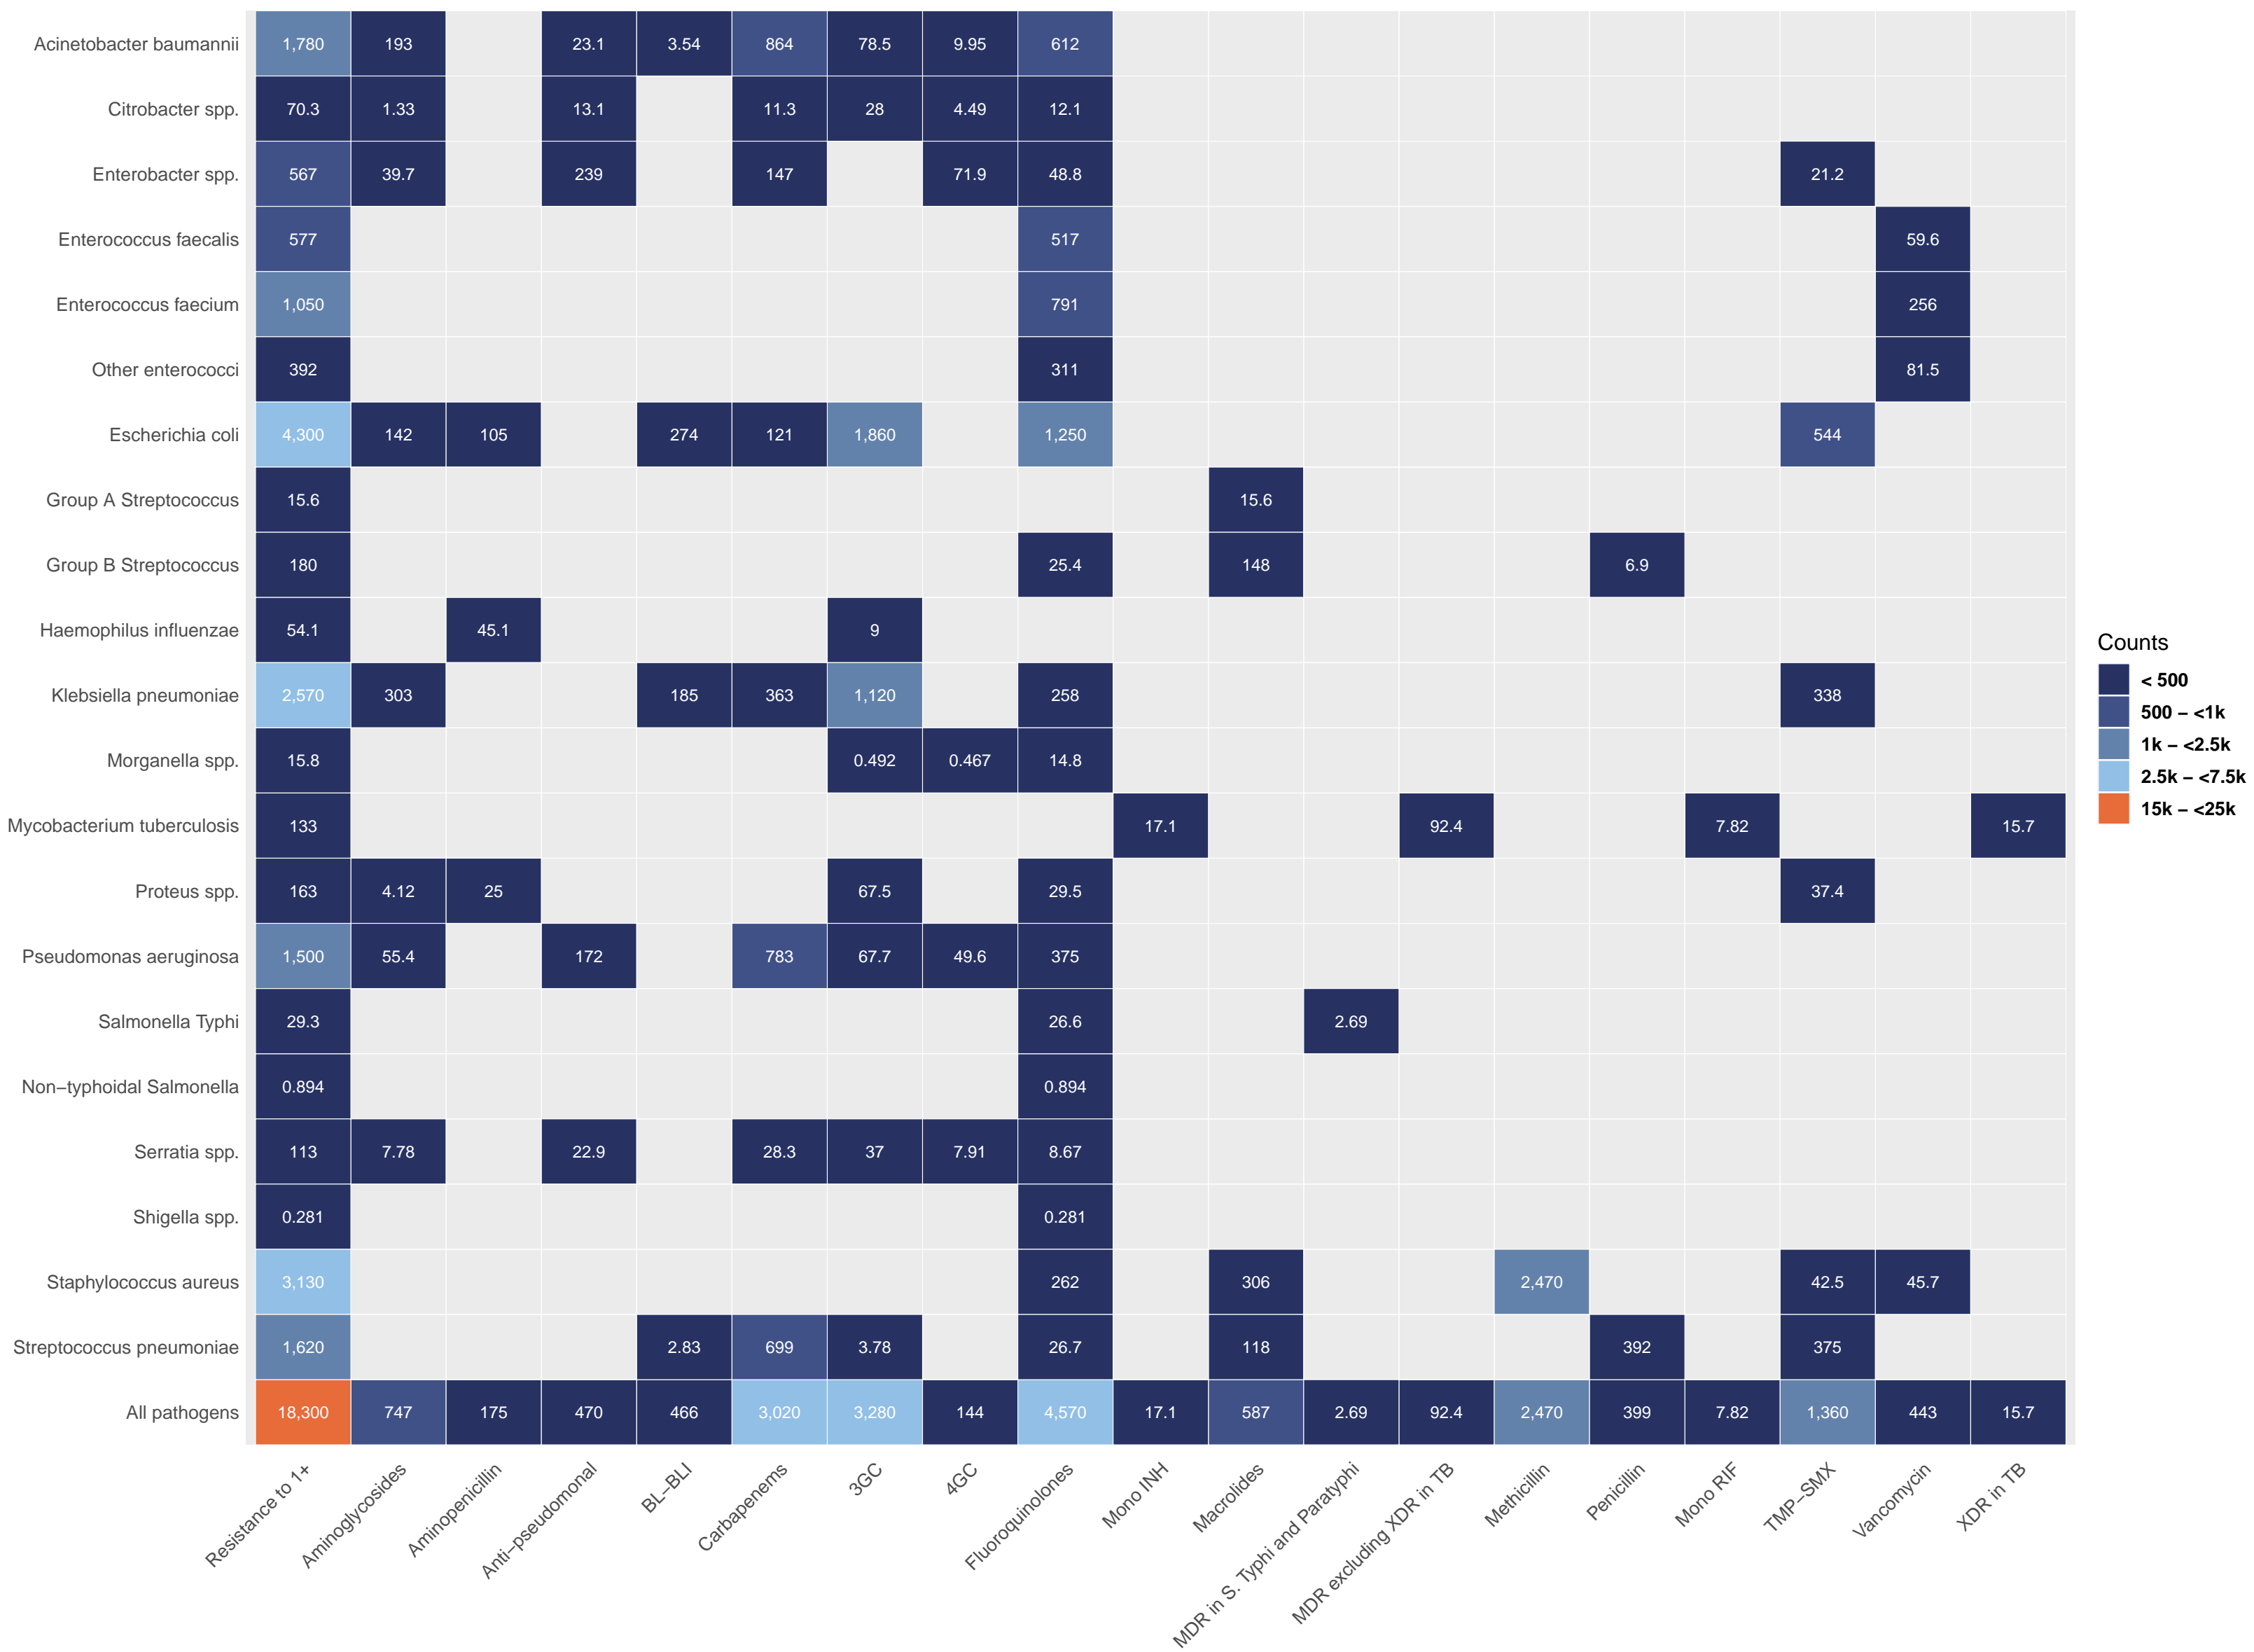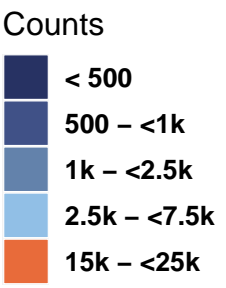

# Nicaragua

Deaths (count) associated with bacterial antimicrobial resistance by pathogen–drug combinations, 2019

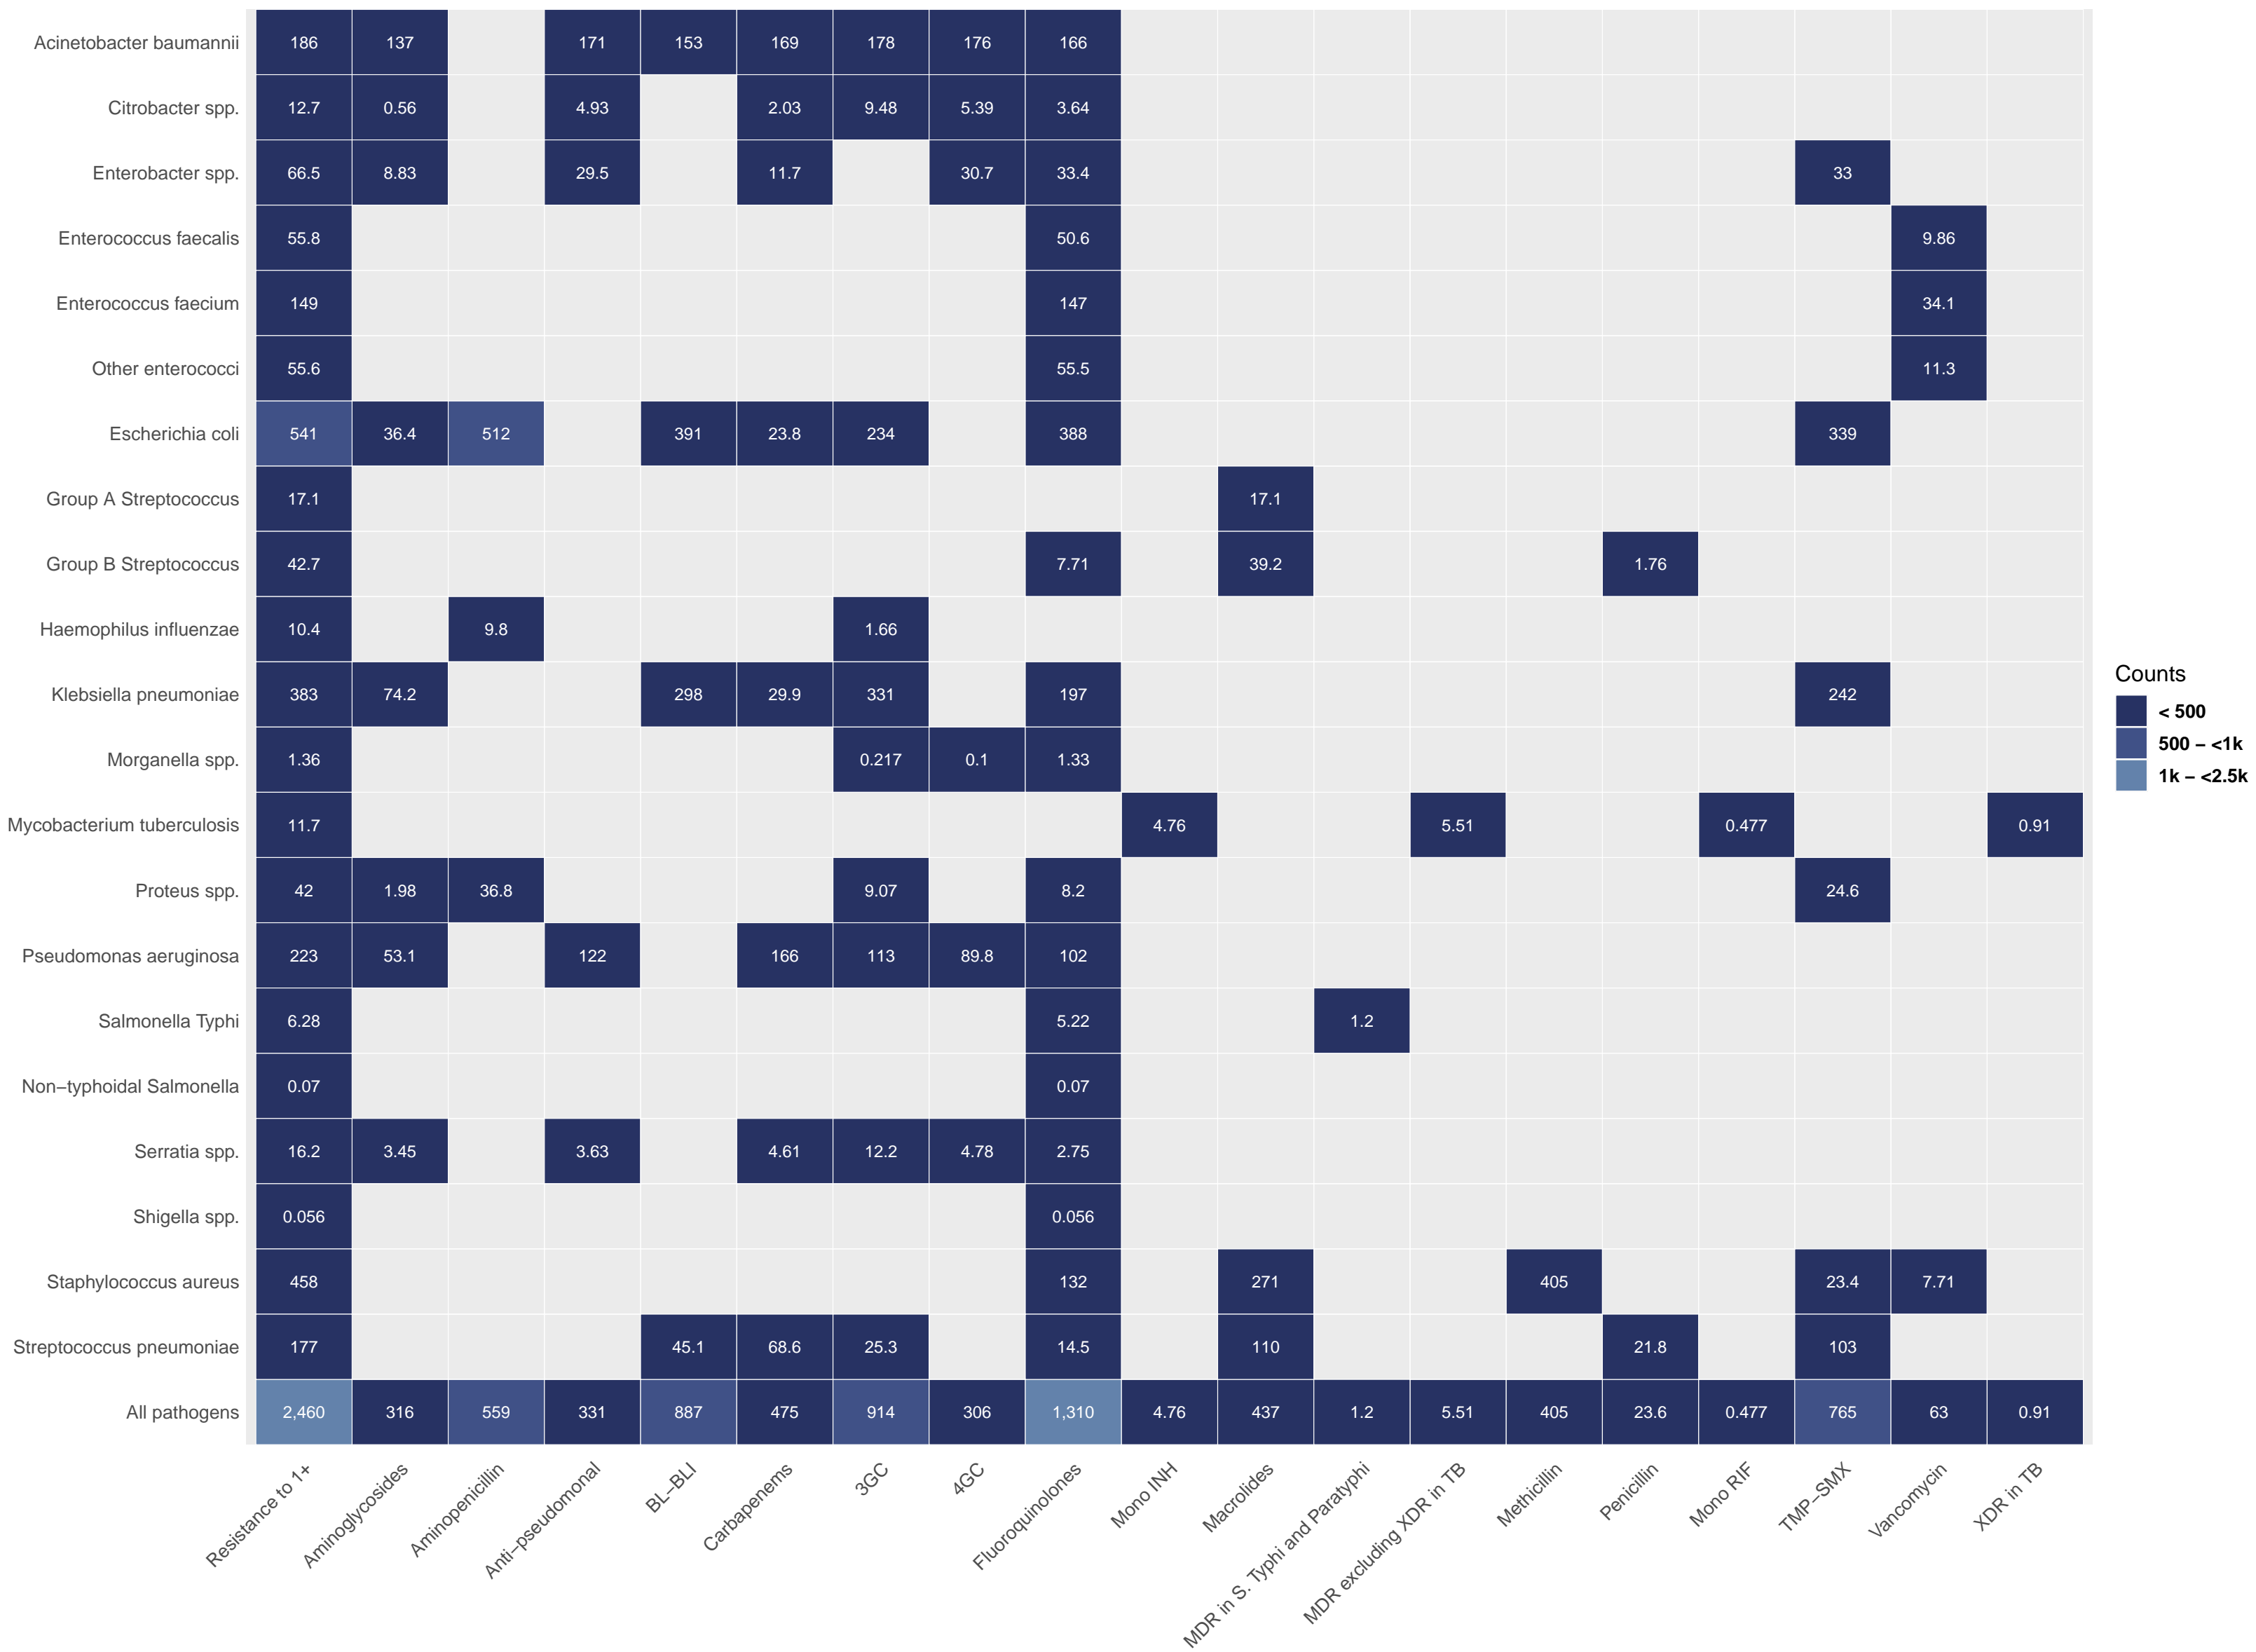

Counts

- < 500
- 500 – <1k
- 1k – <2.5k

# Nicaragua

Deaths (count) *attributable to* bacterial antimicrobial resistance by pathogen–drug combinations, 2019

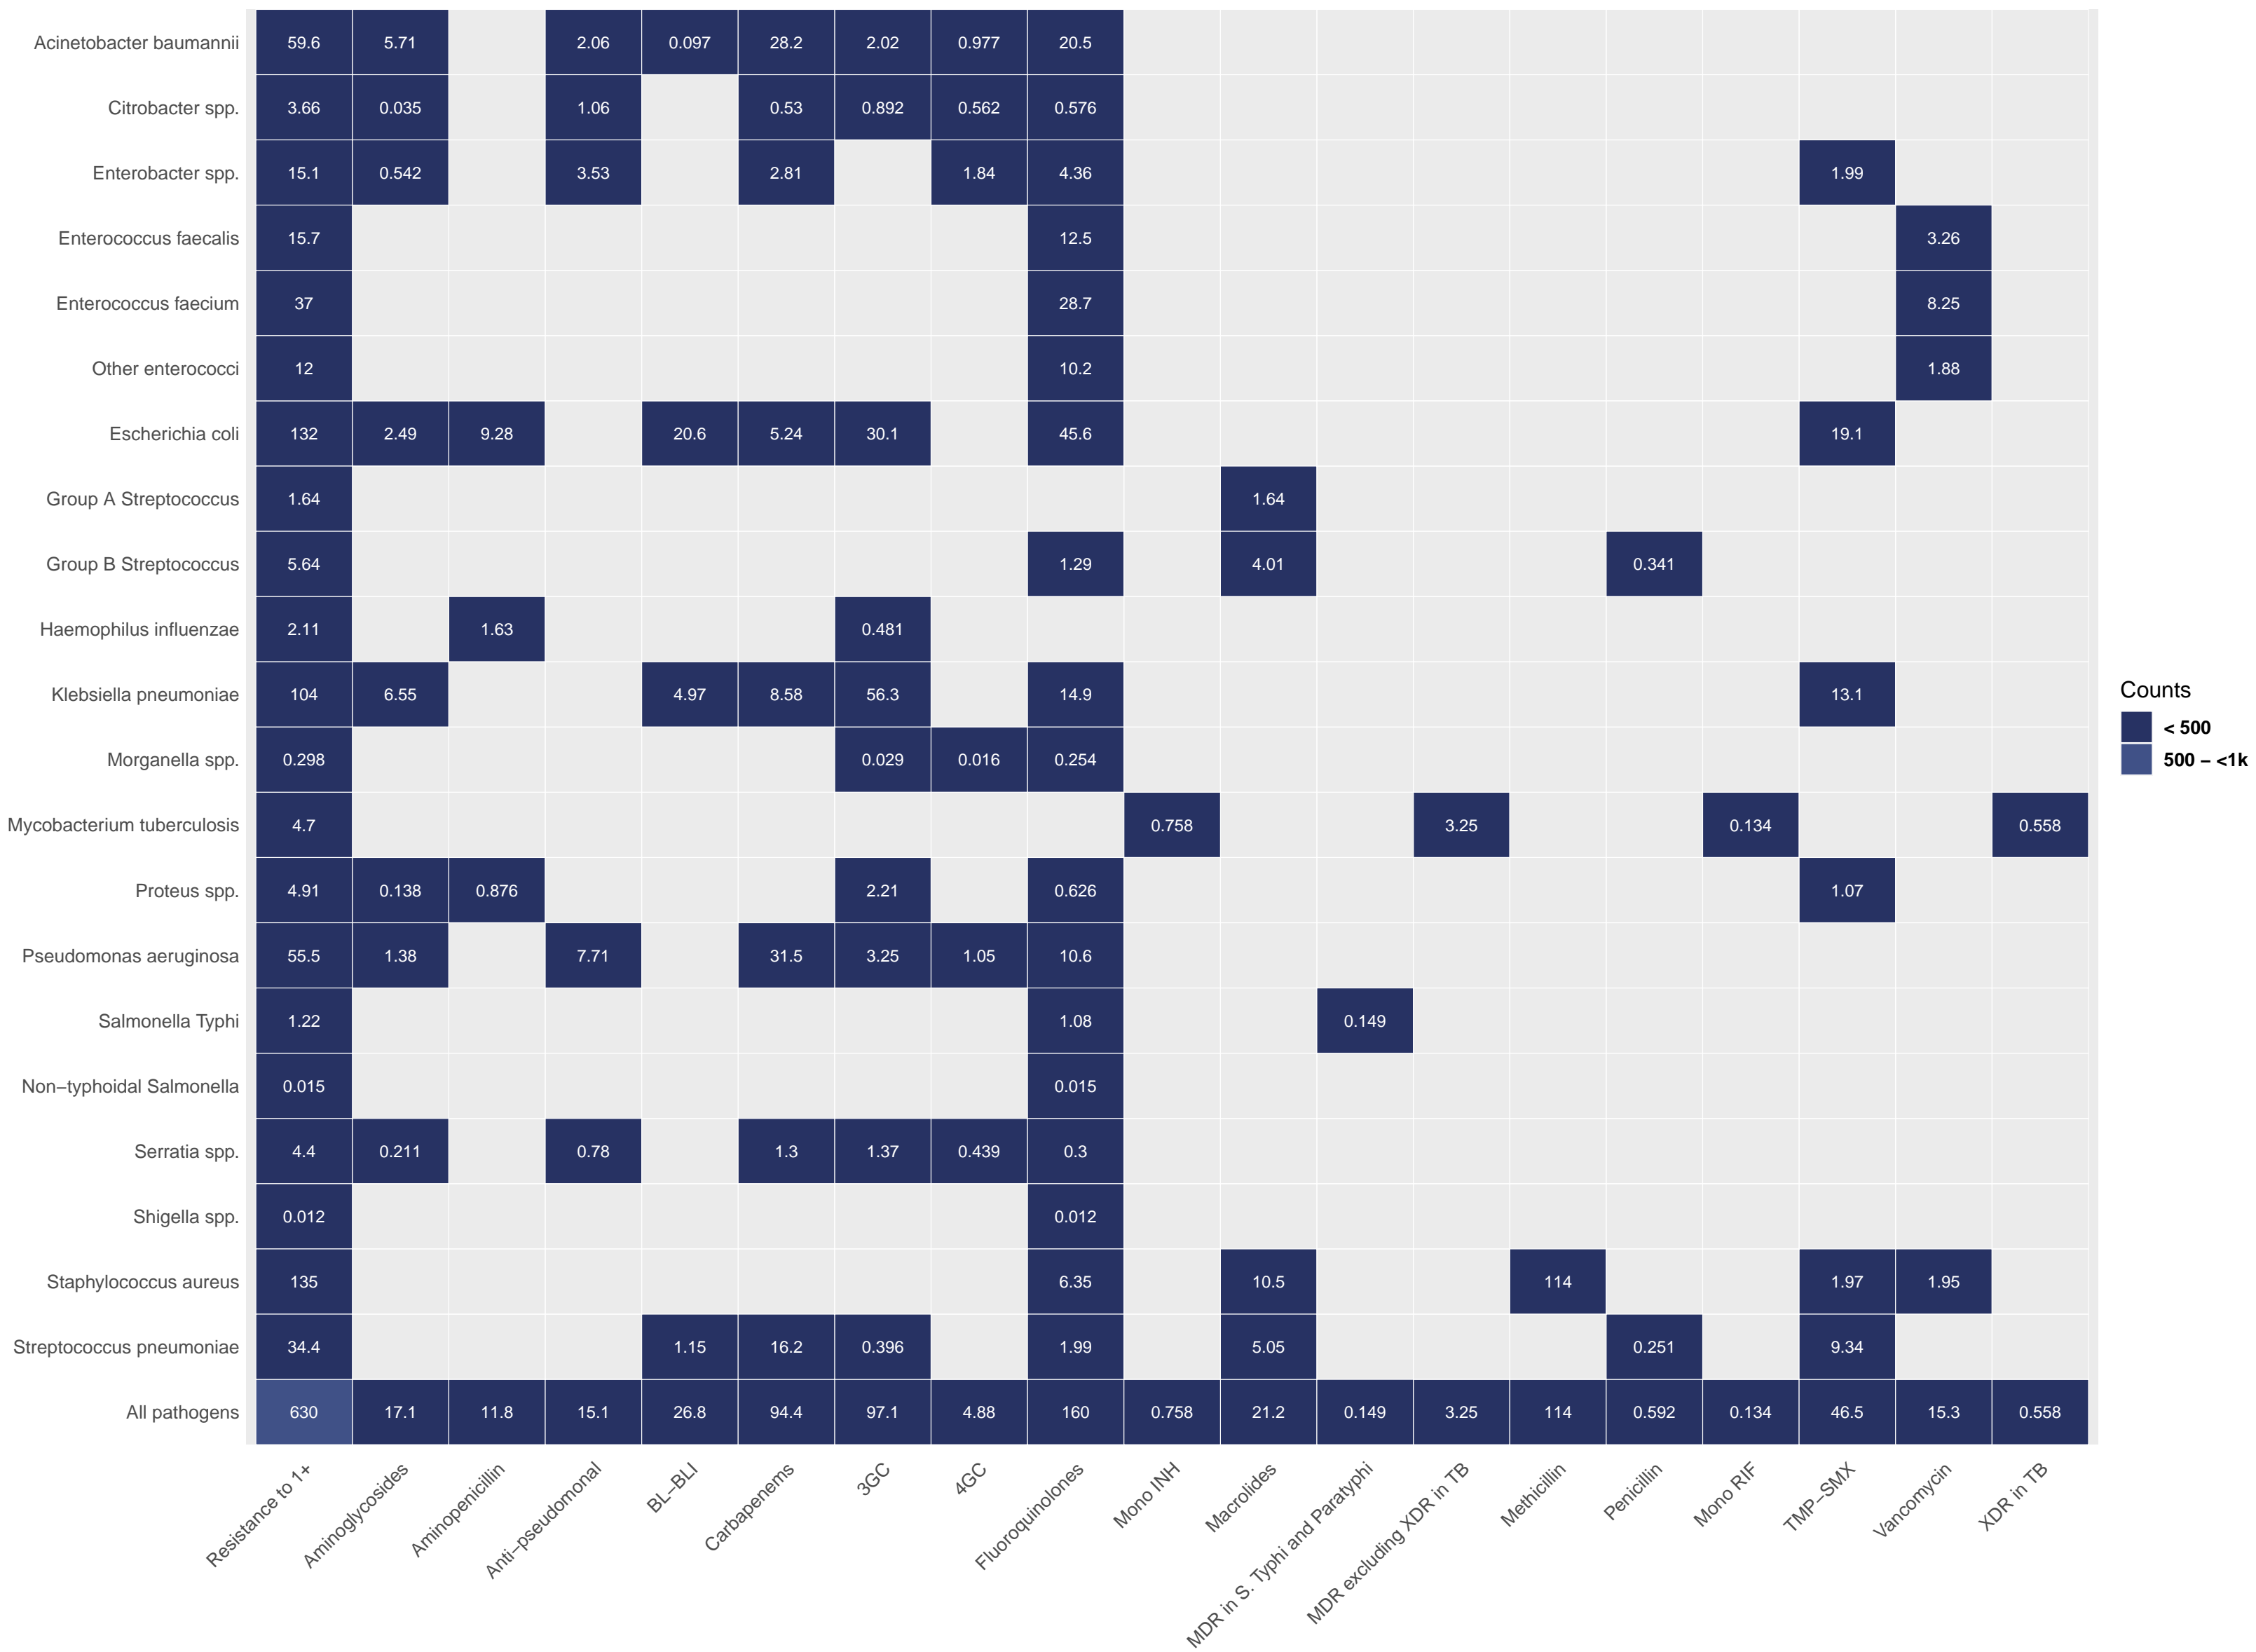

# Panama

Deaths (count) associated with bacterial antimicrobial resistance by pathogen–drug combinations, 2019

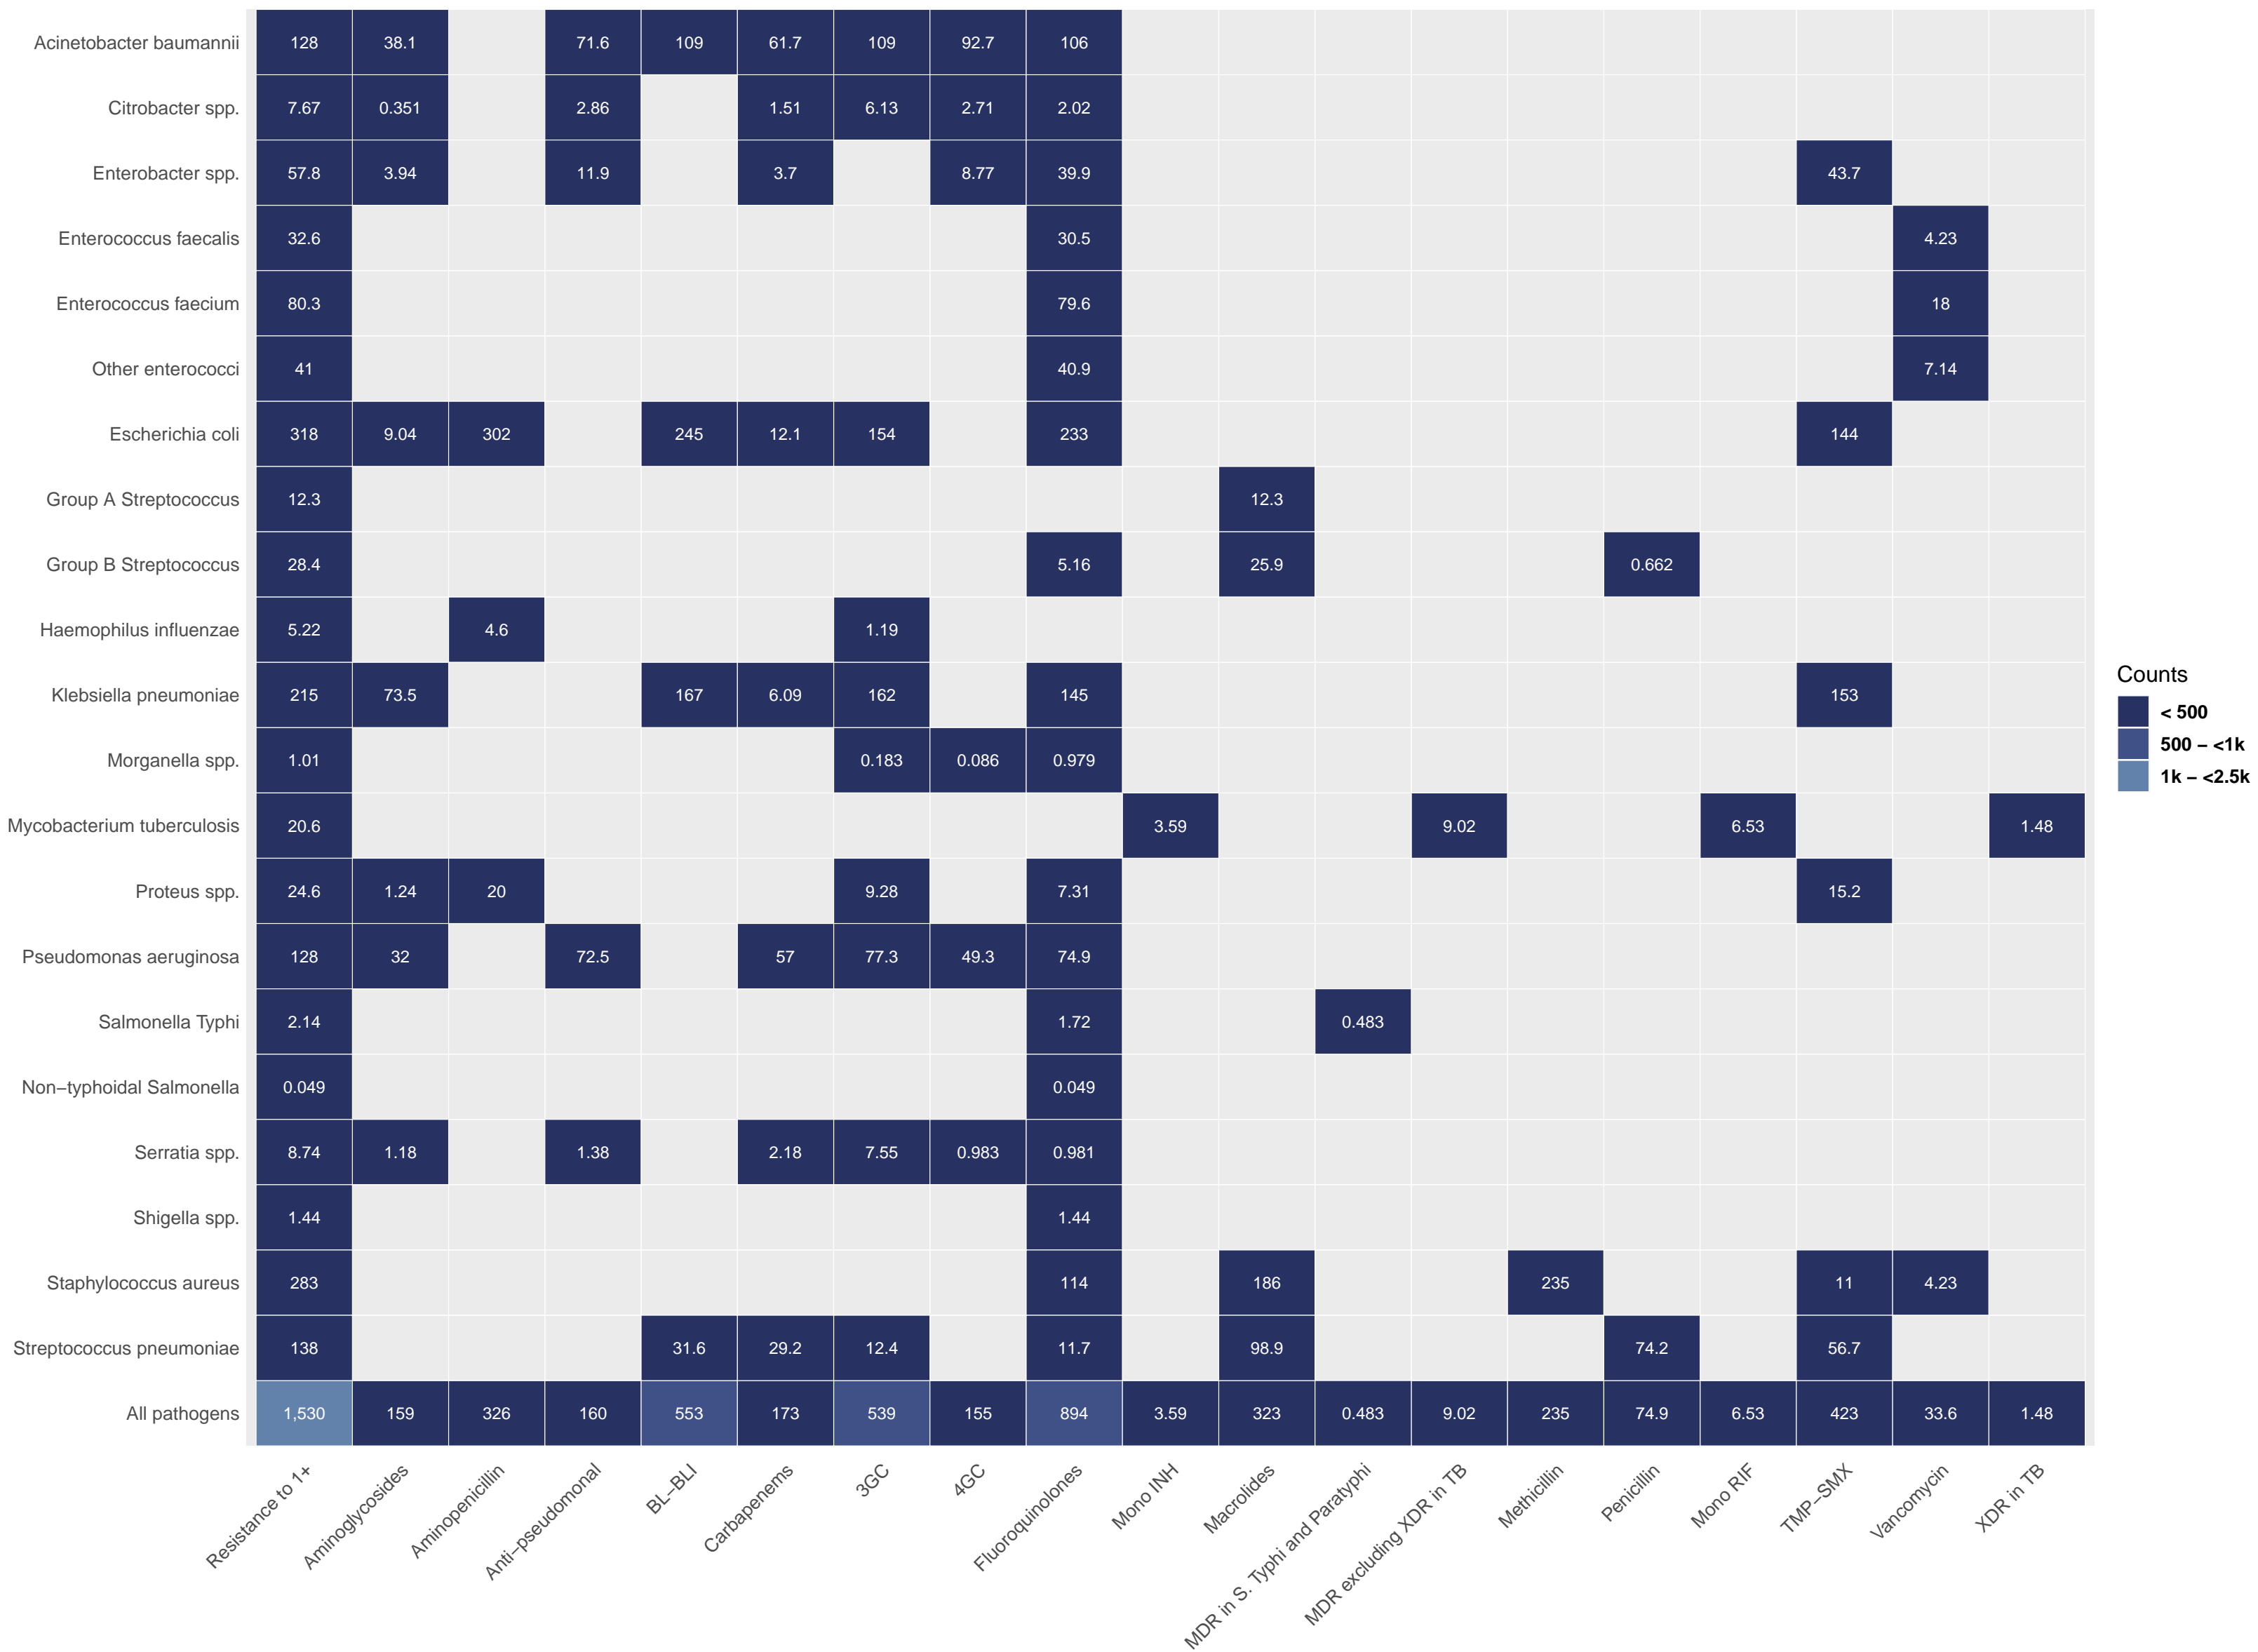

Counts

- < 500
- 500 – <1k
- 1k – <2.5k

# Panama

Deaths (count) *attributable to* bacterial antimicrobial resistance by pathogen–drug combinations, 2019

|                            |                  |                 |                 |                  |        |             |       |       |                  |          |            |                               |                         |             |            |          |         |            |           |
|----------------------------|------------------|-----------------|-----------------|------------------|--------|-------------|-------|-------|------------------|----------|------------|-------------------------------|-------------------------|-------------|------------|----------|---------|------------|-----------|
| Acinetobacter baumannii    | 38.3             | 1.76            |                 | 2.74             | 1.53   | 10.1        | 5.56  | 2.17  | 14.4             |          |            |                               |                         |             |            |          |         |            |           |
| Citrobacter spp.           | 2.25             | 0.021           |                 | 0.609            |        | 0.398       | 0.654 | 0.252 | 0.313            |          |            |                               |                         |             |            |          |         |            |           |
| Enterobacter spp.          | 11.3             | 0.327           |                 | 1.08             |        | 0.756       |       | 0.336 | 5.96             |          |            |                               |                         |             |            |          | 2.86    |            |           |
| Enterococcus faecalis      | 8.93             |                 |                 |                  |        |             |       |       | 7.58             |          |            |                               |                         |             |            |          |         | 1.36       |           |
| Enterococcus faecium       | 20               |                 |                 |                  |        |             |       |       | 15.6             |          |            |                               |                         |             |            |          |         | 4.34       |           |
| Other enterococci          | 8.77             |                 |                 |                  |        |             |       |       | 7.59             |          |            |                               |                         |             |            |          |         | 1.18       |           |
| Escherichia coli           | 79               | 0.798           | 4.64            |                  | 13.1   | 2.71        | 21.2  |       | 28.6             |          |            |                               |                         |             |            |          |         | 7.96       |           |
| Group A Streptococcus      | 1.17             |                 |                 |                  |        |             |       |       |                  |          | 1.17       |                               |                         |             |            |          |         |            |           |
| Group B Streptococcus      | 3.71             |                 |                 |                  |        |             |       |       | 0.873            |          | 2.68       |                               |                         | 0.157       |            |          |         |            |           |
| Haemophilus influenzae     | 1.1              |                 | 0.75            |                  |        |             | 0.352 |       |                  |          |            |                               |                         |             |            |          |         |            |           |
| Klebsiella pneumoniae      | 54.3             | 5.65            |                 |                  | 3.79   | 2.35        | 24    |       | 10.6             |          |            |                               |                         |             |            |          |         | 7.9        |           |
| Morganella spp.            | 0.224            |                 |                 |                  |        |             | 0.024 | 0.014 | 0.186            |          |            |                               |                         |             |            |          |         |            |           |
| Mycobacterium tuberculosis | 8.71             |                 |                 |                  |        |             |       |       |                  | 0.58     |            |                               | 5.39                    |             |            | 1.83     |         |            | 0.908     |
| Proteus spp.               | 3.66             | 0.084           | 0.371           |                  |        |             | 2.03  |       | 0.525            |          |            |                               |                         |             |            |          |         | 0.643      |           |
| Pseudomonas aeruginosa     | 32               | 0.819           |                 | 8.14             |        | 9.89        | 3.94  | 0.729 | 8.53             |          |            |                               |                         |             |            |          |         |            |           |
| Salmonella Typhi           | 0.411            |                 |                 |                  |        |             |       |       | 0.35             |          |            | 0.062                         |                         |             |            |          |         |            |           |
| Non-typhoidal Salmonella   | 0.01             |                 |                 |                  |        |             |       |       | 0.01             |          |            |                               |                         |             |            |          |         |            |           |
| Serratia spp.              | 2.44             | 0.07            |                 | 0.337            |        | 0.621       | 1.21  | 0.089 | 0.107            |          |            |                               |                         |             |            |          |         |            |           |
| Shigella spp.              | 0.301            |                 |                 |                  |        |             |       |       | 0.301            |          |            |                               |                         |             |            |          |         |            |           |
| Staphylococcus aureus      | 79.2             |                 |                 |                  |        |             |       |       | 5.2              |          | 7.37       |                               | 64.6                    |             |            |          | 0.921   | 1.15       |           |
| Streptococcus pneumoniae   | 26.5             |                 |                 |                  | 1.39   | 6.96        | 0.665 |       | 1.63             |          | 4.52       |                               |                         | 6.72        |            |          | 4.6     |            |           |
| All pathogens              | 382              | 9.53            | 5.76            | 12.9             | 19.8   | 33.8        | 59.7  | 3.59  | 108              | 0.58     | 15.7       | 0.062                         | 5.39                    | 64.6        | 6.88       | 1.83     | 24.9    | 8.03       | 0.908     |
|                            | Resistance to 1+ | Aminoglycosides | Aminopenicillin | Anti-pseudomonal | BL-BLI | Carbapenems | 3GC   | 4GC   | Fluoroquinolones | Mono INH | Macrolides | MDR in S. Typhi and Paratyphi | MDR excluding XDR in TB | Methicillin | Penicillin | Mono RIF | TMP-SMX | Vancomycin | XDR in TB |

Counts

< 500

# Paraguay

Deaths (count) associated with bacterial antimicrobial resistance by pathogen–drug combinations, 2019

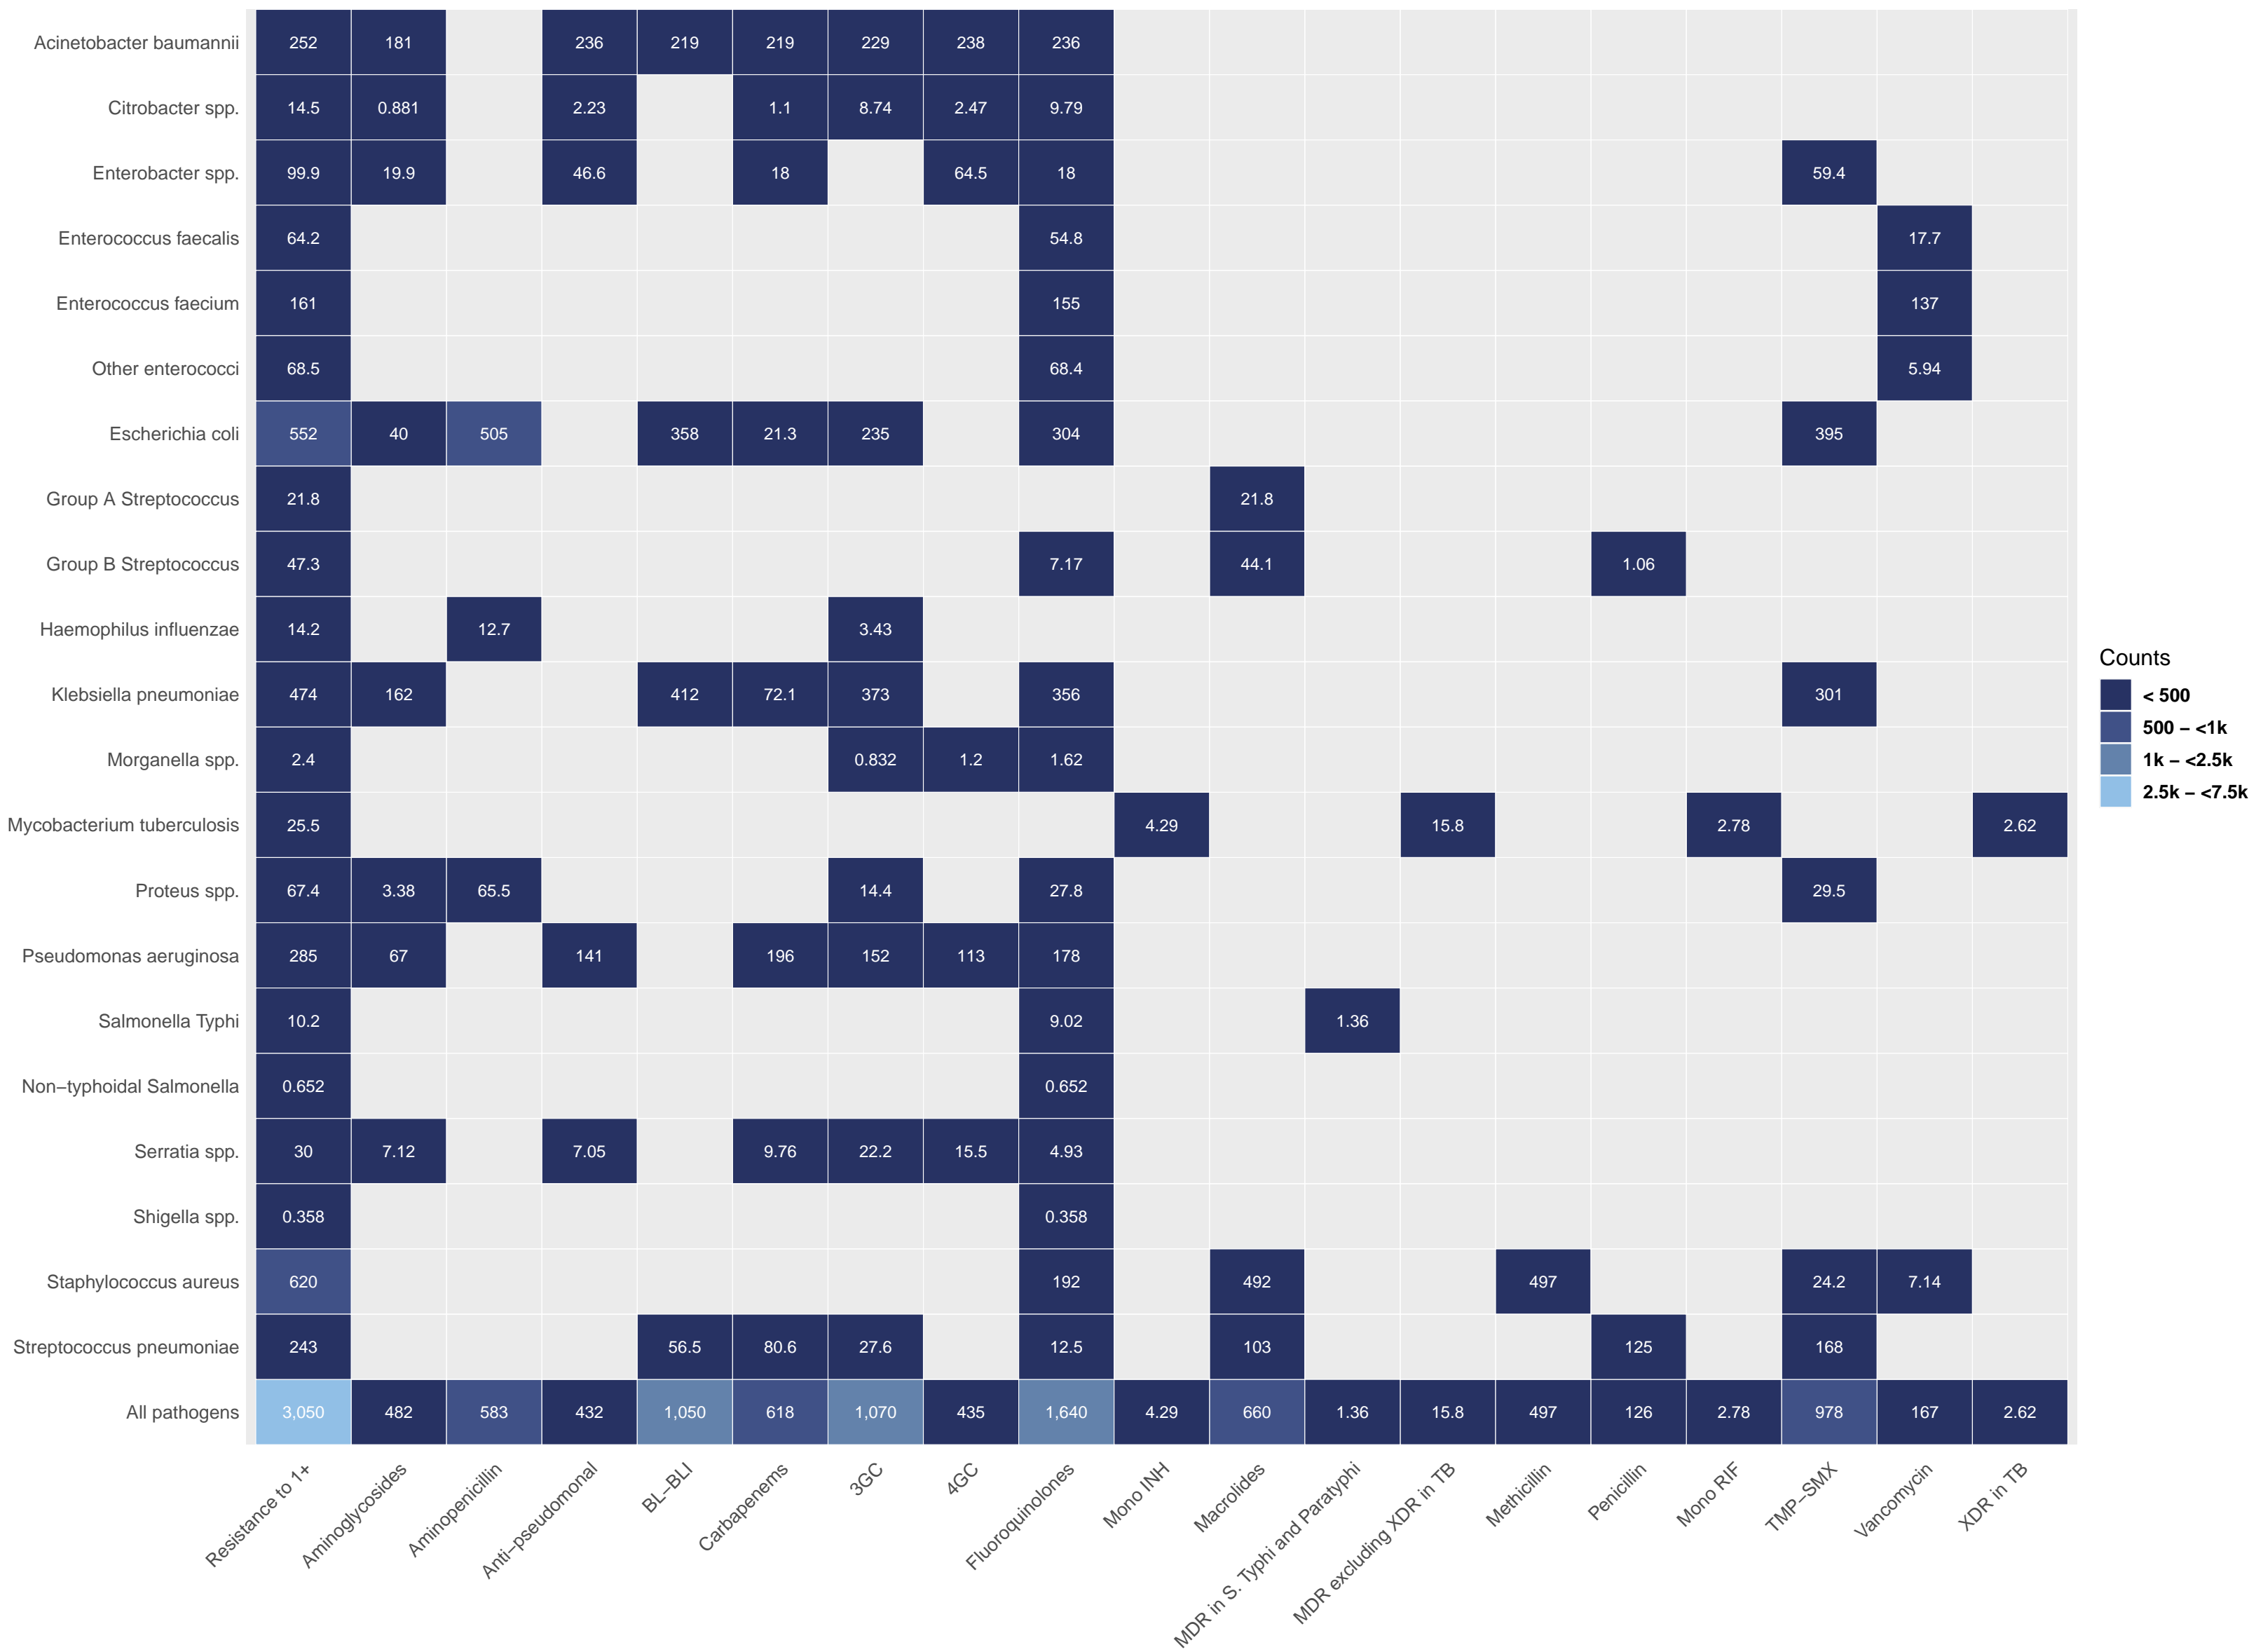

# Paraguay

Deaths (count) *attributable to* bacterial antimicrobial resistance by pathogen–drug combinations, 2019

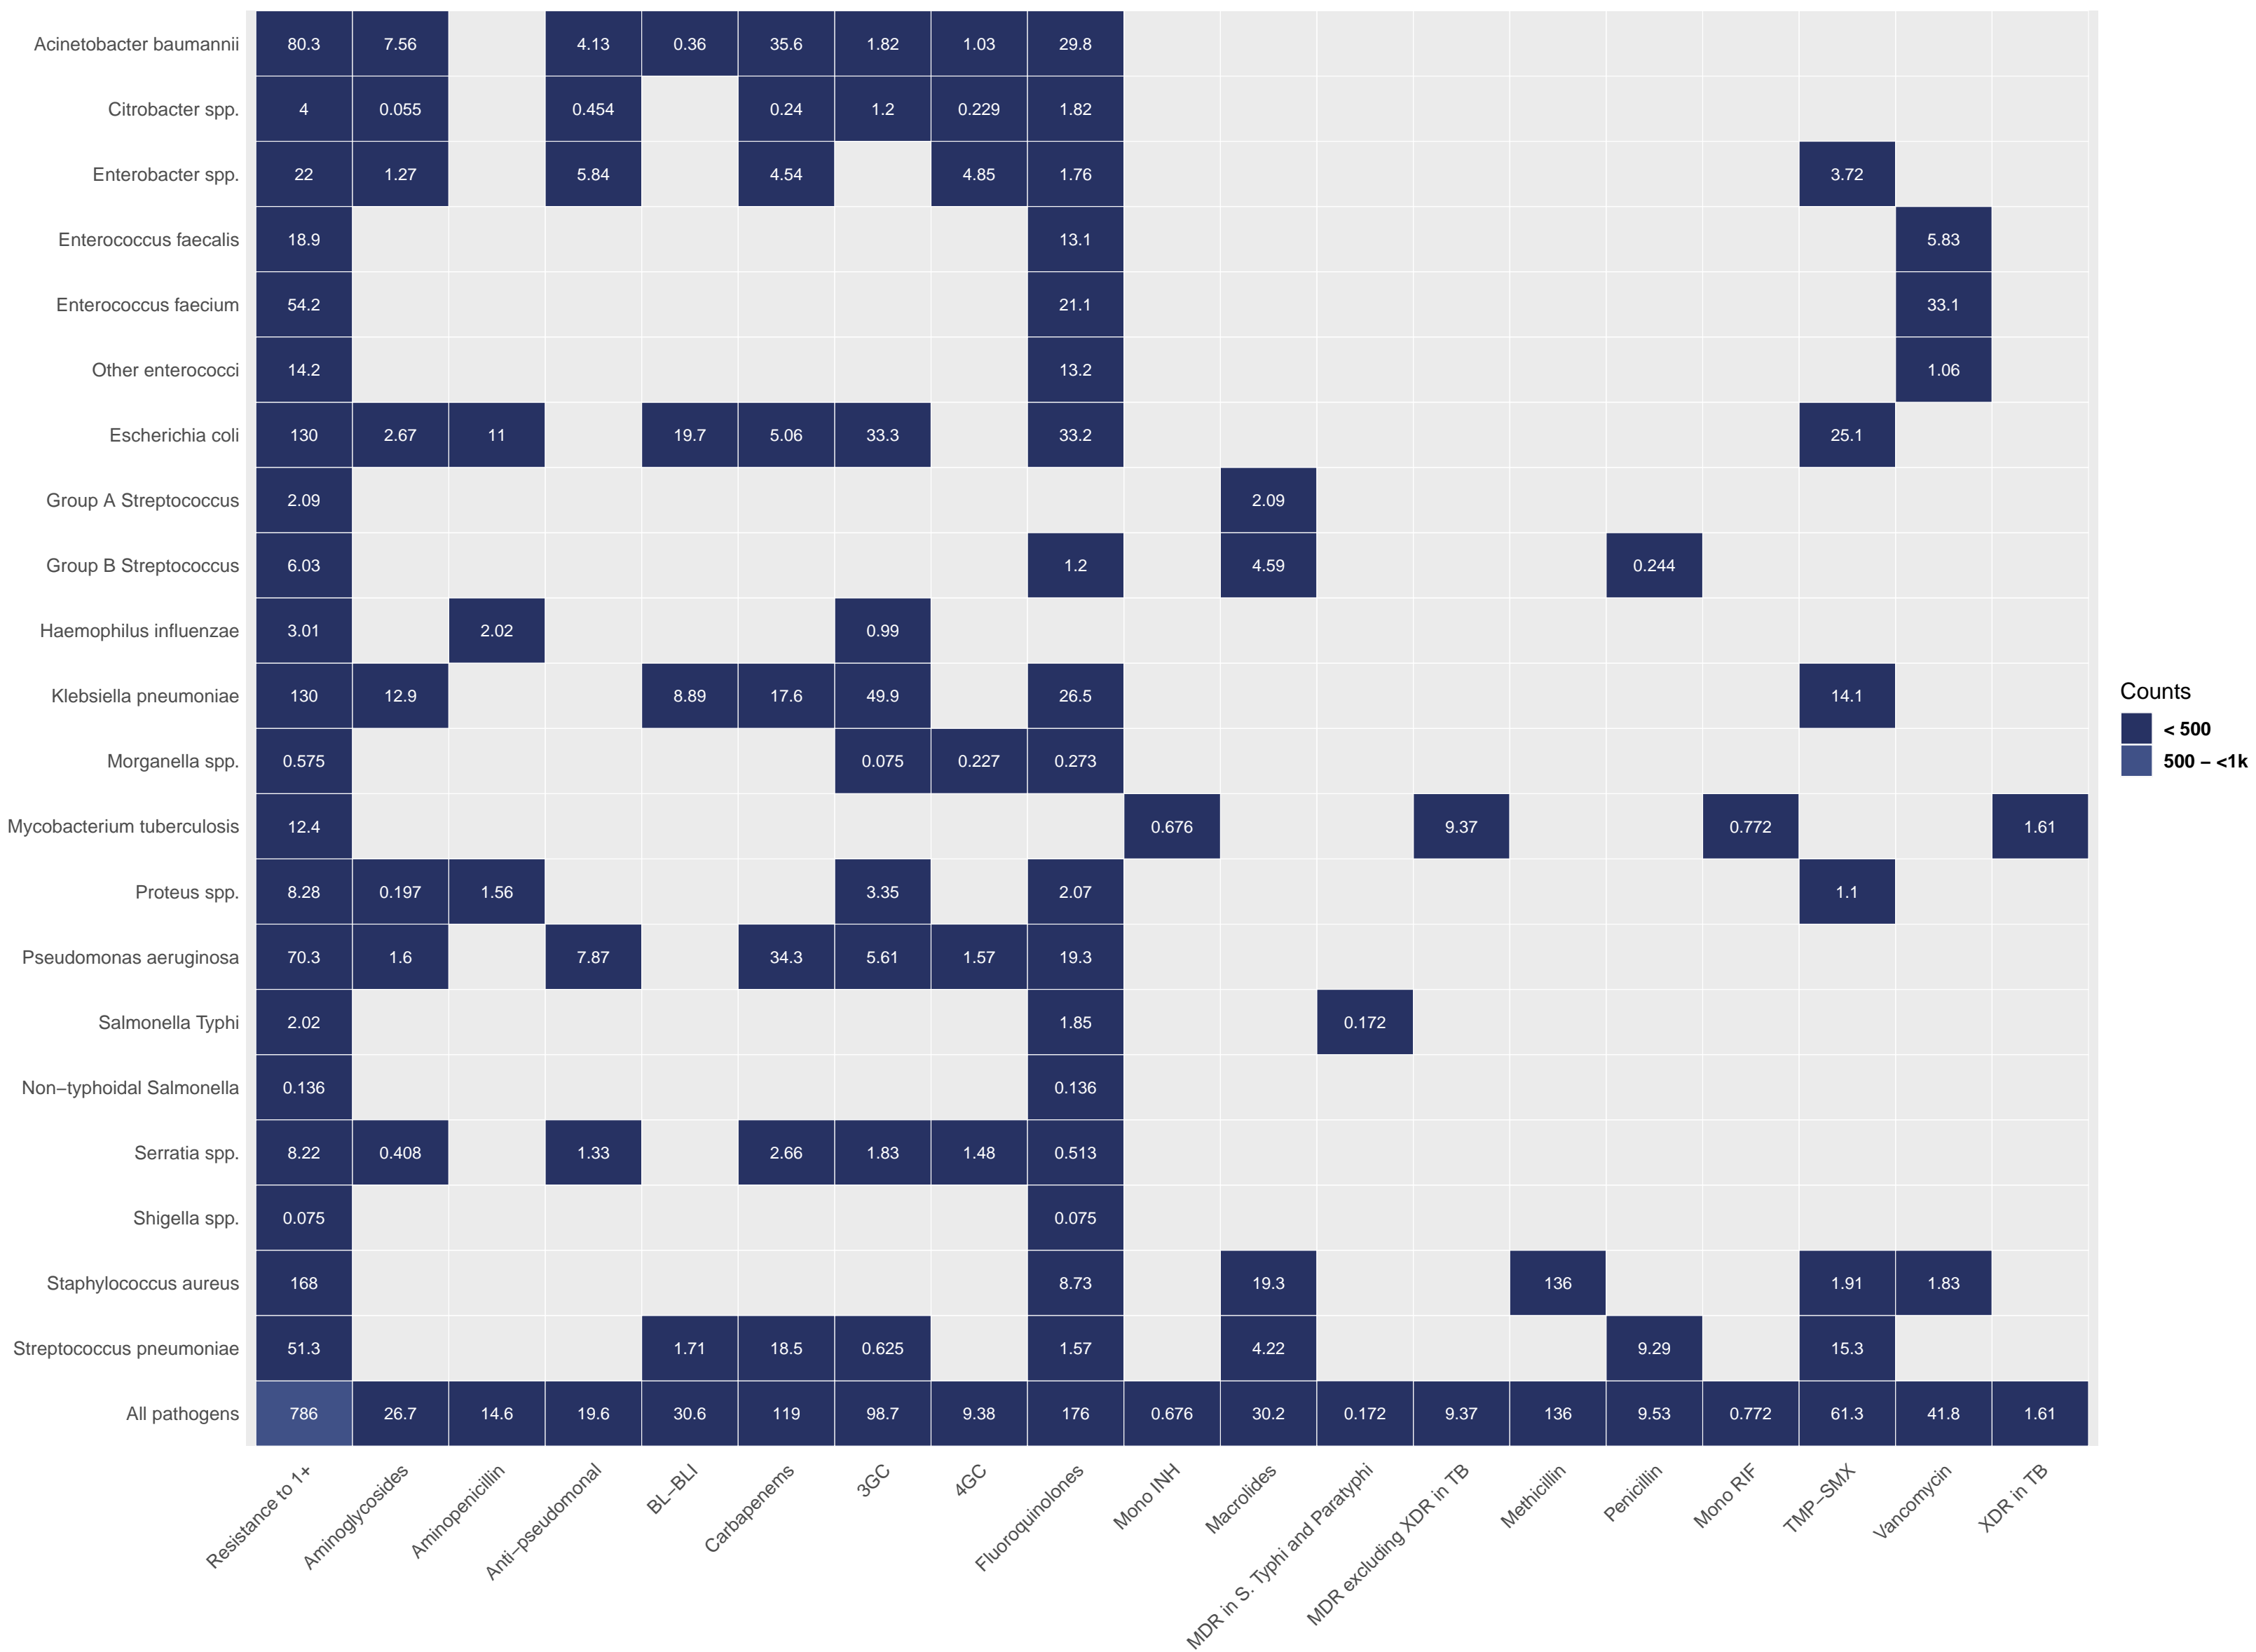

Counts  
 < 500  
 500 – <1k

# Peru

Deaths (count) associated with bacterial antimicrobial resistance by pathogen–drug combinations, 2019

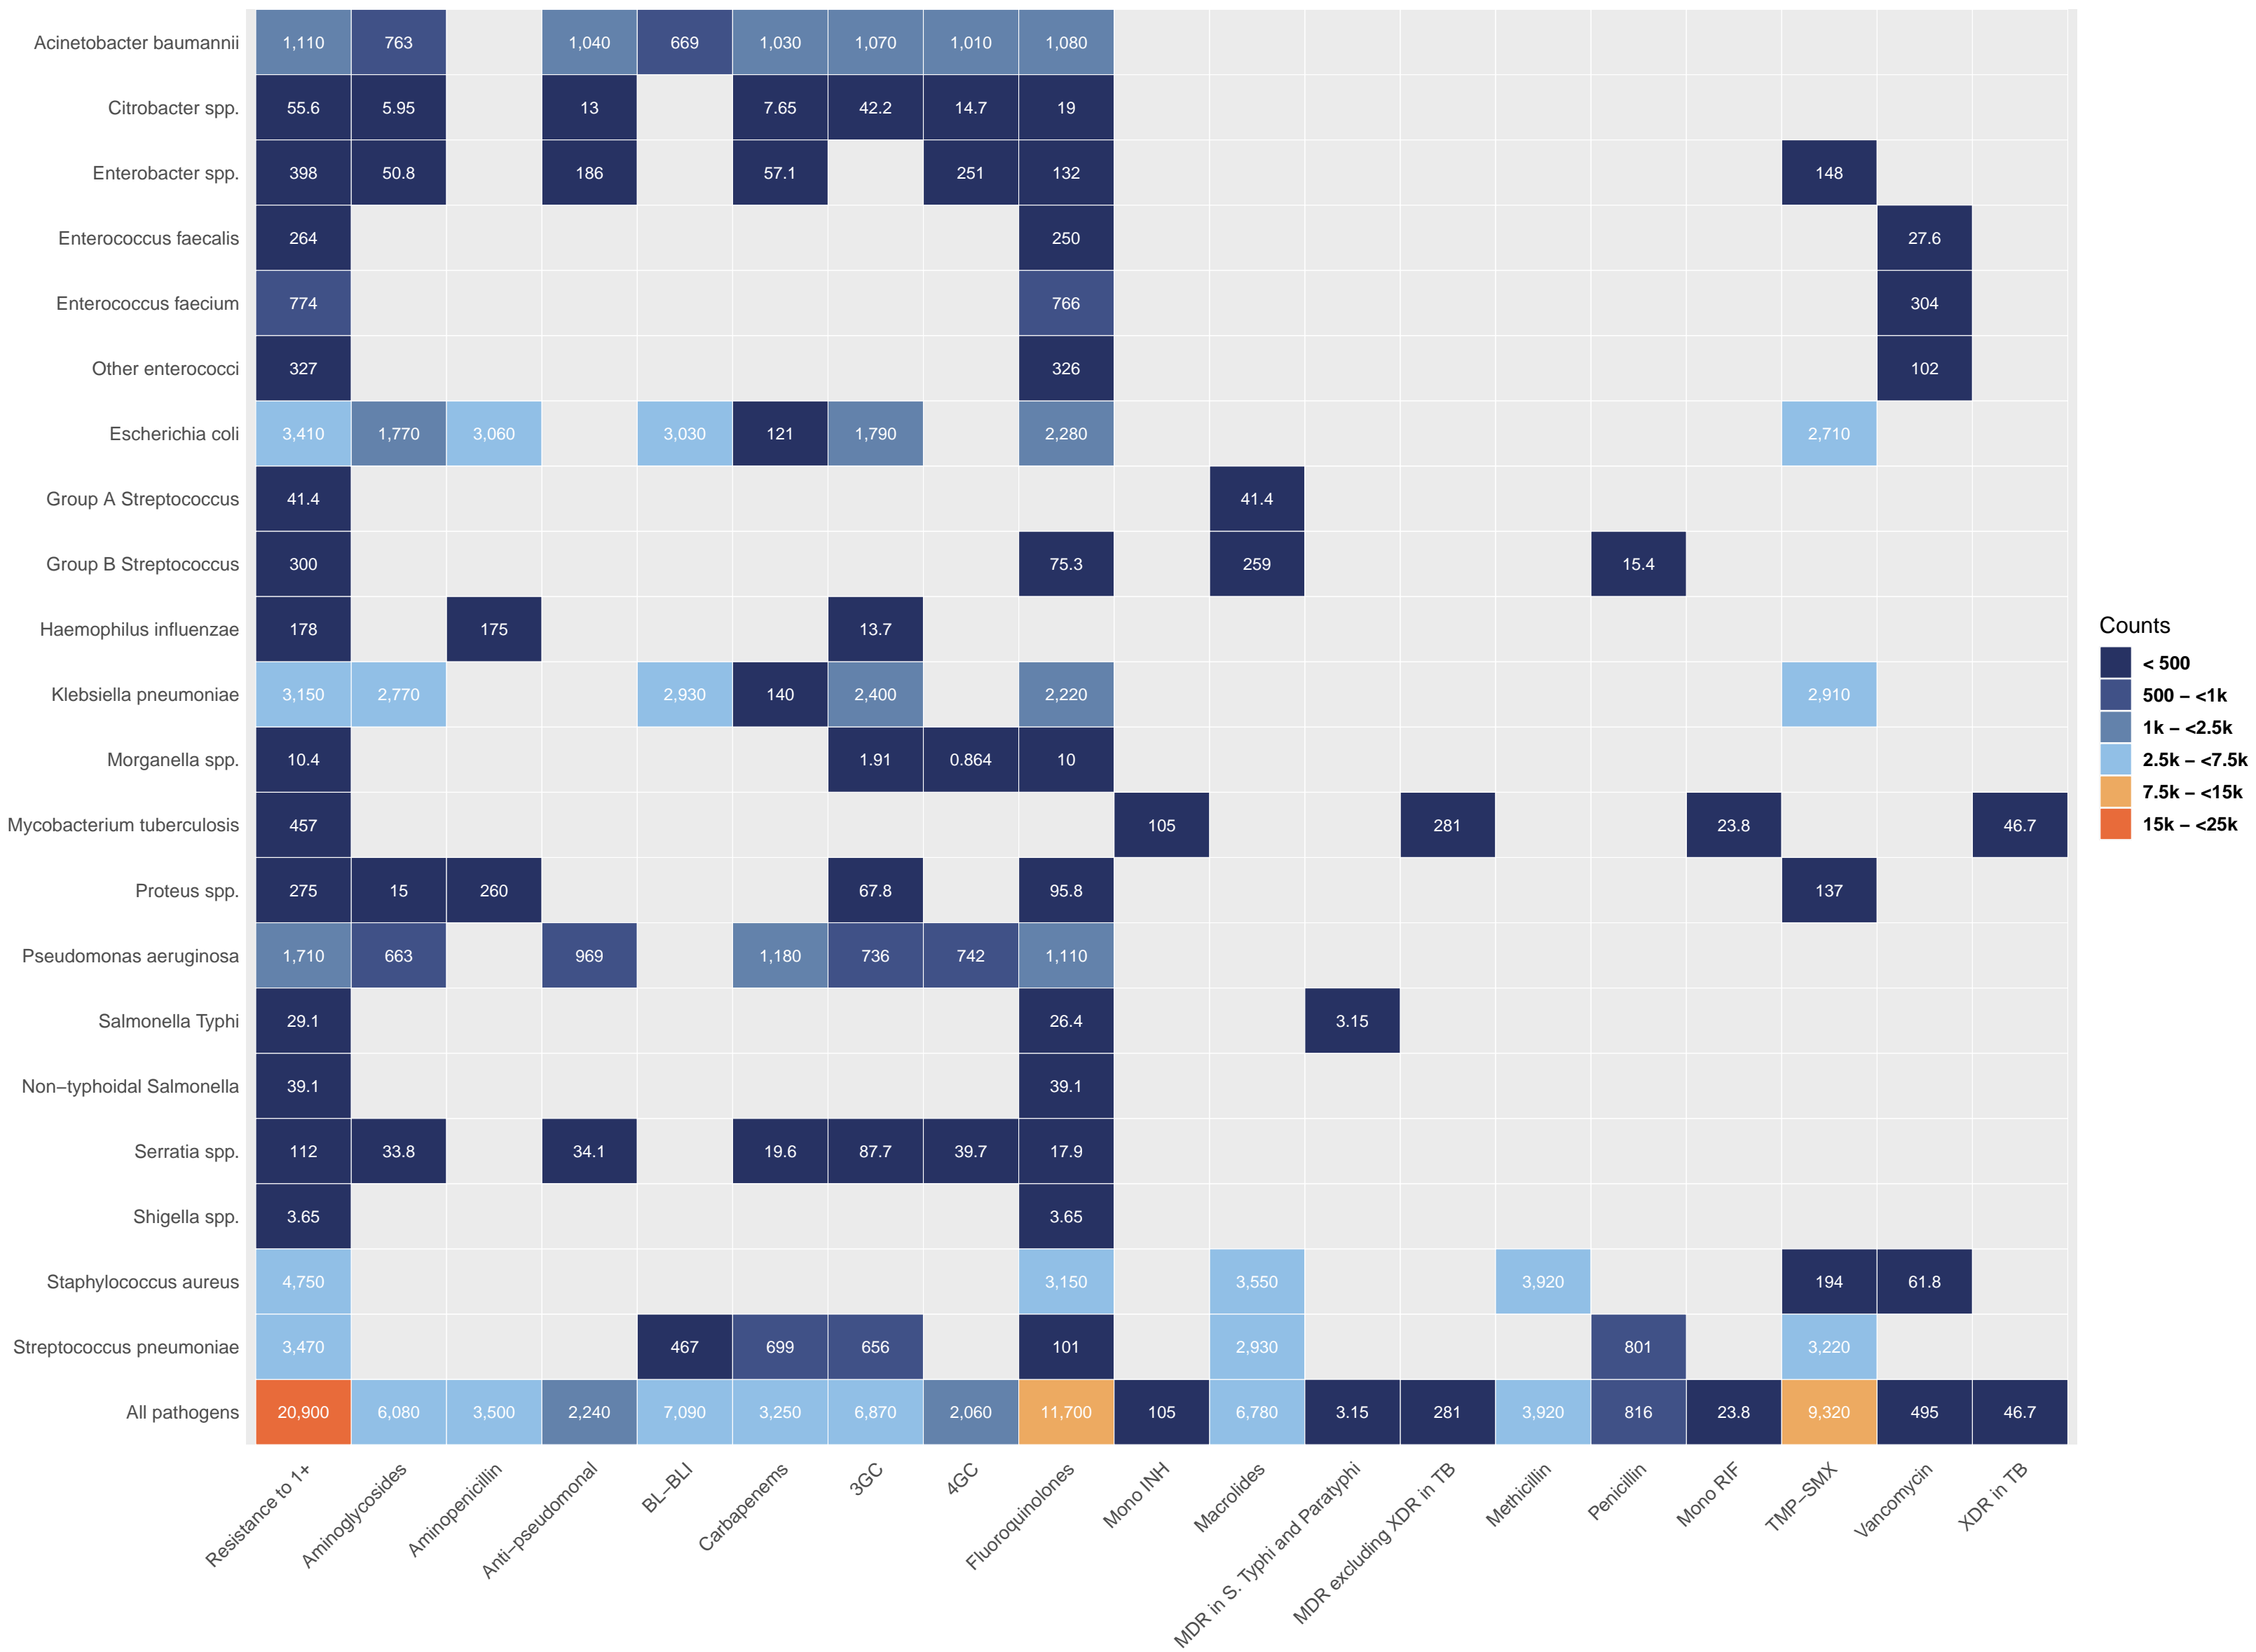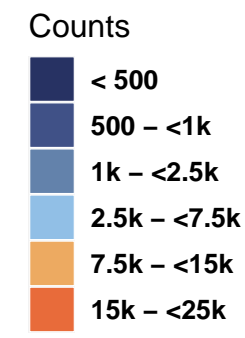



# Peru

Deaths (count) *attributable to* bacterial antimicrobial resistance by pathogen–drug combinations, 2019

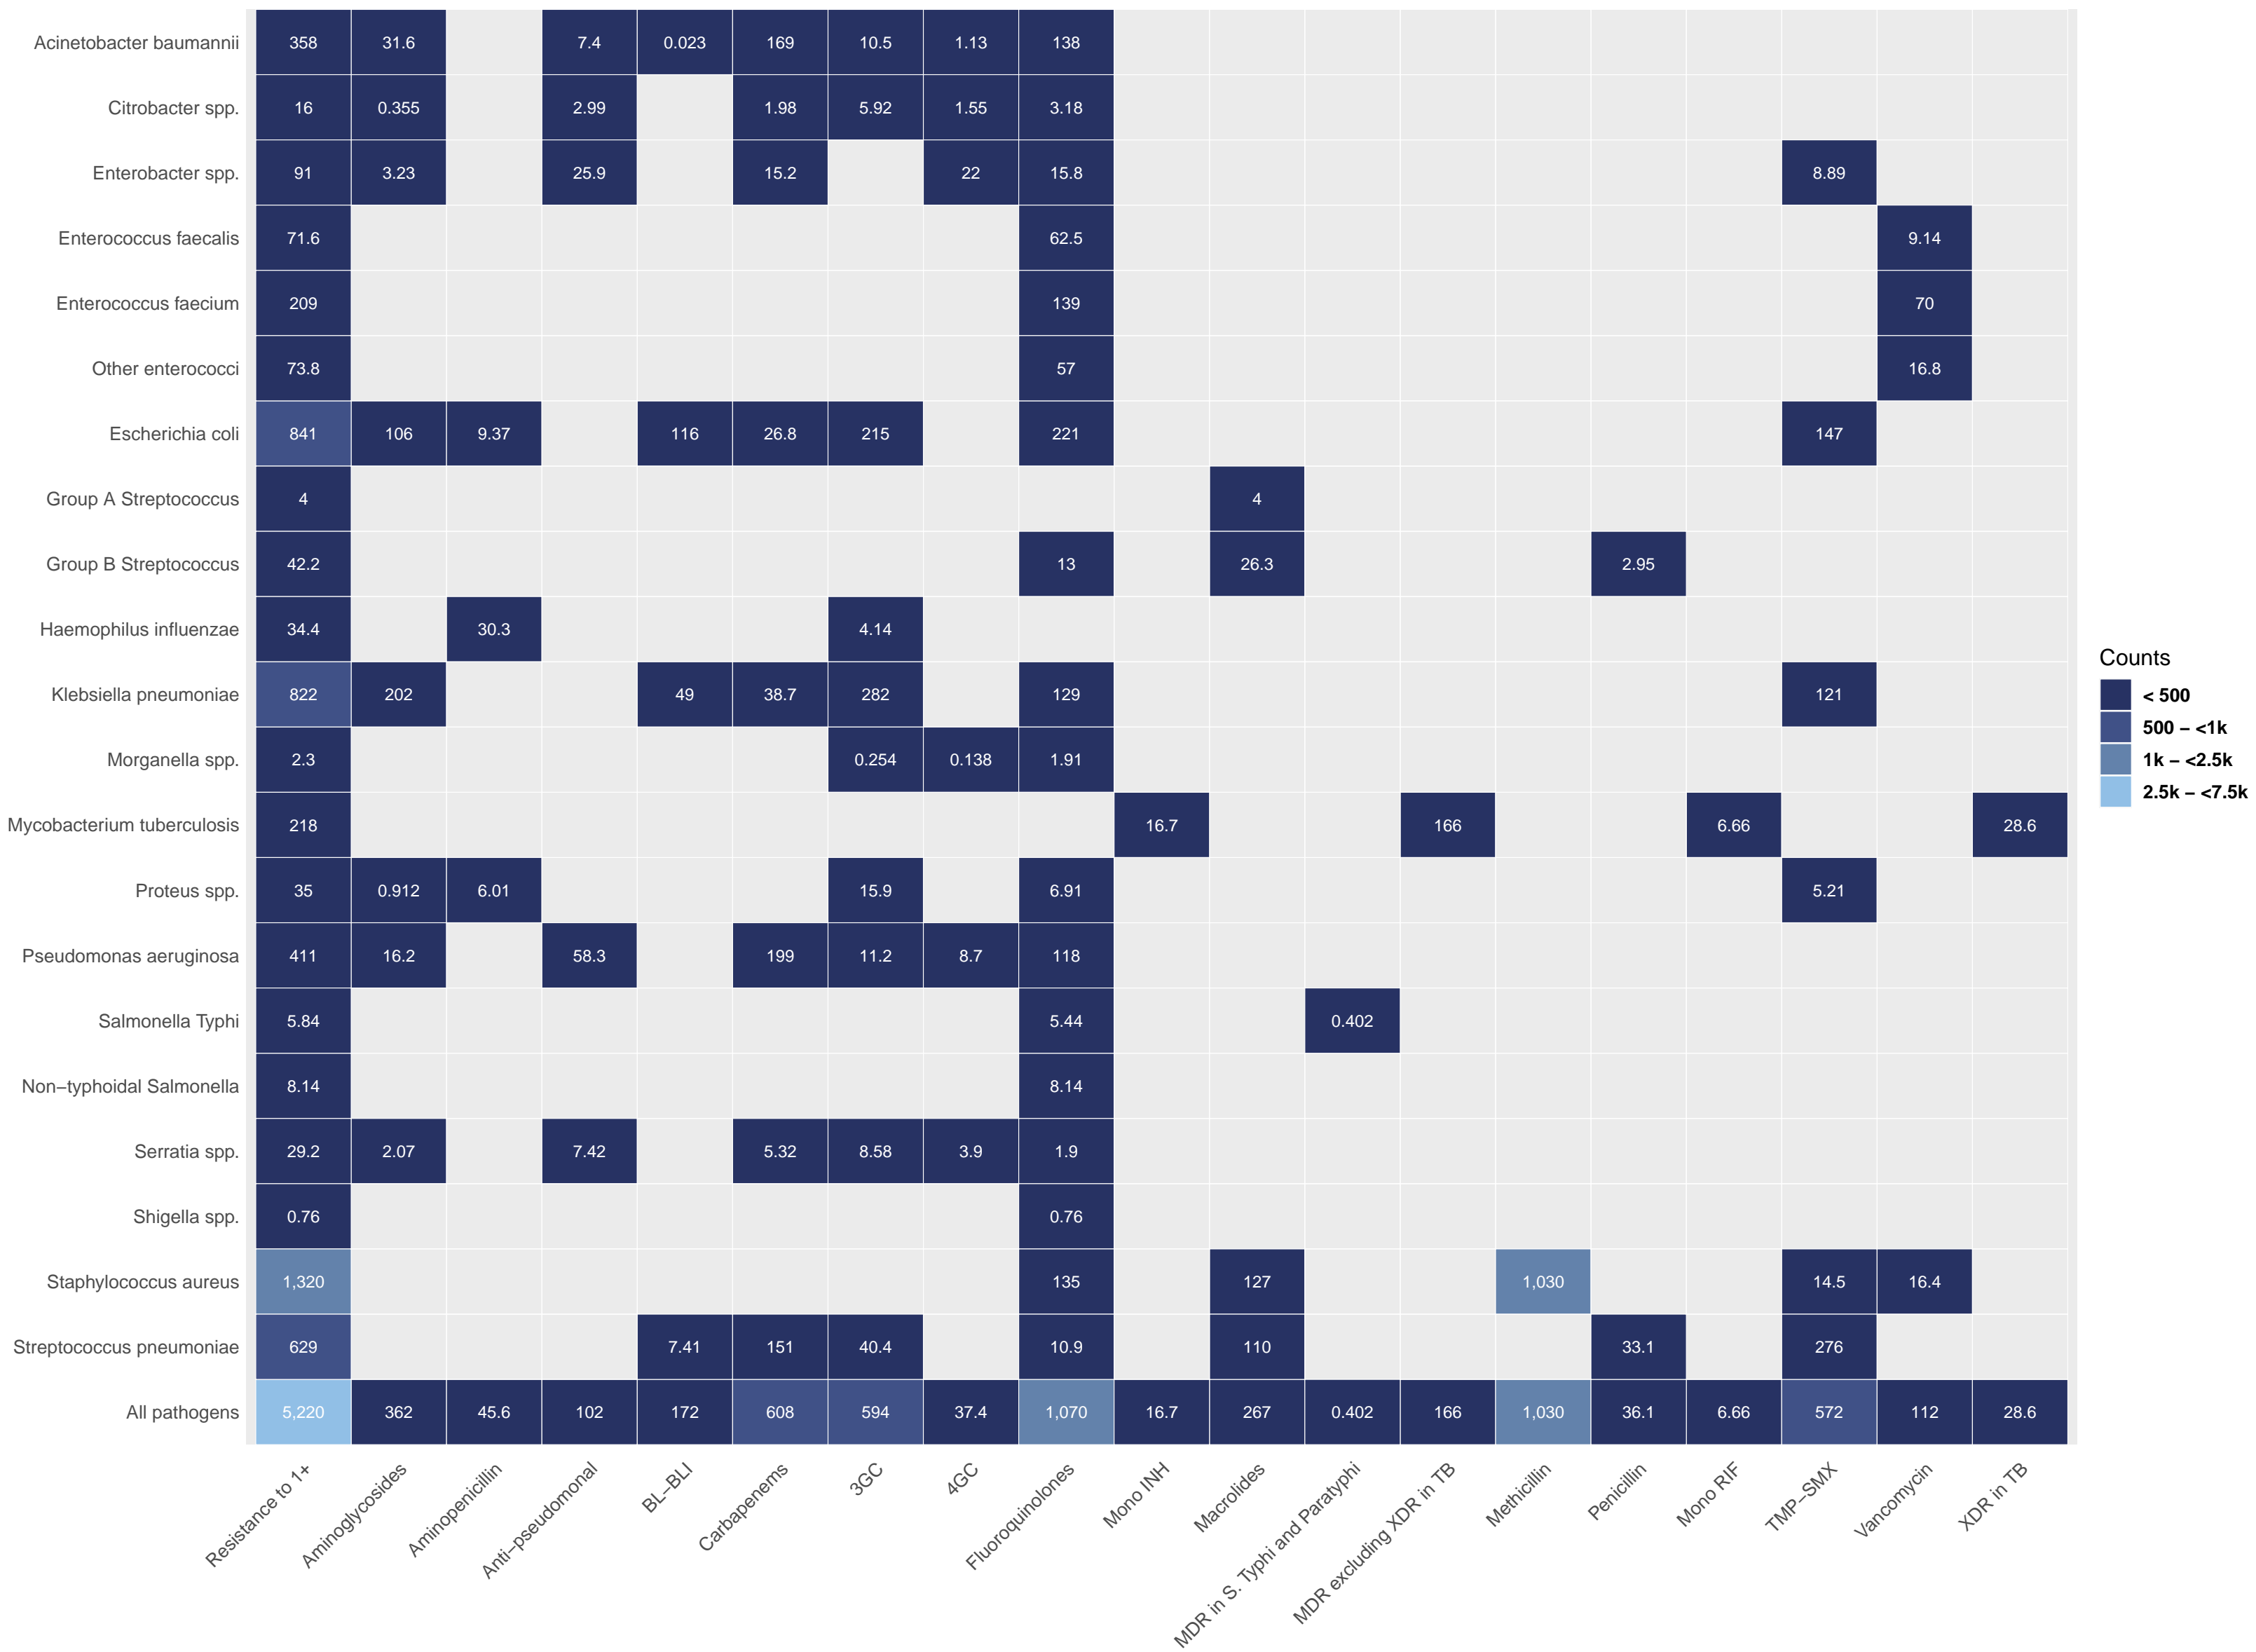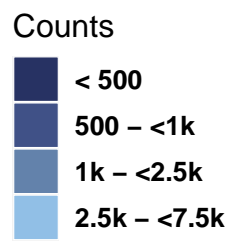

# Saint Kitts and Nevis

Deaths (count) associated with bacterial antimicrobial resistance by pathogen–drug combinations, 2019

|                            |                  |                 |                 |                  |        |             |       |       |                  |          |            |                               |                         |             |            |          |         |            |           |
|----------------------------|------------------|-----------------|-----------------|------------------|--------|-------------|-------|-------|------------------|----------|------------|-------------------------------|-------------------------|-------------|------------|----------|---------|------------|-----------|
| Acinetobacter baumannii    | 6.79             | 4.79            |                 | 5.94             | 5.52   | 6.07        | 6.47  | 6.39  | 6.67             |          |            |                               |                         |             |            |          |         |            |           |
| Citrobacter spp.           | 0.266            | 0.023           |                 | 0.05             |        | 0.062       | 0.182 | 0.076 | 0.103            |          |            |                               |                         |             |            |          |         |            |           |
| Enterobacter spp.          | 1.93             | 0.283           |                 | 0.656            |        | 0.467       |       | 0.825 | 0.926            |          |            |                               |                         |             |            |          | 1.12    |            |           |
| Enterococcus faecalis      | 0.747            |                 |                 |                  |        |             |       |       | 0.68             |          |            |                               |                         |             |            |          |         | 0.128      |           |
| Enterococcus faecium       | 1.86             |                 |                 |                  |        |             |       |       | 1.84             |          |            |                               |                         |             |            |          |         | 0.587      |           |
| Other enterococci          | 1.13             |                 |                 |                  |        |             |       |       | 1.13             |          |            |                               |                         |             |            |          |         | 0.244      |           |
| Escherichia coli           | 6.61             | 0.585           | 6.17            |                  | 4.76   | 0.375       | 3.59  |       | 4.37             |          |            |                               |                         |             |            |          | 4.28    |            |           |
| Group A Streptococcus      | 0.436            |                 |                 |                  |        |             |       |       |                  |          | 0.436      |                               |                         |             |            |          |         |            |           |
| Group B Streptococcus      | 0.467            |                 |                 |                  |        |             |       |       | 0.067            |          | 0.433      |                               |                         | 0.015       |            |          |         |            |           |
| Haemophilus influenzae     | 0.097            |                 | 0.082           |                  |        |             | 0.027 |       |                  |          |            |                               |                         |             |            |          |         |            |           |
| Klebsiella pneumoniae      | 4.07             | 0.916           |                 |                  | 3.26   | 0.457       | 2.79  |       | 2.4              |          |            |                               |                         |             |            |          | 2.94    |            |           |
| Morganella spp.            | 0.029            |                 |                 |                  |        |             | 0.007 | 0.004 | 0.027            |          |            |                               |                         |             |            |          |         |            |           |
| Mycobacterium tuberculosis | 0.02             |                 |                 |                  |        |             |       |       |                  | 0.005    |            |                               | 0.011                   |             |            | 0.002    |         |            | 0.002     |
| Proteus spp.               | 0.822            | 0.027           | 0.743           |                  |        |             | 0.139 |       | 0.416            |          |            |                               |                         |             |            |          | 0.449   |            |           |
| Pseudomonas aeruginosa     | 3.3              | 0.978           |                 | 1.65             |        | 2.53        | 1.53  | 1.21  | 1.84             |          |            |                               |                         |             |            |          |         |            |           |
| Salmonella Typhi           | 0.032            |                 |                 |                  |        |             |       |       | 0.026            |          |            | 0.007                         |                         |             |            |          |         |            |           |
| Non-typhoidal Salmonella   | 0.009            |                 |                 |                  |        |             |       |       | 0.009            |          |            |                               |                         |             |            |          |         |            |           |
| Serratia spp.              | 0.322            | 0.078           |                 | 0.067            |        | 0.064       | 0.242 | 0.136 | 0.063            |          |            |                               |                         |             |            |          |         |            |           |
| Shigella spp.              | 0.004            |                 |                 |                  |        |             |       |       | 0.004            |          |            |                               |                         |             |            |          |         |            |           |
| Staphylococcus aureus      | 5.77             |                 |                 |                  |        |             |       |       | 1.5              |          | 3.87       |                               | 5.06                    |             |            |          | 0.26    | 0.109      |           |
| Streptococcus pneumoniae   | 3.94             |                 |                 |                  | 0.769  | 1.66        | 0.832 |       | 0.138            |          | 2.98       |                               |                         | 1.42        |            |          | 2.54    |            |           |
| All pathogens              | 38.7             | 7.69            | 7               | 8.37             | 14.3   | 11.7        | 15.8  | 8.64  | 22.2             | 0.005    | 7.72       | 0.007                         | 0.011                   | 5.06        | 1.43       | 0.002    | 11.6    | 1.07       | 0.002     |
|                            | Resistance to 1+ | Aminoglycosides | Aminopenicillin | Anti-pseudomonal | BL-BLI | Carbapenems | 3GC   | 4GC   | Fluoroquinolones | Mono INH | Macrolides | MDR in S. Typhi and Paratyphi | MDR excluding XDR in TB | Methicillin | Penicillin | Mono RIF | TMP-SMX | Vancomycin | XDR in TB |

Counts

< 500

# Saint Kitts and Nevis

Deaths (count) *attributable to* bacterial antimicrobial resistance by pathogen–drug combinations, 2019

|                            |                  |                 |                 |                  |        |             |        |        |                  |          |            |                               |                         |             |            |          |         |            |           |
|----------------------------|------------------|-----------------|-----------------|------------------|--------|-------------|--------|--------|------------------|----------|------------|-------------------------------|-------------------------|-------------|------------|----------|---------|------------|-----------|
| Acinetobacter baumannii    | 2.18             | 0.199           |                 | 0.044            | 0.002  | 0.992       | 0.055  | 0.032  | 0.854            |          |            |                               |                         |             |            |          |         |            |           |
| Citrobacter spp.           | 0.077            | 0.001           |                 | 0.01             |        | 0.016       | 0.024  | 0.007  | 0.018            |          |            |                               |                         |             |            |          |         |            |           |
| Enterobacter spp.          | 0.438            | 0.018           |                 | 0.068            |        | 0.116       |        | 0.046  | 0.119            |          |            |                               |                         |             |            | 0.072    |         |            |           |
| Enterococcus faecalis      | 0.209            |                 |                 |                  |        |             |        |        | 0.167            |          |            |                               |                         |             |            |          |         | 0.042      |           |
| Enterococcus faecium       | 0.483            |                 |                 |                  |        |             |        |        | 0.346            |          |            |                               |                         |             |            |          |         | 0.137      |           |
| Other enterococci          | 0.248            |                 |                 |                  |        |             |        |        | 0.207            |          |            |                               |                         |             |            |          |         | 0.041      |           |
| Escherichia coli           | 1.66             | 0.037           | 0.092           |                  | 0.214  | 0.082       | 0.502  |        | 0.488            |          |            |                               |                         |             |            |          | 0.246   |            |           |
| Group A Streptococcus      | 0.042            |                 |                 |                  |        |             |        |        |                  |          | 0.042      |                               |                         |             |            |          |         |            |           |
| Group B Streptococcus      | 0.06             |                 |                 |                  |        |             |        |        | 0.011            |          | 0.045      |                               |                         | 0.003       |            |          |         |            |           |
| Haemophilus influenzae     | 0.021            |                 | 0.013           |                  |        |             | 0.008  |        |                  |          |            |                               |                         |             |            |          |         |            |           |
| Klebsiella pneumoniae      | 1.04             | 0.079           |                 |                  | 0.099  | 0.121       | 0.398  |        | 0.178            |          |            |                               |                         |             |            |          | 0.163   |            |           |
| Morganella spp.            | 0.007            |                 |                 |                  |        |             | 0.0009 | 0.0007 | 0.005            |          |            |                               |                         |             |            |          |         |            |           |
| Mycobacterium tuberculosis | 0.009            |                 |                 |                  |        |             |        |        |                  | 0.0007   |            |                               | 0.007                   |             |            | 0.0007   |         |            | 0.001     |
| Proteus spp.               | 0.1              | 0.002           | 0.018           |                  |        |             | 0.032  |        | 0.032            |          |            |                               |                         |             |            |          | 0.017   |            |           |
| Pseudomonas aeruginosa     | 0.805            | 0.024           |                 | 0.078            |        | 0.457       | 0.042  | 0.011  | 0.193            |          |            |                               |                         |             |            |          |         |            |           |
| Salmonella Typhi           | 0.006            |                 |                 |                  |        |             |        |        | 0.005            |          |            | 0.0009                        |                         |             |            |          |         |            |           |
| Non-typhoidal Salmonella   | 0.002            |                 |                 |                  |        |             |        |        | 0.002            |          |            |                               |                         |             |            |          |         |            |           |
| Serratia spp.              | 0.085            | 0.005           |                 | 0.015            |        | 0.018       | 0.025  | 0.015  | 0.007            |          |            |                               |                         |             |            |          |         |            |           |
| Shigella spp.              | 0.0007           |                 |                 |                  |        |             |        |        | 0.0007           |          |            |                               |                         |             |            |          |         |            |           |
| Staphylococcus aureus      | 1.69             |                 |                 |                  |        |             |        |        | 0.072            |          | 0.148      |                               | 1.42                    |             |            |          | 0.021   | 0.027      |           |
| Streptococcus pneumoniae   | 0.809            |                 |                 |                  | 0.008  | 0.373       | 0.014  |        | 0.015            |          | 0.128      |                               |                         | 0.056       |            |          | 0.215   |            |           |
| All pathogens              | 9.97             | 0.364           | 0.123           | 0.216            | 0.323  | 2.18        | 1.1    | 0.112  | 2.72             | 0.0007   | 0.363      | 0.0009                        | 0.007                   | 1.42        | 0.059      | 0.0007   | 0.733   | 0.247      | 0.001     |
|                            | Resistance to 1+ | Aminoglycosides | Aminopenicillin | Anti-pseudomonal | BL-BLI | Carbapenems | 3GC    | 4GC    | Fluoroquinolones | Mono INH | Macrolides | MDR in S. Typhi and Paratyphi | MDR excluding XDR in TB | Methicillin | Penicillin | Mono RIF | TMP-SMX | Vancomycin | XDR in TB |

Counts  
 < 500

# Saint Lucia

Deaths (count) associated with bacterial antimicrobial resistance by pathogen–drug combinations, 2019

|                            |                  |                 |                 |                  |        |             |       |       |                  |          |            |                               |                         |             |            |          |         |            |           |
|----------------------------|------------------|-----------------|-----------------|------------------|--------|-------------|-------|-------|------------------|----------|------------|-------------------------------|-------------------------|-------------|------------|----------|---------|------------|-----------|
| Acinetobacter baumannii    | 20.7             | 13.5            |                 | 17.9             | 17.5   | 17.2        | 18.7  | 18.2  | 18.1             |          |            |                               |                         |             |            |          |         |            |           |
| Citrobacter spp.           | 0.808            | 0.066           |                 | 0.202            |        | 0.142       | 0.559 | 0.327 | 0.296            |          |            |                               |                         |             |            |          |         |            |           |
| Enterobacter spp.          | 5.82             | 0.883           |                 | 2.14             |        | 1.17        |       | 3.08  | 2.34             |          |            |                               |                         |             |            |          | 3.53    |            |           |
| Enterococcus faecalis      | 2.28             |                 |                 |                  |        |             |       |       | 2.09             |          |            |                               |                         |             |            |          |         | 0.397      |           |
| Enterococcus faecium       | 4.79             |                 |                 |                  |        |             |       |       | 4.75             |          |            |                               |                         |             |            |          |         | 1.43       |           |
| Other enterococci          | 3.81             |                 |                 |                  |        |             |       |       | 3.8              |          |            |                               |                         |             |            |          |         | 0.879      |           |
| Escherichia coli           | 18.1             | 2.13            | 16.8            |                  | 14.3   | 1.09        | 10.7  |       | 12               |          |            |                               |                         |             |            |          | 11.7    |            |           |
| Group A Streptococcus      | 1.35             |                 |                 |                  |        |             |       |       |                  |          | 1.35       |                               |                         |             |            |          |         |            |           |
| Group B Streptococcus      | 1.74             |                 |                 |                  |        |             |       |       | 0.328            |          | 1.56       |                               |                         | 0.123       |            |          |         |            |           |
| Haemophilus influenzae     | 0.254            |                 | 0.197           |                  |        |             | 0.091 |       |                  |          |            |                               |                         |             |            |          |         |            |           |
| Klebsiella pneumoniae      | 12.9             | 3.57            |                 |                  | 10.5   | 1.06        | 9.55  |       | 6.7              |          |            |                               |                         |             |            |          | 9.63    |            |           |
| Morganella spp.            | 0.1              |                 |                 |                  |        |             | 0.022 | 0.014 | 0.094            |          |            |                               |                         |             |            |          |         |            |           |
| Mycobacterium tuberculosis | 0.072            |                 |                 |                  |        |             |       |       |                  | 0.018    |            |                               | 0.042                   |             |            | 0.005    |         |            | 0.007     |
| Proteus spp.               | 2.29             | 0.098           | 2.08            |                  |        |             | 0.413 |       | 0.65             |          |            |                               |                         |             |            |          | 1.38    |            |           |
| Pseudomonas aeruginosa     | 8.34             | 2.26            |                 | 3.93             |        | 5.69        | 4.61  | 3.5   | 3.99             |          |            |                               |                         |             |            |          |         |            |           |
| Salmonella Typhi           | 0.108            |                 |                 |                  |        |             |       |       | 0.091            |          |            | 0.019                         |                         |             |            |          |         |            |           |
| Non-typhoidal Salmonella   | 0.012            |                 |                 |                  |        |             |       |       | 0.012            |          |            |                               |                         |             |            |          |         |            |           |
| Serratia spp.              | 0.994            | 0.22            |                 | 0.221            |        | 0.245       | 0.669 | 0.328 | 0.363            |          |            |                               |                         |             |            |          |         |            |           |
| Shigella spp.              | 0.002            |                 |                 |                  |        |             |       |       | 0.002            |          |            |                               |                         |             |            |          |         |            |           |
| Staphylococcus aureus      | 15.8             |                 |                 |                  |        |             |       |       | 5.54             |          | 8.55       |                               |                         | 15          |            |          | 1.12    | 0.496      |           |
| Streptococcus pneumoniae   | 10.8             |                 |                 |                  | 2.53   | 3.18        | 2     |       | 0.487            |          | 6.97       |                               |                         | 5.38        |            |          | 7.29    |            |           |
| All pathogens              | 111              | 22.7            | 19              | 24.4             | 44.8   | 29.8        | 47.3  | 25.4  | 61.6             | 0.018    | 18.4       | 0.019                         | 0.042                   | 15          | 5.51       | 0.005    | 34.7    | 3.21       | 0.007     |
|                            | Resistance to 1+ | Aminoglycosides | Aminopenicillin | Anti-pseudomonal | BL-BLI | Carbapenems | 3GC   | 4GC   | Fluoroquinolones | Mono INH | Macrolides | MDR in S. Typhi and Paratyphi | MDR excluding XDR in TB | Methicillin | Penicillin | Mono RIF | TMP-SMX | Vancomycin | XDR in TB |

Counts

< 500

# Saint Lucia

Deaths (count) *attributable to* bacterial antimicrobial resistance by pathogen–drug combinations, 2019

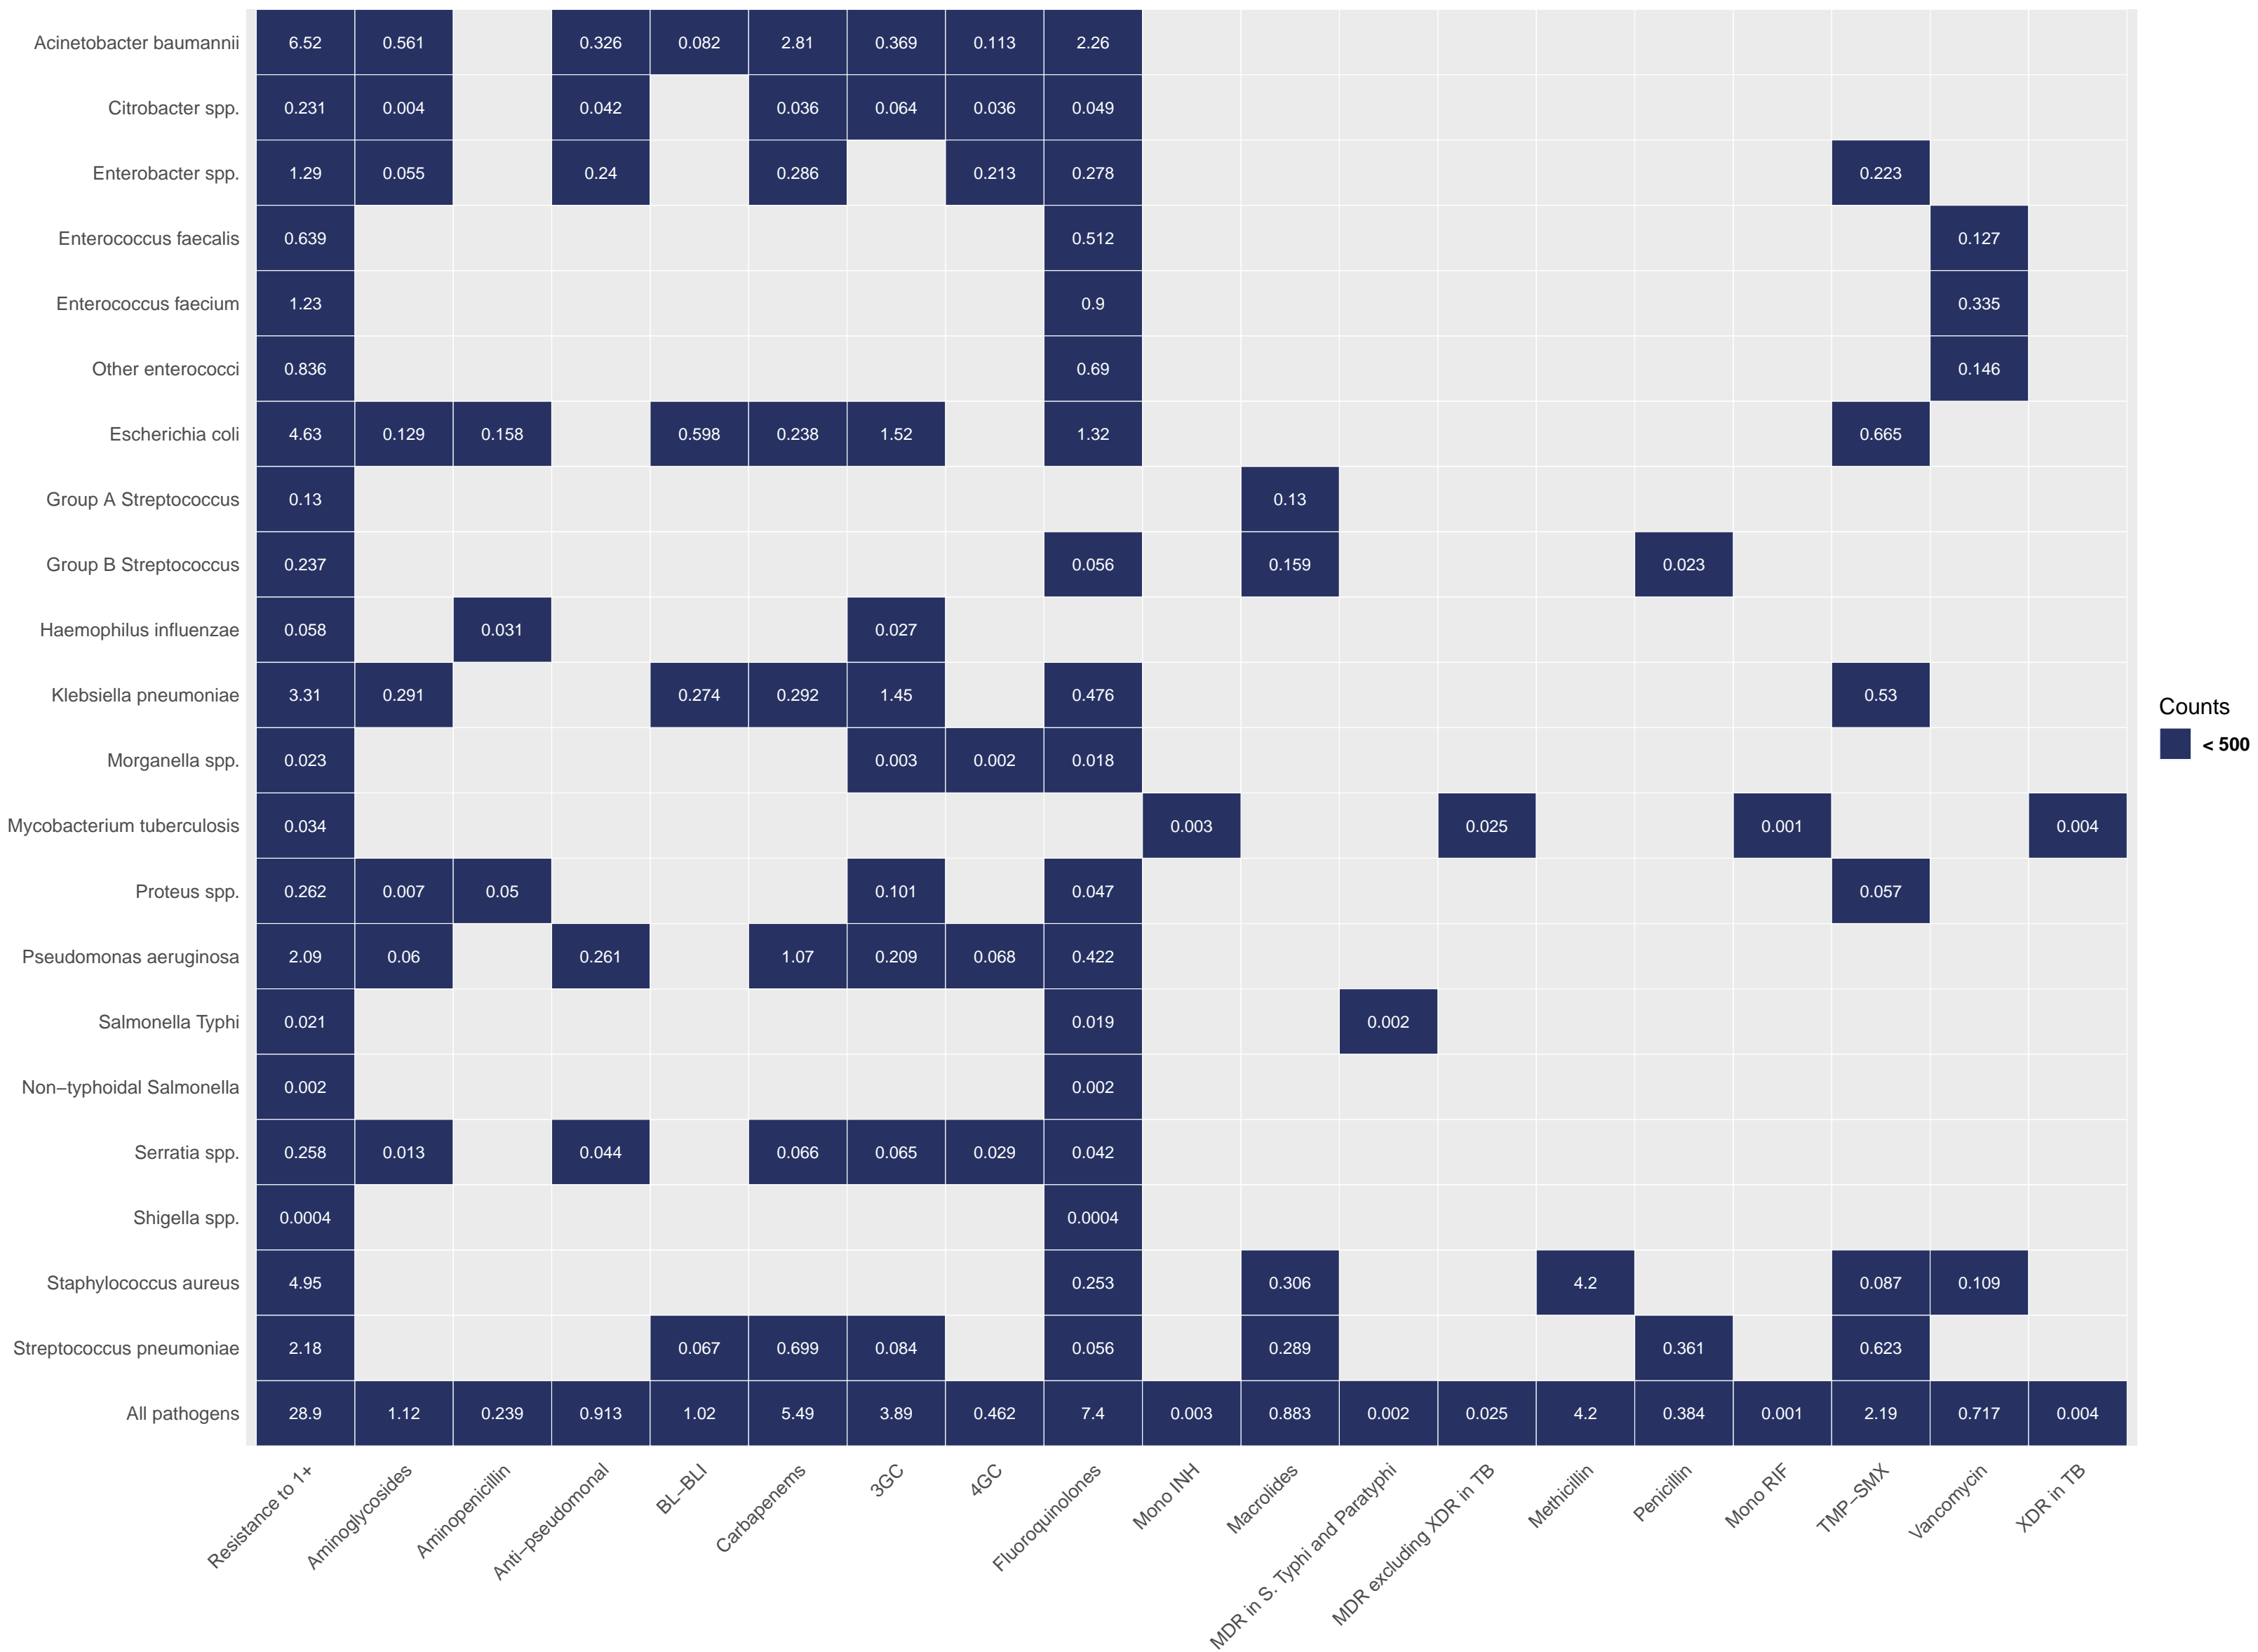

Counts  
 < 500

# Saint Vincent and the Grenadines

Deaths (count) associated with bacterial antimicrobial resistance by pathogen–drug combinations, 2019

|                            |                  |                 |                 |                  |        |             |       |       |                  |          |            |                               |                         |             |            |          |         |            |           |
|----------------------------|------------------|-----------------|-----------------|------------------|--------|-------------|-------|-------|------------------|----------|------------|-------------------------------|-------------------------|-------------|------------|----------|---------|------------|-----------|
| Acinetobacter baumannii    | 14.8             | 9.47            |                 | 13.4             | 11.2   | 11.6        | 12.2  | 12.8  | 13               |          |            |                               |                         |             |            |          |         |            |           |
| Citrobacter spp.           | 0.691            | 0.066           |                 | 0.169            |        | 0.115       | 0.463 | 0.332 | 0.272            |          |            |                               |                         |             |            |          |         |            |           |
| Enterobacter spp.          | 4.57             | 0.798           |                 | 1.35             |        | 0.979       |       | 2.47  | 2.4              |          |            |                               |                         |             |            |          | 3.01    |            |           |
| Enterococcus faecalis      | 1.74             |                 |                 |                  |        |             |       |       | 1.63             |          |            |                               |                         |             |            |          |         | 0.261      |           |
| Enterococcus faecium       | 3.12             |                 |                 |                  |        |             |       |       | 3.09             |          |            |                               |                         |             |            |          |         | 0.965      |           |
| Other enterococci          | 2.61             |                 |                 |                  |        |             |       |       | 2.61             |          |            |                               |                         |             |            |          |         | 0.136      |           |
| Escherichia coli           | 12.4             | 2.84            | 11.9            |                  | 9.41   | 1.28        | 6.52  |       | 7.67             |          |            |                               |                         |             |            |          | 7.97    |            |           |
| Group A Streptococcus      | 0.964            |                 |                 |                  |        |             |       |       |                  |          | 0.964      |                               |                         |             |            |          |         |            |           |
| Group B Streptococcus      | 1.25             |                 |                 |                  |        |             |       |       | 0.378            |          | 1.03       |                               |                         | 0.078       |            |          |         |            |           |
| Haemophilus influenzae     | 0.14             |                 | 0.085           |                  |        |             | 0.074 |       |                  |          |            |                               |                         |             |            |          |         |            |           |
| Klebsiella pneumoniae      | 9.83             | 3.67            |                 |                  | 8.26   | 0.834       | 7.33  |       | 6.39             |          |            |                               |                         |             |            |          | 7.47    |            |           |
| Morganella spp.            | 0.081            |                 |                 |                  |        |             | 0.016 | 0.016 | 0.075            |          |            |                               |                         |             |            |          |         |            |           |
| Mycobacterium tuberculosis | 0.049            |                 |                 |                  |        |             |       |       |                  | 0.01     |            |                               | 0.031                   |             |            | 0.003    |         |            | 0.005     |
| Proteus spp.               | 1.7              | 0.067           | 1.56            |                  |        |             | 0.319 |       | 0.669            |          |            |                               |                         |             |            |          | 0.977   |            |           |
| Pseudomonas aeruginosa     | 5.9              | 2.61            |                 | 2.46             |        | 3.82        | 2.93  | 2.21  | 3.11             |          |            |                               |                         |             |            |          |         |            |           |
| Salmonella Typhi           | 0.136            |                 |                 |                  |        |             |       |       | 0.108            |          |            | 0.032                         |                         |             |            |          |         |            |           |
| Non-typhoidal Salmonella   | 0.015            |                 |                 |                  |        |             |       |       | 0.015            |          |            |                               |                         |             |            |          |         |            |           |
| Serratia spp.              | 0.759            | 0.251           |                 | 0.181            |        | 0.188       | 0.491 | 0.248 | 0.217            |          |            |                               |                         |             |            |          |         |            |           |
| Shigella spp.              | 0.003            |                 |                 |                  |        |             |       |       | 0.003            |          |            |                               |                         |             |            |          |         |            |           |
| Staphylococcus aureus      | 11.2             |                 |                 |                  |        |             |       |       | 3.87             |          | 7.22       |                               |                         | 10.1        |            |          | 1.6     | 0.22       |           |
| Streptococcus pneumoniae   | 7.74             |                 |                 |                  | 1.57   | 1.95        | 1.99  |       | 0.588            |          | 4.53       |                               |                         | 3.31        |            |          | 5.63    |            |           |
| All pathogens              | 79.7             | 19.8            | 13.5            | 17.6             | 30.4   | 20.8        | 32.4  | 18.1  | 46.1             | 0.01     | 13.7       | 0.032                         | 0.031                   | 10.1        | 3.38       | 0.003    | 26.7    | 1.58       | 0.005     |
|                            | Resistance to 1+ | Aminoglycosides | Aminopenicillin | Anti-pseudomonal | BL-BLI | Carbapenems | 3GC   | 4GC   | Fluoroquinolones | Mono INH | Macrolides | MDR in S. Typhi and Paratyphi | MDR excluding XDR in TB | Methicillin | Penicillin | Mono RIF | TMP-SMX | Vancomycin | XDR in TB |

Counts  
 < 500

# Saint Vincent and the Grenadines

Deaths (count) *attributable to* bacterial antimicrobial resistance by pathogen–drug combinations, 2019

|                            |                  |                 |                 |                  |        |             |       |       |                  |          |            |                               |                         |             |            |          |         |            |           |
|----------------------------|------------------|-----------------|-----------------|------------------|--------|-------------|-------|-------|------------------|----------|------------|-------------------------------|-------------------------|-------------|------------|----------|---------|------------|-----------|
| Acinetobacter baumannii    | 4.63             | 0.4             |                 | 0.42             | 0.032  | 1.88        | 0.194 | 0.055 | 1.65             |          |            |                               |                         |             |            |          |         |            |           |
| Citrobacter spp.           | 0.196            | 0.003           |                 | 0.034            |        | 0.028       | 0.048 | 0.039 | 0.044            |          |            |                               |                         |             |            |          |         |            |           |
| Enterobacter spp.          | 1.04             | 0.047           |                 | 0.125            |        | 0.221       |       | 0.169 | 0.294            |          |            |                               |                         |             |            |          | 0.181   |            |           |
| Enterococcus faecalis      | 0.481            |                 |                 |                  |        |             |       |       | 0.4              |          |            |                               |                         |             |            |          |         | 0.081      |           |
| Enterococcus faecium       | 0.807            |                 |                 |                  |        |             |       |       | 0.583            |          |            |                               |                         |             |            |          |         | 0.225      |           |
| Other enterococci          | 0.533            |                 |                 |                  |        |             |       |       | 0.508            |          |            |                               |                         |             |            |          |         | 0.025      |           |
| Escherichia coli           | 3.15             | 0.167           | 0.169           |                  | 0.432  | 0.275       | 0.848 |       | 0.806            |          |            |                               |                         |             |            |          | 0.449   |            |           |
| Group A Streptococcus      | 0.093            |                 |                 |                  |        |             |       |       |                  |          | 0.093      |                               |                         |             |            |          |         |            |           |
| Group B Streptococcus      | 0.183            |                 |                 |                  |        |             |       |       | 0.066            |          | 0.102      |                               |                         | 0.014       |            |          |         |            |           |
| Haemophilus influenzae     | 0.034            |                 | 0.012           |                  |        |             | 0.022 |       |                  |          |            |                               |                         |             |            |          |         |            |           |
| Klebsiella pneumoniae      | 2.54             | 0.278           |                 |                  | 0.2    | 0.222       | 1.02  |       | 0.446            |          |            |                               |                         |             |            |          | 0.38    |            |           |
| Morganella spp.            | 0.018            |                 |                 |                  |        |             | 0.002 | 0.003 | 0.014            |          |            |                               |                         |             |            |          |         |            |           |
| Mycobacterium tuberculosis | 0.024            |                 |                 |                  |        |             |       |       |                  | 0.002    |            |                               | 0.019                   |             |            | 0.0009   |         |            | 0.003     |
| Proteus spp.               | 0.204            | 0.004           | 0.037           |                  |        |             | 0.076 |       | 0.049            |          |            |                               |                         |             |            |          | 0.038   |            |           |
| Pseudomonas aeruginosa     | 1.41             | 0.071           |                 | 0.148            |        | 0.68        | 0.137 | 0.044 | 0.33             |          |            |                               |                         |             |            |          |         |            |           |
| Salmonella Typhi           | 0.026            |                 |                 |                  |        |             |       |       | 0.022            |          |            | 0.004                         |                         |             |            |          |         |            |           |
| Non-typhoidal Salmonella   | 0.003            |                 |                 |                  |        |             |       |       | 0.003            |          |            |                               |                         |             |            |          |         |            |           |
| Serratia spp.              | 0.192            | 0.015           |                 | 0.036            |        | 0.051       | 0.045 | 0.022 | 0.024            |          |            |                               |                         |             |            |          |         |            |           |
| Shigella spp.              | 0.0007           |                 |                 |                  |        |             |       |       | 0.0007           |          |            |                               |                         |             |            |          |         |            |           |
| Staphylococcus aureus      | 3.36             |                 |                 |                  |        |             |       |       | 0.171            |          | 0.259      |                               | 2.76                    |             |            |          | 0.128   | 0.049      |           |
| Streptococcus pneumoniae   | 1.55             |                 |                 |                  | 0.031  | 0.422       | 0.148 |       | 0.07             |          | 0.185      |                               |                         | 0.199       |            |          | 0.494   |            |           |
| All pathogens              | 20.5             | 0.986           | 0.219           | 0.762            | 0.696  | 3.78        | 2.54  | 0.33  | 5.48             | 0.002    | 0.639      | 0.004                         | 0.019                   | 2.76        | 0.213      | 0.0009   | 1.67    | 0.379      | 0.003     |
|                            | Resistance to 1+ | Aminoglycosides | Aminopenicillin | Anti-pseudomonal | BL-BLI | Carbapenems | 3GC   | 4GC   | Fluoroquinolones | Mono INH | Macrolides | MDR in S. Typhi and Paratyphi | MDR excluding XDR in TB | Methicillin | Penicillin | Mono RIF | TMP-SMX | Vancomycin | XDR in TB |

Counts  
 < 500

# Suriname

Deaths (count) associated with bacterial antimicrobial resistance by pathogen–drug combinations, 2019

|                            |                  |                 |                 |                  |        |             |       |       |                  |          |            |                               |                         |             |            |          |         |            |           |
|----------------------------|------------------|-----------------|-----------------|------------------|--------|-------------|-------|-------|------------------|----------|------------|-------------------------------|-------------------------|-------------|------------|----------|---------|------------|-----------|
| Acinetobacter baumannii    | 62.4             | 41              |                 | 59               | 46.7   | 47.8        | 50.9  | 54.3  | 55.4             |          |            |                               |                         |             |            |          |         |            |           |
| Citrobacter spp.           | 3.98             | 0.502           |                 | 1.11             |        | 0.645       | 2.63  | 2.02  | 1.71             |          |            |                               |                         |             |            |          |         |            |           |
| Enterobacter spp.          | 23.6             | 4.53            |                 | 8.24             |        | 5.5         |       | 12.9  | 12.2             |          |            |                               |                         |             |            |          | 16      |            |           |
| Enterococcus faecalis      | 10               |                 |                 |                  |        |             |       |       | 9.6              |          |            |                               |                         |             |            |          |         | 1.22       |           |
| Enterococcus faecium       | 16.4             |                 |                 |                  |        |             |       |       | 16.3             |          |            |                               |                         |             |            |          |         | 5.17       |           |
| Other enterococci          | 12.3             |                 |                 |                  |        |             |       |       | 12.3             |          |            |                               |                         |             |            |          |         | 0.739      |           |
| Escherichia coli           | 63.5             | 14.7            | 61.2            |                  | 50.7   | 6.58        | 28.6  |       | 31.8             |          |            |                               |                         |             |            |          | 43.8    |            |           |
| Group A Streptococcus      | 4.44             |                 |                 |                  |        |             |       |       |                  |          | 4.44       |                               |                         |             |            |          |         |            |           |
| Group B Streptococcus      | 6.99             |                 |                 |                  |        |             |       |       | 2.89             |          | 5.27       |                               |                         | 0.399       |            |          |         |            |           |
| Haemophilus influenzae     | 0.697            |                 | 0.411           |                  |        |             | 0.384 |       |                  |          |            |                               |                         |             |            |          |         |            |           |
| Klebsiella pneumoniae      | 51.2             | 20.1            |                 |                  | 44.7   | 4.61        | 37.3  |       | 31.5             |          |            |                               |                         |             |            |          | 40.6    |            |           |
| Morganella spp.            | 0.428            |                 |                 |                  |        |             | 0.077 | 0.087 | 0.396            |          |            |                               |                         |             |            |          |         |            |           |
| Mycobacterium tuberculosis | 0.151            |                 |                 |                  |        |             |       |       |                  | 0.036    |            |                               | 0.087                   |             |            | 0.014    |         |            | 0.014     |
| Proteus spp.               | 9.26             | 0.7             | 8.48            |                  |        |             | 1.79  |       | 3.42             |          |            |                               |                         |             |            |          | 5.88    |            |           |
| Pseudomonas aeruginosa     | 28.7             | 14.1            |                 | 12.2             |        | 18.3        | 14.1  | 9.99  | 15.7             |          |            |                               |                         |             |            |          |         |            |           |
| Salmonella Typhi           | 1.07             |                 |                 |                  |        |             |       |       | 0.86             |          |            | 0.261                         |                         |             |            |          |         |            |           |
| Non-typhoidal Salmonella   | 0.104            |                 |                 |                  |        |             |       |       | 0.104            |          |            |                               |                         |             |            |          |         |            |           |
| Serratia spp.              | 4.54             | 1.72            |                 | 1.38             |        | 1.19        | 2.9   | 1.63  | 1.19             |          |            |                               |                         |             |            |          |         |            |           |
| Shigella spp.              | 0.023            |                 |                 |                  |        |             |       |       | 0.023            |          |            |                               |                         |             |            |          |         |            |           |
| Staphylococcus aureus      | 53.2             |                 |                 |                  |        |             |       |       | 19.3             |          | 34.5       |                               | 46.2                    |             |            |          | 14.2    | 0.791      |           |
| Streptococcus pneumoniae   | 36.8             |                 |                 |                  | 6.96   | 8.43        | 9.77  |       | 2.88             |          | 21.3       |                               |                         | 17.8        |            |          | 27.3    |            |           |
| All pathogens              | 390              | 97.4            | 70.1            | 81.9             | 149    | 93          | 148   | 81    | 218              | 0.036    | 65.6       | 0.261                         | 0.087                   | 46.2        | 18.2       | 0.014    | 148     | 7.92       | 0.014     |
|                            | Resistance to 1+ | Aminoglycosides | Aminopenicillin | Anti-pseudomonal | BL-BLI | Carbapenems | 3GC   | 4GC   | Fluoroquinolones | Mono INH | Macrolides | MDR in S. Typhi and Paratyphi | MDR excluding XDR in TB | Methicillin | Penicillin | Mono RIF | TMP-SMX | Vancomycin | XDR in TB |

Counts  
 < 500



# Suriname

Deaths (count) *attributable to* bacterial antimicrobial resistance by pathogen–drug combinations, 2019

|                            |                  |                 |                 |                  |        |             |       |       |                  |          |            |                               |                         |             |            |          |         |            |           |
|----------------------------|------------------|-----------------|-----------------|------------------|--------|-------------|-------|-------|------------------|----------|------------|-------------------------------|-------------------------|-------------|------------|----------|---------|------------|-----------|
| Acinetobacter baumannii    | 19.5             | 1.74            |                 | 2.33             | 0.06   | 7.73        | 0.511 | 0.108 | 7.04             |          |            |                               |                         |             |            |          |         |            |           |
| Citrobacter spp.           | 1.13             | 0.026           |                 | 0.21             |        | 0.153       | 0.24  | 0.225 | 0.271            |          |            |                               |                         |             |            |          |         |            |           |
| Enterobacter spp.          | 5.41             | 0.263           |                 | 0.759            |        | 1.23        |       | 0.777 | 1.44             |          |            |                               |                         |             |            |          | 0.944   |            |           |
| Enterococcus faecalis      | 2.74             |                 |                 |                  |        |             |       |       | 2.37             |          |            |                               |                         |             |            |          |         | 0.365      |           |
| Enterococcus faecium       | 4.27             |                 |                 |                  |        |             |       |       | 3.07             |          |            |                               |                         |             |            |          |         | 1.2        |           |
| Other enterococci          | 2.52             |                 |                 |                  |        |             |       |       | 2.38             |          |            |                               |                         |             |            |          |         | 0.133      |           |
| Escherichia coli           | 15.5             | 0.903           | 0.854           |                  | 2.69   | 1.47        | 3.74  |       | 3.2              |          |            |                               |                         |             |            |          | 2.63    |            |           |
| Group A Streptococcus      | 0.427            |                 |                 |                  |        |             |       |       |                  |          | 0.427      |                               |                         |             |            |          |         |            |           |
| Group B Streptococcus      | 1.1              |                 |                 |                  |        |             |       |       | 0.514            |          | 0.51       |                               |                         | 0.073       |            |          |         |            |           |
| Haemophilus influenzae     | 0.172            |                 | 0.059           |                  |        |             | 0.113 |       |                  |          |            |                               |                         |             |            |          |         |            |           |
| Klebsiella pneumoniae      | 13.2             | 1.52            |                 |                  | 1.17   | 1.18        | 5.13  |       | 2.13             |          |            |                               |                         |             |            |          | 2.07    |            |           |
| Morganella spp.            | 0.096            |                 |                 |                  |        |             | 0.008 | 0.014 | 0.074            |          |            |                               |                         |             |            |          |         |            |           |
| Mycobacterium tuberculosis | 0.07             |                 |                 |                  |        |             |       |       |                  | 0.006    |            |                               | 0.052                   |             |            | 0.004    |         |            | 0.009     |
| Proteus spp.               | 1.12             | 0.04            | 0.194           |                  |        |             | 0.416 |       | 0.24             |          |            |                               |                         |             |            |          | 0.231   |            |           |
| Pseudomonas aeruginosa     | 6.77             | 0.38            |                 | 0.724            |        | 3.2         | 0.644 | 0.165 | 1.66             |          |            |                               |                         |             |            |          |         |            |           |
| Salmonella Typhi           | 0.209            |                 |                 |                  |        |             |       |       | 0.177            |          |            | 0.032                         |                         |             |            |          |         |            |           |
| Non-typhoidal Salmonella   | 0.022            |                 |                 |                  |        |             |       |       | 0.022            |          |            |                               |                         |             |            |          |         |            |           |
| Serratia spp.              | 1.14             | 0.102           |                 | 0.258            |        | 0.317       | 0.21  | 0.127 | 0.126            |          |            |                               |                         |             |            |          |         |            |           |
| Shigella spp.              | 0.005            |                 |                 |                  |        |             |       |       | 0.005            |          |            |                               |                         |             |            |          |         |            |           |
| Staphylococcus aureus      | 15.6             |                 |                 |                  |        |             |       |       | 0.817            |          | 1.21       |                               | 12.2                    |             |            |          | 1.18    | 0.188      |           |
| Streptococcus pneumoniae   | 7.47             |                 |                 |                  | 0.13   | 1.82        | 0.796 |       | 0.335            |          | 0.852      |                               |                         | 1.17        |            |          | 2.37    |            |           |
| All pathogens              | 98.5             | 4.97            | 1.11            | 4.28             | 4.05   | 17.1        | 11.8  | 1.42  | 25.9             | 0.006    | 3          | 0.032                         | 0.052                   | 12.2        | 1.24       | 0.004    | 9.42    | 1.88       | 0.009     |
|                            | Resistance to 1+ | Aminoglycosides | Aminopenicillin | Anti-pseudomonal | BL-BLI | Carbapenems | 3GC   | 4GC   | Fluoroquinolones | Mono INH | Macrolides | MDR in S. Typhi and Paratyphi | MDR excluding XDR in TB | Methicillin | Penicillin | Mono RIF | TMP-SMX | Vancomycin | XDR in TB |

Counts  
 < 500

# The Bahamas

Deaths (count) associated with bacterial antimicrobial resistance by pathogen–drug combinations, 2019

|                            |                  |                 |                 |                  |        |             |       |       |                  |          |            |                               |                         |             |            |          |         |            |           |
|----------------------------|------------------|-----------------|-----------------|------------------|--------|-------------|-------|-------|------------------|----------|------------|-------------------------------|-------------------------|-------------|------------|----------|---------|------------|-----------|
| Acinetobacter baumannii    | 19.9             | 15              |                 | 18.9             | 16.8   | 17.4        | 19    | 17.5  | 19.8             |          |            |                               |                         |             |            |          |         |            |           |
| Citrobacter spp.           | 0.963            | 0.184           |                 | 0.194            |        | 0.346       | 0.613 | 0.381 | 0.368            |          |            |                               |                         |             |            |          |         |            |           |
| Enterobacter spp.          | 6.64             | 1.4             |                 | 2.74             |        | 1.78        |       | 3.33  | 2.55             |          |            |                               |                         |             |            |          | 4.27    |            |           |
| Enterococcus faecalis      | 4.79             |                 |                 |                  |        |             |       |       | 4.36             |          |            |                               |                         |             |            |          |         | 0.909      |           |
| Enterococcus faecium       | 10.6             |                 |                 |                  |        |             |       |       | 10.5             |          |            |                               |                         |             |            |          |         | 4.89       |           |
| Other enterococci          | 5.39             |                 |                 |                  |        |             |       |       | 5.38             |          |            |                               |                         |             |            |          |         | 0.432      |           |
| Escherichia coli           | 40.2             | 5.3             | 38              |                  | 32.1   | 3.31        | 18.9  |       | 23               |          |            |                               |                         |             |            |          | 27.7    |            |           |
| Group A Streptococcus      | 1.35             |                 |                 |                  |        |             |       |       |                  |          | 1.35       |                               |                         |             |            |          |         |            |           |
| Group B Streptococcus      | 3.65             |                 |                 |                  |        |             |       |       | 0.98             |          | 3.11       |                               |                         | 0.141       |            |          |         |            |           |
| Haemophilus influenzae     | 0.493            |                 | 0.236           |                  |        |             | 0.33  |       |                  |          |            |                               |                         |             |            |          |         |            |           |
| Klebsiella pneumoniae      | 32.5             | 8.83            |                 |                  | 29.1   | 3.34        | 19.1  |       | 20.5             |          |            |                               |                         |             |            |          | 26.4    |            |           |
| Morganella spp.            | 0.201            |                 |                 |                  |        |             | 0.045 | 0.056 | 0.176            |          |            |                               |                         |             |            |          |         |            |           |
| Mycobacterium tuberculosis | 0.841            |                 |                 |                  |        |             |       |       |                  | 0.011    |            |                               | 0.239                   |             |            | 0.552    |         |            | 0.04      |
| Proteus spp.               | 5.18             | 1.17            | 4.85            |                  |        |             | 1.03  |       | 2.57             |          |            |                               |                         |             |            |          | 3.19    |            |           |
| Pseudomonas aeruginosa     | 19.6             | 7.06            |                 | 8.45             |        | 14.8        | 8.39  | 7.35  | 12               |          |            |                               |                         |             |            |          |         |            |           |
| Salmonella Typhi           | 0.643            |                 |                 |                  |        |             |       |       | 0.531            |          |            | 0.139                         |                         |             |            |          |         |            |           |
| Non-typhoidal Salmonella   | 0.029            |                 |                 |                  |        |             |       |       | 0.029            |          |            |                               |                         |             |            |          |         |            |           |
| Serratia spp.              | 1.67             | 0.484           |                 | 0.471            |        | 0.44        | 1.1   | 0.832 | 0.355            |          |            |                               |                         |             |            |          |         |            |           |
| Shigella spp.              | 0.007            |                 |                 |                  |        |             |       |       | 0.007            |          |            |                               |                         |             |            |          |         |            |           |
| Staphylococcus aureus      | 41               |                 |                 |                  |        |             |       |       | 26               |          | 29.9       |                               | 23.1                    |             |            |          | 9.76    | 0.579      |           |
| Streptococcus pneumoniae   | 20.9             |                 |                 |                  | 4.24   | 8.37        | 4.1   |       | 0.816            |          | 14.9       |                               |                         | 6.19        |            |          | 15.2    |            |           |
| All pathogens              | 217              | 39.5            | 43.1            | 30.8             | 82.3   | 49.8        | 72.7  | 29.5  | 130              | 0.011    | 49.2       | 0.139                         | 0.239                   | 23.1        | 6.33       | 0.552    | 86.4    | 6.81       | 0.04      |
|                            | Resistance to 1+ | Aminoglycosides | Aminopenicillin | Anti-pseudomonal | BL-BLI | Carbapenems | 3GC   | 4GC   | Fluoroquinolones | Mono INH | Macrolides | MDR in S. Typhi and Paratyphi | MDR excluding XDR in TB | Methicillin | Penicillin | Mono RIF | TMP-SMX | Vancomycin | XDR in TB |

Counts  
 < 500

# The Bahamas

Deaths (count) *attributable to* bacterial antimicrobial resistance by pathogen–drug combinations, 2019

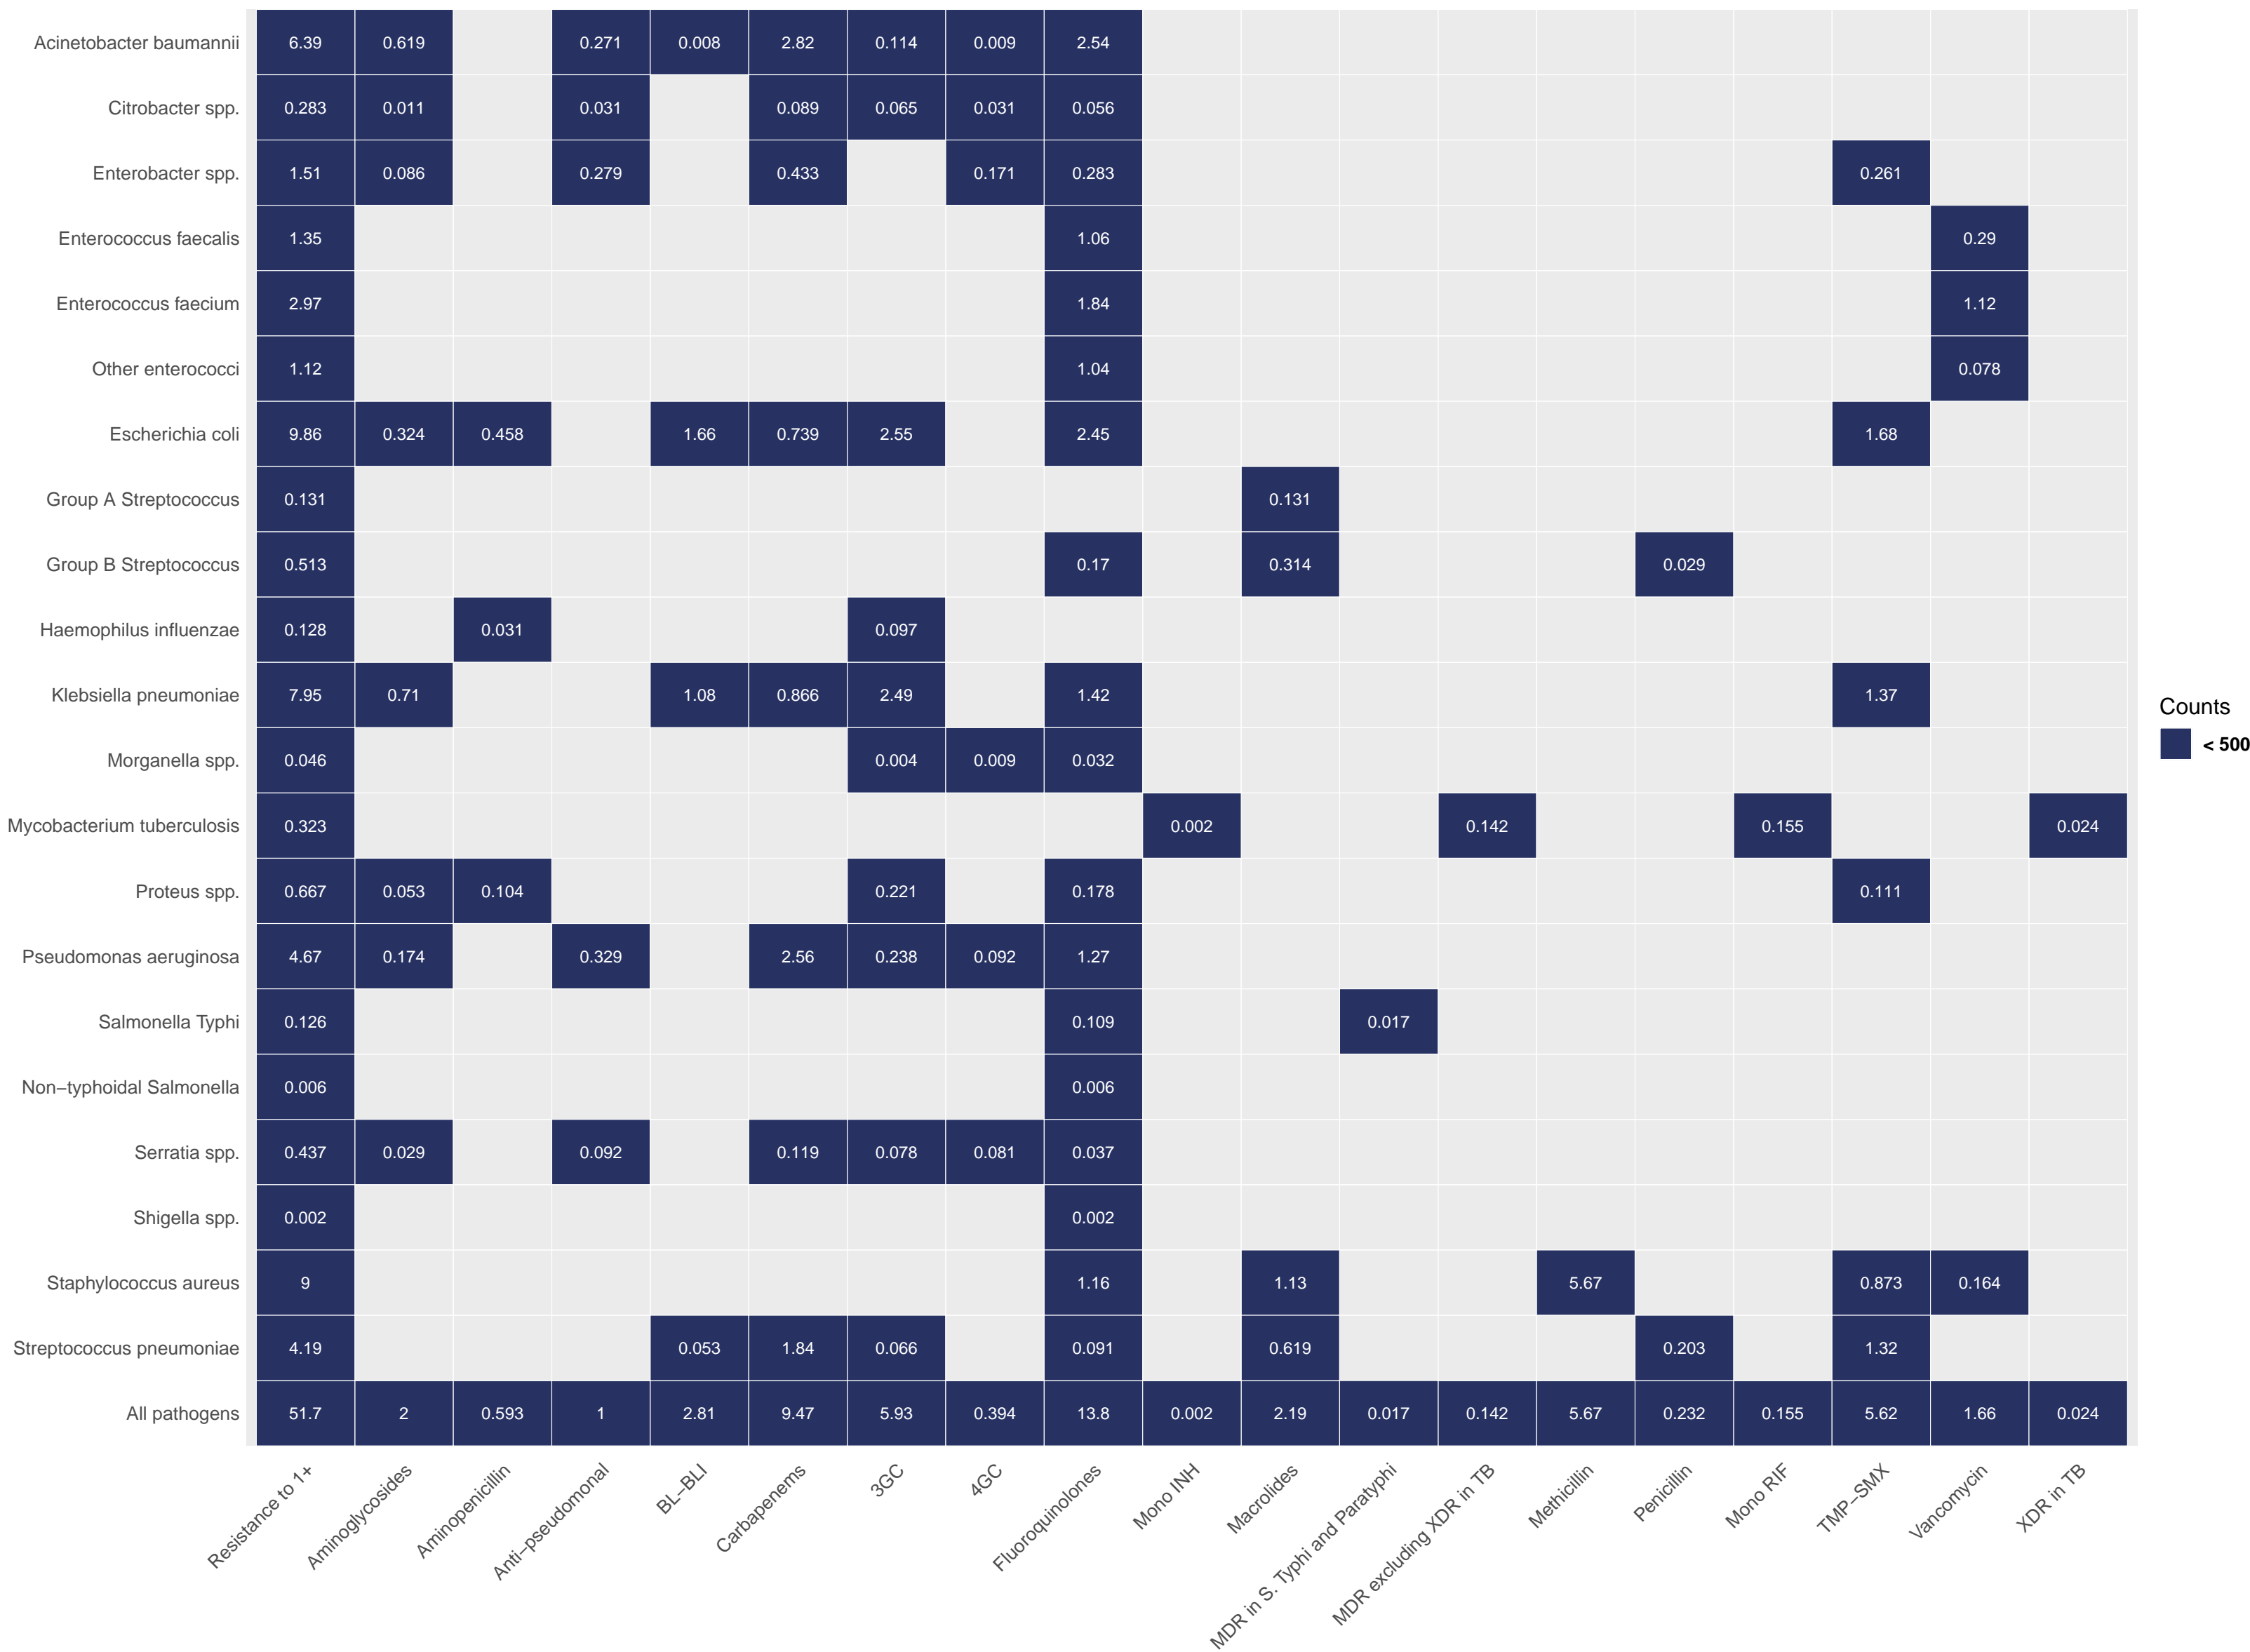

Counts  
 < 500

# Trinidad and Tobago

Deaths (count) associated with bacterial antimicrobial resistance by pathogen–drug combinations, 2019

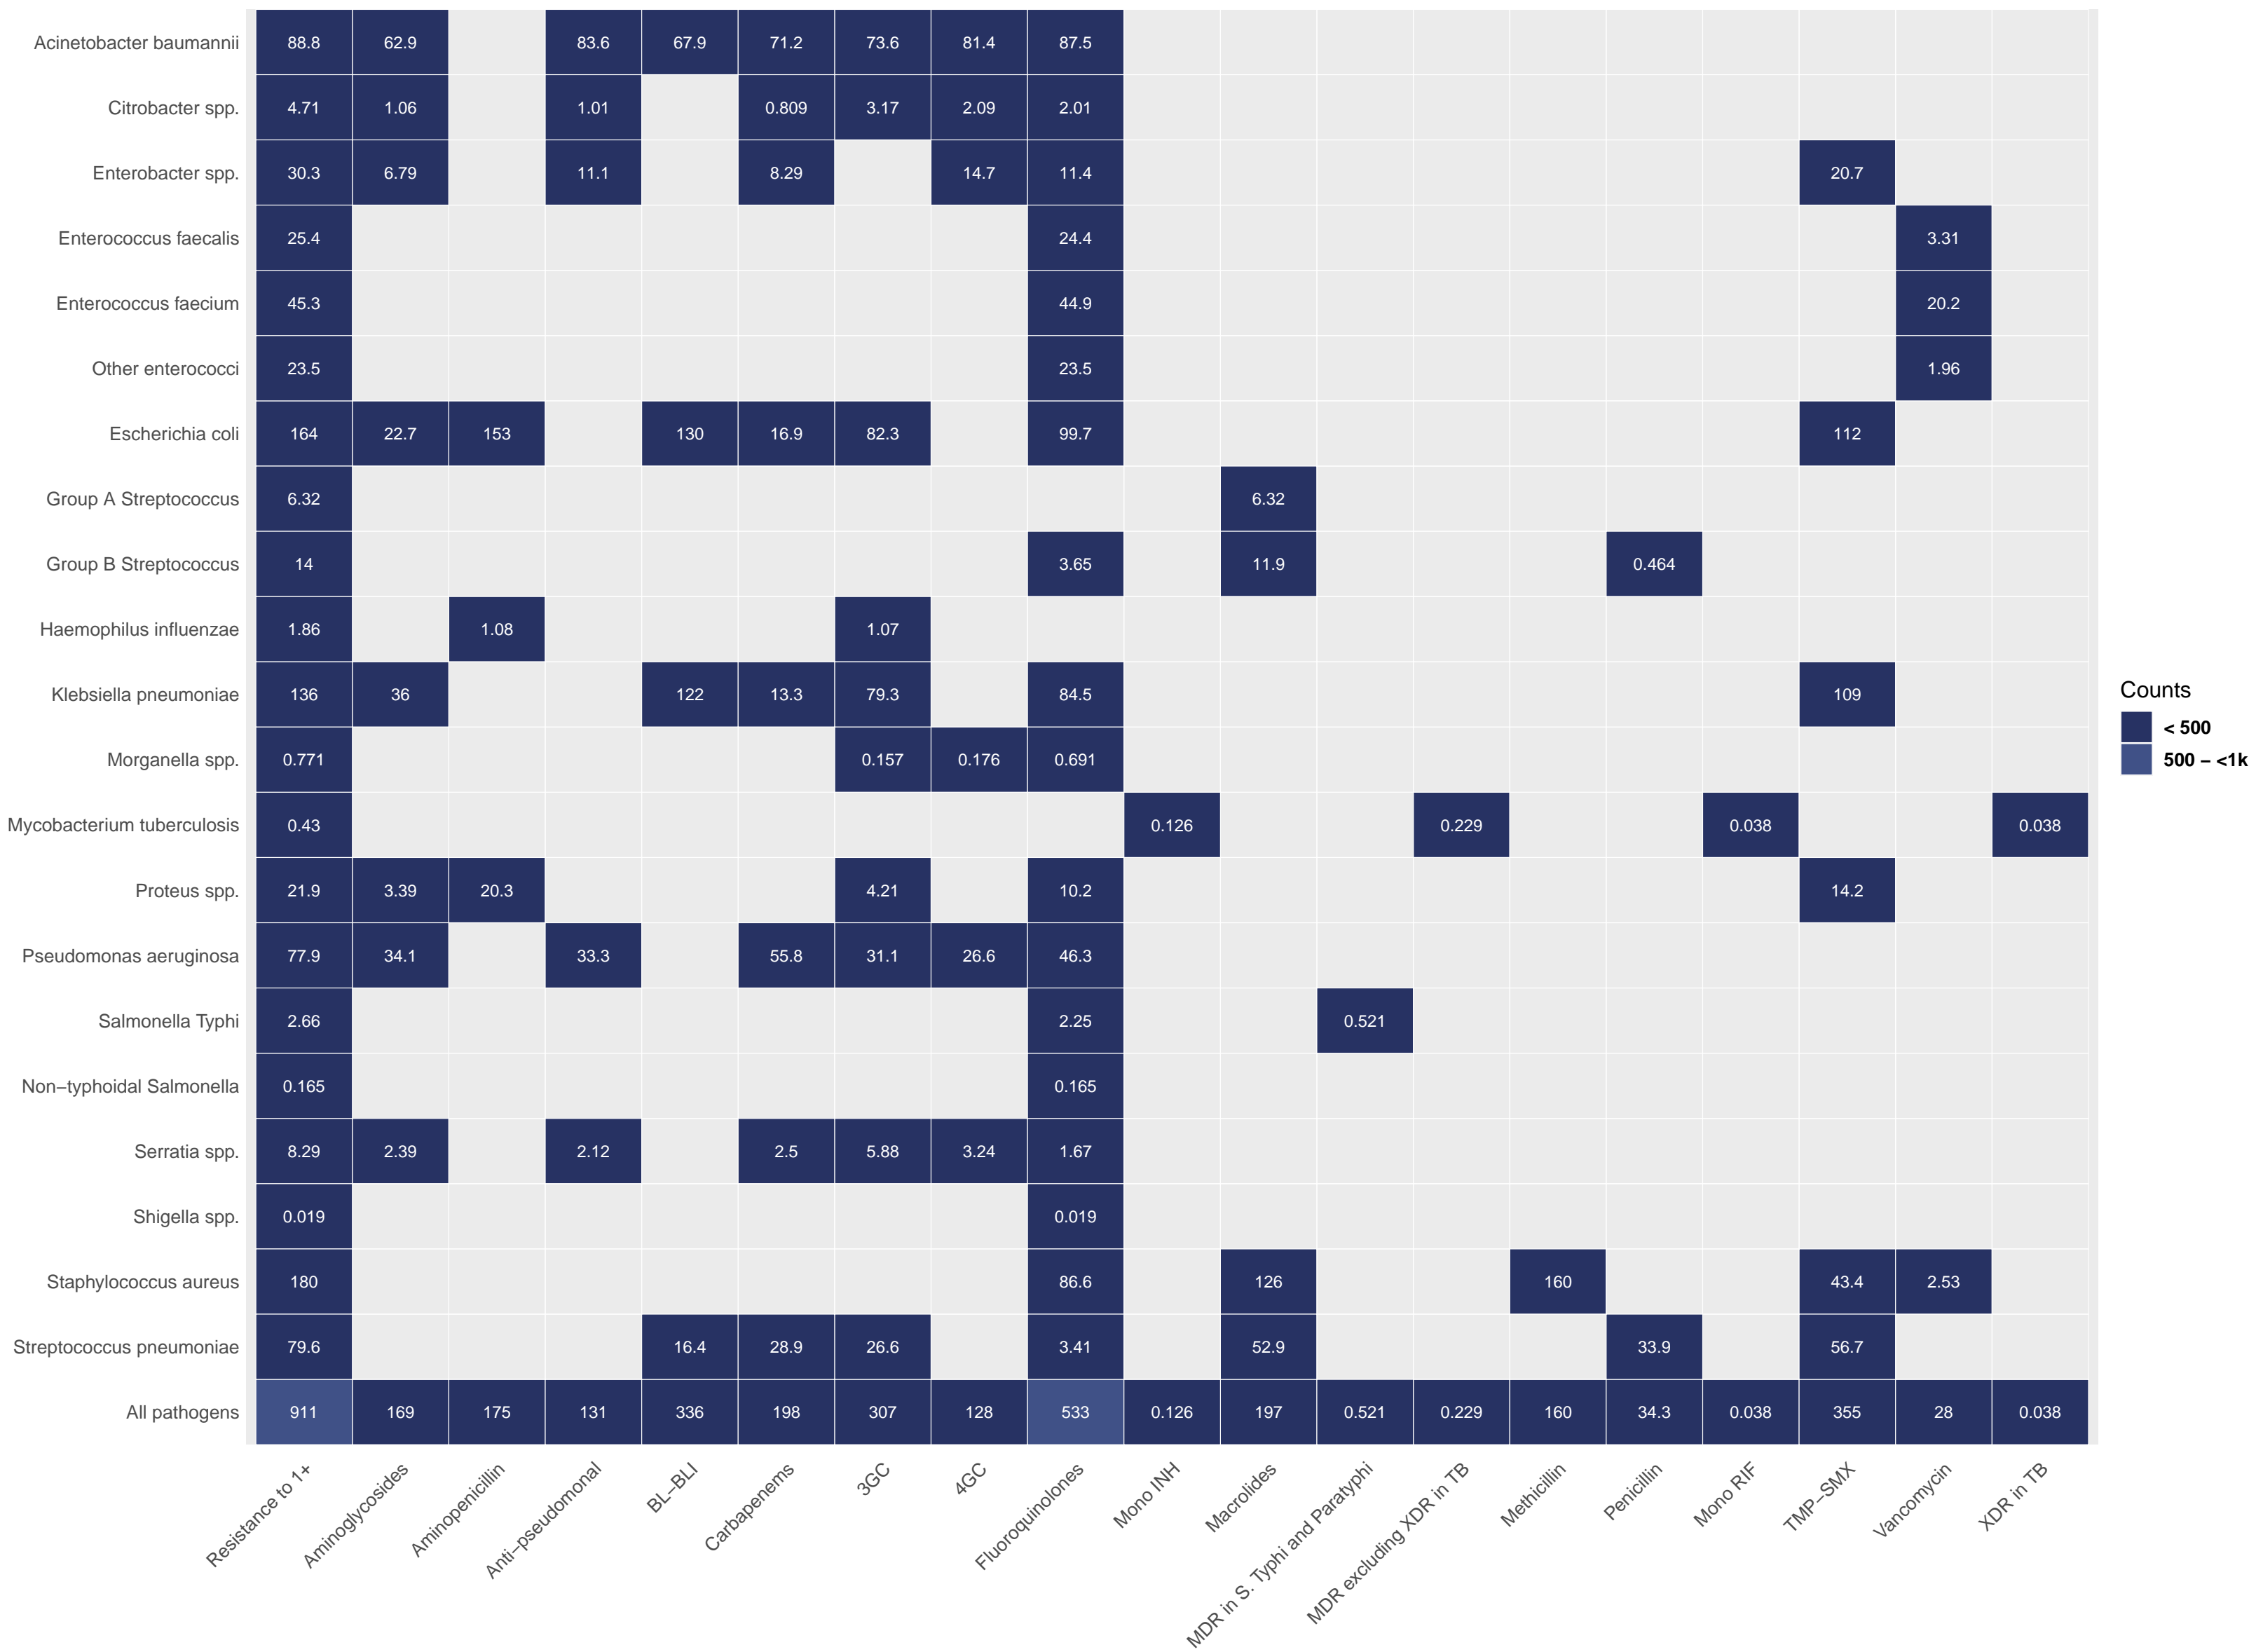

# Trinidad and Tobago

Deaths (count) *attributable to* bacterial antimicrobial resistance by pathogen–drug combinations, 2019

|                            |                  |                 |                 |                  |        |             |       |       |                  |          |            |                               |                         |             |            |          |         |            |           |
|----------------------------|------------------|-----------------|-----------------|------------------|--------|-------------|-------|-------|------------------|----------|------------|-------------------------------|-------------------------|-------------|------------|----------|---------|------------|-----------|
| Acinetobacter baumannii    | 28               | 2.65            |                 | 1.98             | 0.033  | 11.5        | 0.279 | 0.206 | 11.4             |          |            |                               |                         |             |            |          |         |            |           |
| Citrobacter spp.           | 1.33             | 0.061           |                 | 0.191            |        | 0.191       | 0.345 | 0.232 | 0.312            |          |            |                               |                         |             |            |          |         |            |           |
| Enterobacter spp.          | 6.83             | 0.421           |                 | 1.07             |        | 2.01        |       | 0.767 | 1.25             |          |            |                               |                         |             |            |          | 1.3     |            |           |
| Enterococcus faecalis      | 6.95             |                 |                 |                  |        |             |       |       | 5.99             |          |            |                               |                         |             |            |          |         | 0.956      |           |
| Enterococcus faecium       | 12.6             |                 |                 |                  |        |             |       |       | 7.94             |          |            |                               |                         |             |            |          |         | 4.64       |           |
| Other enterococci          | 4.88             |                 |                 |                  |        |             |       |       | 4.53             |          |            |                               |                         |             |            |          |         | 0.356      |           |
| Escherichia coli           | 41.2             | 1.36            | 1.7             |                  | 6.19   | 3.73        | 10.8  |       | 10.7             |          |            |                               |                         |             |            |          |         | 6.61       |           |
| Group A Streptococcus      | 0.608            |                 |                 |                  |        |             |       |       |                  |          | 0.608      |                               |                         |             |            |          |         |            |           |
| Group B Streptococcus      | 1.97             |                 |                 |                  |        |             |       |       | 0.636            |          | 1.22       |                               |                         | 0.11        |            |          |         |            |           |
| Haemophilus influenzae     | 0.463            |                 | 0.15            |                  |        |             | 0.313 |       |                  |          |            |                               |                         |             |            |          |         |            |           |
| Klebsiella pneumoniae      | 33               | 2.91            |                 |                  | 4.66   | 3.5         | 10.4  |       | 5.87             |          |            |                               |                         |             |            |          |         | 5.69       |           |
| Morganella spp.            | 0.174            |                 |                 |                  |        |             | 0.016 | 0.03  | 0.128            |          |            |                               |                         |             |            |          |         |            |           |
| Mycobacterium tuberculosis | 0.191            |                 |                 |                  |        |             |       |       |                  | 0.02     |            |                               | 0.137                   |             |            | 0.011    |         |            | 0.024     |
| Proteus spp.               | 2.76             | 0.16            | 0.447           |                  |        |             | 0.927 |       | 0.707            |          |            |                               |                         |             |            |          |         | 0.521      |           |
| Pseudomonas aeruginosa     | 18.2             | 0.879           |                 | 1.54             |        | 9.64        | 0.894 | 0.332 | 4.91             |          |            |                               |                         |             |            |          |         |            |           |
| Salmonella Typhi           | 0.52             |                 |                 |                  |        |             |       |       | 0.458            |          |            | 0.062                         |                         |             |            |          |         |            |           |
| Non-typhoidal Salmonella   | 0.034            |                 |                 |                  |        |             |       |       | 0.034            |          |            |                               |                         |             |            |          |         |            |           |
| Serratia spp.              | 2.21             | 0.141           |                 | 0.41             |        | 0.683       | 0.518 | 0.281 | 0.175            |          |            |                               |                         |             |            |          |         |            |           |
| Shigella spp.              | 0.004            |                 |                 |                  |        |             |       |       | 0.004            |          |            |                               |                         |             |            |          |         |            |           |
| Staphylococcus aureus      | 53.5             |                 |                 |                  |        |             |       |       | 3.52             |          | 4.3        |                               | 41.7                    |             |            |          |         | 3.38       | 0.571     |
| Streptococcus pneumoniae   | 16.9             |                 |                 |                  | 0.164  | 6.33        | 1.62  |       | 0.372            |          | 2.17       |                               |                         | 1.46        |            |          |         | 4.84       |           |
| All pathogens              | 232              | 8.58            | 2.3             | 5.19             | 11     | 37.5        | 26.1  | 1.85  | 59               | 0.02     | 8.29       | 0.062                         | 0.137                   | 41.7        | 1.57       | 0.011    | 22.3    | 6.53       | 0.024     |
|                            | Resistance to 1+ | Aminoglycosides | Aminopenicillin | Anti-pseudomonal | BL-BLI | Carbapenems | 3GC   | 4GC   | Fluoroquinolones | Mono INH | Macrolides | MDR in S. Typhi and Paratyphi | MDR excluding XDR in TB | Methicillin | Penicillin | Mono RIF | TMP-SMX | Vancomycin | XDR in TB |

Counts  
 < 500

# United States of America

Deaths (count) associated with bacterial antimicrobial resistance by pathogen–drug combinations, 2019

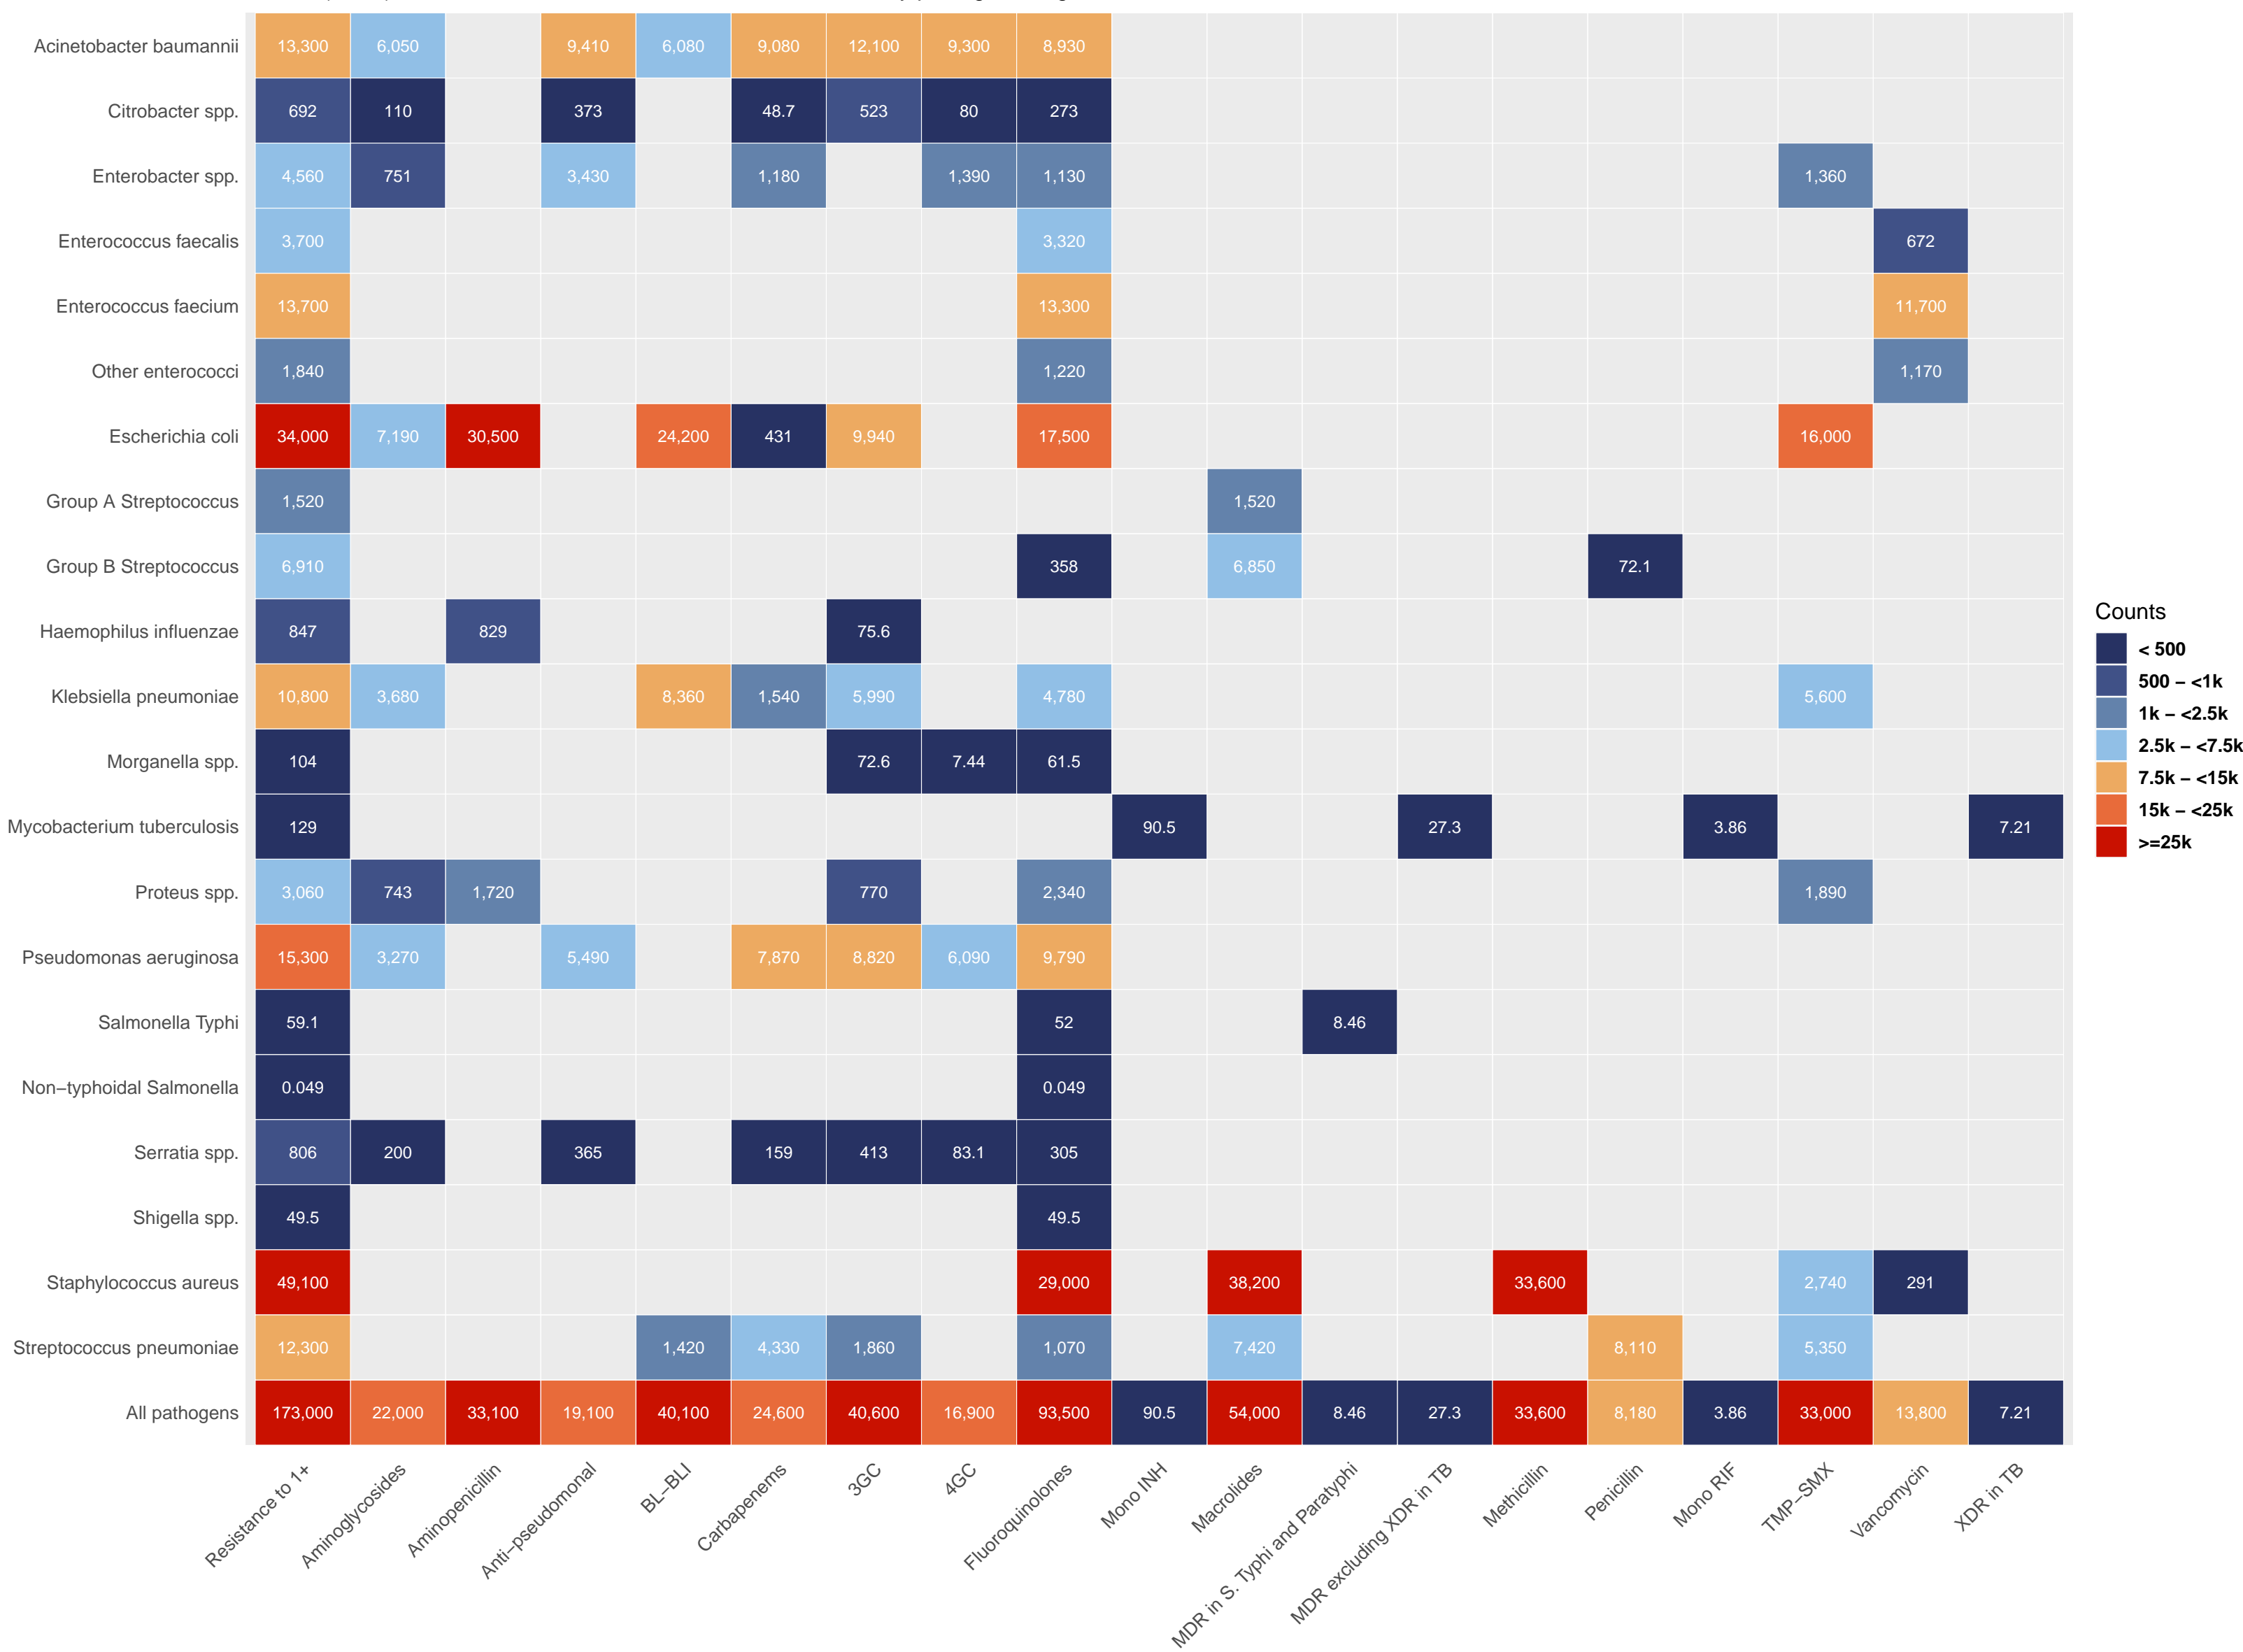

# United States of America

Deaths (count) *attributable to* bacterial antimicrobial resistance by pathogen–drug combinations, 2019

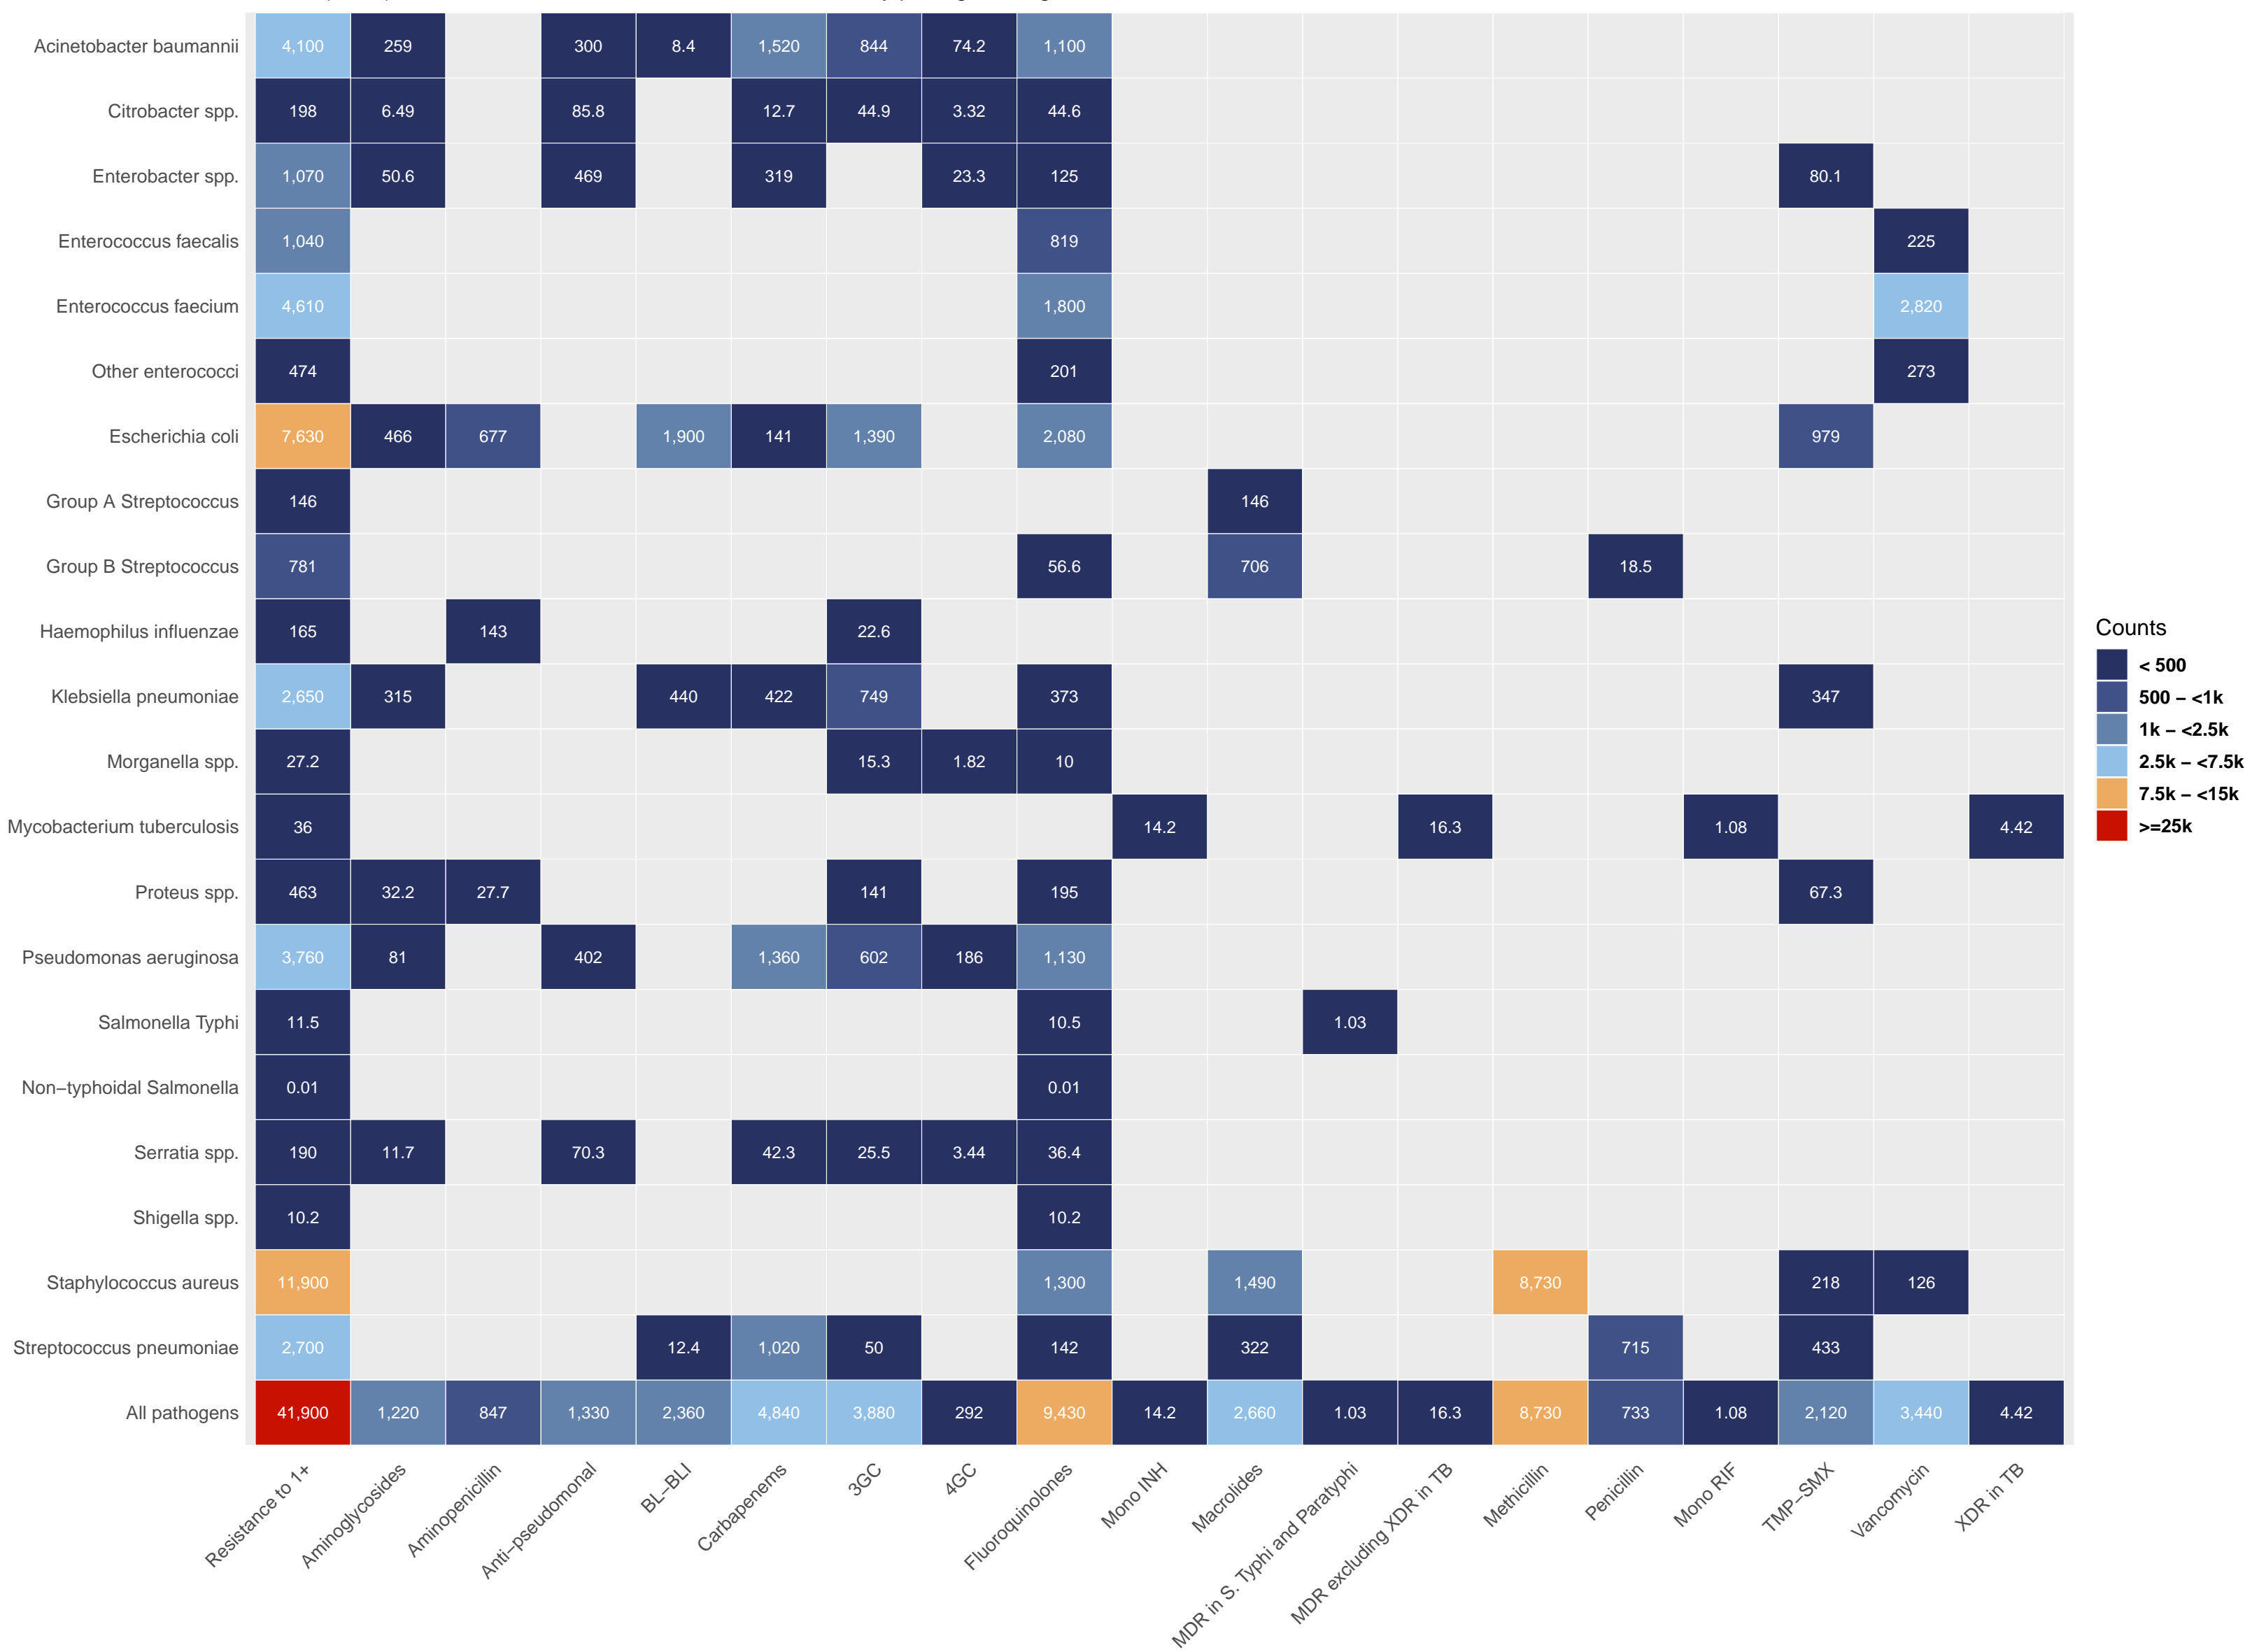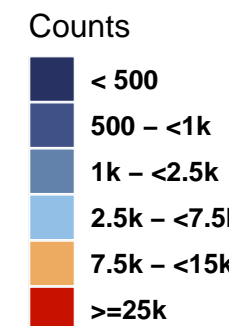

# Uruguay

Deaths (count) associated with bacterial antimicrobial resistance by pathogen–drug combinations, 2019

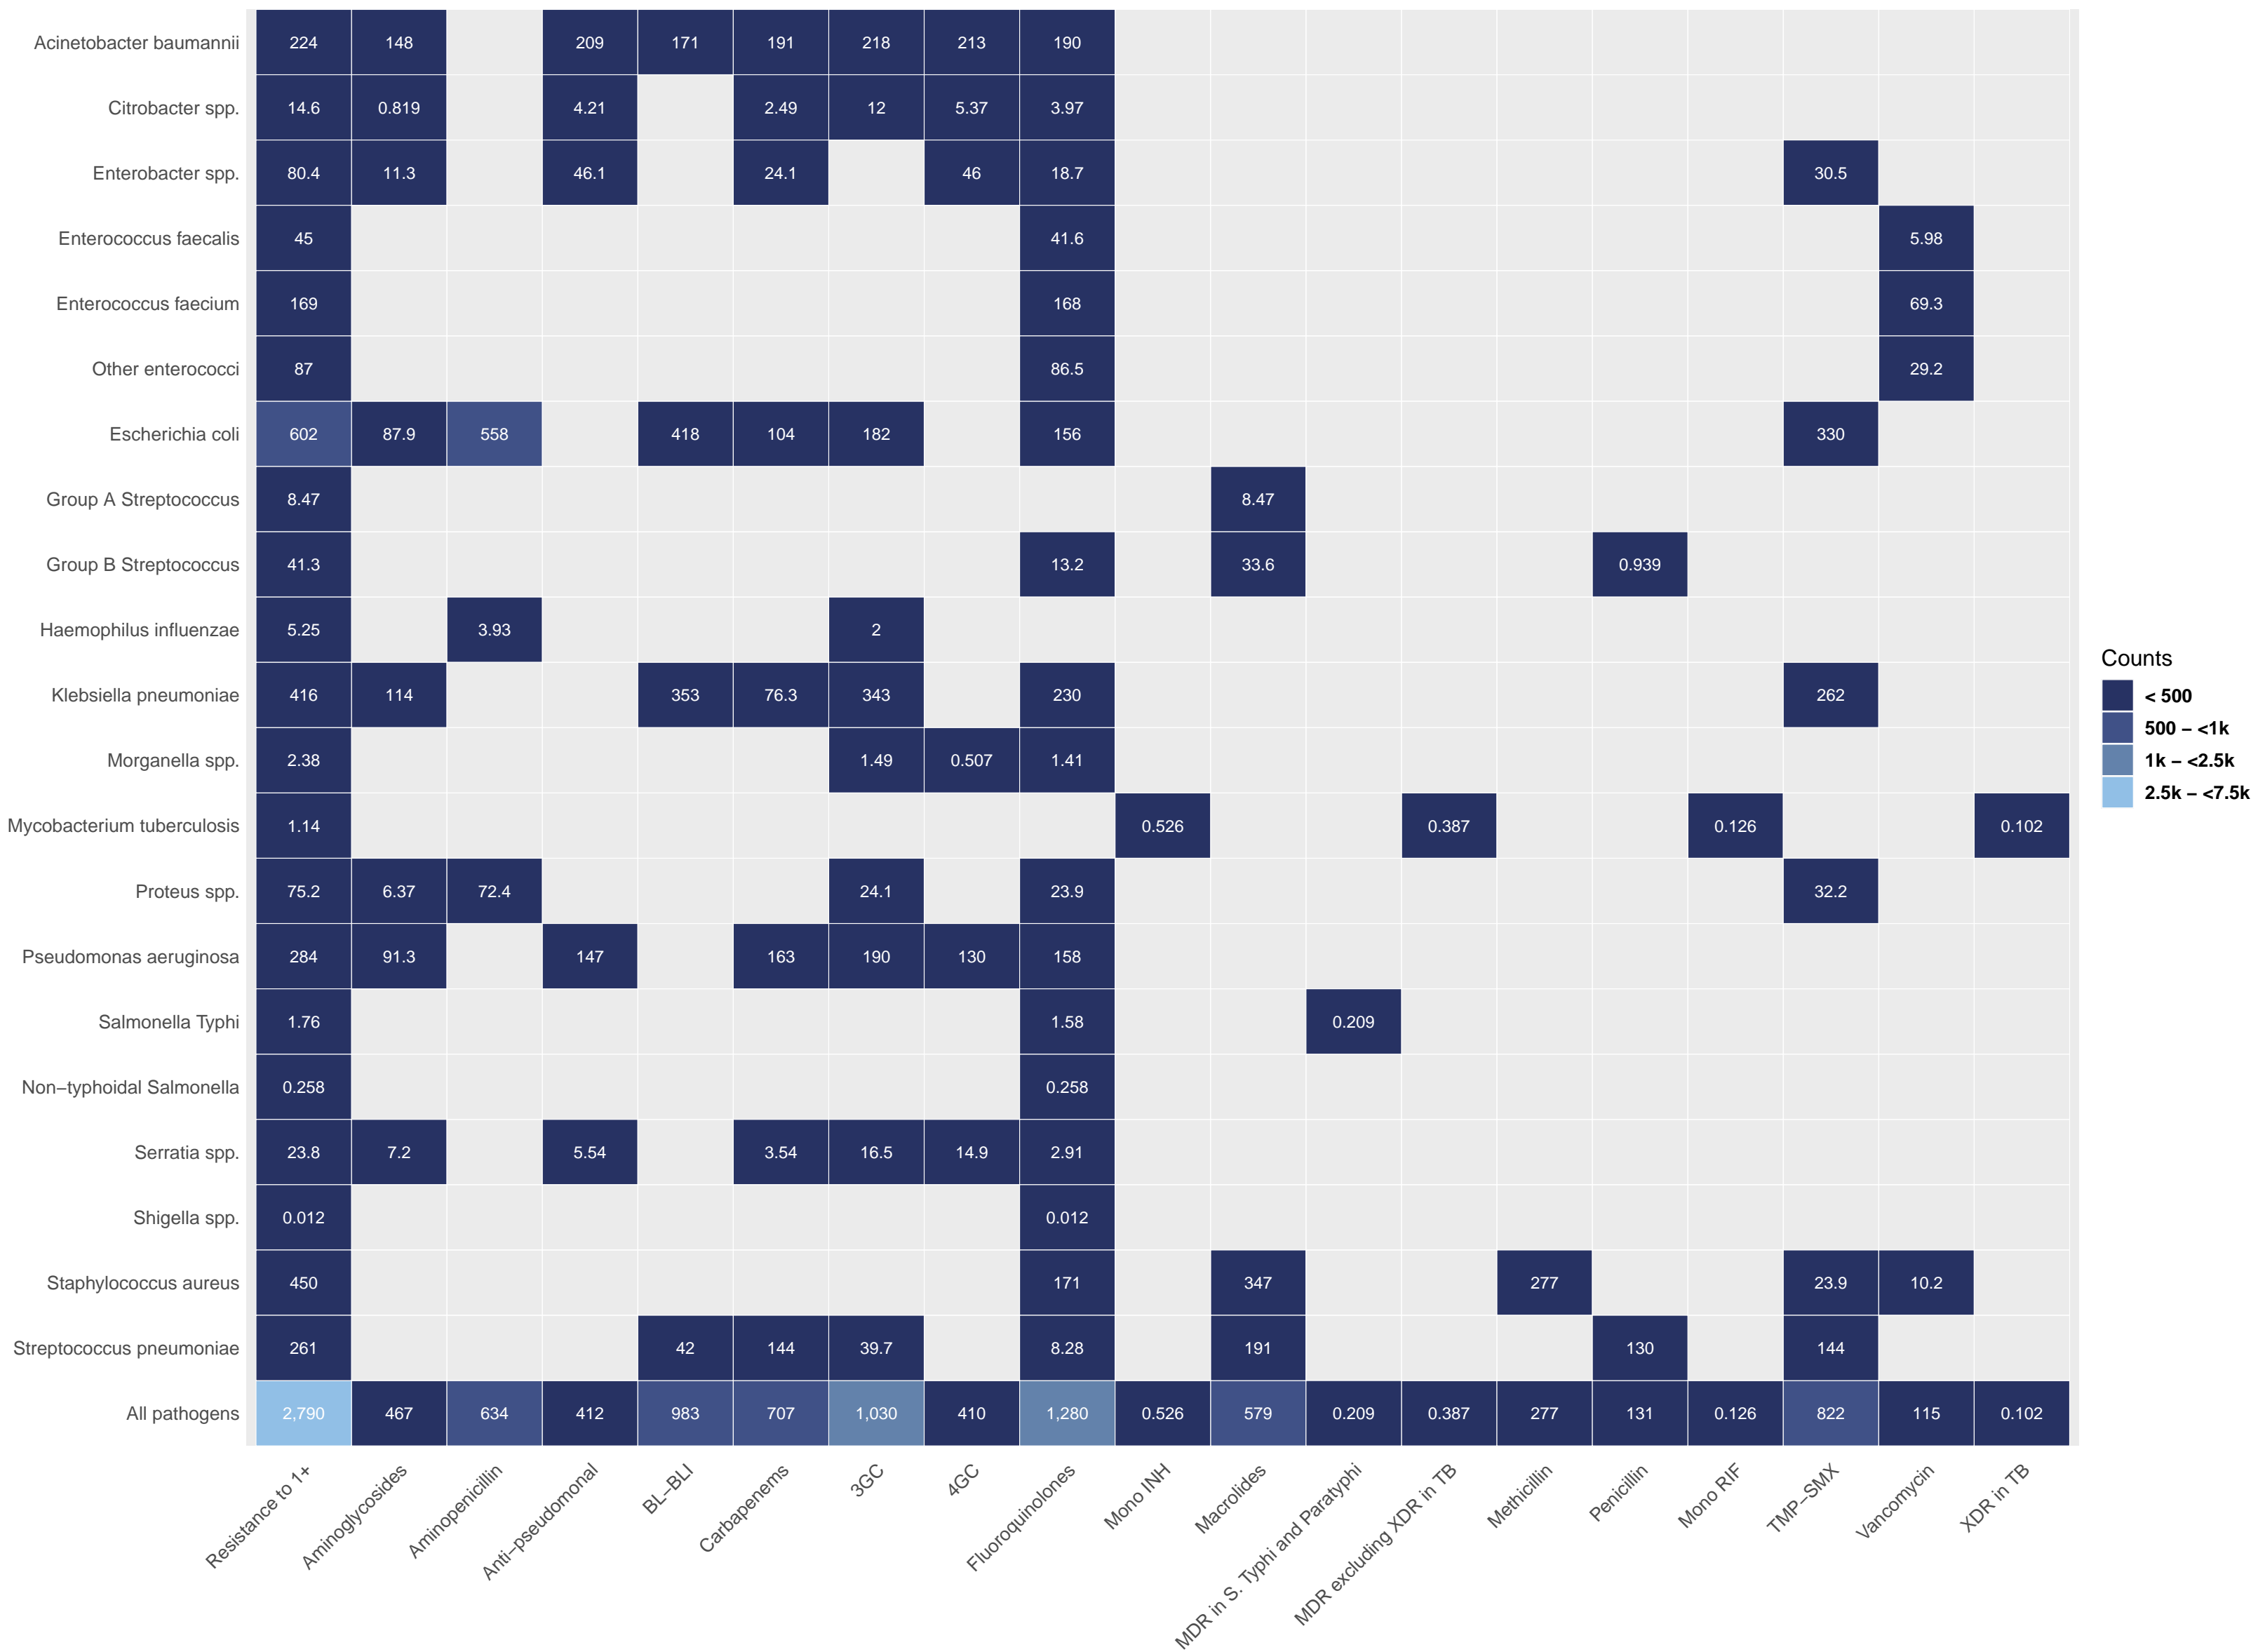



# Uruguay

Deaths (count) *attributable to* bacterial antimicrobial resistance by pathogen–drug combinations, 2019

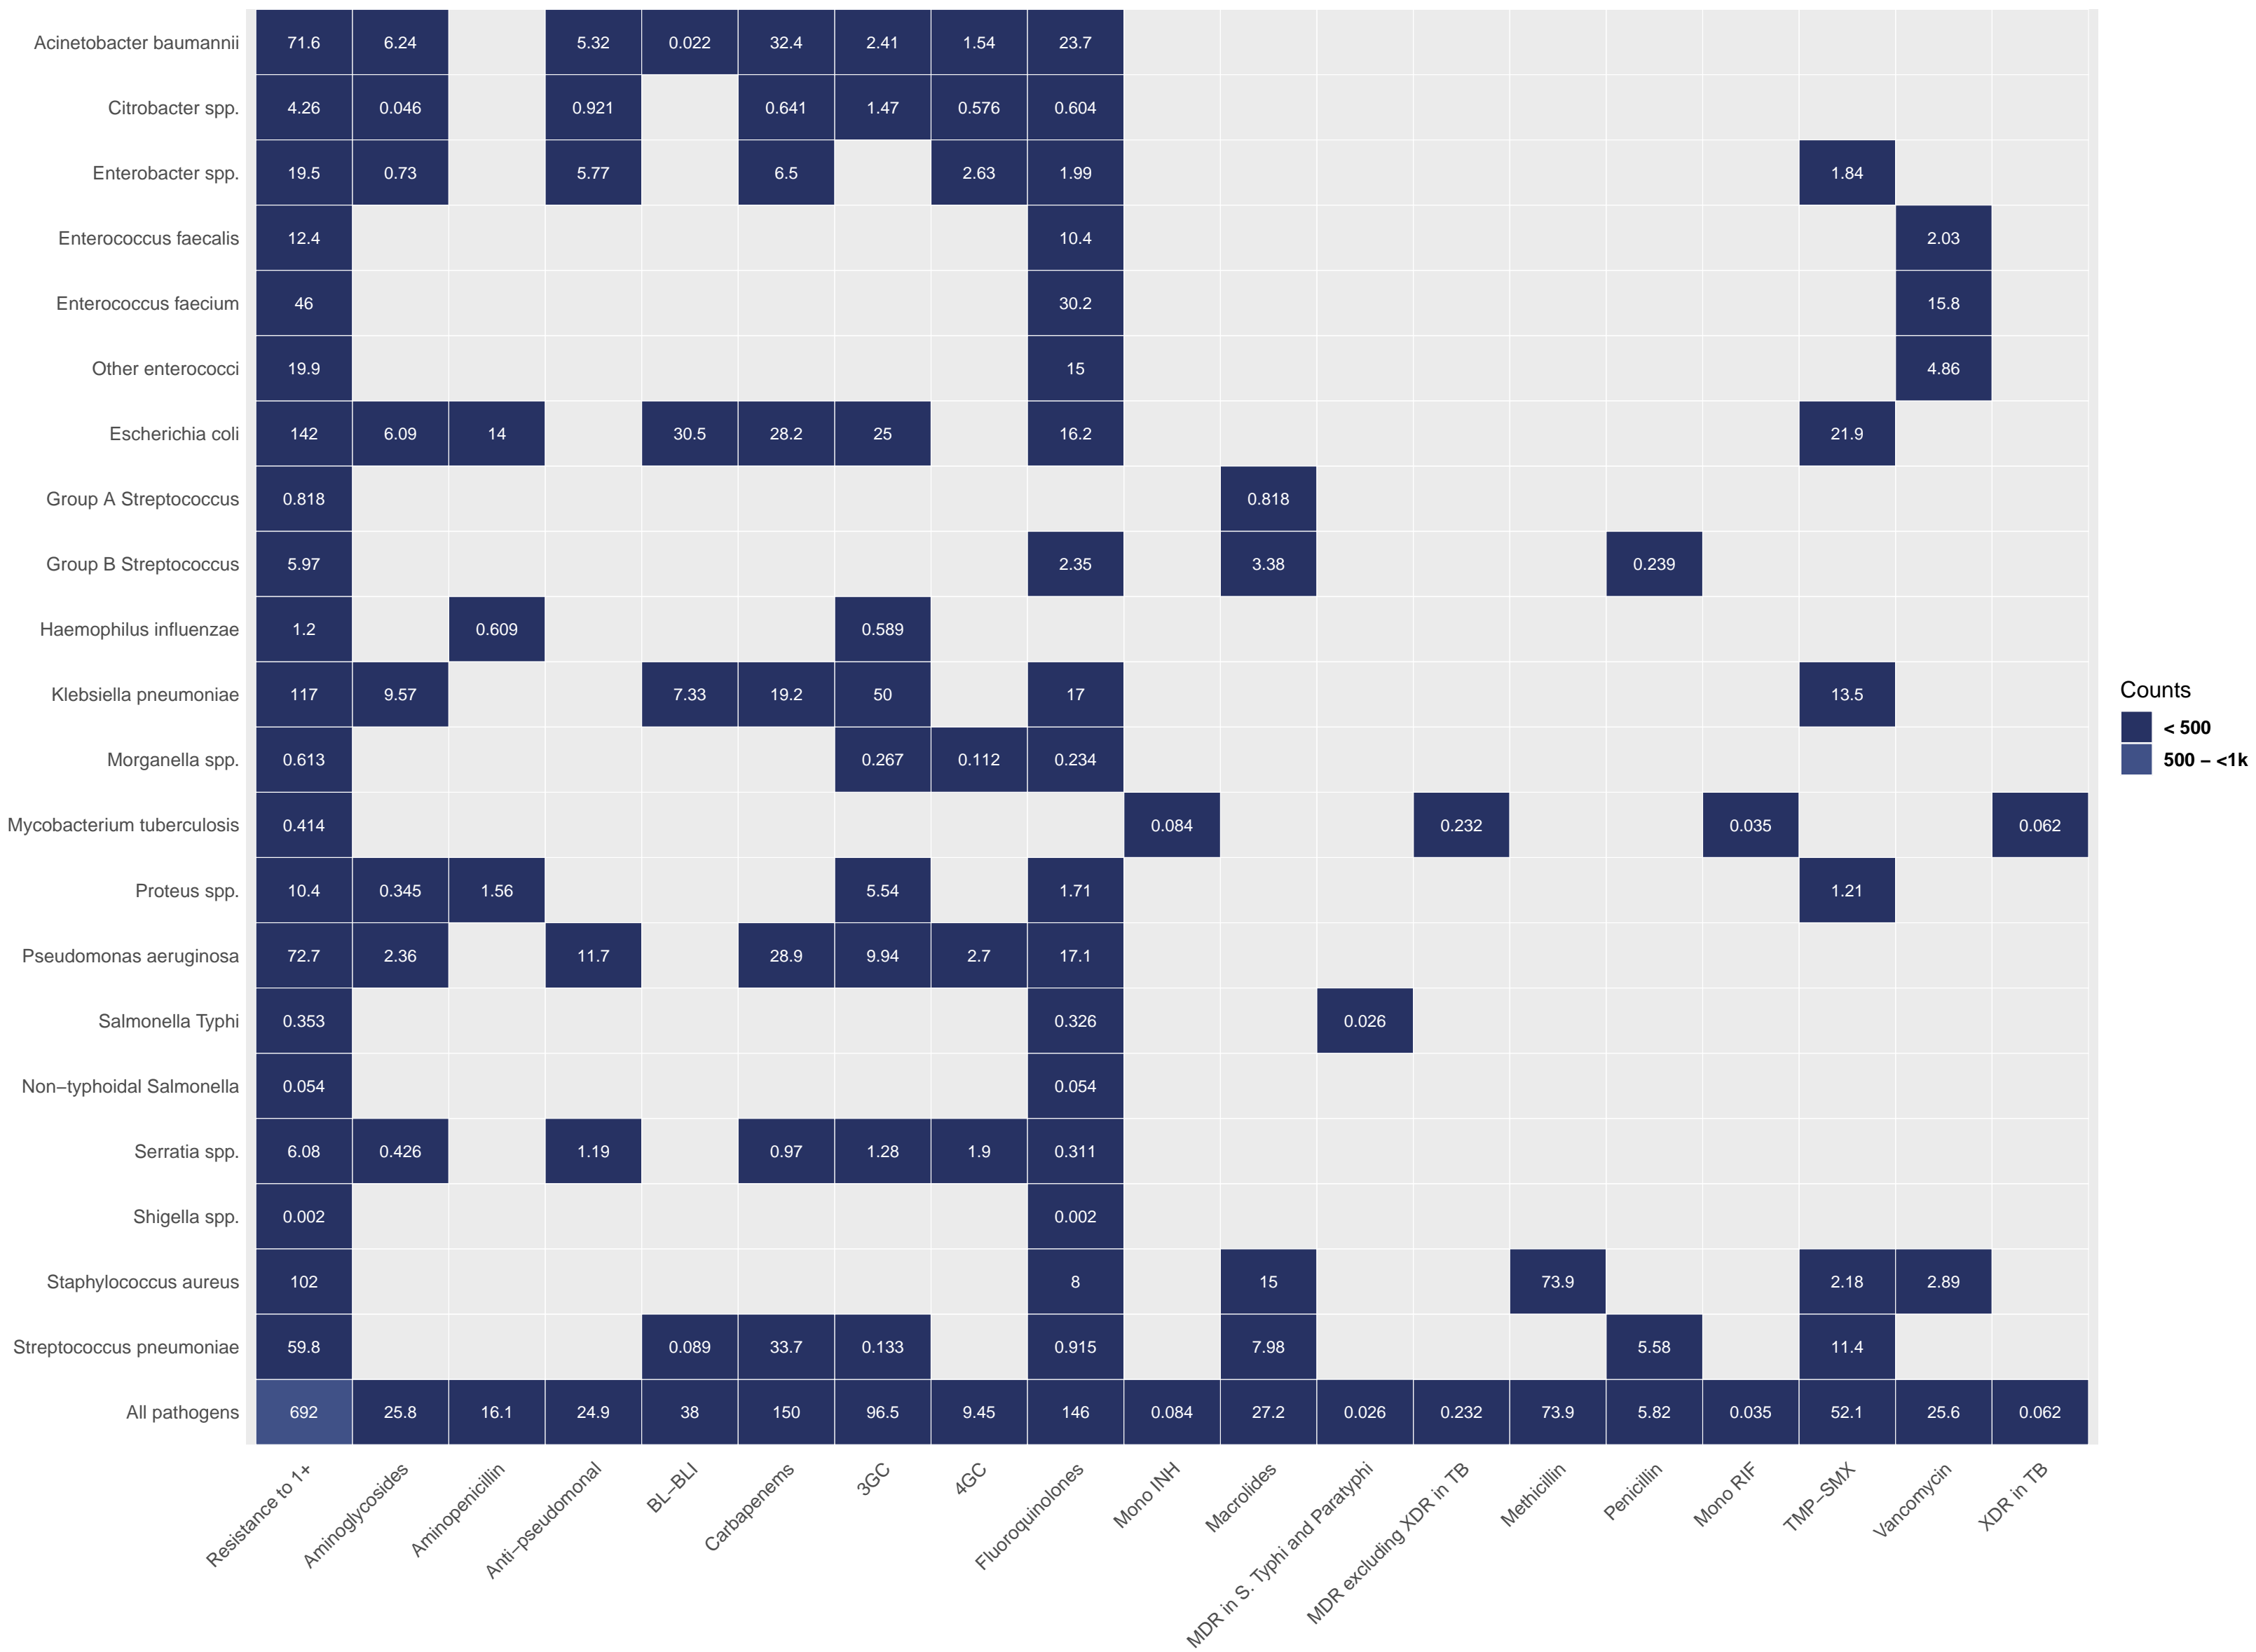

# Venezuela

Deaths (count) associated with bacterial antimicrobial resistance by pathogen–drug combinations, 2019

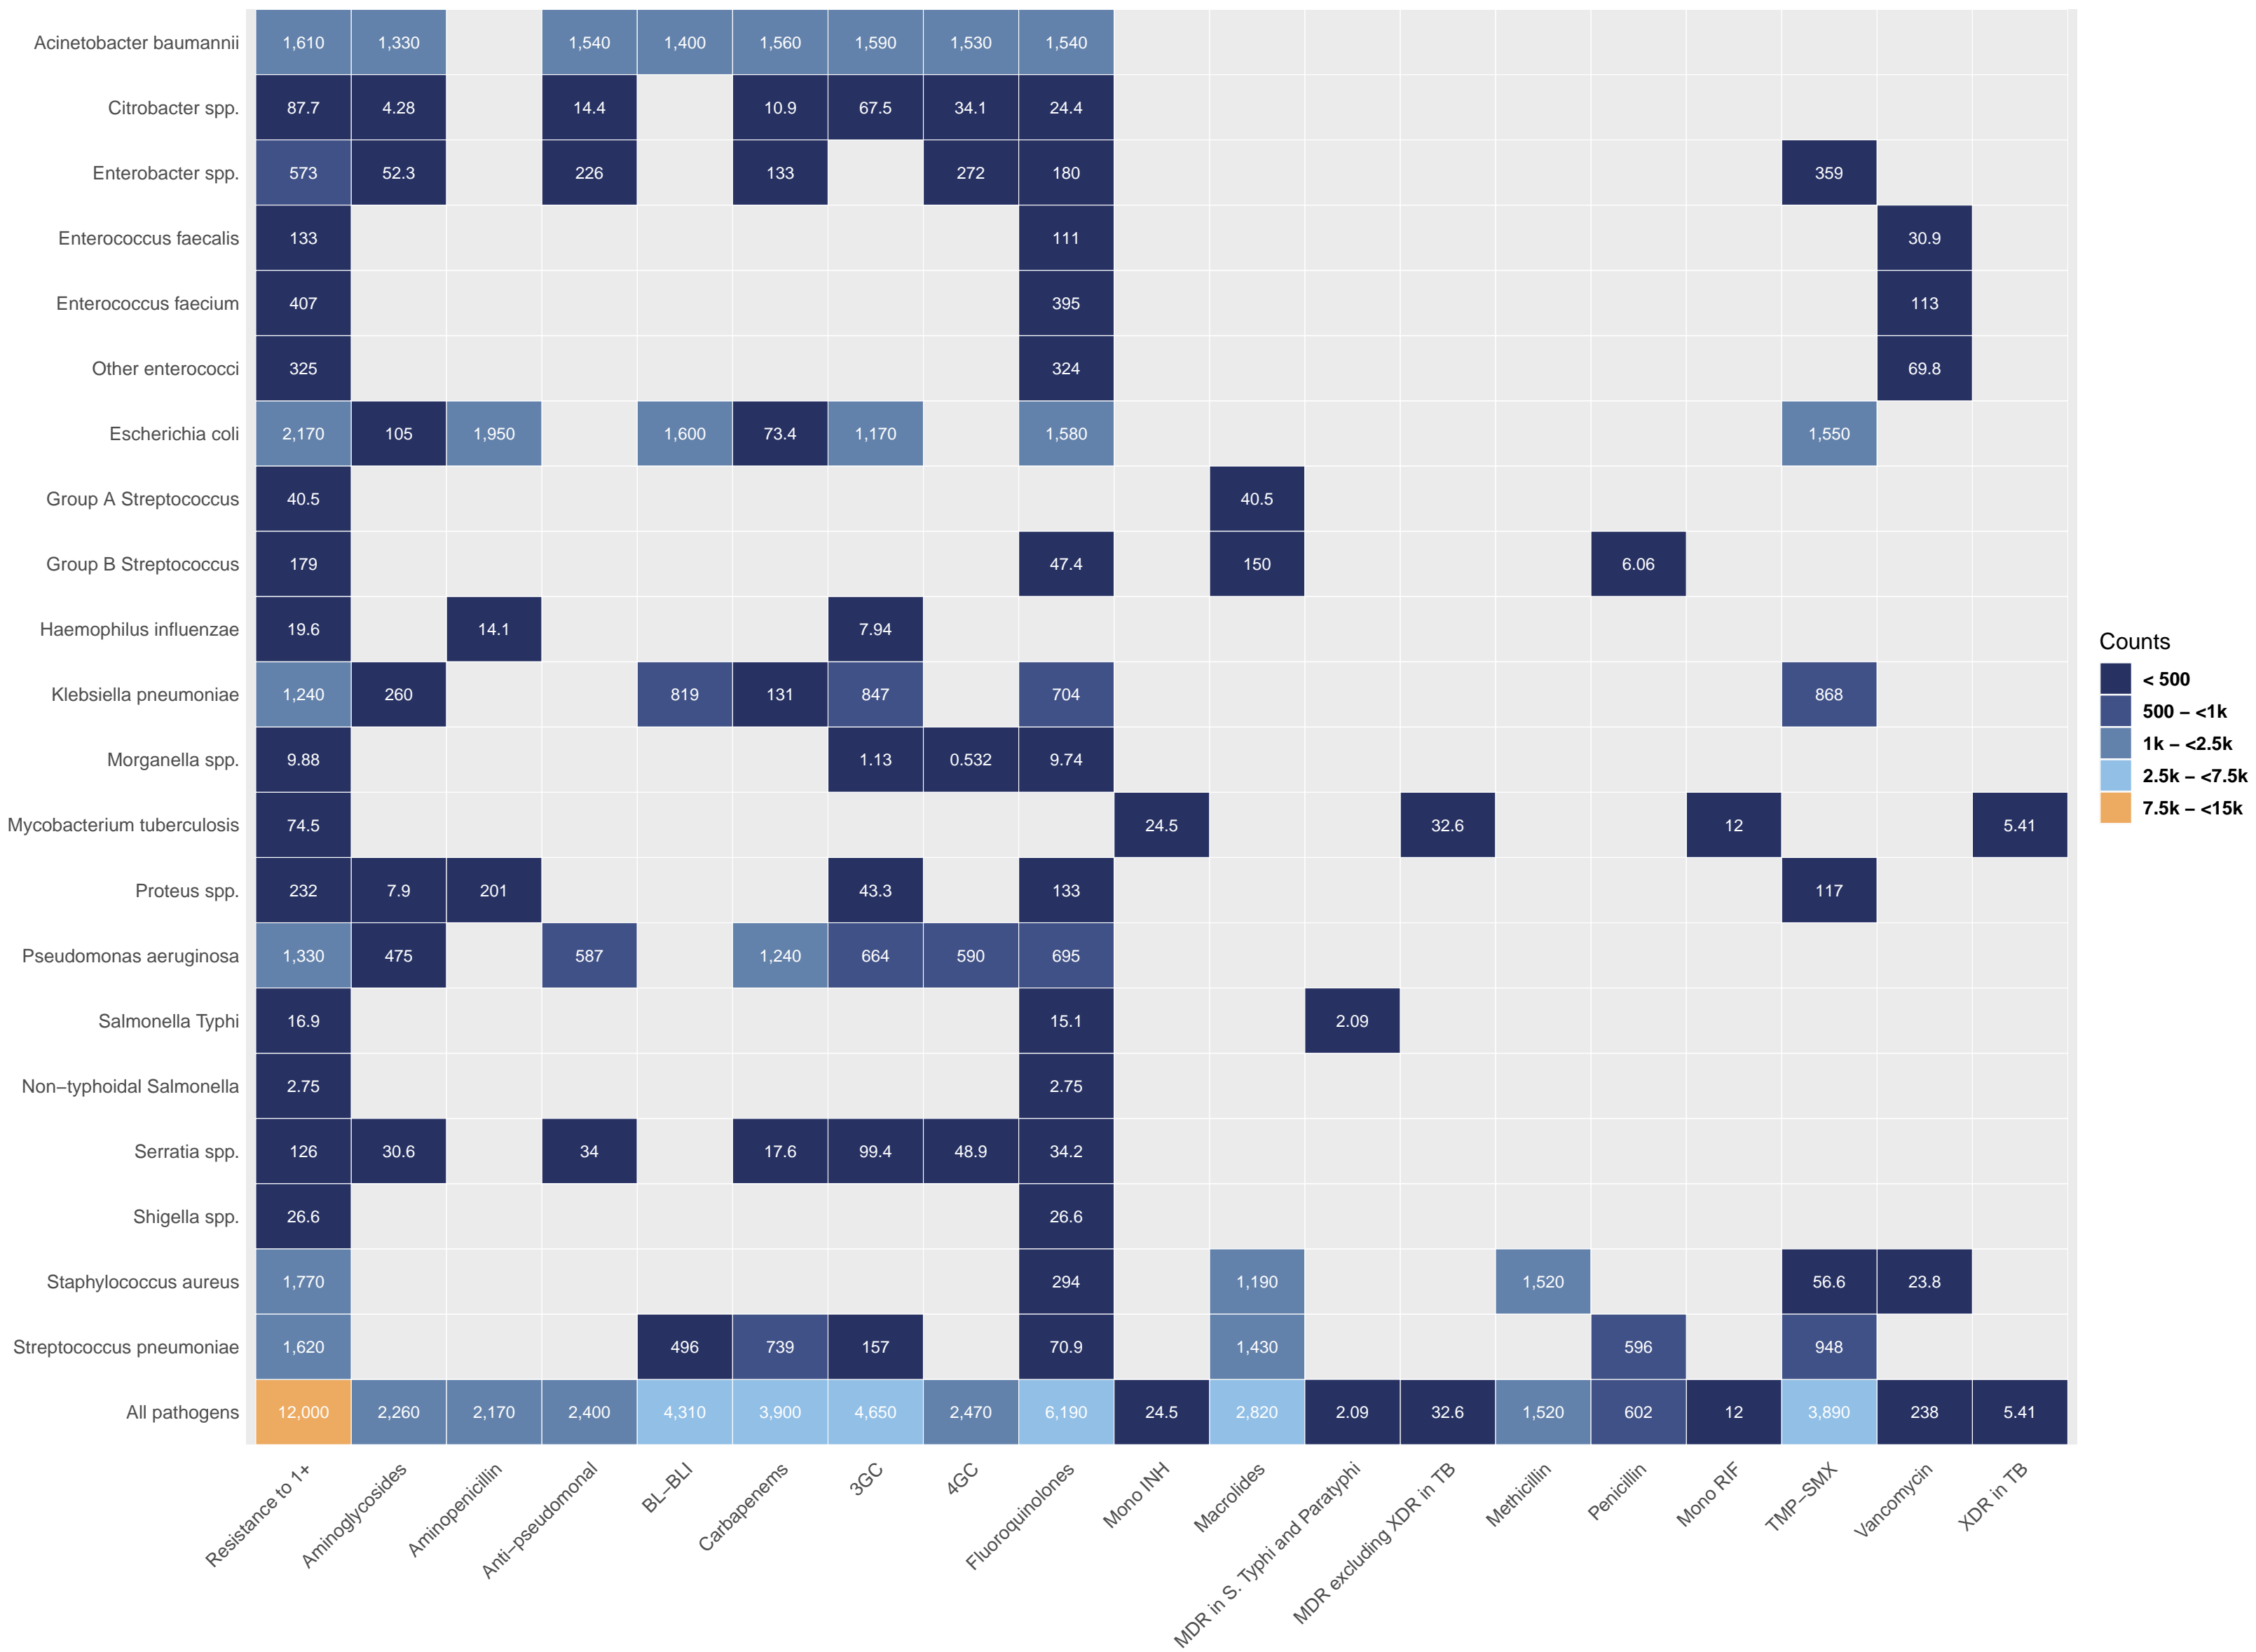

# Venezuela

Deaths (count) *attributable to* bacterial antimicrobial resistance by pathogen–drug combinations, 2019

|                            |                  |                 |                 |                  |        |             |       |       |                  |          |            |                               |                         |             |            |          |         |            |           |
|----------------------------|------------------|-----------------|-----------------|------------------|--------|-------------|-------|-------|------------------|----------|------------|-------------------------------|-------------------------|-------------|------------|----------|---------|------------|-----------|
| Acinetobacter baumannii    | 522              | 54.7            |                 | 3.72             | 0.146  | 260         | 11    | 1.42  | 191              |          |            |                               |                         |             |            |          |         |            |           |
| Citrobacter spp.           | 25               | 0.258           |                 | 3.61             |        | 2.85        | 9.73  | 4.64  | 3.91             |          |            |                               |                         |             |            |          |         |            |           |
| Enterobacter spp.          | 125              | 3.74            |                 | 26.1             |        | 34.2        |       | 16.6  | 20.6             |          |            |                               |                         |             |            | 24       |         |            |           |
| Enterococcus faecalis      | 38.7             |                 |                 |                  |        |             |       |       | 27.6             |          |            |                               |                         |             |            |          |         | 11.1       |           |
| Enterococcus faecium       | 105              |                 |                 |                  |        |             |       |       | 77.4             |          |            |                               |                         |             |            |          |         | 27.4       |           |
| Other enterococci          | 70.7             |                 |                 |                  |        |             |       |       | 59.2             |          |            |                               |                         |             |            |          |         | 11.5       |           |
| Escherichia coli           | 545              | 7.76            | 22.5            |                  | 66.4   | 16.6        | 159   |       | 183              |          |            |                               |                         |             |            |          | 89.5    |            |           |
| Group A Streptococcus      | 3.89             |                 |                 |                  |        |             |       |       |                  |          | 3.89       |                               |                         |             |            |          |         |            |           |
| Group B Streptococcus      | 25.2             |                 |                 |                  |        |             |       |       | 8.38             |          | 15.4       |                               |                         | 1.46        |            |          |         |            |           |
| Haemophilus influenzae     | 4.54             |                 | 2.19            |                  |        |             | 2.35  |       |                  |          |            |                               |                         |             |            |          |         |            |           |
| Klebsiella pneumoniae      | 312              | 23.2            |                 |                  | 22     | 36          | 123   |       | 55.7             |          |            |                               |                         |             |            |          | 52.2    |            |           |
| Morganella spp.            | 2.14             |                 |                 |                  |        |             | 0.16  | 0.081 | 1.9              |          |            |                               |                         |             |            |          |         |            |           |
| Mycobacterium tuberculosis | 29.8             |                 |                 |                  |        |             |       |       |                  | 3.86     |            |                               | 19.2                    |             |            | 3.35     |         |            | 3.32      |
| Proteus spp.               | 29.8             | 0.513           | 4.6             |                  |        |             | 9.72  |       | 10.7             |          |            |                               |                         |             |            |          | 4.22    |            |           |
| Pseudomonas aeruginosa     | 330              | 11.7            |                 | 3.34             |        | 231         | 13.8  | 1.59  | 68.4             |          |            |                               |                         |             |            |          |         |            |           |
| Salmonella Typhi           | 3.35             |                 |                 |                  |        |             |       |       | 3.08             |          |            | 0.269                         |                         |             |            |          |         |            |           |
| Non-typhoidal Salmonella   | 0.582            |                 |                 |                  |        |             |       |       | 0.582            |          |            |                               |                         |             |            |          |         |            |           |
| Serratia spp.              | 33.1             | 1.79            |                 | 7.5              |        | 4.72        | 10    | 5.33  | 3.72             |          |            |                               |                         |             |            |          |         |            |           |
| Shigella spp.              | 5.5              |                 |                 |                  |        |             |       |       | 5.5              |          |            |                               |                         |             |            |          |         |            |           |
| Staphylococcus aureus      | 507              |                 |                 |                  |        |             |       |       | 15.6             |          | 47.5       |                               | 433                     |             |            |          | 4.73    | 6.56       |           |
| Streptococcus pneumoniae   | 334              |                 |                 |                  | 9.9    | 163         | 0.678 |       | 7.48             |          | 60.9       |                               |                         | 19.6        |            |          | 73.1    |            |           |
| All pathogens              | 3,050            | 104             | 29.3            | 44.3             | 98.4   | 748         | 340   | 29.7  | 743              | 3.86     | 128        | 0.269                         | 19.2                    | 433         | 21.1       | 3.35     | 248     | 56.6       | 3.32      |
|                            | Resistance to 1+ | Aminoglycosides | Aminopenicillin | Anti-pseudomonal | BL-BLI | Carbapenems | 3GC   | 4GC   | Fluoroquinolones | Mono INH | Macrolides | MDR in S. Typhi and Paratyphi | MDR excluding XDR in TB | Methicillin | Penicillin | Mono RIF | TMP-SMX | Vancomycin | XDR in TB |



**DALYs**

# Andean Latin America

DALYs (count) associated with bacterial antimicrobial resistance by pathogen–drug combinations, 2019

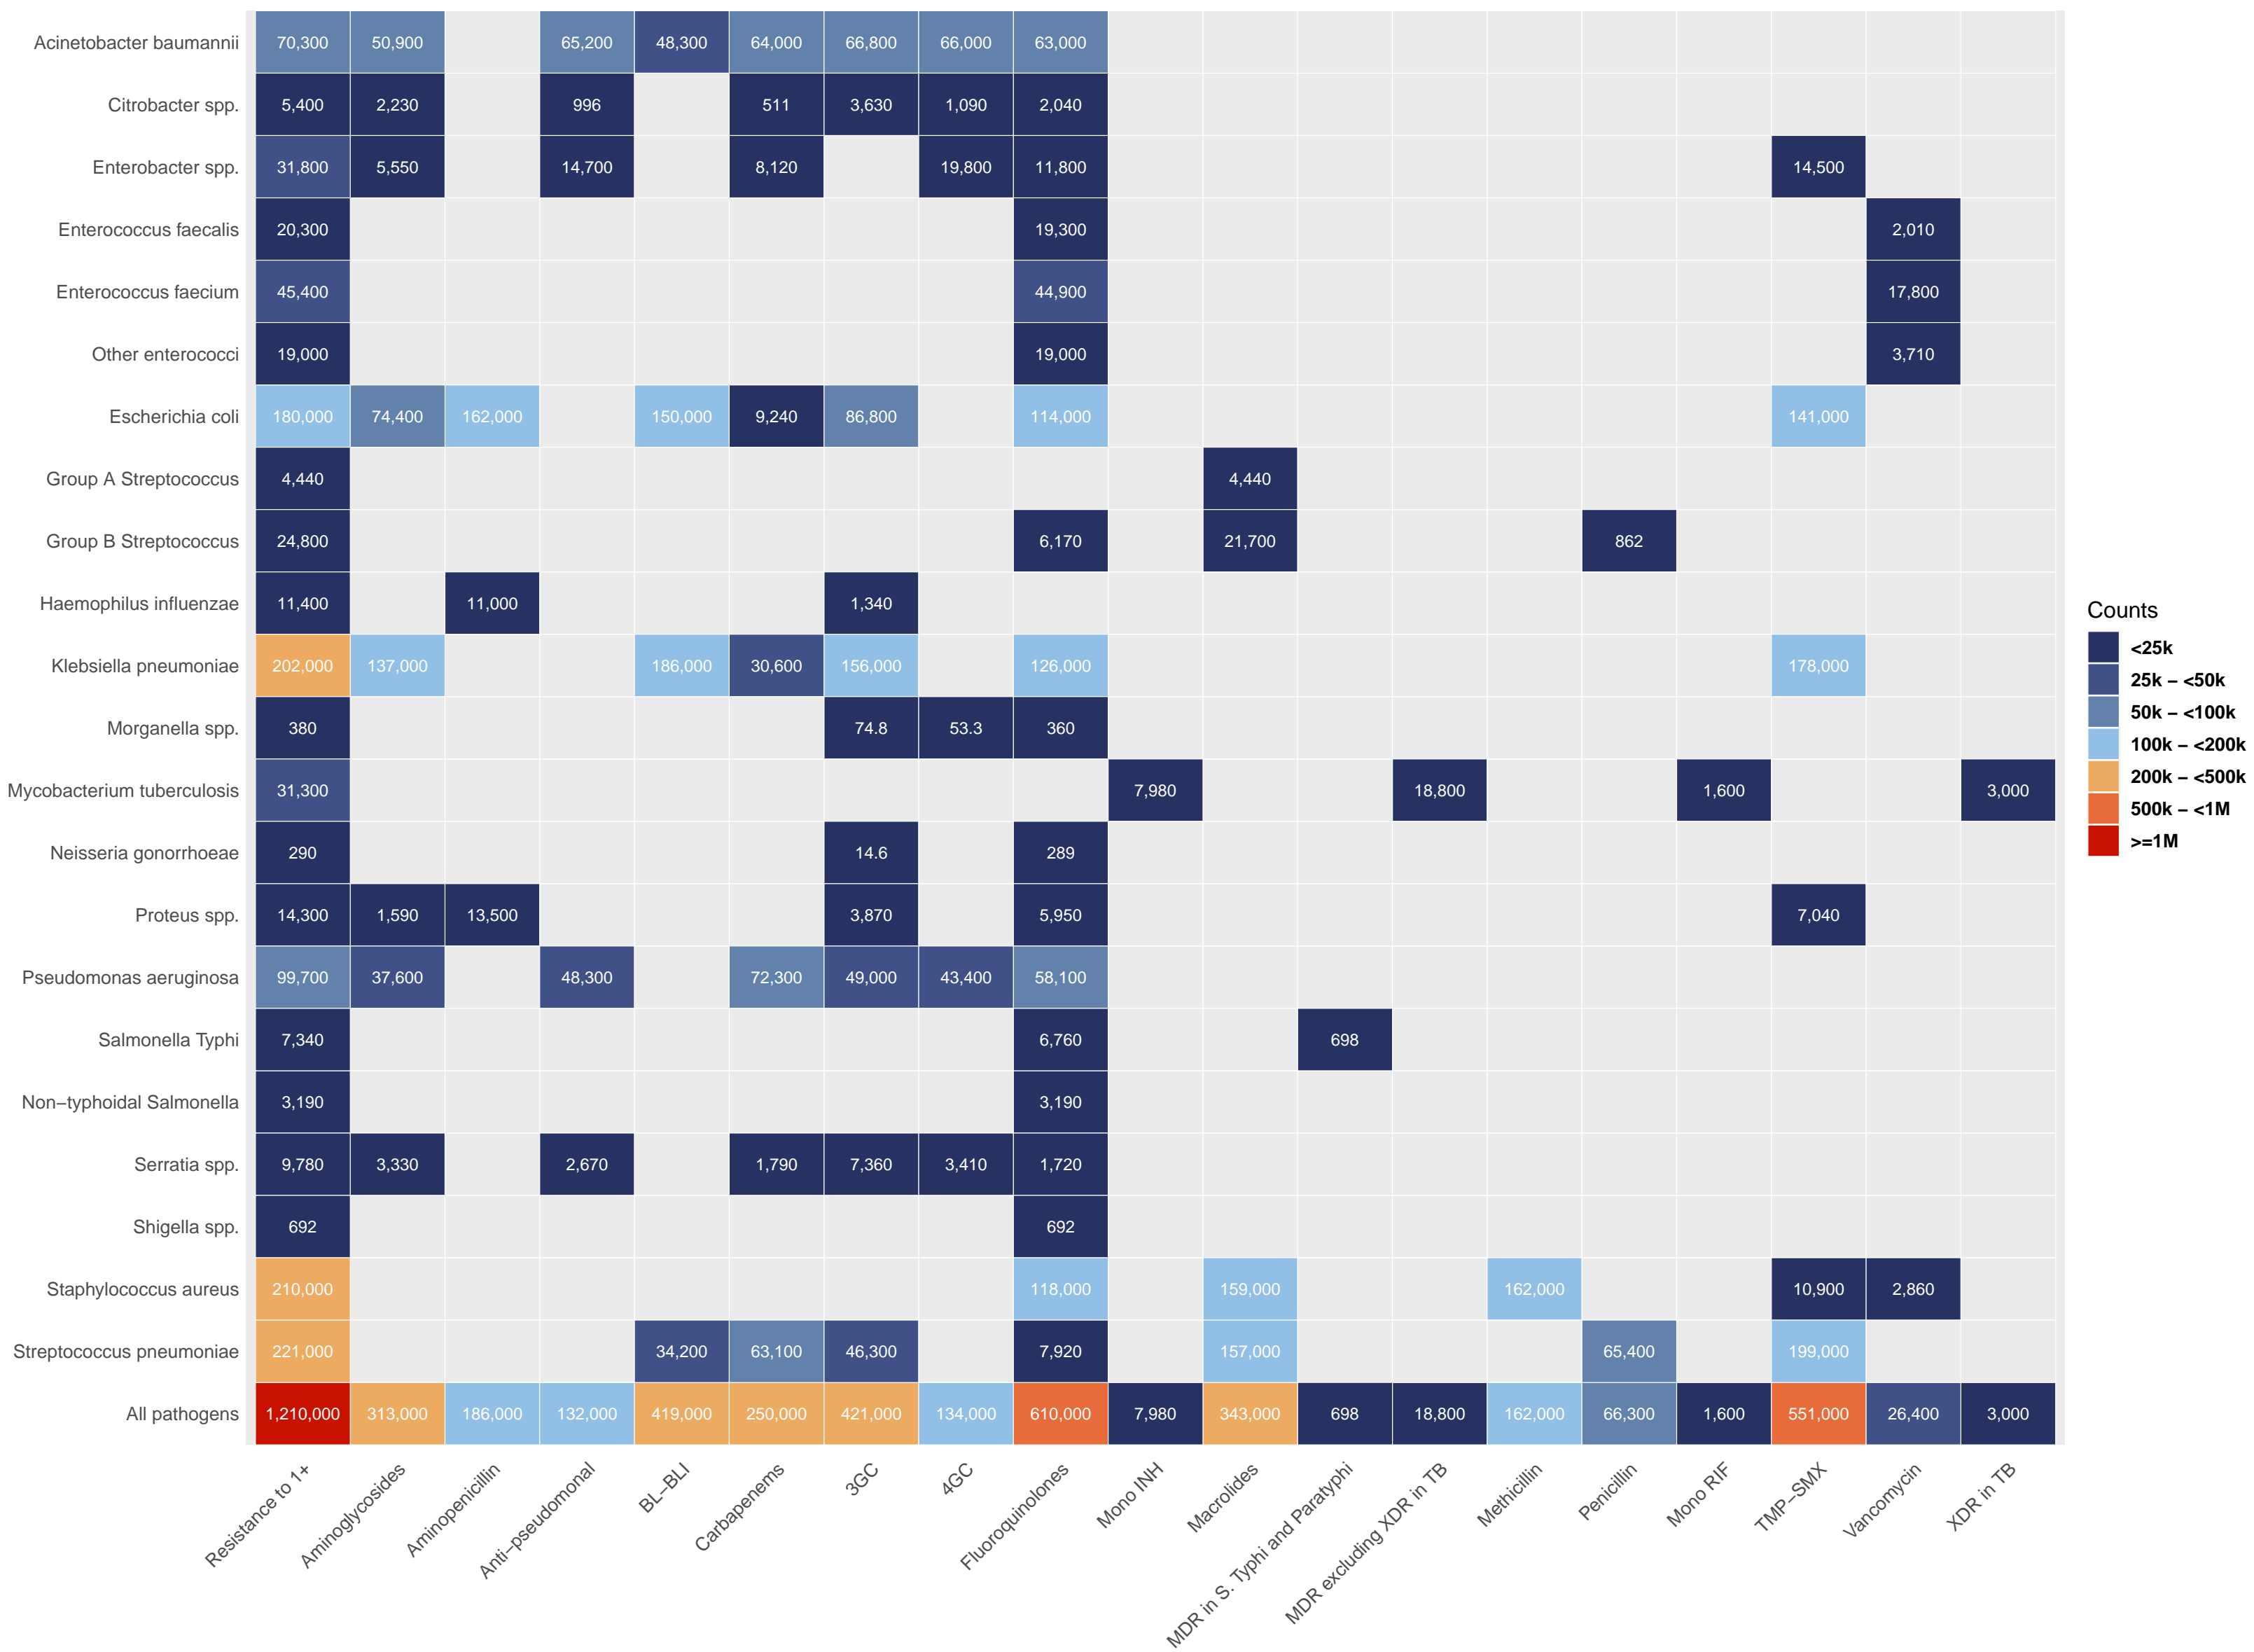

# Andean Latin America

DALYs (count) *attributable* to bacterial antimicrobial resistance by pathogen–drug combinations, 2019

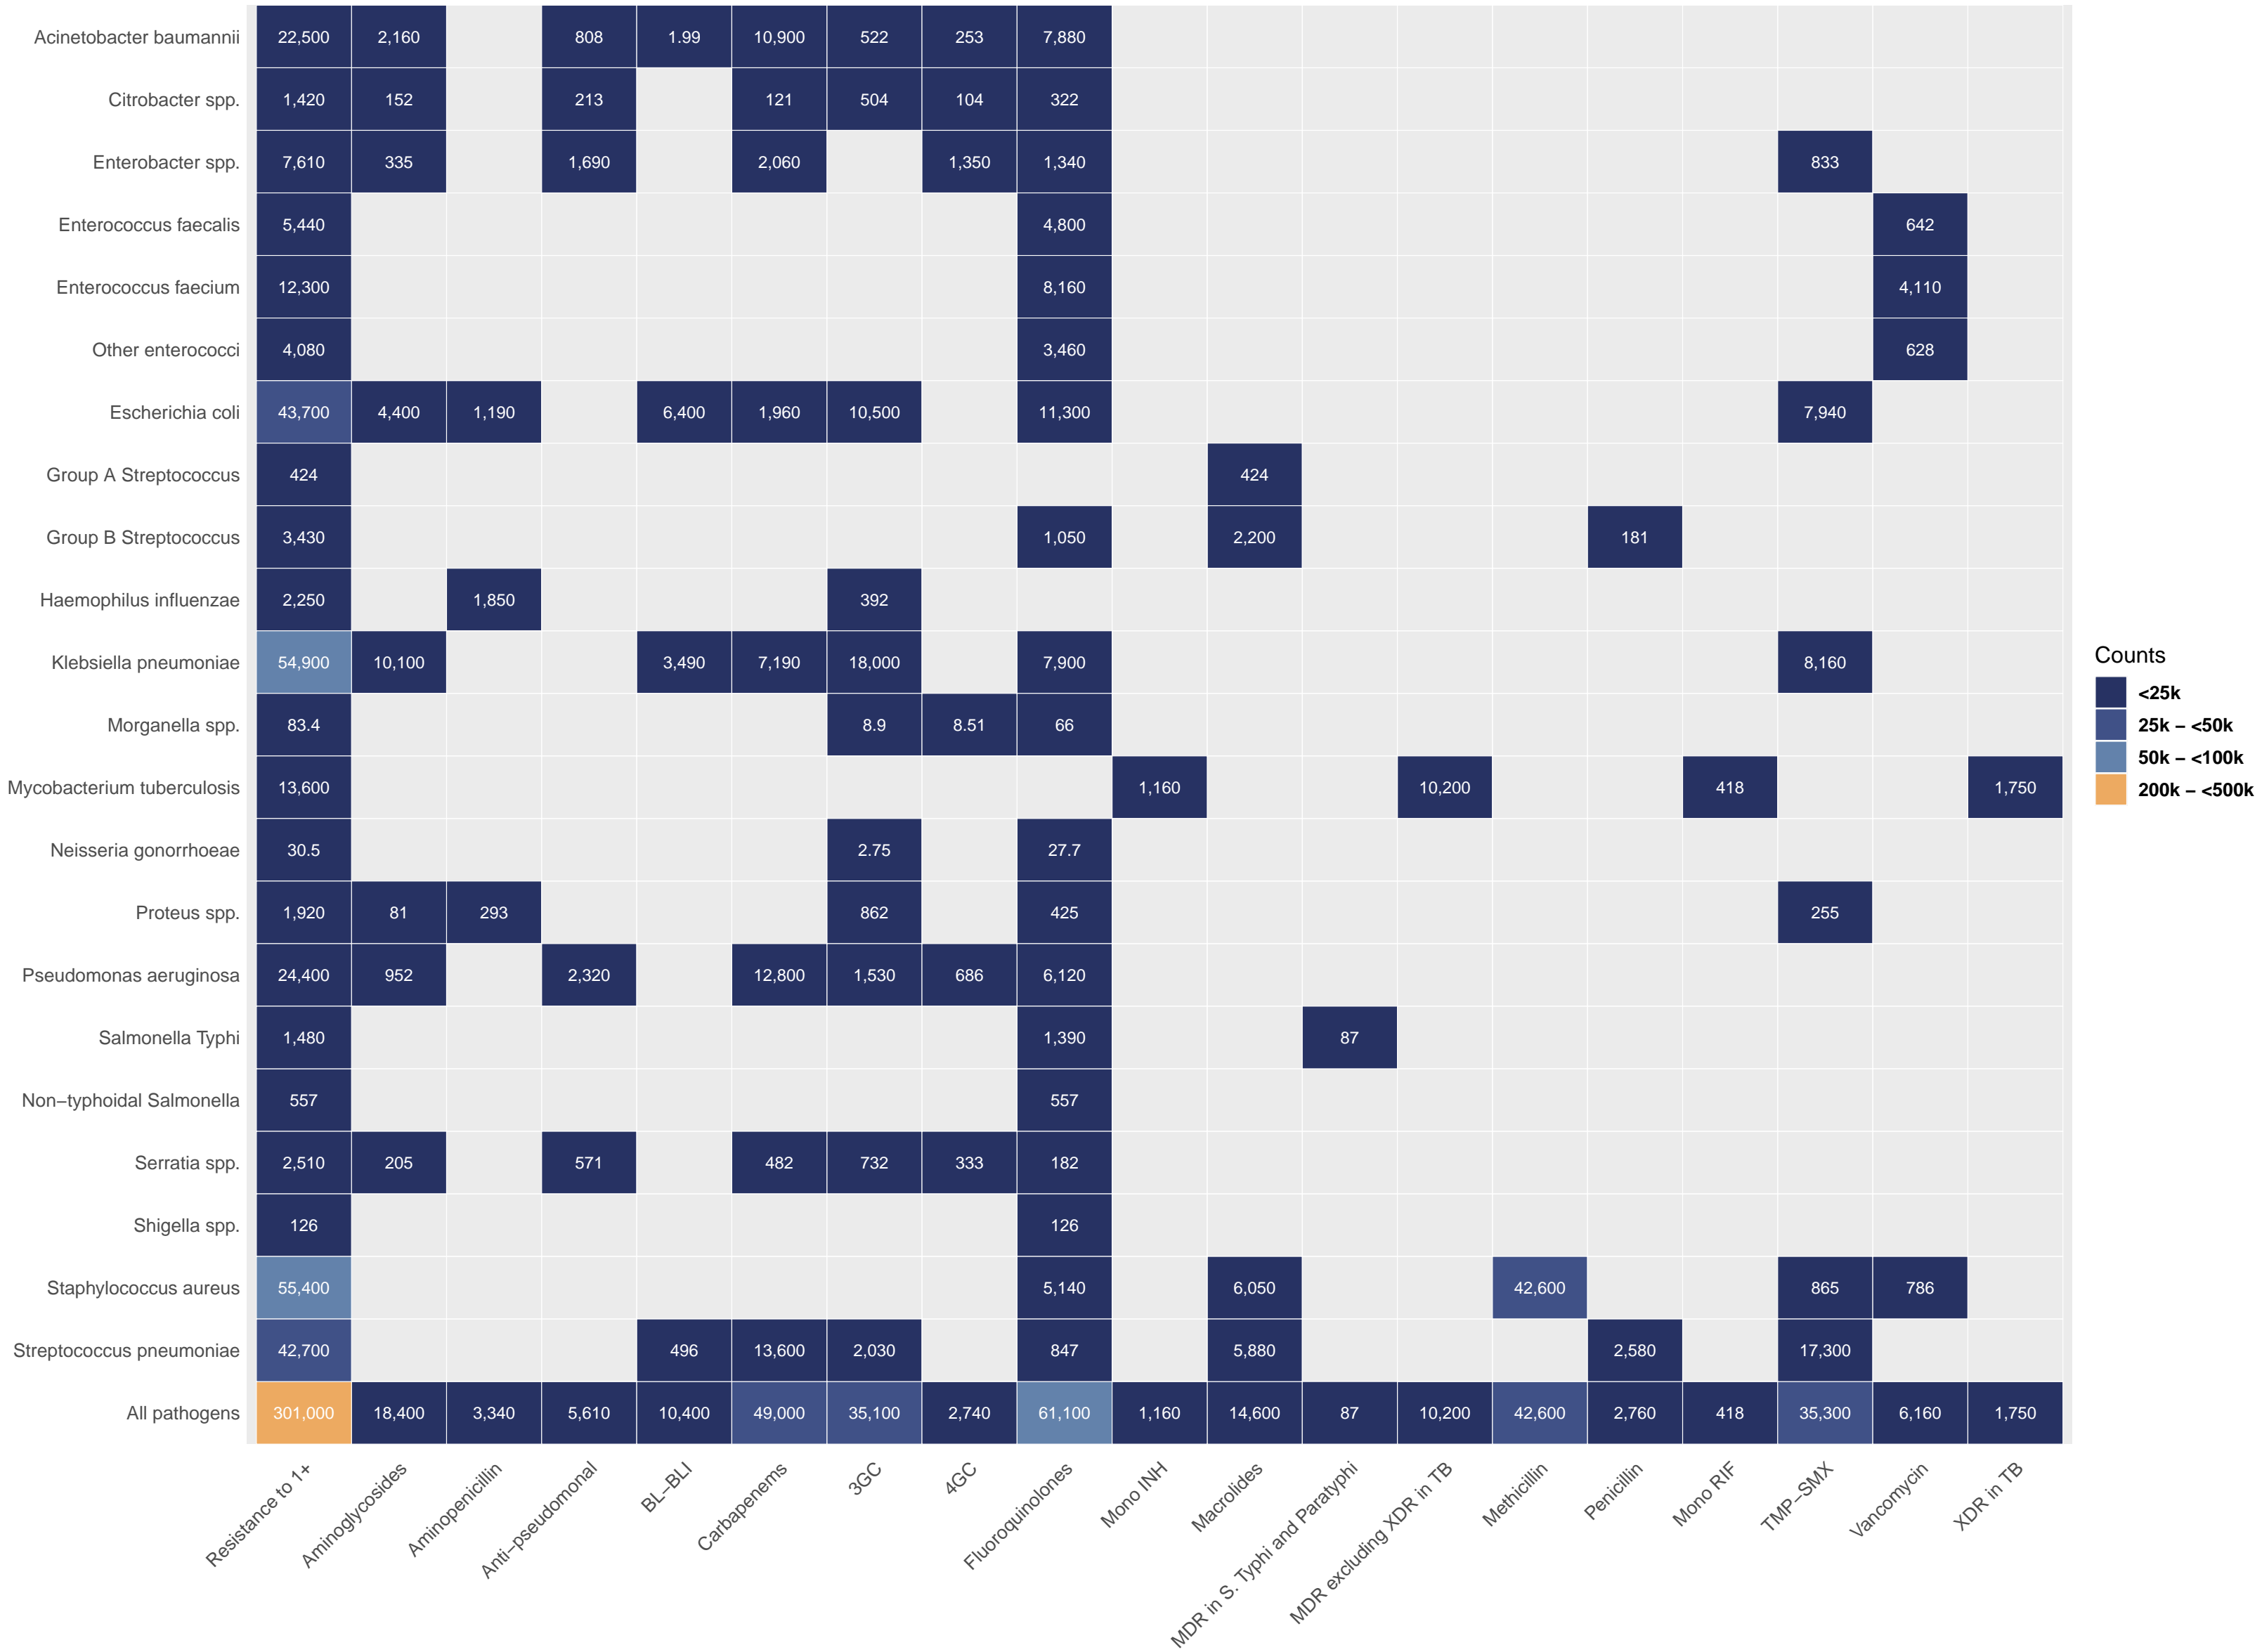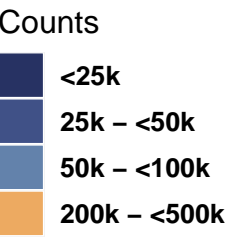

# Caribbean

DALYs (count) associated with bacterial antimicrobial resistance by pathogen–drug combinations, 2019

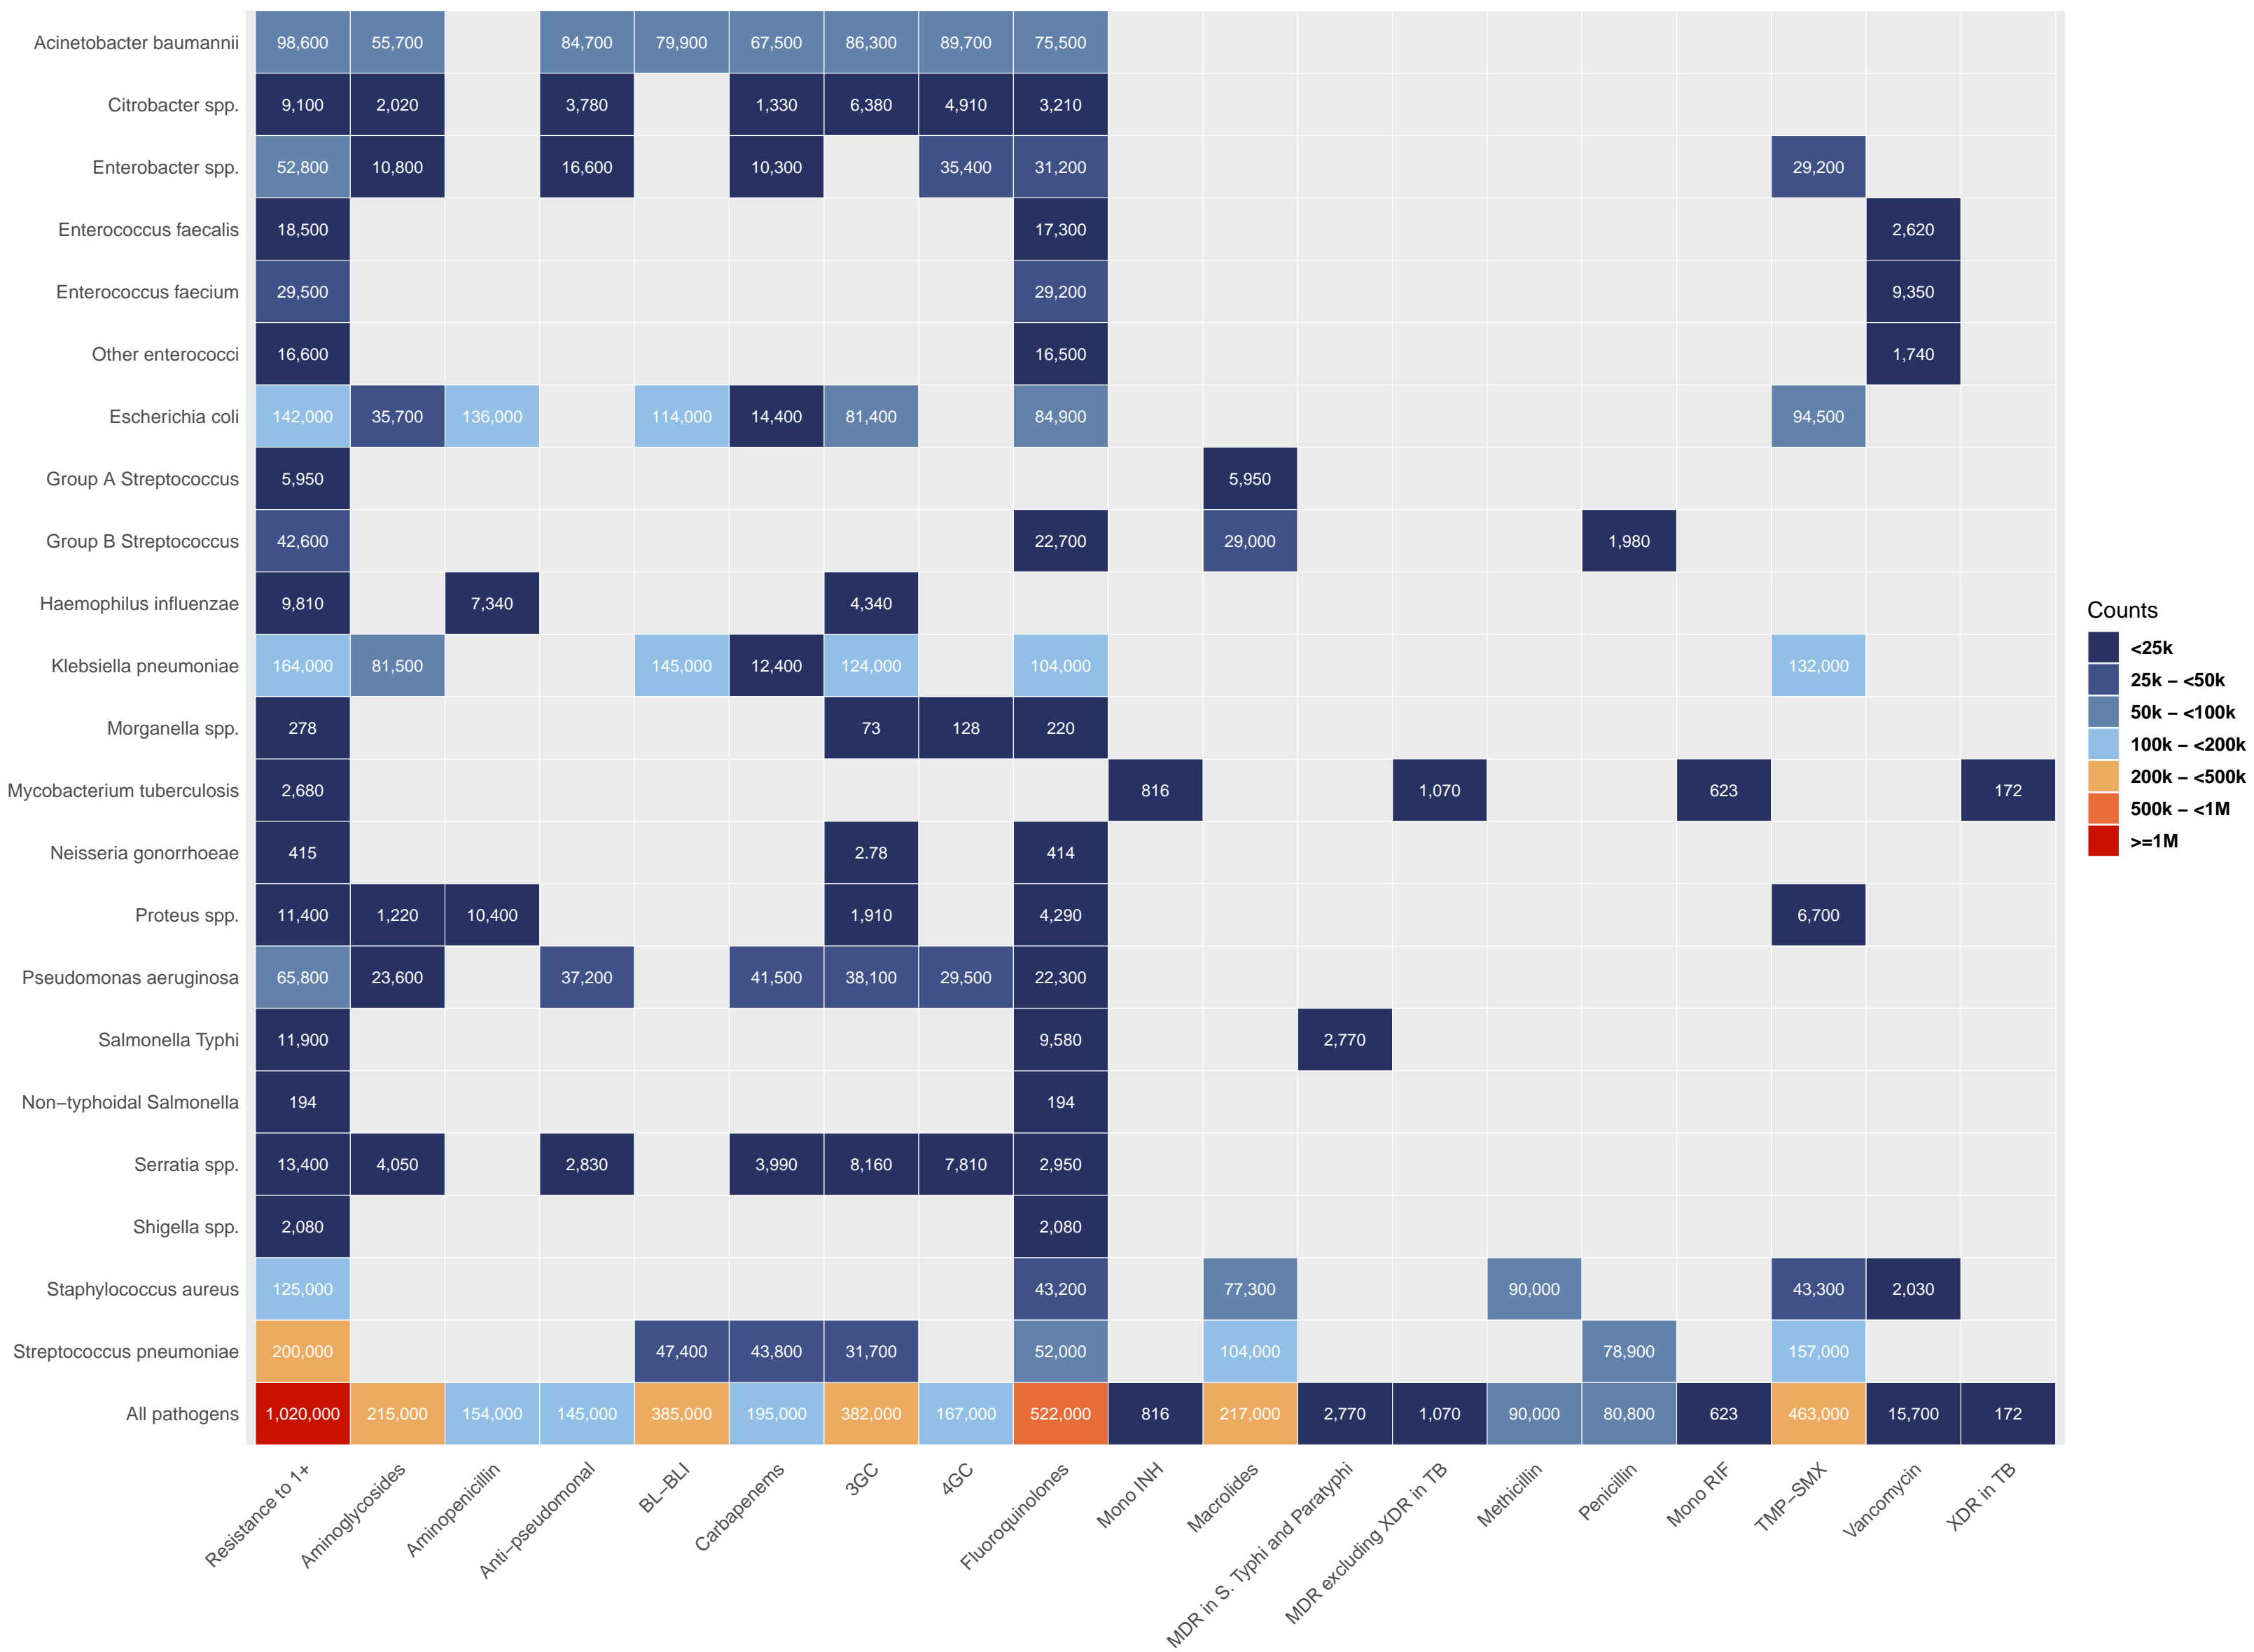

# Caribbean

DALYs (count) *attributable* to bacterial antimicrobial resistance by pathogen–drug combinations, 2019

|                            |                  |                 |                 |                  |        |             |        |       |                  |          |            |                               |                         |             |            |          |         |            |           |
|----------------------------|------------------|-----------------|-----------------|------------------|--------|-------------|--------|-------|------------------|----------|------------|-------------------------------|-------------------------|-------------|------------|----------|---------|------------|-----------|
| Acinetobacter baumannii    | 30,600           | 2,450           |                 | 4,620            | 257    | 11,400      | 1,240  | 1,060 | 9,600            |          |            |                               |                         |             |            |          |         |            |           |
| Citrobacter spp.           | 2,590            | 117             |                 | 749              |        | 327         | 440    | 486   | 468              |          |            |                               |                         |             |            |          |         |            |           |
| Enterobacter spp.          | 12,500           | 596             |                 | 1,540            |        | 2,300       |        | 2,780 | 3,770            |          |            |                               |                         |             |            |          | 1,530   |            |           |
| Enterococcus faecalis      | 5,070            |                 |                 |                  |        |             |        |       | 4,240            |          |            |                               |                         |             |            |          |         | 821        |           |
| Enterococcus faecium       | 7,680            |                 |                 |                  |        |             |        |       | 5,500            |          |            |                               |                         |             |            |          |         | 2,180      |           |
| Other enterococci          | 3,450            |                 |                 |                  |        |             |        |       | 3,140            |          |            |                               |                         |             |            |          |         | 316        |           |
| Escherichia coli           | 36,200           | 2,110           | 1,460           |                  | 4,790  | 3,060       | 10,800 |       | 8,650            |          |            |                               |                         |             |            |          | 5,330   |            |           |
| Group A Streptococcus      | 570              |                 |                 |                  |        |             |        |       |                  |          | 570        |                               |                         |             |            |          |         |            |           |
| Group B Streptococcus      | 7,090            |                 |                 |                  |        |             |        |       | 4,050            |          | 2,690      |                               |                         |             | 353        |          |         |            |           |
| Haemophilus influenzae     | 2,290            |                 | 1,040           |                  |        |             |        | 1,260 |                  |          |            |                               |                         |             |            |          |         |            |           |
| Klebsiella pneumoniae      | 42,700           | 5,940           |                 |                  | 3,320  | 3,220       | 17,000 |       | 6,850            |          |            |                               |                         |             |            |          | 6,360   |            |           |
| Morganella spp.            | 64.5             |                 |                 |                  |        |             |        | 5.72  | 21.7             | 37       |            |                               |                         |             |            |          |         |            |           |
| Mycobacterium tuberculosis | 979              |                 |                 |                  |        |             |        |       |                  | 122      |            |                               |                         | 591         |            | 166      |         |            | 101       |
| Neisseria gonorrhoeae      | 40.7             |                 |                 |                  |        |             |        | 0.822 |                  | 39.8     |            |                               |                         |             |            |          |         |            |           |
| Proteus spp.               | 1,330            | 63              | 248             |                  |        |             |        | 451   |                  | 308      |            |                               |                         |             |            |          |         | 257        |           |
| Pseudomonas aeruginosa     | 16,500           | 684             |                 | 3,290            |        | 8,150       | 1,480  | 514   | 2,360            |          |            |                               |                         |             |            |          |         |            |           |
| Salmonella Typhi           | 2,300            |                 |                 |                  |        |             |        |       | 1,960            |          |            |                               | 347                     |             |            |          |         |            |           |
| Non-typhoidal Salmonella   | 37.2             |                 |                 |                  |        |             |        |       | 37.2             |          |            |                               |                         |             |            |          |         |            |           |
| Serratia spp.              | 3,490            | 231             |                 | 513              |        | 1,070       | 562    | 815   | 306              |          |            |                               |                         |             |            |          |         |            |           |
| Shigella spp.              | 423              |                 |                 |                  |        |             |        |       | 423              |          |            |                               |                         |             |            |          |         |            |           |
| Staphylococcus aureus      | 32,600           |                 |                 |                  |        |             |        |       | 1,870            |          | 2,860      |                               |                         | 23,200      |            |          | 4,170   | 523        |           |
| Streptococcus pneumoniae   | 40,300           |                 |                 |                  | 1,370  | 9,040       | 1,650  |       | 6,470            |          | 3,900      |                               |                         | 4,820       |            |          | 13,000  |            |           |
| All pathogens              | 249,000          | 12,200          | 2,750           | 10,700           | 9,740  | 38,600      | 34,900 | 5,680 | 60,100           | 122      | 10,000     | 347                           | 591                     | 23,200      | 5,180      | 166      | 30,700  | 3,840      | 101       |
|                            | Resistance to 1+ | Aminoglycosides | Aminopenicillin | Anti-pseudomonal | BL-BLI | Carbapenems | 3GC    | 4GC   | Fluoroquinolones | Mono INH | Macrolides | MDR in S. Typhi and Paratyphi | MDR excluding XDR in TB | Methicillin | Penicillin | Mono RIF | TMP-SMX | Vancomycin | XDR in TB |

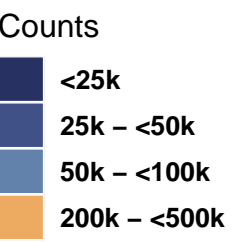



# Central Latin America

DALYs (count) associated with bacterial antimicrobial resistance by pathogen–drug combinations, 2019

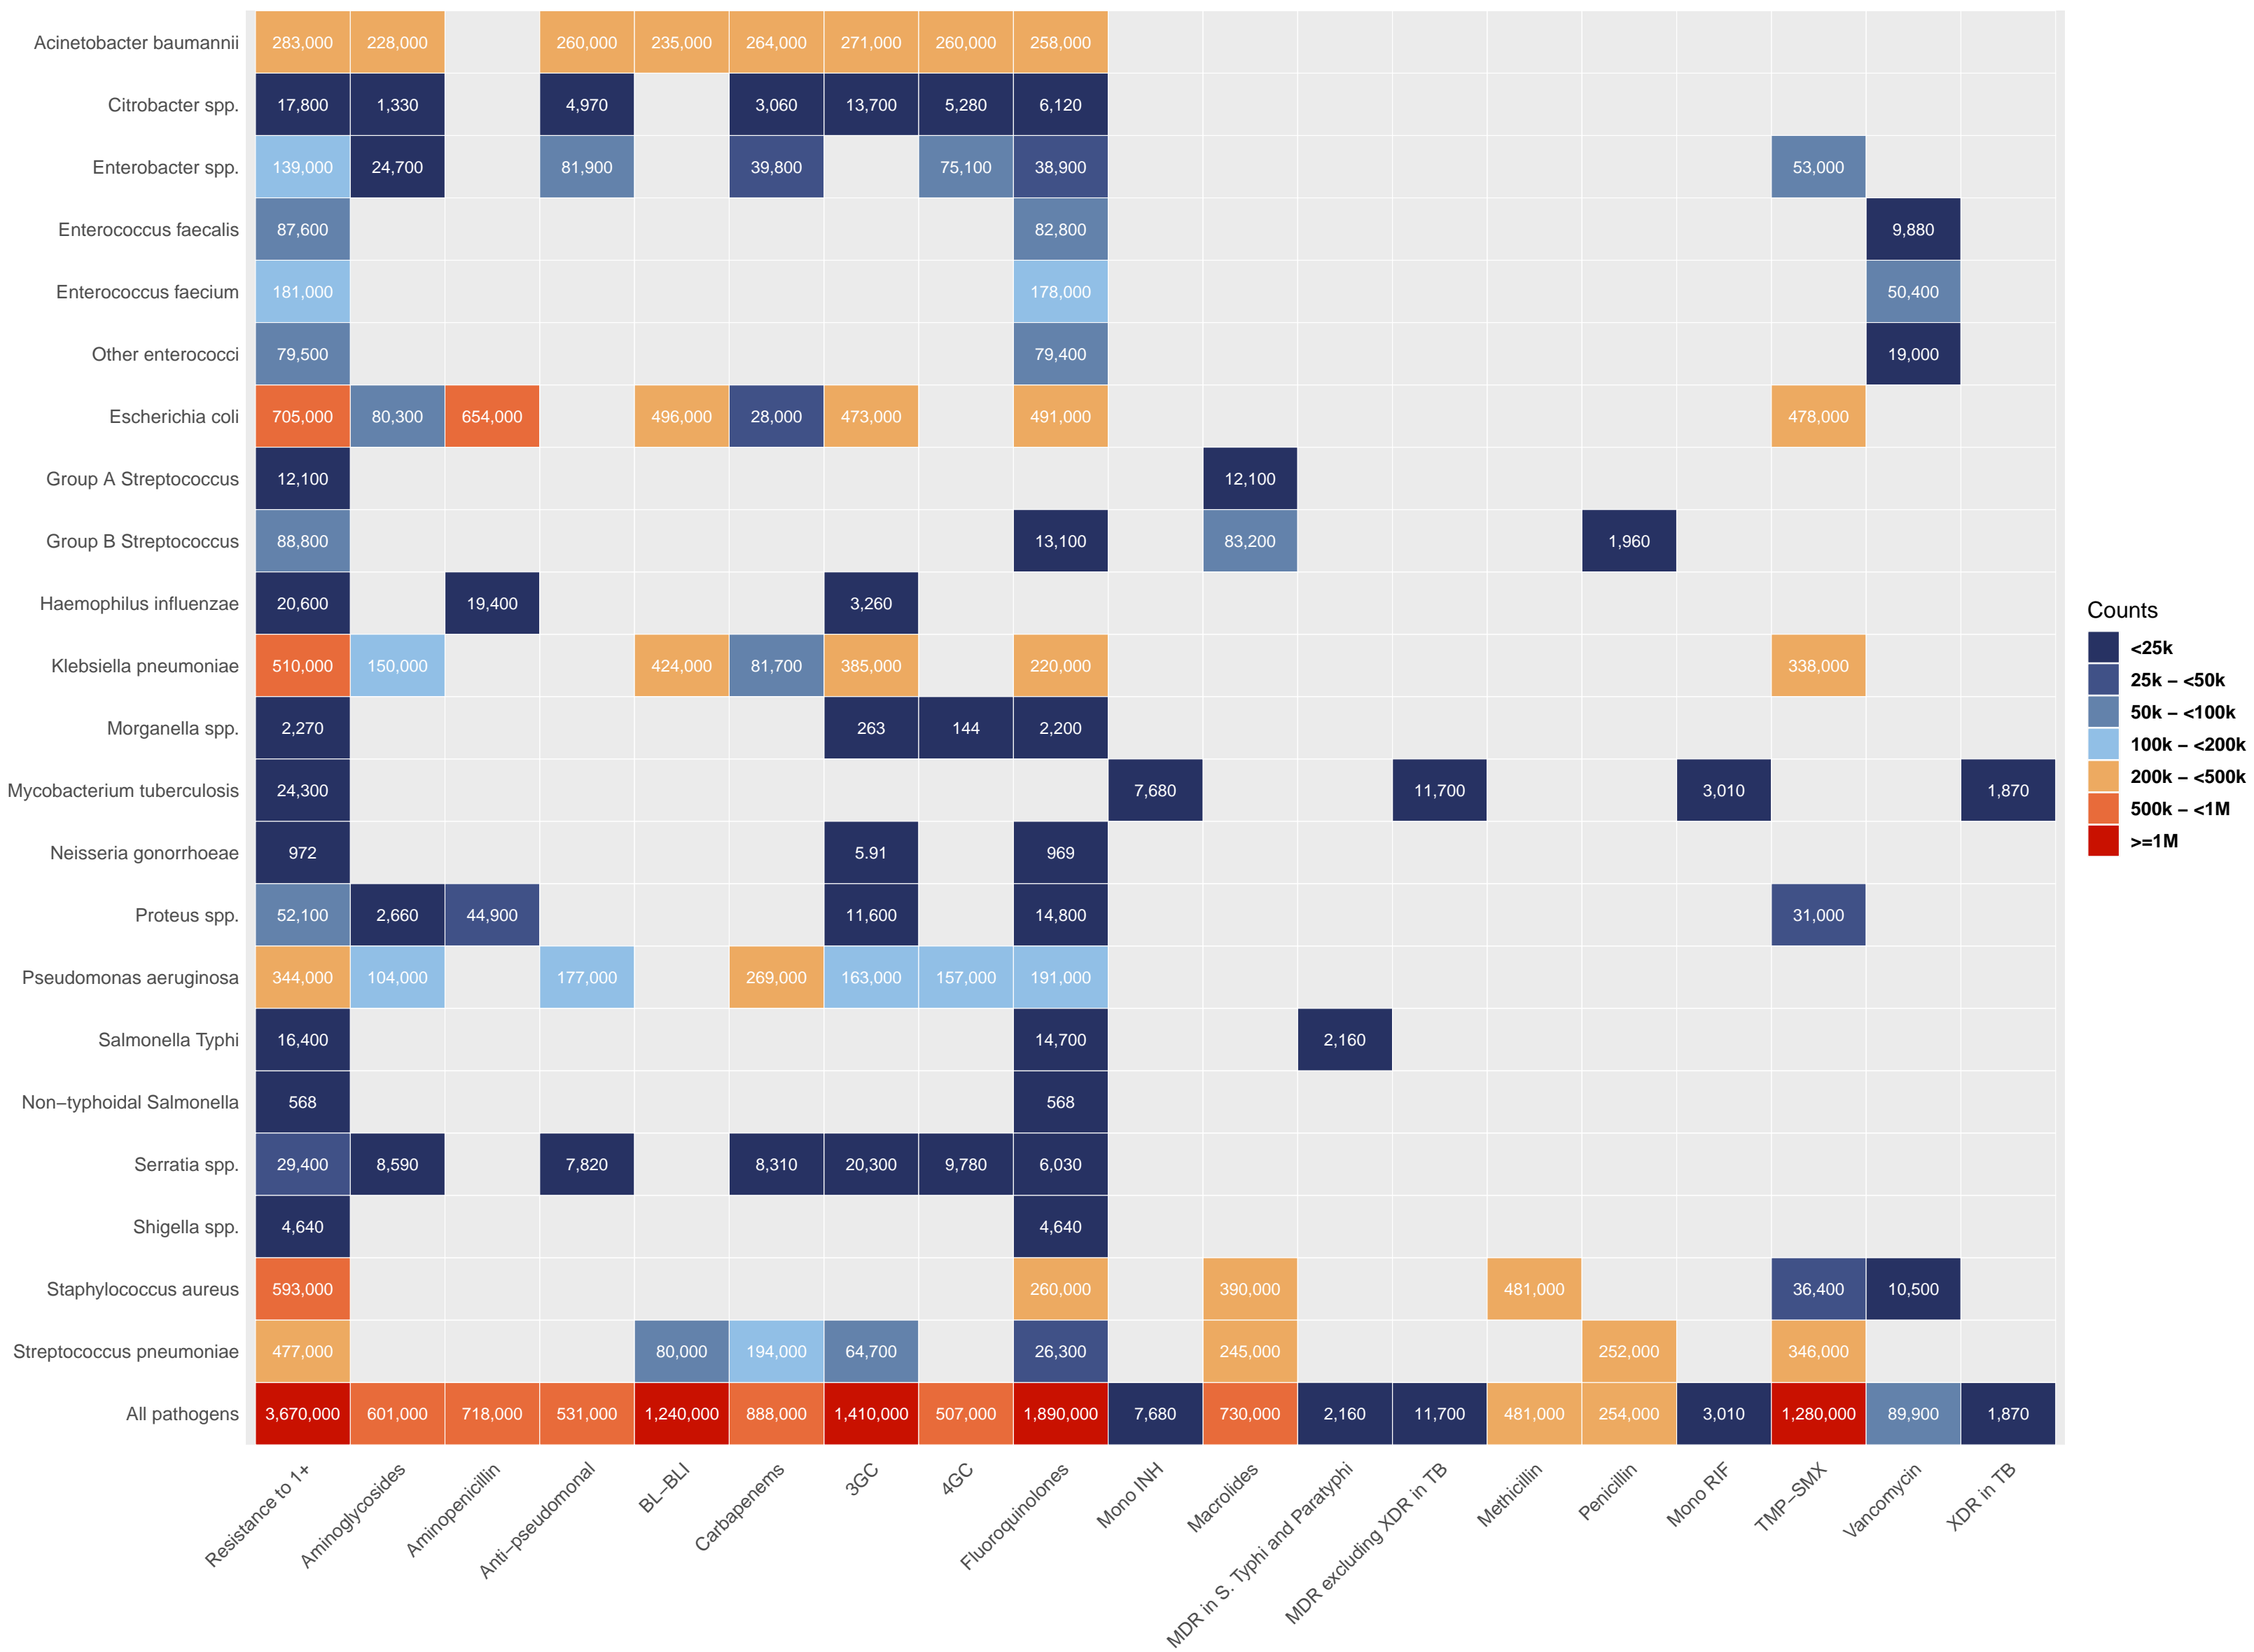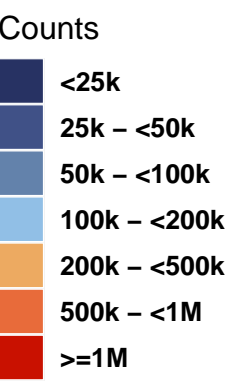

# Central Latin America

DALYs (count) *attributable* to bacterial antimicrobial resistance by pathogen–drug combinations, 2019

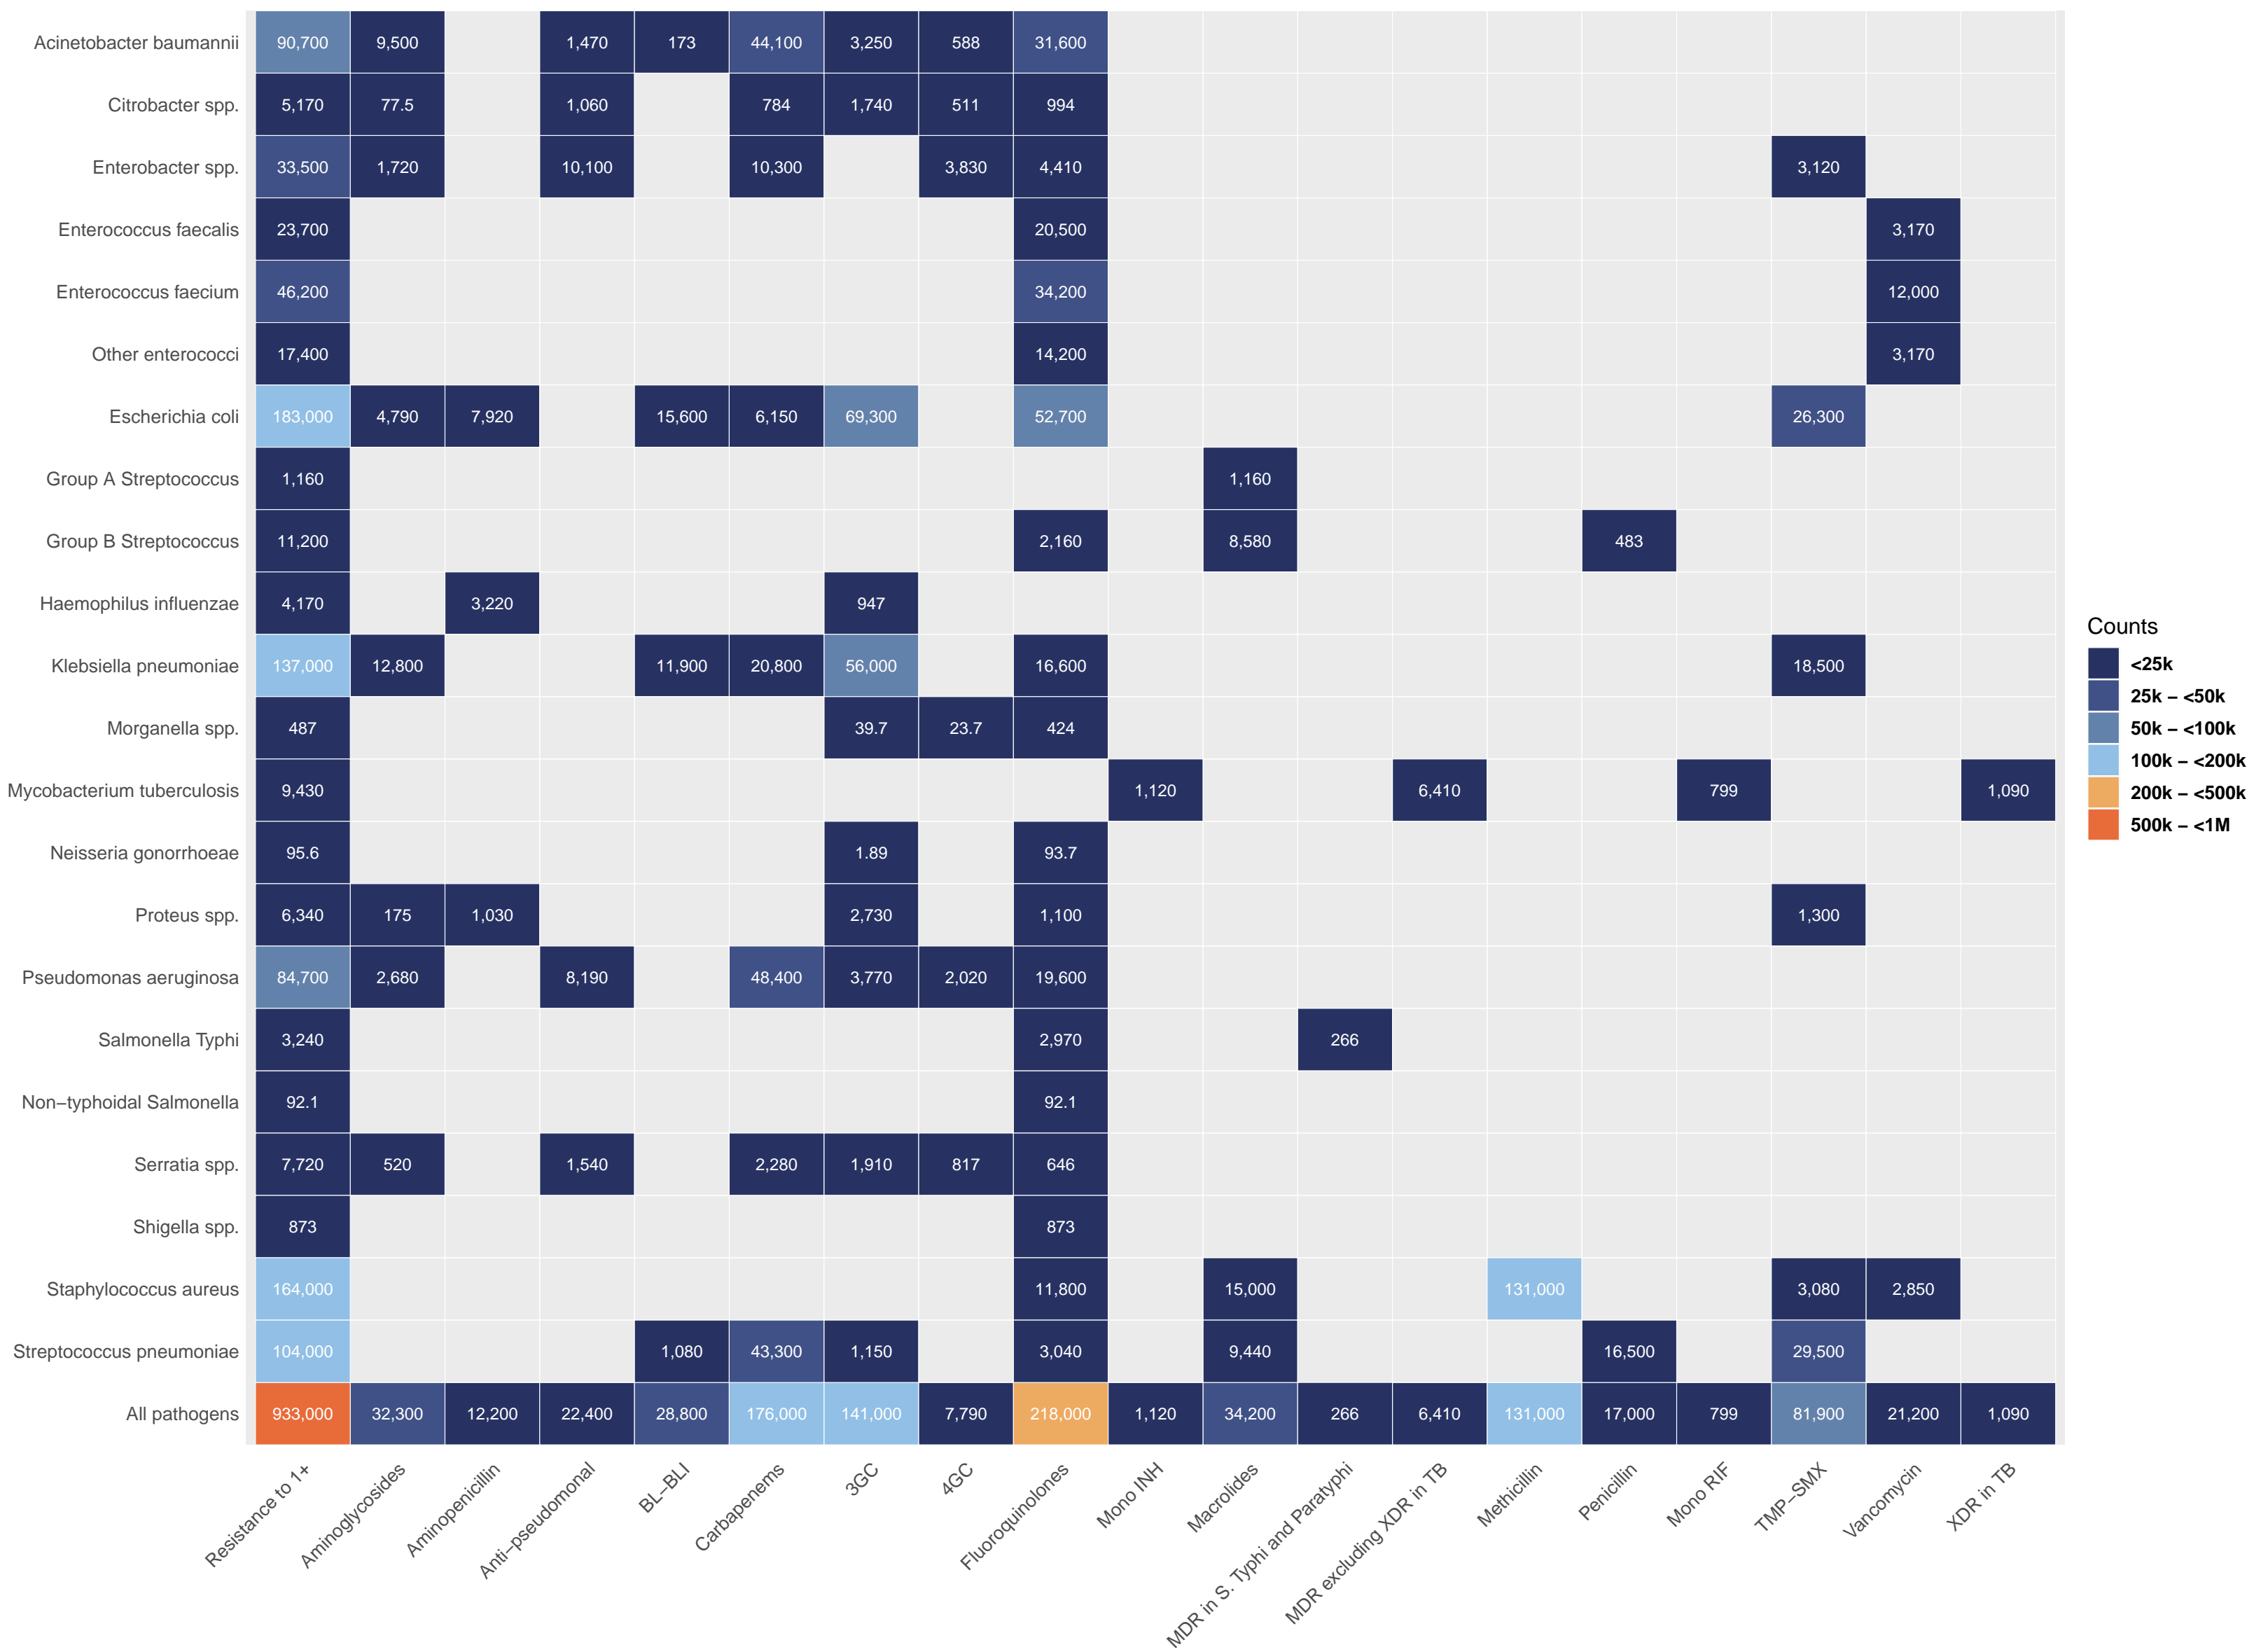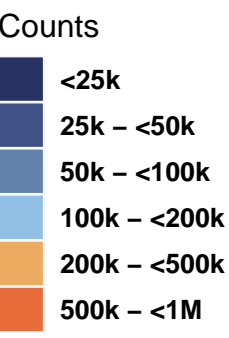

# High-income North America

DALYs (count) associated with bacterial antimicrobial resistance by pathogen-drug combinations, 2019

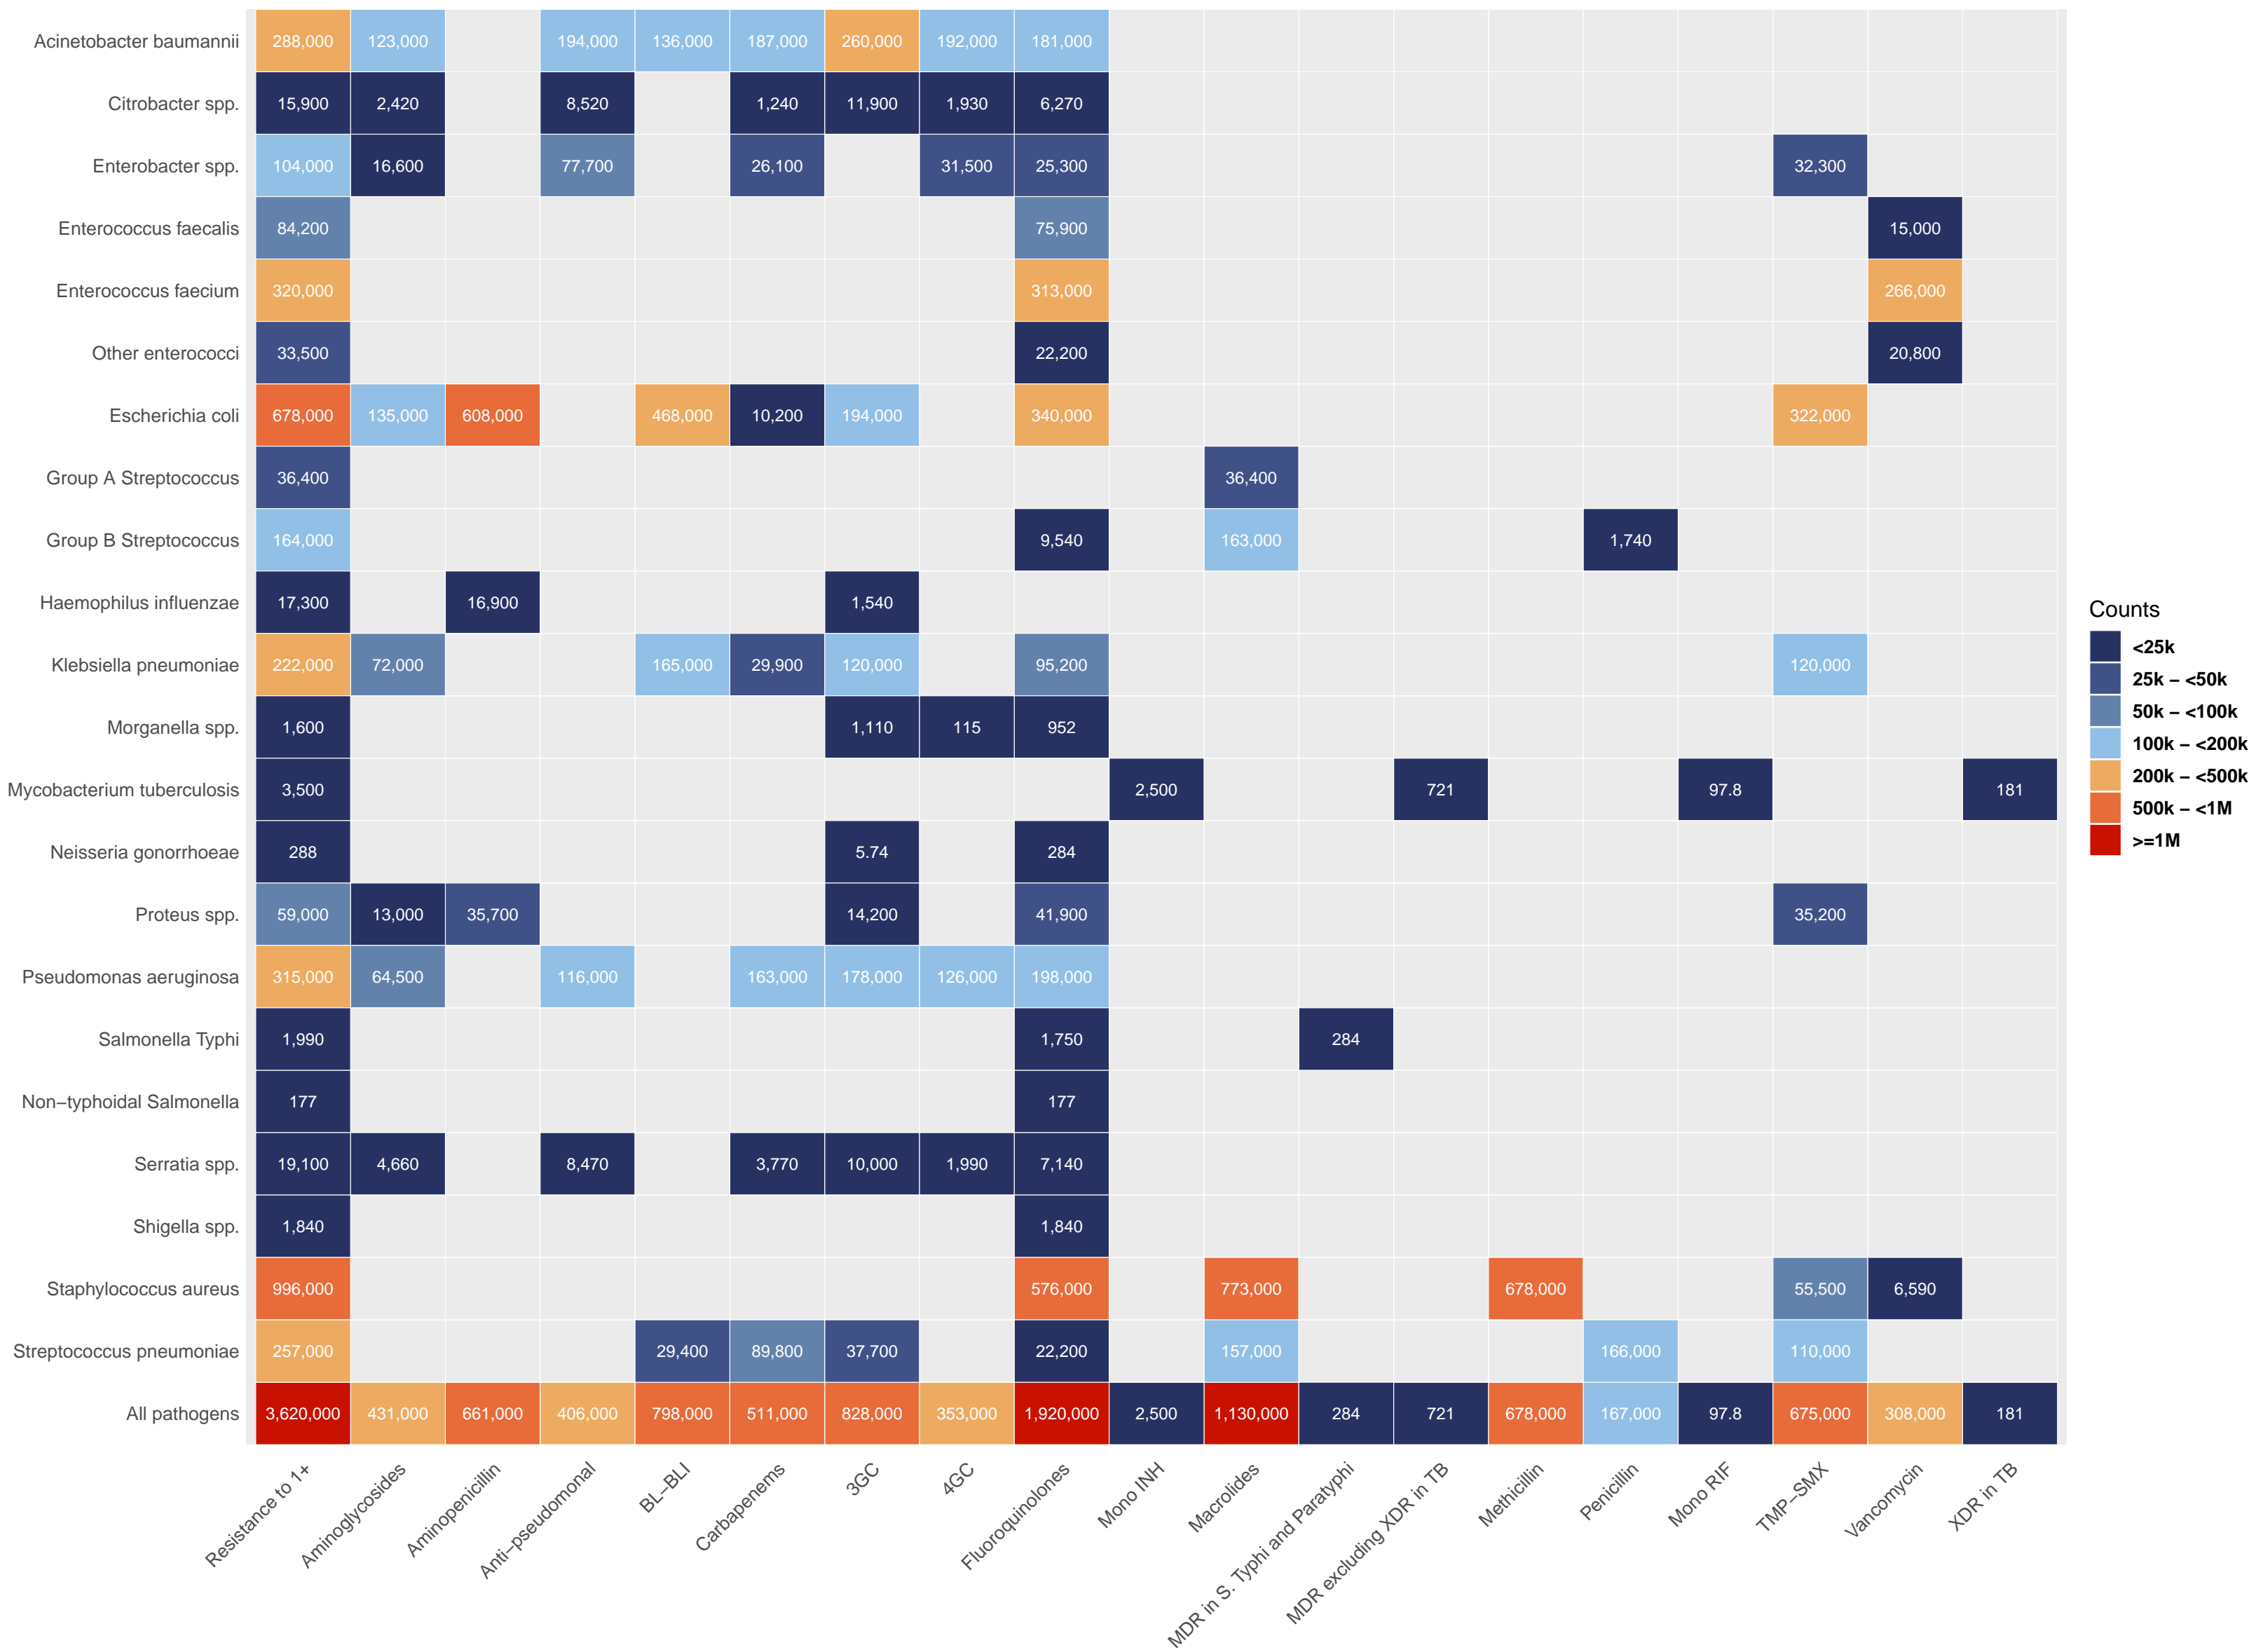

# High-income North America

DALYs (count) attributable to bacterial antimicrobial resistance by pathogen-drug combinations, 2019

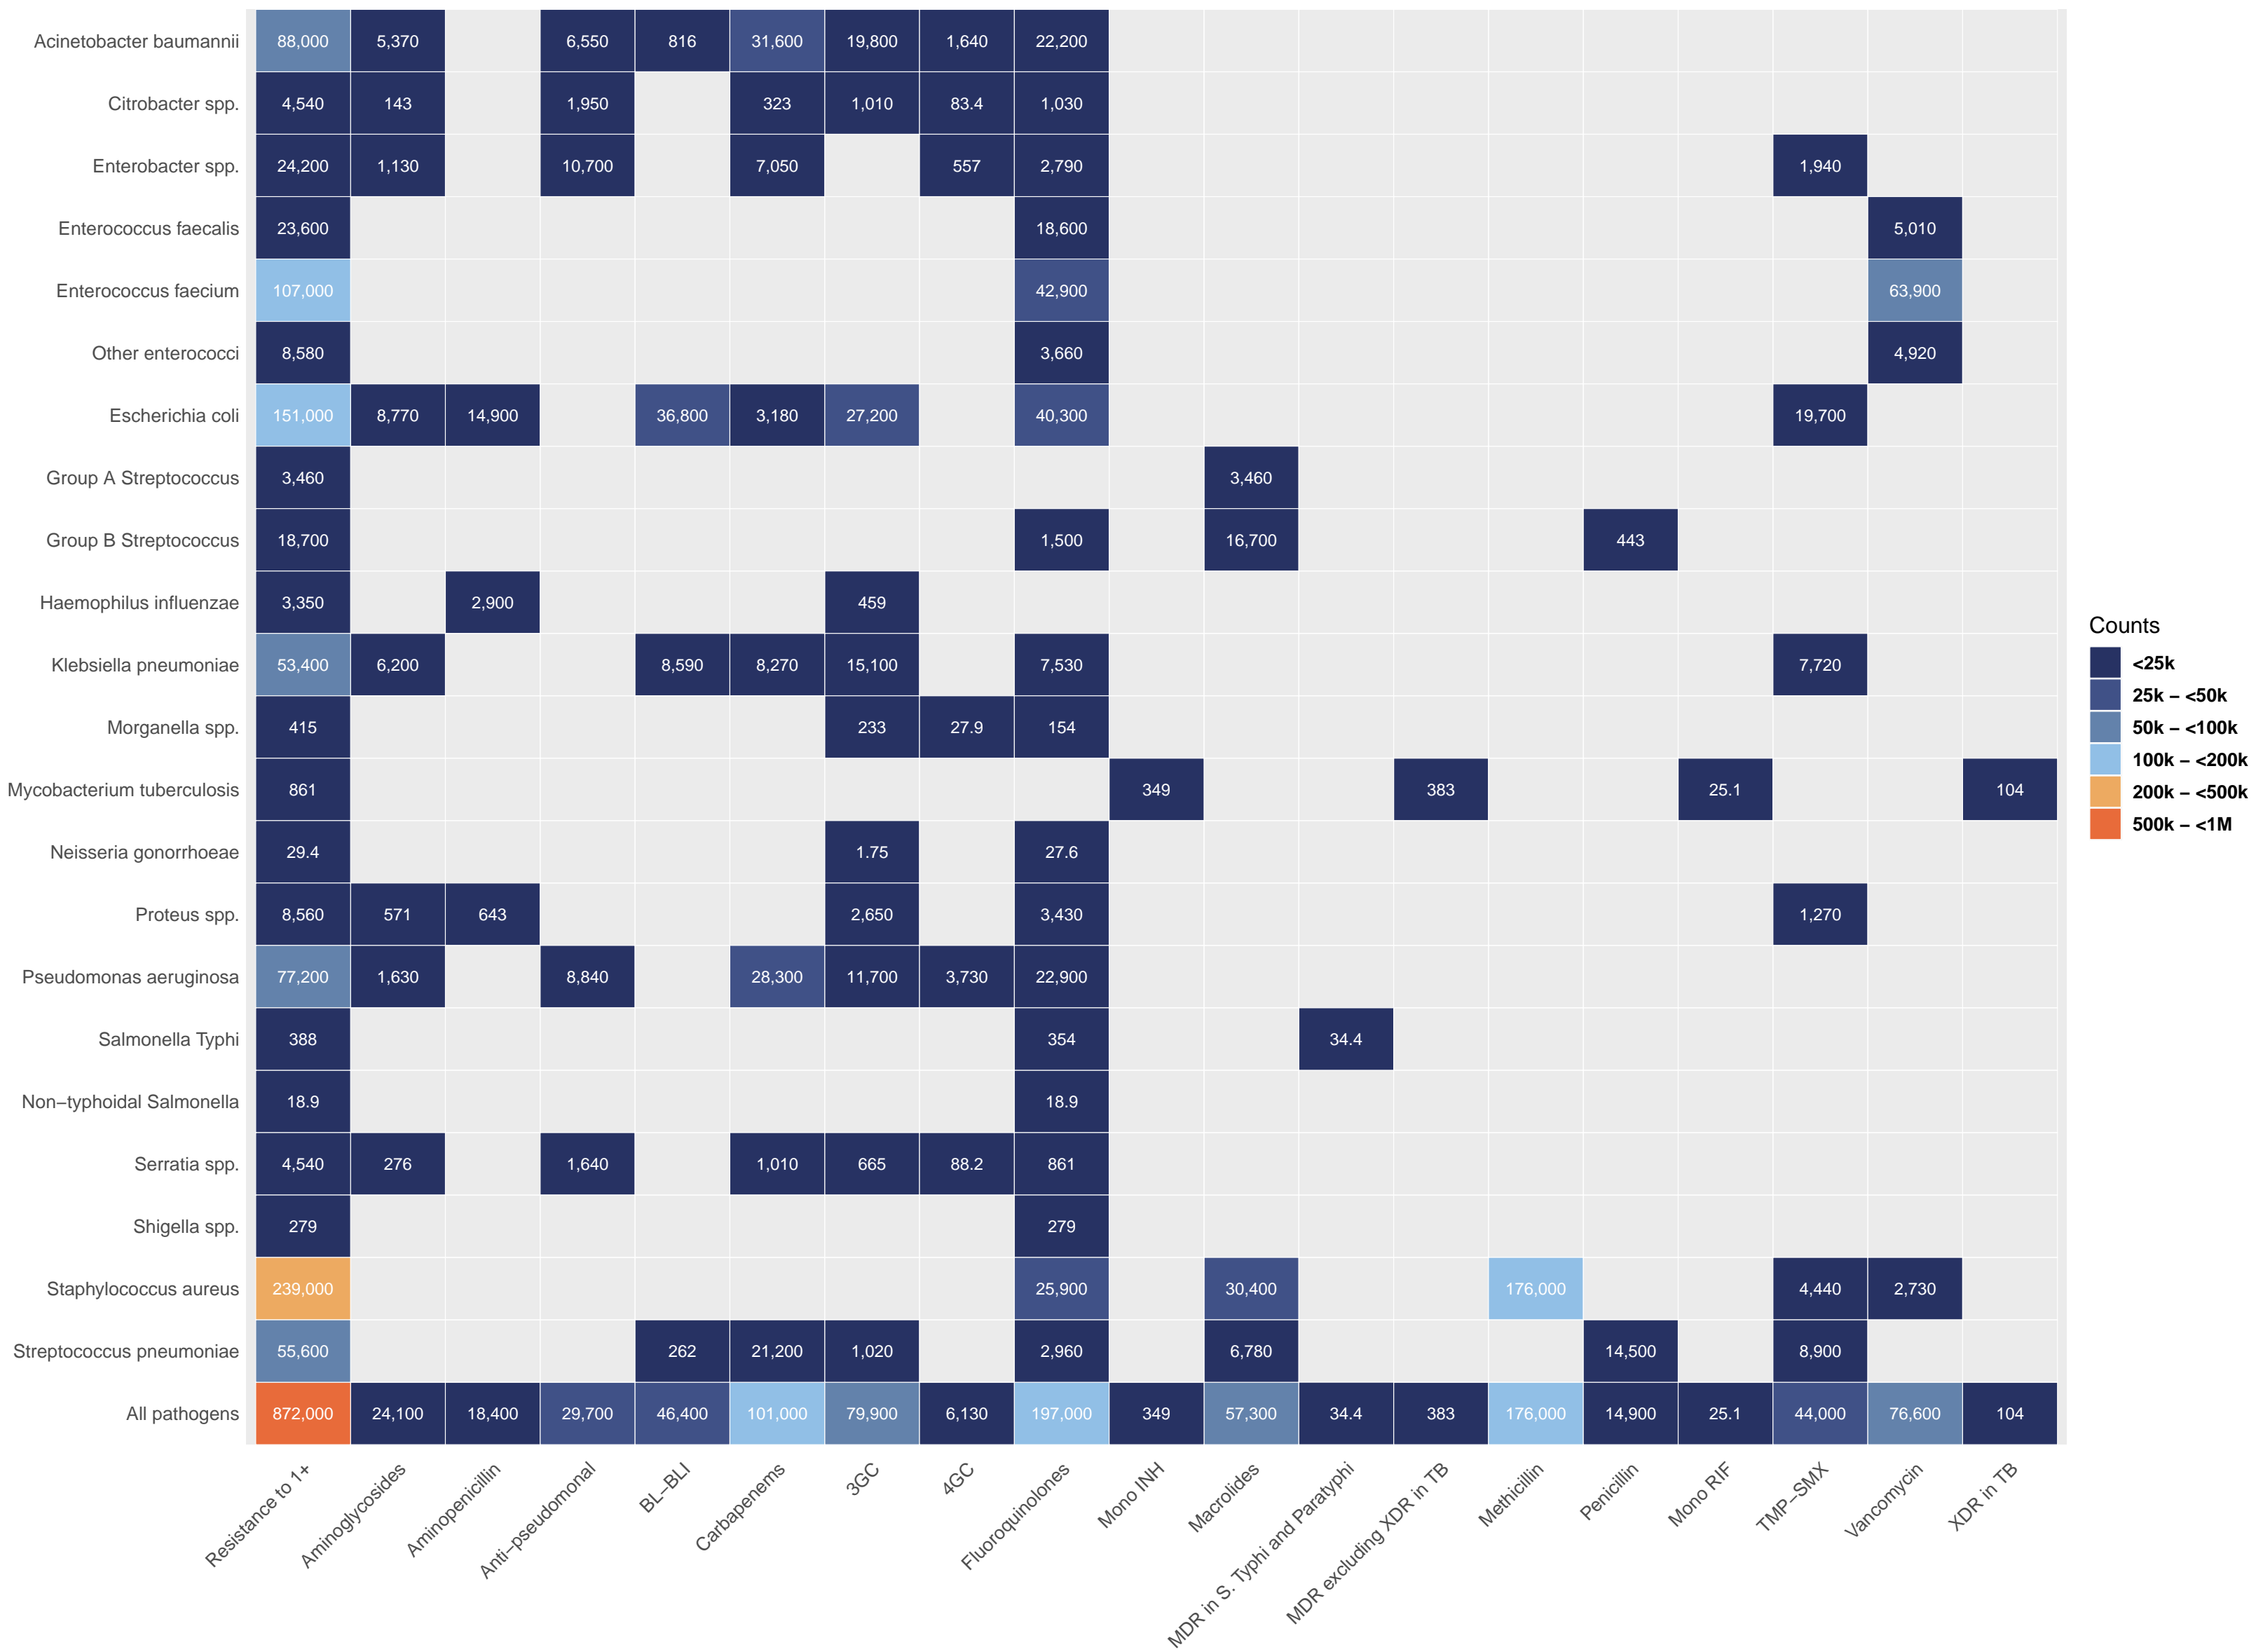

# Southern Latin America

DALYs (count) associated with bacterial antimicrobial resistance by pathogen–drug combinations, 2019

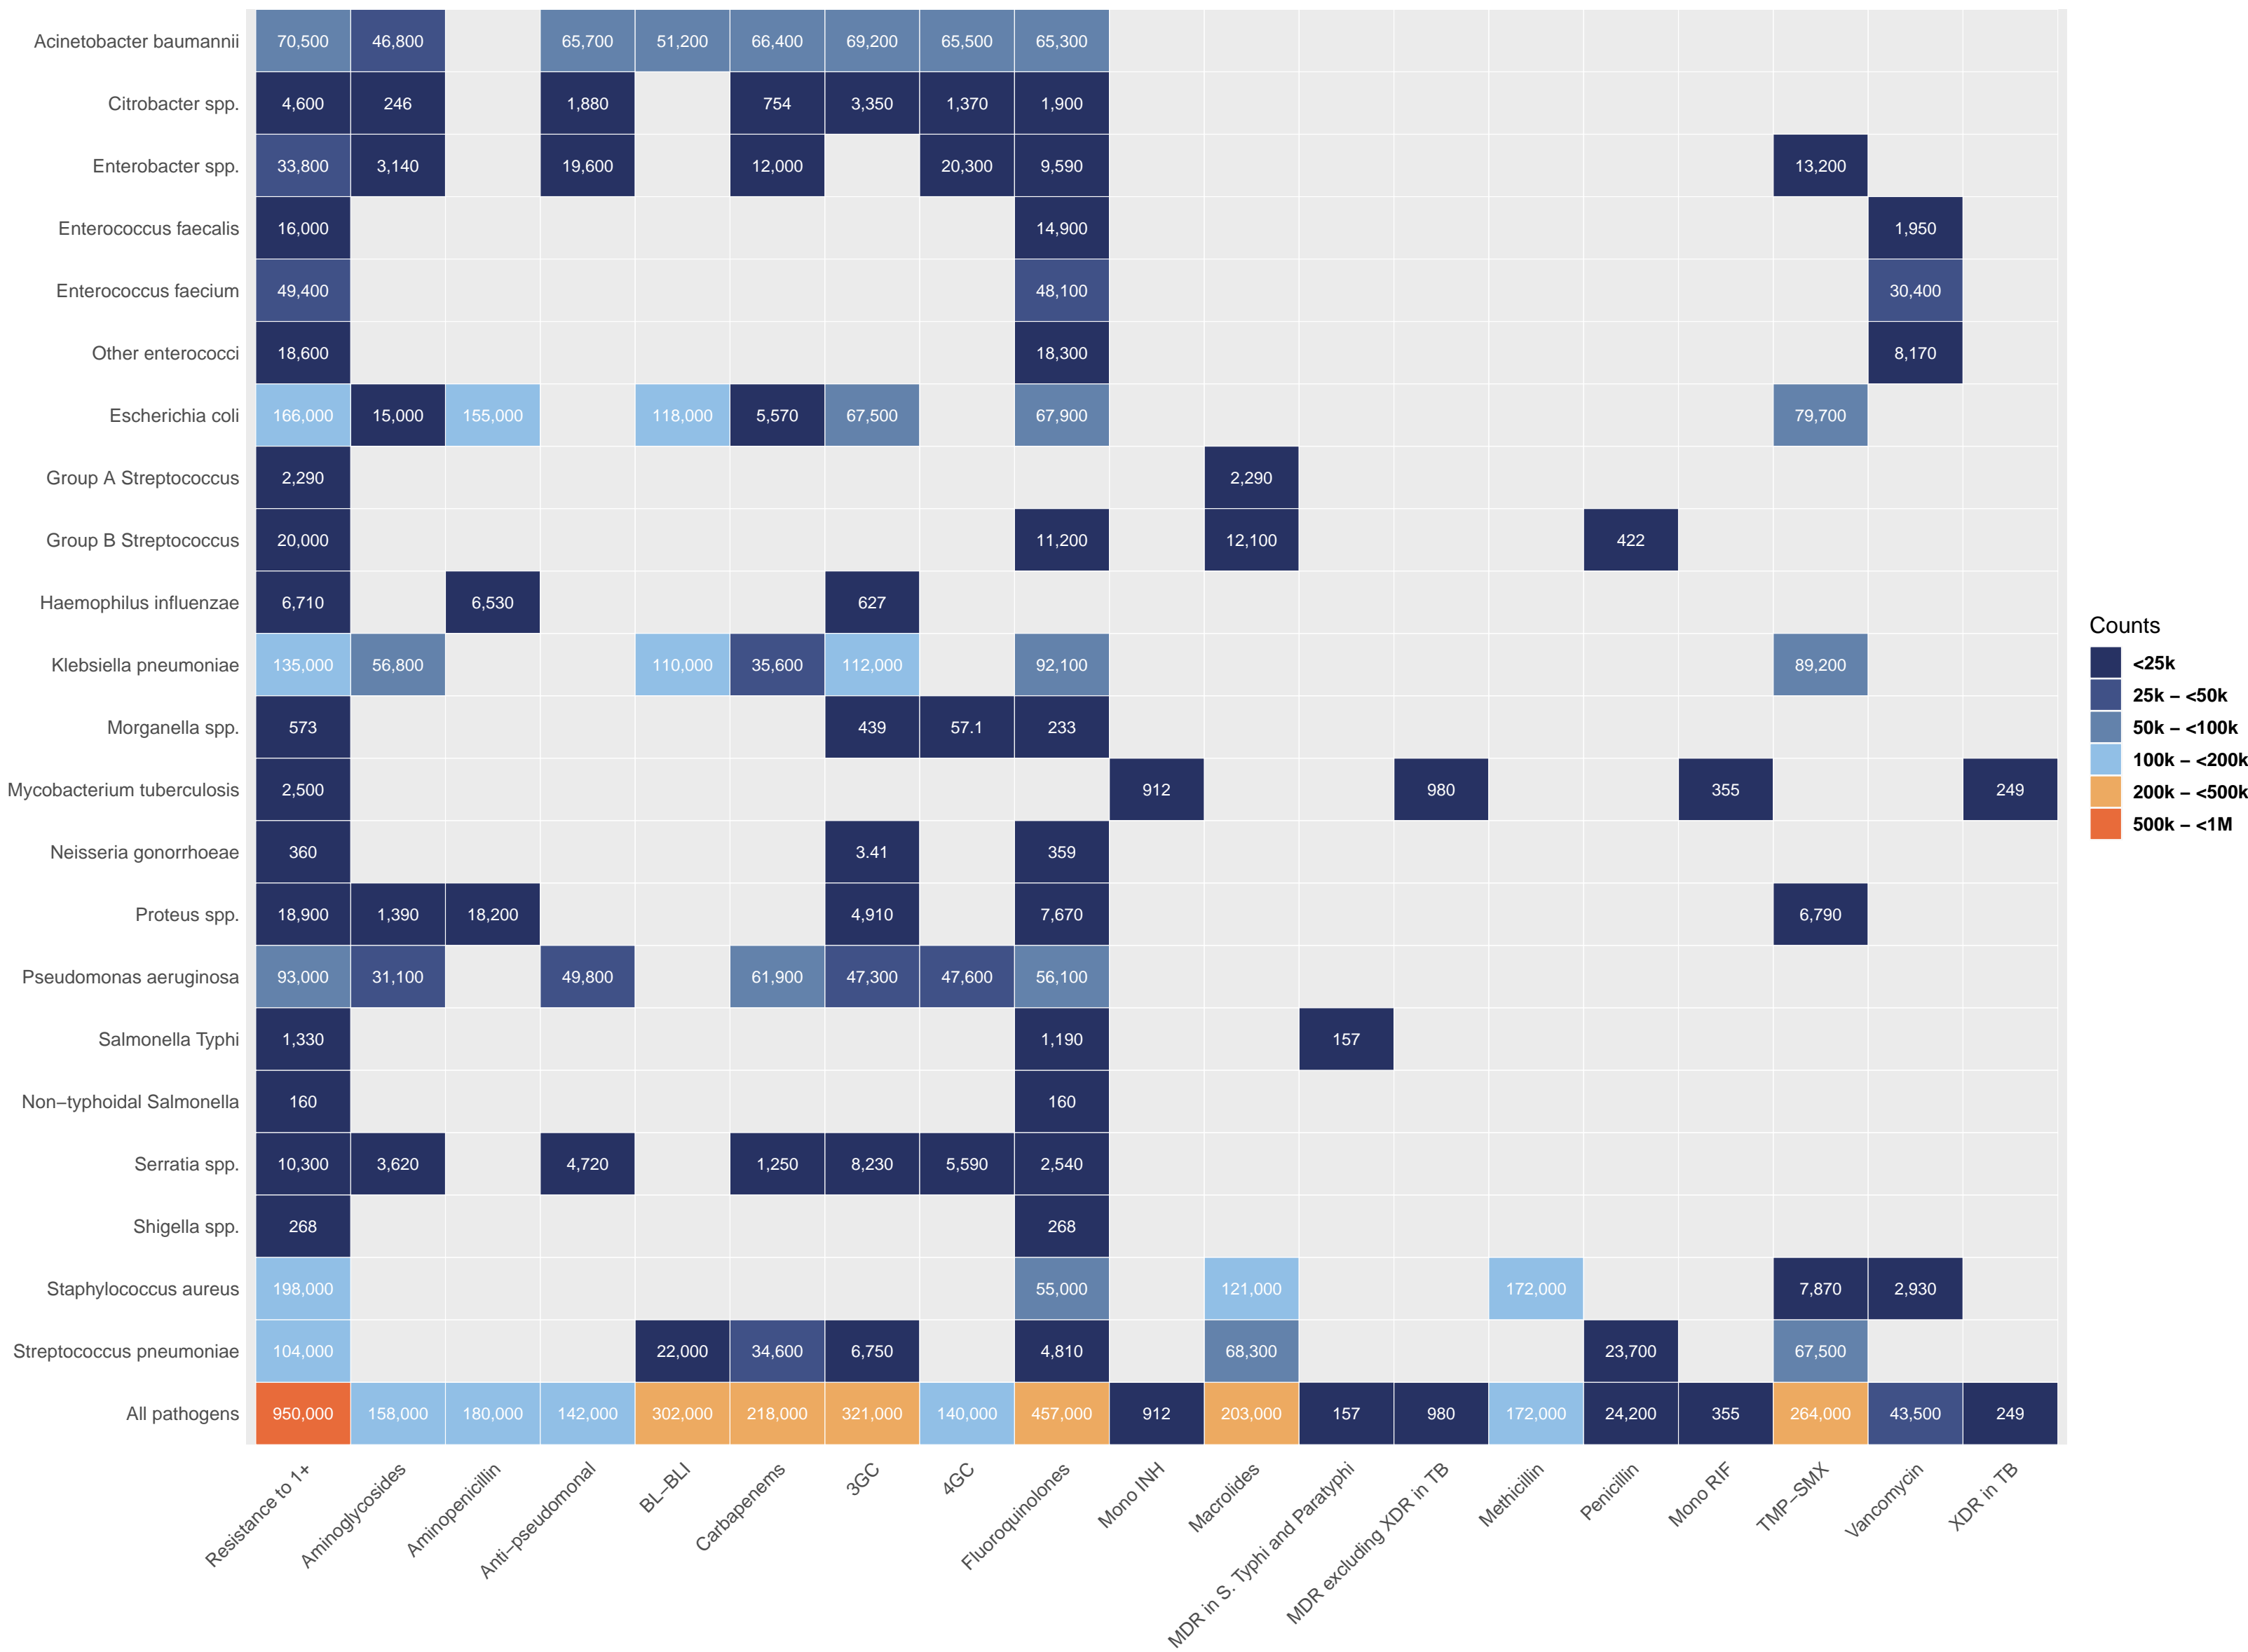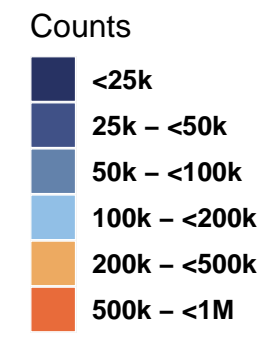

# Southern Latin America

DALYs (count) *attributable to bacterial antimicrobial resistance by pathogen–drug combinations, 2019*

|                            |                  |                 |                 |                  |        |             |        |       |                  |          |            |                               |                         |             |            |          |         |            |           |
|----------------------------|------------------|-----------------|-----------------|------------------|--------|-------------|--------|-------|------------------|----------|------------|-------------------------------|-------------------------|-------------|------------|----------|---------|------------|-----------|
| Acinetobacter baumannii    | 22,700           | 1,950           |                 | 399              | 2.27   | 11,300      | 724    | 160   | 8,170            |          |            |                               |                         |             |            |          |         |            |           |
| Citrobacter spp.           | 1,330            | 14.7            |                 | 389              |        | 187         | 304    | 110   | 322              |          |            |                               |                         |             |            |          |         |            |           |
| Enterobacter spp.          | 8,450            | 207             |                 | 2,250            |        | 3,180       |        | 1,010 | 1,030            |          |            |                               |                         |             |            |          | 767     |            |           |
| Enterococcus faecalis      | 4,350            |                 |                 |                  |        |             |        |       | 3,700            |          |            |                               |                         |             |            |          |         | 658        |           |
| Enterococcus faecium       | 14,900           |                 |                 |                  |        |             |        |       | 7,740            |          |            |                               |                         |             |            |          |         | 7,150      |           |
| Other enterococci          | 4,420            |                 |                 |                  |        |             |        |       | 3,010            |          |            |                               |                         |             |            |          |         | 1,410      |           |
| Escherichia coli           | 38,100           | 1,070           | 3,590           |                  | 8,500  | 1,510       | 10,900 |       | 7,560            |          |            |                               |                         |             |            |          |         | 4,990      |           |
| Group A Streptococcus      | 220              |                 |                 |                  |        |             |        |       |                  |          | 220        |                               |                         |             |            |          |         |            |           |
| Group B Streptococcus      | 3,320            |                 |                 |                  |        |             |        |       | 2,070            |          | 1,160      |                               |                         |             | 93.6       |          |         |            |           |
| Haemophilus influenzae     | 1,310            |                 | 1,120           |                  |        |             |        | 189   |                  |          |            |                               |                         |             |            |          |         |            |           |
| Klebsiella pneumoniae      | 38,700           | 4,510           |                 |                  | 2,030  | 7,820       | 13,200 |       | 6,760            |          |            |                               |                         |             |            |          |         | 4,430      |           |
| Morganella spp.            | 151              |                 |                 |                  |        |             |        | 98.9  | 13.6             | 38.6     |            |                               |                         |             |            |          |         |            |           |
| Mycobacterium tuberculosis | 917              |                 |                 |                  |        |             |        |       |                  | 134      |            |                               |                         | 542         |            |          | 94.2    |            | 147       |
| Neisseria gonorrhoeae      | 35.7             |                 |                 |                  |        |             |        | 0.933 |                  | 34.8     |            |                               |                         |             |            |          |         |            |           |
| Proteus spp.               | 2,450            | 73.6            | 419             |                  |        |             |        | 1,130 |                  | 572      |            |                               |                         |             |            |          |         | 252        |           |
| Pseudomonas aeruginosa     | 22,900           | 782             |                 | 3,310            |        | 10,800      | 1,130  | 896   | 5,980            |          |            |                               |                         |             |            |          |         |            |           |
| Salmonella Typhi           | 263              |                 |                 |                  |        |             |        |       | 243              |          |            |                               | 19.9                    |             |            |          |         |            |           |
| Non-typhoidal Salmonella   | 25.6             |                 |                 |                  |        |             |        |       | 25.6             |          |            |                               |                         |             |            |          |         |            |           |
| Serratia spp.              | 2,700            | 209             |                 | 951              |        | 321         | 447    | 510   | 261              |          |            |                               |                         |             |            |          |         |            |           |
| Shigella spp.              | 40.6             |                 |                 |                  |        |             |        |       | 40.6             |          |            |                               |                         |             |            |          |         |            |           |
| Staphylococcus aureus      | 57,400           |                 |                 |                  |        |             |        |       | 2,650            |          | 4,750      |                               |                         | 48,500      |            |          |         | 660        | 780       |
| Streptococcus pneumoniae   | 19,100           |                 |                 |                  | 580    | 7,740       | 104    |       | 610              |          | 3,010      |                               |                         |             | 957        |          |         | 6,100      |           |
| All pathogens              | 244,000          | 8,810           | 5,130           | 7,310            | 11,100 | 42,900      | 28,200 | 2,700 | 50,800           | 134      | 9,130      | 19.9                          | 542                     | 48,500      | 1,050      | 94.2     | 17,200  | 9,990      | 147       |
|                            | Resistance to 1+ | Aminoglycosides | Aminopenicillin | Anti-pseudomonal | BL-BLI | Carbapenems | 3GC    | 4GC   | Fluoroquinolones | Mono INH | Macrolides | MDR in S. Typhi and Paratyphi | MDR excluding XDR in TB | Methicillin | Penicillin | Mono RIF | TMP-SMX | Vancomycin | XDR in TB |



# Tropical Latin America

DALYs (count) associated with bacterial antimicrobial resistance by pathogen–drug combinations, 2019

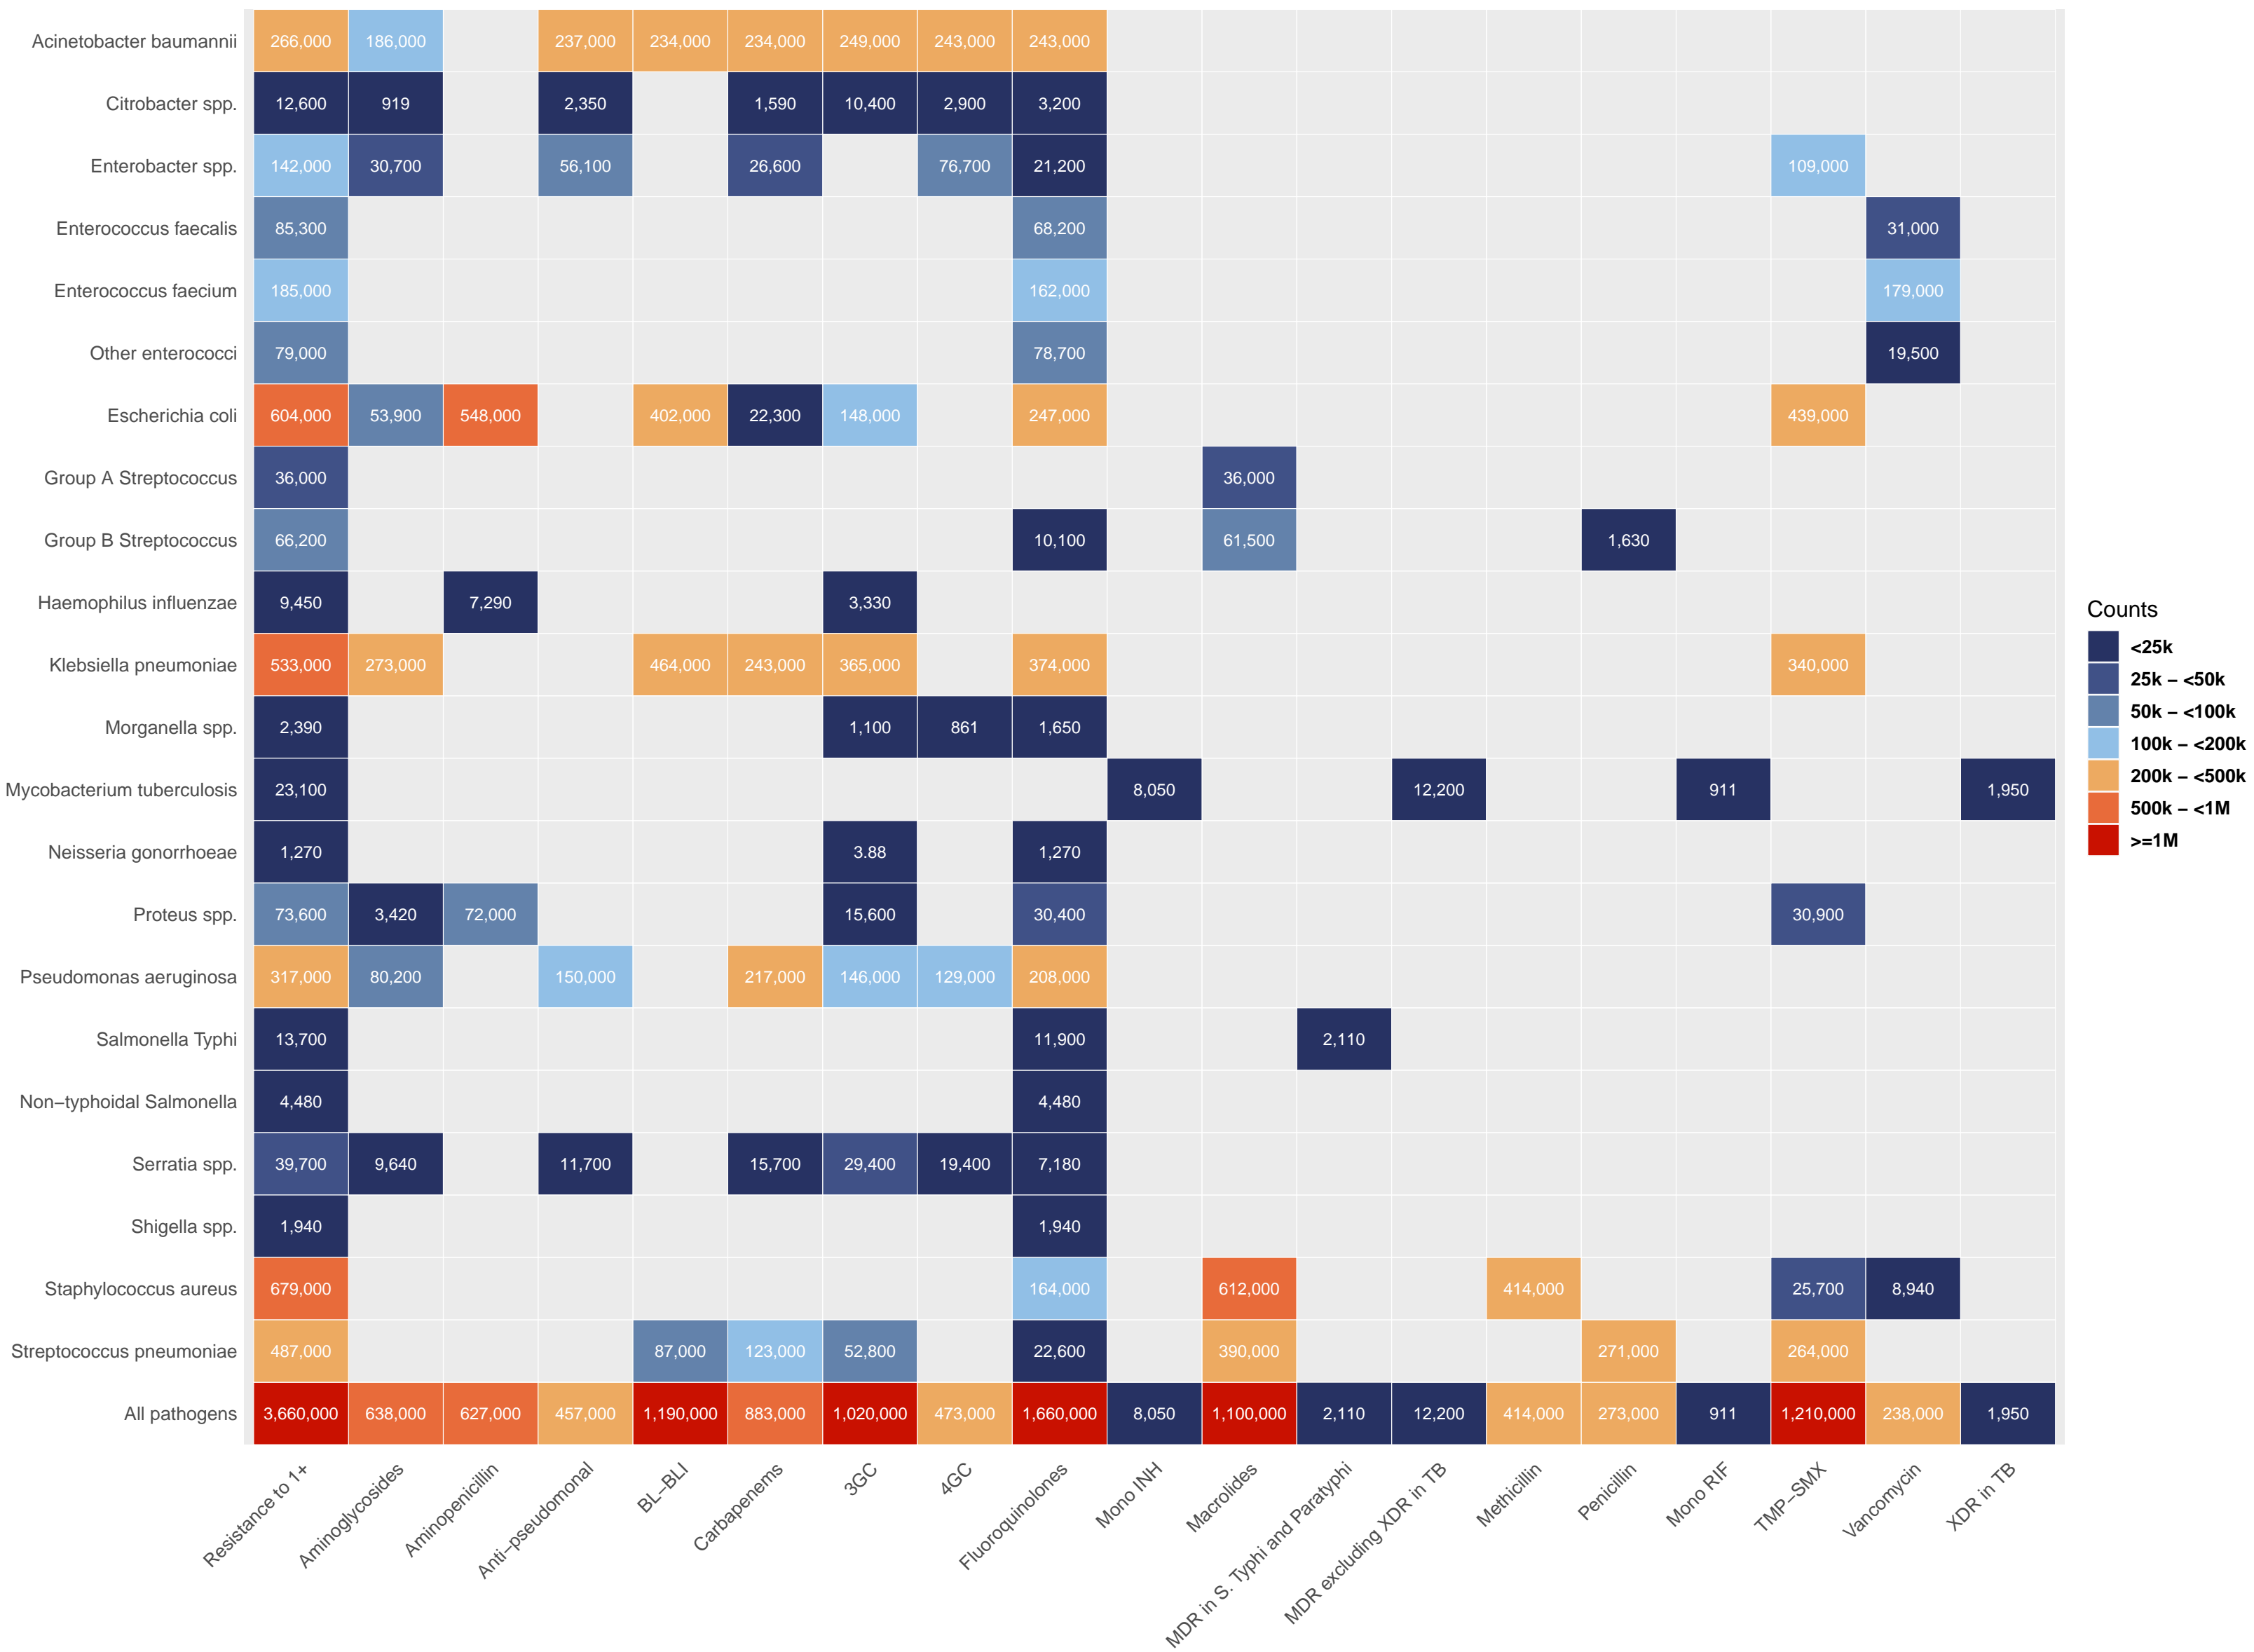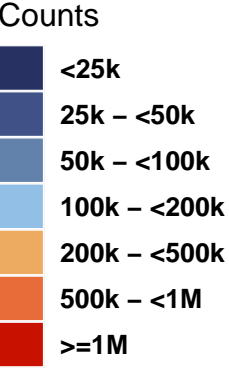

# Tropical Latin America

DALYs (count) *attributable to bacterial antimicrobial resistance by pathogen–drug combinations, 2019*

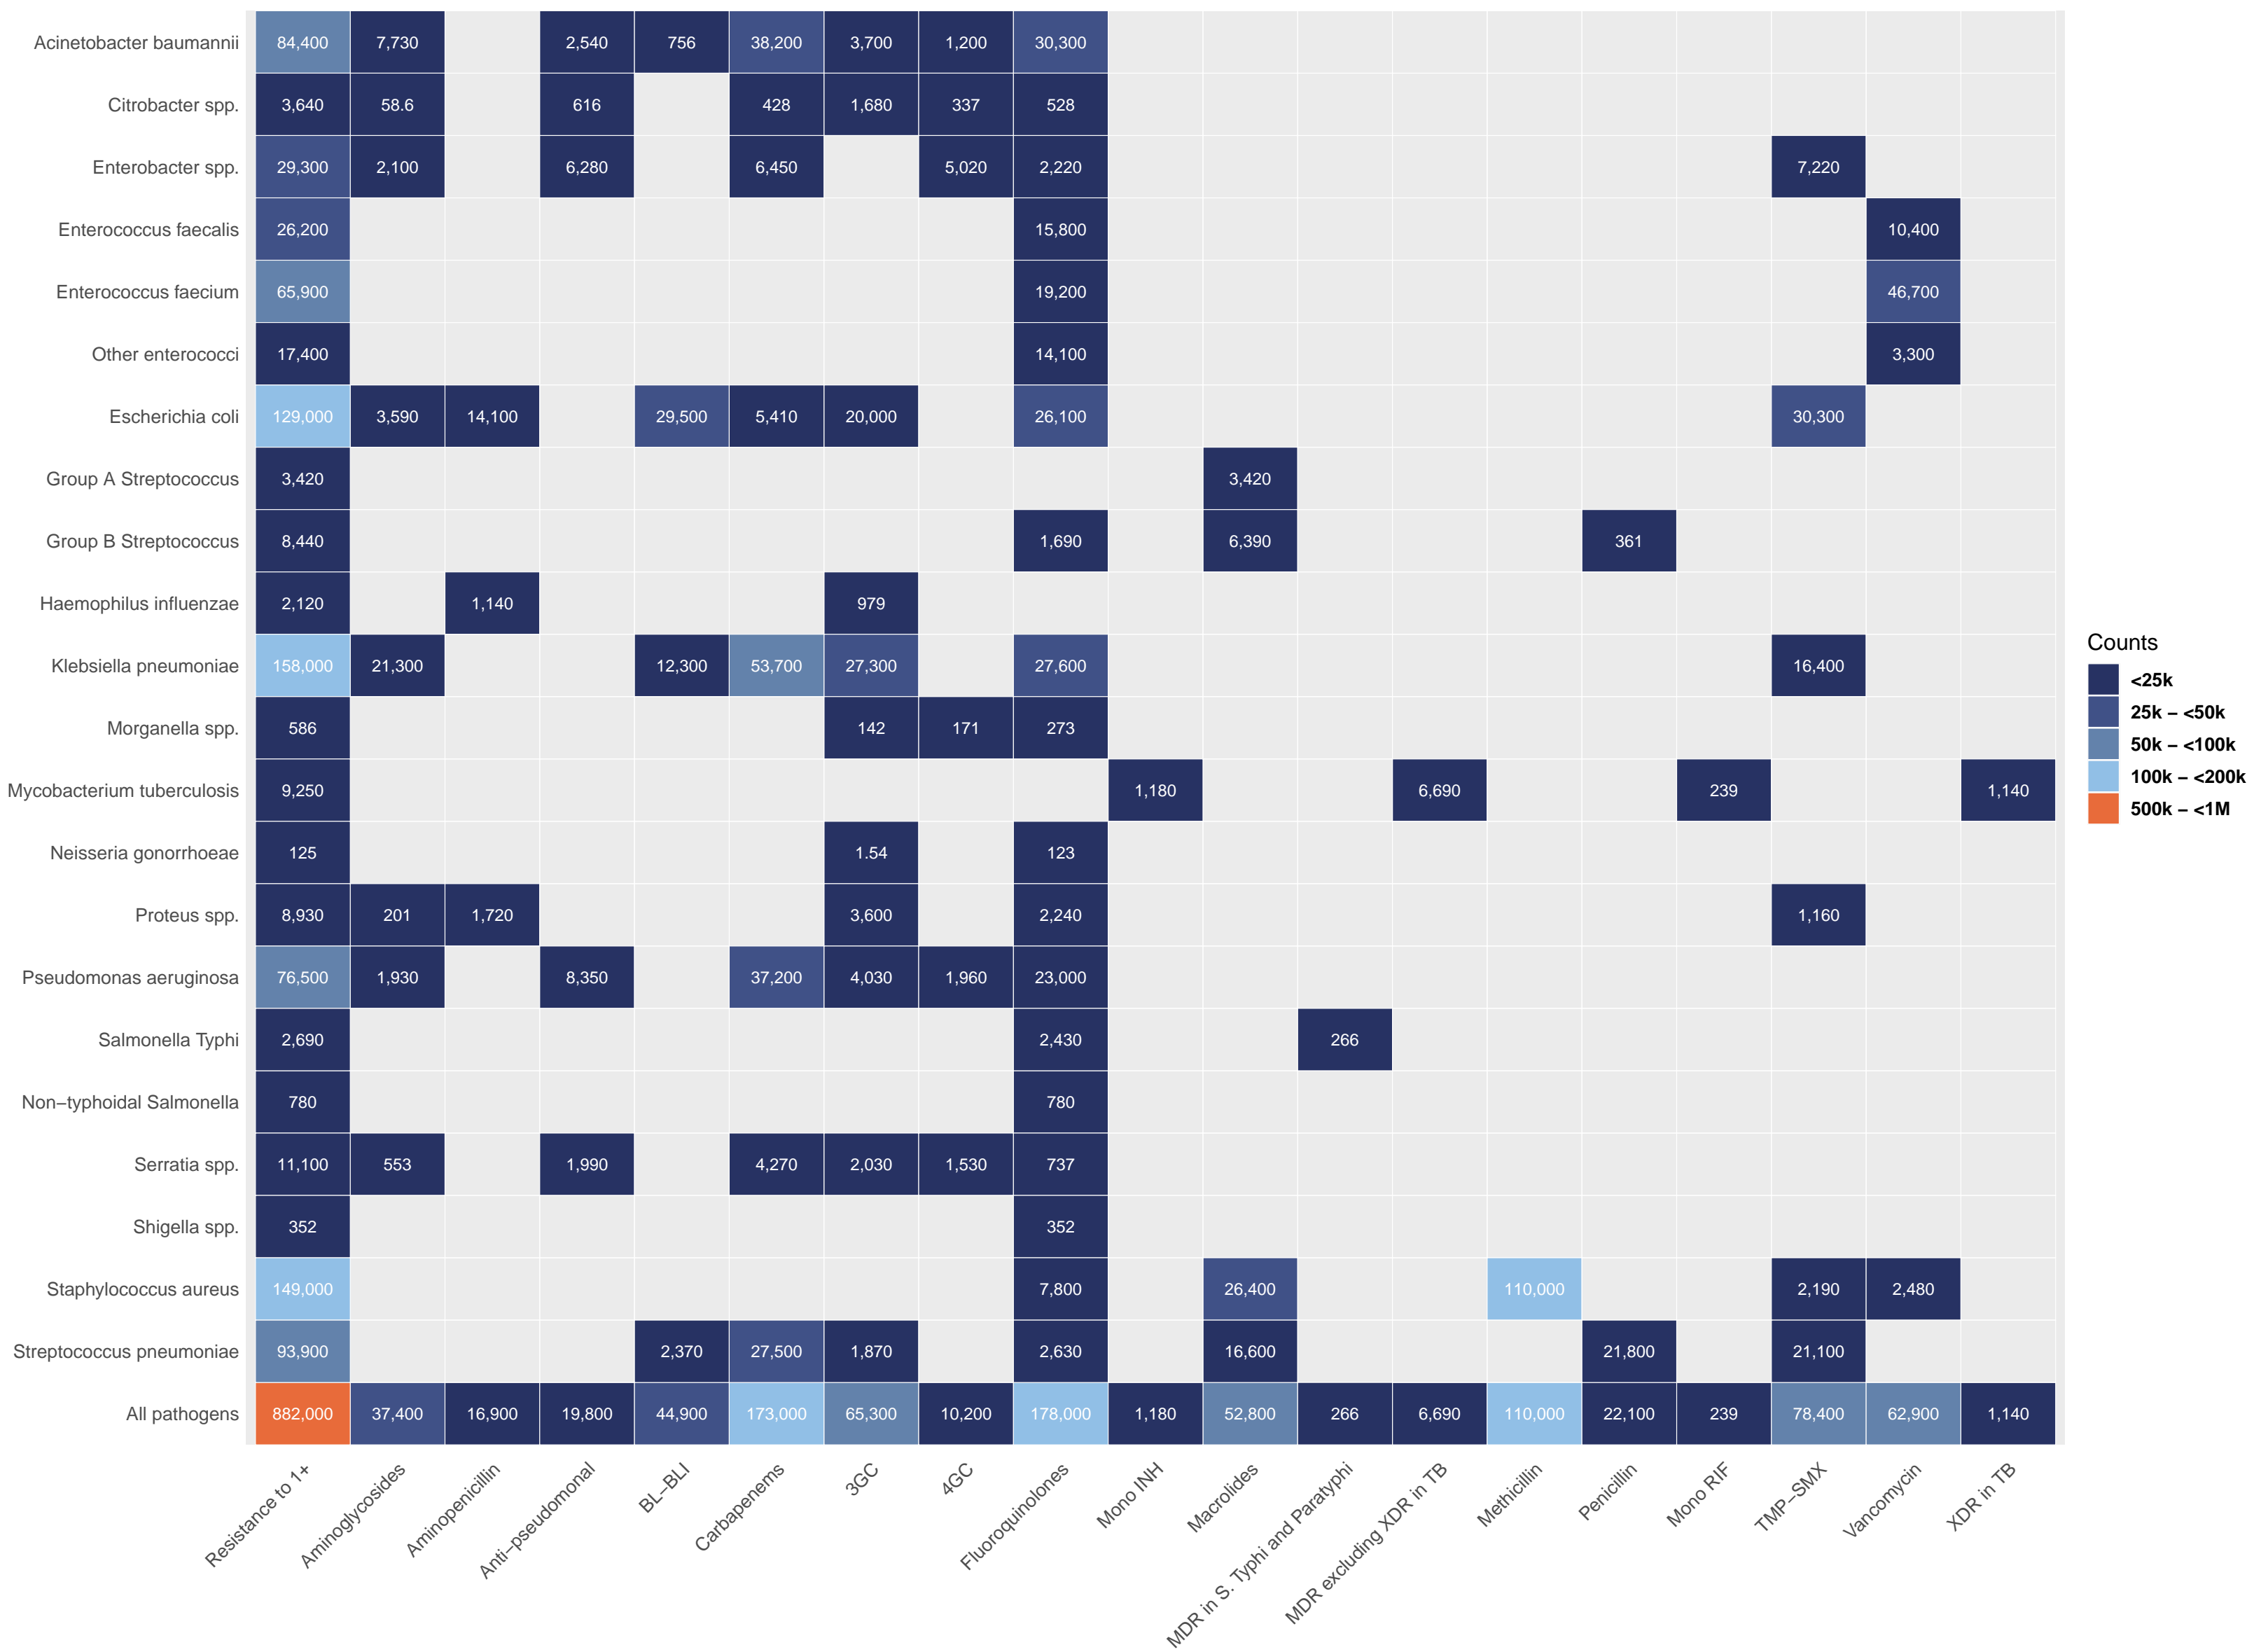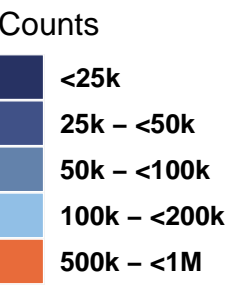



# Antigua and Barbuda

DALYs (count) associated with bacterial antimicrobial resistance by pathogen–drug combinations, 2019

|                            |                  |                 |                 |                  |        |             |       |       |                  |          |            |                               |                         |             |            |          |         |            |           |
|----------------------------|------------------|-----------------|-----------------|------------------|--------|-------------|-------|-------|------------------|----------|------------|-------------------------------|-------------------------|-------------|------------|----------|---------|------------|-----------|
| Acinetobacter baumannii    | 198              | 136             |                 | 184              | 161    | 167         | 176   | 170   | 195              |          |            |                               |                         |             |            |          |         |            |           |
| Citrobacter spp.           | 9.27             | 1.39            |                 | 1.79             |        | 1.68        | 6.28  | 4.18  | 3.2              |          |            |                               |                         |             |            |          |         |            |           |
| Enterobacter spp.          | 71.5             | 14.4            |                 | 26.9             |        | 17.9        |       | 31.9  | 28.8             |          |            |                               |                         |             |            |          | 47.9    |            |           |
| Enterococcus faecalis      | 25.8             |                 |                 |                  |        |             |       |       | 24.6             |          |            |                               |                         |             |            |          |         | 3          |           |
| Enterococcus faecium       | 48.8             |                 |                 |                  |        |             |       |       | 48.3             |          |            |                               |                         |             |            |          |         | 19.9       |           |
| Other enterococci          | 29.3             |                 |                 |                  |        |             |       |       | 29.2             |          |            |                               |                         |             |            |          |         | 6.81       |           |
| Escherichia coli           | 165              | 17              | 155             |                  | 130    | 13.5        | 84.2  |       | 96.6             |          |            |                               |                         |             |            |          |         | 111        |           |
| Group A Streptococcus      | 11.4             |                 |                 |                  |        |             |       |       |                  |          | 11.4       |                               |                         |             |            |          |         |            |           |
| Group B Streptococcus      | 18.5             |                 |                 |                  |        |             |       |       | 4.51             |          | 16         |                               |                         | 0.762       |            |          |         |            |           |
| Haemophilus influenzae     | 3.48             |                 | 2.8             |                  |        |             | 1.13  |       |                  |          |            |                               |                         |             |            |          |         |            |           |
| Klebsiella pneumoniae      | 126              | 29.9            |                 |                  | 103    | 13          | 83.1  |       | 72.2             |          |            |                               |                         |             |            |          |         | 102        |           |
| Morganella spp.            | 0.64             |                 |                 |                  |        |             | 0.147 | 0.094 | 0.594            |          |            |                               |                         |             |            |          |         |            |           |
| Mycobacterium tuberculosis | 0.36             |                 |                 |                  |        |             |       |       |                  | 0.077    |            |                               | 0.225                   |             |            | 0.027    |         |            | 0.031     |
| Neisseria gonorrhoeae      | 0.774            |                 |                 |                  |        |             | 0.005 |       | 0.773            |          |            |                               |                         |             |            |          |         |            |           |
| Proteus spp.               | 21               | 1.37            | 18.9            |                  |        |             | 4.09  |       | 10.1             |          |            |                               |                         |             |            |          |         | 13.4       |           |
| Pseudomonas aeruginosa     | 89.8             | 31.4            |                 | 38.6             |        | 67.5        | 36.5  | 30.6  | 53.9             |          |            |                               |                         |             |            |          |         |            |           |
| Salmonella Typhi           | 1.54             |                 |                 |                  |        |             |       |       | 1.31             |          |            | 0.281                         |                         |             |            |          |         |            |           |
| Non-typhoidal Salmonella   | 0.476            |                 |                 |                  |        |             |       |       | 0.476            |          |            |                               |                         |             |            |          |         |            |           |
| Serratia spp.              | 10.8             | 3.26            |                 | 3.04             |        | 3.01        | 7.53  | 3.45  | 2.34             |          |            |                               |                         |             |            |          |         |            |           |
| Shigella spp.              | 0.214            |                 |                 |                  |        |             |       |       | 0.214            |          |            |                               |                         |             |            |          |         |            |           |
| Staphylococcus aureus      | 166              |                 |                 |                  |        |             |       |       | 49               |          | 104        |                               |                         | 143         |            |          |         | 31.8       | 3.09      |
| Streptococcus pneumoniae   | 148              |                 |                 |                  | 29.8   | 58.3        | 29.7  |       | 6.65             |          | 111        |                               |                         | 65.8        |            |          |         | 97.7       |           |
| All pathogens              | 1,150            | 235             | 177             | 255              | 423    | 342         | 429   | 240   | 628              | 0.077    | 243        | 0.281                         | 0.225                   | 143         | 66.6       | 0.027    | 404     | 32.8       | 0.031     |
|                            | Resistance to 1+ | Aminoglycosides | Aminopenicillin | Anti-pseudomonal | BL-BLI | Carbapenems | 3GC   | 4GC   | Fluoroquinolones | Mono INH | Macrolides | MDR in S. Typhi and Paratyphi | MDR excluding XDR in TB | Methicillin | Penicillin | Mono RIF | TMP-SMX | Vancomycin | XDR in TB |

Counts  
<2.5k

# Antigua and Barbuda

DALYs (count) *attributable to bacterial antimicrobial resistance by pathogen–drug combinations, 2019*

|                            |                  |                 |                 |                  |        |             |       |       |                  |          |            |                               |                         |             |            |          |         |            |           |
|----------------------------|------------------|-----------------|-----------------|------------------|--------|-------------|-------|-------|------------------|----------|------------|-------------------------------|-------------------------|-------------|------------|----------|---------|------------|-----------|
| Acinetobacter baumannii    | 63               | 5.71            |                 | 3.17             | 0.142  | 27.1        | 1.39  | 0.2   | 25.3             |          |            |                               |                         |             |            |          |         |            |           |
| Citrobacter spp.           | 2.63             | 0.081           |                 | 0.371            |        | 0.426       | 0.752 | 0.499 | 0.503            |          |            |                               |                         |             |            |          |         |            |           |
| Enterobacter spp.          | 15.9             | 0.906           |                 | 2.73             |        | 4.34        |       | 1.61  | 3.31             |          |            |                               |                         |             |            |          | 3.03    |            |           |
| Enterococcus faecalis      | 6.96             |                 |                 |                  |        |             |       |       | 6.04             |          |            |                               |                         |             |            |          |         | 0.919      |           |
| Enterococcus faecium       | 13.3             |                 |                 |                  |        |             |       |       | 8.72             |          |            |                               |                         |             |            |          |         | 4.59       |           |
| Other enterococci          | 6.42             |                 |                 |                  |        |             |       |       | 5.26             |          |            |                               |                         |             |            |          |         | 1.16       |           |
| Escherichia coli           | 41               | 1.06            | 1.84            |                  | 6.38   | 3.02        | 11.7  |       | 10.4             |          |            |                               |                         |             |            |          |         | 6.59       |           |
| Group A Streptococcus      | 1.09             |                 |                 |                  |        |             |       |       |                  |          | 1.09       |                               |                         |             |            |          |         |            |           |
| Group B Streptococcus      | 2.56             |                 |                 |                  |        |             |       |       | 0.778            |          | 1.62       |                               |                         | 0.154       |            |          |         |            |           |
| Haemophilus influenzae     | 0.77             |                 | 0.439           |                  |        |             |       | 0.331 |                  |          |            |                               |                         |             |            |          |         |            |           |
| Klebsiella pneumoniae      | 31.5             | 2.5             |                 |                  | 3.09   | 3.43        | 11.6  |       | 5.19             |          |            |                               |                         |             |            |          |         | 5.73       |           |
| Morganella spp.            | 0.143            |                 |                 |                  |        |             |       | 0.018 | 0.016            | 0.109    |            |                               |                         |             |            |          |         |            |           |
| Mycobacterium tuberculosis | 0.111            |                 |                 |                  |        |             |       |       |                  | 0.008    |            |                               | 0.083                   |             |            | 0.006    |         |            | 0.014     |
| Neisseria gonorrhoeae      | 0.076            |                 |                 |                  |        |             |       | 0.001 |                  | 0.075    |            |                               |                         |             |            |          |         |            |           |
| Proteus spp.               | 2.65             | 0.077           | 0.419           |                  |        |             |       | 0.915 |                  | 0.726    |            |                               |                         |             |            |          |         | 0.509      |           |
| Pseudomonas aeruginosa     | 21.3             | 0.796           |                 | 1.6              |        | 11.8        | 1.04  | 0.326 | 5.77             |          |            |                               |                         |             |            |          |         |            |           |
| Salmonella Typhi           | 0.3              |                 |                 |                  |        |             |       |       | 0.266            |          |            | 0.034                         |                         |             |            |          |         |            |           |
| Non-typhoidal Salmonella   | 0.078            |                 |                 |                  |        |             |       |       | 0.078            |          |            |                               |                         |             |            |          |         |            |           |
| Serratia spp.              | 2.82             | 0.197           |                 | 0.597            |        | 0.82        | 0.675 | 0.276 | 0.252            |          |            |                               |                         |             |            |          |         |            |           |
| Shigella spp.              | 0.034            |                 |                 |                  |        |             |       |       | 0.034            |          |            |                               |                         |             |            |          |         |            |           |
| Staphylococcus aureus      | 48.2             |                 |                 |                  |        |             |       |       | 2.21             |          | 3.86       |                               |                         | 38.7        |            |          |         | 2.72       | 0.736     |
| Streptococcus pneumoniae   | 30.5             |                 |                 |                  | 0.394  | 12.9        | 0.572 |       | 0.726            |          | 4.57       |                               |                         |             | 3.27       |          |         | 8.08       |           |
| All pathogens              | 291              | 11.3            | 2.7             | 8.47             | 10     | 63.8        | 29    | 2.92  | 75.7             | 0.008    | 11.1       | 0.034                         | 0.083                   | 38.7        | 3.43       | 0.006    | 26.6    | 7.4        | 0.014     |
|                            | Resistance to 1+ | Aminoglycosides | Aminopenicillin | Anti-pseudomonal | BL-BLI | Carbapenems | 3GC   | 4GC   | Fluoroquinolones | Mono INH | Macrolides | MDR in S. Typhi and Paratyphi | MDR excluding XDR in TB | Methicillin | Penicillin | Mono RIF | TMP-SMX | Vancomycin | XDR in TB |

Counts  
<2.5k

# Argentina

DALYs (count) associated with bacterial antimicrobial resistance by pathogen–drug combinations, 2019

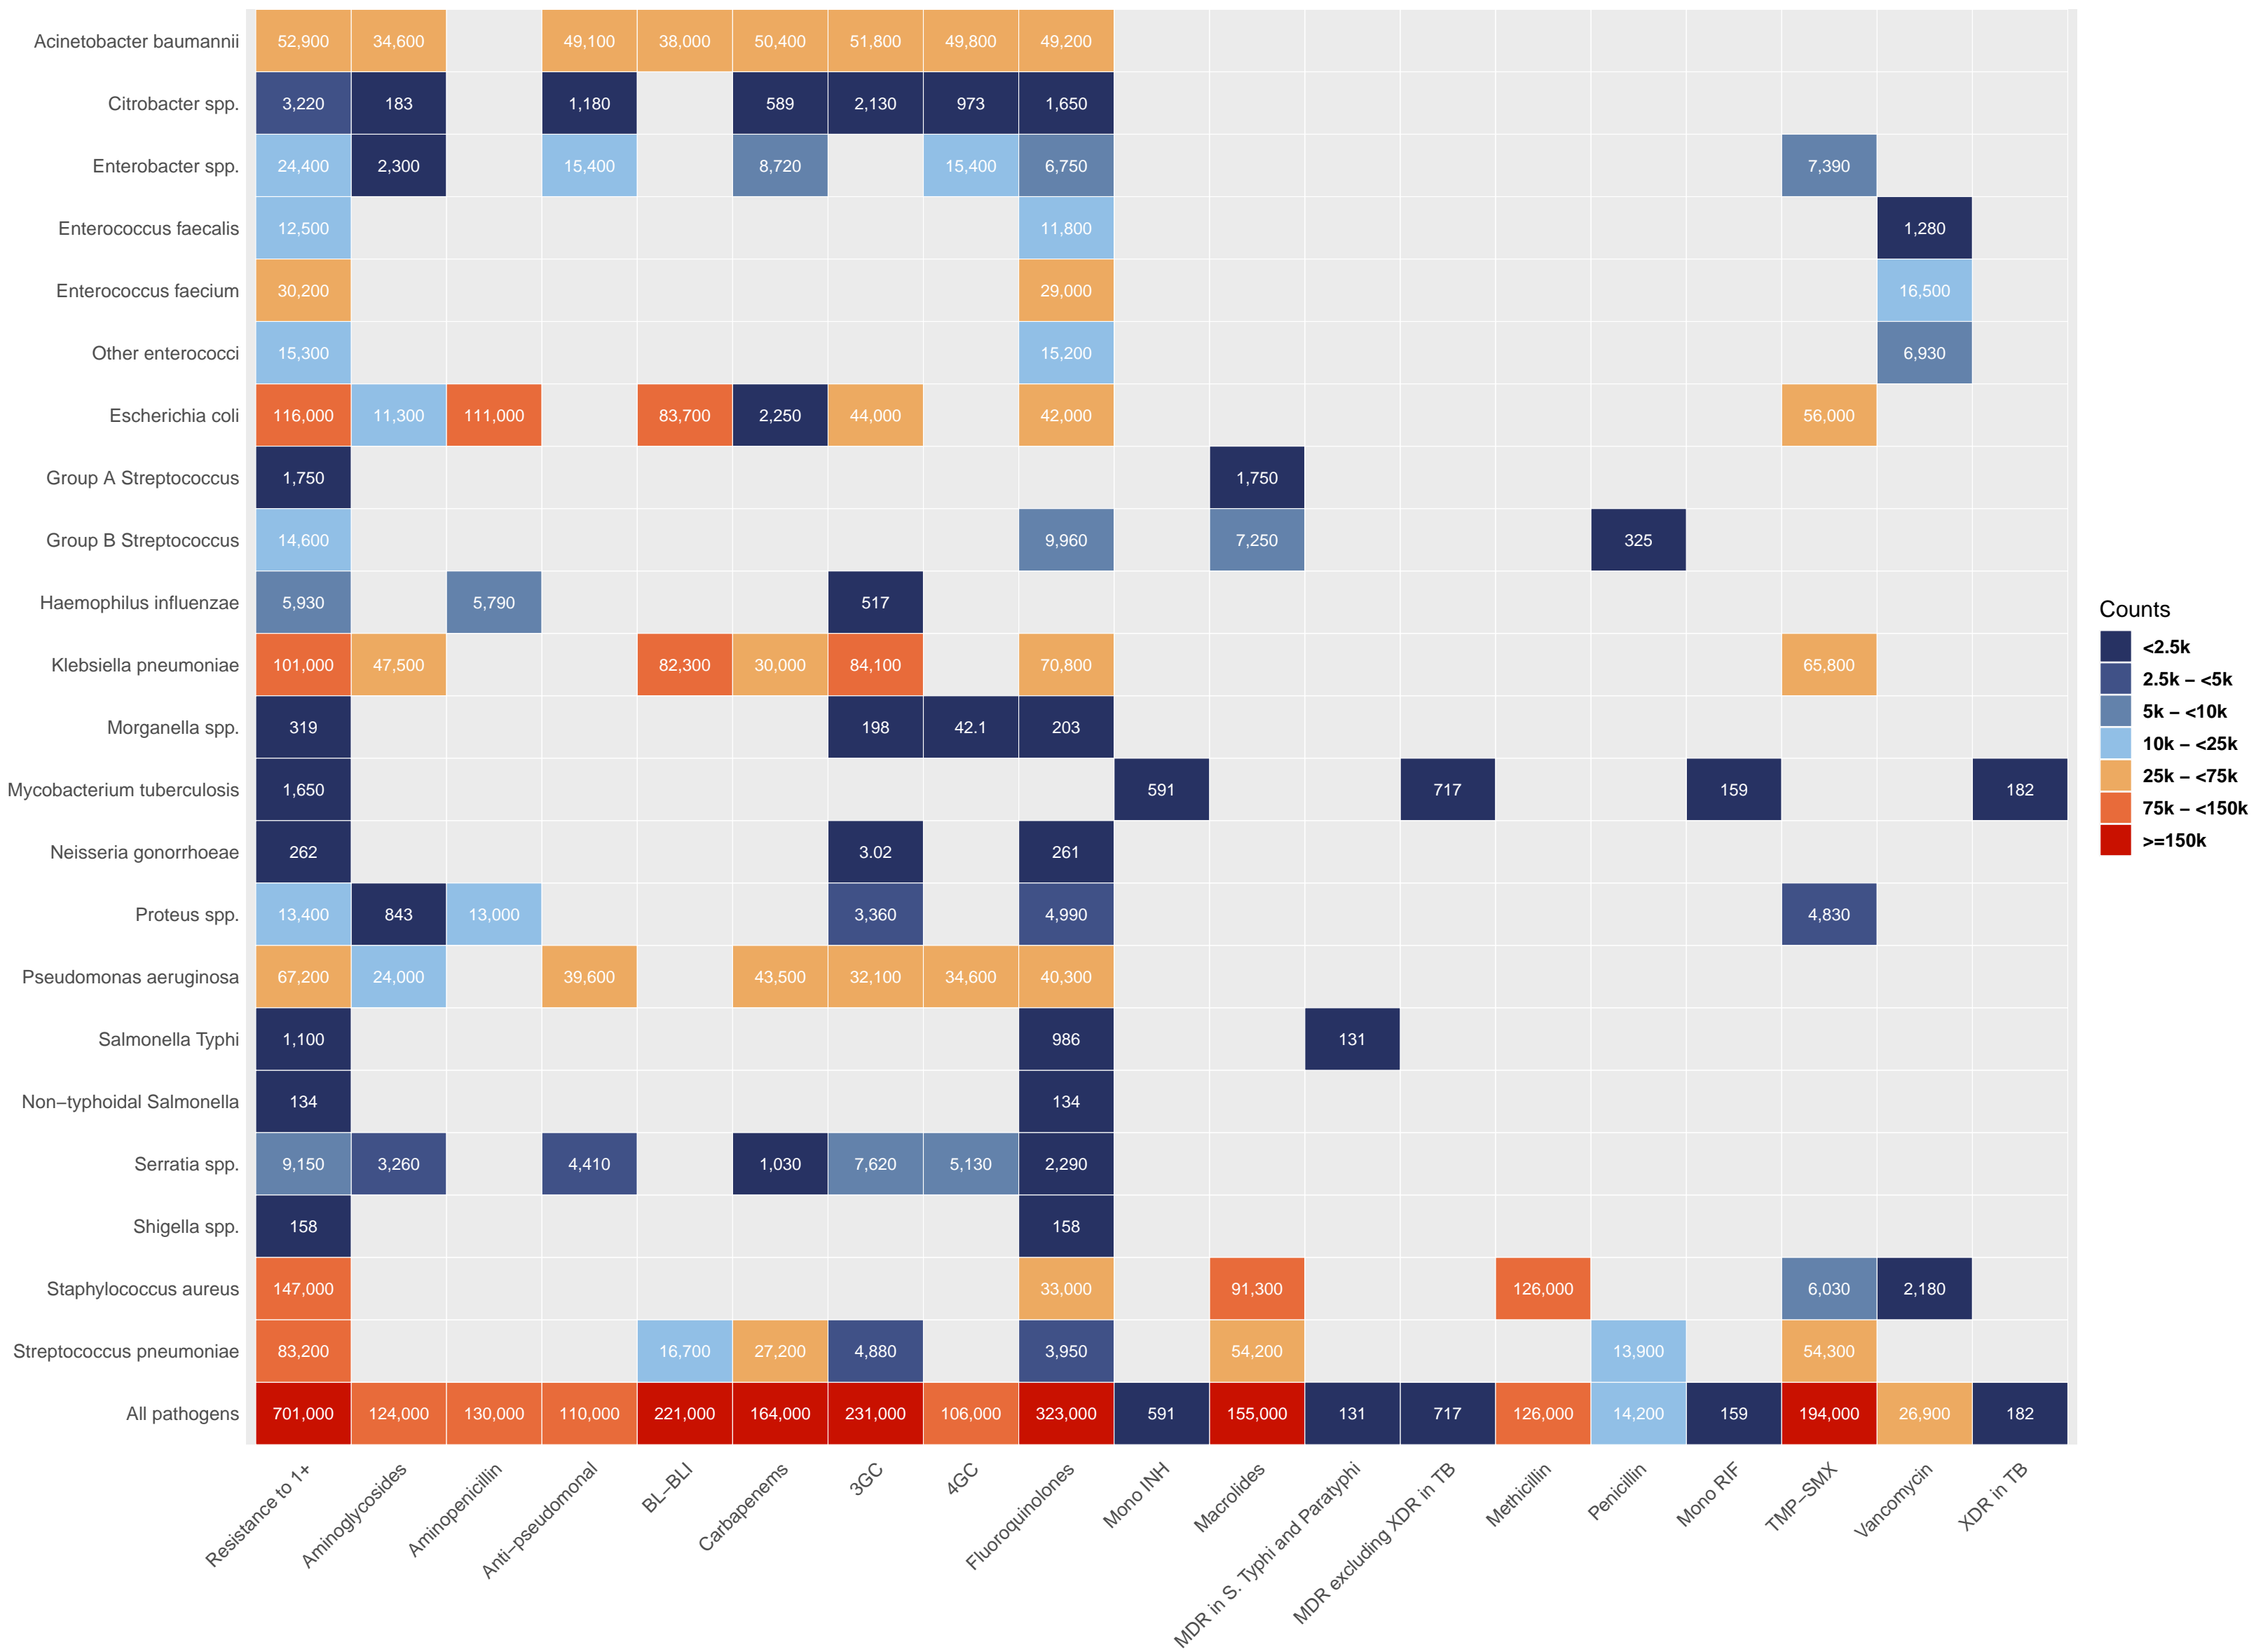

# Argentina

DALYs (count) attributable to bacterial antimicrobial resistance by pathogen–drug combinations, 2019

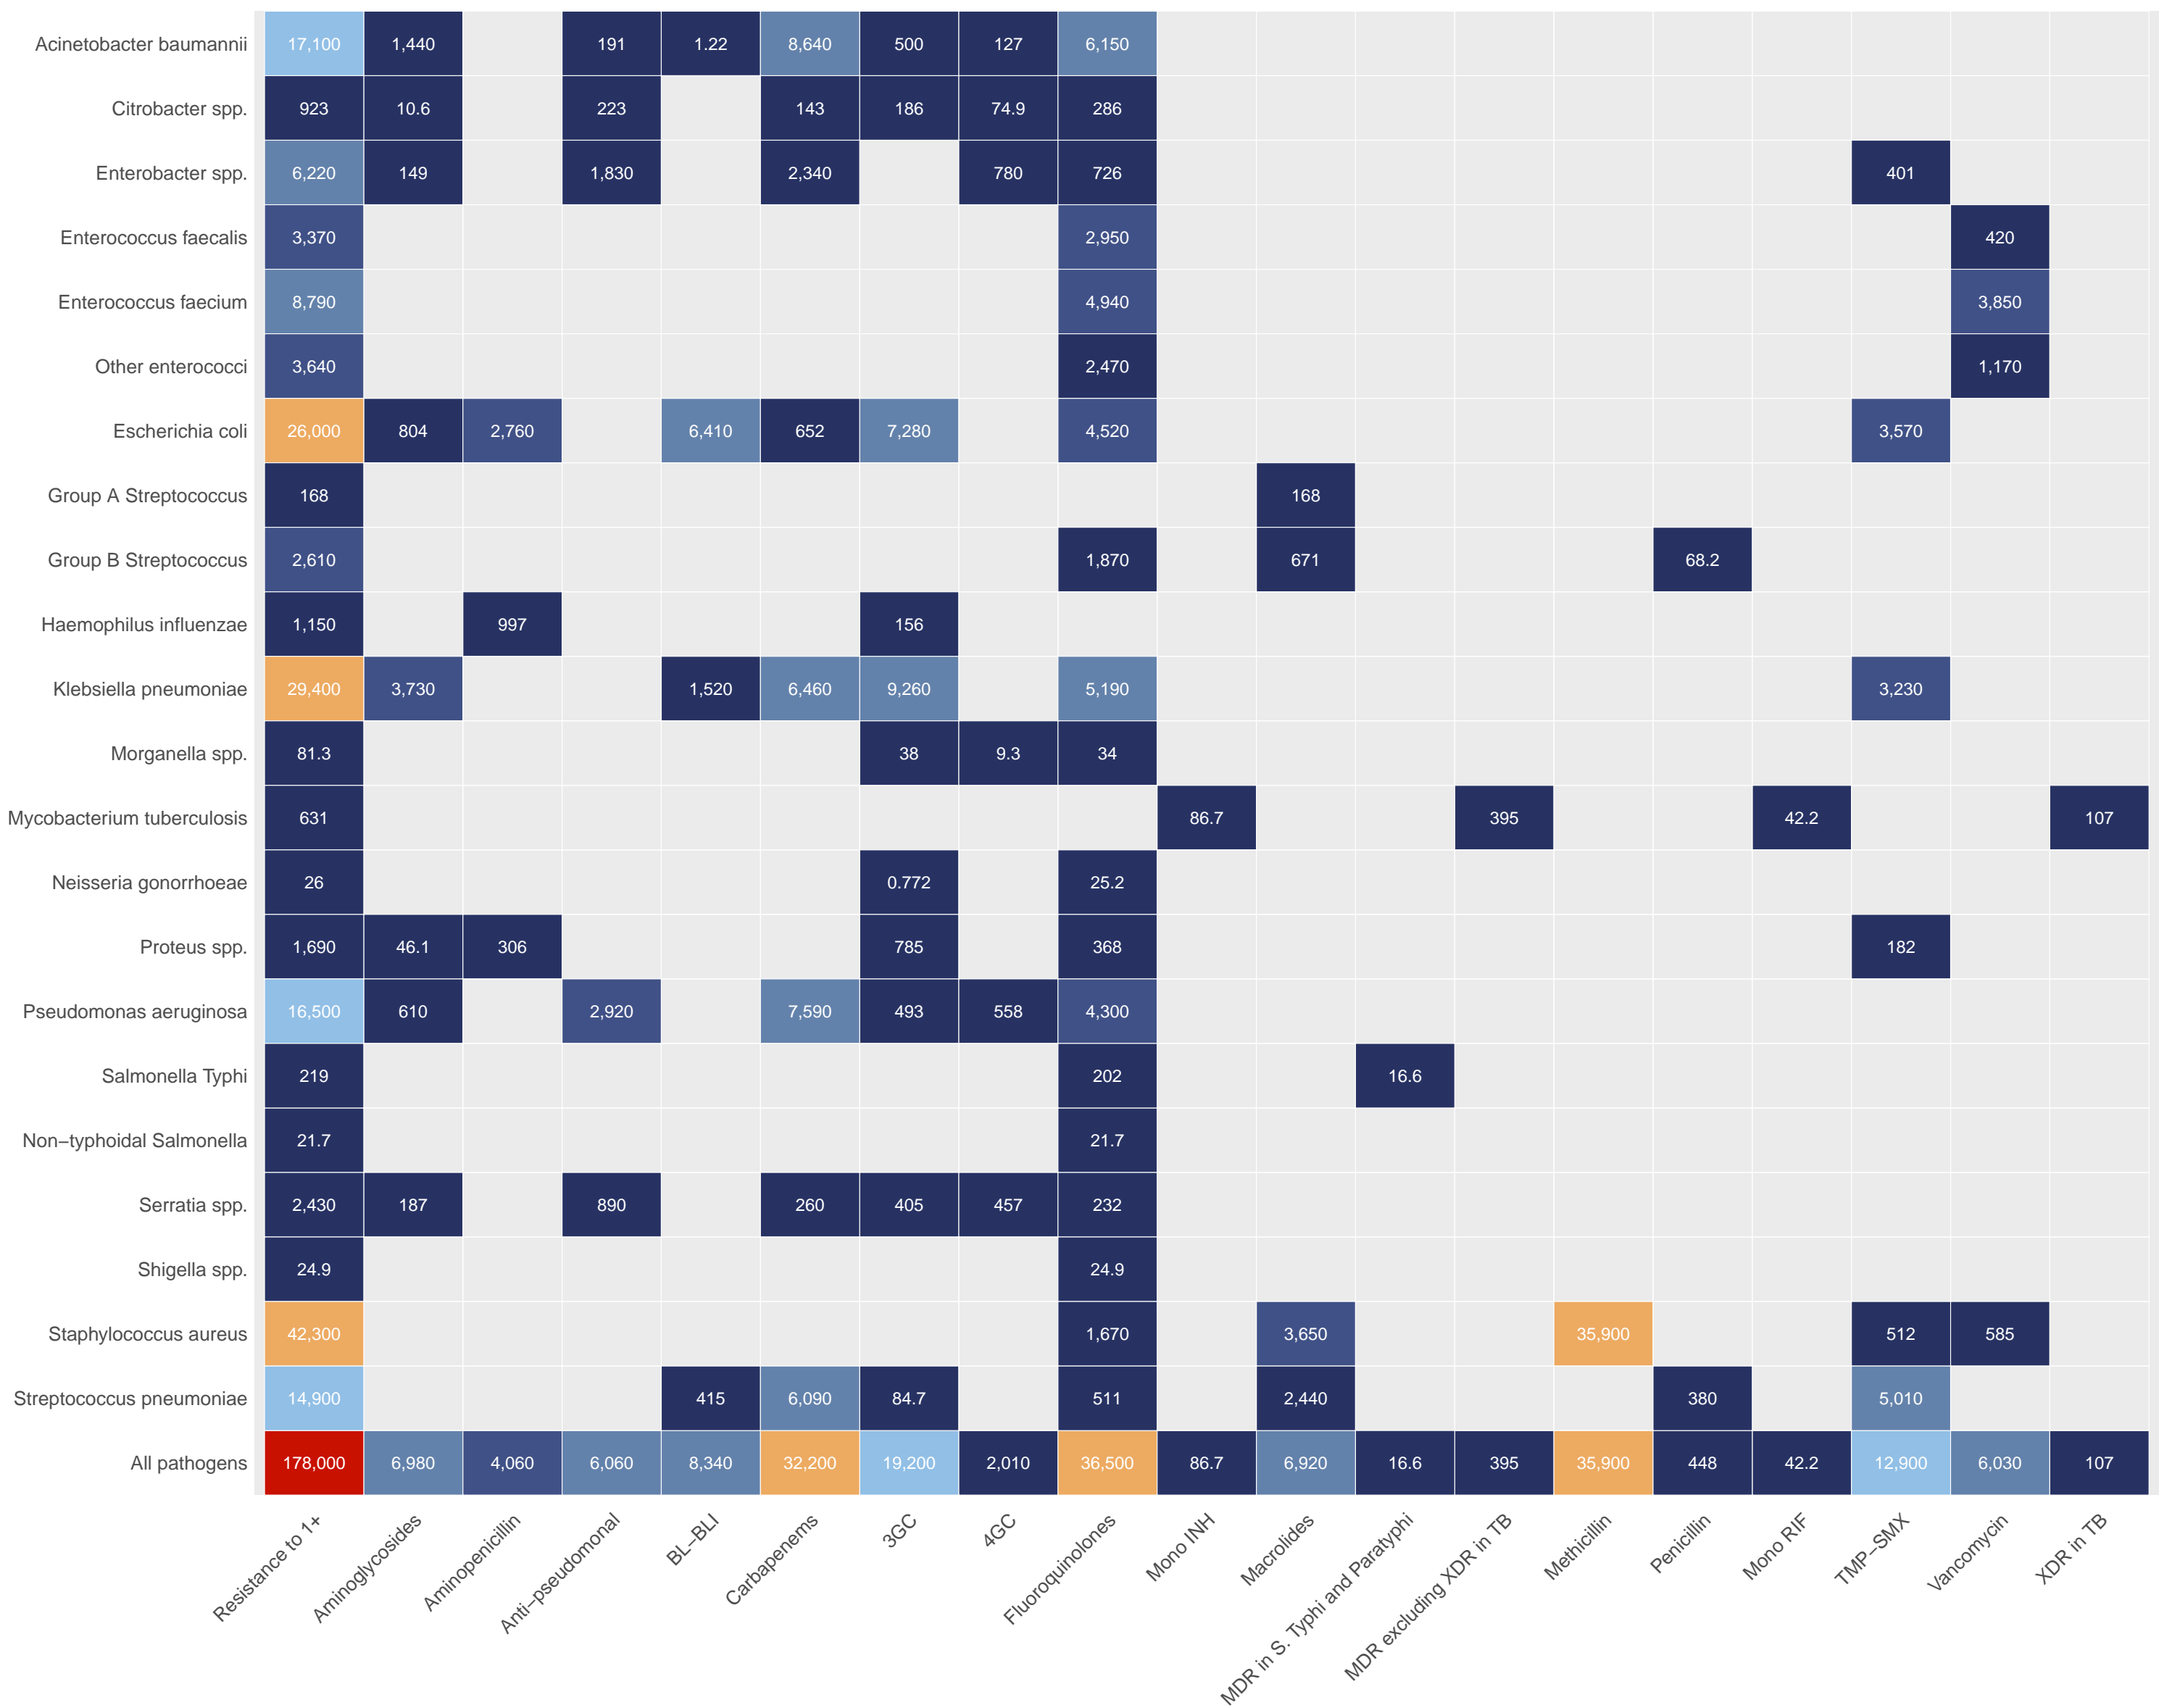

Counts

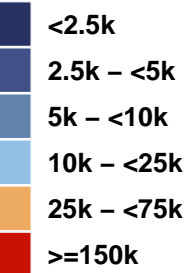

# Barbados

DALYs (count) associated with bacterial antimicrobial resistance by pathogen–drug combinations, 2019

|                            |                  |                 |                 |                  |        |             |       |       |                  |          |            |                               |                         |             |            |          |         |            |           |
|----------------------------|------------------|-----------------|-----------------|------------------|--------|-------------|-------|-------|------------------|----------|------------|-------------------------------|-------------------------|-------------|------------|----------|---------|------------|-----------|
| Acinetobacter baumannii    | 486              | 320             |                 | 442              | 360    | 407         | 406   | 399   | 479              |          |            |                               |                         |             |            |          |         |            |           |
| Citrobacter spp.           | 22.7             | 3.66            |                 | 4.56             |        | 4.38        | 16.8  | 8.29  | 6.59             |          |            |                               |                         |             |            |          |         |            |           |
| Enterobacter spp.          | 181              | 33.9            |                 | 62.3             |        | 46.9        |       | 78.9  | 77.7             |          |            |                               |                         |             |            |          | 120     |            |           |
| Enterococcus faecalis      | 145              |                 |                 |                  |        |             |       |       | 136              |          |            |                               |                         |             |            |          |         | 19.1       |           |
| Enterococcus faecium       | 291              |                 |                 |                  |        |             |       |       | 288              |          |            |                               |                         |             |            |          |         | 106        |           |
| Other enterococci          | 193              |                 |                 |                  |        |             |       |       | 192              |          |            |                               |                         |             |            |          |         | 42.5       |           |
| Escherichia coli           | 1,220            | 107             | 1,120           |                  | 895    | 86.6        | 639   |       | 789              |          |            |                               |                         |             |            |          | 805     |            |           |
| Group A Streptococcus      | 93.8             |                 |                 |                  |        |             |       |       |                  |          | 93.8       |                               |                         |             |            |          |         |            |           |
| Group B Streptococcus      | 117              |                 |                 |                  |        |             |       |       | 31.8             |          | 97.9       |                               |                         | 5.1         |            |          |         |            |           |
| Haemophilus influenzae     | 14.2             |                 | 11.9            |                  |        |             | 4.01  |       |                  |          |            |                               |                         |             |            |          |         |            |           |
| Klebsiella pneumoniae      | 794              | 164             |                 |                  | 631    | 77.4        | 592   |       | 429              |          |            |                               |                         |             |            |          | 597     |            |           |
| Morganella spp.            | 5.06             |                 |                 |                  |        |             | 1.14  | 0.739 | 4.67             |          |            |                               |                         |             |            |          |         |            |           |
| Mycobacterium tuberculosis | 1.05             |                 |                 |                  |        |             |       |       |                  | 0.463    |            |                               | 0.434                   |             |            | 0.09     |         |            | 0.066     |
| Neisseria gonorrhoeae      | 2.4              |                 |                 |                  |        |             | 0.018 |       | 2.4              |          |            |                               |                         |             |            |          |         |            |           |
| Proteus spp.               | 144              | 6.25            | 127             |                  |        |             | 25.4  |       | 68.8             |          |            |                               |                         |             |            |          | 92.1    |            |           |
| Pseudomonas aeruginosa     | 505              | 159             |                 | 225              |        | 363         | 205   | 175   | 302              |          |            |                               |                         |             |            |          |         |            |           |
| Salmonella Typhi           | 16.6             |                 |                 |                  |        |             |       |       | 11.7             |          |            | 6.52                          |                         |             |            |          |         |            |           |
| Non-typhoidal Salmonella   | 1.96             |                 |                 |                  |        |             |       |       | 1.96             |          |            |                               |                         |             |            |          |         |            |           |
| Serratia spp.              | 42.3             | 11.1            |                 | 13.5             |        | 9.77        | 31.4  | 14    | 9.62             |          |            |                               |                         |             |            |          |         |            |           |
| Shigella spp.              | 0.448            |                 |                 |                  |        |             |       |       | 0.448            |          |            |                               |                         |             |            |          |         |            |           |
| Staphylococcus aureus      | 1,200            |                 |                 |                  |        |             |       |       | 360              |          | 755        |                               |                         | 1,040       |            |          | 185     | 23.9       |           |
| Streptococcus pneumoniae   | 564              |                 |                 |                  | 115    | 216         | 193   |       | 24.5             |          | 418        |                               |                         | 181         |            |          | 360     |            |           |
| All pathogens              | 6,040            | 806             | 1,260           | 748              | 2,000  | 1,210       | 2,110 | 675   | 3,220            | 0.463    | 1,360      | 6.52                          | 0.434                   | 1,040       | 186        | 0.09     | 2,160   | 192        | 0.066     |
|                            | Resistance to 1+ | Aminoglycosides | Aminopenicillin | Anti-pseudomonal | BL-BLI | Carbapenems | 3GC   | 4GC   | Fluoroquinolones | Mono INH | Macrolides | MDR in S. Typhi and Paratyphi | MDR excluding XDR in TB | Methicillin | Penicillin | Mono RIF | TMP-SMX | Vancomycin | XDR in TB |

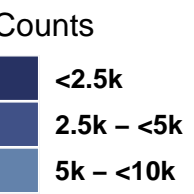

# Barbados

DALYs (count) *attributable to bacterial antimicrobial resistance by pathogen–drug combinations, 2019*

|                            |                  |                 |                 |                  |        |             |      |       |                  |          |            |                               |                         |             |            |          |         |            |           |
|----------------------------|------------------|-----------------|-----------------|------------------|--------|-------------|------|-------|------------------|----------|------------|-------------------------------|-------------------------|-------------|------------|----------|---------|------------|-----------|
| Acinetobacter baumannii    | 154              | 13.4            |                 | 7.47             | 0.32   | 66          | 3.48 | 0.499 | 62.5             |          |            |                               |                         |             |            |          |         |            |           |
| Citrobacter spp.           | 6.54             | 0.225           |                 | 0.992            |        | 1.14        | 2.24 | 0.92  | 1.02             |          |            |                               |                         |             |            |          |         |            |           |
| Enterobacter spp.          | 40.5             | 2.13            |                 | 6.09             |        | 11.4        |      | 4.01  | 9.23             |          |            |                               |                         |             |            |          | 7.59    |            |           |
| Enterococcus faecalis      | 39.4             |                 |                 |                  |        |             |      |       | 33.4             |          |            |                               |                         |             |            |          |         | 6          |           |
| Enterococcus faecium       | 77.5             |                 |                 |                  |        |             |      |       | 53               |          |            |                               |                         |             |            |          |         | 24.5       |           |
| Other enterococci          | 42               |                 |                 |                  |        |             |      |       | 34.8             |          |            |                               |                         |             |            |          |         | 7.22       |           |
| Escherichia coli           | 304              | 6.85            | 15.1            |                  | 41.1   | 19          | 87.5 |       | 88               |          |            |                               |                         |             |            |          |         | 46.9       |           |
| Group A Streptococcus      | 8.99             |                 |                 |                  |        |             |      |       |                  |          | 8.99       |                               |                         |             |            |          |         |            |           |
| Group B Streptococcus      | 16.5             |                 |                 |                  |        |             |      |       | 5.55             |          | 9.9        |                               |                         | 1.05        |            |          |         |            |           |
| Haemophilus influenzae     | 3.06             |                 | 1.88            |                  |        |             |      | 1.18  |                  |          |            |                               |                         |             |            |          |         |            |           |
| Klebsiella pneumoniae      | 206              | 14.3            |                 |                  | 15.5   | 21.1        | 90.1 |       | 31.7             |          |            |                               |                         |             |            |          |         | 33.4       |           |
| Morganella spp.            | 1.14             |                 |                 |                  |        |             |      | 0.144 | 0.127            | 0.87     |            |                               |                         |             |            |          |         |            |           |
| Mycobacterium tuberculosis | 0.332            |                 |                 |                  |        |             |      |       |                  | 0.06     |            |                               | 0.215                   |             |            | 0.022    |         |            | 0.036     |
| Neisseria gonorrhoeae      | 0.237            |                 |                 |                  |        |             |      | 0.005 | 0.232            |          |            |                               |                         |             |            |          |         |            |           |
| Proteus spp.               | 17.7             | 0.398           | 2.9             |                  |        |             |      | 5.82  | 5.05             |          |            |                               |                         |             |            |          |         | 3.57       |           |
| Pseudomonas aeruginosa     | 120              | 4.04            |                 | 11.5             |        | 63.8        | 5.74 | 2.2   | 32.8             |          |            |                               |                         |             |            |          |         |            |           |
| Salmonella Typhi           | 3.07             |                 |                 |                  |        |             |      |       | 2.3              |          |            | 0.764                         |                         |             |            |          |         |            |           |
| Non-typhoidal Salmonella   | 0.219            |                 |                 |                  |        |             |      |       | 0.219            |          |            |                               |                         |             |            |          |         |            |           |
| Serratia spp.              | 11.2             | 0.679           |                 | 2.79             |        | 2.65        | 2.82 | 1.19  | 1.05             |          |            |                               |                         |             |            |          |         |            |           |
| Shigella spp.              | 0.065            |                 |                 |                  |        |             |      |       | 0.065            |          |            |                               |                         |             |            |          |         |            |           |
| Staphylococcus aureus      | 350              |                 |                 |                  |        |             |      |       | 16.4             |          | 28.3       |                               |                         | 284         |            |          |         | 15.8       | 5.62      |
| Streptococcus pneumoniae   | 117              |                 |                 |                  | 0.946  | 48.5        | 11.3 |       | 2.69             |          | 17.7       |                               |                         |             | 5.65       |          |         | 30.2       |           |
| All pathogens              | 1,520            | 42              | 19.9            | 28.9             | 57.9   | 234         | 210  | 8.94  | 381              | 0.06     | 64.9       | 0.764                         | 0.215                   | 284         | 6.7        | 0.022    | 137     | 43.3       | 0.036     |
|                            | Resistance to 1+ | Aminoglycosides | Aminopenicillin | Anti-pseudomonal | BL-BLI | Carbapenems | 3GC  | 4GC   | Fluoroquinolones | Mono INH | Macrolides | MDR in S. Typhi and Paratyphi | MDR excluding XDR in TB | Methicillin | Penicillin | Mono RIF | TMP-SMX | Vancomycin | XDR in TB |

Counts  
 <2.5k

# Belize

DALYs (count) associated with bacterial antimicrobial resistance by pathogen–drug combinations, 2019

|                            |                  |                 |                 |                  |        |             |       |       |                  |          |            |                               |                         |             |            |          |         |            |           |
|----------------------------|------------------|-----------------|-----------------|------------------|--------|-------------|-------|-------|------------------|----------|------------|-------------------------------|-------------------------|-------------|------------|----------|---------|------------|-----------|
| Acinetobacter baumannii    | 743              | 468             |                 | 678              | 620    | 609         | 692   | 657   | 604              |          |            |                               |                         |             |            |          |         |            |           |
| Citrobacter spp.           | 56               | 3.91            |                 | 17.8             |        | 8.89        | 38.1  | 25.7  | 22.3             |          |            |                               |                         |             |            |          |         |            |           |
| Enterobacter spp.          | 373              | 63.4            |                 | 139              |        | 80          |       | 209   | 181              |          |            |                               |                         |             |            |          | 237     |            |           |
| Enterococcus faecalis      | 104              |                 |                 |                  |        |             |       |       | 95.4             |          |            |                               |                         |             |            |          |         | 18.1       |           |
| Enterococcus faecium       | 200              |                 |                 |                  |        |             |       |       | 199              |          |            |                               |                         |             |            |          |         | 65.7       |           |
| Other enterococci          | 125              |                 |                 |                  |        |             |       |       | 125              |          |            |                               |                         |             |            |          |         | 5.96       |           |
| Escherichia coli           | 777              | 149             | 754             |                  | 635    | 54.4        | 338   |       | 416              |          |            |                               |                         |             |            |          | 534     |            |           |
| Group A Streptococcus      | 37.6             |                 |                 |                  |        |             |       |       |                  |          | 37.6       |                               |                         |             |            |          |         |            |           |
| Group B Streptococcus      | 134              |                 |                 |                  |        |             |       |       | 32.4             |          | 116        |                               |                         |             | 10.7       |          |         |            |           |
| Haemophilus influenzae     | 16.5             |                 | 9.38            |                  |        |             |       | 9.37  |                  |          |            |                               |                         |             |            |          |         |            |           |
| Klebsiella pneumoniae      | 687              | 278             |                 |                  | 583    | 46.5        | 485   |       | 399              |          |            |                               |                         |             |            |          | 535     |            |           |
| Morganella spp.            | 2.71             |                 |                 |                  |        |             | 0.591 | 0.532 | 2.47             |          |            |                               |                         |             |            |          |         |            |           |
| Mycobacterium tuberculosis | 11.2             |                 |                 |                  |        |             |       |       |                  | 2.39     |            |                               | 6.34                    |             |            | 1.5      |         |            | 1.02      |
| Neisseria gonorrhoeae      | 3.16             |                 |                 |                  |        |             |       | 0.029 | 3.15             |          |            |                               |                         |             |            |          |         |            |           |
| Proteus spp.               | 75               | 4.46            | 66.7            |                  |        |             |       | 13.2  | 23               |          |            |                               |                         |             |            |          | 49.3    |            |           |
| Pseudomonas aeruginosa     | 397              | 183             |                 | 206              |        | 263         | 205   | 153   | 184              |          |            |                               |                         |             |            |          |         |            |           |
| Salmonella Typhi           | 19.7             |                 |                 |                  |        |             |       |       | 17.2             |          |            | 2.99                          |                         |             |            |          |         |            |           |
| Non-typhoidal Salmonella   | 1.11             |                 |                 |                  |        |             |       |       | 1.11             |          |            |                               |                         |             |            |          |         |            |           |
| Serratia spp.              | 63.7             | 20.4            |                 | 20.9             |        | 16.7        | 38.7  | 20.3  | 22.8             |          |            |                               |                         |             |            |          |         |            |           |
| Shigella spp.              | 2.2              |                 |                 |                  |        |             |       |       | 2.2              |          |            |                               |                         |             |            |          |         |            |           |
| Staphylococcus aureus      | 641              |                 |                 |                  |        |             |       |       | 215              |          | 373        |                               |                         | 543         |            |          |         | 129        | 11.3      |
| Streptococcus pneumoniae   | 840              |                 |                 |                  | 184    | 218         | 139   |       | 45               |          | 397        |                               |                         |             | 376        |          |         | 667        |           |
| All pathogens              | 5,310            | 1,170           | 830             | 1,060            | 2,020  | 1,300       | 1,960 | 1,070 | 2,590            | 2.39     | 924        | 2.99                          | 6.34                    | 543         | 386        | 1.5      | 2,150   | 101        | 1.02      |
|                            | Resistance to 1+ | Aminoglycosides | Aminopenicillin | Anti-pseudomonal | BL-BLI | Carbapenems | 3GC   | 4GC   | Fluoroquinolones | Mono INH | Macrolides | MDR in S. Typhi and Paratyphi | MDR excluding XDR in TB | Methicillin | Penicillin | Mono RIF | TMP-SMX | Vancomycin | XDR in TB |



# Belize

DALYs (count) *attributable* to bacterial antimicrobial resistance by pathogen–drug combinations, 2019

|                            |                  |                 |                 |                  |        |             |       |       |                  |          |            |                               |                         |             |            |          |         |            |           |
|----------------------------|------------------|-----------------|-----------------|------------------|--------|-------------|-------|-------|------------------|----------|------------|-------------------------------|-------------------------|-------------|------------|----------|---------|------------|-----------|
| Acinetobacter baumannii    | 234              | 19.9            |                 | 20.2             | 1.85   | 103         | 12.3  | 2.7   | 74.9             |          |            |                               |                         |             |            |          |         |            |           |
| Citrobacter spp.           | 15.9             | 0.21            |                 | 3.53             |        | 2.19        | 3.57  | 2.77  | 3.63             |          |            |                               |                         |             |            |          |         |            |           |
| Enterobacter spp.          | 84.9             | 3.73            |                 | 14               |        | 18.3        |       | 13.5  | 21.4             |          |            |                               |                         |             |            |          | 14      |            |           |
| Enterococcus faecalis      | 29.1             |                 |                 |                  |        |             |       |       | 23.3             |          |            |                               |                         |             |            |          |         | 5.85       |           |
| Enterococcus faecium       | 52.4             |                 |                 |                  |        |             |       |       | 37.2             |          |            |                               |                         |             |            |          |         | 15.3       |           |
| Other enterococci          | 25.3             |                 |                 |                  |        |             |       |       | 24.2             |          |            |                               |                         |             |            |          |         | 1.09       |           |
| Escherichia coli           | 186              | 9.09            | 10              |                  | 35.1   | 12          | 45.1  |       | 42.8             |          |            |                               |                         |             |            |          | 31.8    |            |           |
| Group A Streptococcus      | 3.58             |                 |                 |                  |        |             |       |       |                  |          | 3.58       |                               |                         |             |            |          |         |            |           |
| Group B Streptococcus      | 19               |                 |                 |                  |        |             |       |       | 5.49             |          | 11.6       |                               |                         | 1.95        |            |          |         |            |           |
| Haemophilus influenzae     | 4.1              |                 | 1.34            |                  |        |             | 2.76  |       |                  |          |            |                               |                         |             |            |          |         |            |           |
| Klebsiella pneumoniae      | 173              | 21              |                 |                  | 16.5   | 12.8        | 68    |       | 27.1             |          |            |                               |                         |             |            |          | 27.8    |            |           |
| Morganella spp.            | 0.607            |                 |                 |                  |        |             | 0.066 | 0.089 | 0.452            |          |            |                               |                         |             |            |          |         |            |           |
| Mycobacterium tuberculosis | 4.88             |                 |                 |                  |        |             |       |       |                  | 0.35     |            |                               | 3.53                    |             |            | 0.398    |         |            | 0.597     |
| Neisseria gonorrhoeae      | 0.313            |                 |                 |                  |        |             | 0.008 |       | 0.305            |          |            |                               |                         |             |            |          |         |            |           |
| Proteus spp.               | 8.66             | 0.276           | 1.57            |                  |        |             | 3.15  |       | 1.64             |          |            |                               |                         |             |            |          | 2.03    |            |           |
| Pseudomonas aeruginosa     | 96.2             | 5.07            |                 | 14.3             |        | 48.2        | 7.35  | 2.16  | 19.1             |          |            |                               |                         |             |            |          |         |            |           |
| Salmonella Typhi           | 3.93             |                 |                 |                  |        |             |       |       | 3.55             |          |            | 0.377                         |                         |             |            |          |         |            |           |
| Non-typhoidal Salmonella   | 0.203            |                 |                 |                  |        |             |       |       | 0.203            |          |            |                               |                         |             |            |          |         |            |           |
| Serratia spp.              | 16               | 1.19            |                 | 3.85             |        | 4.38        | 2.59  | 1.41  | 2.58             |          |            |                               |                         |             |            |          |         |            |           |
| Shigella spp.              | 0.407            |                 |                 |                  |        |             |       |       | 0.407            |          |            |                               |                         |             |            |          |         |            |           |
| Staphylococcus aureus      | 185              |                 |                 |                  |        |             |       |       | 9.63             |          | 14         |                               | 147                     |             |            |          | 11.5    | 2.89       |           |
| Streptococcus pneumoniae   | 166              |                 |                 |                  | 5.19   | 47.3        | 6.19  |       | 5.32             |          | 15.6       |                               |                         | 25.5        |            |          | 60.5    |            |           |
| All pathogens              | 1,310            | 60.4            | 12.9            | 56               | 58.7   | 248         | 151   | 22.6  | 303              | 0.35     | 44.7       | 0.377                         | 3.53                    | 147         | 27.5       | 0.398    | 148     | 25.1       | 0.597     |
|                            | Resistance to 1+ | Aminoglycosides | Aminopenicillin | Anti-pseudomonal | BL-BLI | Carbapenems | 3GC   | 4GC   | Fluoroquinolones | Mono INH | Macrolides | MDR in S. Typhi and Paratyphi | MDR excluding XDR in TB | Methicillin | Penicillin | Mono RIF | TMP-SMX | Vancomycin | XDR in TB |

Counts  
  <2.5k



# Bolivia

DALYs (count) associated with bacterial antimicrobial resistance by pathogen–drug combinations, 2019

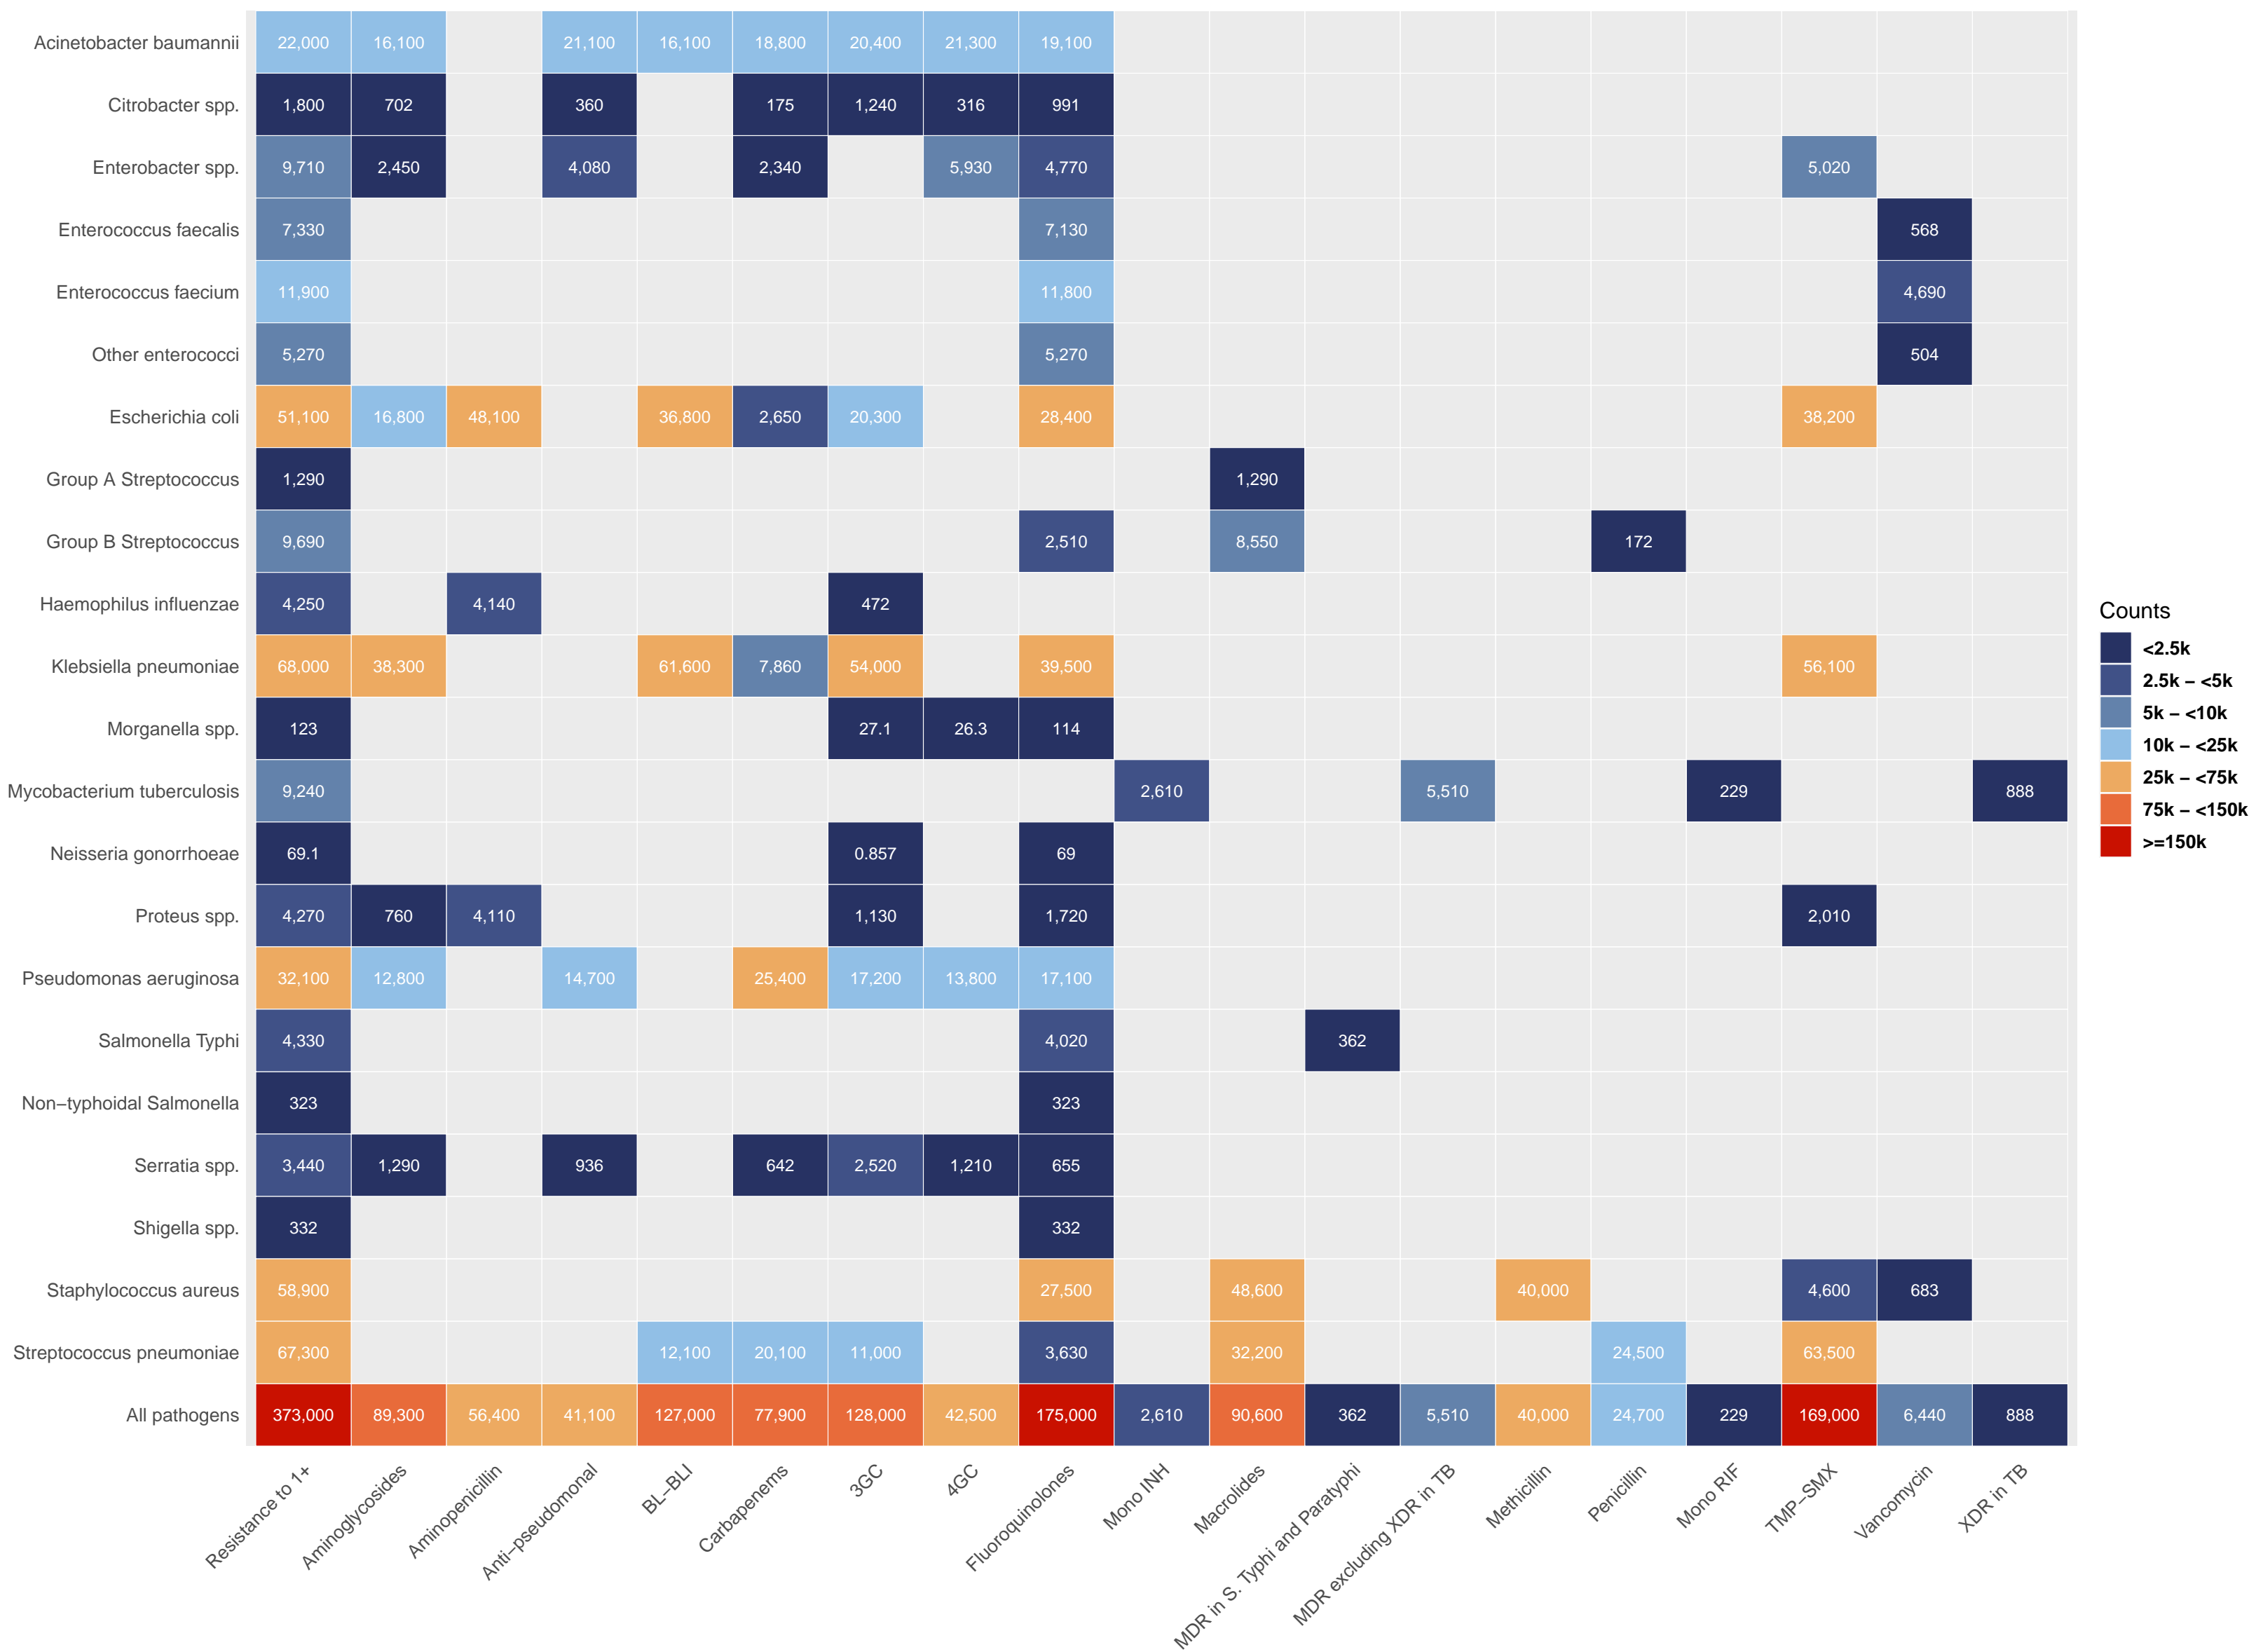

# Bolivia

DALYs (count) *attributable to bacterial antimicrobial resistance by pathogen–drug combinations, 2019*

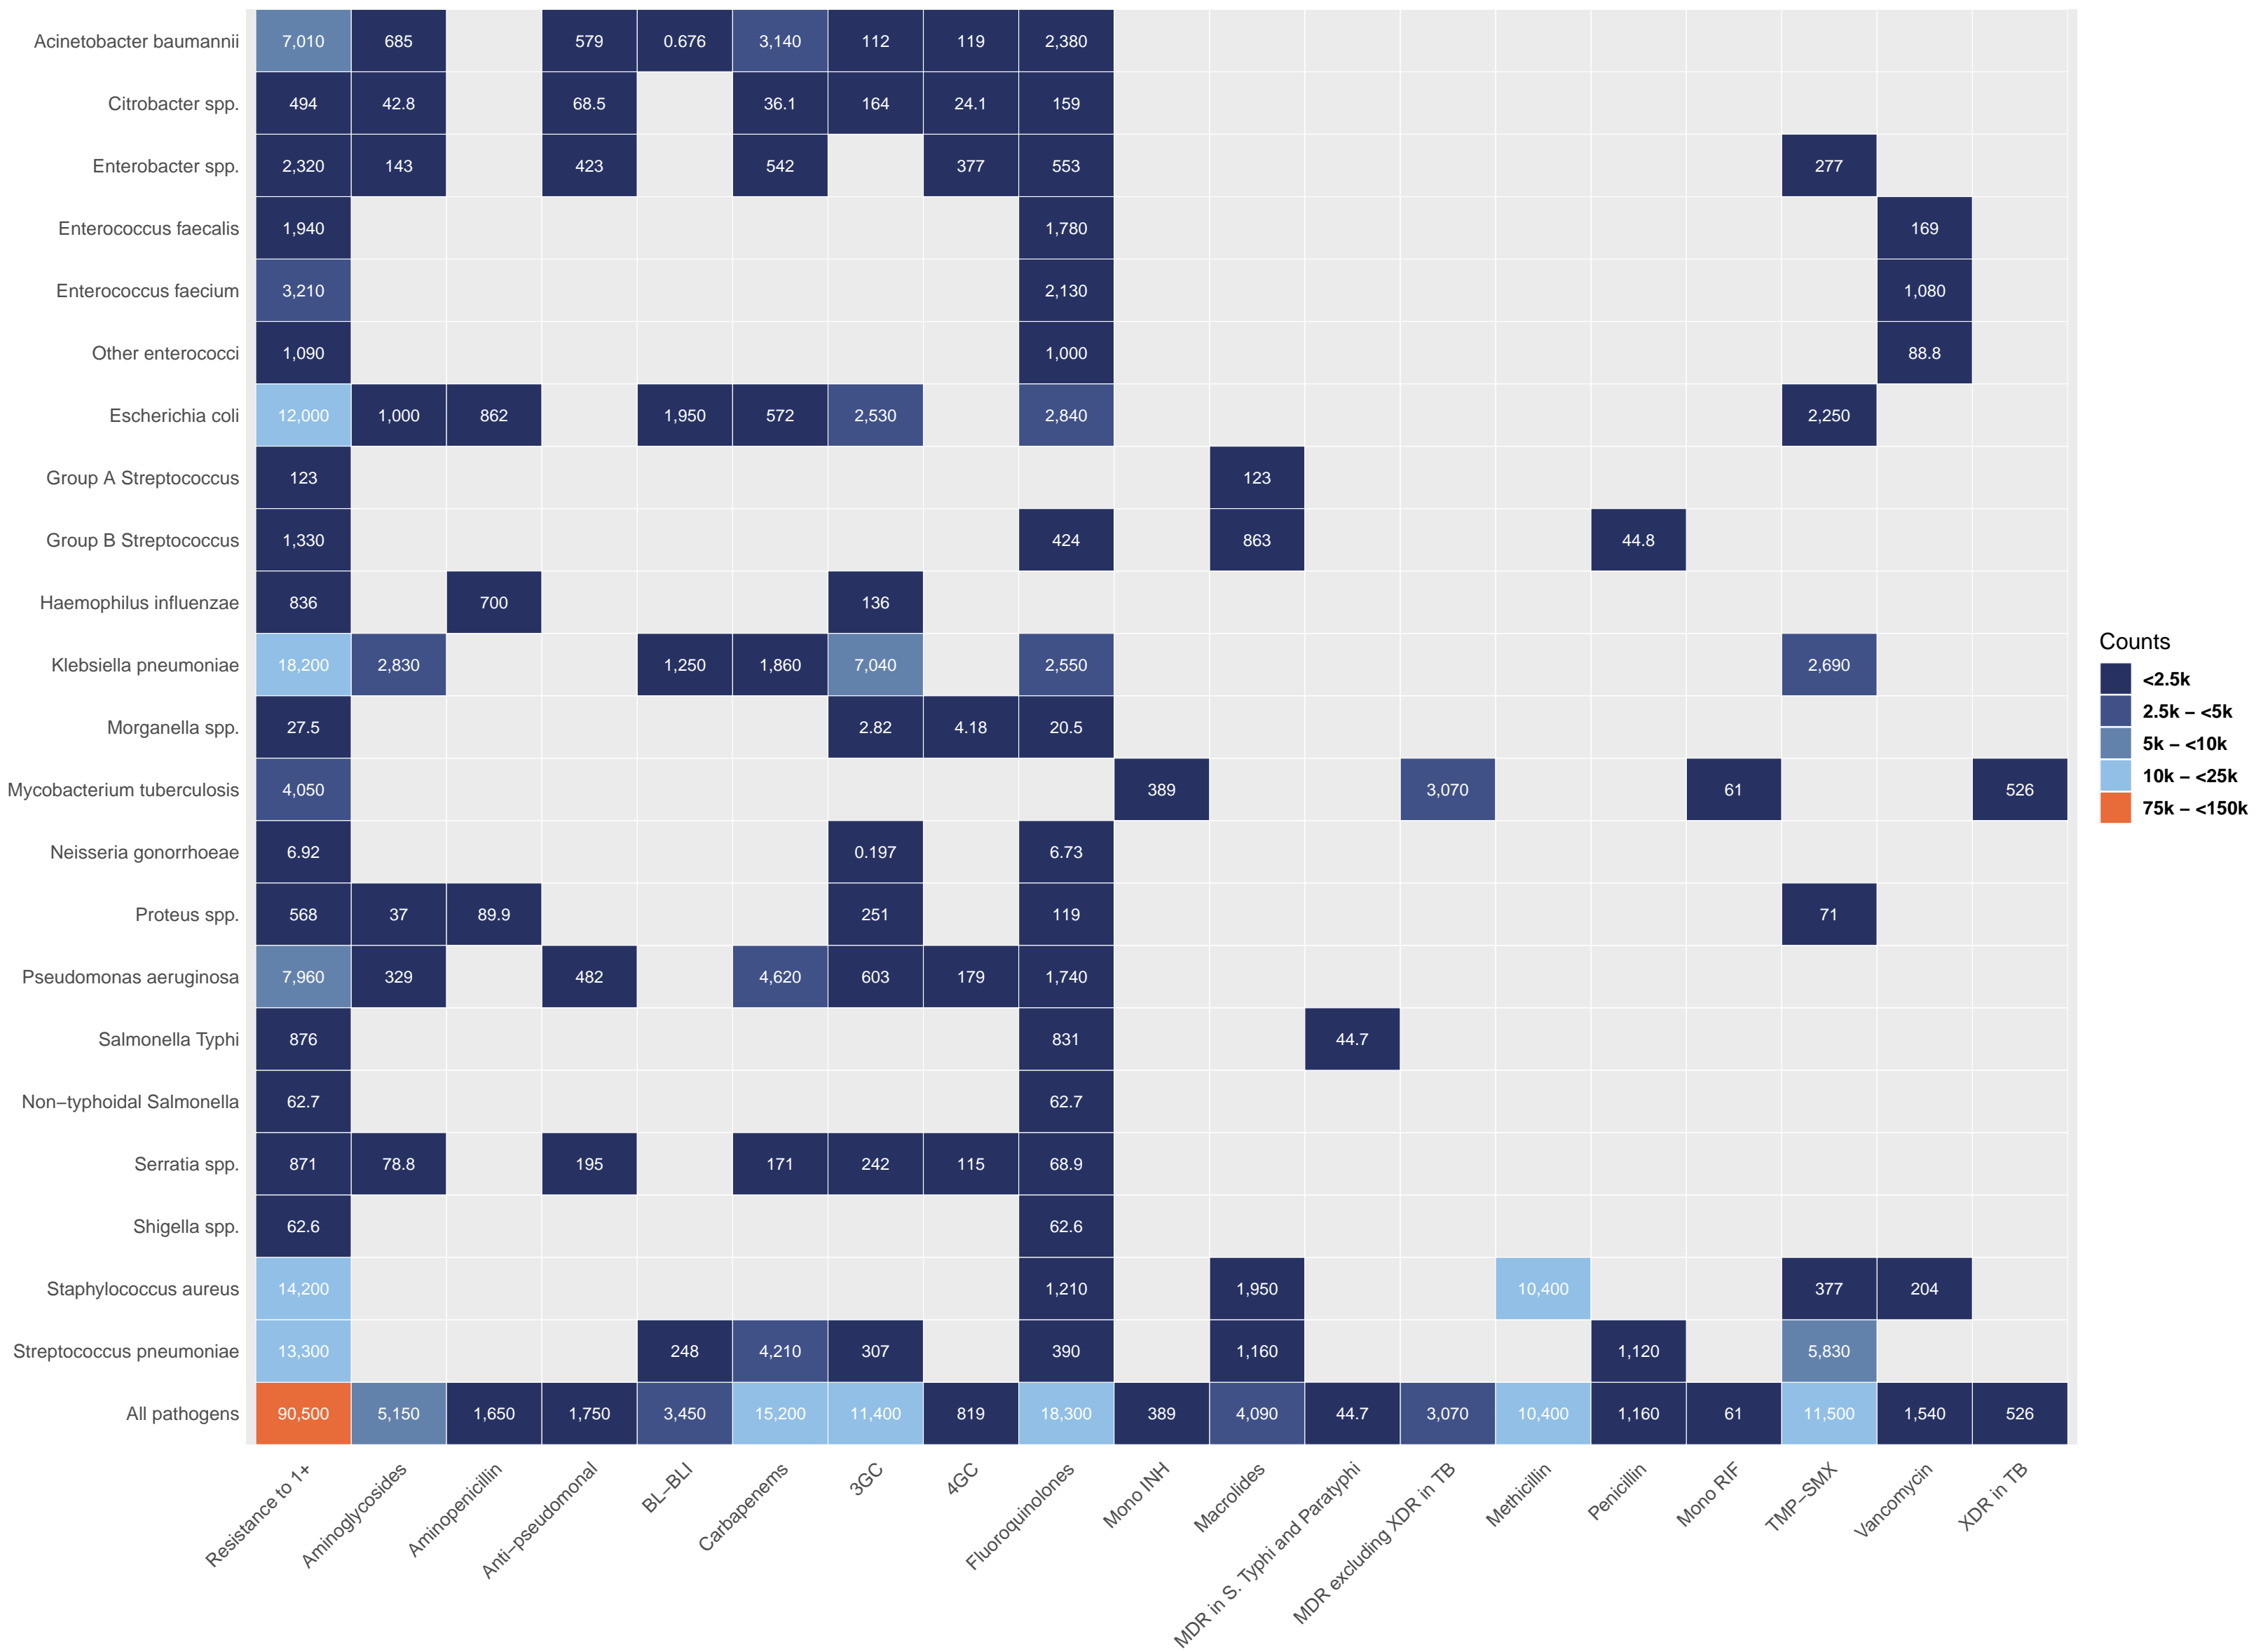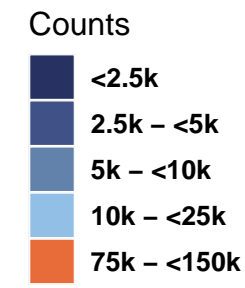

# Brazil

DALYs (count) associated with bacterial antimicrobial resistance by pathogen–drug combinations, 2019

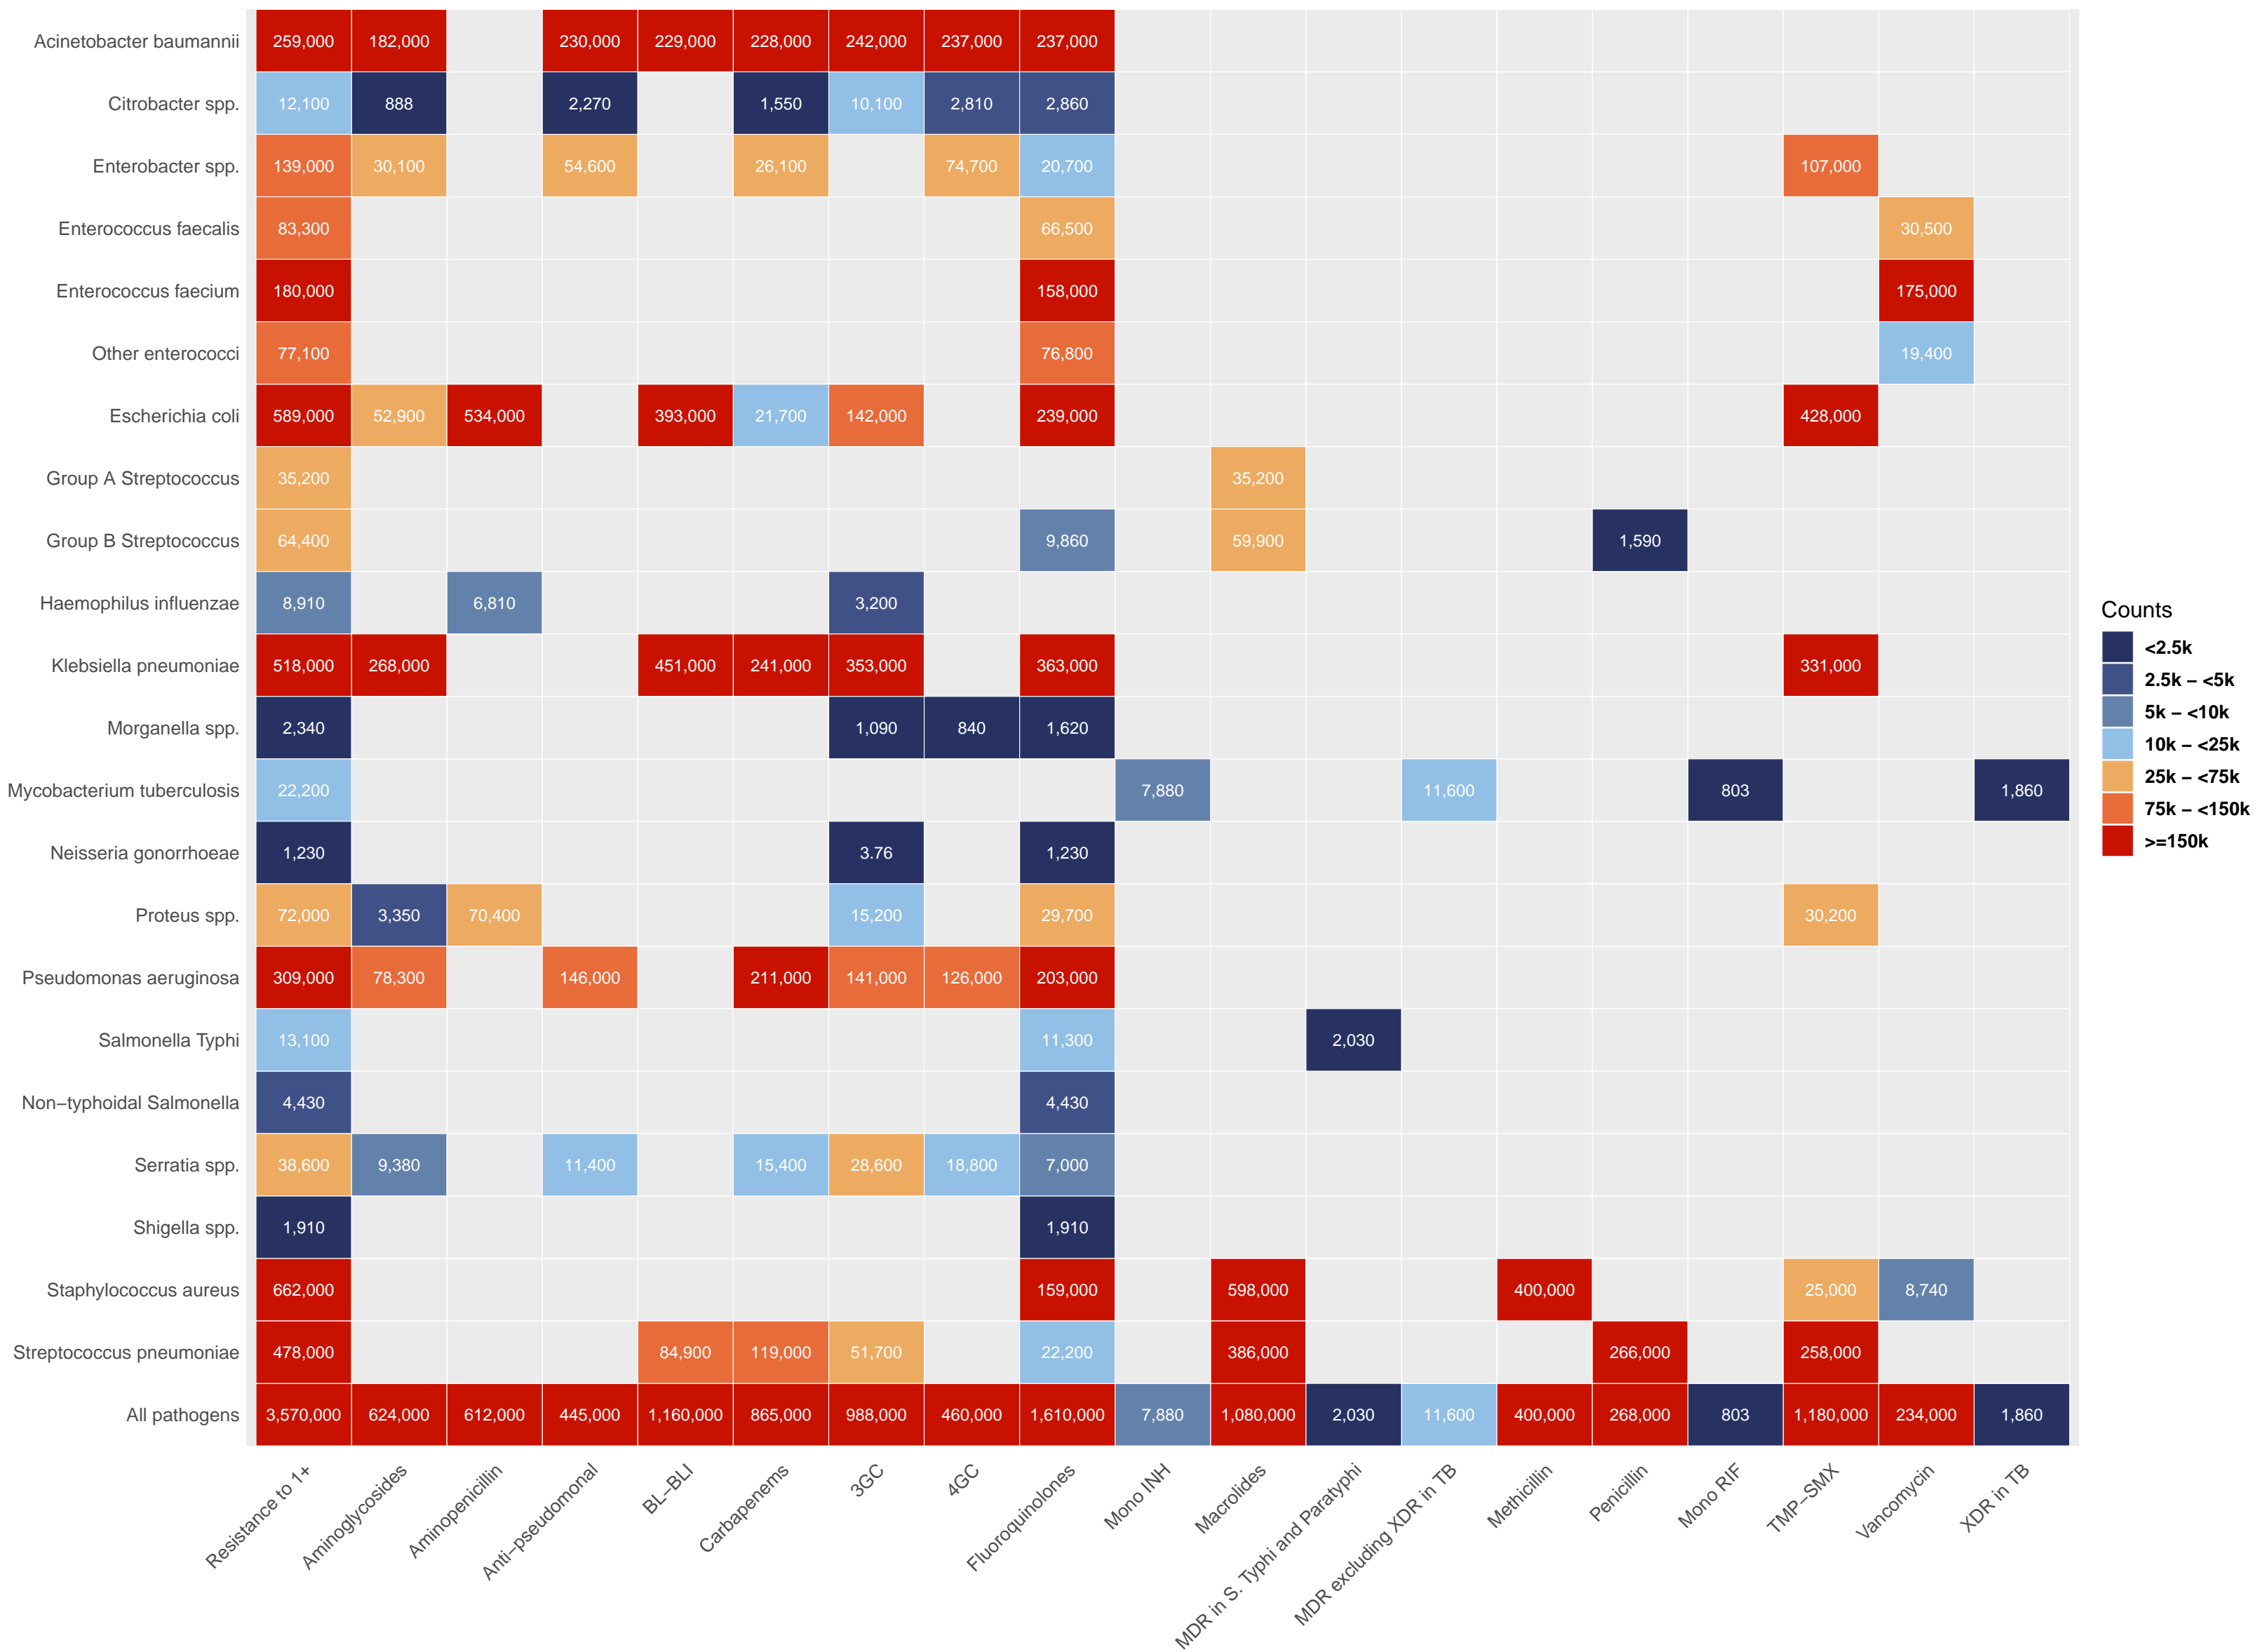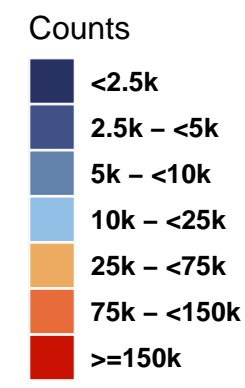

# Brazil

DALYs (count) *attributable to bacterial antimicrobial resistance by pathogen–drug combinations, 2019*

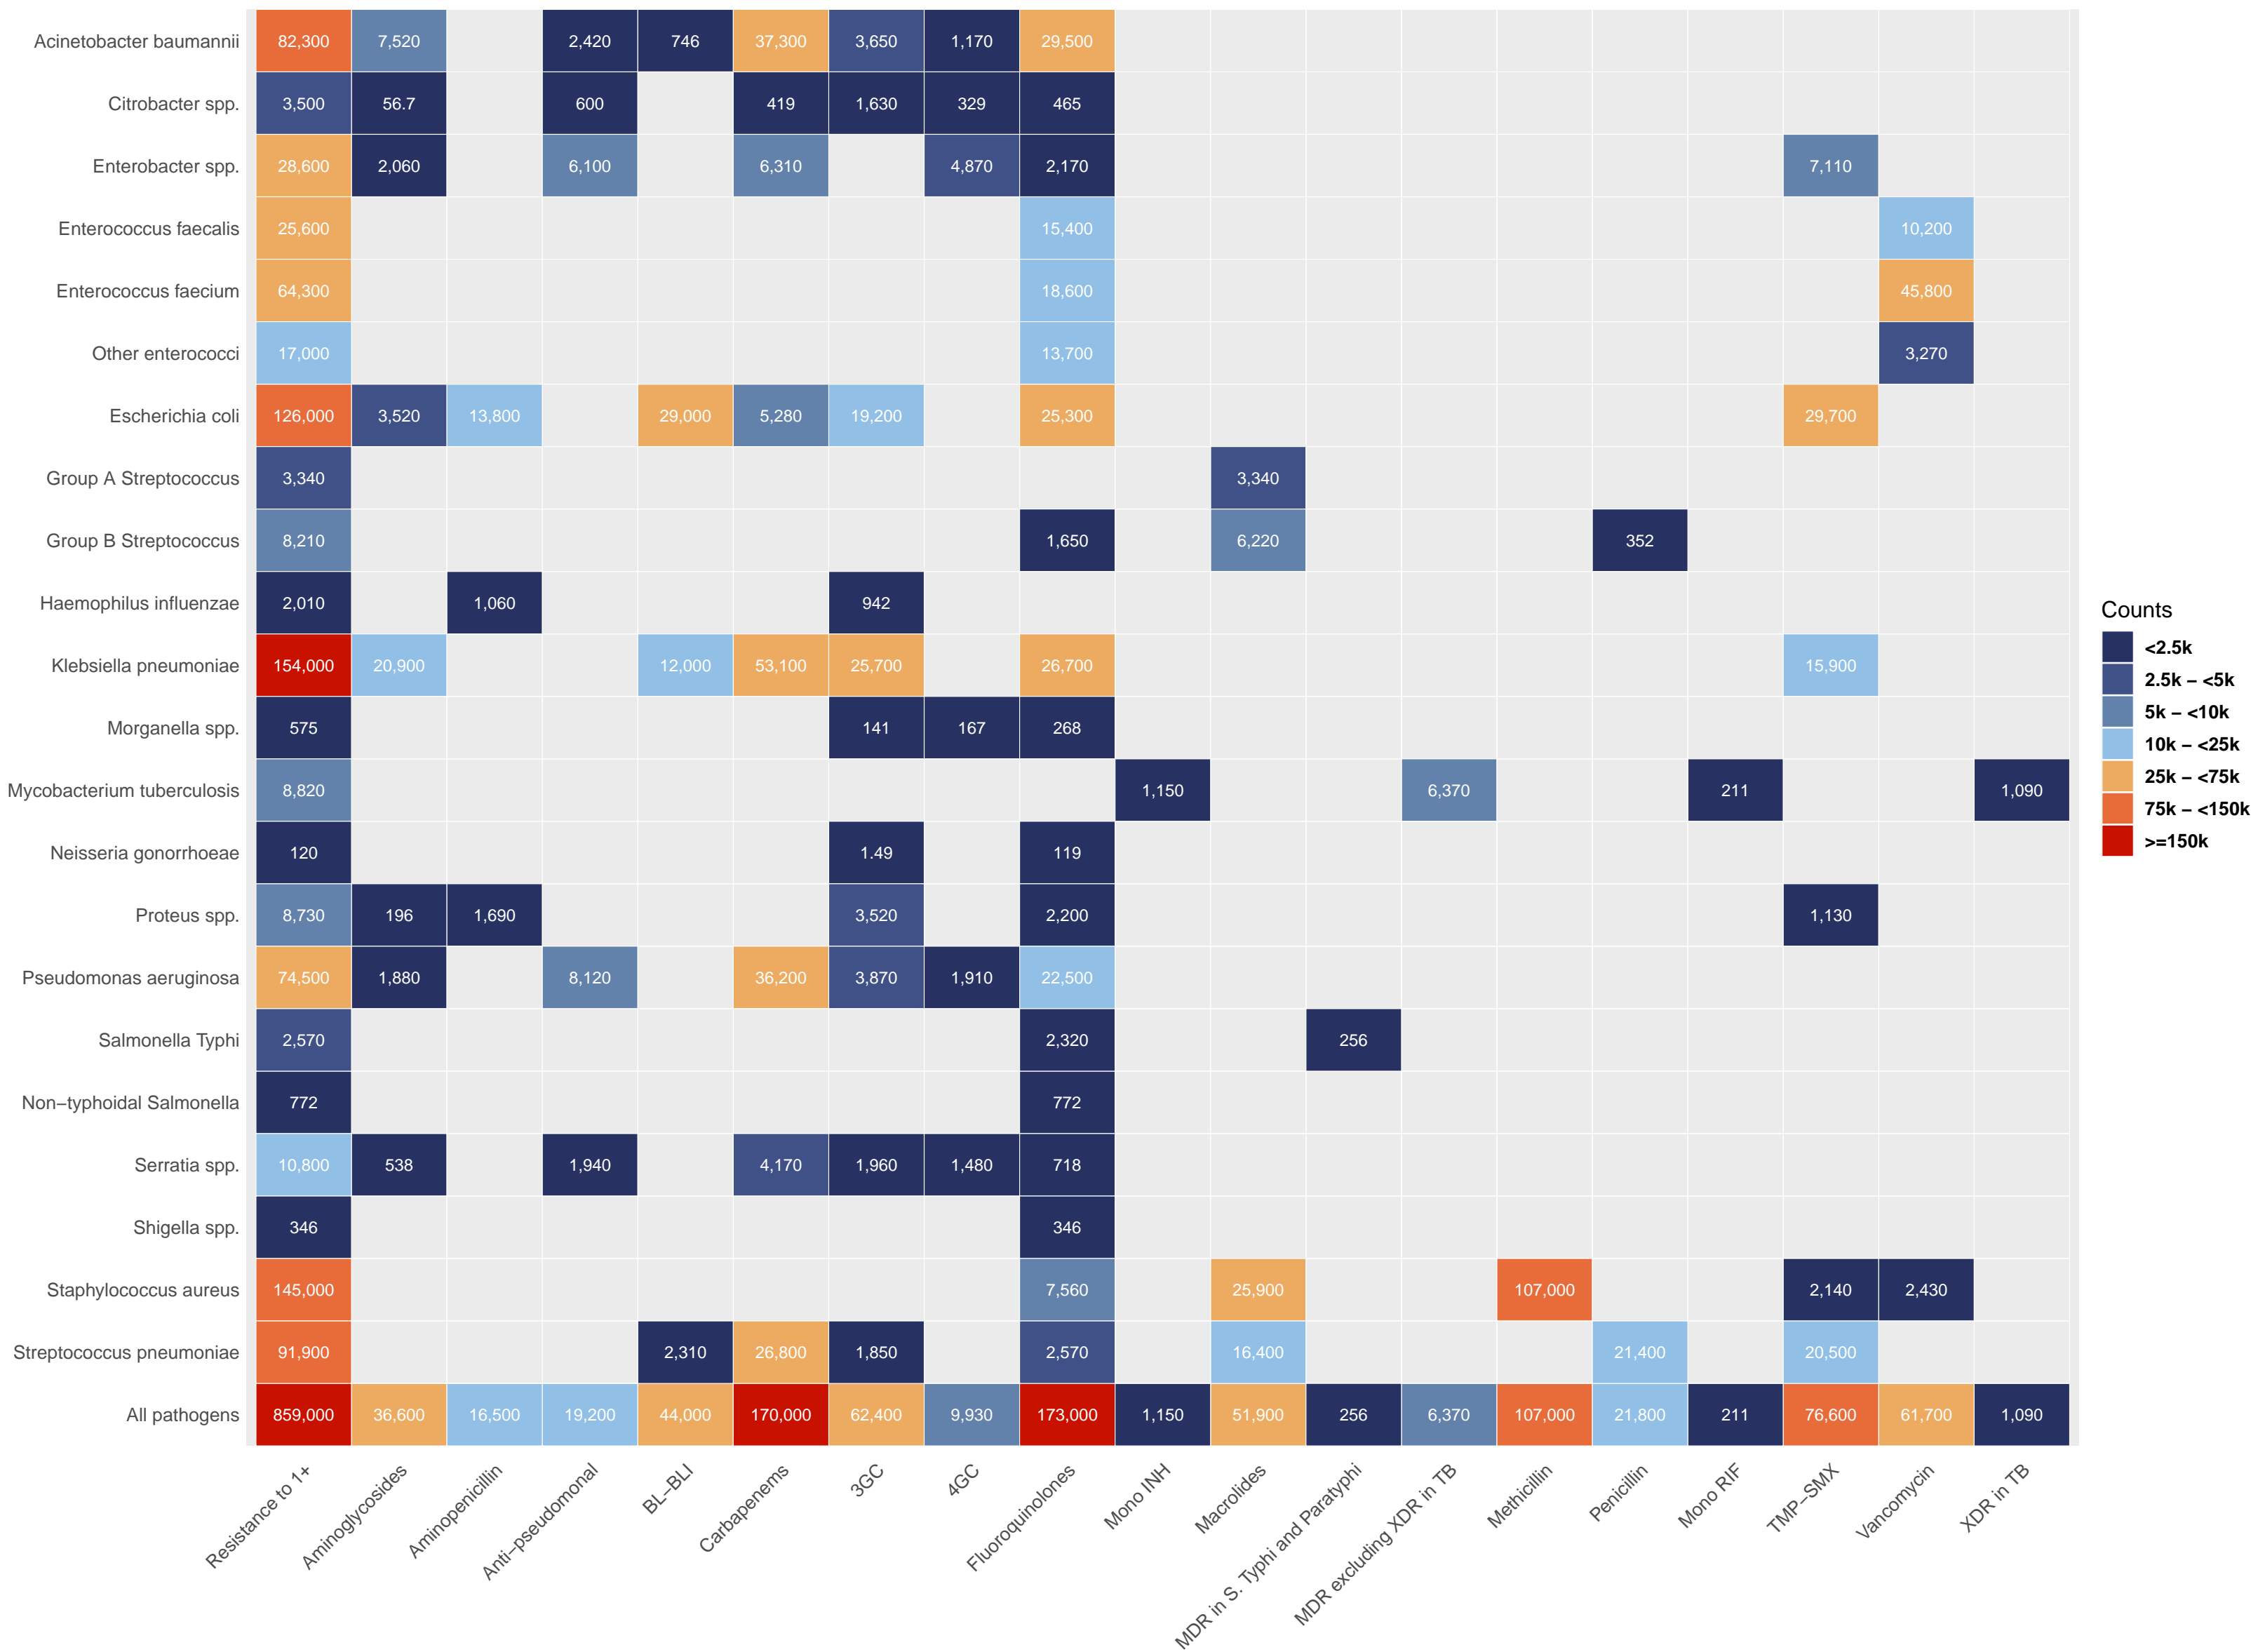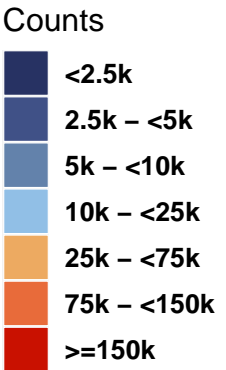

# Canada

DALYs (count) associated with bacterial antimicrobial resistance by pathogen–drug combinations, 2019

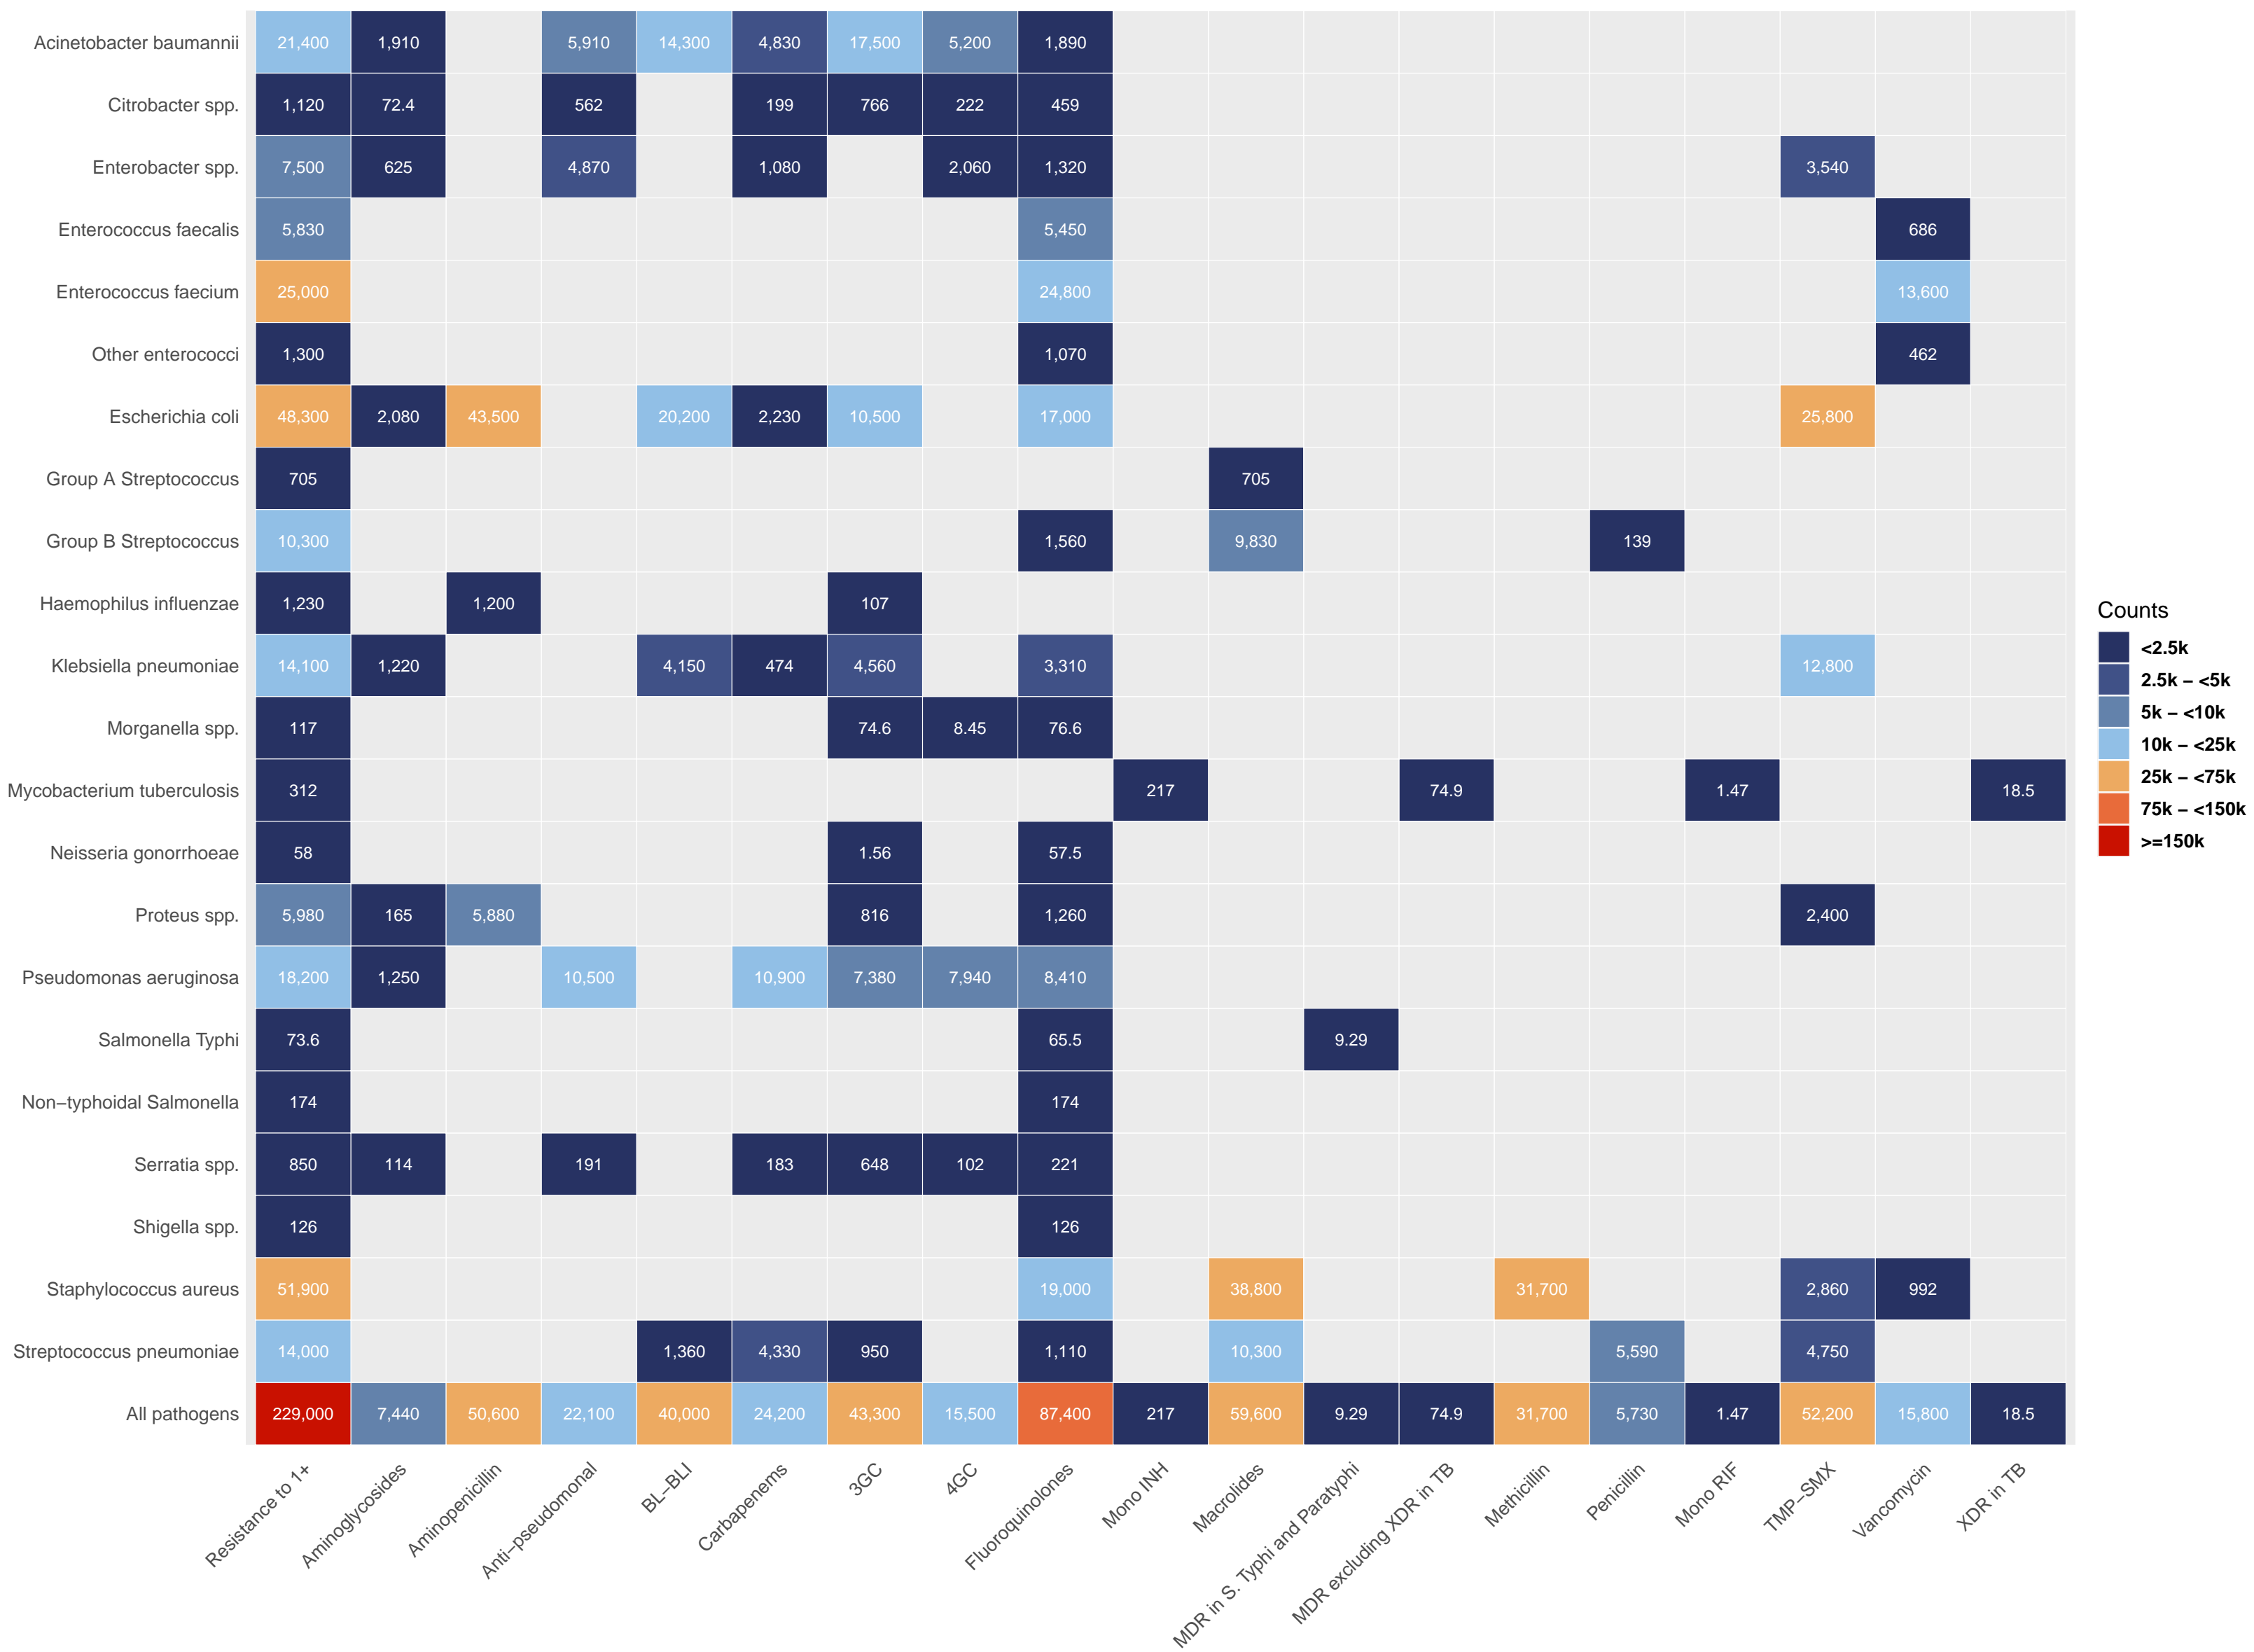

# Canada

DALYs (count) *attributable to bacterial antimicrobial resistance by pathogen–drug combinations, 2019*

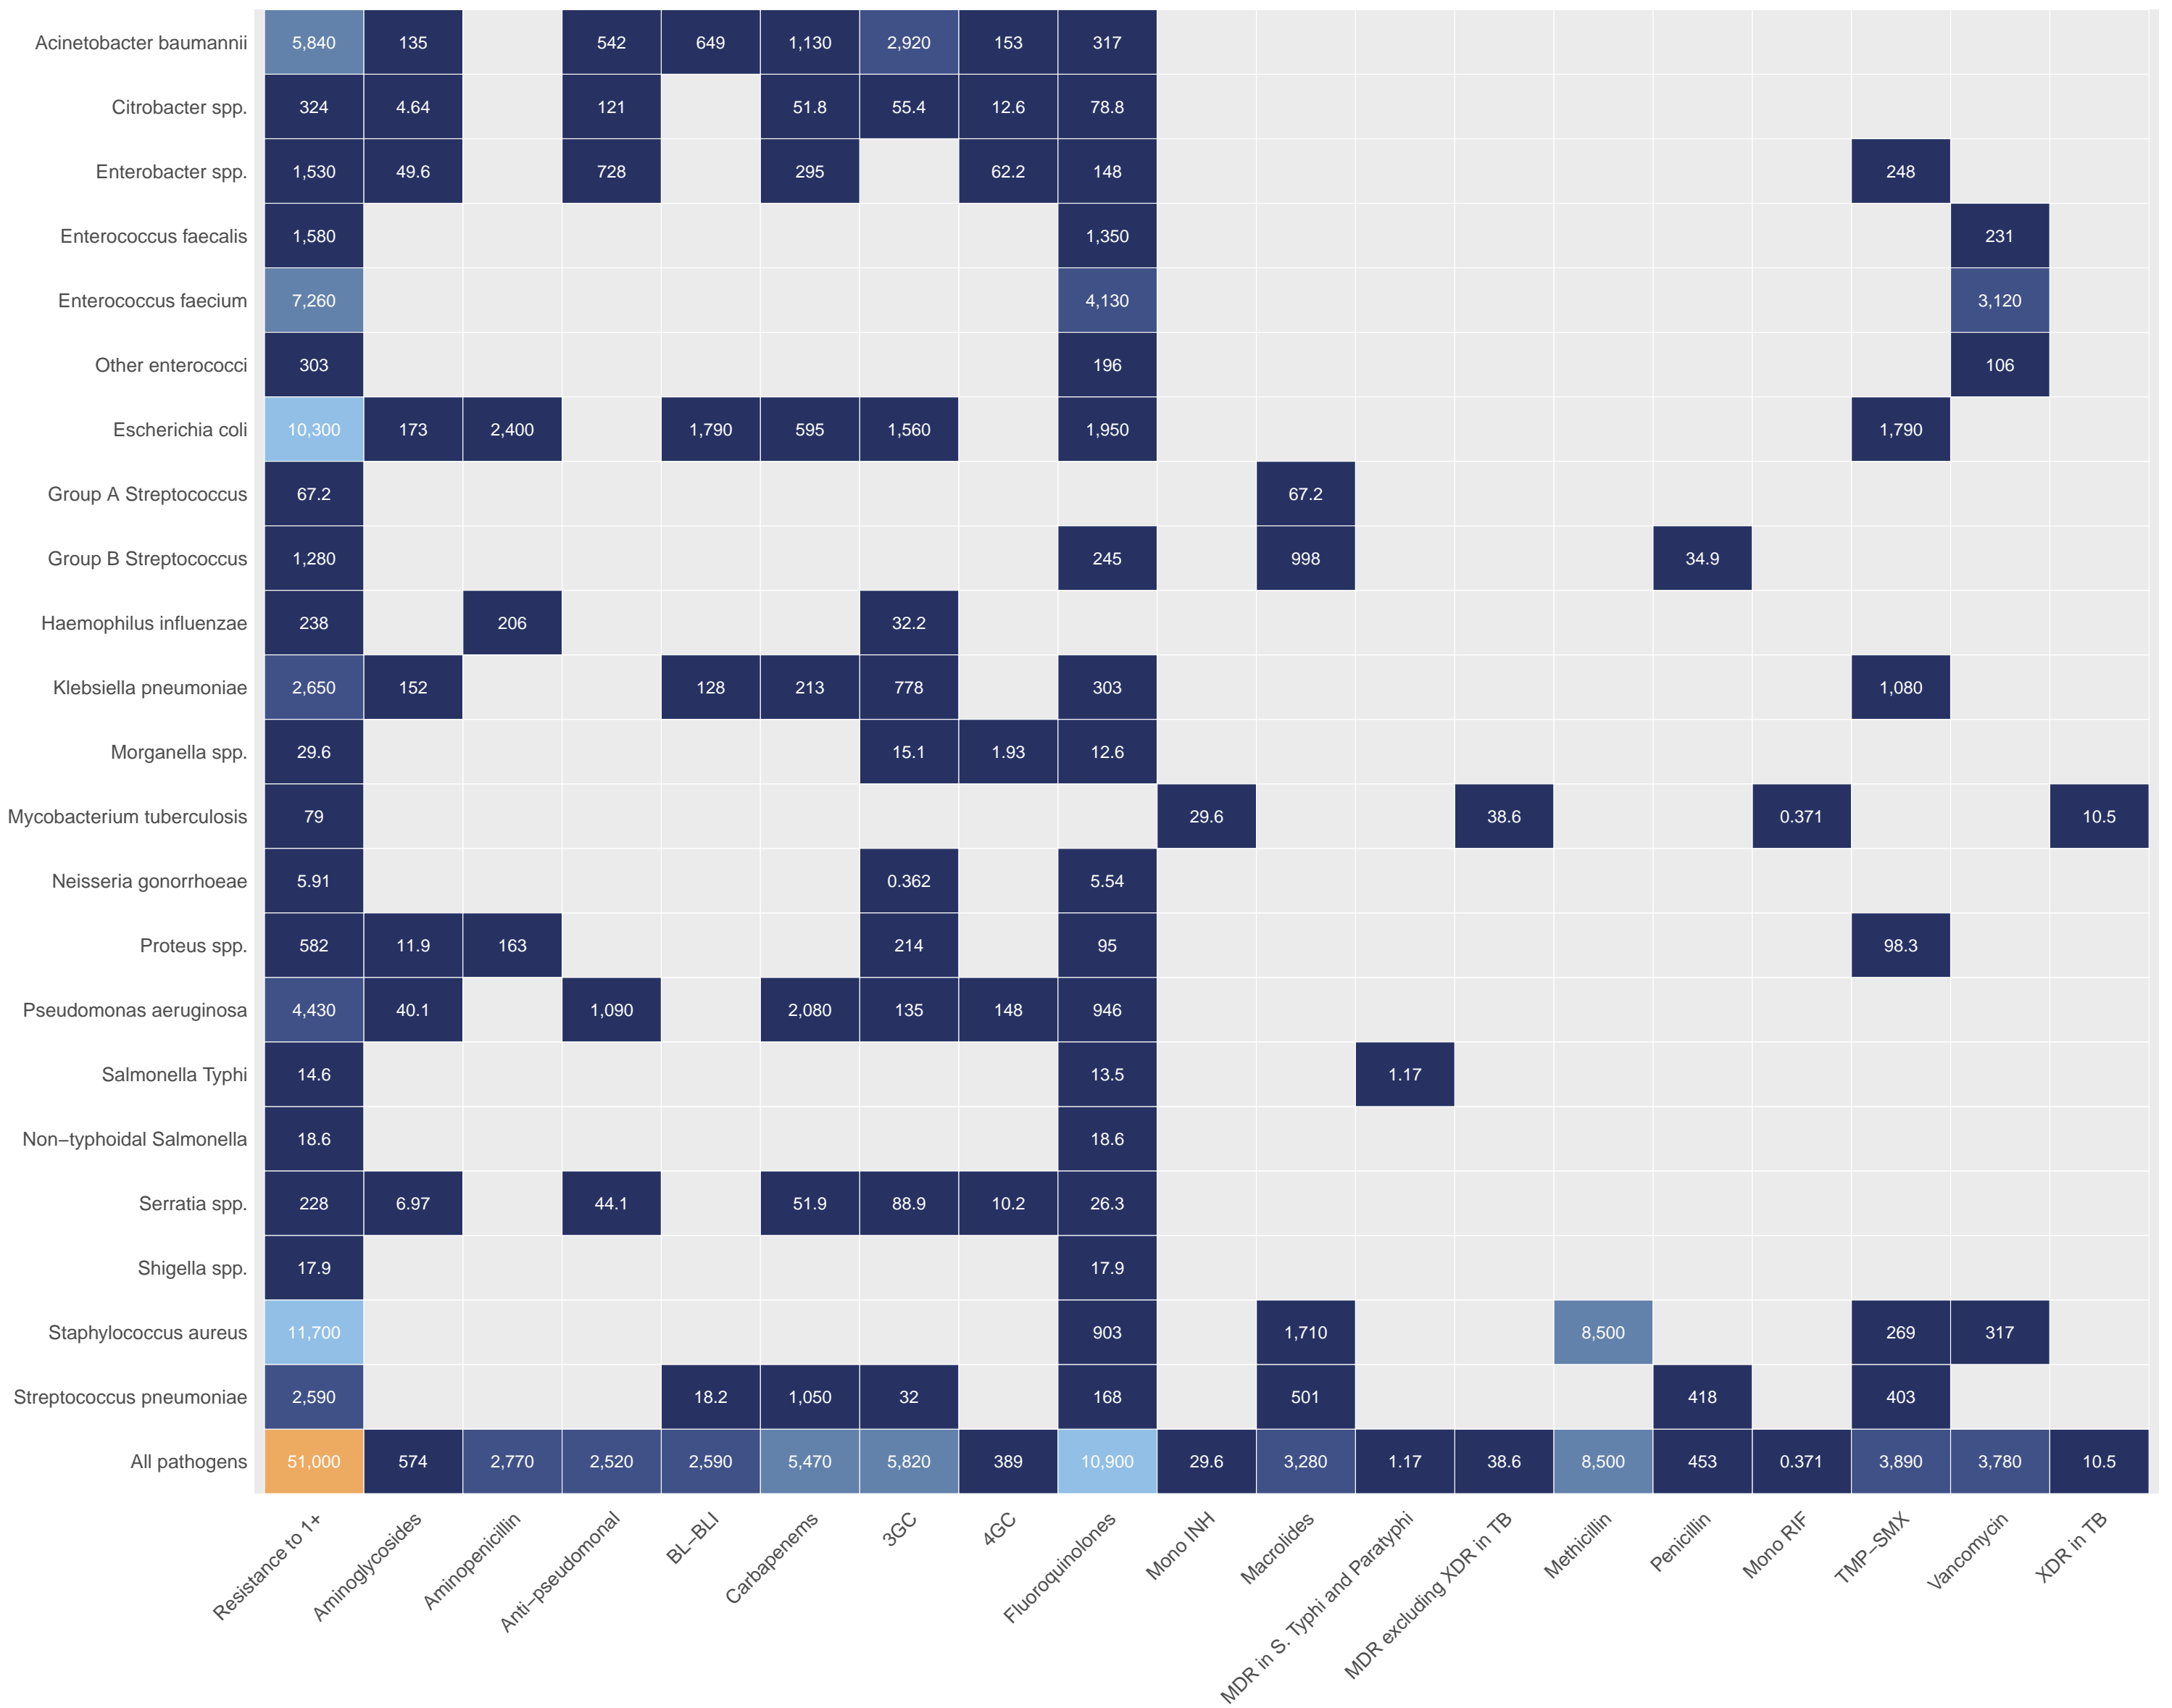

Counts

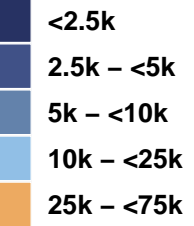

# Chile

DALYs (count) associated with bacterial antimicrobial resistance by pathogen–drug combinations, 2019

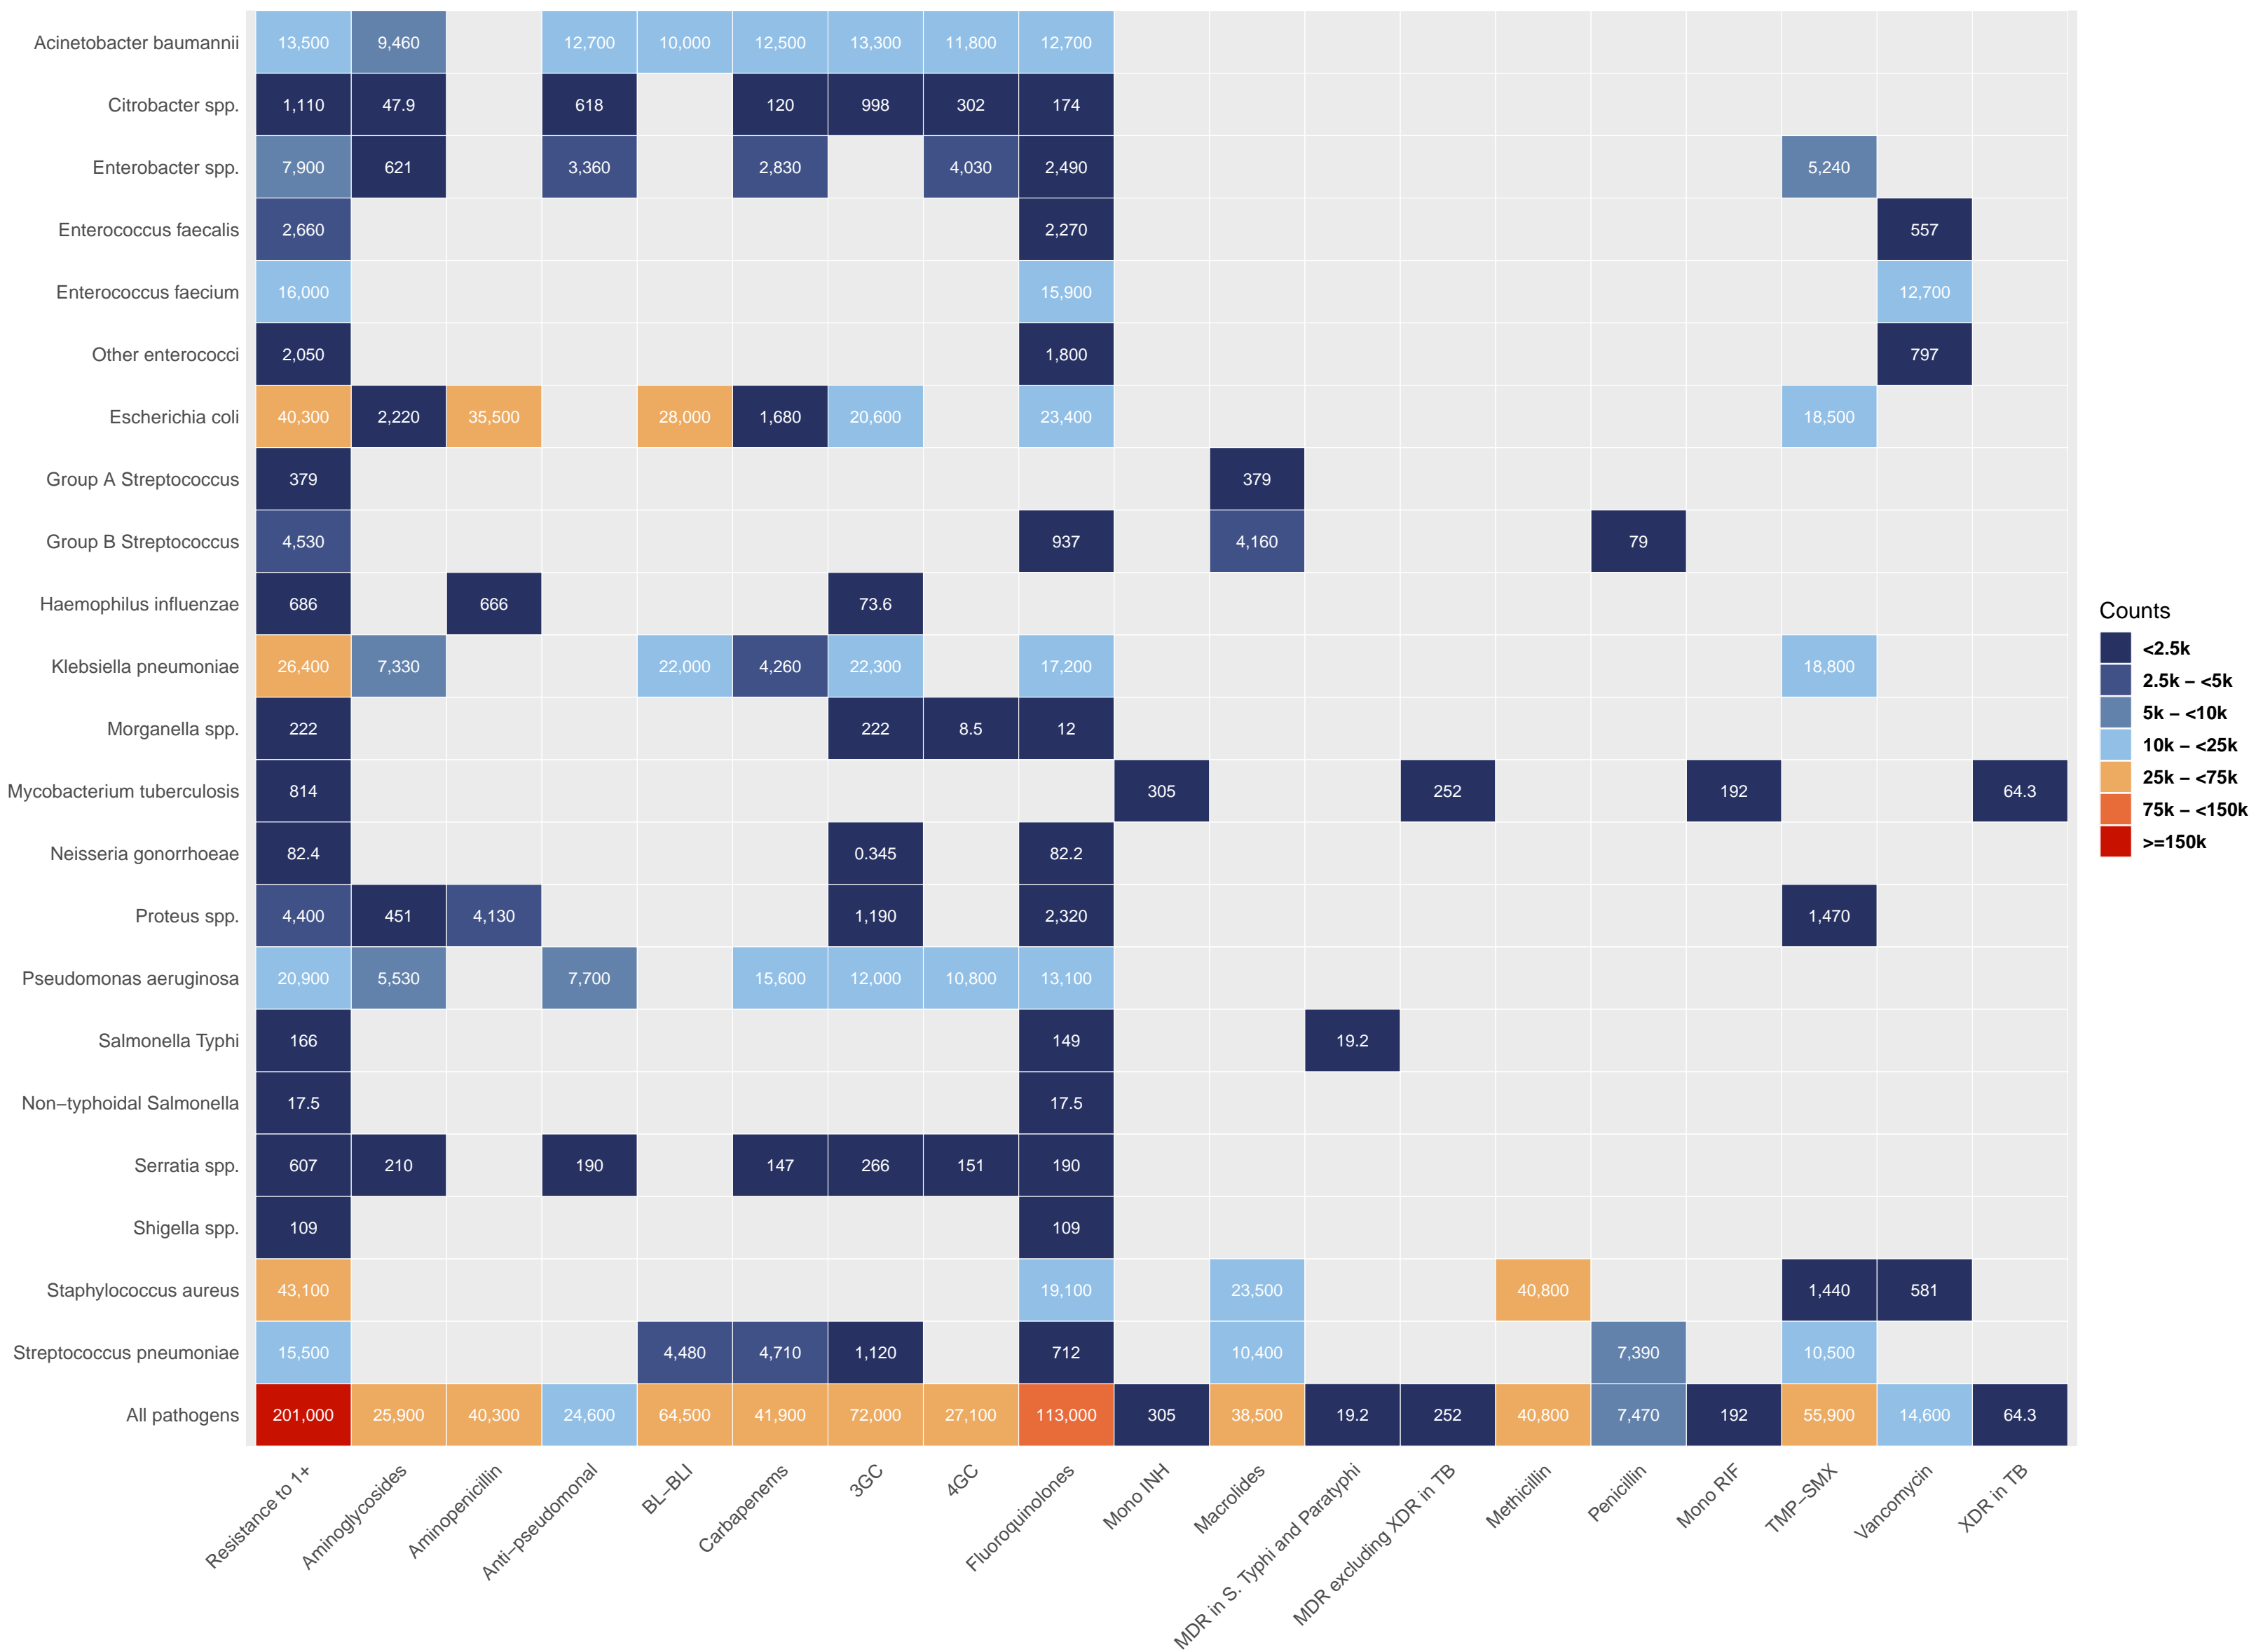

# Chile

DALYs (count) *attributable to bacterial antimicrobial resistance by pathogen–drug combinations, 2019*

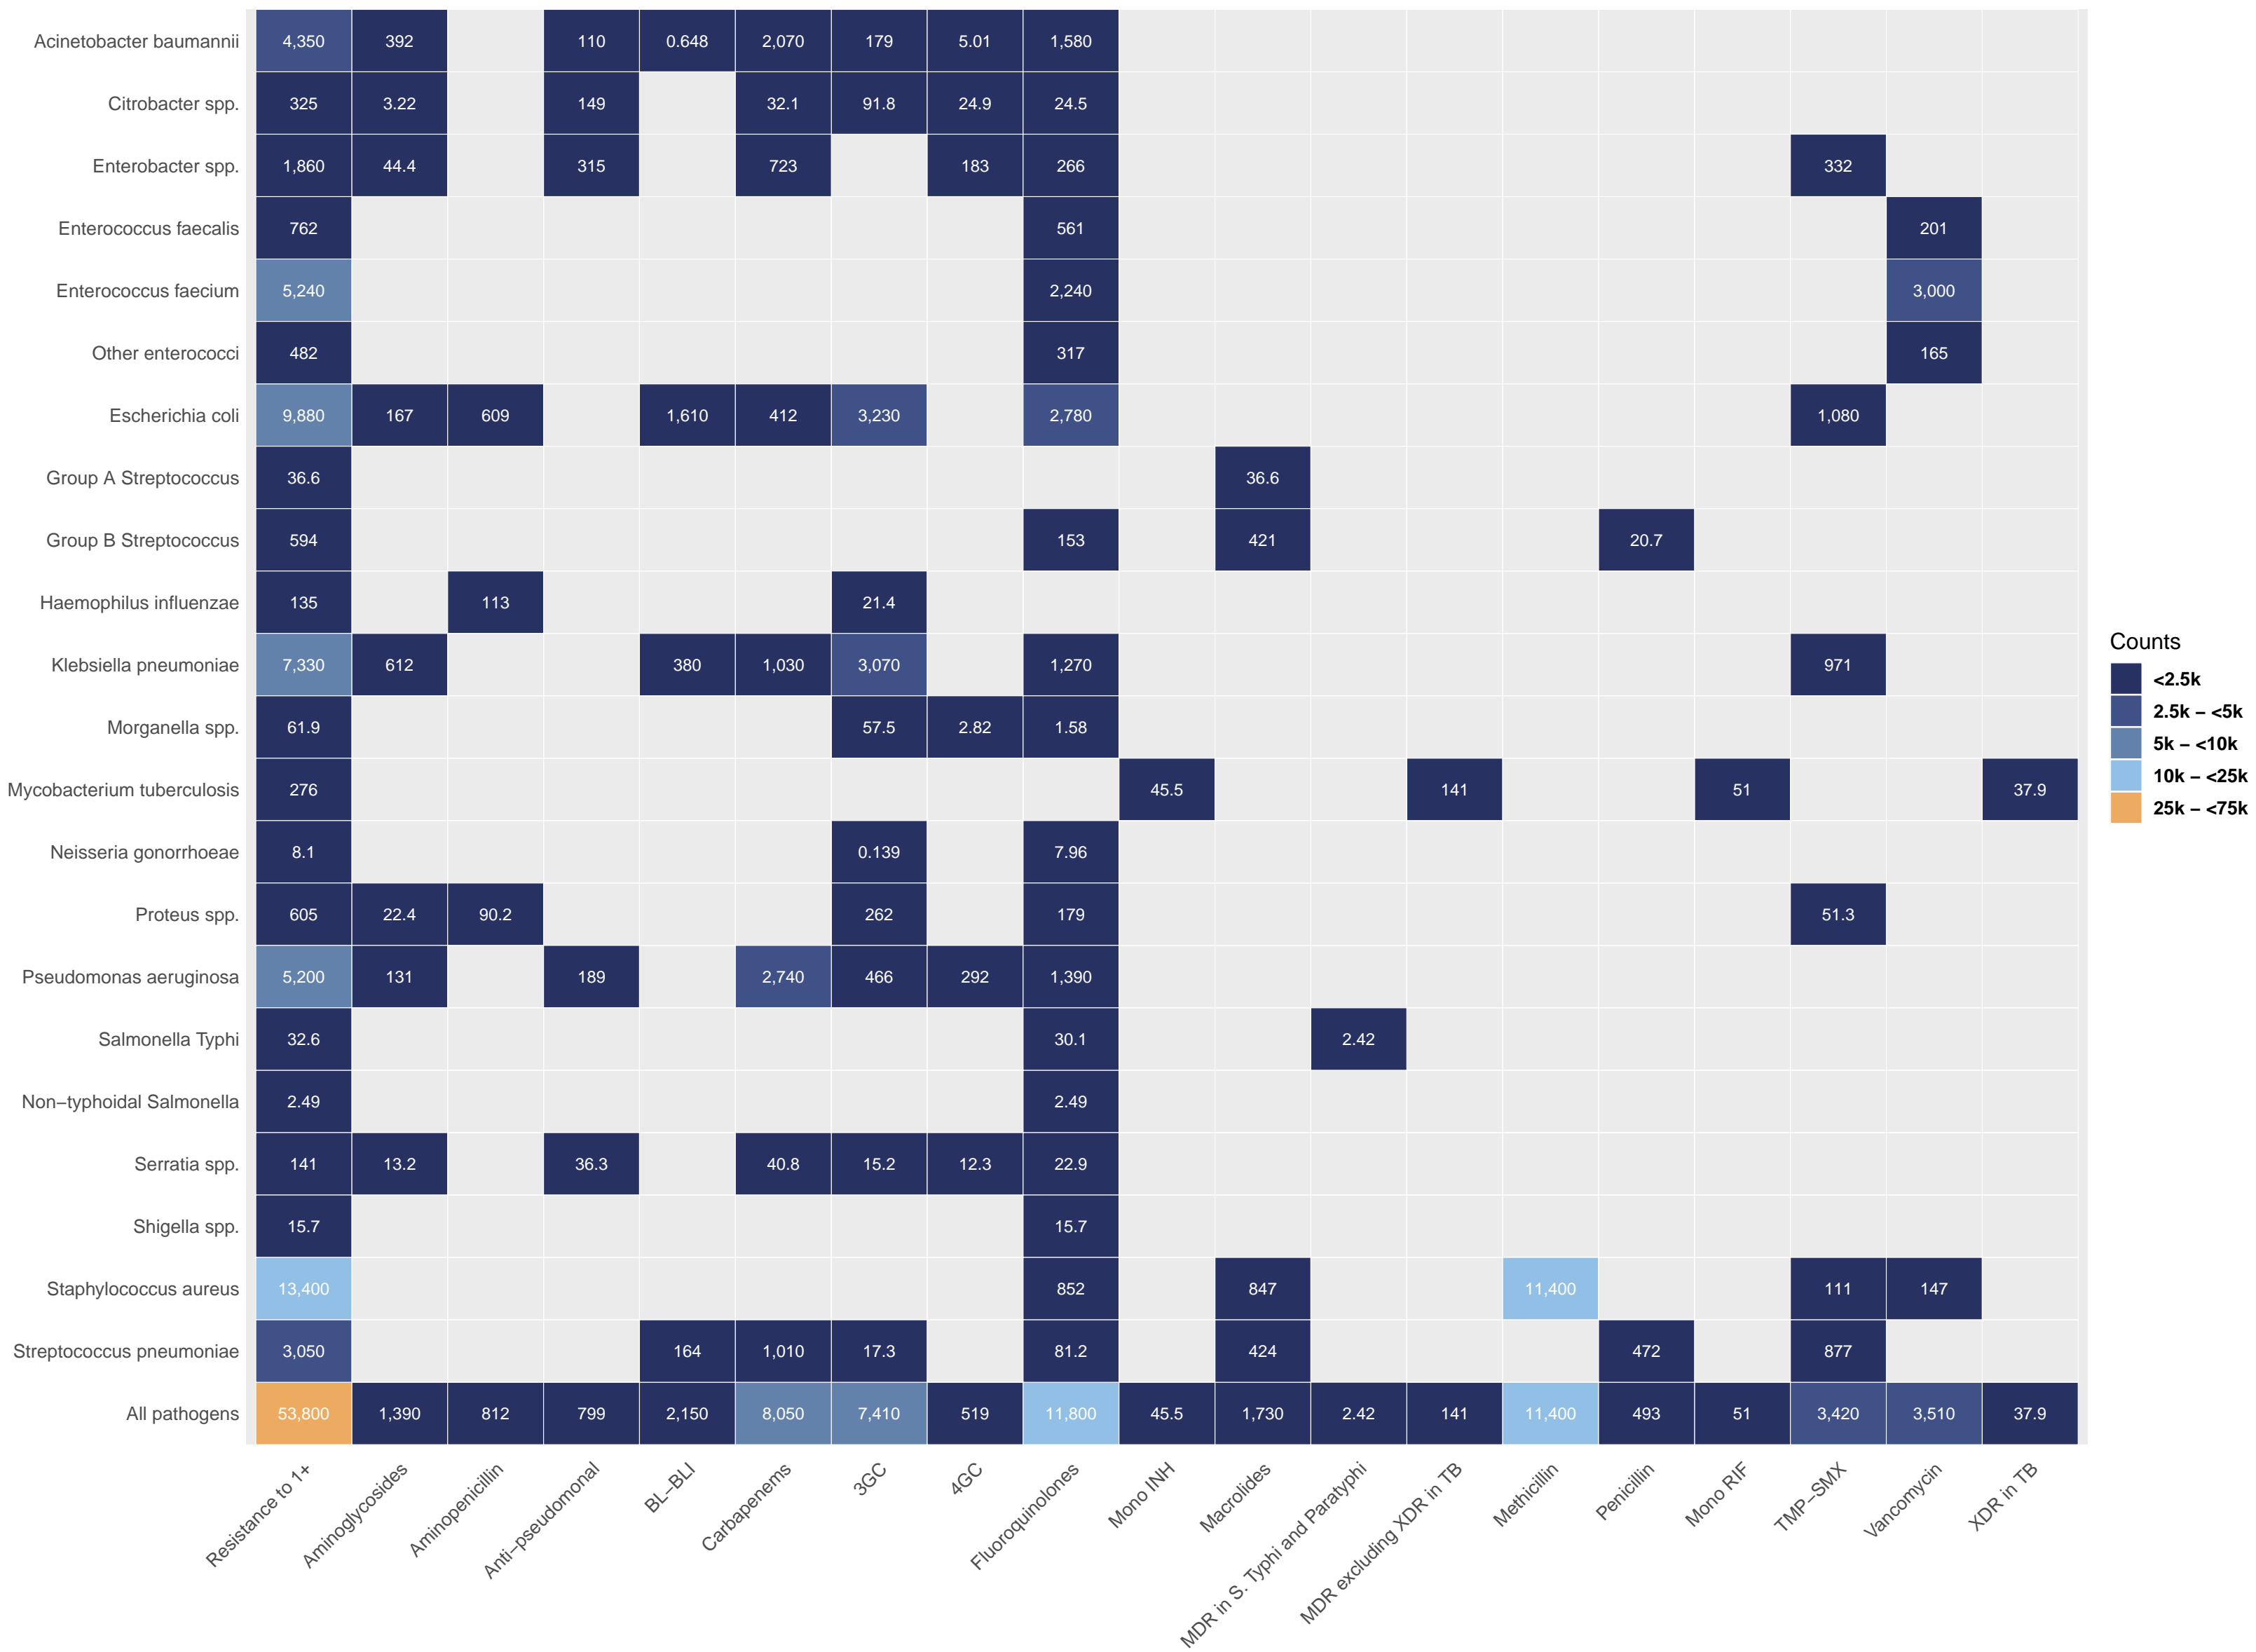

## Counts





# Colombia

DALYs (count) associated with bacterial antimicrobial resistance by pathogen–drug combinations, 2019

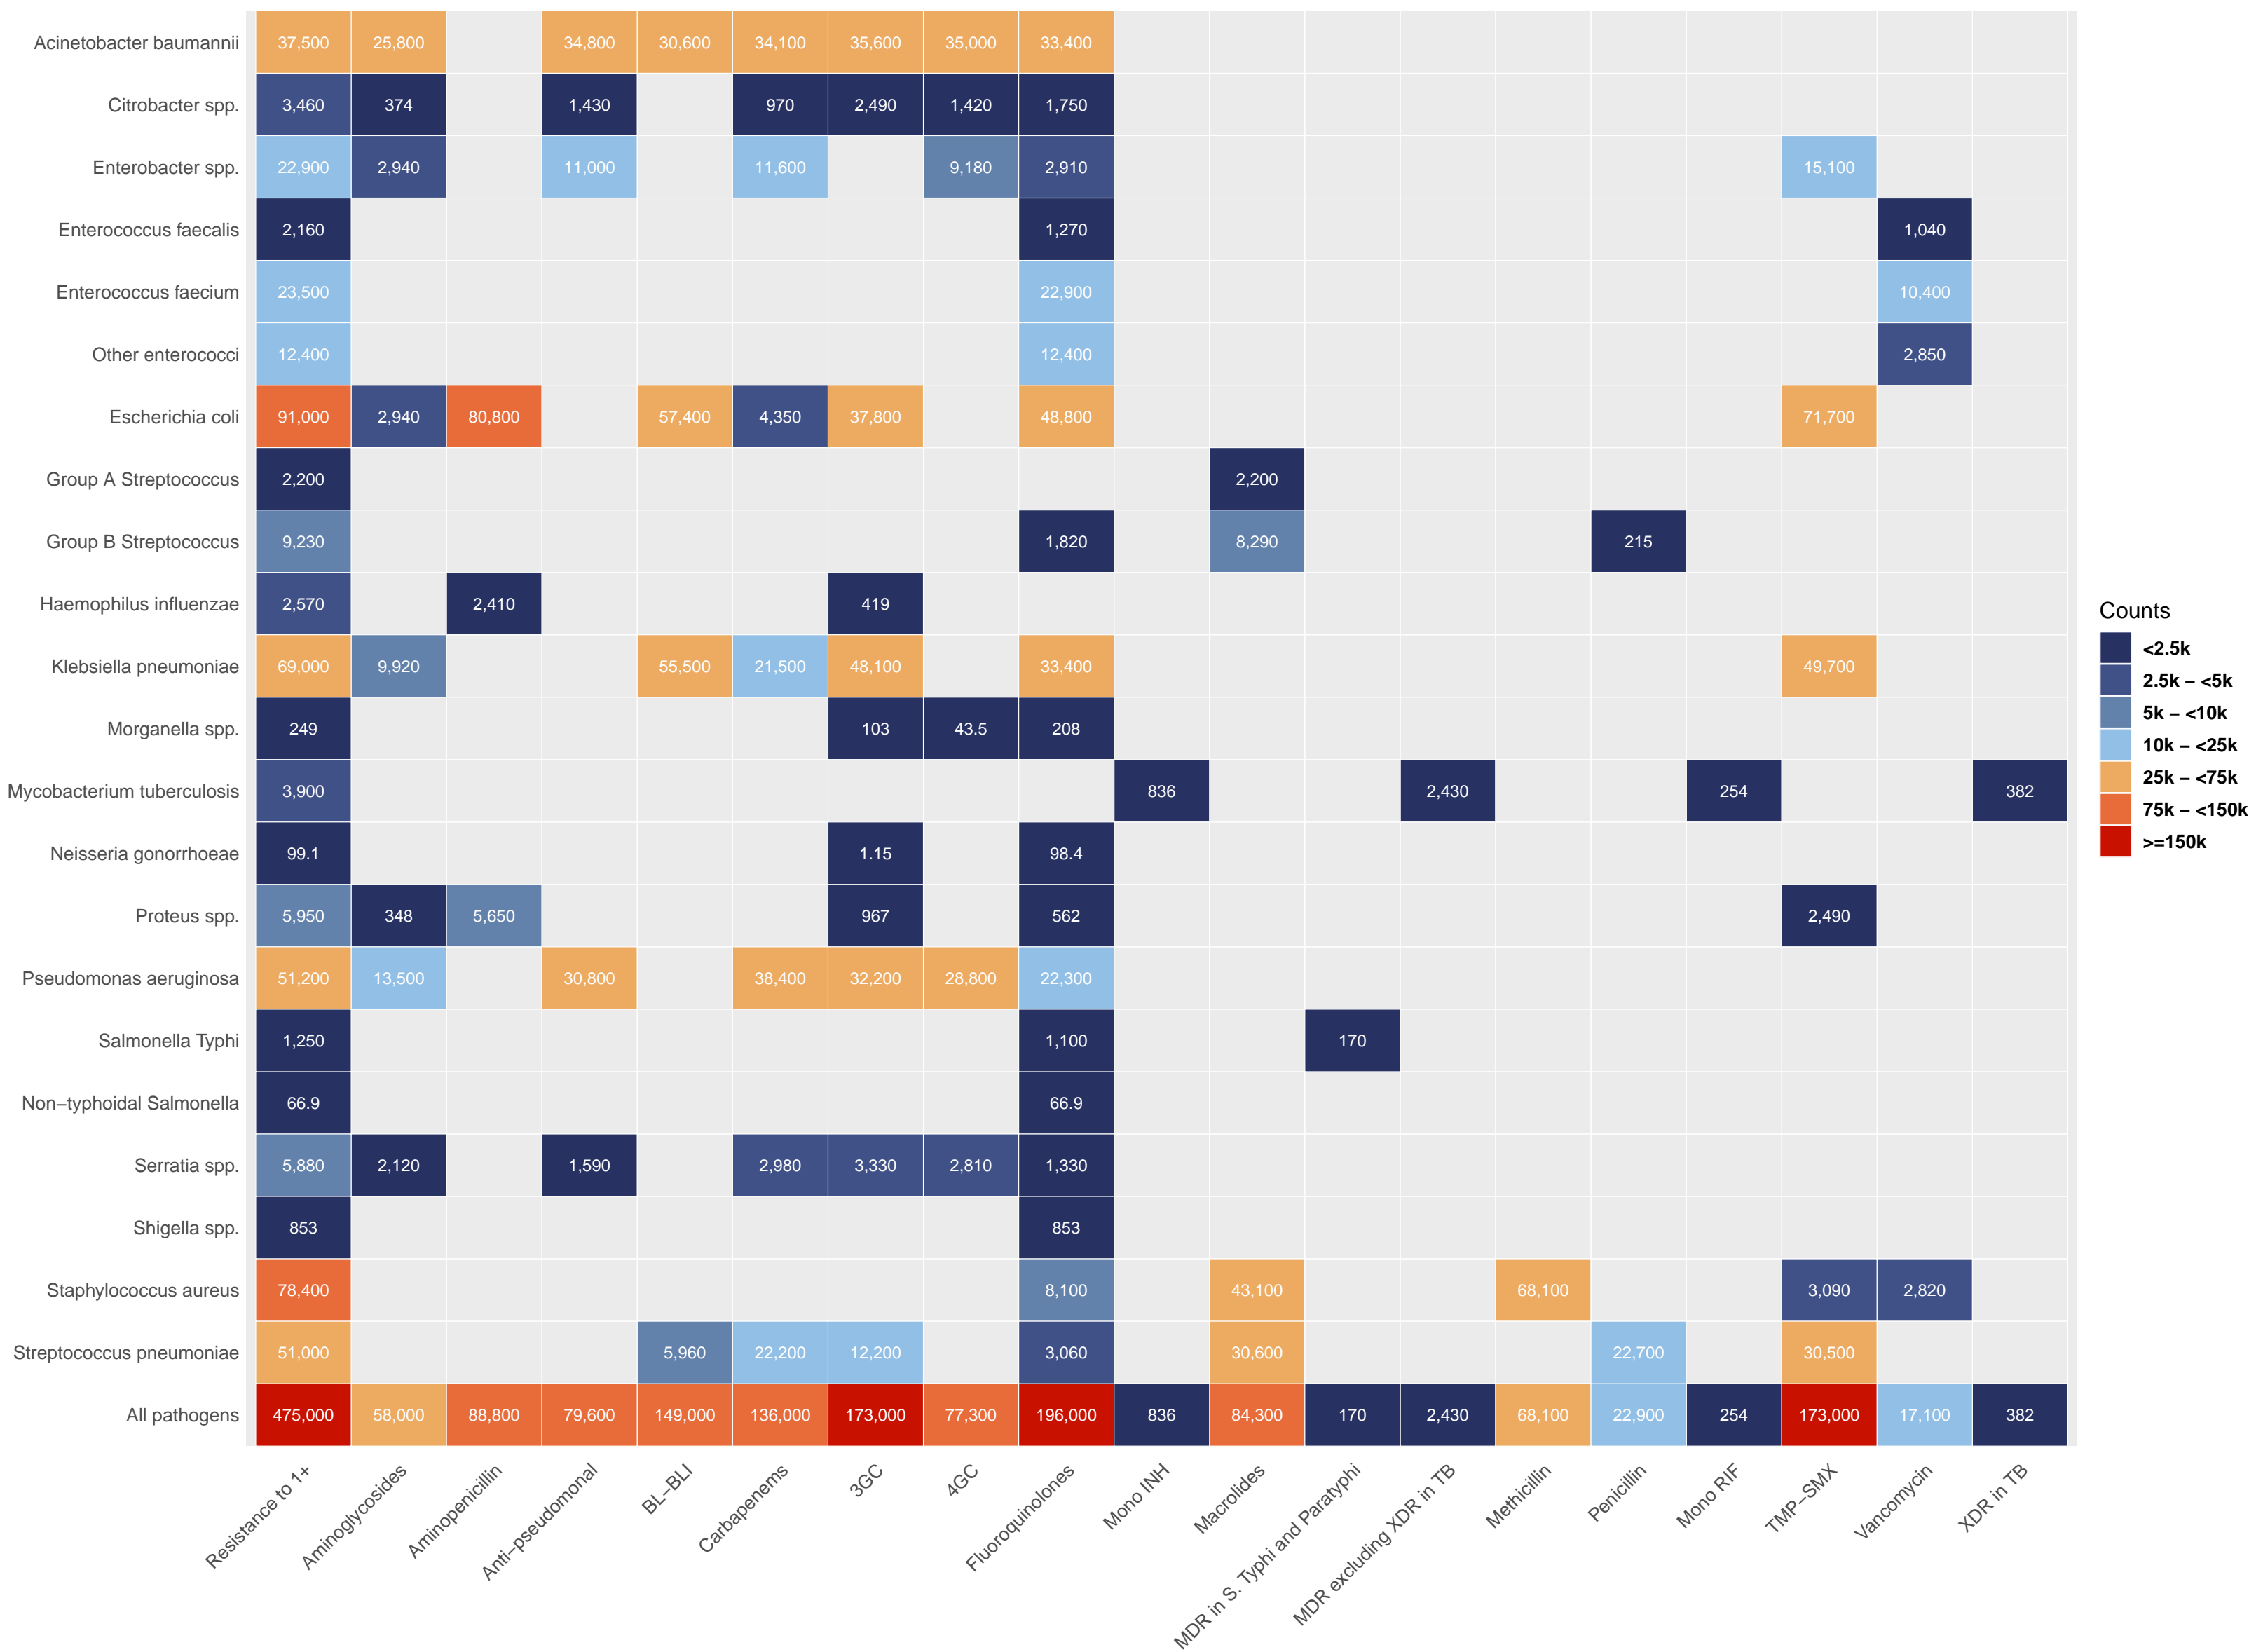

# Colombia

DALYs (count) *attributable to bacterial antimicrobial resistance by pathogen–drug combinations, 2019*

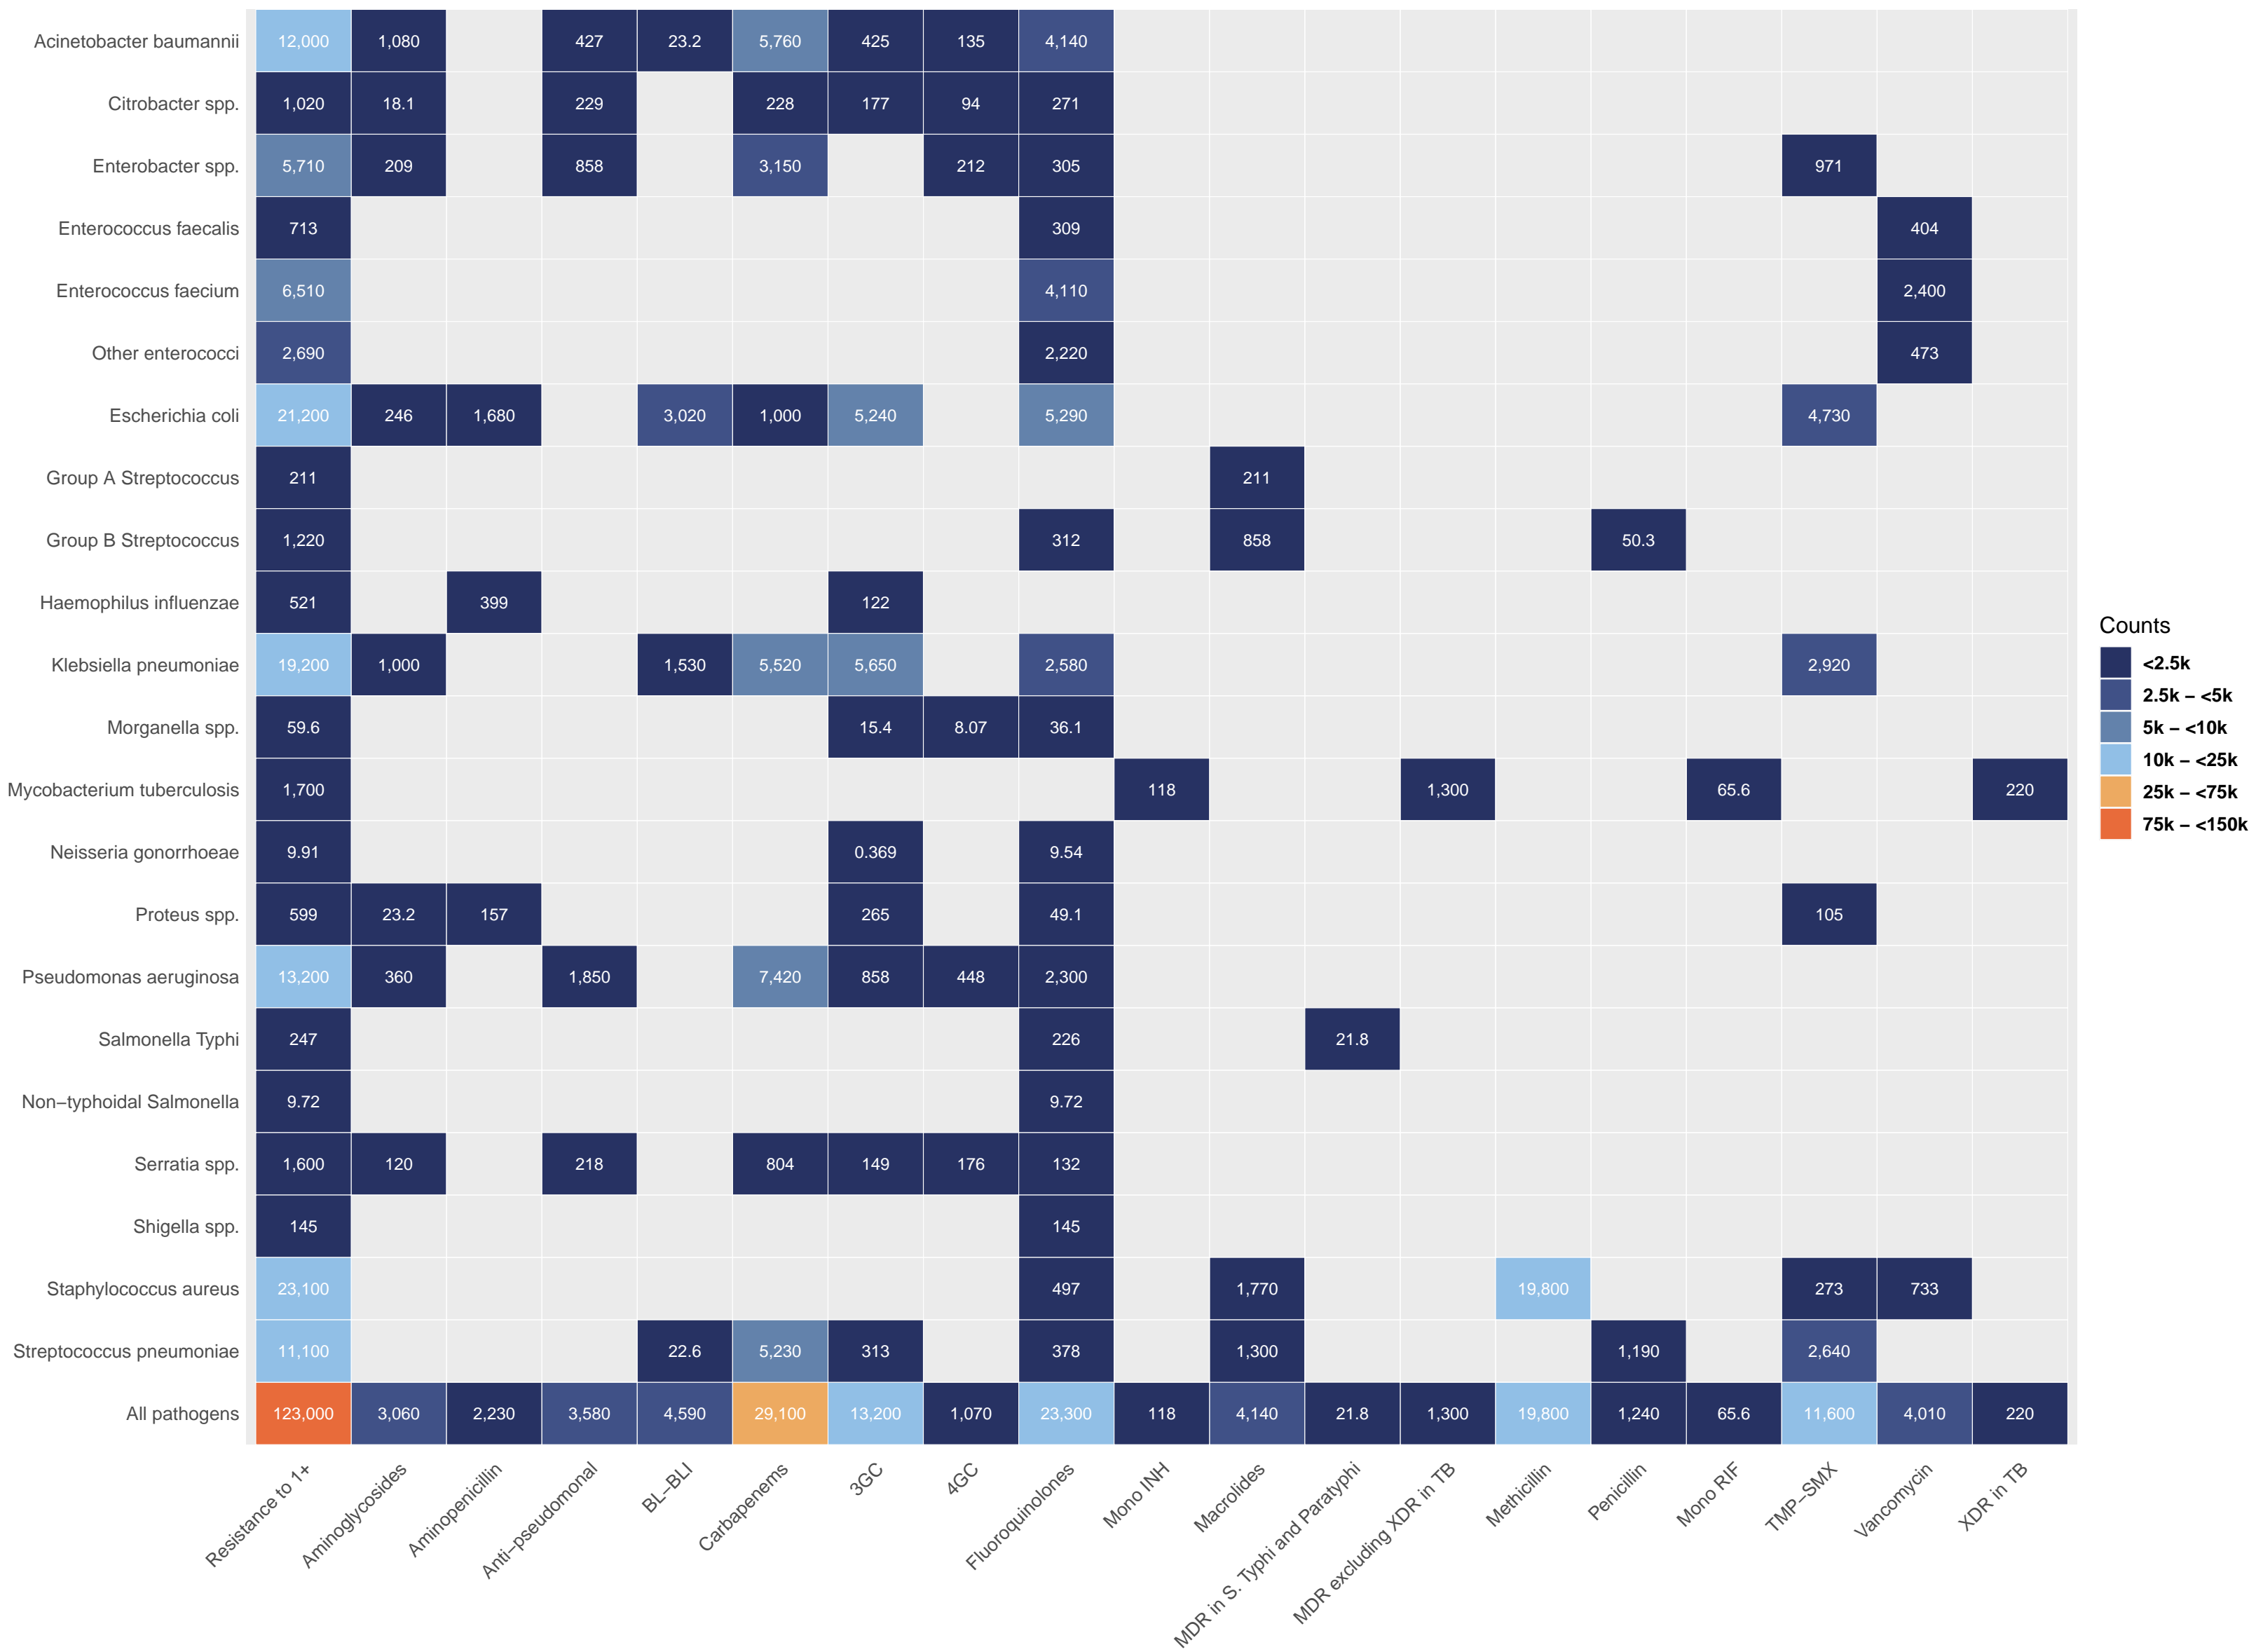

# Costa Rica

DALYs (count) associated with bacterial antimicrobial resistance by pathogen–drug combinations, 2019

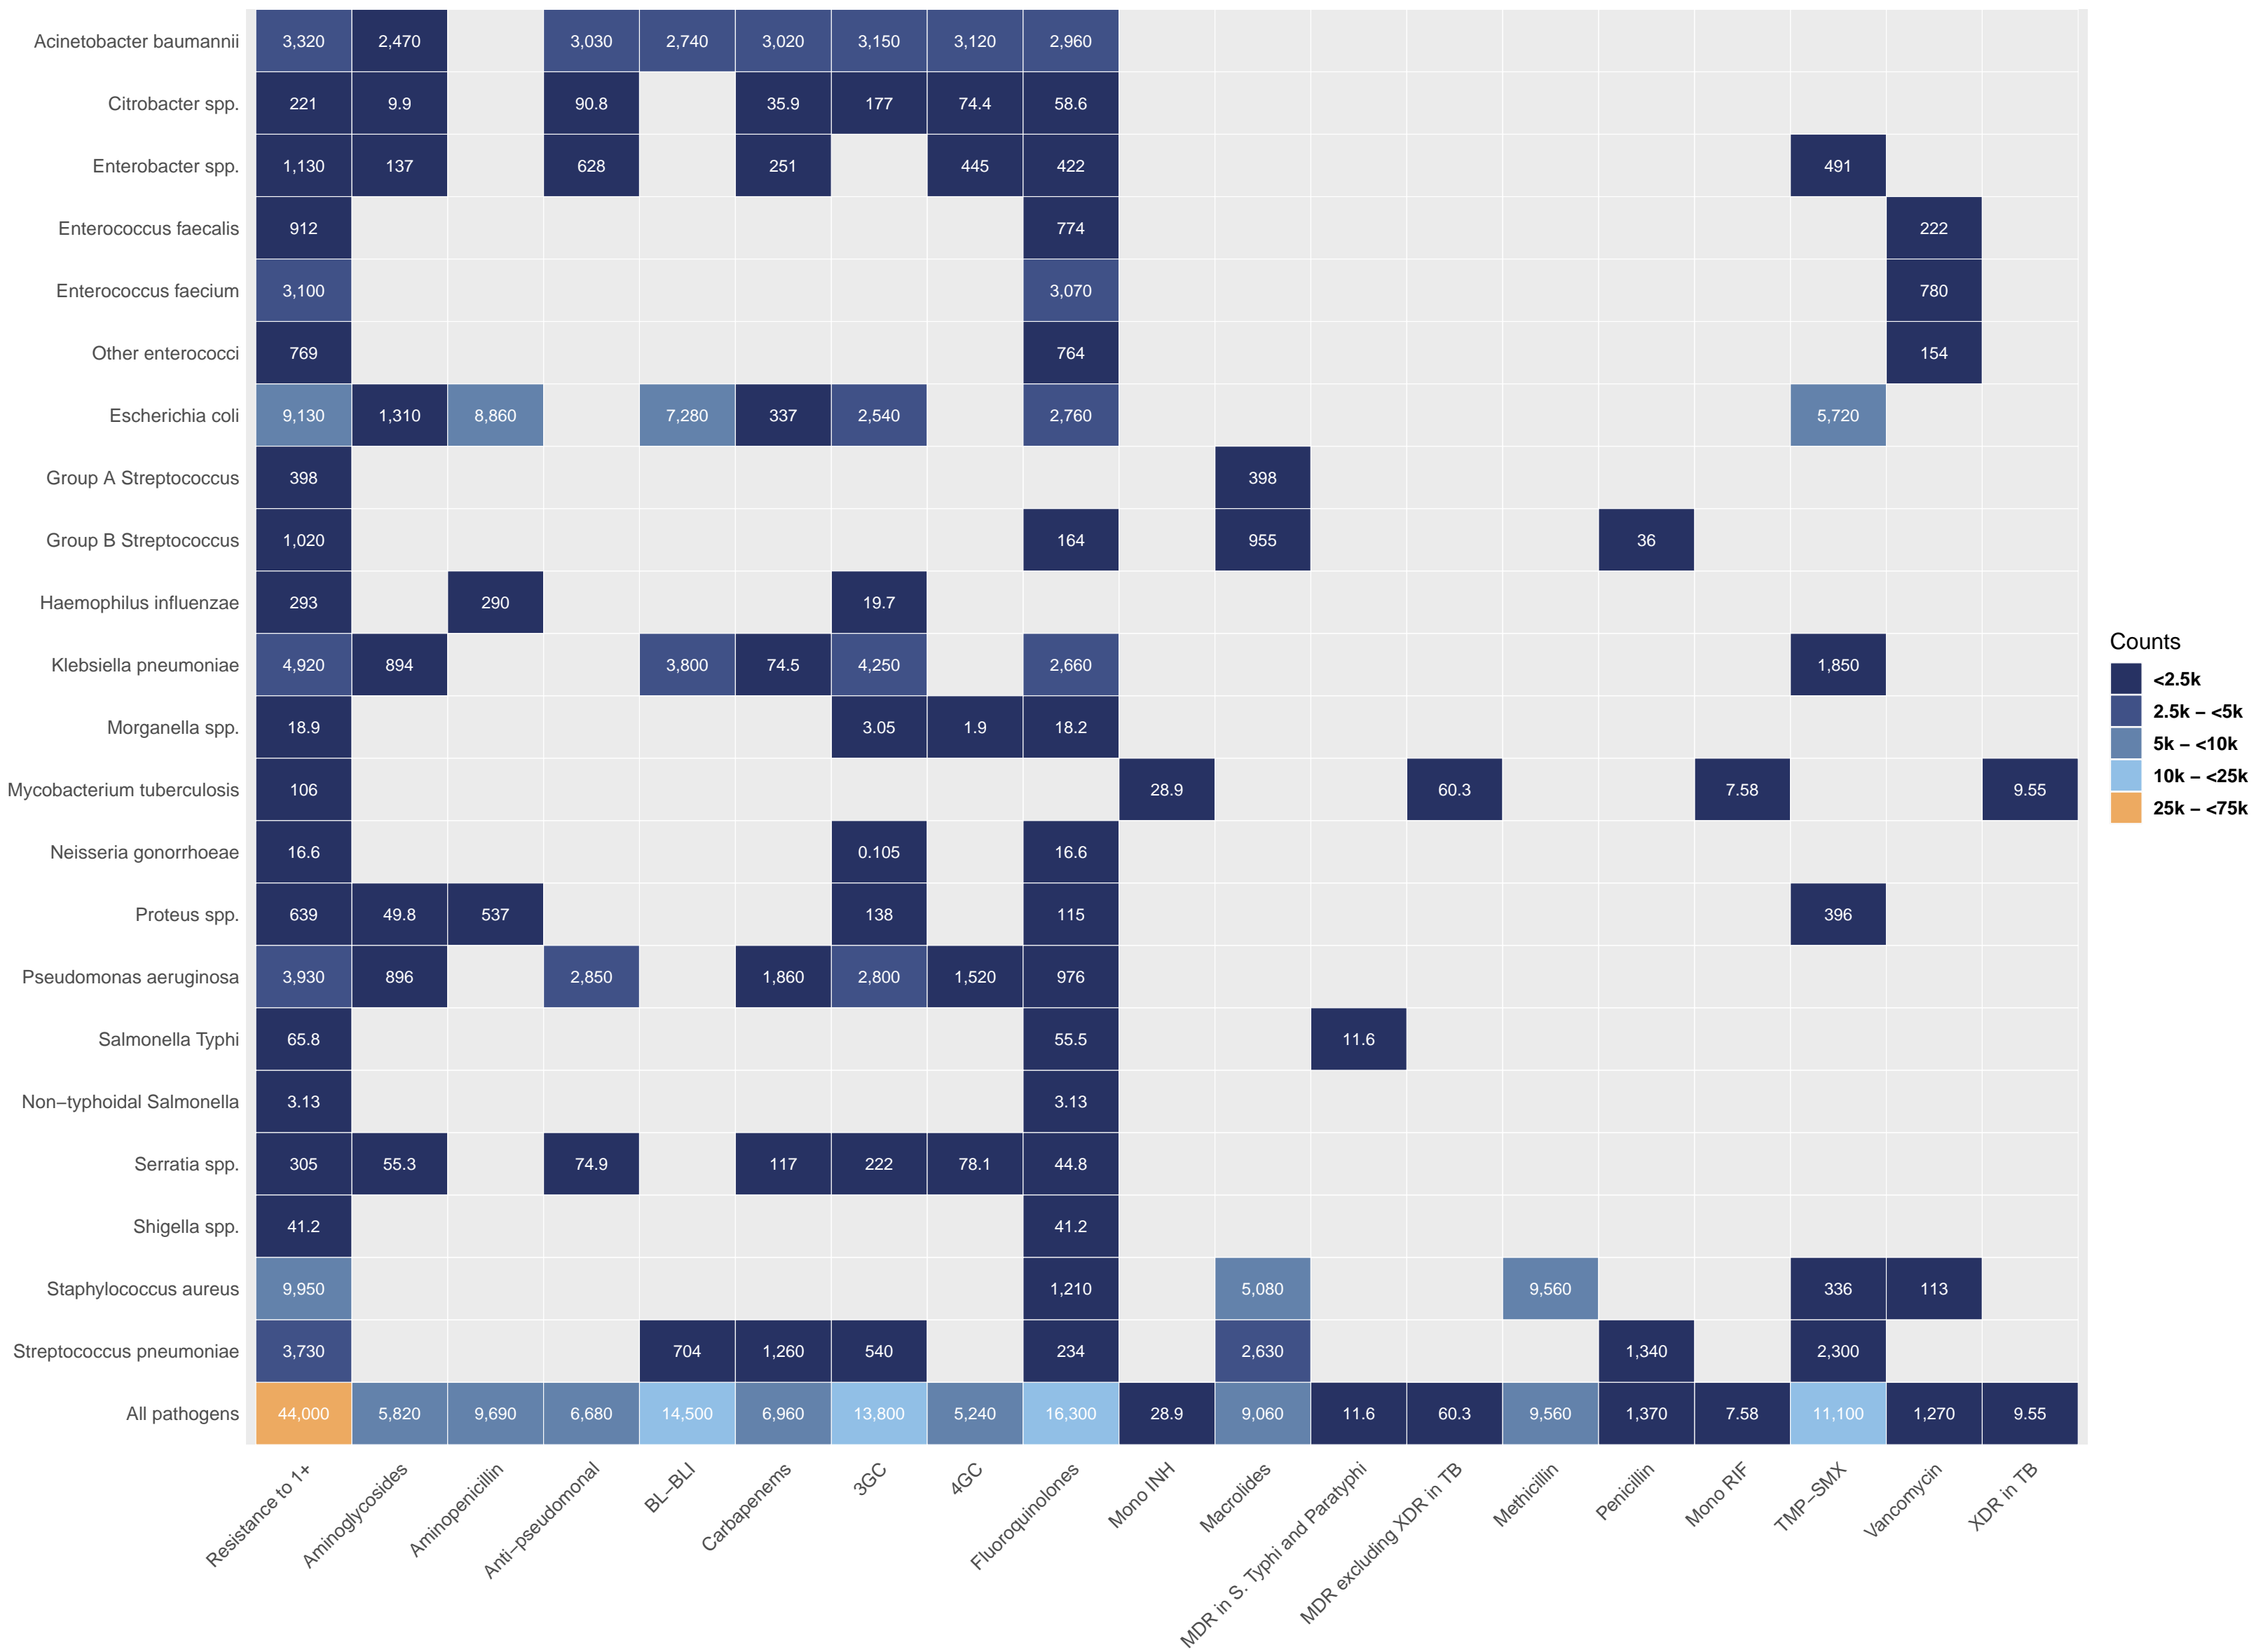

Counts

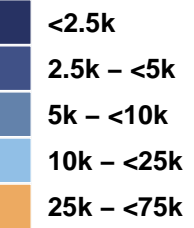

# Costa Rica

DALYs (count) *attributable to bacterial antimicrobial resistance by pathogen–drug combinations, 2019*

|                            |                  |                 |                 |                  |        |             |       |       |                  |          |            |                               |                         |             |            |          |         |            |           |
|----------------------------|------------------|-----------------|-----------------|------------------|--------|-------------|-------|-------|------------------|----------|------------|-------------------------------|-------------------------|-------------|------------|----------|---------|------------|-----------|
| Acinetobacter baumannii    | 1,060            | 103             |                 | 33.1             | 2.2    | 506         | 36.4  | 16.2  | 364              |          |            |                               |                         |             |            |          |         |            |           |
| Citrobacter spp.           | 64.4             | 0.63            |                 | 20               |        | 9.47        | 18.1  | 6.96  | 9.16             |          |            |                               |                         |             |            |          |         |            |           |
| Enterobacter spp.          | 257              | 8.91            |                 | 80.3             |        | 65.2        |       | 19.5  | 52.5             |          |            |                               |                         |             |            |          | 30.8    |            |           |
| Enterococcus faecalis      | 265              |                 |                 |                  |        |             |       |       | 188              |          |            |                               |                         |             |            |          |         | 76.8       |           |
| Enterococcus faecium       | 782              |                 |                 |                  |        |             |       |       | 596              |          |            |                               |                         |             |            |          |         | 185        |           |
| Other enterococci          | 166              |                 |                 |                  |        |             |       |       | 140              |          |            |                               |                         |             |            |          |         | 26.8       |           |
| Escherichia coli           | 1,970            | 88.7            | 179             |                  | 573    | 84          | 377   |       | 287              |          |            |                               |                         |             |            |          | 377     |            |           |
| Group A Streptococcus      | 37.9             |                 |                 |                  |        |             |       |       |                  |          | 37.9       |                               |                         |             |            |          |         |            |           |
| Group B Streptococcus      | 132              |                 |                 |                  |        |             |       |       | 26.8             |          | 97.9       |                               |                         | 7.07        |            |          |         |            |           |
| Haemophilus influenzae     | 55.8             |                 | 49.8            |                  |        |             | 6.01  |       |                  |          |            |                               |                         |             |            |          |         |            |           |
| Klebsiella pneumoniae      | 1,310            | 85.2            |                 |                  | 90.7   | 39.1        | 788   |       | 216              |          |            |                               |                         |             |            |          | 94.7    |            |           |
| Morganella spp.            | 4.11             |                 |                 |                  |        |             | 0.382 | 0.298 | 3.43             |          |            |                               |                         |             |            |          |         |            |           |
| Mycobacterium tuberculosis | 43.6             |                 |                 |                  |        |             |       |       |                  | 4.1      |            |                               | 32.1                    |             |            | 1.95     |         |            | 5.45      |
| Neisseria gonorrhoeae      | 1.65             |                 |                 |                  |        |             | 0.035 |       | 1.61             |          |            |                               |                         |             |            |          |         |            |           |
| Proteus spp.               | 75               | 3.03            | 12.6            |                  |        |             | 33    |       | 8.85             |          |            |                               |                         |             |            |          | 17.5    |            |           |
| Pseudomonas aeruginosa     | 1,040            | 26.8            |                 | 377              |        | 378         | 144   | 8.5   | 105              |          |            |                               |                         |             |            |          |         |            |           |
| Salmonella Typhi           | 12.7             |                 |                 |                  |        |             |       |       | 11.2             |          |            | 1.47                          |                         |             |            |          |         |            |           |
| Non-typhoidal Salmonella   | 0.369            |                 |                 |                  |        |             |       |       | 0.369            |          |            |                               |                         |             |            |          |         |            |           |
| Serratia spp.              | 85               | 3.3             |                 | 14.7             |        | 33.2        | 23.5  | 5.53  | 4.82             |          |            |                               |                         |             |            |          |         |            |           |
| Shigella spp.              | 6.61             |                 |                 |                  |        |             |       |       | 6.61             |          |            |                               |                         |             |            |          |         |            |           |
| Staphylococcus aureus      | 3,110            |                 |                 |                  |        |             |       |       | 68.3             |          | 190        |                               |                         | 2,800       |            |          | 26.8    | 30.1       |           |
| Streptococcus pneumoniae   | 717              |                 |                 |                  | 13.7   | 283         | 10.2  |       | 28.7             |          | 114        |                               |                         |             | 70.3       |          | 198     |            |           |
| All pathogens              | 11,200           | 320             | 242             | 525              | 680    | 1,400       | 1,440 | 57    | 2,120            | 4.1      | 440        | 1.47                          | 32.1                    | 2,800       | 77.4       | 1.95     | 744     | 319        | 5.45      |
|                            | Resistance to 1+ | Aminoglycosides | Aminopenicillin | Anti-pseudomonal | BL-BLI | Carbapenems | 3GC   | 4GC   | Fluoroquinolones | Mono INH | Macrolides | MDR in S. Typhi and Paratyphi | MDR excluding XDR in TB | Methicillin | Penicillin | Mono RIF | TMP-SMX | Vancomycin | XDR in TB |

Counts

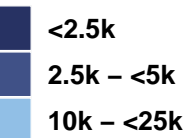

# Cuba

DALYs (count) associated with bacterial antimicrobial resistance by pathogen–drug combinations, 2019

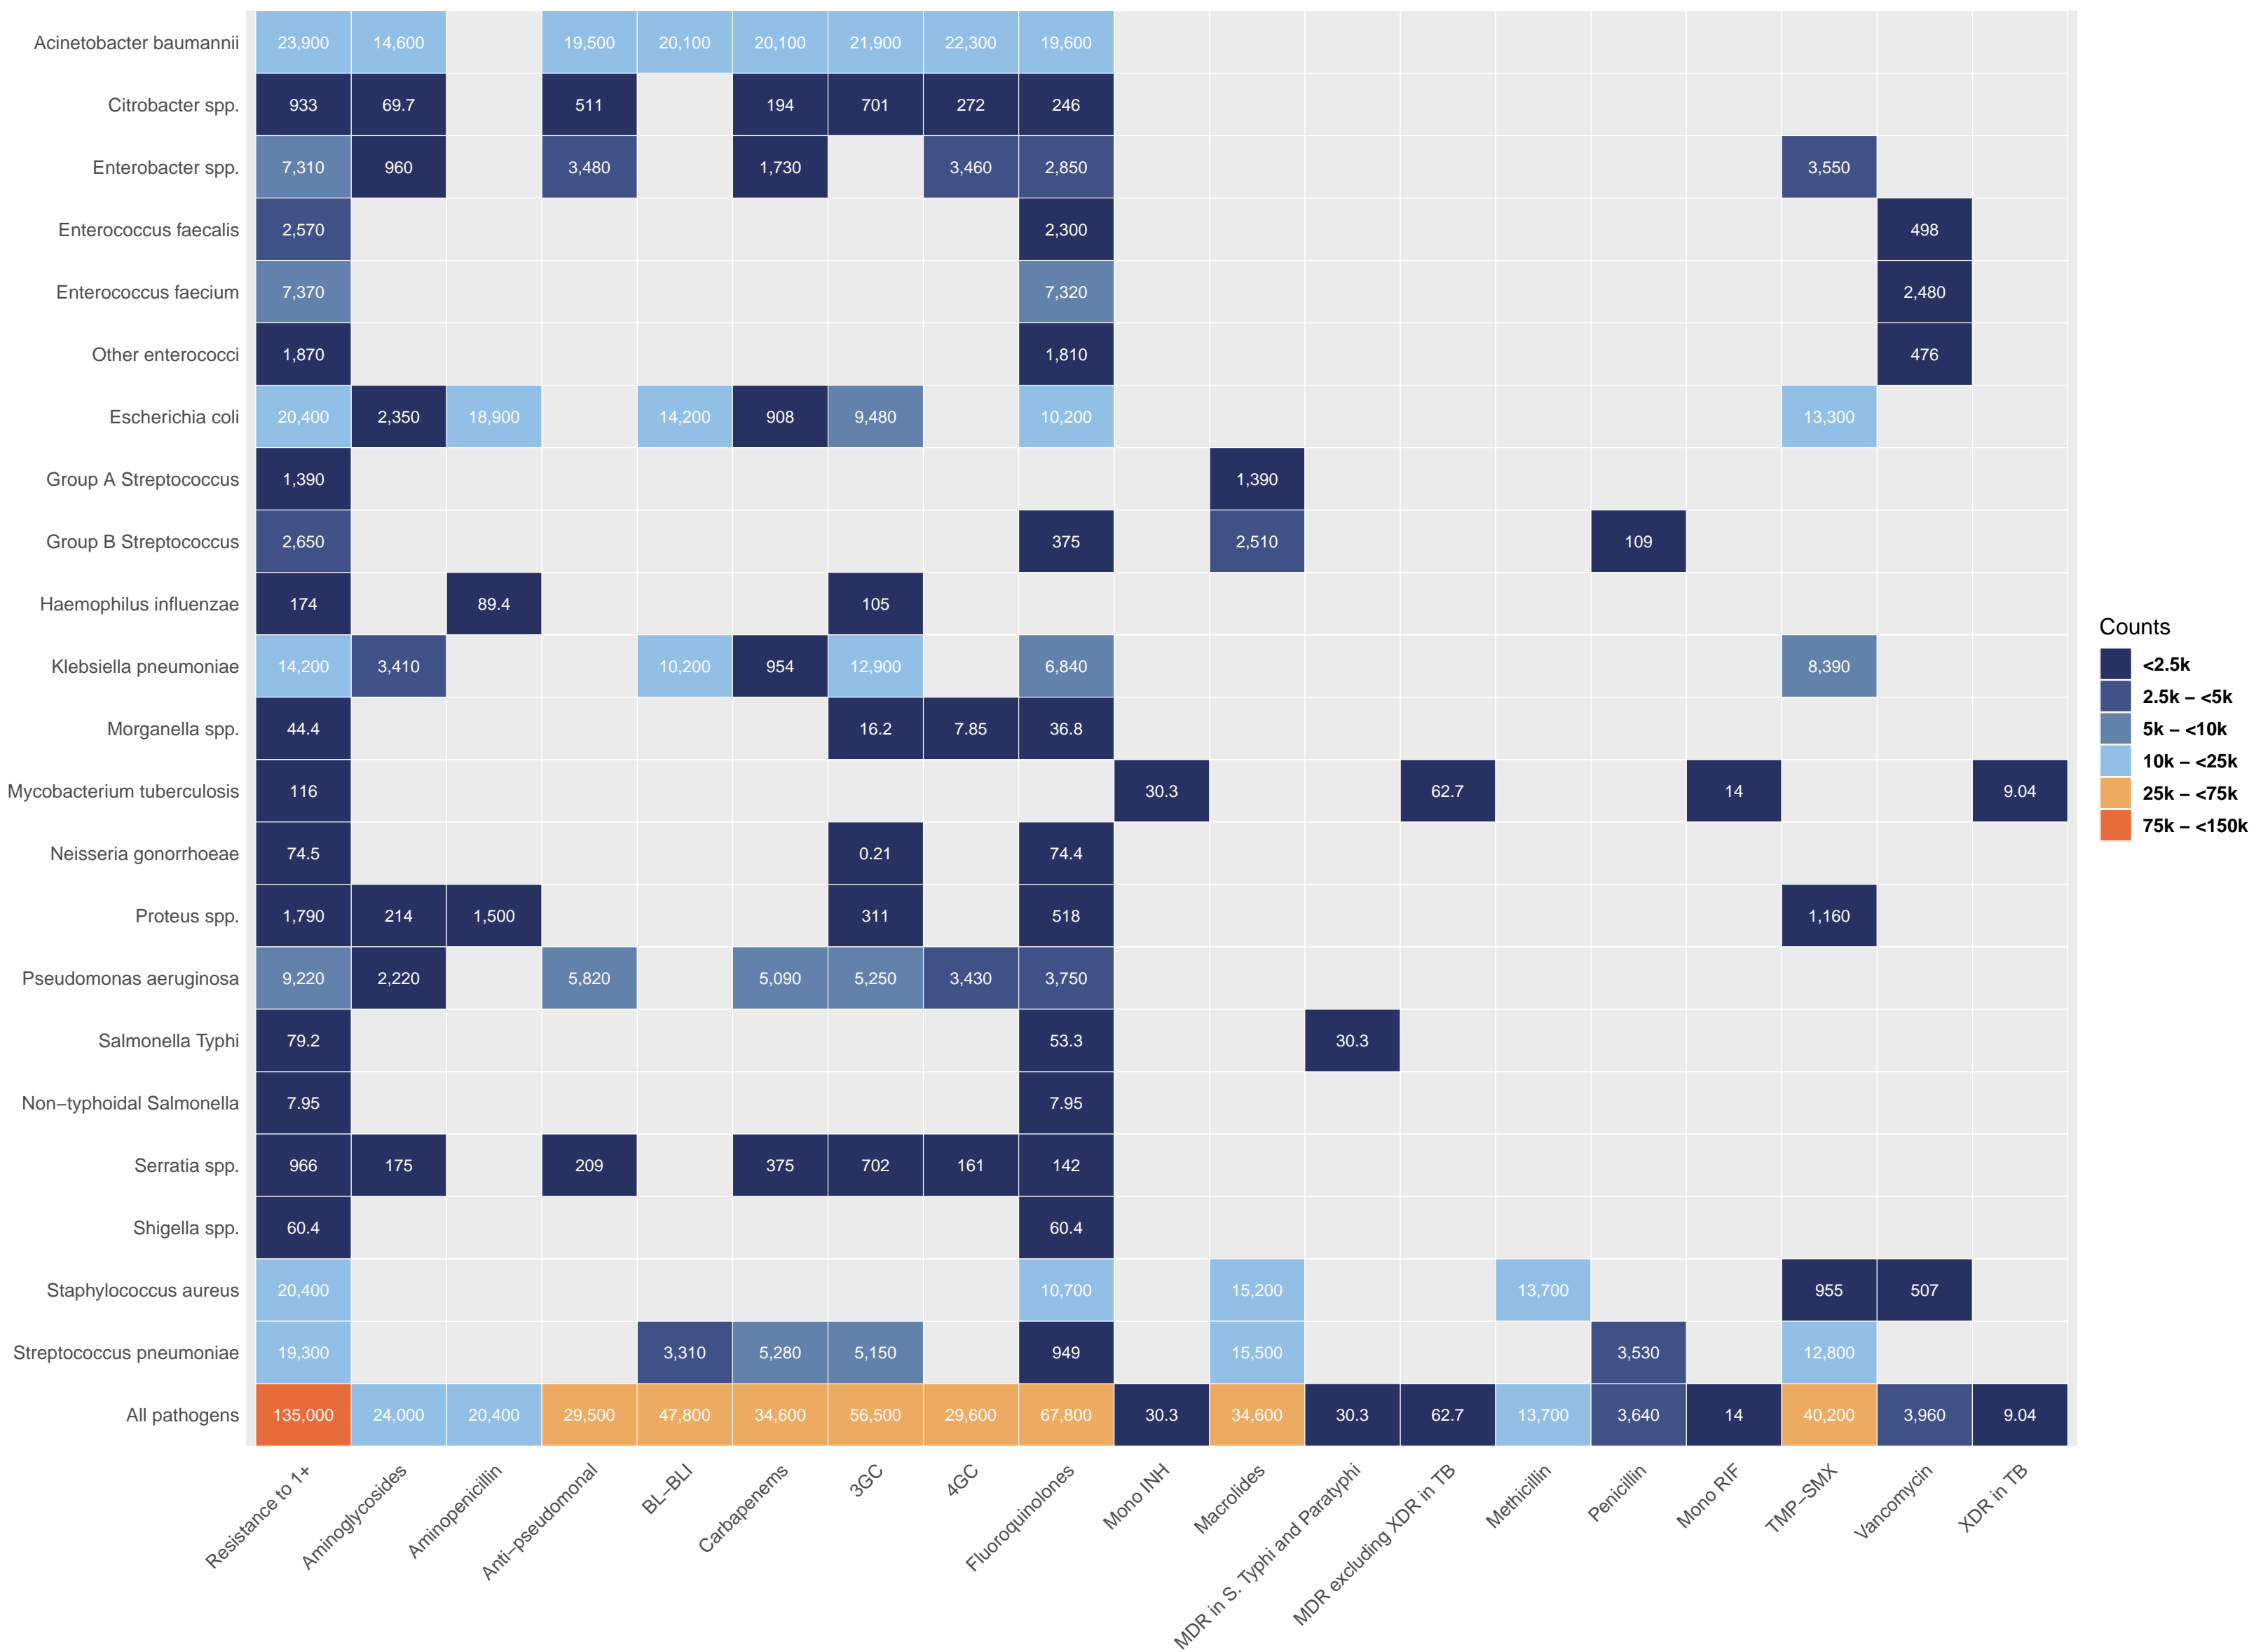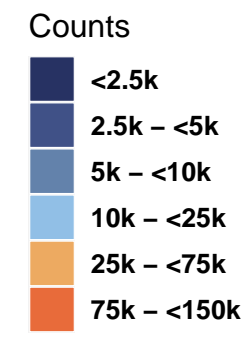

# Cuba

DALYs (count) *attributable to bacterial antimicrobial resistance by pathogen–drug combinations, 2019*

|                            |                  |                 |                 |                  |        |             |       |      |                  |          |            |                               |                         |             |            |          |         |            |           |
|----------------------------|------------------|-----------------|-----------------|------------------|--------|-------------|-------|------|------------------|----------|------------|-------------------------------|-------------------------|-------------|------------|----------|---------|------------|-----------|
| Acinetobacter baumannii    | 7,530            | 625             |                 | 297              | 62.2   | 3,430       | 311   | 374  | 2,430            |          |            |                               |                         |             |            |          |         |            |           |
| Citrobacter spp.           | 274              | 4.25            |                 | 112              |        | 52.2        | 49.1  | 19   | 37.8             |          |            |                               |                         |             |            |          |         |            |           |
| Enterobacter spp.          | 1,680            | 61.3            |                 | 419              |        | 443         |       | 193  | 345              |          |            |                               |                         |             |            | 220      |         |            |           |
| Enterococcus faecalis      | 724              |                 |                 |                  |        |             |       |      | 558              |          |            |                               |                         |             |            |          |         | 165        |           |
| Enterococcus faecium       | 1,930            |                 |                 |                  |        |             |       |      | 1,360            |          |            |                               |                         |             |            |          |         | 575        |           |
| Other enterococci          | 416              |                 |                 |                  |        |             |       |      | 328              |          |            |                               |                         |             |            |          |         | 87.4       |           |
| Escherichia coli           | 4,840            | 147             | 361             |                  | 796    | 215         | 1,410 |      | 1,080            |          |            |                               |                         |             |            |          | 828     |            |           |
| Group A Streptococcus      | 133              |                 |                 |                  |        |             |       |      |                  |          | 133        |                               |                         |             |            |          |         |            |           |
| Group B Streptococcus      | 337              |                 |                 |                  |        |             |       |      | 59.9             |          | 256        |                               |                         | 20.6        |            |          |         |            |           |
| Haemophilus influenzae     | 43.7             |                 | 12.7            |                  |        |             | 31    |      |                  |          |            |                               |                         |             |            |          |         |            |           |
| Klebsiella pneumoniae      | 3,940            | 292             |                 |                  | 125    | 277         | 2,280 |      | 522              |          |            |                               |                         |             |            |          | 445     |            |           |
| Morganella spp.            | 10.4             |                 |                 |                  |        |             | 2.4   | 1.51 | 6.5              |          |            |                               |                         |             |            |          |         |            |           |
| Mycobacterium tuberculosis | 37.7             |                 |                 |                  |        |             |       |      |                  | 3.53     |            |                               | 26.6                    |             |            | 3.09     |         |            | 4.52      |
| Neisseria gonorrhoeae      | 7.25             |                 |                 |                  |        |             | 0.085 |      | 7.16             |          |            |                               |                         |             |            |          |         |            |           |
| Proteus spp.               | 206              | 11.2            | 35.2            |                  |        |             | 73.9  |      | 36.5             |          |            |                               |                         |             |            |          | 48.7    |            |           |
| Pseudomonas aeruginosa     | 2,340            | 62.7            |                 | 645              |        | 975         | 217   | 36.3 | 406              |          |            |                               |                         |             |            |          |         |            |           |
| Salmonella Typhi           | 14.5             |                 |                 |                  |        |             |       |      | 10.8             |          |            | 3.7                           |                         |             |            |          |         |            |           |
| Non-typhoidal Salmonella   | 1.05             |                 |                 |                  |        |             |       |      | 1.05             |          |            |                               |                         |             |            |          |         |            |           |
| Serratia spp.              | 268              | 10.5            |                 | 41.1             |        | 106         | 85.3  | 9.4  | 15.4             |          |            |                               |                         |             |            |          |         |            |           |
| Shigella spp.              | 8.62             |                 |                 |                  |        |             |       |      | 8.62             |          |            |                               |                         |             |            |          |         |            |           |
| Staphylococcus aureus      | 4,900            |                 |                 |                  |        |             |       |      | 494              |          | 613        |                               |                         | 3,580       |            |          | 80.6    | 137        |           |
| Streptococcus pneumoniae   | 3,510            |                 |                 |                  | 39.2   | 1,160       | 344   |      | 109              |          | 662        |                               |                         |             | 105        |          | 1,100   |            |           |
| All pathogens              | 33,200           | 1,210           | 408             | 1,510            | 1,020  | 6,660       | 4,810 | 633  | 7,820            | 3.53     | 1,660      | 3.7                           | 26.6                    | 3,580       | 125        | 3.09     | 2,720   | 964        | 4.52      |
|                            | Resistance to 1+ | Aminoglycosides | Aminopenicillin | Anti-pseudomonal | BL-BLI | Carbapenems | 3GC   | 4GC  | Fluoroquinolones | Mono INH | Macrolides | MDR in S. Typhi and Paratyphi | MDR excluding XDR in TB | Methicillin | Penicillin | Mono RIF | TMP-SMX | Vancomycin | XDR in TB |

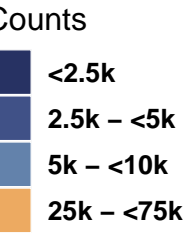

# Dominica

DALYs (count) associated with bacterial antimicrobial resistance by pathogen–drug combinations, 2019

|                            |                  |                 |                 |                  |        |             |      |       |                  |          |            |                               |                         |             |            |          |         |            |           |
|----------------------------|------------------|-----------------|-----------------|------------------|--------|-------------|------|-------|------------------|----------|------------|-------------------------------|-------------------------|-------------|------------|----------|---------|------------|-----------|
| Acinetobacter baumannii    | 258              | 190             |                 | 241              | 197    | 226         | 245  | 227   | 239              |          |            |                               |                         |             |            |          |         |            |           |
| Citrobacter spp.           | 11.9             | 1.41            |                 | 3.06             |        | 1.36        | 7.87 | 4.09  | 5.31             |          |            |                               |                         |             |            |          |         |            |           |
| Enterobacter spp.          | 95.1             | 19.4            |                 | 39.5             |        | 18.5        |      | 50.5  | 39.3             |          |            |                               |                         |             |            |          | 61.2    |            |           |
| Enterococcus faecalis      | 26.2             |                 |                 |                  |        |             |      |       | 23.8             |          |            |                               |                         |             |            |          |         | 5.02       |           |
| Enterococcus faecium       | 51.6             |                 |                 |                  |        |             |      |       | 51.1             |          |            |                               |                         |             |            |          |         | 17.2       |           |
| Other enterococci          | 39.5             |                 |                 |                  |        |             |      |       | 39.4             |          |            |                               |                         |             |            |          |         | 2.82       |           |
| Escherichia coli           | 179              | 38.4            | 168             |                  | 137    | 10.9        | 95.8 |       | 107              |          |            |                               |                         |             |            |          | 120     |            |           |
| Group A Streptococcus      | 9.18             |                 |                 |                  |        |             |      |       |                  |          | 9.18       |                               |                         |             |            |          |         |            |           |
| Group B Streptococcus      | 27.1             |                 |                 |                  |        |             |      |       | 9.7              |          | 21.2       |                               |                         | 1.54        |            |          |         |            |           |
| Haemophilus influenzae     | 2.93             |                 | 1.85            |                  |        |             |      | 1.47  |                  |          |            |                               |                         |             |            |          |         |            |           |
| Klebsiella pneumoniae      | 187              | 78.4            |                 |                  | 166    | 16.5        | 132  |       | 117              |          |            |                               |                         |             |            |          | 154     |            |           |
| Morganella spp.            | 0.73             |                 |                 |                  |        |             |      | 0.14  | 0.144            | 0.674    |            |                               |                         |             |            |          |         |            |           |
| Mycobacterium tuberculosis | 1.91             |                 |                 |                  |        |             |      |       |                  | 0.266    |            |                               | 1.26                    |             |            | 0.181    |         |            | 0.2       |
| Neisseria gonorrhoeae      | 0.726            |                 |                 |                  |        |             |      | 0.005 |                  | 0.725    |            |                               |                         |             |            |          |         |            |           |
| Proteus spp.               | 25.3             | 1.91            | 24.3            |                  |        |             |      | 5.32  |                  | 10       |            |                               |                         |             |            |          |         | 13.2       |           |
| Pseudomonas aeruginosa     | 118              | 43.1            |                 | 57.8             |        | 86.1        | 65.7 | 46    | 61.8             |          |            |                               |                         |             |            |          |         |            |           |
| Salmonella Typhi           | 4.93             |                 |                 |                  |        |             |      |       | 4.06             |          |            | 1.02                          |                         |             |            |          |         |            |           |
| Non-typhoidal Salmonella   | 0.522            |                 |                 |                  |        |             |      |       | 0.522            |          |            |                               |                         |             |            |          |         |            |           |
| Serratia spp.              | 18.7             | 5.9             |                 | 5.7              |        | 4.23        | 13   | 7.83  | 4.61             |          |            |                               |                         |             |            |          |         |            |           |
| Shigella spp.              | 0.111            |                 |                 |                  |        |             |      |       | 0.111            |          |            |                               |                         |             |            |          |         |            |           |
| Staphylococcus aureus      | 188              |                 |                 |                  |        |             |      |       | 62.9             |          | 129        |                               |                         | 162         |            |          | 29      | 1.95       |           |
| Streptococcus pneumoniae   | 171              |                 |                 |                  | 34.6   | 50.5        | 23.6 |       | 11.6             |          | 102        |                               |                         | 44          |            |          | 137     |            |           |
| All pathogens              | 1,420            | 378             | 194             | 348              | 534    | 414         | 590  | 336   | 788              | 0.266    | 261        | 1.02                          | 1.26                    | 162         | 45.5       | 0.181    | 514     | 27         | 0.2       |
|                            | Resistance to 1+ | Aminoglycosides | Aminopenicillin | Anti-pseudomonal | BL-BLI | Carbapenems | 3GC  | 4GC   | Fluoroquinolones | Mono INH | Macrolides | MDR in S. Typhi and Paratyphi | MDR excluding XDR in TB | Methicillin | Penicillin | Mono RIF | TMP-SMX | Vancomycin | XDR in TB |

Counts

<2.5k

# Dominica

DALYs (count) *attributable to bacterial antimicrobial resistance by pathogen–drug combinations, 2019*

|                            |                  |                 |                 |                  |        |             |       |       |                  |          |            |                               |                         |             |            |          |         |            |           |
|----------------------------|------------------|-----------------|-----------------|------------------|--------|-------------|-------|-------|------------------|----------|------------|-------------------------------|-------------------------|-------------|------------|----------|---------|------------|-----------|
| Acinetobacter baumannii    | 82.4             | 7.89            |                 | 4.17             | 0.092  | 36.6        | 3.5   | 0.298 | 29.9             |          |            |                               |                         |             |            |          |         |            |           |
| Citrobacter spp.           | 3.35             | 0.079           |                 | 0.648            |        | 0.334       | 0.916 | 0.456 | 0.915            |          |            |                               |                         |             |            |          |         |            |           |
| Enterobacter spp.          | 21.1             | 1.16            |                 | 4.35             |        | 4.3         |       | 3.12  | 4.43             |          |            |                               |                         |             |            |          | 3.71    |            |           |
| Enterococcus faecalis      | 7.39             |                 |                 |                  |        |             |       |       | 5.77             |          |            |                               |                         |             |            |          |         | 1.61       |           |
| Enterococcus faecium       | 13.5             |                 |                 |                  |        |             |       |       | 9.55             |          |            |                               |                         |             |            |          |         | 4          |           |
| Other enterococci          | 8.11             |                 |                 |                  |        |             |       |       | 7.6              |          |            |                               |                         |             |            |          |         | 0.513      |           |
| Escherichia coli           | 44.4             | 2.25            | 2.18            |                  | 6.3    | 2.37        | 13.3  |       | 11.1             |          |            |                               |                         |             |            |          | 6.91    |            |           |
| Group A Streptococcus      | 0.88             |                 |                 |                  |        |             |       |       |                  |          | 0.88       |                               |                         |             |            |          |         |            |           |
| Group B Streptococcus      | 4.09             |                 |                 |                  |        |             |       |       | 1.71             |          | 2.1        |                               |                         | 0.287       |            |          |         |            |           |
| Haemophilus influenzae     | 0.706            |                 | 0.272           |                  |        |             | 0.434 |       |                  |          |            |                               |                         |             |            |          |         |            |           |
| Klebsiella pneumoniae      | 47.6             | 5.83            |                 |                  | 4.56   | 4.19        | 17.5  |       | 7.81             |          |            |                               |                         |             |            |          | 7.76    |            |           |
| Morganella spp.            | 0.163            |                 |                 |                  |        |             | 0.015 | 0.023 | 0.125            |          |            |                               |                         |             |            |          |         |            |           |
| Mycobacterium tuberculosis | 0.889            |                 |                 |                  |        |             |       |       |                  | 0.039    |            |                               | 0.686                   |             |            | 0.048    |         |            | 0.117     |
| Neisseria gonorrhoeae      | 0.072            |                 |                 |                  |        |             | 0.001 |       | 0.07             |          |            |                               |                         |             |            |          |         |            |           |
| Proteus spp.               | 3.11             | 0.105           | 0.571           |                  |        |             | 1.24  |       | 0.712            |          |            |                               |                         |             |            |          | 0.488   |            |           |
| Pseudomonas aeruginosa     | 29.4             | 1.12            |                 | 2.9              |        | 15.7        | 2.67  | 0.585 | 6.42             |          |            |                               |                         |             |            |          |         |            |           |
| Salmonella Typhi           | 0.966            |                 |                 |                  |        |             |       |       | 0.841            |          |            | 0.125                         |                         |             |            |          |         |            |           |
| Non-typhoidal Salmonella   | 0.101            |                 |                 |                  |        |             |       |       | 0.101            |          |            |                               |                         |             |            |          |         |            |           |
| Serratia spp.              | 4.84             | 0.353           |                 | 1.13             |        | 1.13        | 1.01  | 0.716 | 0.492            |          |            |                               |                         |             |            |          |         |            |           |
| Shigella spp.              | 0.019            |                 |                 |                  |        |             |       |       | 0.019            |          |            |                               |                         |             |            |          |         |            |           |
| Staphylococcus aureus      | 54.3             |                 |                 |                  |        |             |       |       | 2.78             |          | 4.75       |                               | 43.9                    |             |            |          | 2.37    | 0.477      |           |
| Streptococcus pneumoniae   | 31.8             |                 |                 |                  | 0.821  | 10.7        | 0.513 |       | 1.38             |          | 4.19       |                               |                         | 1.74        |            |          | 12.5    |            |           |
| All pathogens              | 359              | 18.8            | 3.02            | 13.2             | 11.8   | 75.3        | 41.1  | 5.2   | 91.8             | 0.039    | 11.9       | 0.125                         | 0.686                   | 43.9        | 2.03       | 0.048    | 33.7    | 6.6        | 0.117     |
|                            | Resistance to 1+ | Aminoglycosides | Aminopenicillin | Anti-pseudomonal | BL-BLI | Carbapenems | 3GC   | 4GC   | Fluoroquinolones | Mono INH | Macrolides | MDR in S. Typhi and Paratyphi | MDR excluding XDR in TB | Methicillin | Penicillin | Mono RIF | TMP-SMX | Vancomycin | XDR in TB |

Counts  
  <2.5k



# Dominican Republic

DALYs (count) associated with bacterial antimicrobial resistance by pathogen–drug combinations, 2019

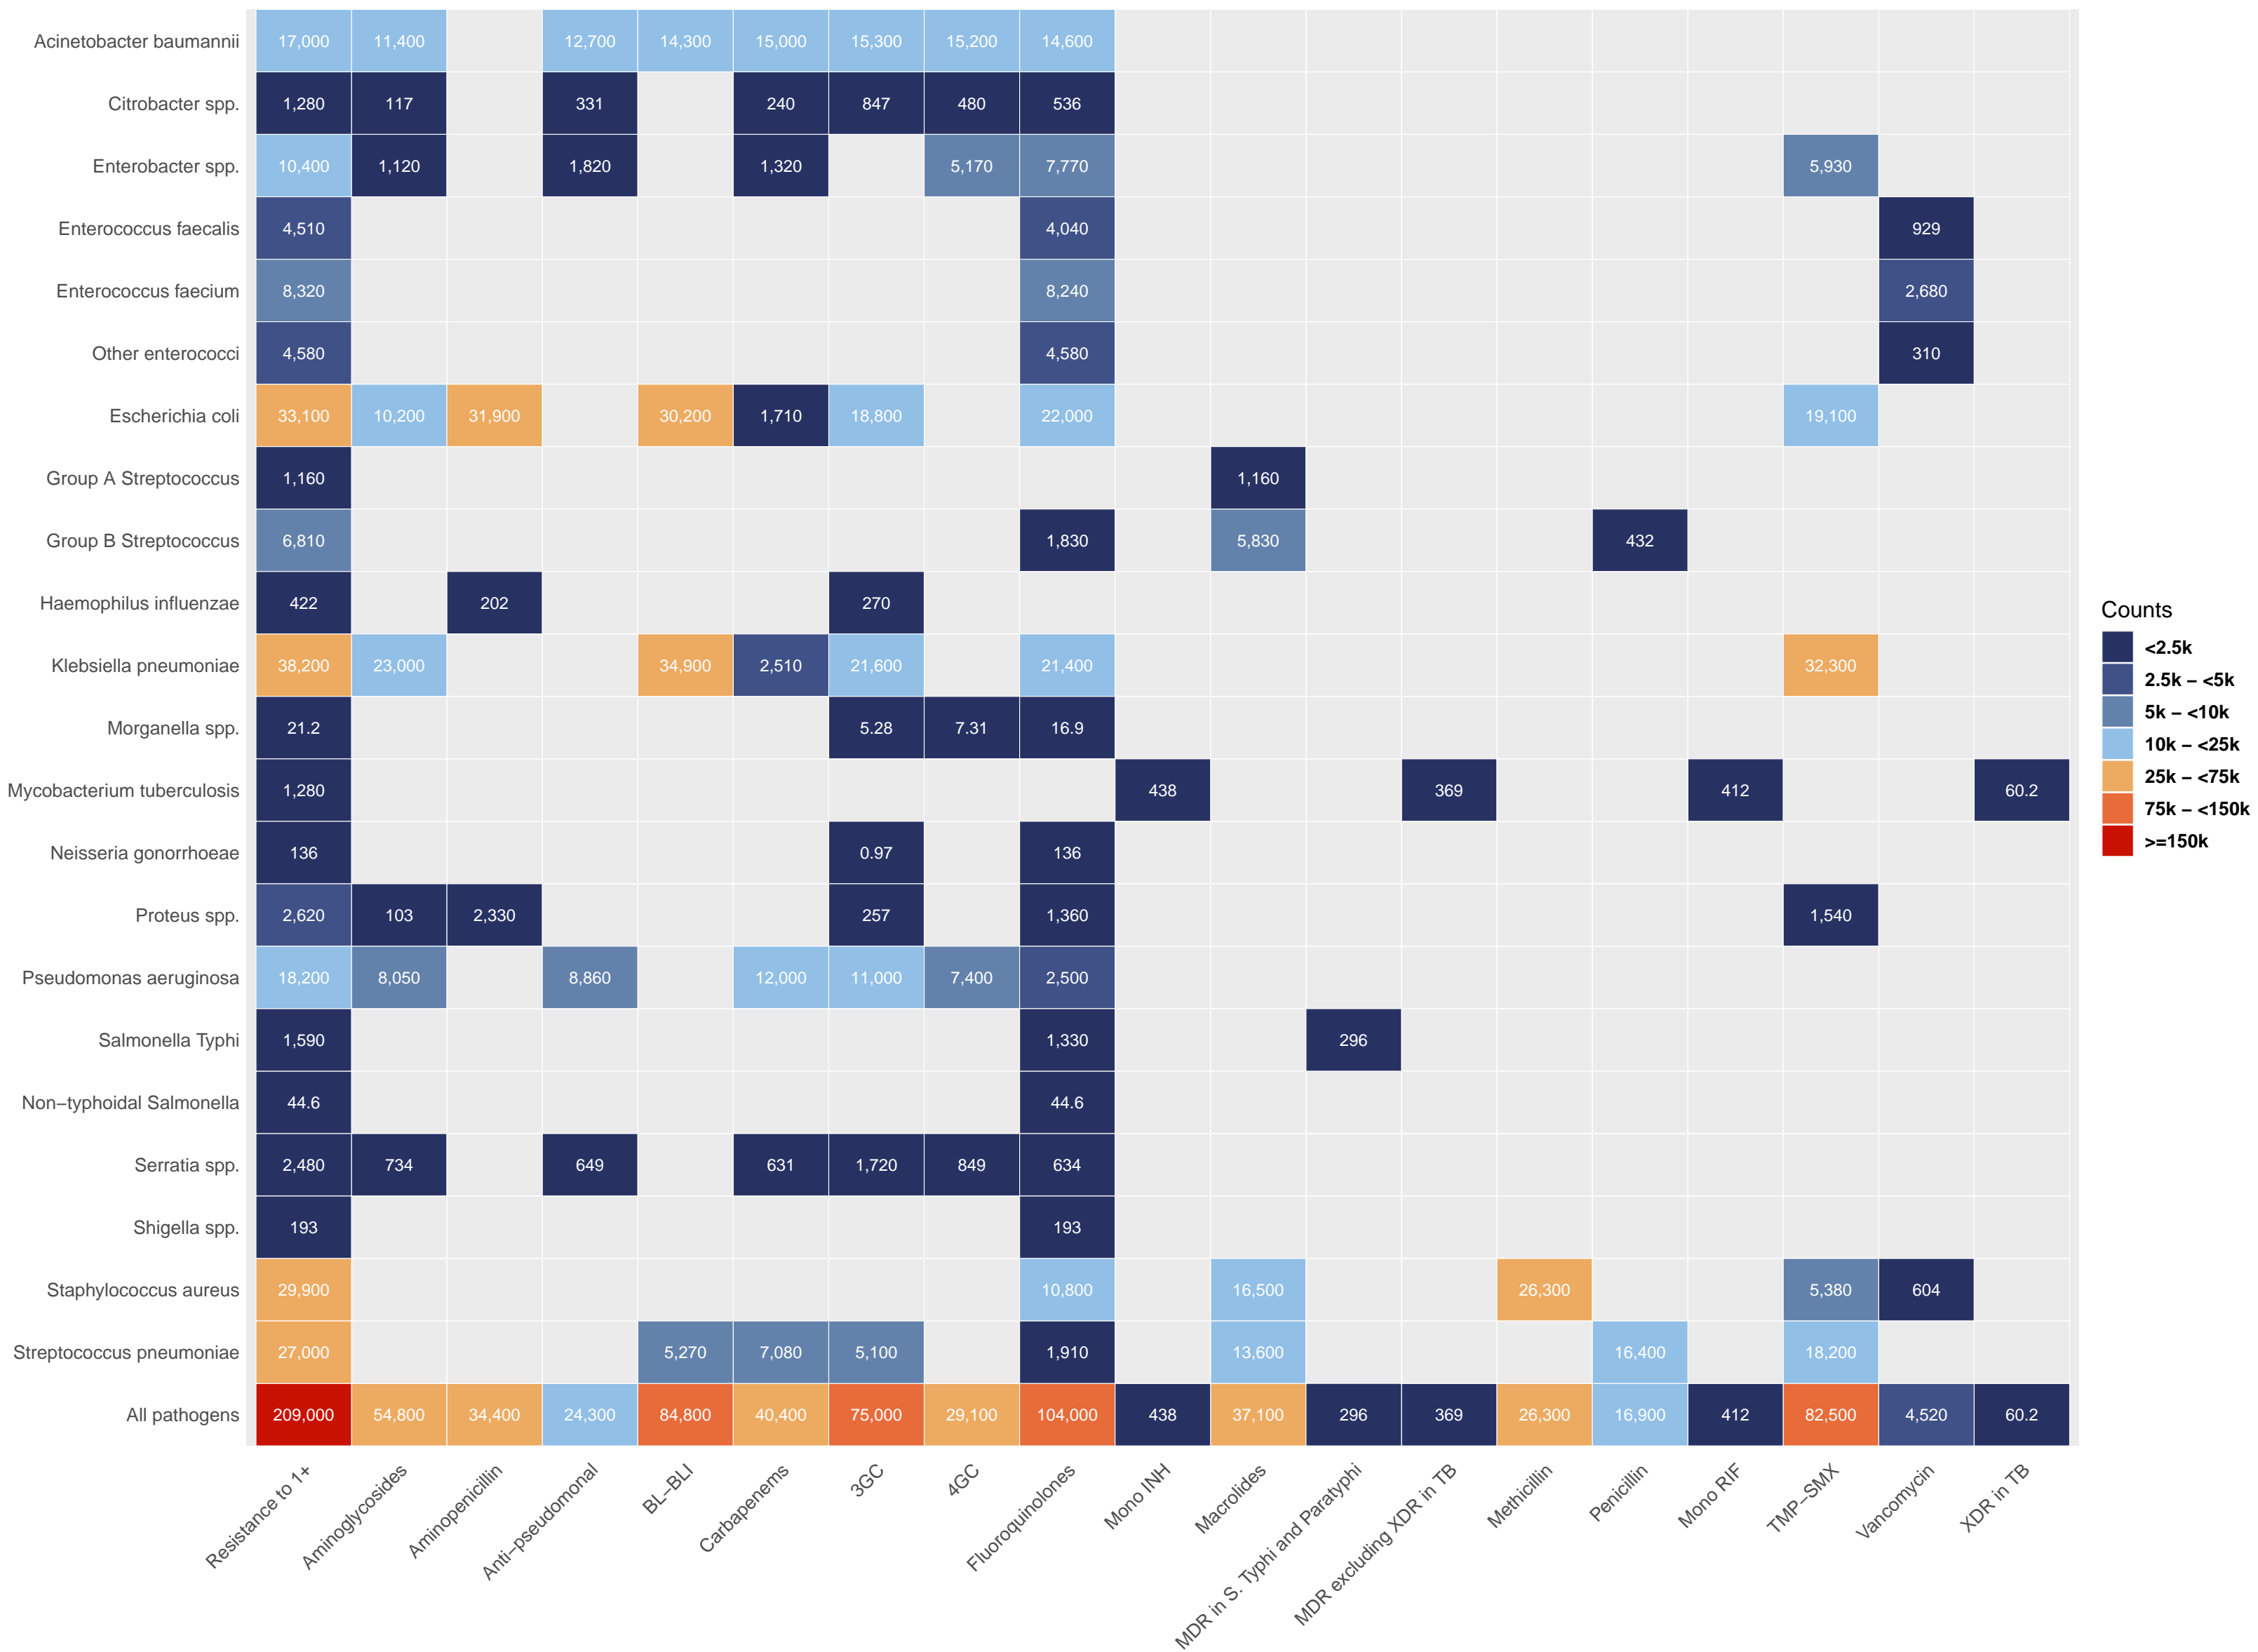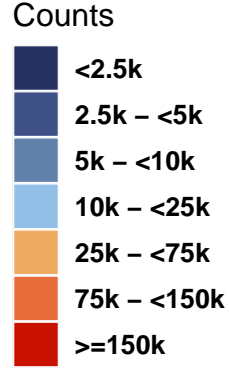

# Dominican Republic

DALYs (count) attributable to bacterial antimicrobial resistance by pathogen–drug combinations, 2019

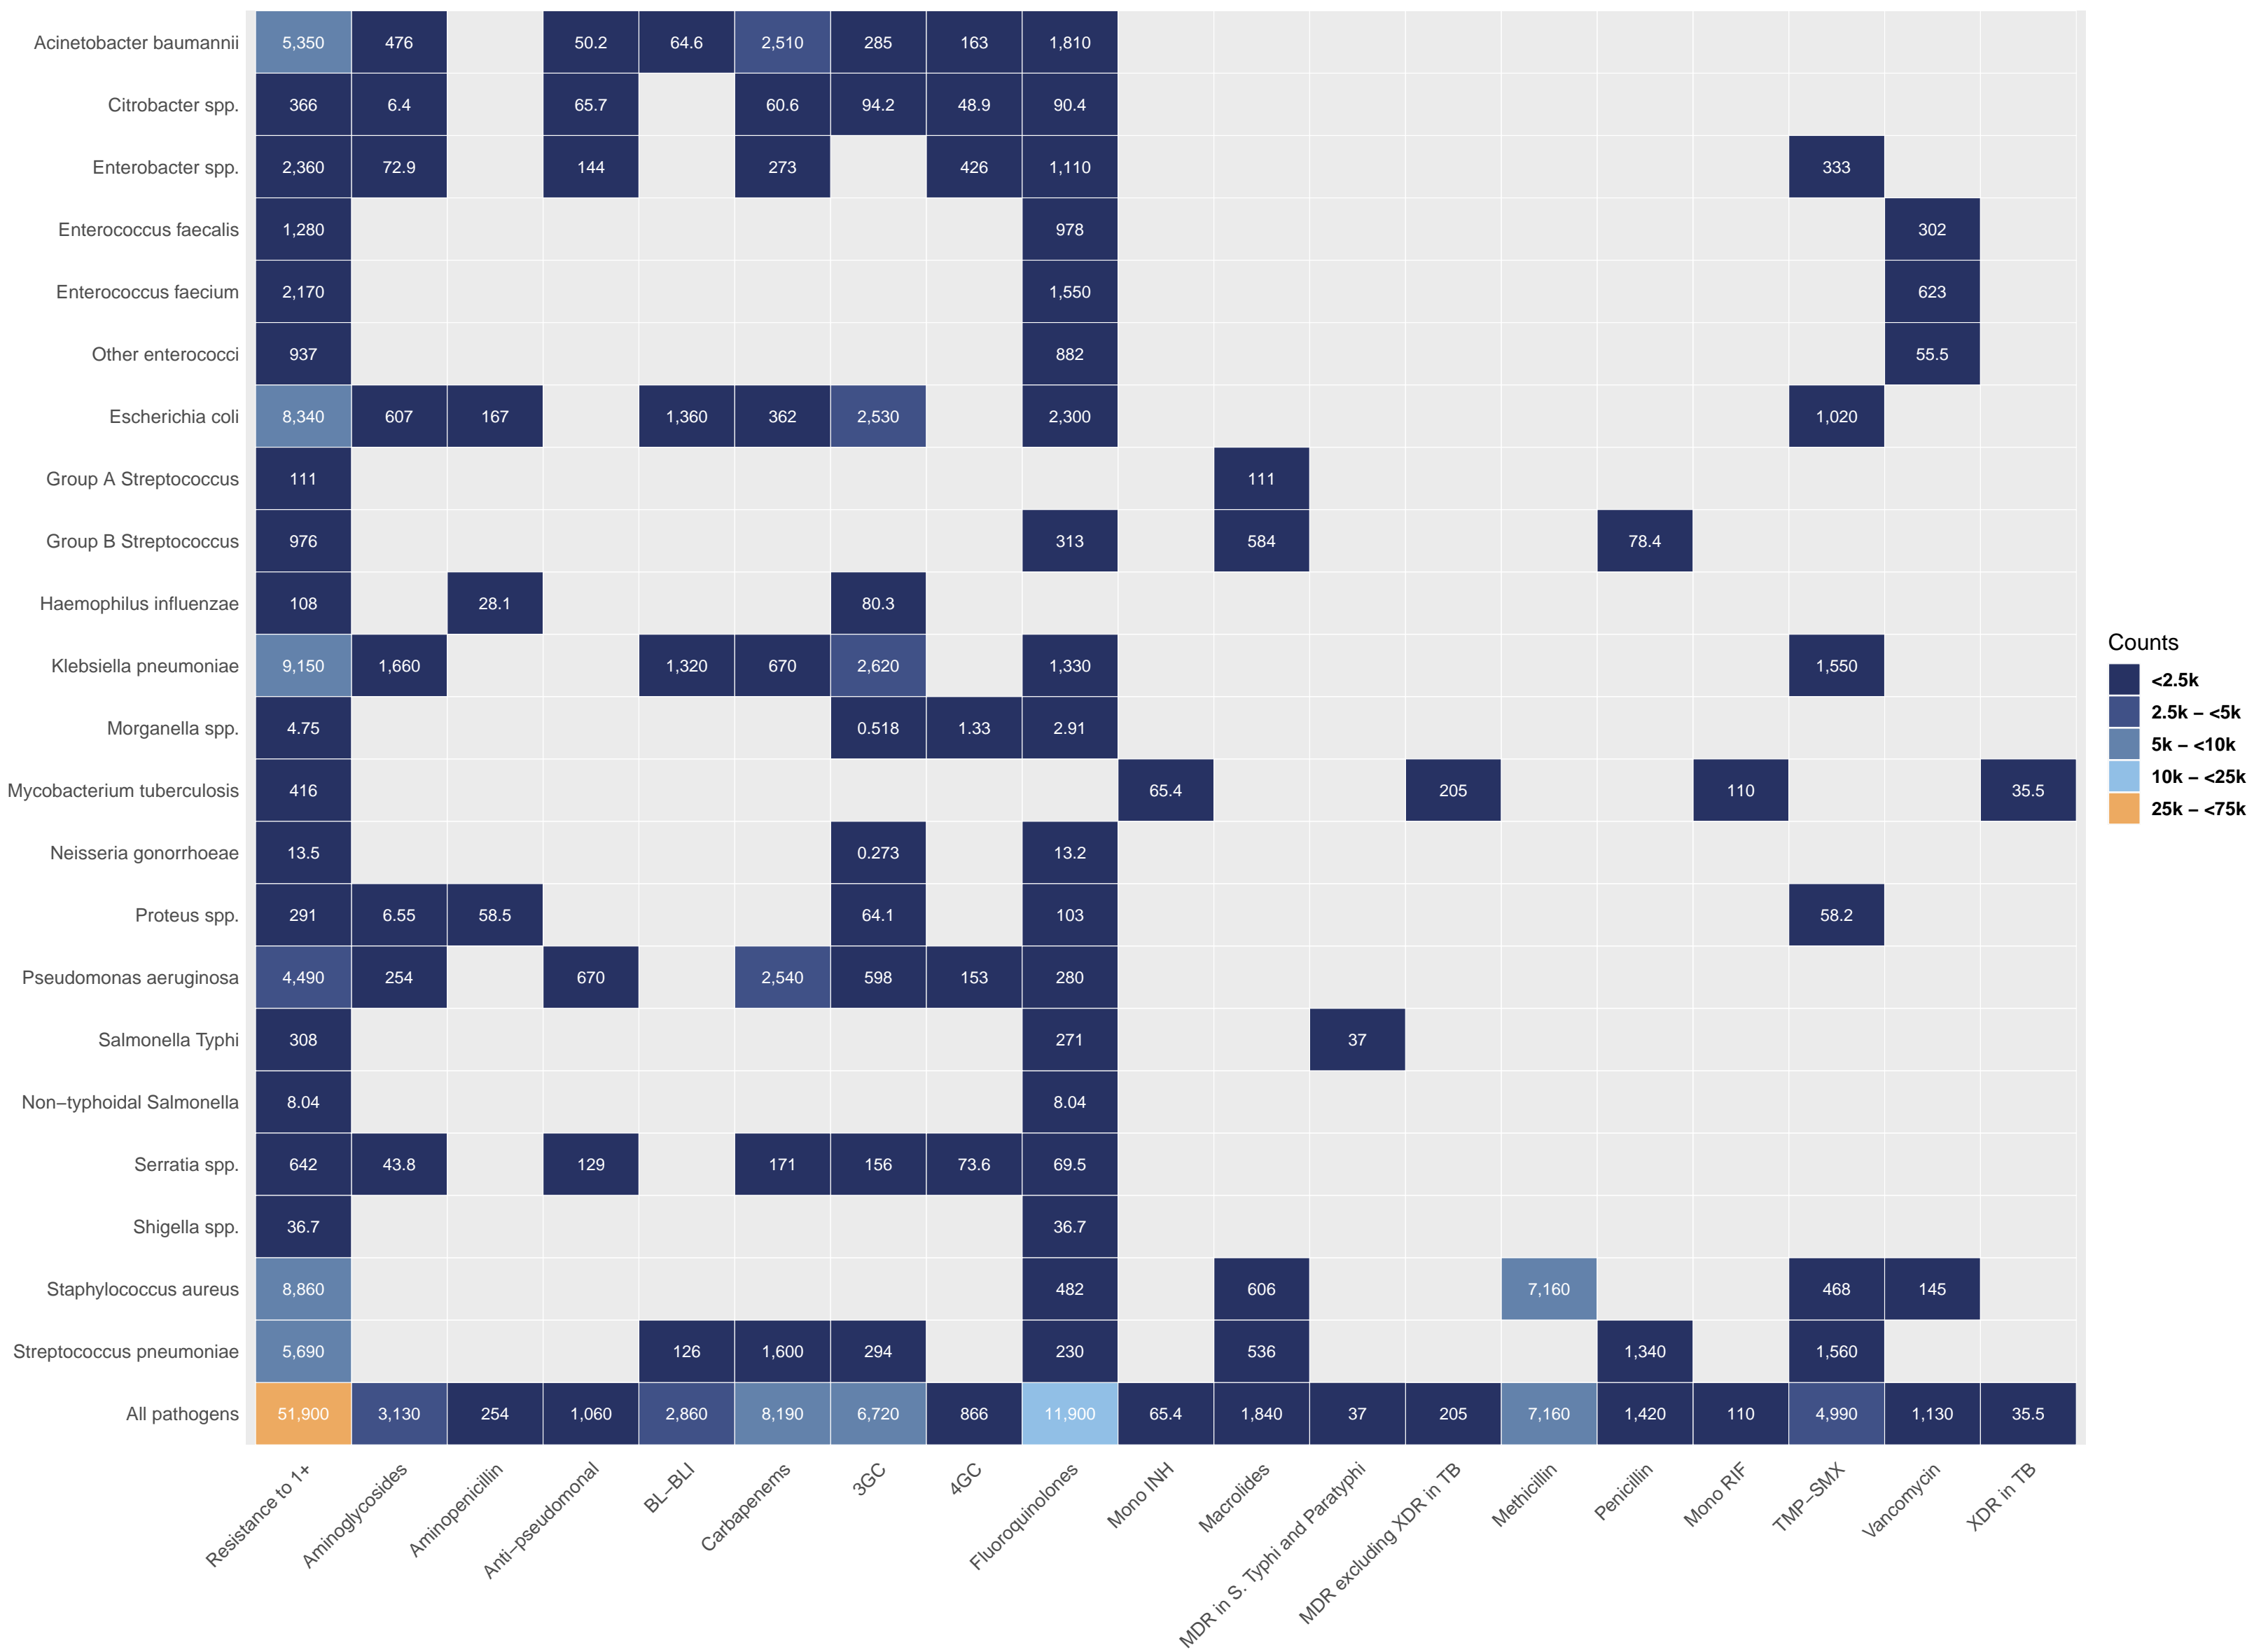

# Ecuador

DALYs (count) associated with bacterial antimicrobial resistance by pathogen–drug combinations, 2019

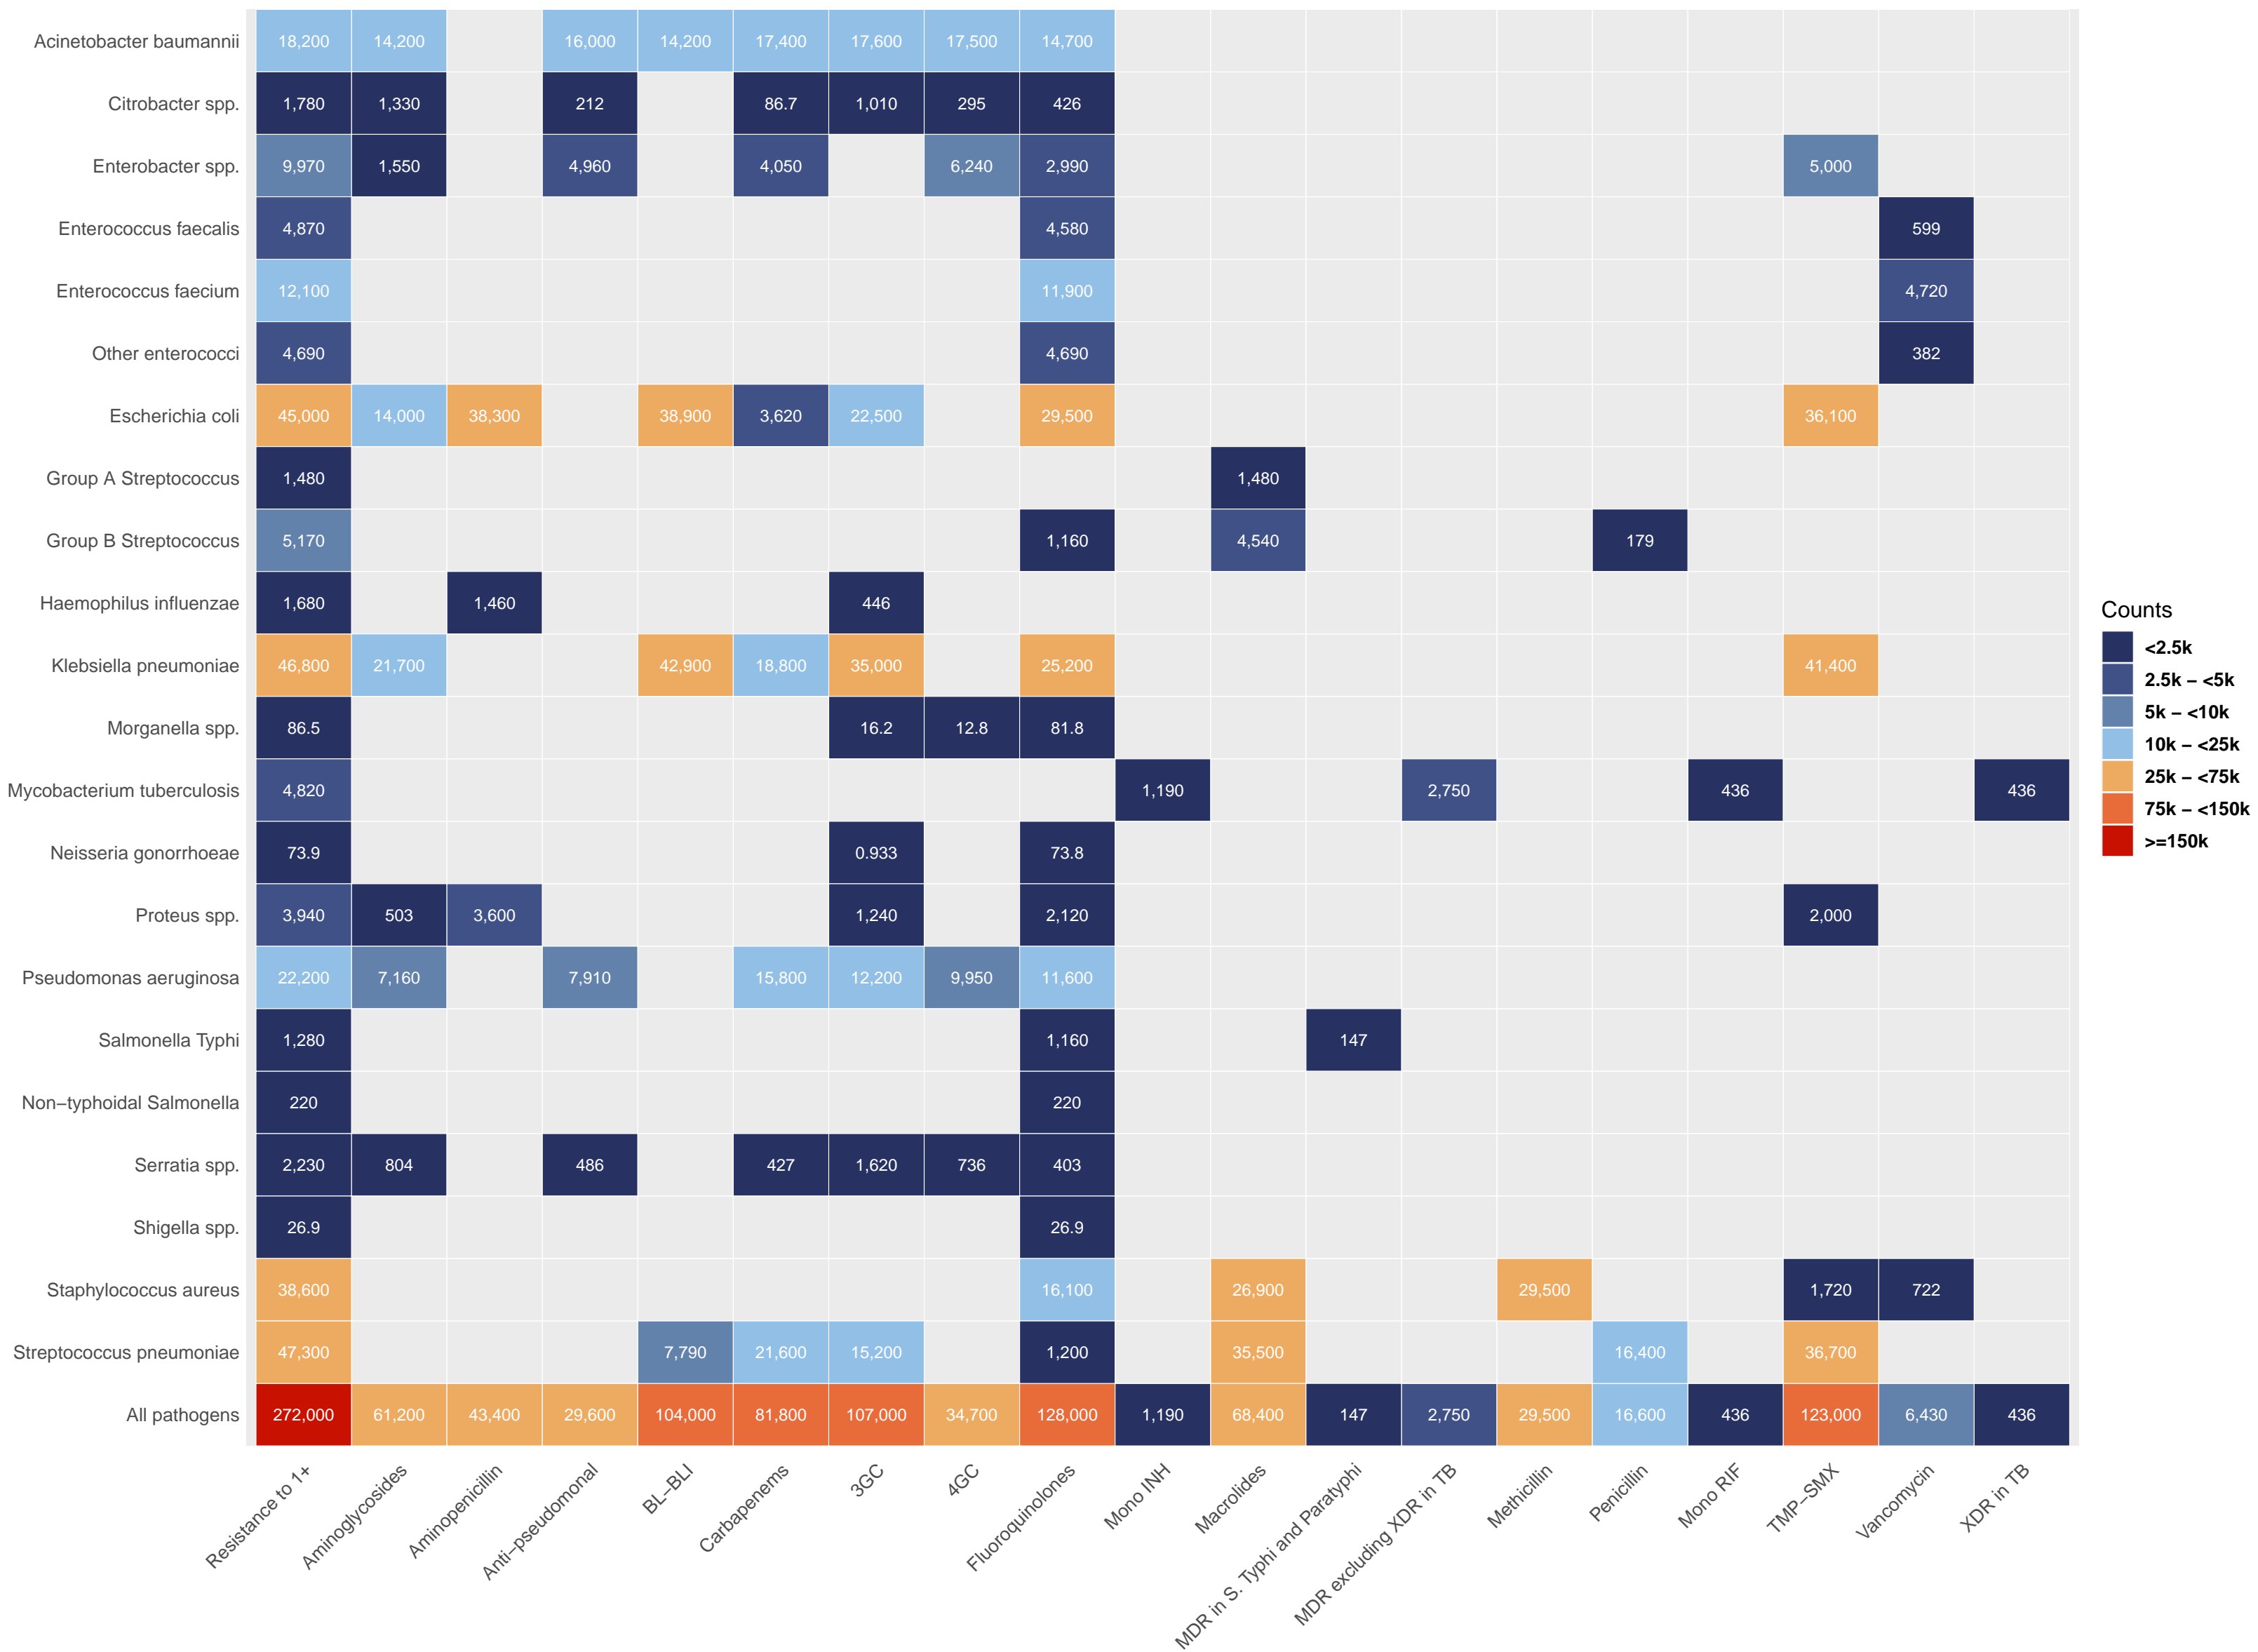

# Ecuador

DALYs (count) attributable to bacterial antimicrobial resistance by pathogen–drug combinations, 2019

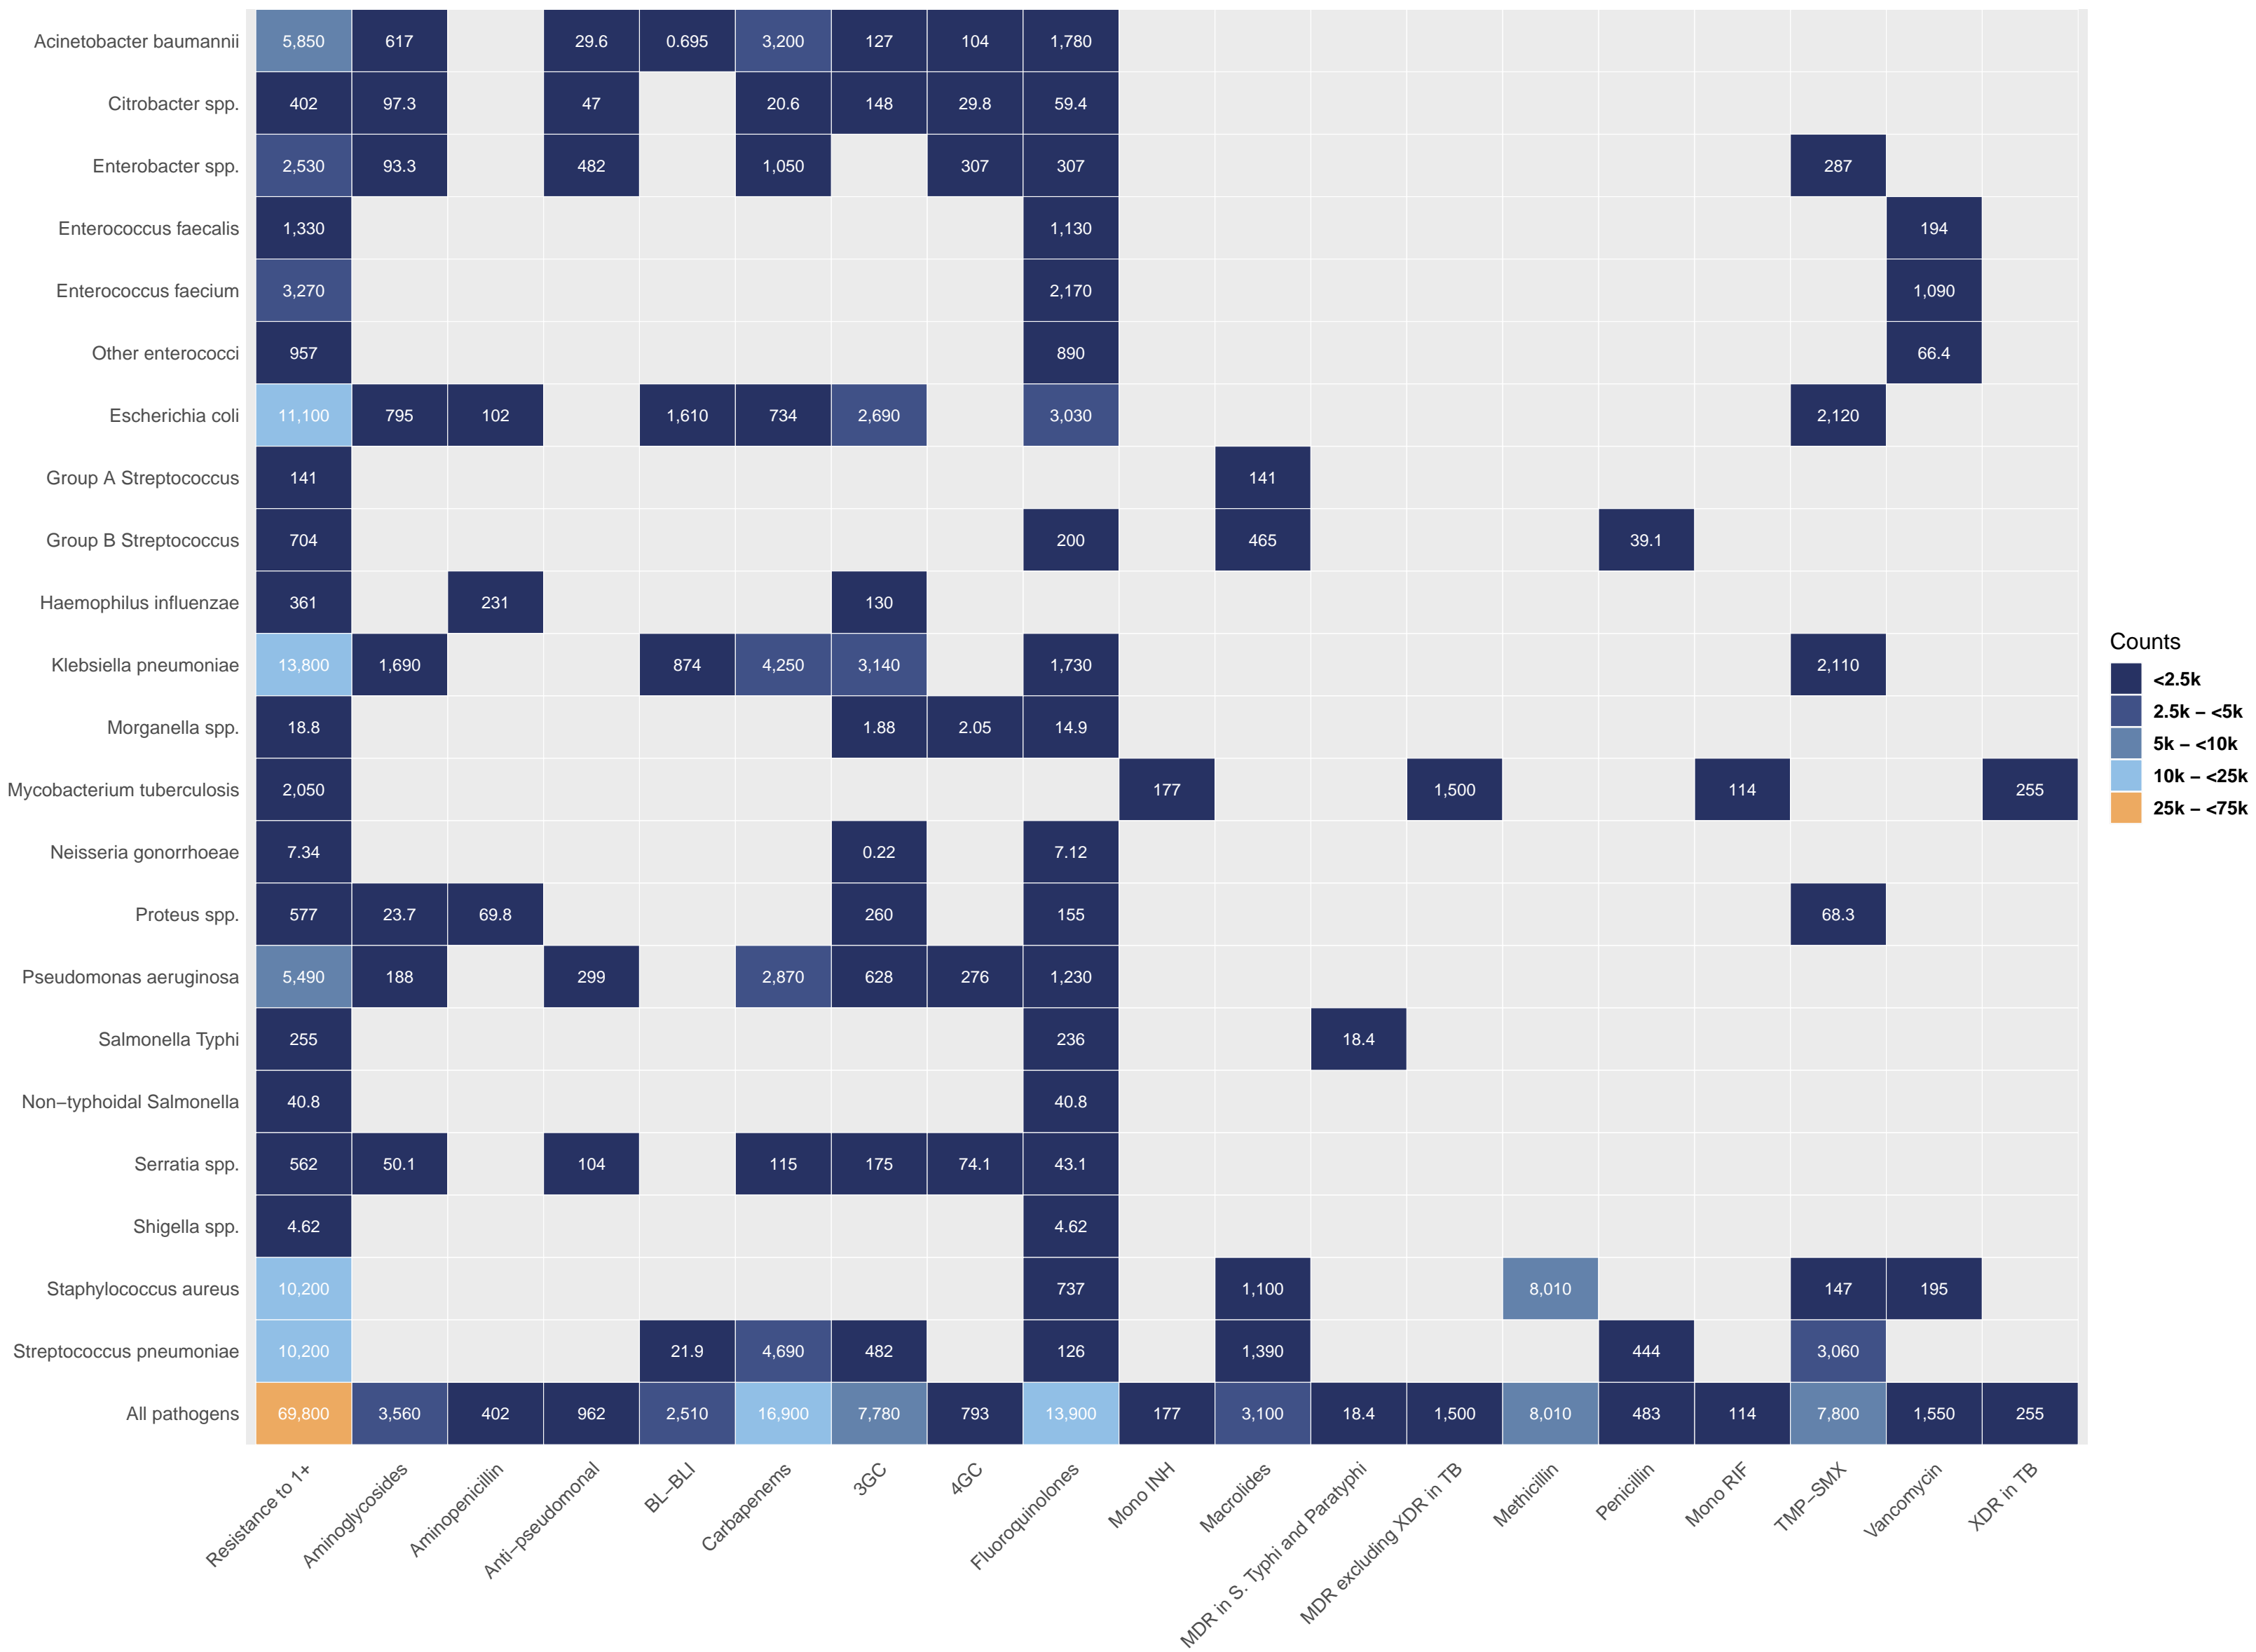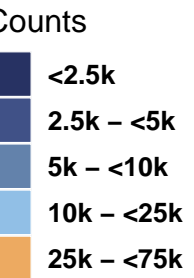

# El Salvador

DALYs (count) associated with bacterial antimicrobial resistance by pathogen–drug combinations, 2019

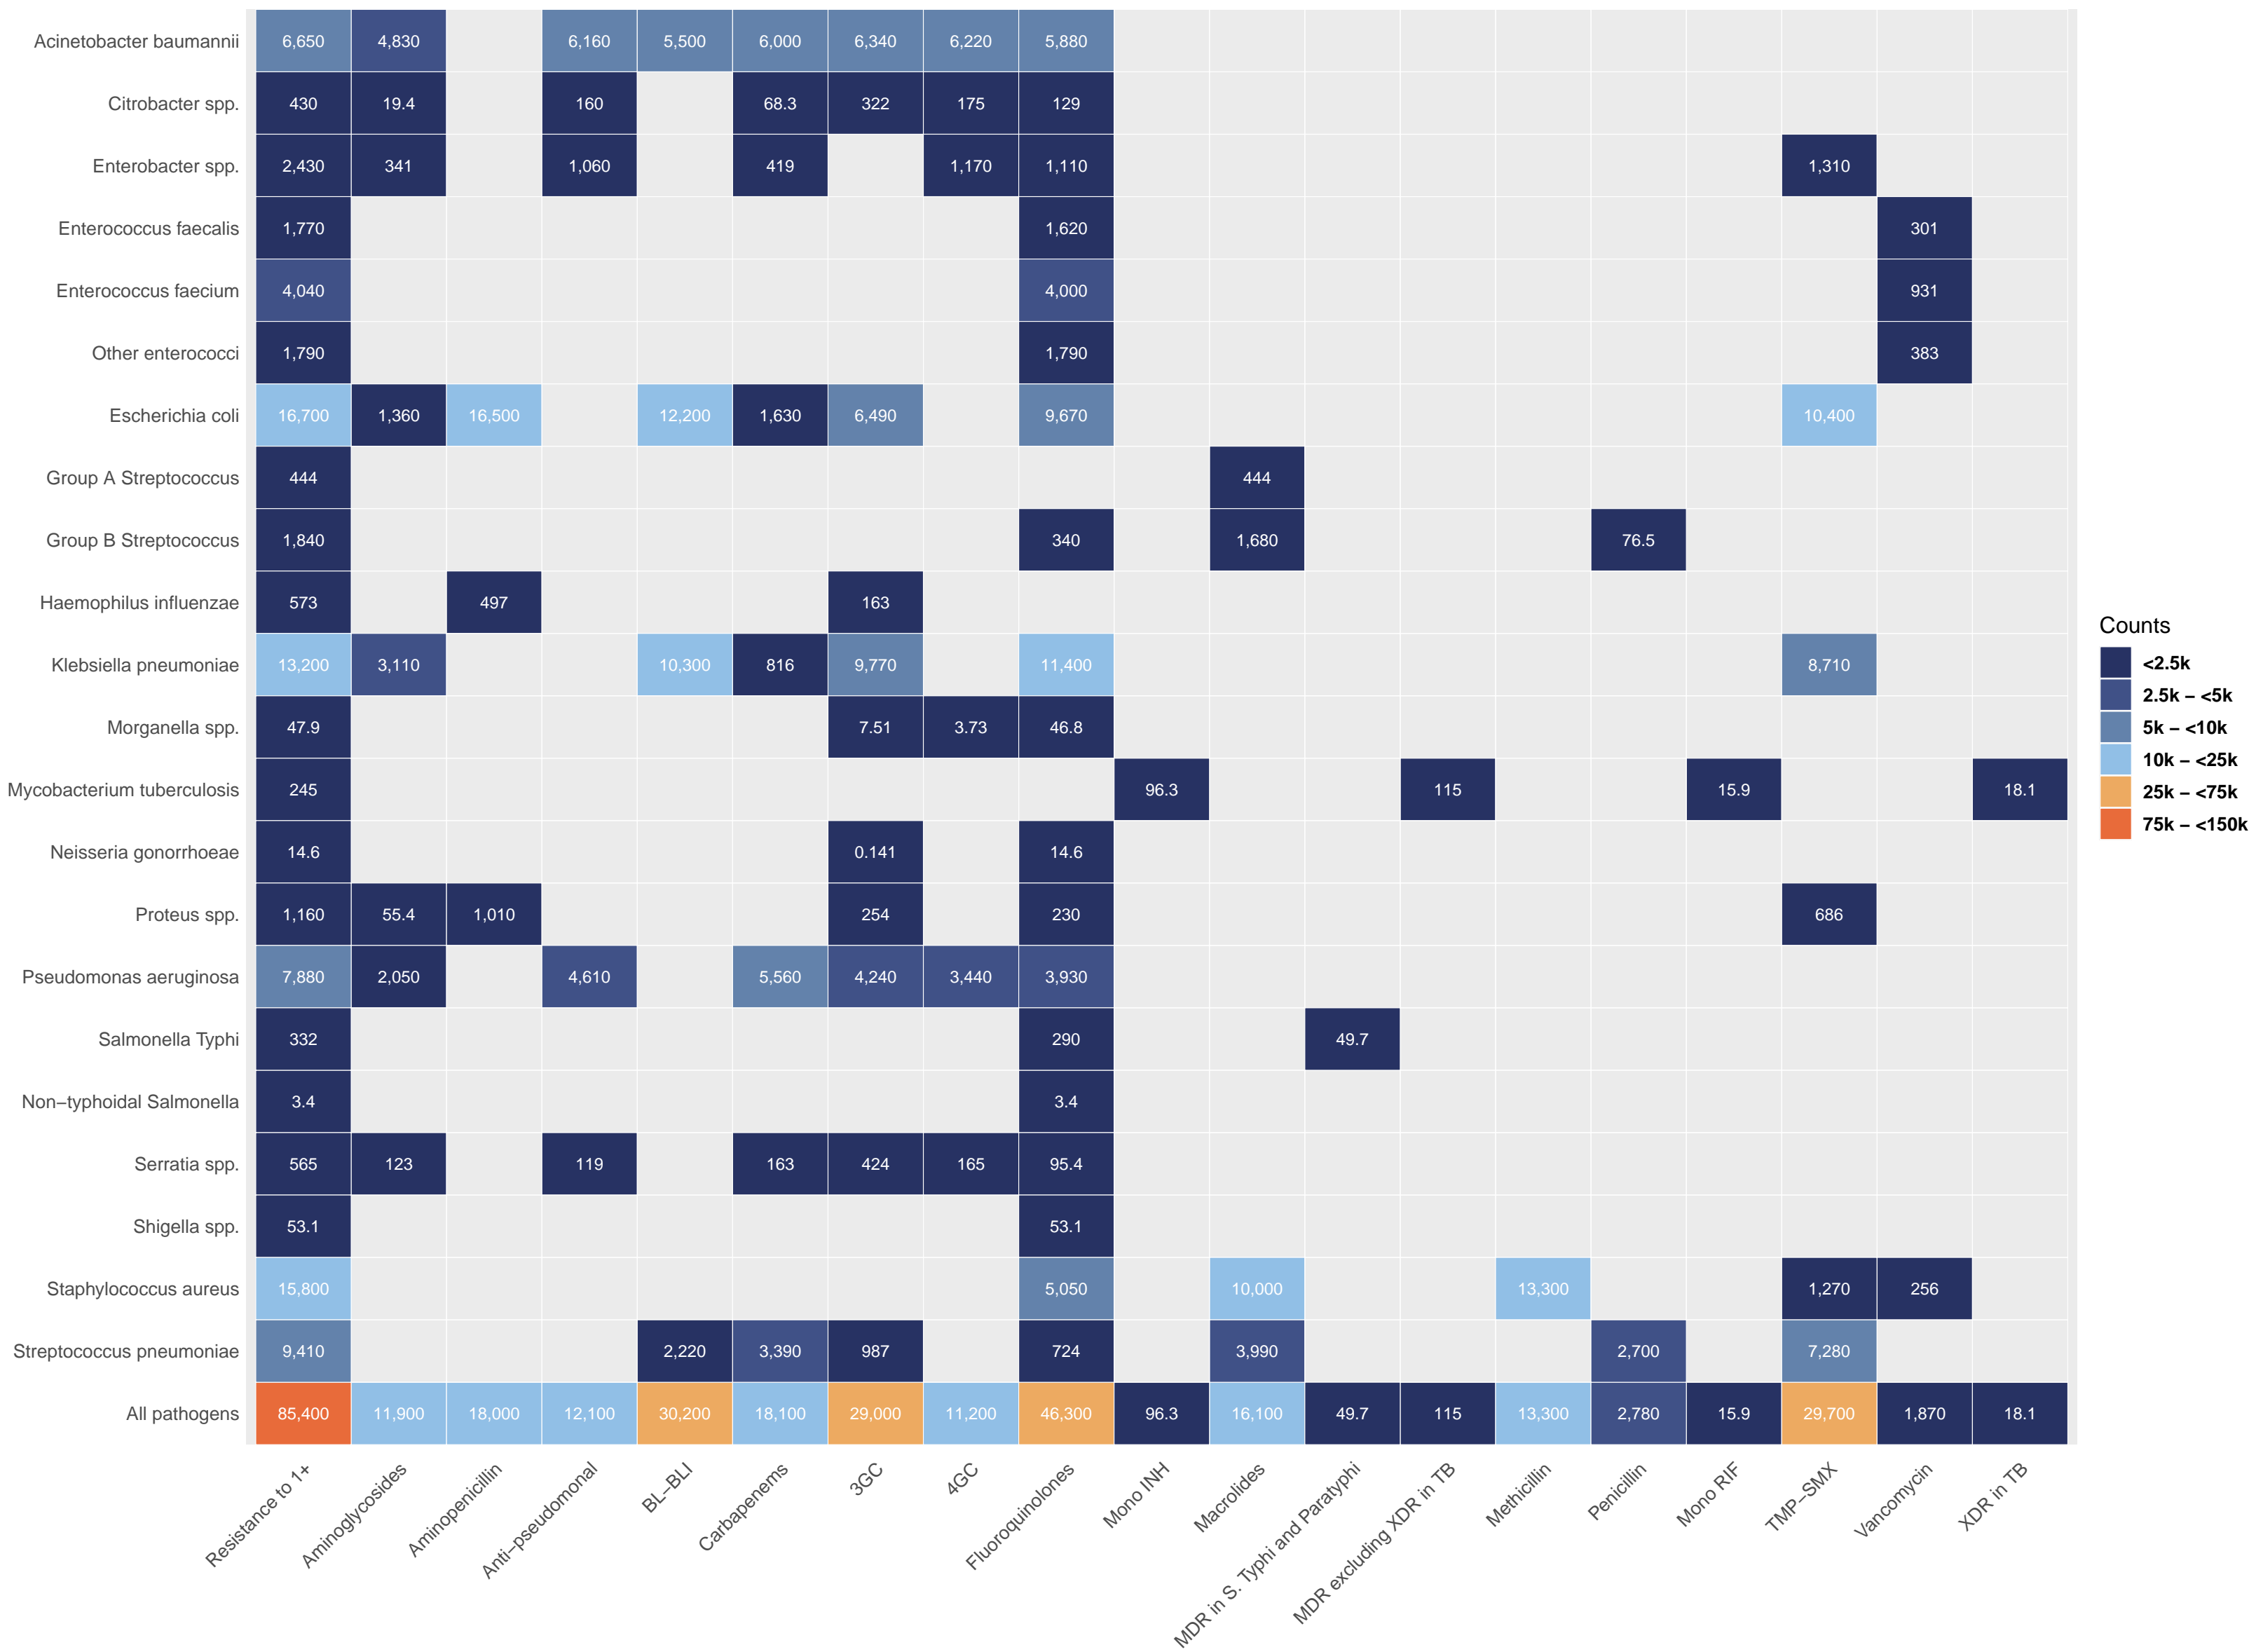

# El Salvador

DALYs (count) *attributable to bacterial antimicrobial resistance by pathogen–drug combinations, 2019*

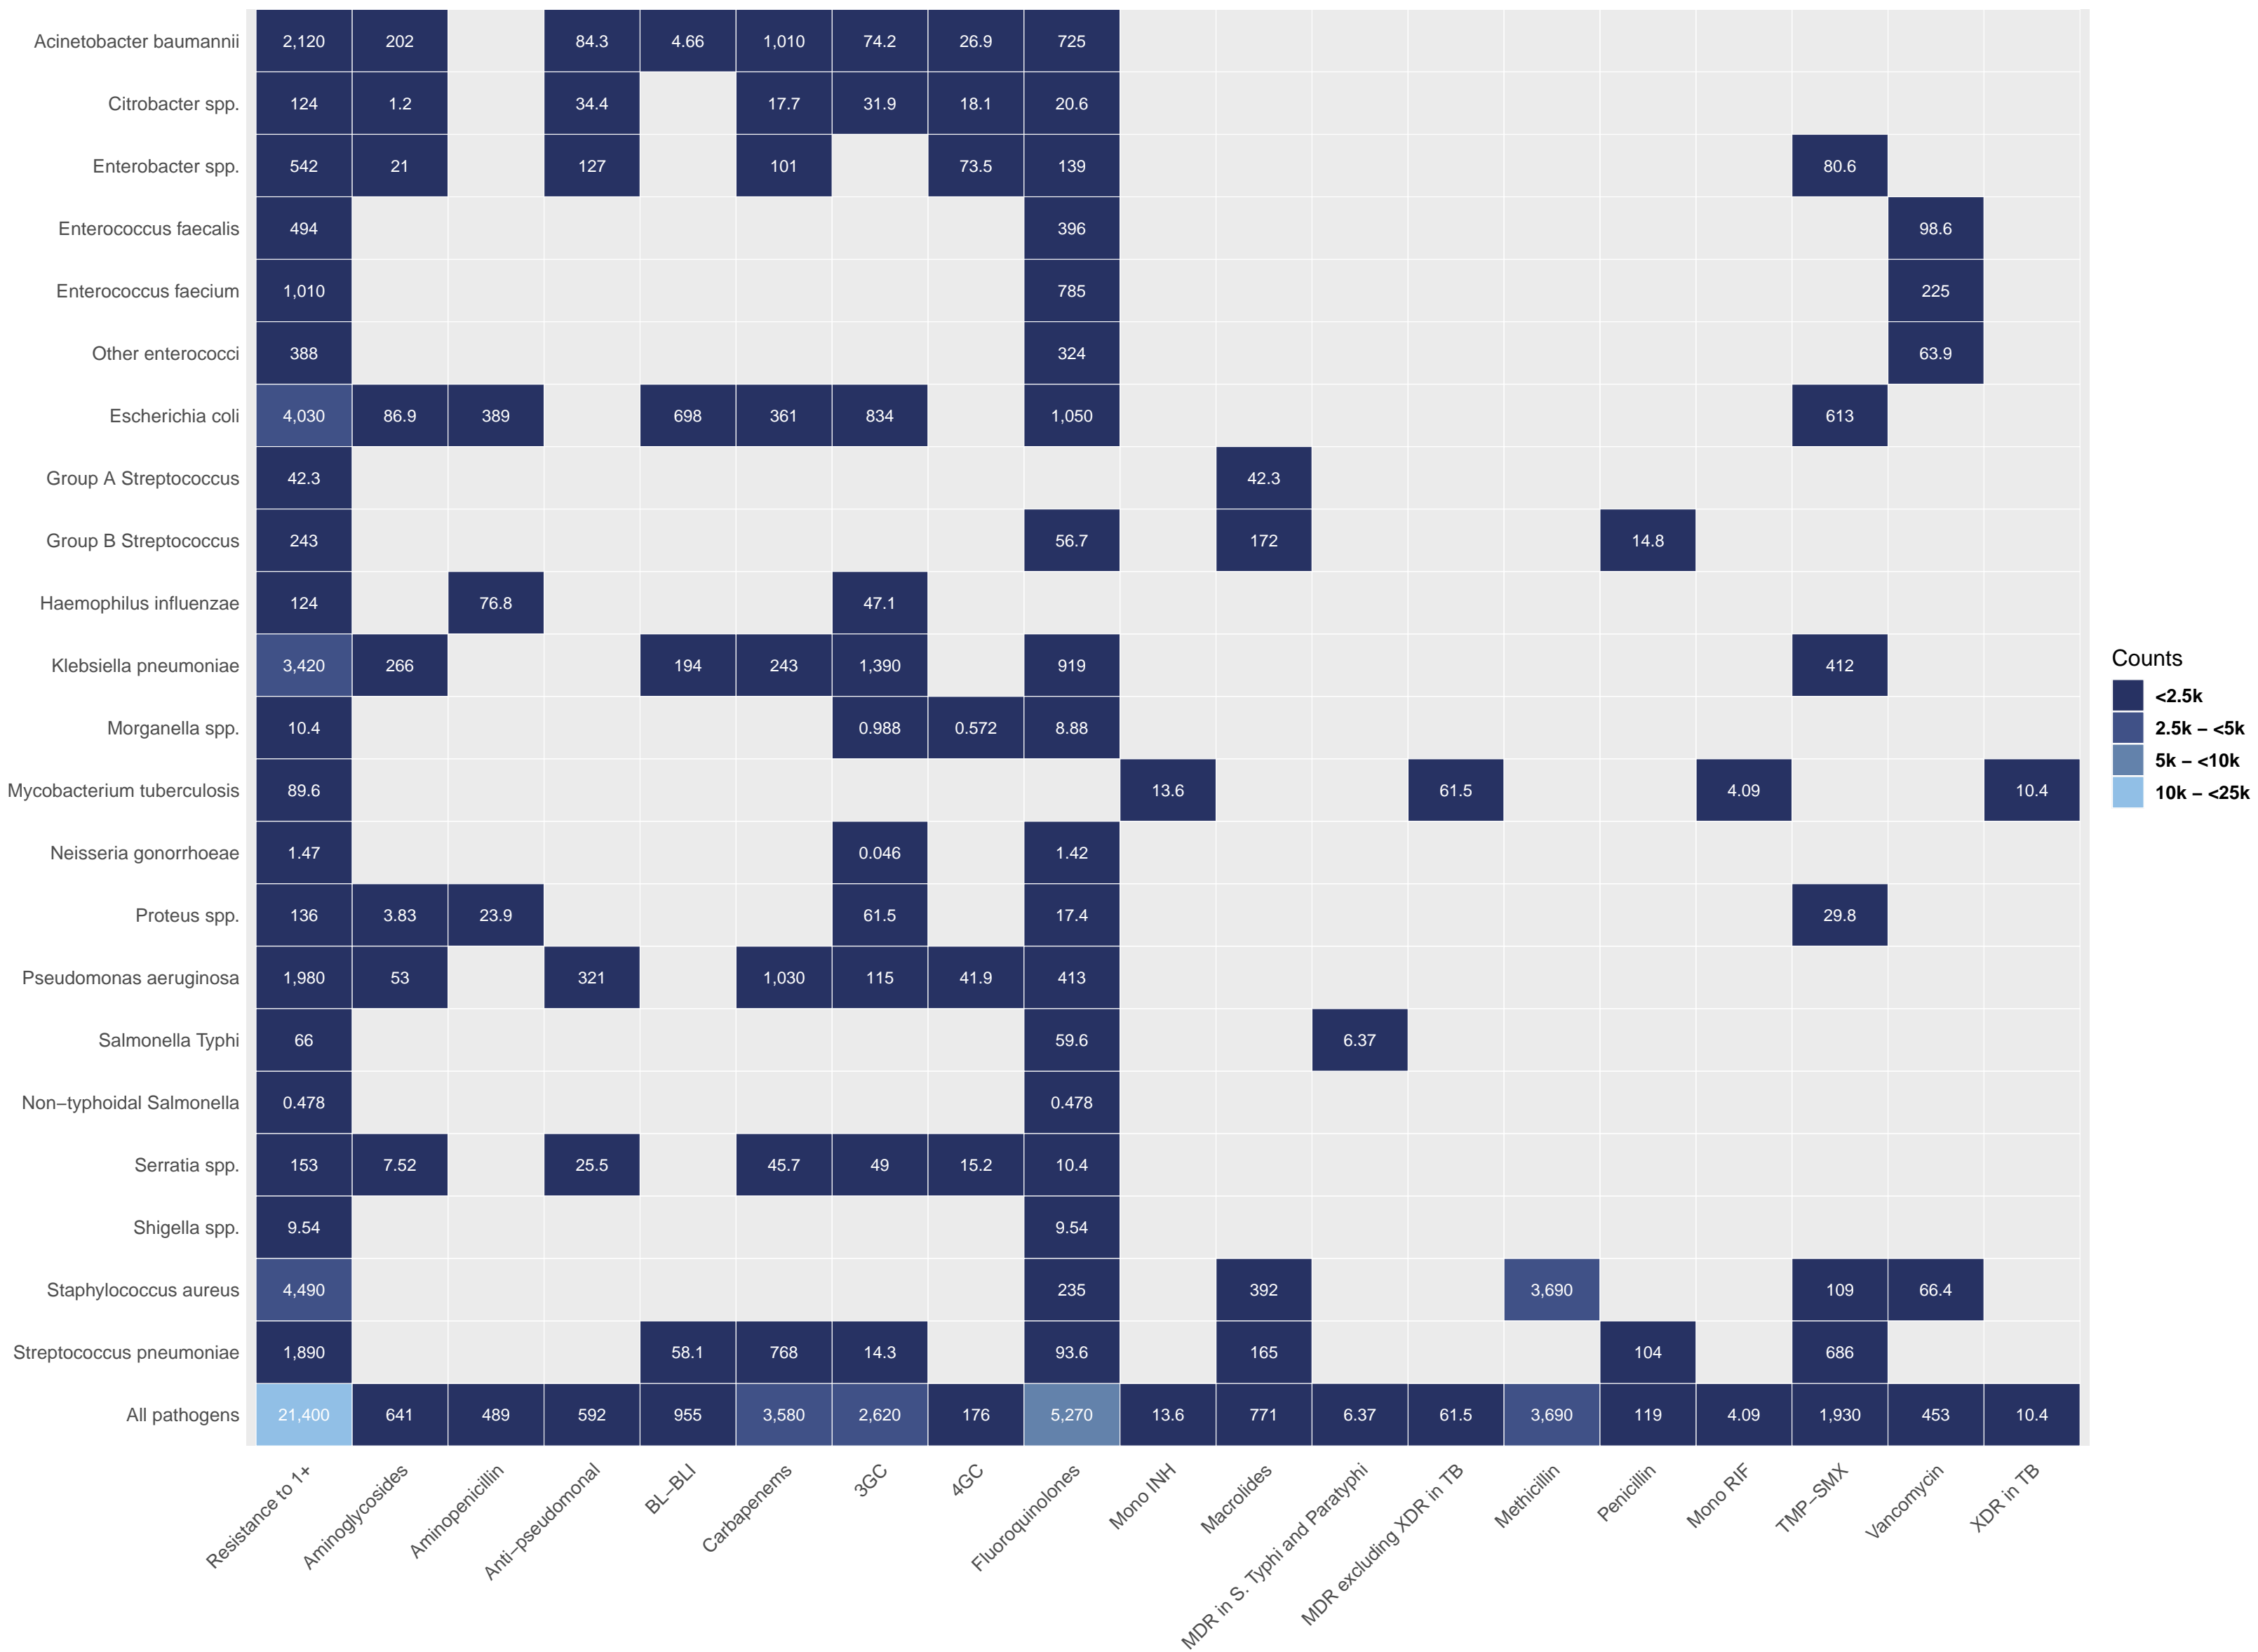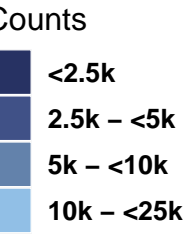

# Grenada

DALYs (count) associated with bacterial antimicrobial resistance by pathogen–drug combinations, 2019

|                            |                  |                 |                 |                  |        |             |       |       |                  |          |            |                               |                         |             |            |          |         |            |           |
|----------------------------|------------------|-----------------|-----------------|------------------|--------|-------------|-------|-------|------------------|----------|------------|-------------------------------|-------------------------|-------------|------------|----------|---------|------------|-----------|
| Acinetobacter baumannii    | 289              | 191             |                 | 276              | 222    | 230         | 233   | 241   | 258              |          |            |                               |                         |             |            |          |         |            |           |
| Citrobacter spp.           | 18.2             | 1.7             |                 | 4.26             |        | 2.86        | 12.6  | 8.79  | 7.31             |          |            |                               |                         |             |            |          |         |            |           |
| Enterobacter spp.          | 123              | 23.1            |                 | 46.4             |        | 29.5        |       | 63.3  | 57.1             |          |            |                               |                         |             |            |          | 81.6    |            |           |
| Enterococcus faecalis      | 39.5             |                 |                 |                  |        |             |       |       | 36.6             |          |            |                               |                         |             |            |          |         | 6.57       |           |
| Enterococcus faecium       | 74.7             |                 |                 |                  |        |             |       |       | 74.1             |          |            |                               |                         |             |            |          |         | 25.2       |           |
| Other enterococci          | 48.9             |                 |                 |                  |        |             |       |       | 48.9             |          |            |                               |                         |             |            |          |         | 3          |           |
| Escherichia coli           | 264              | 45.5            | 243             |                  | 213    | 21.7        | 148   |       | 173              |          |            |                               |                         |             |            |          | 179     |            |           |
| Group A Streptococcus      | 19               |                 |                 |                  |        |             |       |       |                  |          | 19         |                               |                         |             |            |          |         |            |           |
| Group B Streptococcus      | 36.8             |                 |                 |                  |        |             |       |       | 10.7             |          | 30.7       |                               |                         | 2.78        |            |          |         |            |           |
| Haemophilus influenzae     | 4.7              |                 | 2.82            |                  |        |             | 2.54  |       |                  |          |            |                               |                         |             |            |          |         |            |           |
| Klebsiella pneumoniae      | 218              | 74.1            |                 |                  | 182    | 20.5        | 150   |       | 123              |          |            |                               |                         |             |            |          | 173     |            |           |
| Morganella spp.            | 1.14             |                 |                 |                  |        |             | 0.217 | 0.221 | 1.05             |          |            |                               |                         |             |            |          |         |            |           |
| Mycobacterium tuberculosis | 0.625            |                 |                 |                  |        |             |       |       |                  | 0.144    |            |                               | 0.388                   |             |            | 0.037    |         |            | 0.056     |
| Neisseria gonorrhoeae      | 1.03             |                 |                 |                  |        |             | 0.007 |       | 1.02             |          |            |                               |                         |             |            |          |         |            |           |
| Proteus spp.               | 32.6             | 2.36            | 28.7            |                  |        |             | 6.7   |       | 12.9             |          |            |                               |                         |             |            |          | 22.1    |            |           |
| Pseudomonas aeruginosa     | 143              | 76.2            |                 | 54.8             |        | 91.1        | 61.9  | 46.2  | 82.7             |          |            |                               |                         |             |            |          |         |            |           |
| Salmonella Typhi           | 3.84             |                 |                 |                  |        |             |       |       | 3.04             |          |            | 0.958                         |                         |             |            |          |         |            |           |
| Non-typhoidal Salmonella   | 0.47             |                 |                 |                  |        |             |       |       | 0.47             |          |            |                               |                         |             |            |          |         |            |           |
| Serratia spp.              | 22.4             | 6.84            |                 | 5.94             |        | 5.64        | 13.9  | 6.48  | 9.71             |          |            |                               |                         |             |            |          |         |            |           |
| Shigella spp.              | 0.11             |                 |                 |                  |        |             |       |       | 0.11             |          |            |                               |                         |             |            |          |         |            |           |
| Staphylococcus aureus      | 267              |                 |                 |                  |        |             |       |       | 78.9             |          | 172        |                               | 230                     |             |            |          | 60      | 4.9        |           |
| Streptococcus pneumoniae   | 252              |                 |                 |                  | 52.6   | 68.8        | 74.2  |       | 19.3             |          | 155        |                               |                         | 111         |            |          | 181     |            |           |
| All pathogens              | 1,860            | 421             | 274             | 388              | 669    | 470         | 703   | 366   | 997              | 0.144    | 377        | 0.958                         | 0.388                   | 230         | 113        | 0.037    | 697     | 39.6       | 0.056     |
|                            | Resistance to 1+ | Aminoglycosides | Aminopenicillin | Anti-pseudomonal | BL-BLI | Carbapenems | 3GC   | 4GC   | Fluoroquinolones | Mono INH | Macrolides | MDR in S. Typhi and Paratyphi | MDR excluding XDR in TB | Methicillin | Penicillin | Mono RIF | TMP-SMX | Vancomycin | XDR in TB |

Counts  
  <2.5k

# Grenada

DALYs (count) *attributable to bacterial antimicrobial resistance by pathogen–drug combinations, 2019*

|                            |                  |                 |                 |                  |        |             |       |       |                  |          |            |                               |                         |             |            |          |         |            |           |
|----------------------------|------------------|-----------------|-----------------|------------------|--------|-------------|-------|-------|------------------|----------|------------|-------------------------------|-------------------------|-------------|------------|----------|---------|------------|-----------|
| Acinetobacter baumannii    | 90.6             | 8.11            |                 | 10.2             | 0.289  | 37.4        | 1.91  | 0.195 | 32.5             |          |            |                               |                         |             |            |          |         |            |           |
| Citrobacter spp.           | 5.15             | 0.088           |                 | 0.847            |        | 0.691       | 1.32  | 1.04  | 1.16             |          |            |                               |                         |             |            |          |         |            |           |
| Enterobacter spp.          | 27.8             | 1.38            |                 | 4.54             |        | 6.85        |       | 3.56  | 6.61             |          |            |                               |                         |             |            |          | 4.9     |            |           |
| Enterococcus faecalis      | 11               |                 |                 |                  |        |             |       |       | 8.92             |          |            |                               |                         |             |            |          |         | 2.06       |           |
| Enterococcus faecium       | 19.6             |                 |                 |                  |        |             |       |       | 13.8             |          |            |                               |                         |             |            |          |         | 5.82       |           |
| Other enterococci          | 9.98             |                 |                 |                  |        |             |       |       | 9.43             |          |            |                               |                         |             |            |          |         | 0.548      |           |
| Escherichia coli           | 67.1             | 2.64            | 2.06            |                  | 9.03   | 4.64        | 19.9  |       | 18.6             |          |            |                               |                         |             |            |          | 10.2    |            |           |
| Group A Streptococcus      | 1.82             |                 |                 |                  |        |             |       |       |                  |          | 1.82       |                               |                         |             |            |          |         |            |           |
| Group B Streptococcus      | 5.38             |                 |                 |                  |        |             |       |       | 1.84             |          | 3.04       |                               |                         | 0.505       |            |          |         |            |           |
| Haemophilus influenzae     | 1.15             |                 | 0.405           |                  |        |             | 0.746 |       |                  |          |            |                               |                         |             |            |          |         |            |           |
| Klebsiella pneumoniae      | 55.1             | 5.76            |                 |                  | 5.26   | 5.36        | 20.9  |       | 8.51             |          |            |                               |                         |             |            |          | 9.29    |            |           |
| Morganella spp.            | 0.254            |                 |                 |                  |        |             | 0.023 | 0.036 | 0.194            |          |            |                               |                         |             |            |          |         |            |           |
| Mycobacterium tuberculosis | 0.222            |                 |                 |                  |        |             |       |       |                  | 0.017    |            |                               | 0.168                   |             |            | 0.008    |         |            | 0.029     |
| Neisseria gonorrhoeae      | 0.101            |                 |                 |                  |        |             | 0.002 |       | 0.099            |          |            |                               |                         |             |            |          |         |            |           |
| Proteus spp.               | 4.07             | 0.135           | 0.631           |                  |        |             | 1.52  |       | 0.905            |          |            |                               |                         |             |            |          | 0.879   |            |           |
| Pseudomonas aeruginosa     | 32.7             | 2.07            |                 | 2.84             |        | 15.5        | 2.66  | 0.751 | 8.87             |          |            |                               |                         |             |            |          |         |            |           |
| Salmonella Typhi           | 0.736            |                 |                 |                  |        |             |       |       | 0.617            |          |            | 0.12                          |                         |             |            |          |         |            |           |
| Non-typhoidal Salmonella   | 0.084            |                 |                 |                  |        |             |       |       | 0.084            |          |            |                               |                         |             |            |          |         |            |           |
| Serratia spp.              | 5.61             | 0.387           |                 | 1.06             |        | 1.45        | 1.14  | 0.458 | 1.11             |          |            |                               |                         |             |            |          |         |            |           |
| Shigella spp.              | 0.017            |                 |                 |                  |        |             |       |       | 0.017            |          |            |                               |                         |             |            |          |         |            |           |
| Staphylococcus aureus      | 77.8             |                 |                 |                  |        |             |       |       | 3.51             |          | 6.23       |                               |                         | 61.8        |            |          | 5.04    | 1.17       |           |
| Streptococcus pneumoniae   | 51.5             |                 |                 |                  | 0.874  | 14.8        | 5.65  |       | 2.23             |          | 6.23       |                               |                         | 6.18        |            |          | 15.6    |            |           |
| All pathogens              | 468              | 20.6            | 3.09            | 19.5             | 15.4   | 86.7        | 55.8  | 6.04  | 119              | 0.017    | 17.3       | 0.12                          | 0.168                   | 61.8        | 6.68       | 0.008    | 45.9    | 9.6        | 0.029     |
|                            | Resistance to 1+ | Aminoglycosides | Aminopenicillin | Anti-pseudomonal | BL-BLI | Carbapenems | 3GC   | 4GC   | Fluoroquinolones | Mono INH | Macrolides | MDR in S. Typhi and Paratyphi | MDR excluding XDR in TB | Methicillin | Penicillin | Mono RIF | TMP-SMX | Vancomycin | XDR in TB |

Counts  
  <2.5k



# Guatemala

DALYs (count) associated with bacterial antimicrobial resistance by pathogen–drug combinations, 2019

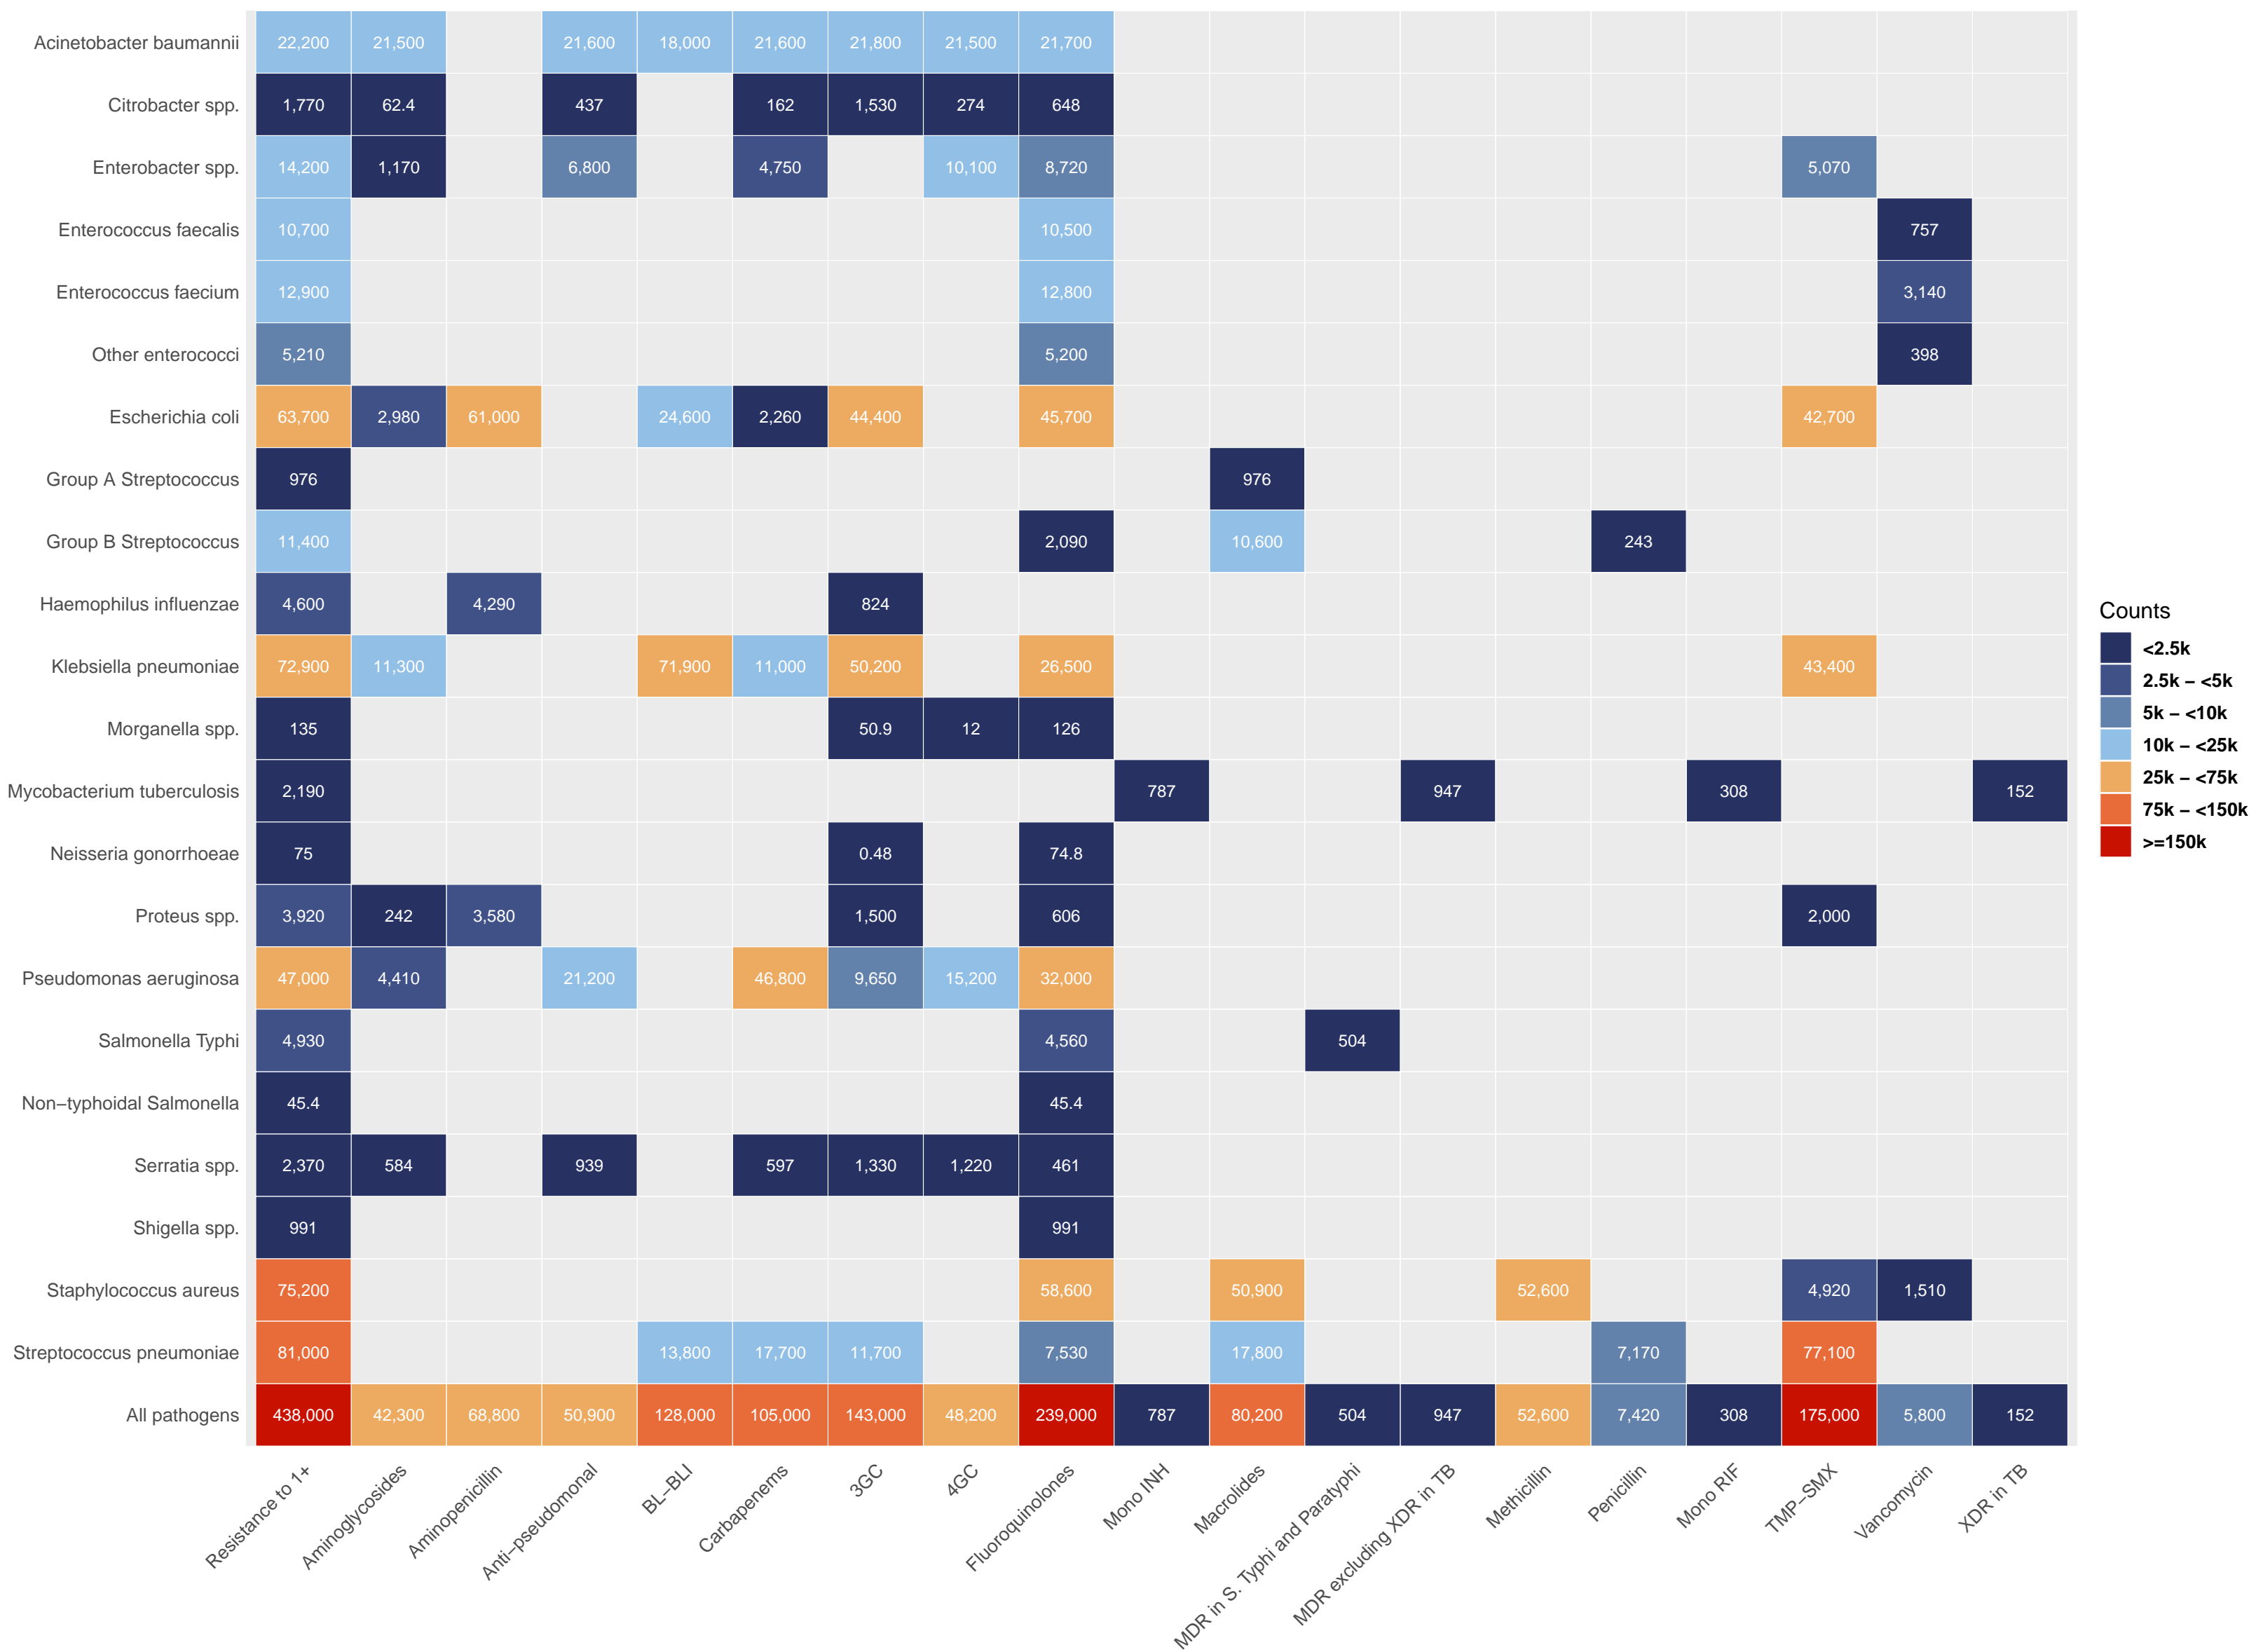

# Guatemala

DALYs (count) attributable to bacterial antimicrobial resistance by pathogen–drug combinations, 2019

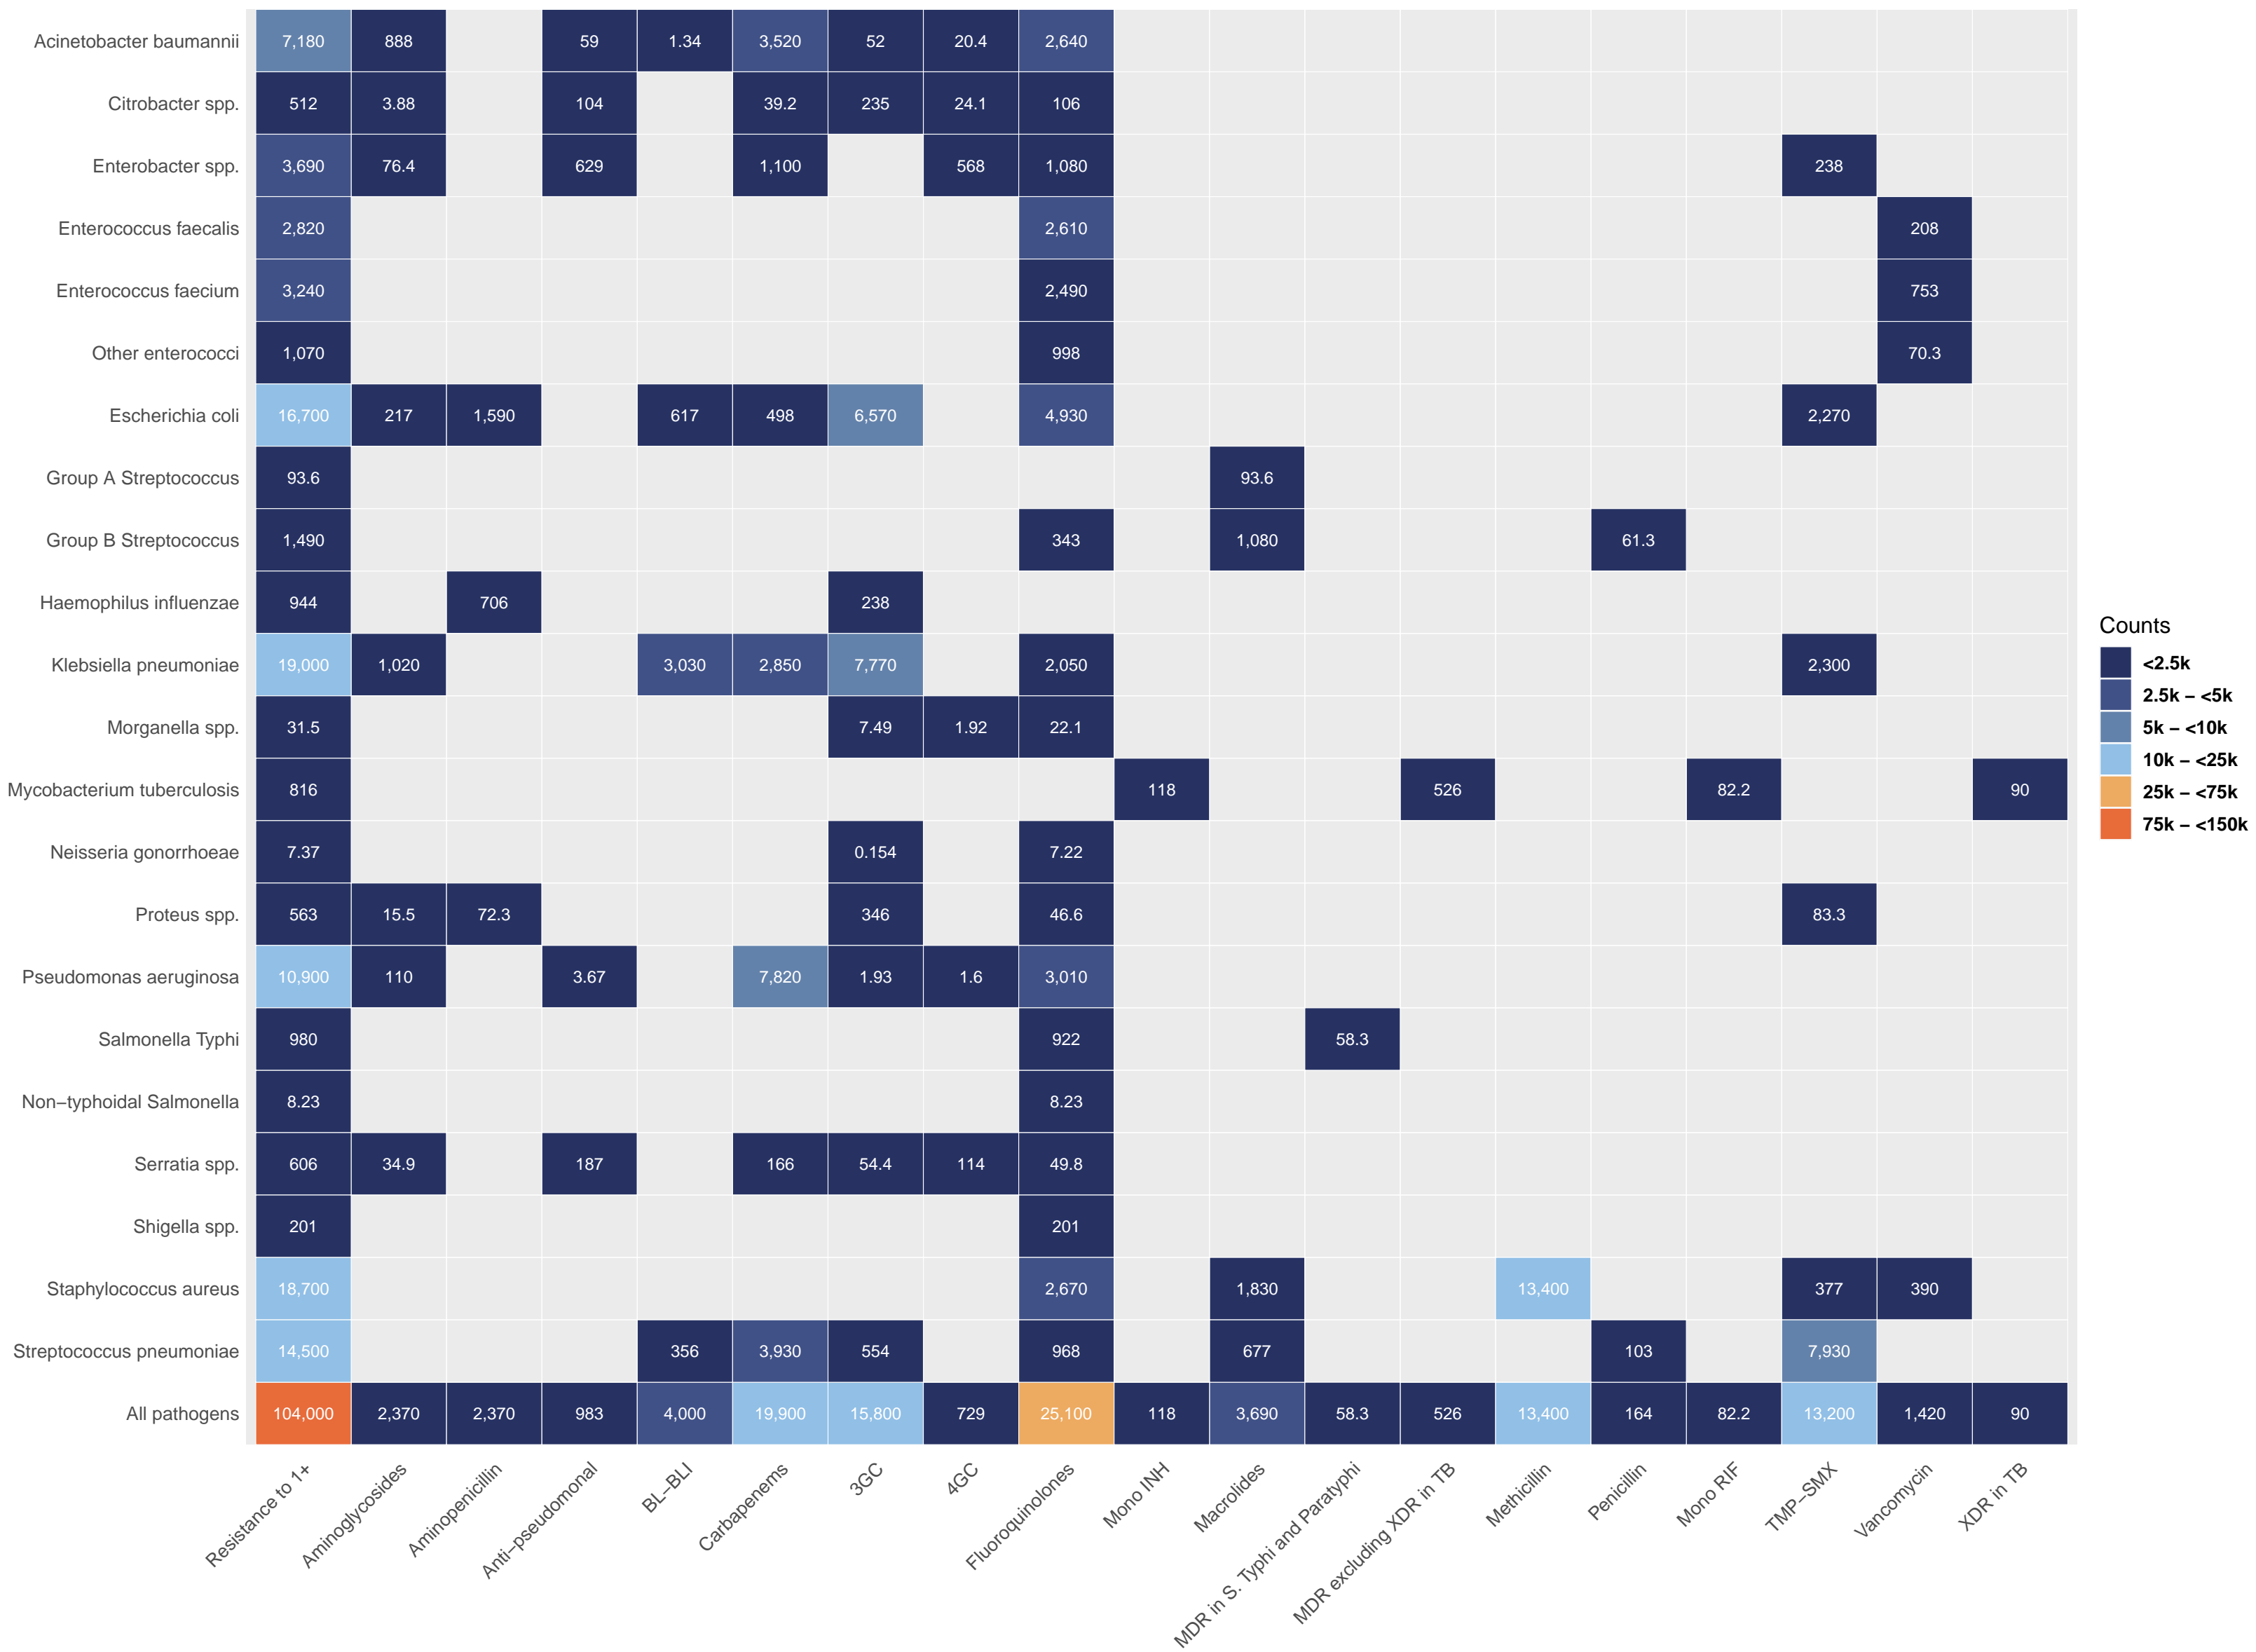

# Guyana

DALYs (count) associated with bacterial antimicrobial resistance by pathogen–drug combinations, 2019

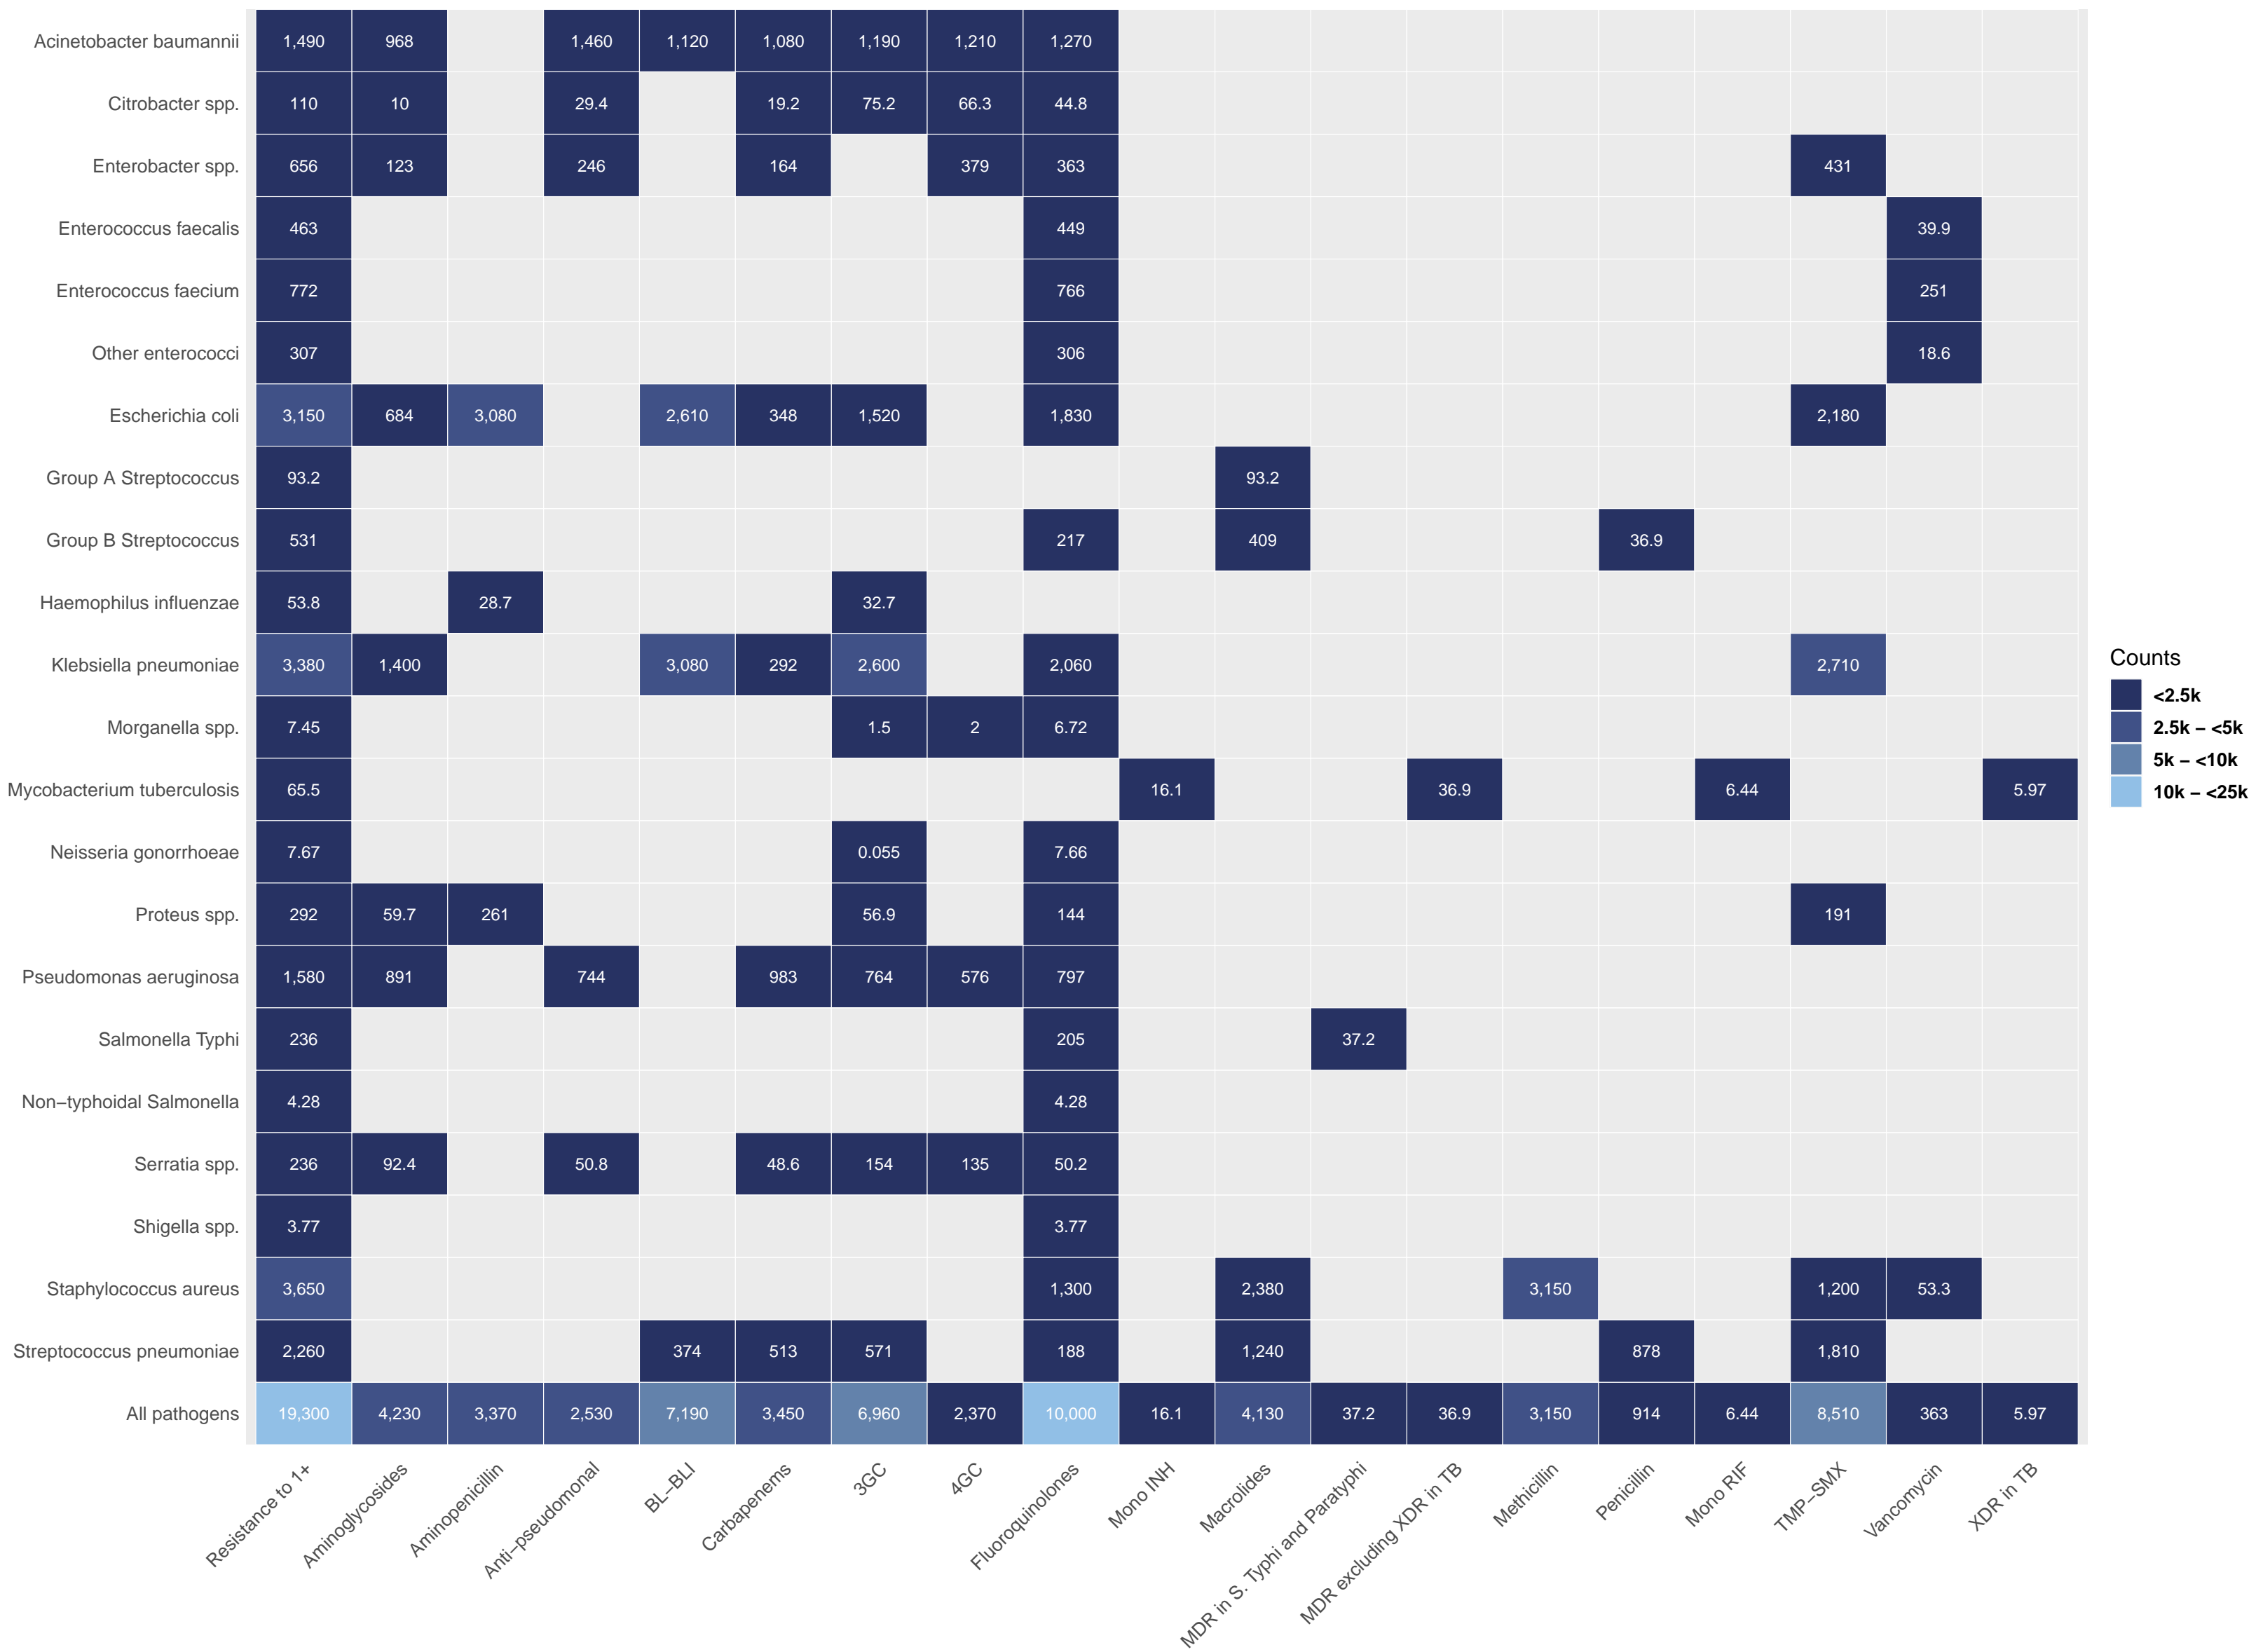

# Guyana

DALYs (count) *attributable to bacterial antimicrobial resistance by pathogen–drug combinations, 2019*

|                            |                  |                 |                 |                  |        |             |       |       |                  |          |            |                               |                         |             |            |          |         |            |           |
|----------------------------|------------------|-----------------|-----------------|------------------|--------|-------------|-------|-------|------------------|----------|------------|-------------------------------|-------------------------|-------------|------------|----------|---------|------------|-----------|
| Acinetobacter baumannii    | 463              | 41.5            |                 | 81.2             | 0.444  | 175         | 4.21  | 0.238 | 160              |          |            |                               |                         |             |            |          |         |            |           |
| Citrobacter spp.           | 31.3             | 0.497           |                 | 5.43             |        | 4.54        | 6.2   | 7.81  | 6.78             |          |            |                               |                         |             |            |          |         |            |           |
| Enterobacter spp.          | 154              | 6.97            |                 | 22               |        | 36.2        |       | 21.9  | 42.7             |          |            |                               |                         |             |            |          | 24.3    |            |           |
| Enterococcus faecalis      | 123              |                 |                 |                  |        |             |       |       | 111              |          |            |                               |                         |             |            |          |         | 11.9       |           |
| Enterococcus faecium       | 202              |                 |                 |                  |        |             |       |       | 144              |          |            |                               |                         |             |            |          |         | 58.1       |           |
| Other enterococci          | 62.5             |                 |                 |                  |        |             |       |       | 59.1             |          |            |                               |                         |             |            |          |         | 3.37       |           |
| Escherichia coli           | 784              | 40.8            | 36.3            |                  | 128    | 74.6        | 192   |       | 188              |          |            |                               |                         |             |            |          | 125     |            |           |
| Group A Streptococcus      | 8.94             |                 |                 |                  |        |             |       |       |                  |          | 8.94       |                               |                         |             |            |          |         |            |           |
| Group B Streptococcus      | 83.5             |                 |                 |                  |        |             |       |       | 37.7             |          | 39.3       |                               |                         | 6.5         |            |          |         |            |           |
| Haemophilus influenzae     | 13.6             |                 | 3.97            |                  |        |             | 9.62  |       |                  |          |            |                               |                         |             |            |          |         |            |           |
| Klebsiella pneumoniae      | 886              | 105             |                 |                  | 73.1   | 74.5        | 362   |       | 138              |          |            |                               |                         |             |            |          | 133     |            |           |
| Morganella spp.            | 1.67             |                 |                 |                  |        |             | 0.135 | 0.32  | 1.22             |          |            |                               |                         |             |            |          |         |            |           |
| Mycobacterium tuberculosis | 28.5             |                 |                 |                  |        |             |       |       |                  | 2.42     |            |                               | 20.8                    |             |            | 1.73     |         |            | 3.55      |
| Neisseria gonorrhoeae      | 0.757            |                 |                 |                  |        |             | 0.015 |       | 0.741            |          |            |                               |                         |             |            |          |         |            |           |
| Proteus spp.               | 37.5             | 2.67            | 5.57            |                  |        |             | 12.3  |       | 10.1             |          |            |                               |                         |             |            |          | 6.92    |            |           |
| Pseudomonas aeruginosa     | 367              | 24.6            |                 | 48.7             |        | 173         | 29    | 8.84  | 83               |          |            |                               |                         |             |            |          |         |            |           |
| Salmonella Typhi           | 46.1             |                 |                 |                  |        |             |       |       | 41.5             |          |            | 4.61                          |                         |             |            |          |         |            |           |
| Non-typhoidal Salmonella   | 0.783            |                 |                 |                  |        |             |       |       | 0.783            |          |            |                               |                         |             |            |          |         |            |           |
| Serratia spp.              | 59.4             | 5.4             |                 | 9.81             |        | 12.7        | 11.5  | 15    | 5.14             |          |            |                               |                         |             |            |          |         |            |           |
| Shigella spp.              | 0.733            |                 |                 |                  |        |             |       |       | 0.733            |          |            |                               |                         |             |            |          |         |            |           |
| Staphylococcus aureus      | 1,070            |                 |                 |                  |        |             |       |       | 54               |          | 81.8       |                               |                         | 818         |            |          | 99.7    | 11.6       |           |
| Streptococcus pneumoniae   | 443              |                 |                 |                  | 6.13   | 109         | 44.3  |       | 22.3             |          | 49         |                               |                         | 50.1        |            |          | 162     |            |           |
| All pathogens              | 4,860            | 227             | 45.8            | 167              | 207    | 659         | 671   | 54.1  | 1,110            | 2.42     | 179        | 4.61                          | 20.8                    | 818         | 56.6       | 1.73     | 551     | 85         | 3.55      |
|                            | Resistance to 1+ | Aminoglycosides | Aminopenicillin | Anti-pseudomonal | BL-BLI | Carbapenems | 3GC   | 4GC   | Fluoroquinolones | Mono INH | Macrolides | MDR in S. Typhi and Paratyphi | MDR excluding XDR in TB | Methicillin | Penicillin | Mono RIF | TMP-SMX | Vancomycin | XDR in TB |

Counts

<2.5k

2.5k – <5k

# Haiti

DALYs (count) associated with bacterial antimicrobial resistance by pathogen–drug combinations, 2019

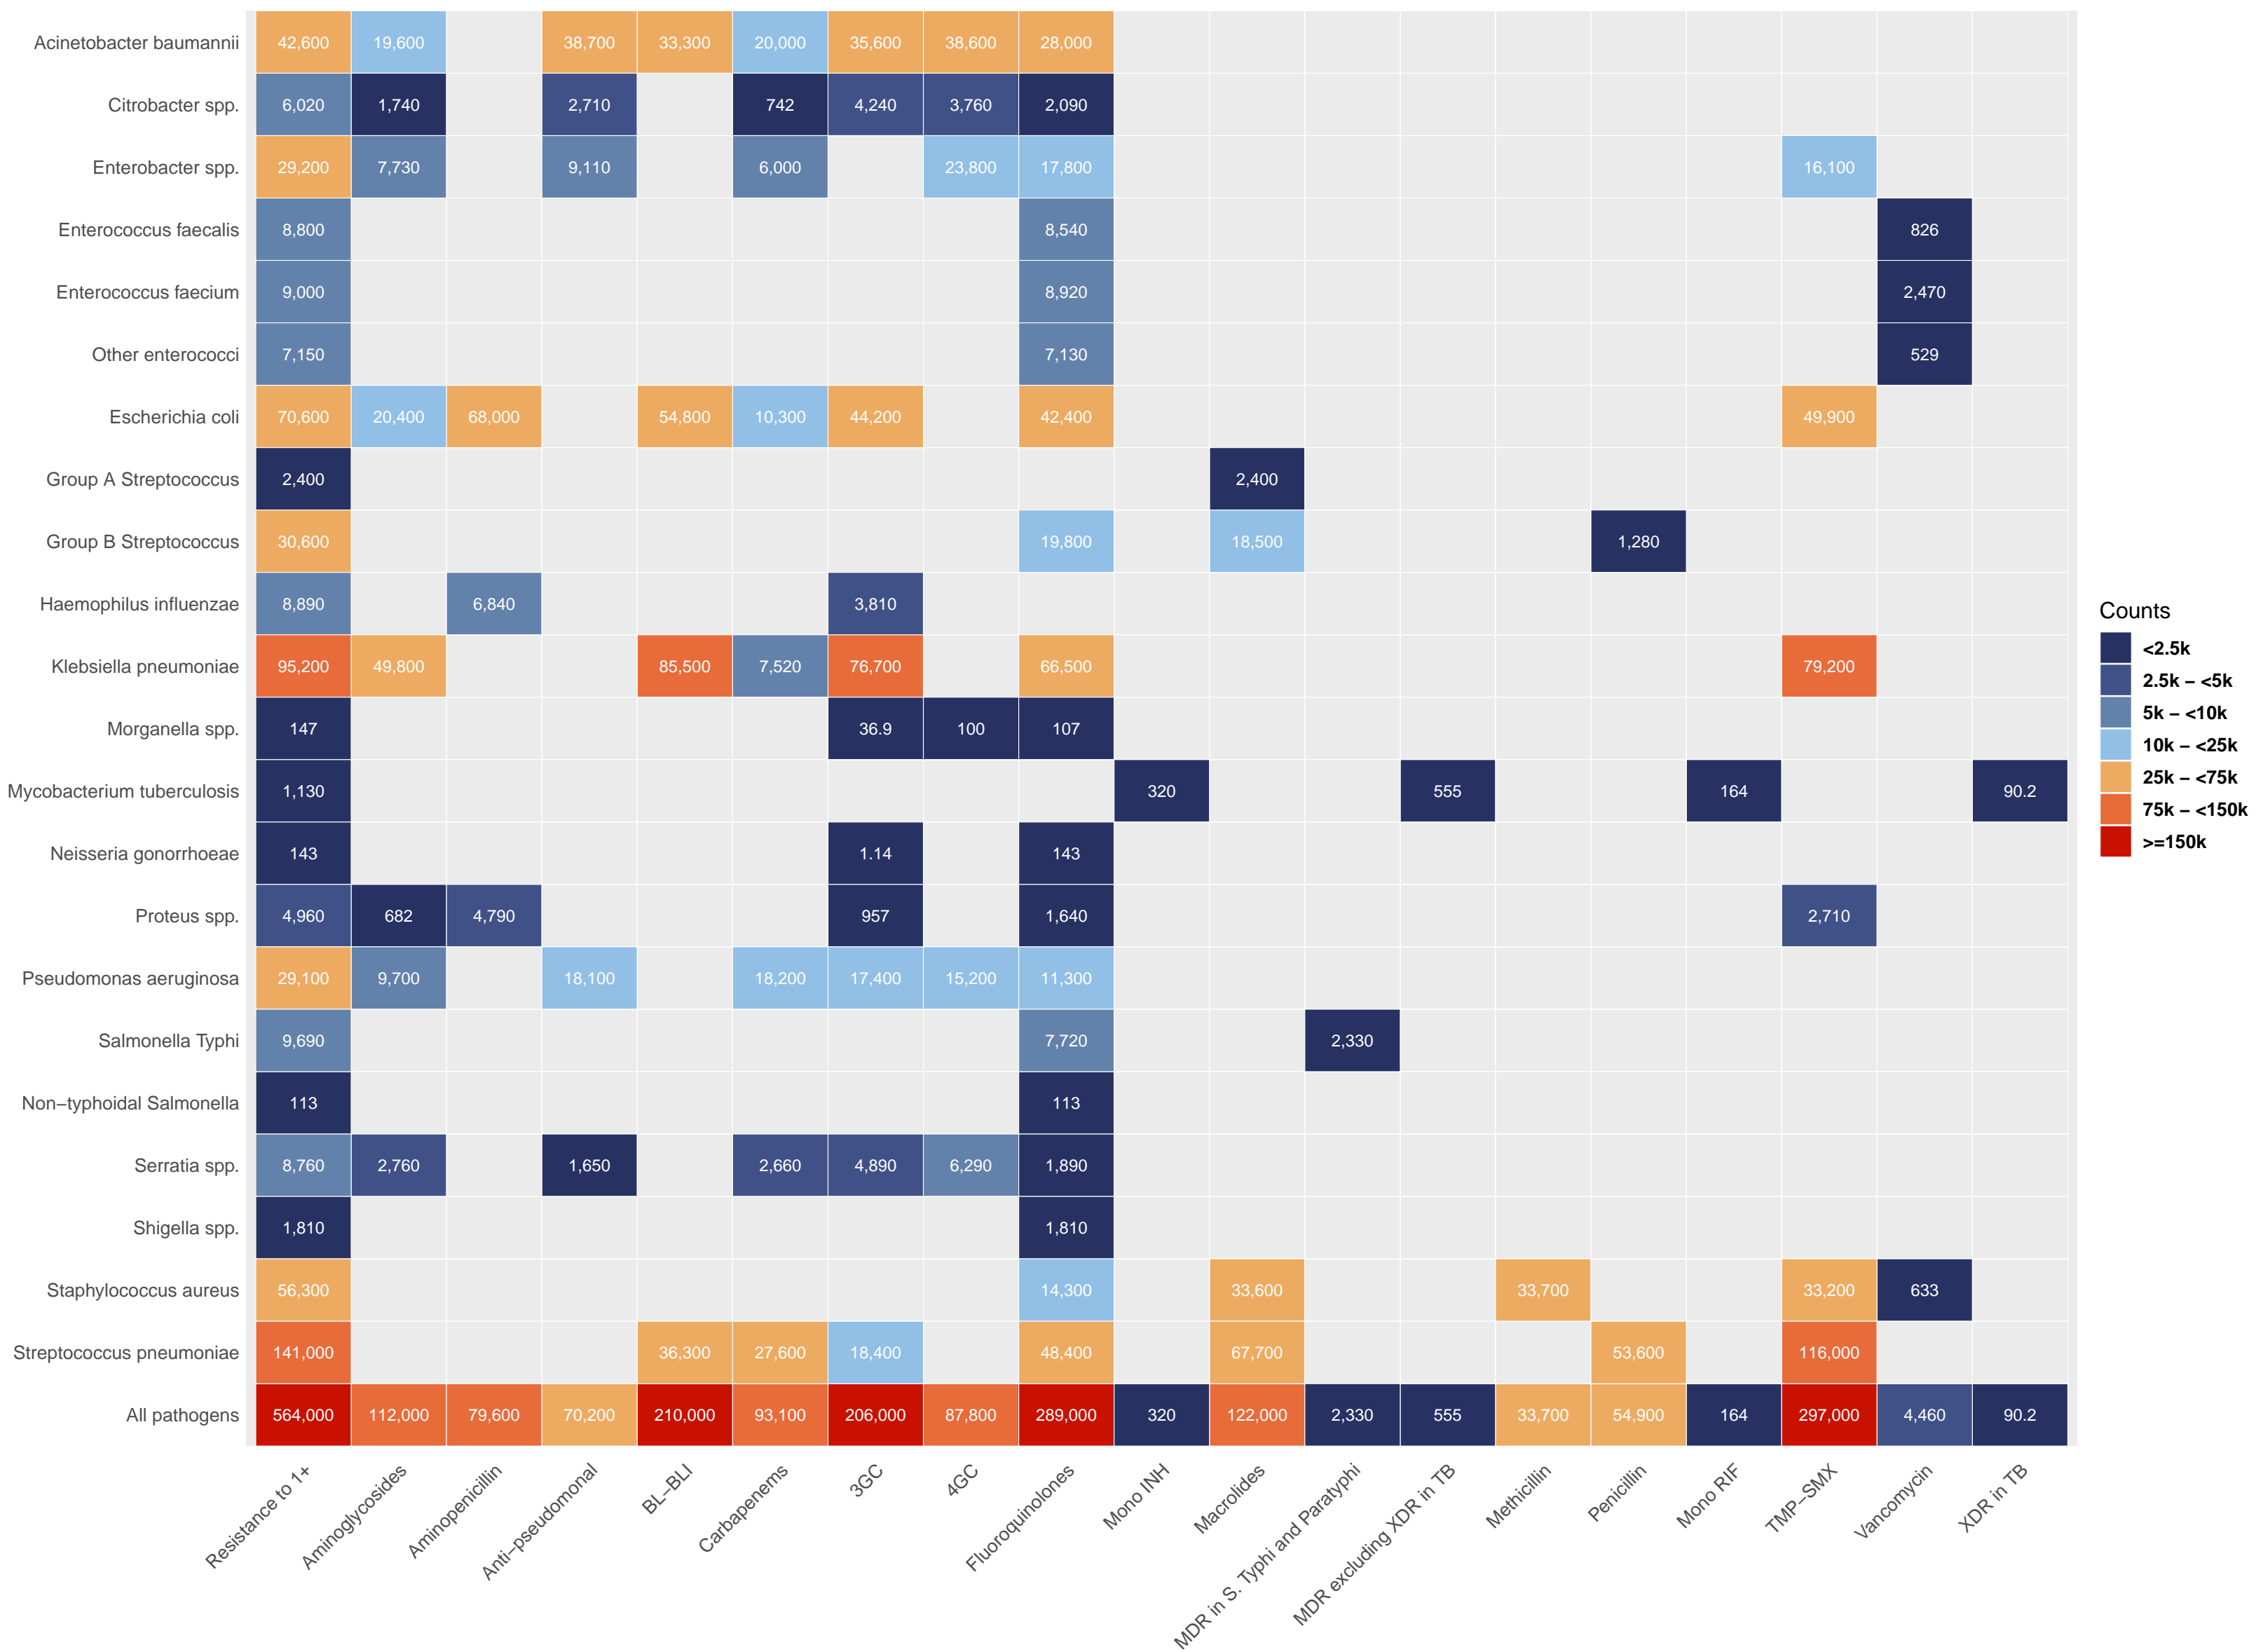

# Haiti

DALYs (count) attributable to bacterial antimicrobial resistance by pathogen–drug combinations, 2019

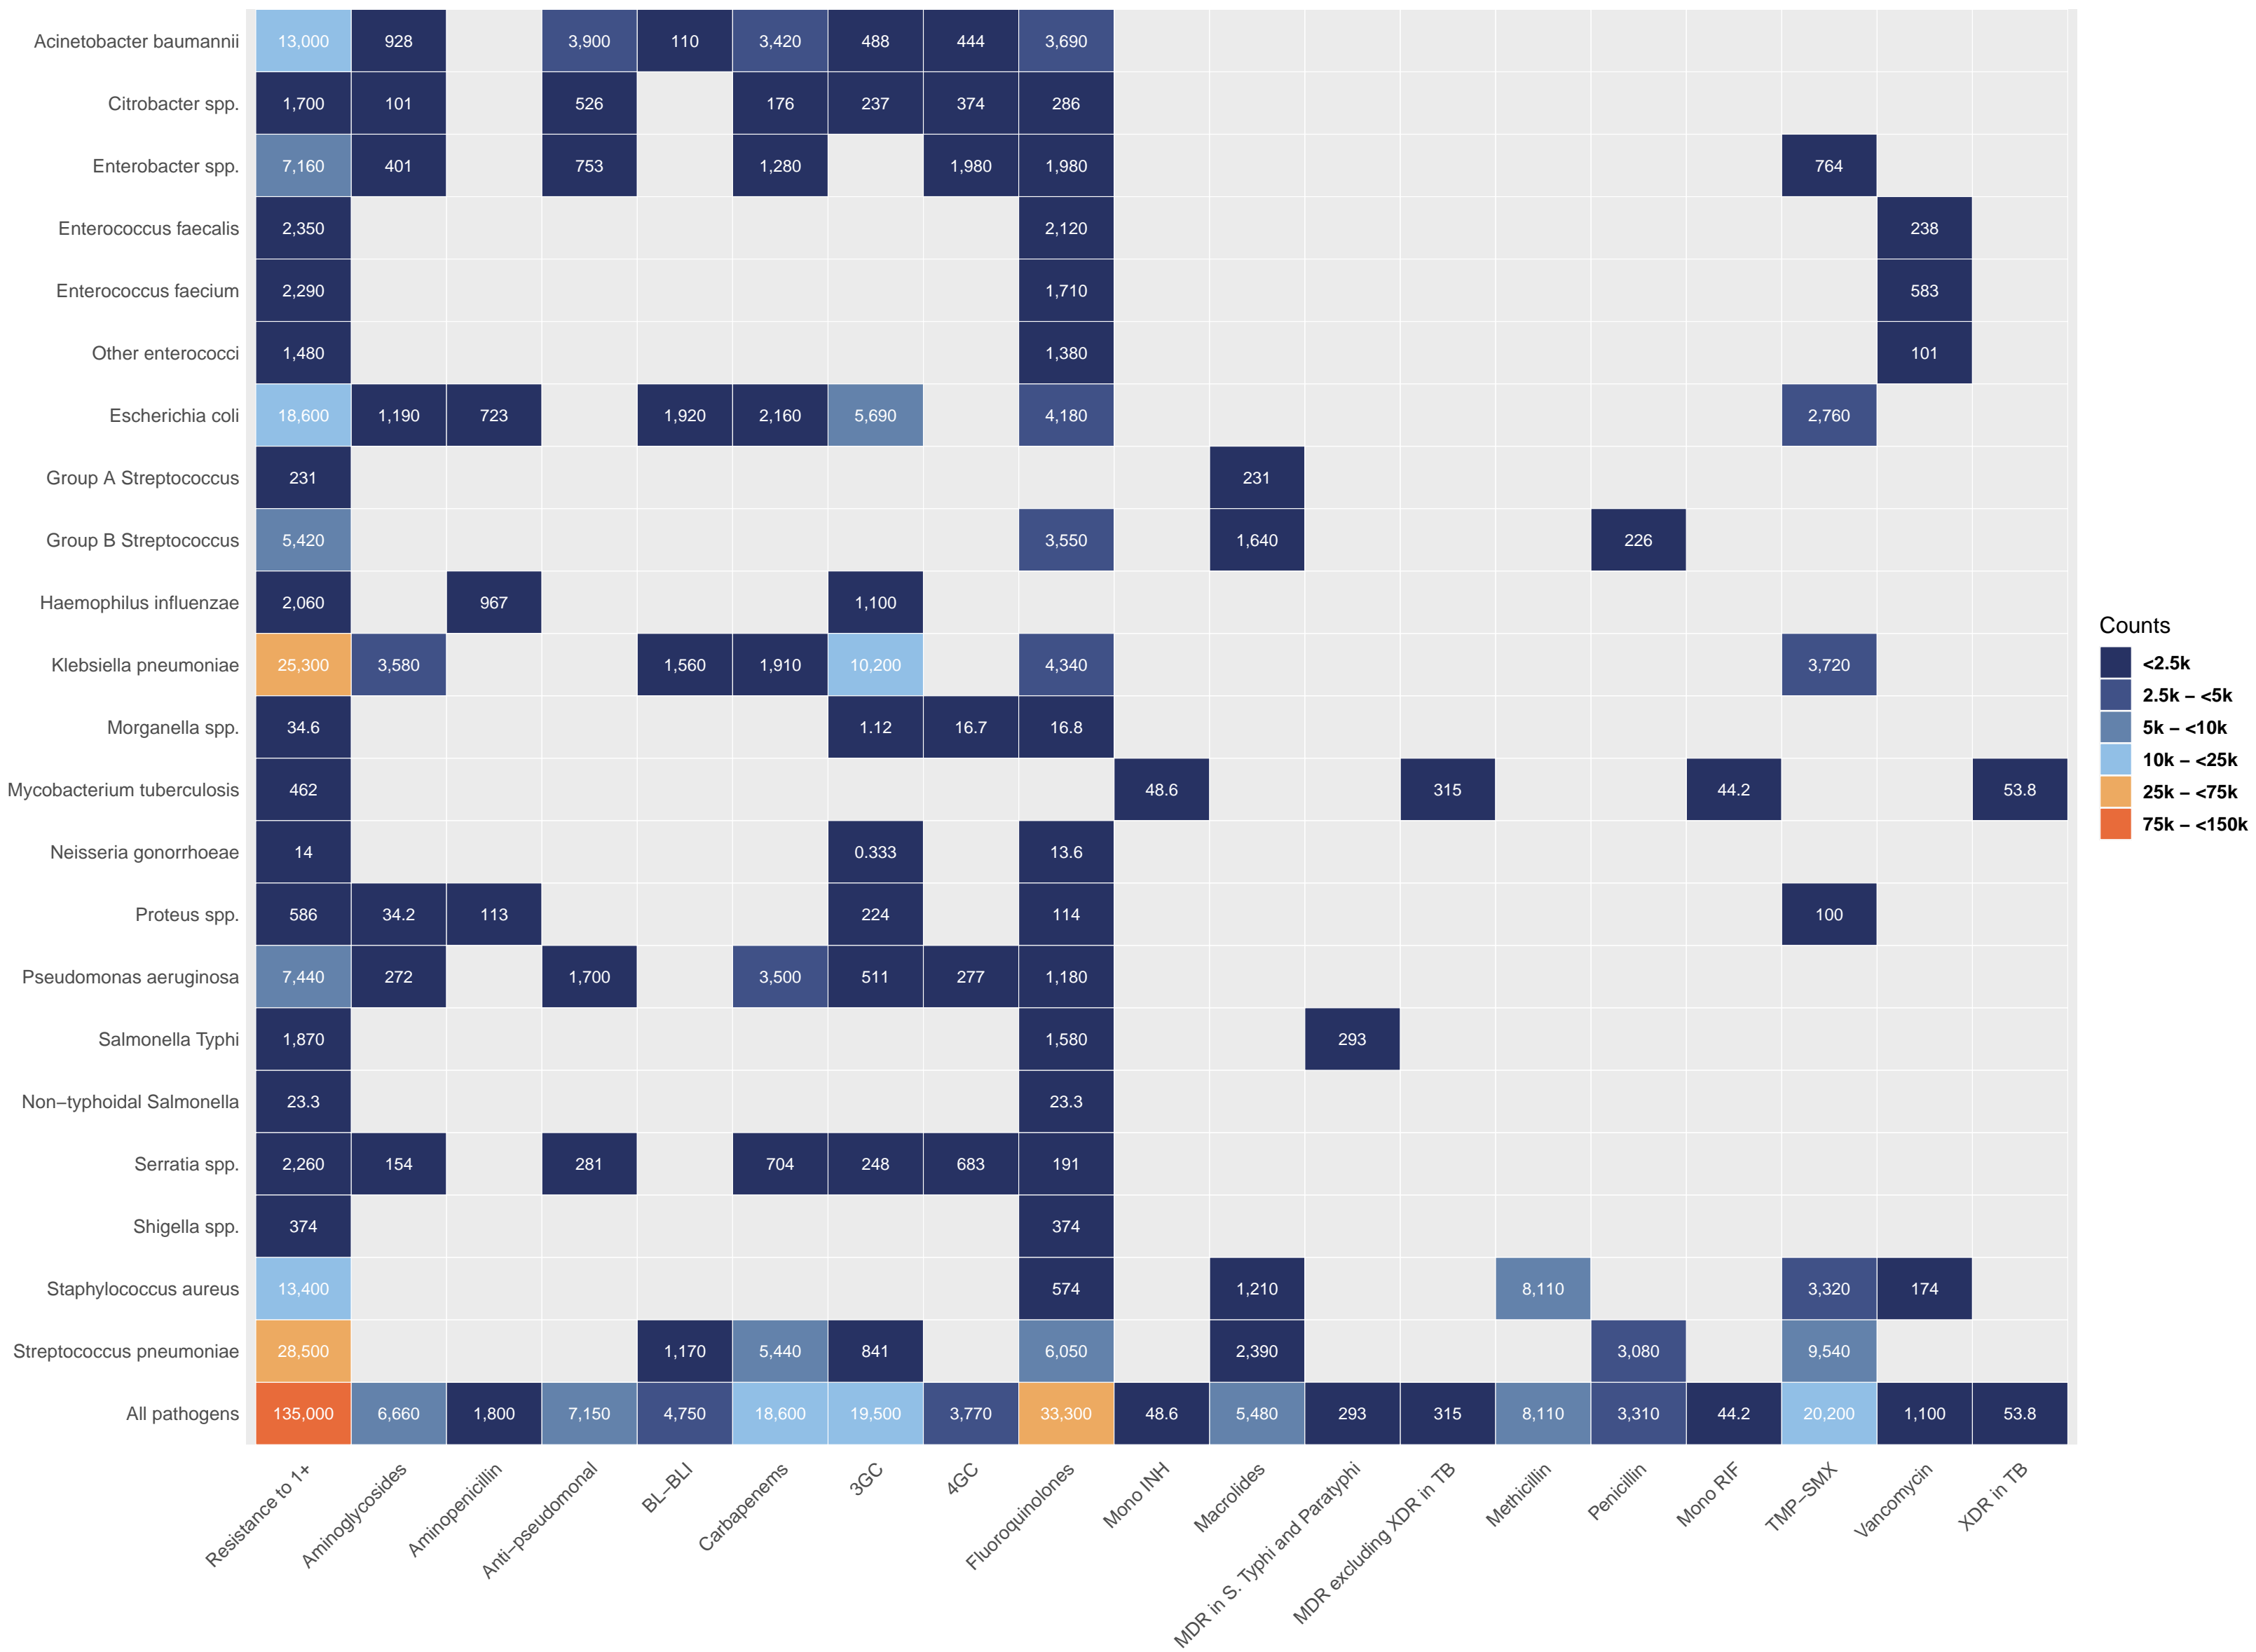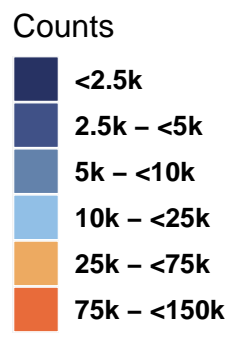

# Honduras

DALYs (count) associated with bacterial antimicrobial resistance by pathogen–drug combinations, 2019

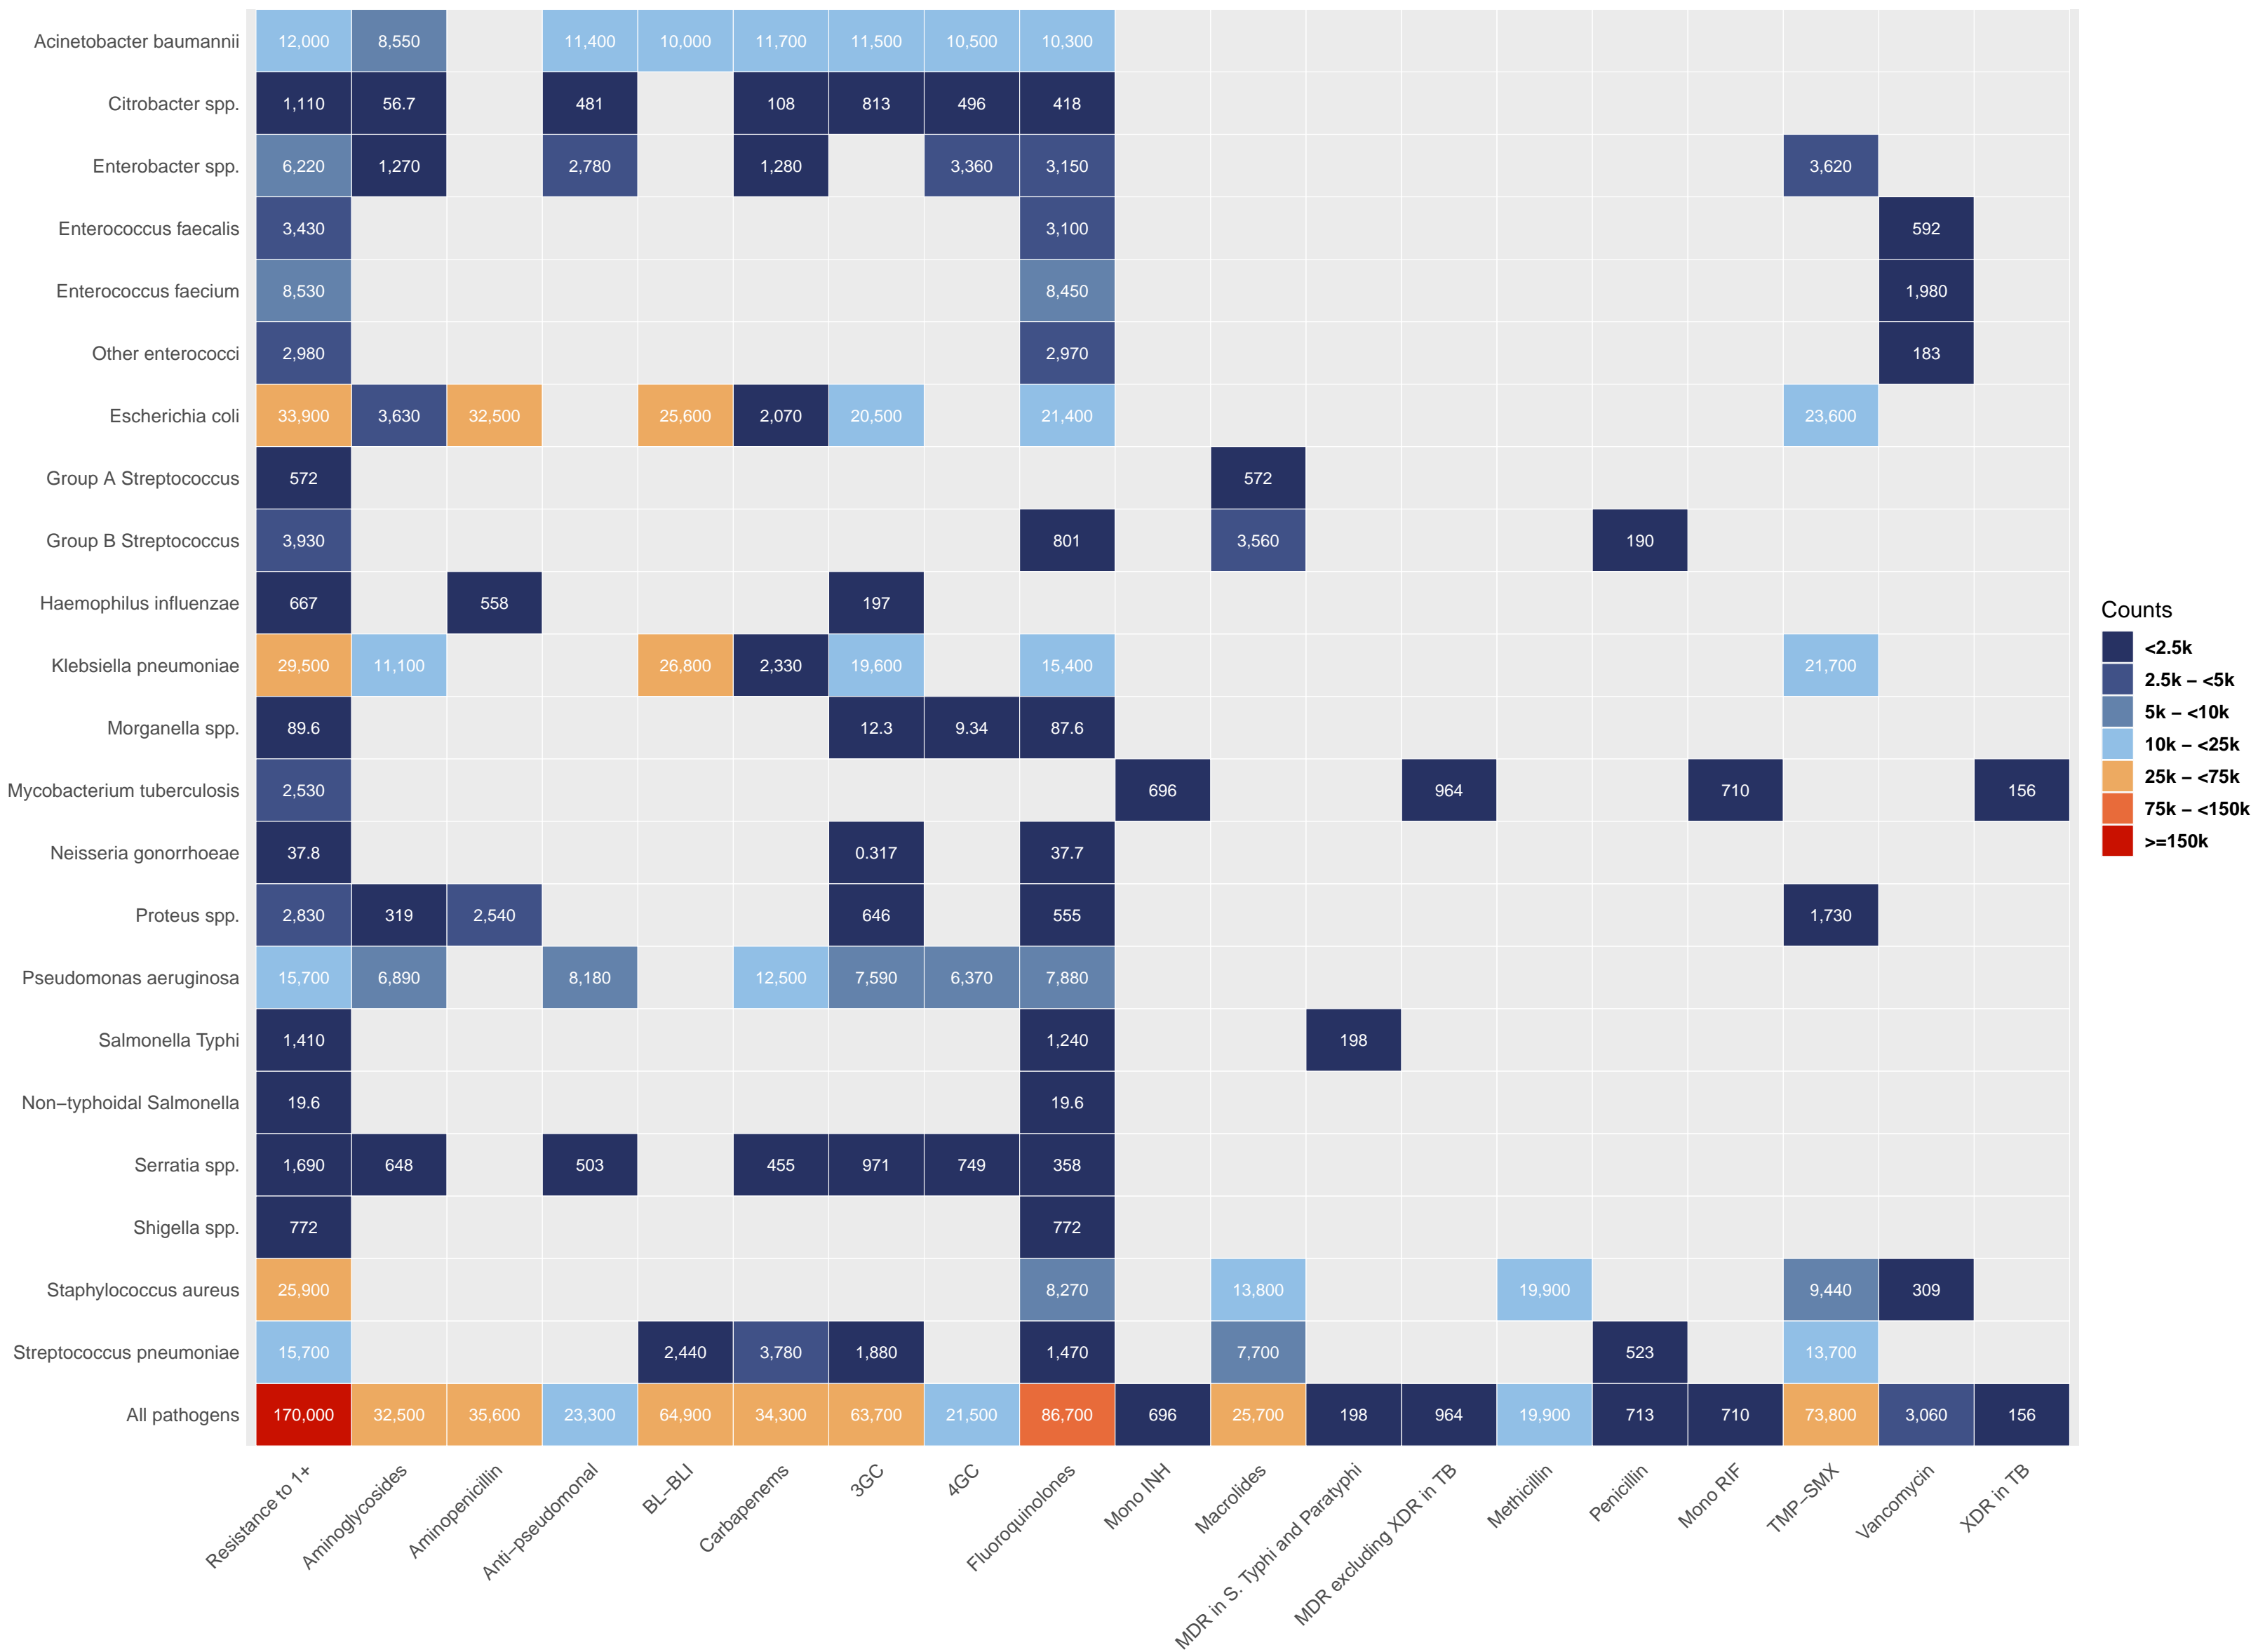

# Honduras

DALYs (count) attributable to bacterial antimicrobial resistance by pathogen–drug combinations, 2019

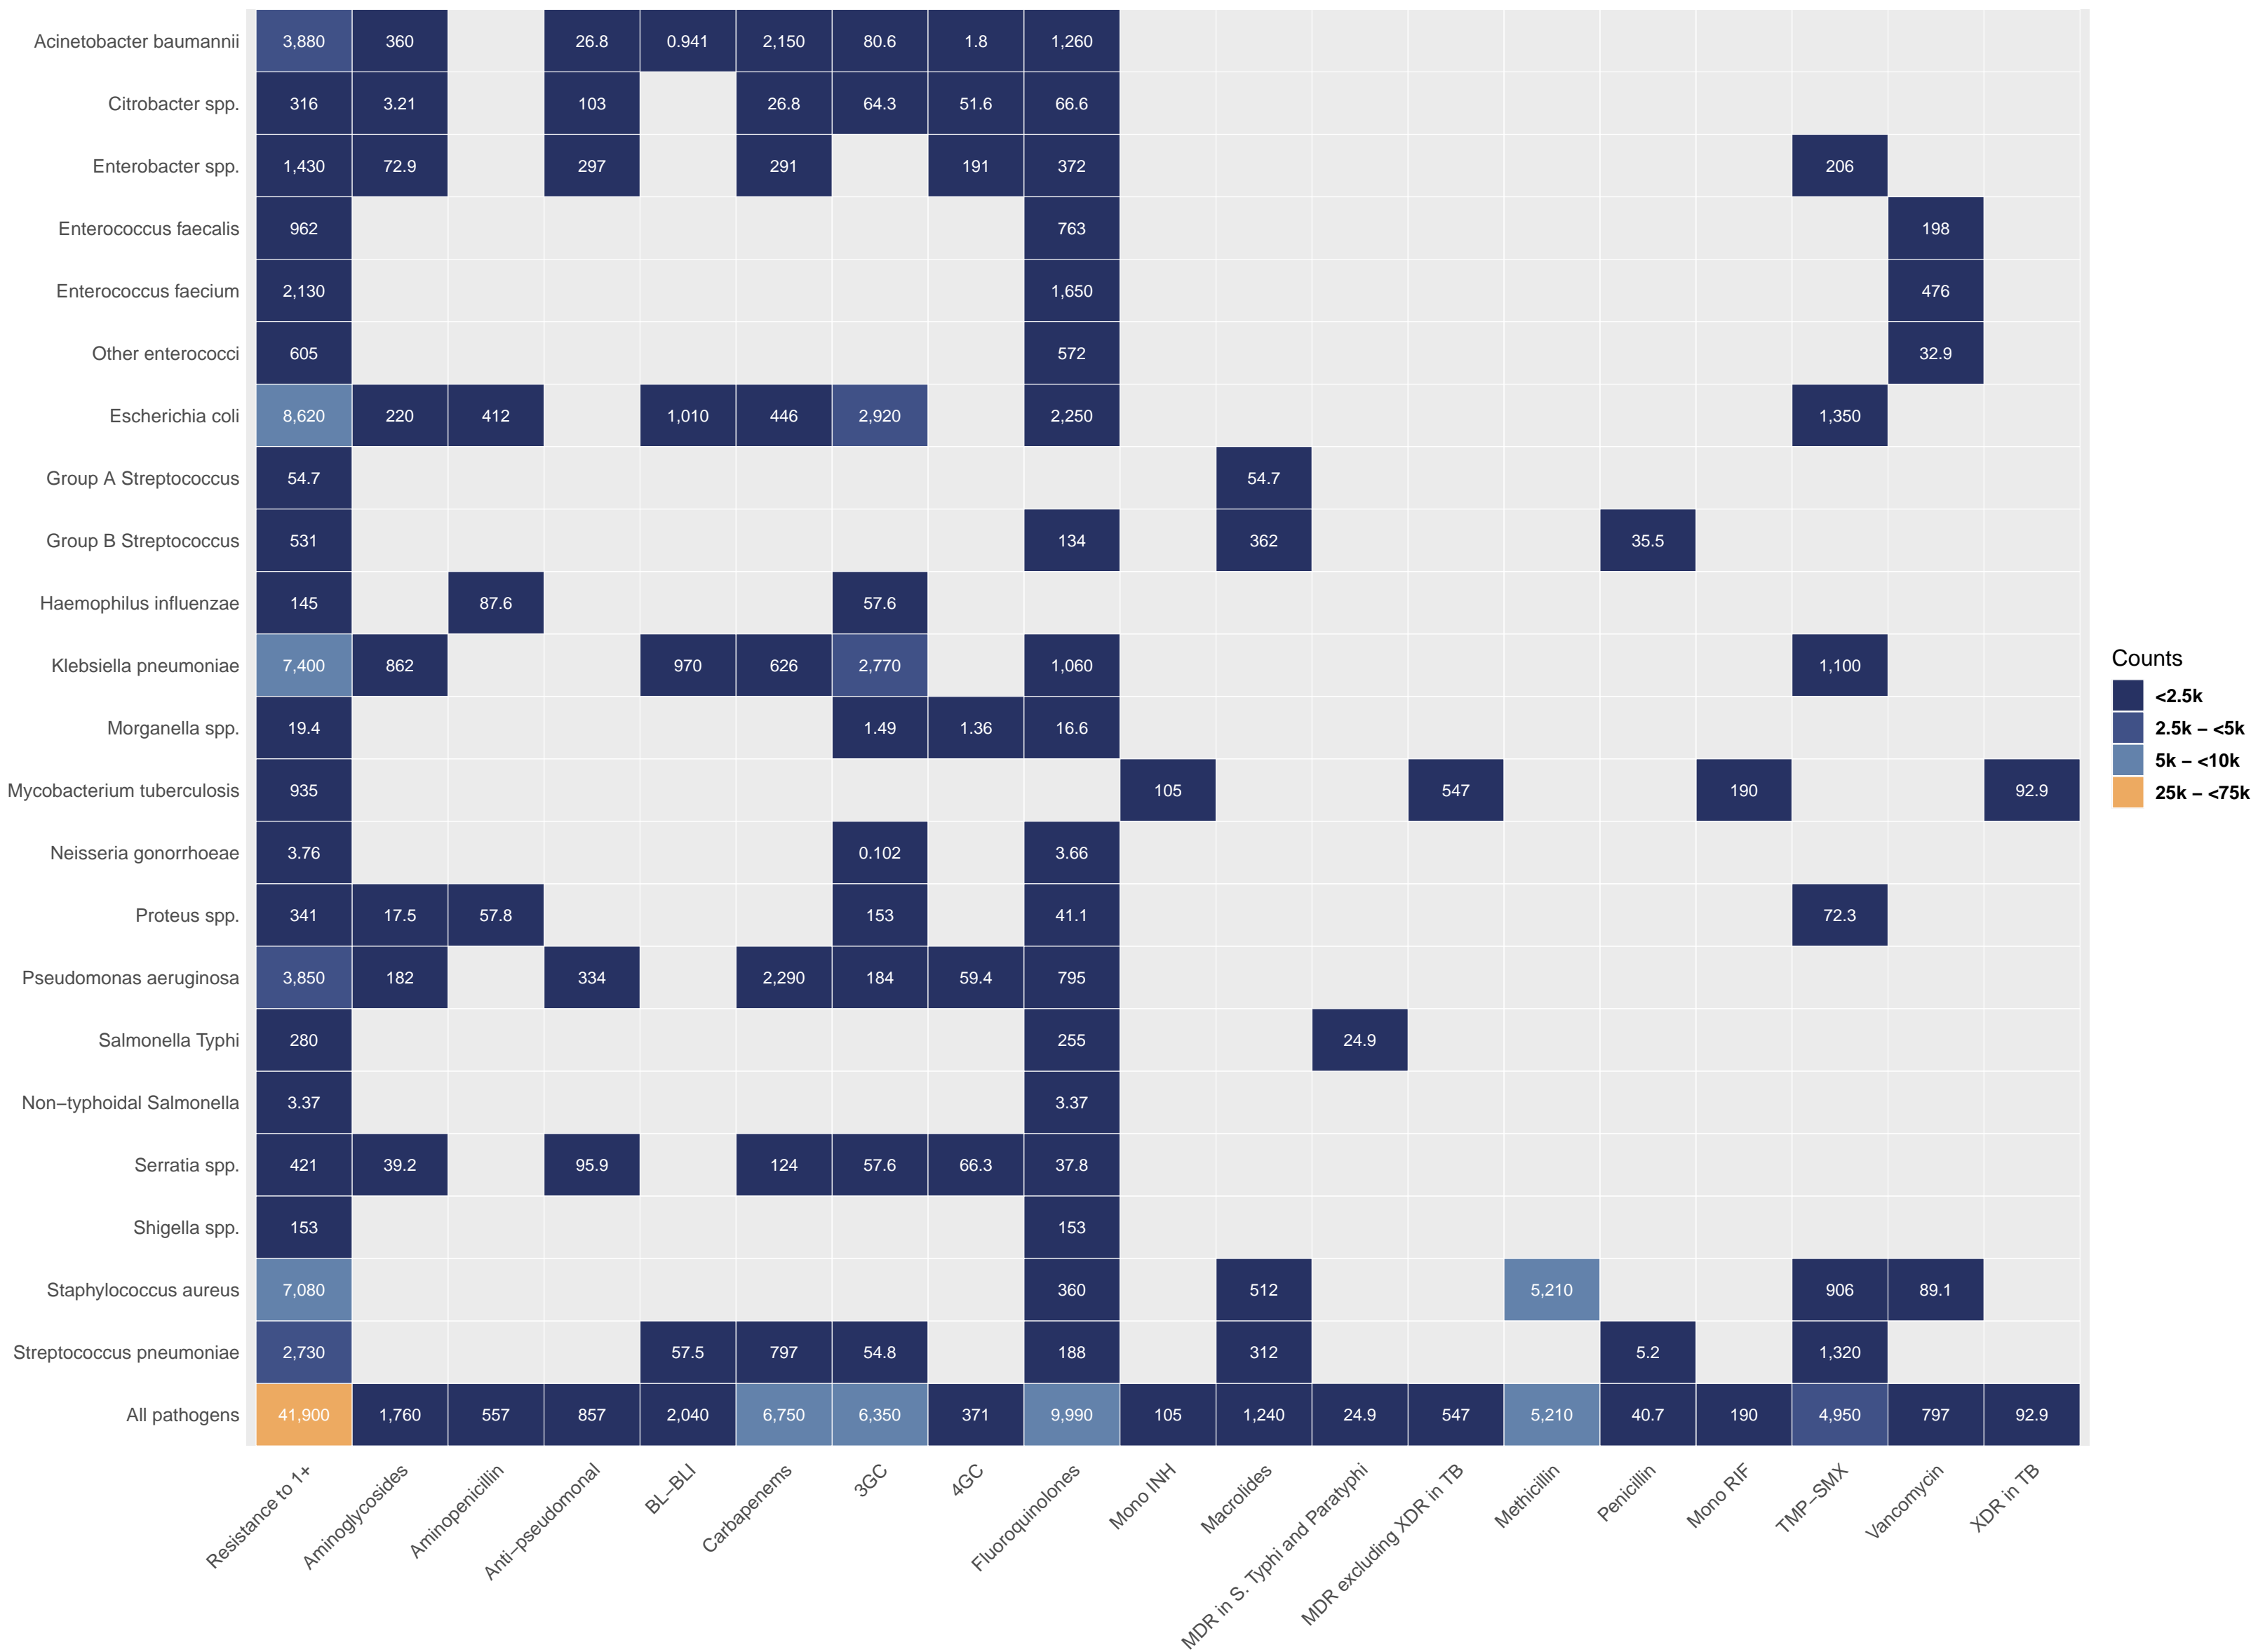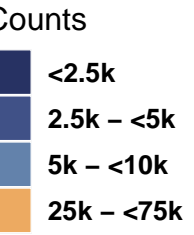



# Jamaica

DALYs (count) associated with bacterial antimicrobial resistance by pathogen–drug combinations, 2019

|                            |                  |                 |                 |                  |        |             |        |       |                  |          |            |                               |                         |             |            |          |         |            |           |
|----------------------------|------------------|-----------------|-----------------|------------------|--------|-------------|--------|-------|------------------|----------|------------|-------------------------------|-------------------------|-------------|------------|----------|---------|------------|-----------|
| Acinetobacter baumannii    | 6,510            | 4,220           |                 | 5,740            | 5,410  | 5,490       | 6,140  | 6,070 | 5,350            |          |            |                               |                         |             |            |          |         |            |           |
| Citrobacter spp.           | 296              | 15.8            |                 | 87.7             |        | 49.4        | 204    | 119   | 106              |          |            |                               |                         |             |            |          |         |            |           |
| Enterobacter spp.          | 2,150            | 301             |                 | 803              |        | 401         |        | 1,110 | 1,030            |          |            |                               |                         |             |            |          | 1,180   |            |           |
| Enterococcus faecalis      | 563              |                 |                 |                  |        |             |        |       | 502              |          |            |                               |                         |             |            |          |         | 110        |           |
| Enterococcus faecium       | 1,280            |                 |                 |                  |        |             |        |       | 1,270            |          |            |                               |                         |             |            |          |         | 392        |           |
| Other enterococci          | 1,090            |                 |                 |                  |        |             |        |       | 1,090            |          |            |                               |                         |             |            |          |         | 244        |           |
| Escherichia coli           | 4,980            | 546             | 4,780           |                  | 4,000  | 230         | 2,450  |       | 2,670            |          |            |                               |                         |             |            |          | 3,340   |            |           |
| Group A Streptococcus      | 365              |                 |                 |                  |        |             |        |       |                  |          | 365        |                               |                         |             |            |          |         |            |           |
| Group B Streptococcus      | 772              |                 |                 |                  |        |             |        |       | 134              |          | 702        |                               |                         | 55.2        |            |          |         |            |           |
| Haemophilus influenzae     | 106              |                 | 78.4            |                  |        |             |        | 43.1  |                  |          |            |                               |                         |             |            |          |         |            |           |
| Klebsiella pneumoniae      | 4,660            | 1,230           |                 |                  | 3,400  | 289         | 4,550  |       | 2,220            |          |            |                               |                         |             |            |          | 3,070   |            |           |
| Morganella spp.            | 17.1             |                 |                 |                  |        |             |        | 4.74  | 2.56             | 15.5     |            |                               |                         |             |            |          |         |            |           |
| Mycobacterium tuberculosis | 15.4             |                 |                 |                  |        |             |        |       |                  | 0.685    |            |                               | 12.6                    |             |            | 0.183    |         |            | 1.91      |
| Neisseria gonorrhoeae      | 22.8             |                 |                 |                  |        |             |        | 0.184 |                  | 22.7     |            |                               |                         |             |            |          |         |            |           |
| Proteus spp.               | 530              | 23.7            | 464             |                  |        |             |        | 103   | 116              |          |            |                               |                         |             |            |          |         | 335        |           |
| Pseudomonas aeruginosa     | 2,690            | 642             |                 | 1,530            |        | 1,870       | 1,460  | 1,130 | 1,160            |          |            |                               |                         |             |            |          |         |            |           |
| Salmonella Typhi           | 73.9             |                 |                 |                  |        |             |        |       | 59.9             |          |            | 16                            |                         |             |            |          |         |            |           |
| Non-typhoidal Salmonella   | 3.01             |                 |                 |                  |        |             |        |       | 3.01             |          |            |                               |                         |             |            |          |         |            |           |
| Serratia spp.              | 353              | 86.3            |                 | 84.1             |        | 91.3        | 258    | 133   | 66.6             |          |            |                               |                         |             |            |          |         |            |           |
| Shigella spp.              | 4.95             |                 |                 |                  |        |             |        |       | 4.95             |          |            |                               |                         |             |            |          |         |            |           |
| Staphylococcus aureus      | 4,870            |                 |                 |                  |        |             |        |       | 1,790            |          | 2,800      |                               |                         | 4,540       |            |          |         | 339        | 72.2      |
| Streptococcus pneumoniae   | 3,530            |                 |                 |                  | 705    | 1,110       | 571    |       | 184              |          | 1,960      |                               |                         |             | 1,540      |          |         | 2,630      |           |
| All pathogens              | 34,900           | 7,070           | 5,320           | 8,250            | 13,500 | 9,540       | 15,800 | 8,560 | 17,800           | 0.685    | 5,830      | 16                            | 12.6                    | 4,540       | 1,600      | 0.183    | 10,900  | 818        | 1.91      |
|                            | Resistance to 1+ | Aminoglycosides | Aminopenicillin | Anti-pseudomonal | BL-BLI | Carbapenems | 3GC    | 4GC   | Fluoroquinolones | Mono INH | Macrolides | MDR in S. Typhi and Paratyphi | MDR excluding XDR in TB | Methicillin | Penicillin | Mono RIF | TMP-SMX | Vancomycin | XDR in TB |

Counts

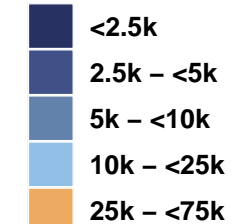

# Jamaica

DALYs (count) *attributable to bacterial antimicrobial resistance by pathogen–drug combinations, 2019*

|                            |                  |                 |                 |                  |        |             |       |       |                  |          |            |                               |                         |             |            |          |         |            |           |
|----------------------------|------------------|-----------------|-----------------|------------------|--------|-------------|-------|-------|------------------|----------|------------|-------------------------------|-------------------------|-------------|------------|----------|---------|------------|-----------|
| Acinetobacter baumannii    | 2,060            | 180             |                 | 119              | 11.6   | 933         | 91.4  | 65.5  | 662              |          |            |                               |                         |             |            |          |         |            |           |
| Citrobacter spp.           | 84.4             | 0.939           |                 | 18.3             |        | 12.7        | 21.9  | 12.8  | 17.7             |          |            |                               |                         |             |            |          |         |            |           |
| Enterobacter spp.          | 485              | 18.4            |                 | 91               |        | 96.5        |       | 77    | 130              |          |            |                               |                         |             |            |          | 72.4    |            |           |
| Enterococcus faecalis      | 159              |                 |                 |                  |        |             |       |       | 123              |          |            |                               |                         |             |            |          |         | 36.7       |           |
| Enterococcus faecium       | 331              |                 |                 |                  |        |             |       |       | 240              |          |            |                               |                         |             |            |          |         | 91.8       |           |
| Other enterococci          | 237              |                 |                 |                  |        |             |       |       | 196              |          |            |                               |                         |             |            |          |         | 41.1       |           |
| Escherichia coli           | 1,200            | 34.3            | 61.2            |                  | 212    | 53.1        | 357   |       | 280              |          |            |                               |                         |             |            |          | 202     |            |           |
| Group A Streptococcus      | 34.9             |                 |                 |                  |        |             |       |       |                  |          | 34.9       |                               |                         |             |            |          |         |            |           |
| Group B Streptococcus      | 104              |                 |                 |                  |        |             |       |       | 22.3             |          | 71.6       |                               |                         | 10.1        |            |          |         |            |           |
| Haemophilus influenzae     | 24.4             |                 | 11.9            |                  |        |             | 12.6  |       |                  |          |            |                               |                         |             |            |          |         |            |           |
| Klebsiella pneumoniae      | 1,330            | 96.9            |                 |                  | 8.99   | 78.4        | 826   |       | 160              |          |            |                               |                         |             |            |          | 156     |            |           |
| Morganella spp.            | 3.9              |                 |                 |                  |        |             | 0.638 | 0.451 | 2.81             |          |            |                               |                         |             |            |          |         |            |           |
| Mycobacterium tuberculosis | 7.11             |                 |                 |                  |        |             |       |       |                  | 0.088    |            |                               | 5.95                    |             |            | 0.044    |         |            | 1.03      |
| Neisseria gonorrhoeae      | 2.24             |                 |                 |                  |        |             | 0.053 |       | 2.19             |          |            |                               |                         |             |            |          |         |            |           |
| Proteus spp.               | 61               | 1.66            | 11              |                  |        |             | 25.1  |       | 8.72             |          |            |                               |                         |             |            |          | 14.5    |            |           |
| Pseudomonas aeruginosa     | 678              | 17.3            |                 | 117              |        | 359         | 47.4  | 15    | 122              |          |            |                               |                         |             |            |          |         |            |           |
| Salmonella Typhi           | 14.3             |                 |                 |                  |        |             |       |       | 12.3             |          |            | 2.01                          |                         |             |            |          |         |            |           |
| Non-typhoidal Salmonella   | 0.545            |                 |                 |                  |        |             |       |       | 0.545            |          |            |                               |                         |             |            |          |         |            |           |
| Serratia spp.              | 94               | 5.18            |                 | 17.7             |        | 25.3        | 25.5  | 13    | 7.29             |          |            |                               |                         |             |            |          |         |            |           |
| Shigella spp.              | 0.796            |                 |                 |                  |        |             |       |       | 0.796            |          |            |                               |                         |             |            |          |         |            |           |
| Staphylococcus aureus      | 1,490            |                 |                 |                  |        |             |       |       | 81               |          | 102        |                               | 1,260                   |             |            |          | 26.4    | 17.1       |           |
| Streptococcus pneumoniae   | 705              |                 |                 |                  | 15.7   | 243         | 16.3  |       | 21.7             |          | 78.6       |                               |                         | 95.3        |            |          | 234     |            |           |
| All pathogens              | 9,110            | 355             | 84.1            | 363              | 248    | 1,800       | 1,420 | 184   | 2,090            | 0.088    | 287        | 2.01                          | 5.95                    | 1,260       | 105        | 0.044    | 705     | 187        | 1.03      |
|                            | Resistance to 1+ | Aminoglycosides | Aminopenicillin | Anti-pseudomonal | BL-BLI | Carbapenems | 3GC   | 4GC   | Fluoroquinolones | Mono INH | Macrolides | MDR in S. Typhi and Paratyphi | MDR excluding XDR in TB | Methicillin | Penicillin | Mono RIF | TMP-SMX | Vancomycin | XDR in TB |

Counts

<2.5k

5k – <10k

# Mexico

DALYs (count) associated with bacterial antimicrobial resistance by pathogen–drug combinations, 2019

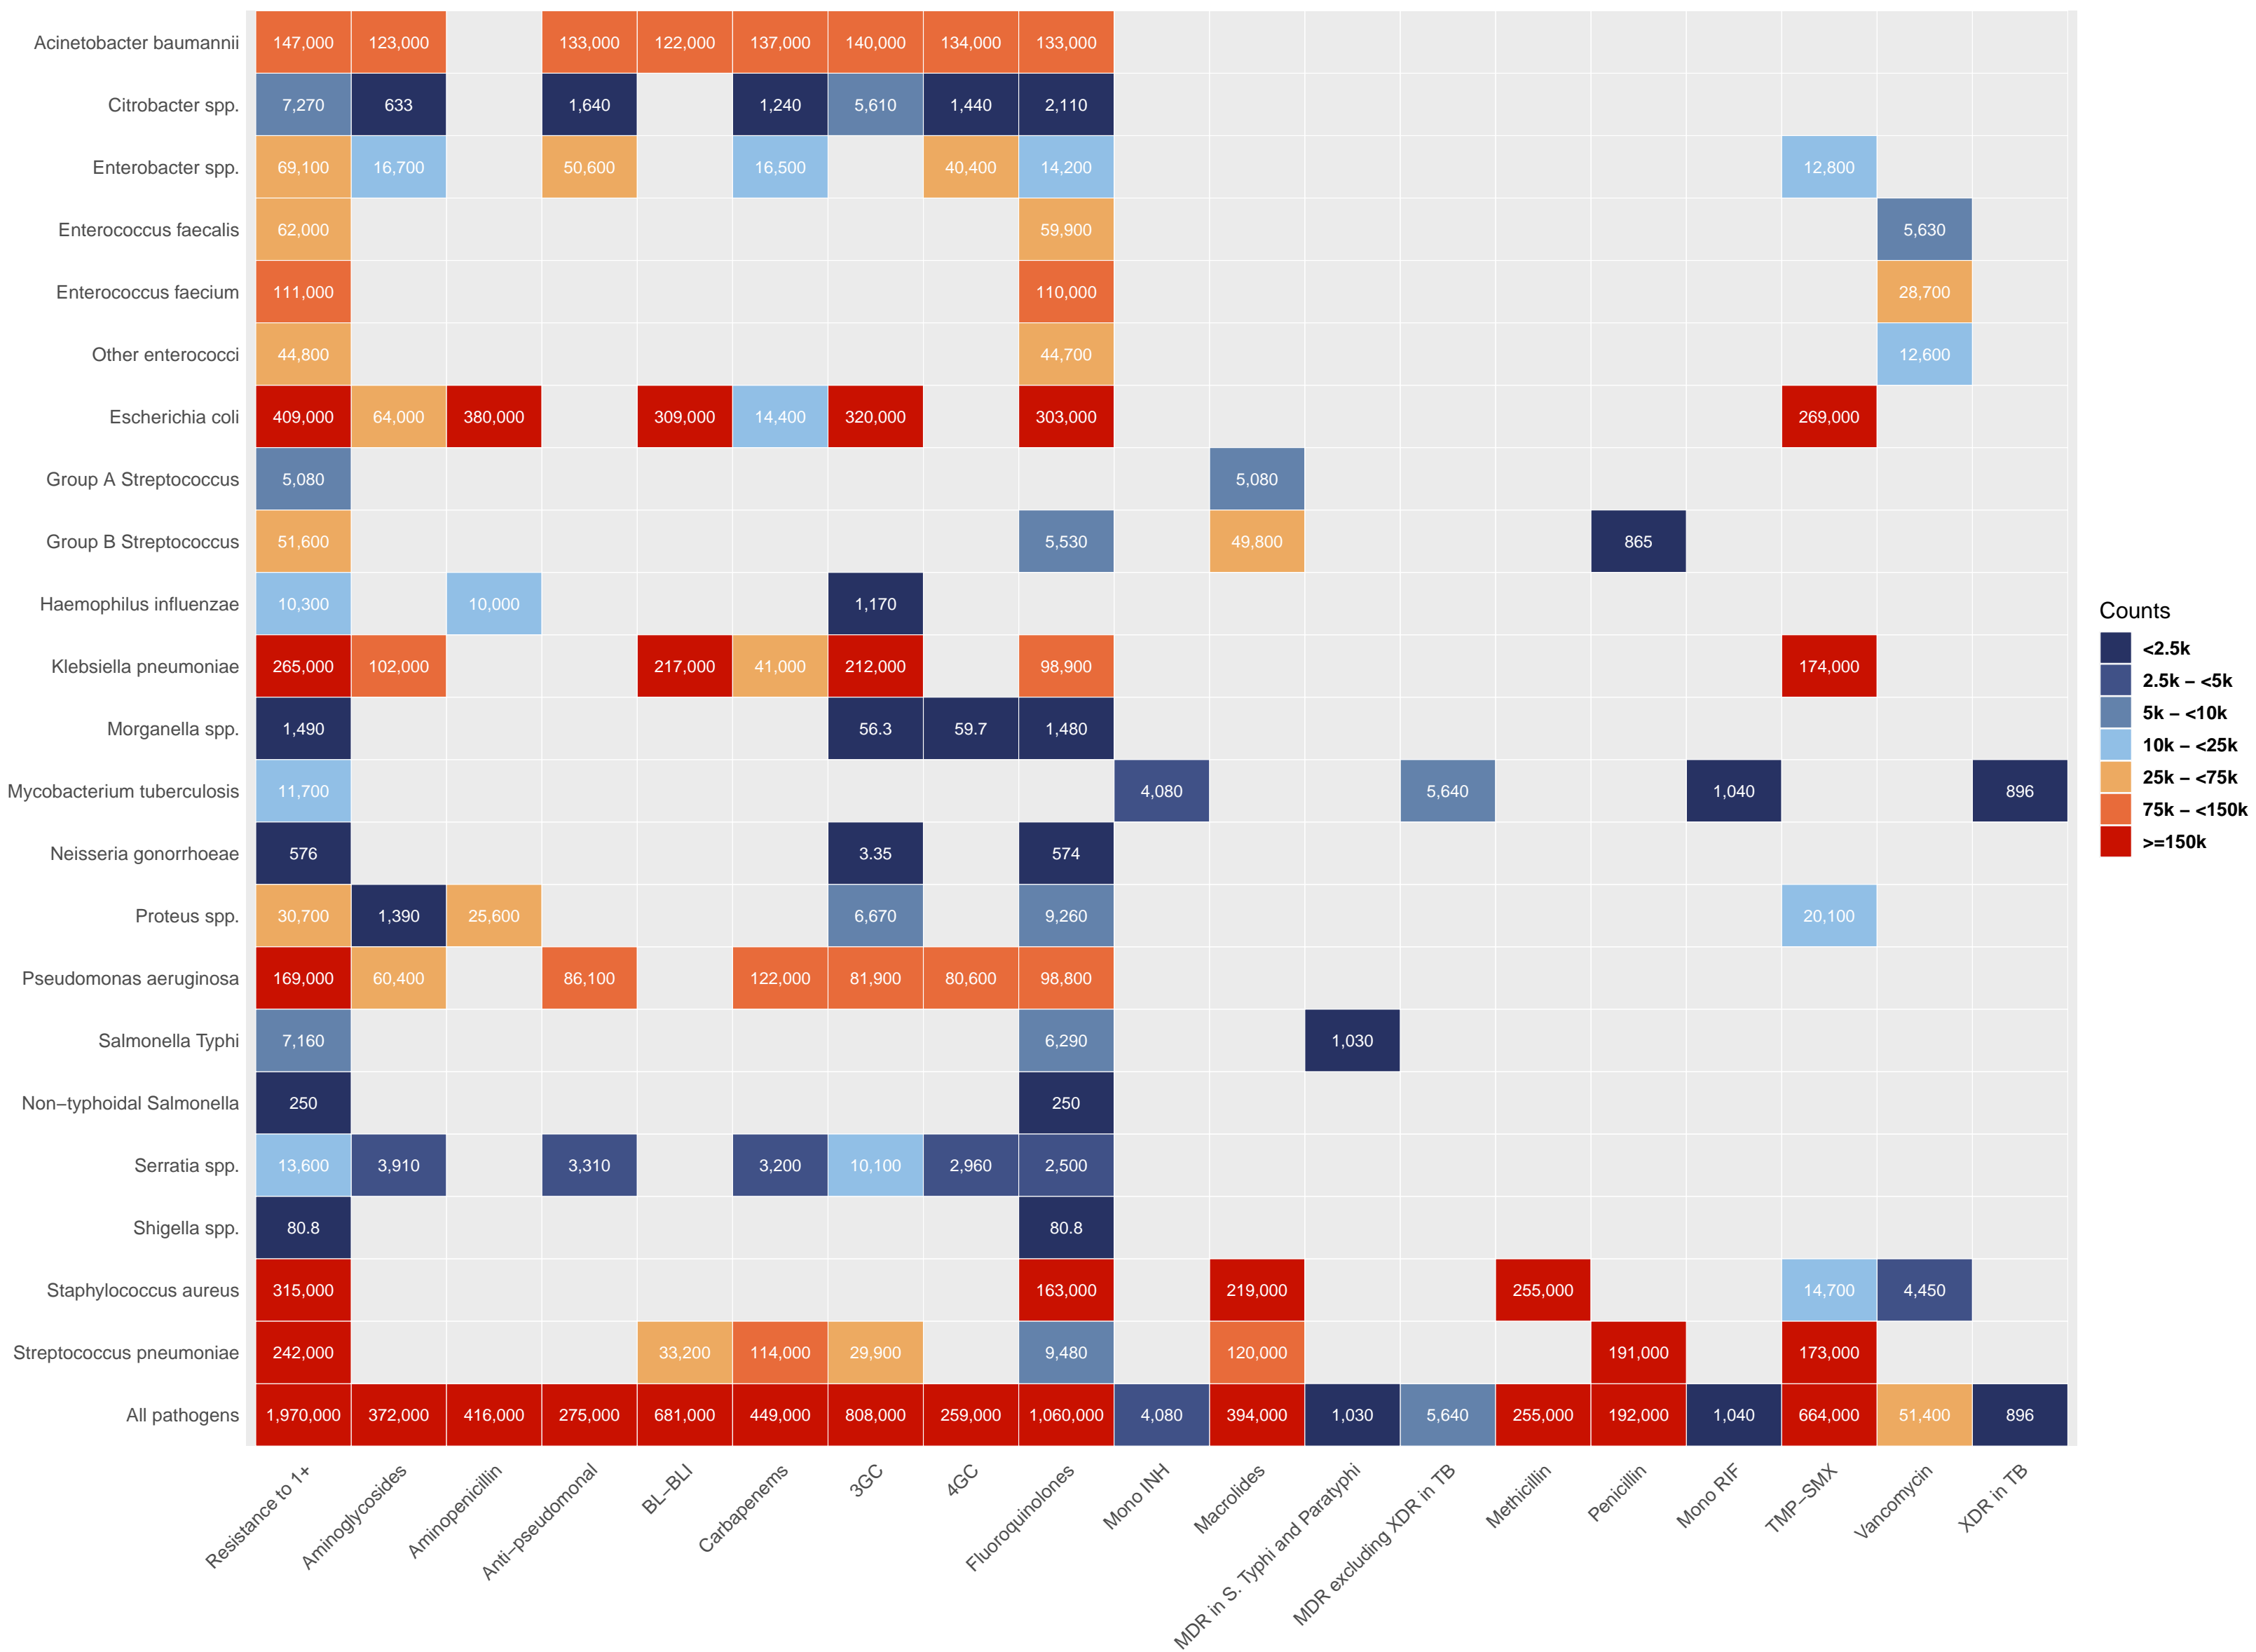

# Mexico

DALYs (count) *attributable to bacterial antimicrobial resistance by pathogen–drug combinations, 2019*

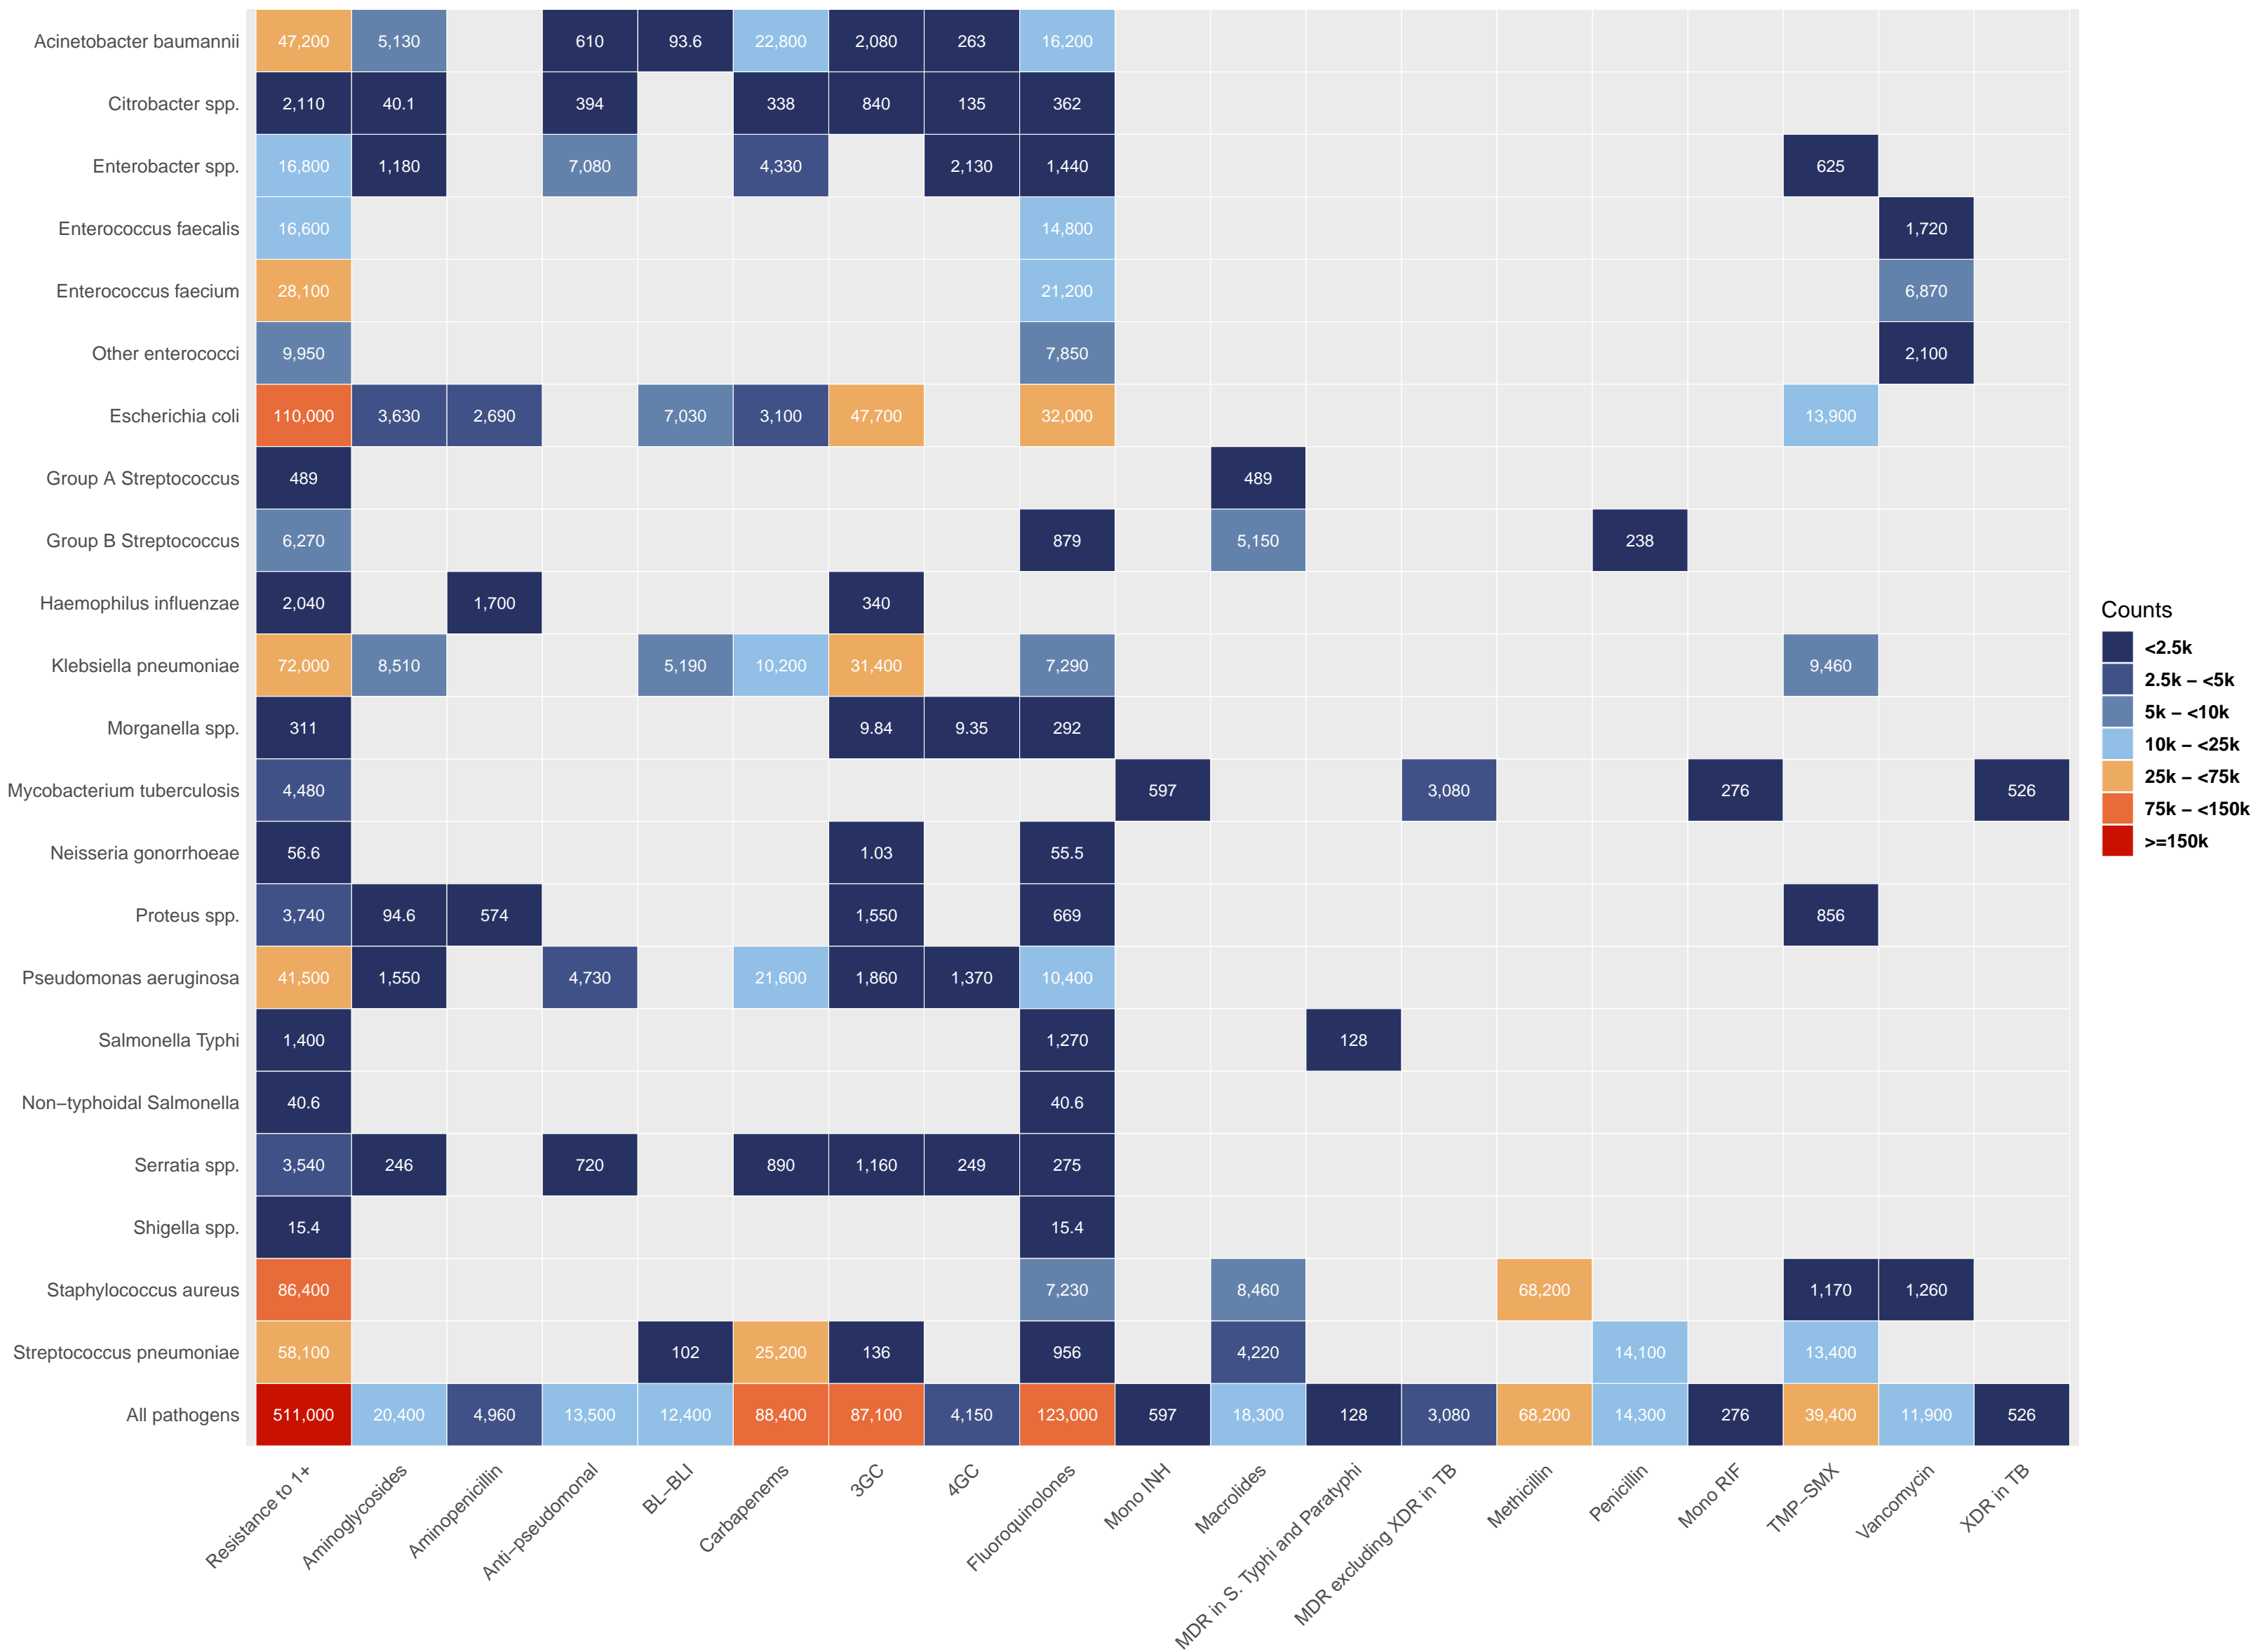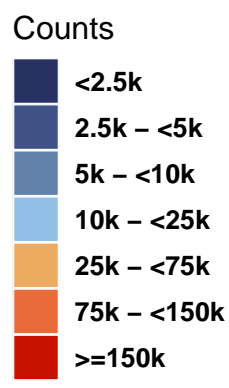

# Nicaragua

DALYs (count) associated with bacterial antimicrobial resistance by pathogen–drug combinations, 2019

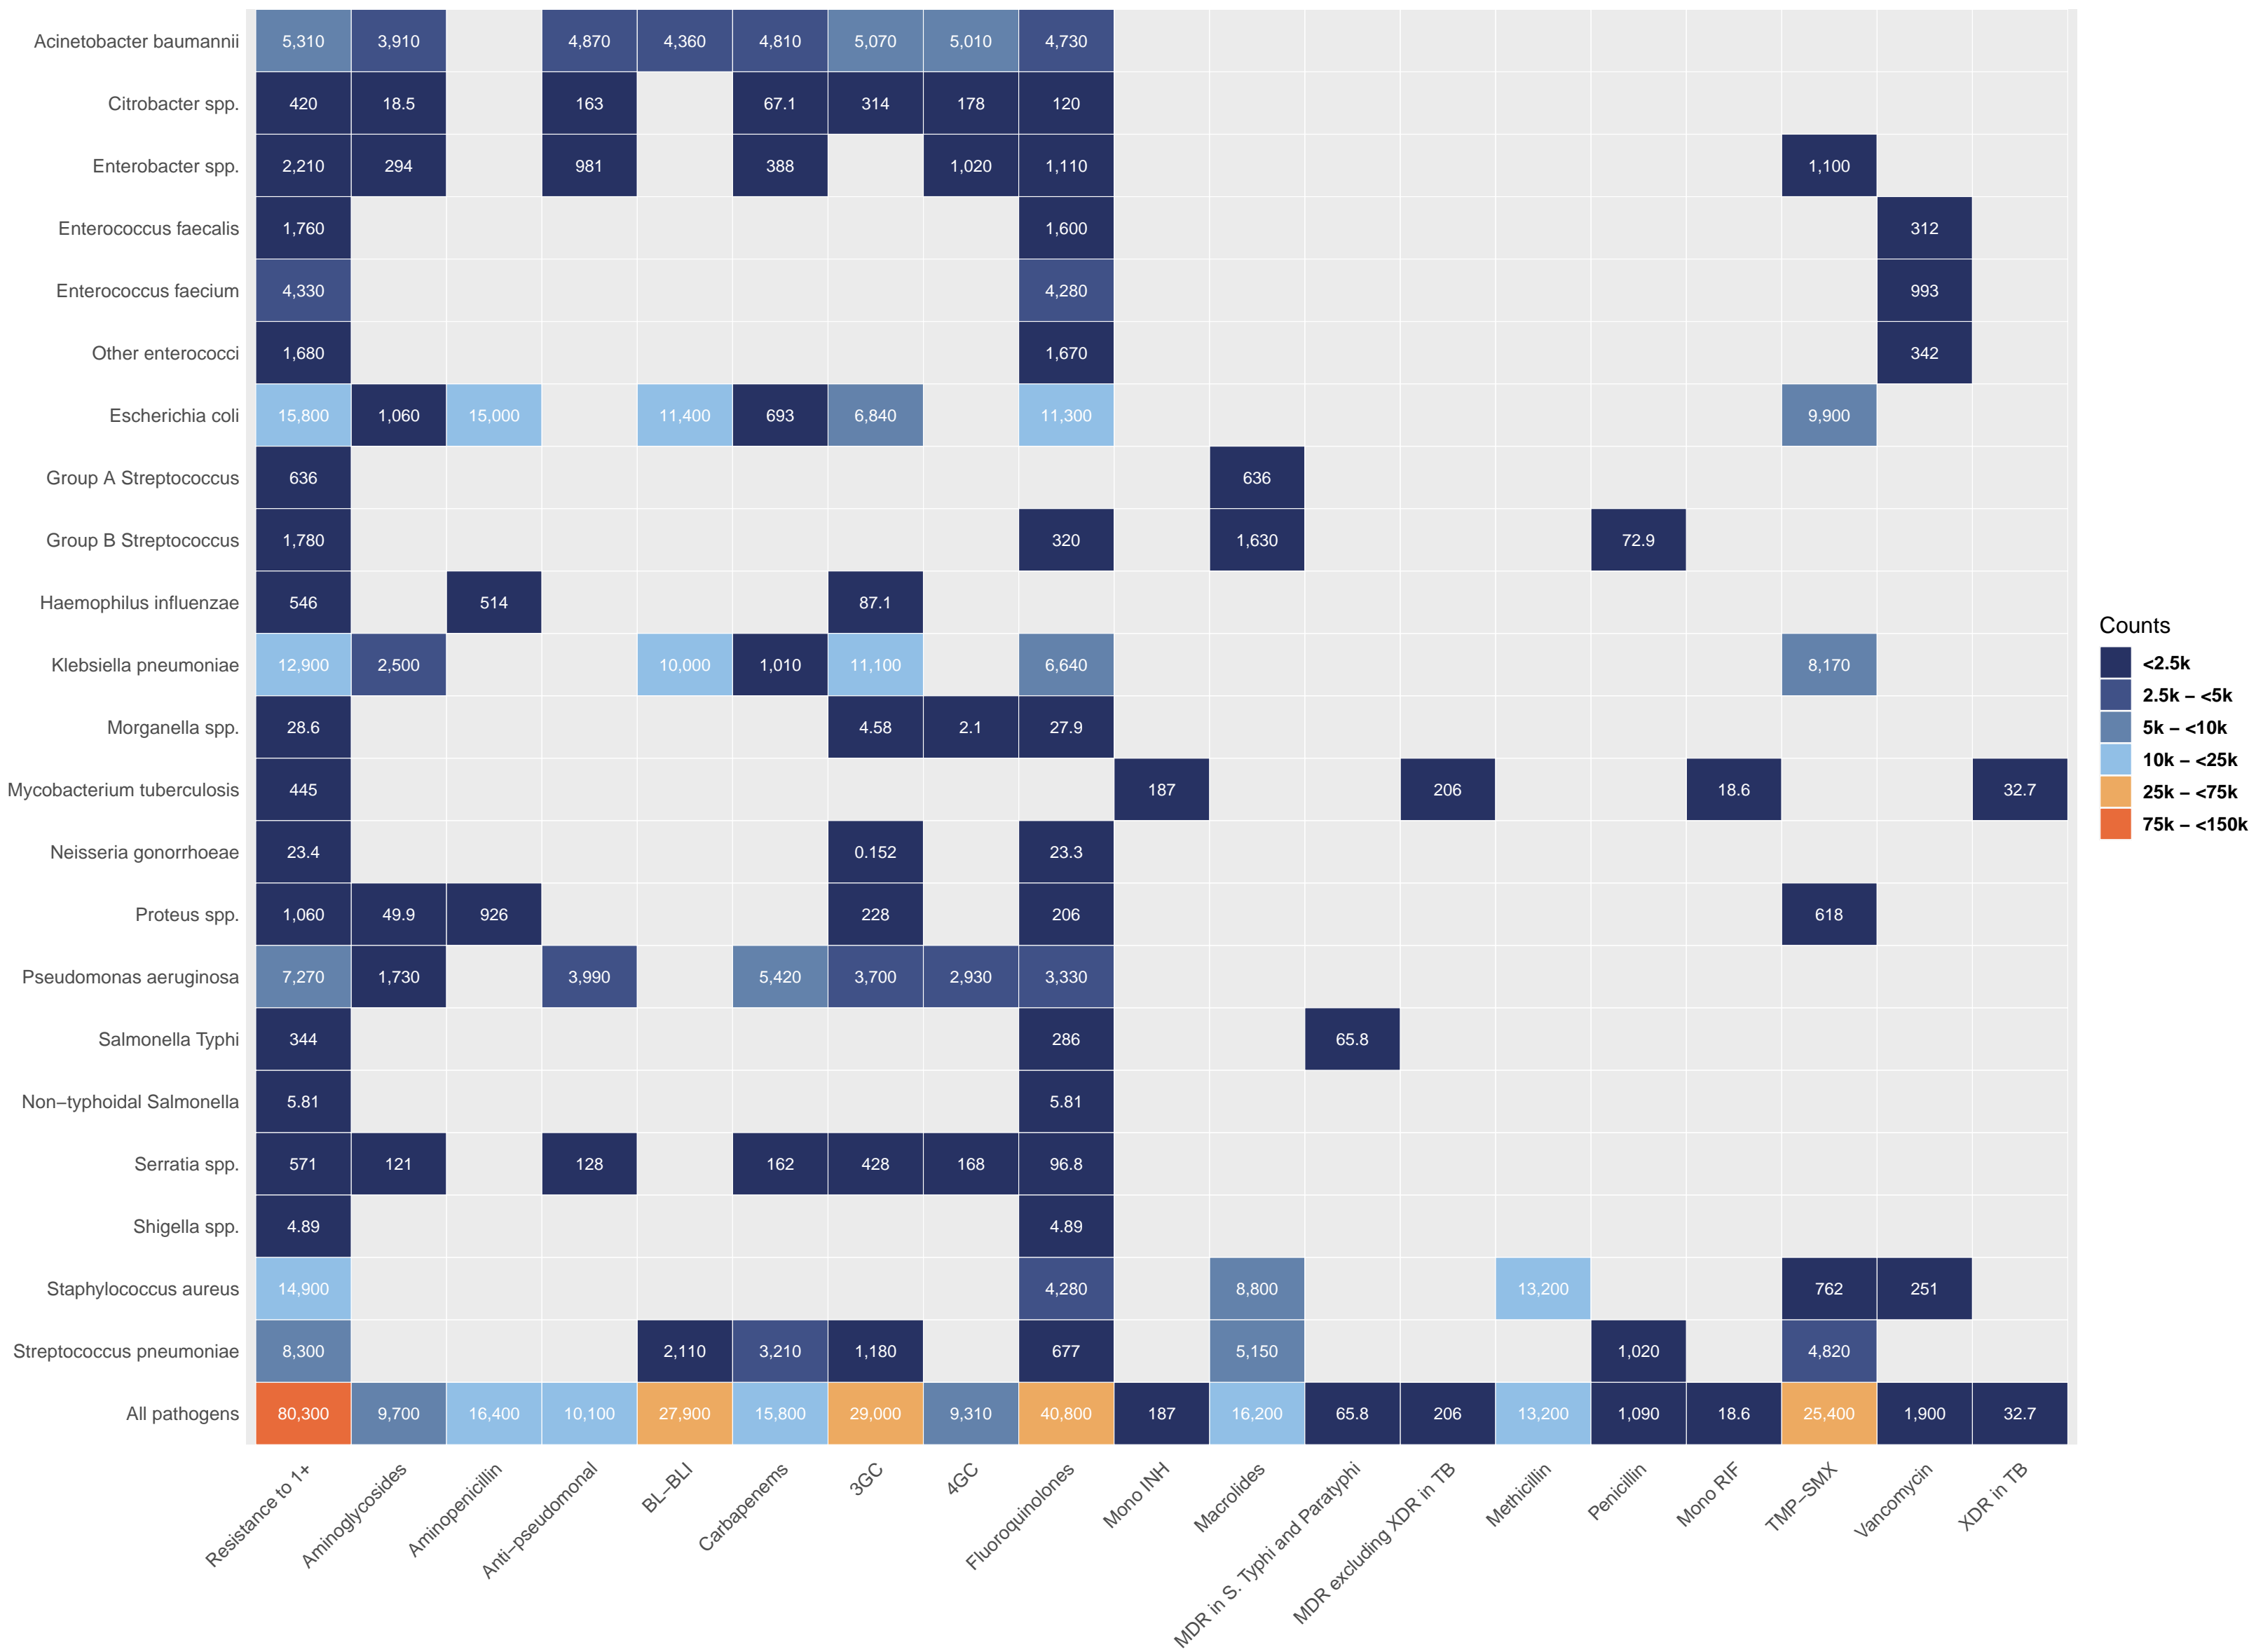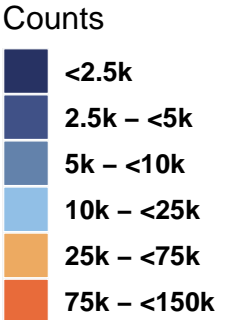

# Nicaragua

DALYs (count) *attributable to bacterial antimicrobial resistance by pathogen–drug combinations, 2019*

|                            |                  |                 |                 |                  |        |             |       |       |                  |          |            |                               |                         |             |            |          |         |            |           |
|----------------------------|------------------|-----------------|-----------------|------------------|--------|-------------|-------|-------|------------------|----------|------------|-------------------------------|-------------------------|-------------|------------|----------|---------|------------|-----------|
| Acinetobacter baumannii    | 1,700            | 163             |                 | 58.6             | 2.75   | 805         | 57.6  | 27.8  | 584              |          |            |                               |                         |             |            |          |         |            |           |
| Citrobacter spp.           | 121              | 1.15            |                 | 35.1             |        | 17.5        | 29.5  | 18.6  | 19               |          |            |                               |                         |             |            |          |         |            |           |
| Enterobacter spp.          | 501              | 18.1            |                 | 118              |        | 93.4        |       | 61.3  | 145              |          |            |                               |                         |             |            | 66.1     |         |            |           |
| Enterococcus faecalis      | 494              |                 |                 |                  |        |             |       |       | 391              |          |            |                               |                         |             |            |          |         | 103        |           |
| Enterococcus faecium       | 1,080            |                 |                 |                  |        |             |       |       | 838              |          |            |                               |                         |             |            |          |         | 240        |           |
| Other enterococci          | 361              |                 |                 |                  |        |             |       |       | 304              |          |            |                               |                         |             |            |          |         | 57.4       |           |
| Escherichia coli           | 3,850            | 72.5            | 271             |                  | 601    | 152         | 878   |       | 1,330            |          |            |                               |                         |             |            | 552      |         |            |           |
| Group A Streptococcus      | 60.5             |                 |                 |                  |        |             |       |       |                  |          | 60.5       |                               |                         |             |            |          |         |            |           |
| Group B Streptococcus      | 234              |                 |                 |                  |        |             |       |       | 53.3             |          | 167        |                               |                         | 14          |            |          |         |            |           |
| Haemophilus influenzae     | 110              |                 | 85.1            |                  |        |             | 25.2  |       |                  |          |            |                               |                         |             |            |          |         |            |           |
| Klebsiella pneumoniae      | 3,520            | 221             |                 |                  | 168    | 289         | 1,890 |       | 505              |          |            |                               |                         |             |            | 439      |         |            |           |
| Morganella spp.            | 6.19             |                 |                 |                  |        |             | 0.611 | 0.328 | 5.25             |          |            |                               |                         |             |            |          |         |            |           |
| Mycobacterium tuberculosis | 162              |                 |                 |                  |        |             |       |       |                  | 27.2     |            |                               | 111                     |             |            | 4.89     |         |            | 19        |
| Neisseria gonorrhoeae      | 2.3              |                 |                 |                  |        |             | 0.05  |       | 2.25             |          |            |                               |                         |             |            |          |         |            |           |
| Proteus spp.               | 123              | 3.46            | 22              |                  |        |             | 55.5  |       | 15.6             |          |            |                               |                         |             |            | 26.8     |         |            |           |
| Pseudomonas aeruginosa     | 1,810            | 45.8            |                 | 252              |        | 1,030       | 106   | 34.1  | 347              |          |            |                               |                         |             |            |          |         |            |           |
| Salmonella Typhi           | 67               |                 |                 |                  |        |             |       |       | 58.8             |          |            | 8.17                          |                         |             |            |          |         |            |           |
| Non-typhoidal Salmonella   | 0.907            |                 |                 |                  |        |             |       |       | 0.907            |          |            |                               |                         |             |            |          |         |            |           |
| Serratia spp.              | 155              | 7.46            |                 | 27.4             |        | 45.7        | 48    | 15.4  | 10.6             |          |            |                               |                         |             |            |          |         |            |           |
| Shigella spp.              | 0.926            |                 |                 |                  |        |             |       |       | 0.926            |          |            |                               |                         |             |            |          |         |            |           |
| Staphylococcus aureus      | 4,390            |                 |                 |                  |        |             |       |       | 206              |          | 342        |                               | 3,710                   |             |            | 63.8     | 63.4    |            |           |
| Streptococcus pneumoniae   | 1,600            |                 |                 |                  | 53.7   | 757         | 18.5  |       | 92.5             |          | 234        |                               |                         | 11.7        |            | 435      |         |            |           |
| All pathogens              | 20,400           | 533             | 378             | 490              | 825    | 3,190       | 3,110 | 158   | 4,910            | 27.2     | 804        | 8.17                          | 111                     | 3,710       | 25.8       | 4.89     | 1,580   | 464        | 19        |
|                            | Resistance to 1+ | Aminoglycosides | Aminopenicillin | Anti-pseudomonal | BL-BLI | Carbapenems | 3GC   | 4GC   | Fluoroquinolones | Mono INH | Macrolides | MDR in S. Typhi and Paratyphi | MDR excluding XDR in TB | Methicillin | Penicillin | Mono RIF | TMP-SMX | Vancomycin | XDR in TB |

Counts



# Panama

DALYs (count) associated with bacterial antimicrobial resistance by pathogen–drug combinations, 2019

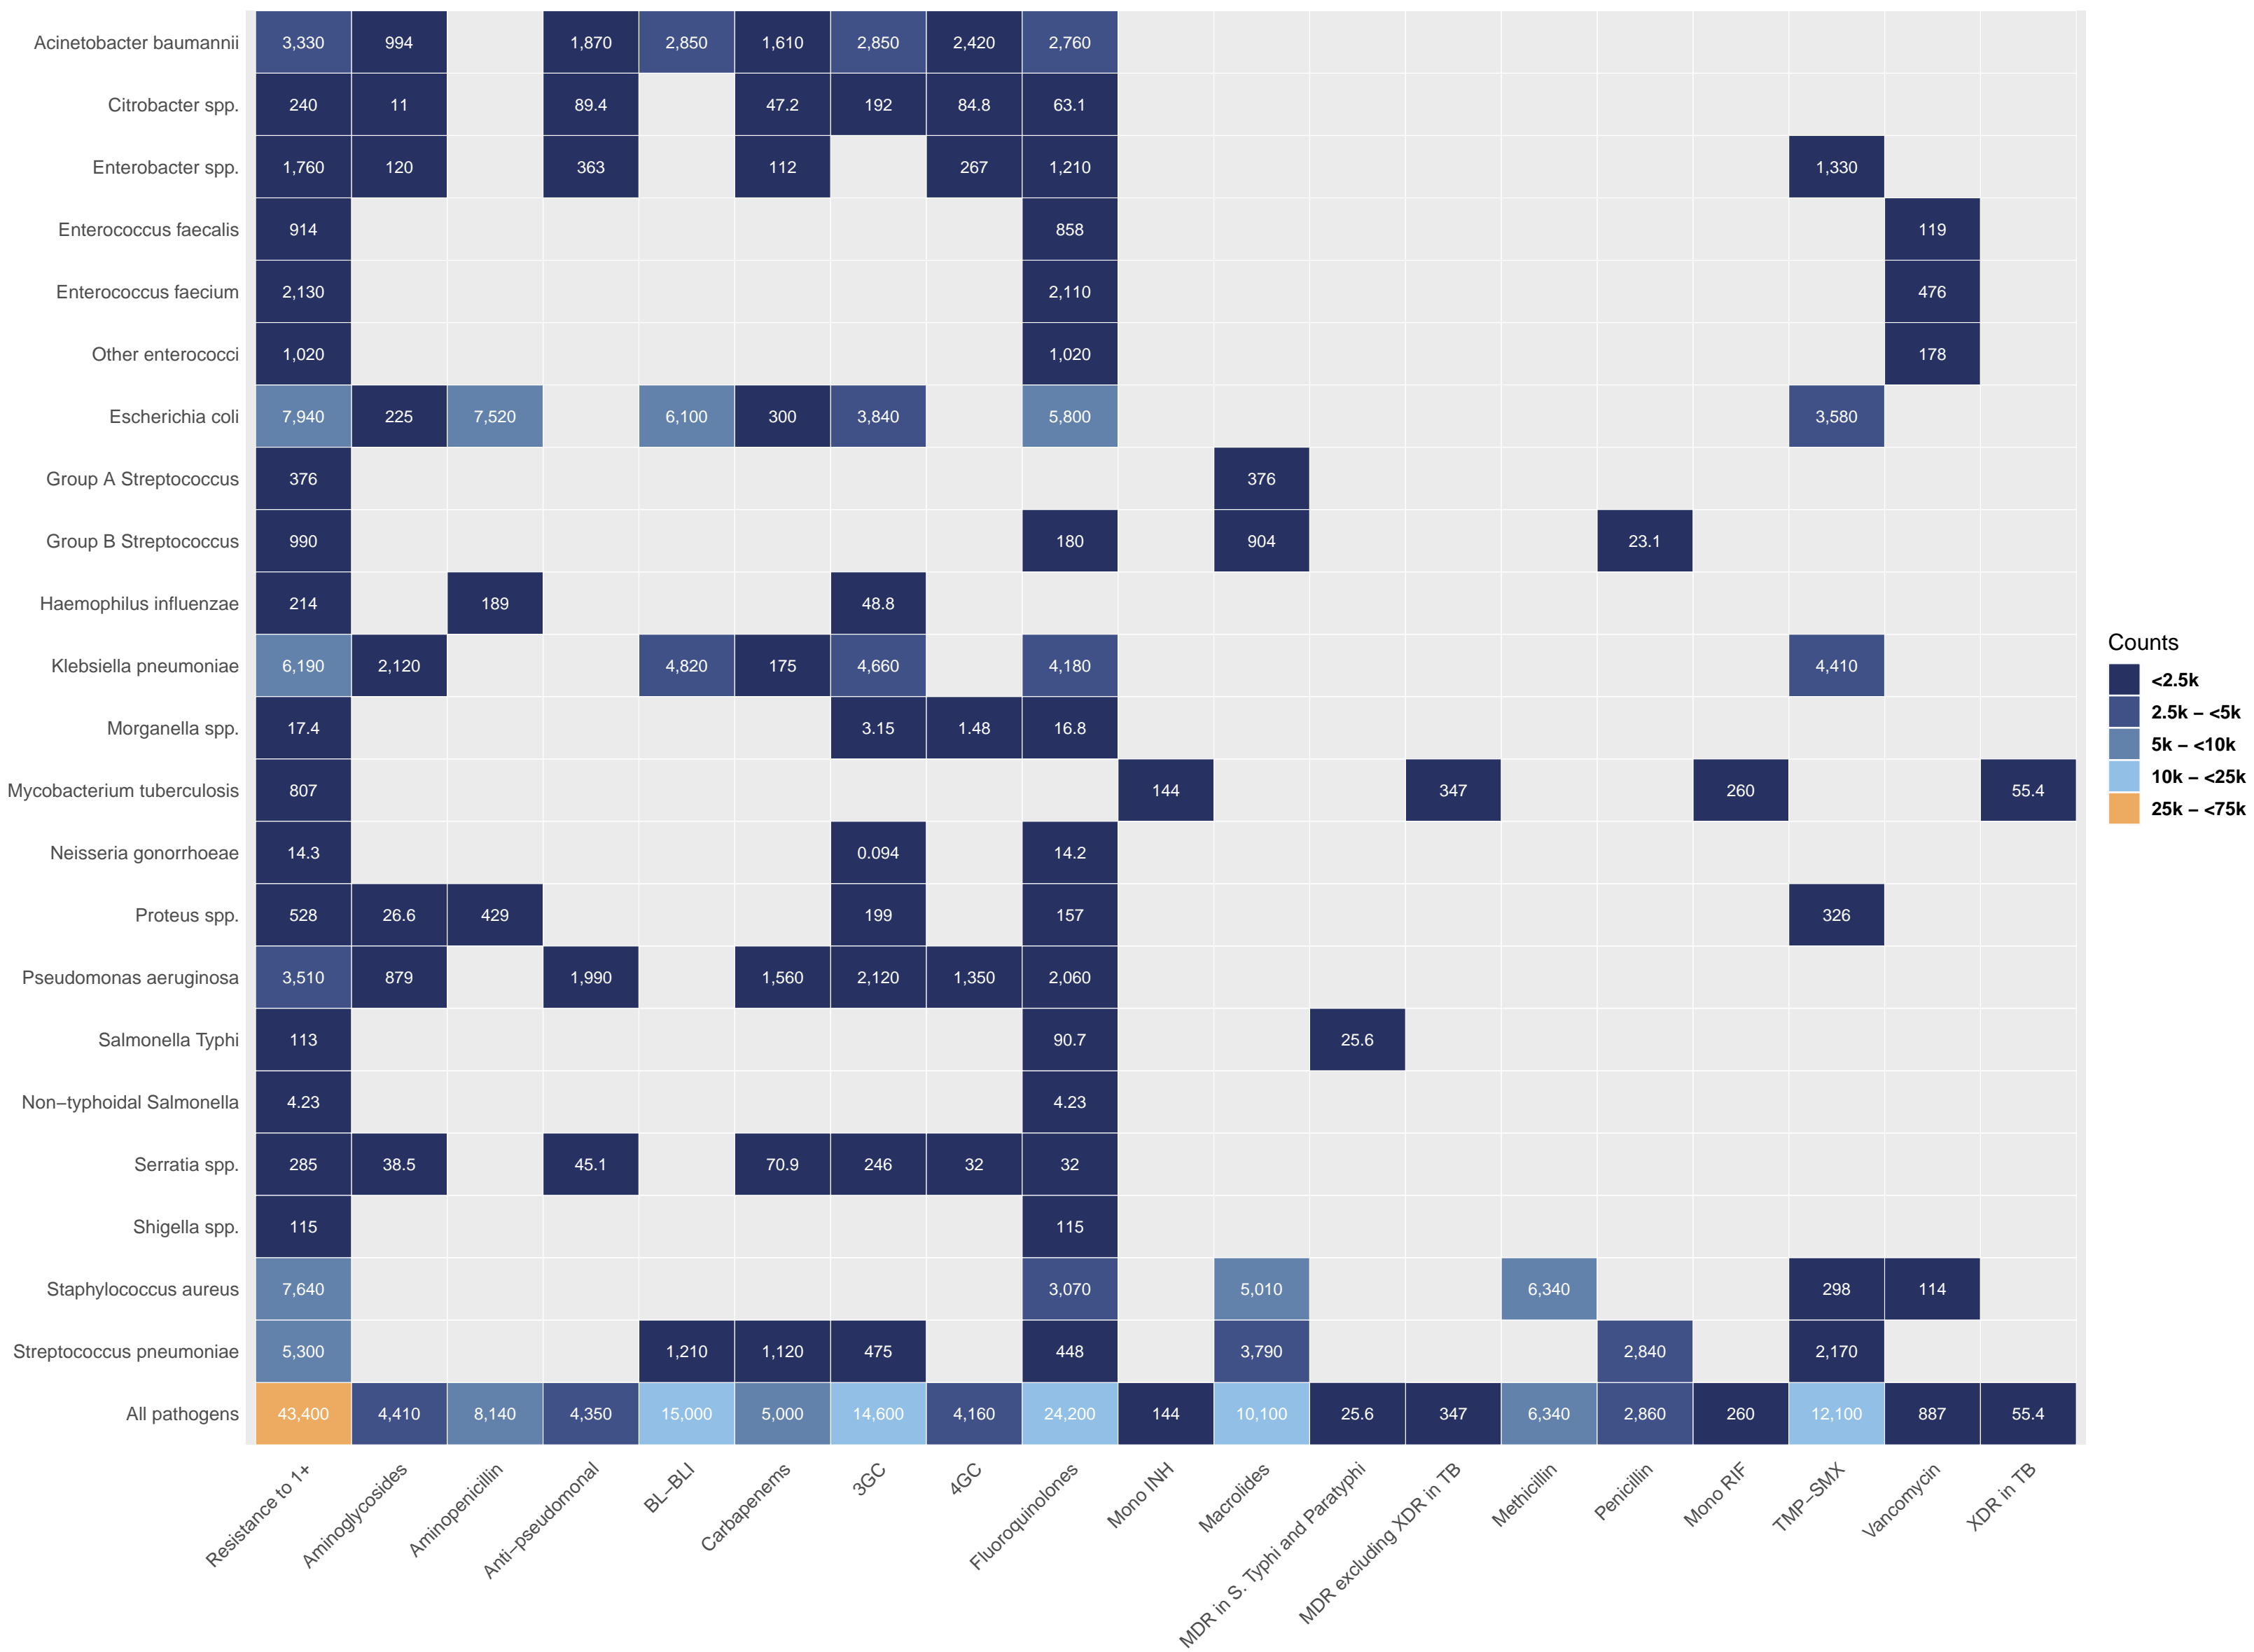

# Panama

DALYs (count) *attributable to bacterial antimicrobial resistance by pathogen–drug combinations, 2019*

|                            |                  |                 |                 |                  |        |             |       |       |                  |          |            |                               |                         |             |            |          |         |            |           |
|----------------------------|------------------|-----------------|-----------------|------------------|--------|-------------|-------|-------|------------------|----------|------------|-------------------------------|-------------------------|-------------|------------|----------|---------|------------|-----------|
| Acinetobacter baumannii    | 998              | 46.1            |                 | 71.5             | 39.9   | 264         | 145   | 56.8  | 375              |          |            |                               |                         |             |            |          |         |            |           |
| Citrobacter spp.           | 70.2             | 0.668           |                 | 19.1             |        | 12.4        | 20.4  | 7.87  | 9.77             |          |            |                               |                         |             |            |          |         |            |           |
| Enterobacter spp.          | 343              | 10              |                 | 33               |        | 22.9        |       | 10.2  | 180              |          |            |                               |                         |             |            |          | 86.6    |            |           |
| Enterococcus faecalis      | 249              |                 |                 |                  |        |             |       |       | 211              |          |            |                               |                         |             |            |          |         | 38.1       |           |
| Enterococcus faecium       | 529              |                 |                 |                  |        |             |       |       | 414              |          |            |                               |                         |             |            |          |         | 115        |           |
| Other enterococci          | 217              |                 |                 |                  |        |             |       |       | 187              |          |            |                               |                         |             |            |          |         | 29.9       |           |
| Escherichia coli           | 1,960            | 19.8            | 115             |                  | 326    | 67.2        | 527   |       | 709              |          |            |                               |                         |             |            |          |         | 197        |           |
| Group A Streptococcus      | 35.6             |                 |                 |                  |        |             |       |       |                  |          | 35.6       |                               |                         |             |            |          |         |            |           |
| Group B Streptococcus      | 129              |                 |                 |                  |        |             |       |       | 30.2             |          | 93.5       |                               |                         | 5.42        |            |          |         |            |           |
| Haemophilus influenzae     | 45               |                 | 30.6            |                  |        |             |       | 14.4  |                  |          |            |                               |                         |             |            |          |         |            |           |
| Klebsiella pneumoniae      | 1,570            | 163             |                 |                  | 109    | 67.5        | 691   |       | 308              |          |            |                               |                         |             |            |          |         | 227        |           |
| Morganella spp.            | 3.8              |                 |                 |                  |        |             | 0.415 | 0.234 | 3.15             |          |            |                               |                         |             |            |          |         |            |           |
| Mycobacterium tuberculosis | 318              |                 |                 |                  |        |             |       |       |                  | 21.7     |            |                               | 194                     |             |            | 69.3     |         |            | 32.7      |
| Neisseria gonorrhoeae      | 1.41             |                 |                 |                  |        |             | 0.031 |       | 1.38             |          |            |                               |                         |             |            |          |         |            |           |
| Proteus spp.               | 78.2             | 1.79            | 7.96            |                  |        |             | 43.6  |       | 11.1             |          |            |                               |                         |             |            |          |         | 13.8       |           |
| Pseudomonas aeruginosa     | 880              | 22.9            |                 | 223              |        | 271         | 108   | 20    | 236              |          |            |                               |                         |             |            |          |         |            |           |
| Salmonella Typhi           | 21.7             |                 |                 |                  |        |             |       |       | 18.5             |          |            | 3.25                          |                         |             |            |          |         |            |           |
| Non-typhoidal Salmonella   | 0.636            |                 |                 |                  |        |             |       |       | 0.636            |          |            |                               |                         |             |            |          |         |            |           |
| Serratia spp.              | 79.4             | 2.3             |                 | 11               |        | 20.2        | 39.4  | 2.91  | 3.53             |          |            |                               |                         |             |            |          |         |            |           |
| Shigella spp.              | 22               |                 |                 |                  |        |             |       |       | 22               |          |            |                               |                         |             |            |          |         |            |           |
| Staphylococcus aureus      | 2,130            |                 |                 |                  |        |             |       |       | 140              |          | 199        |                               |                         | 1,740       |            |          |         | 24.7       | 31.2      |
| Streptococcus pneumoniae   | 1,010            |                 |                 |                  | 52.9   | 267         | 25.5  |       | 61.8             |          | 171        |                               |                         |             | 256        |          |         | 175        |           |
| All pathogens              | 10,700           | 266             | 154             | 357              | 528    | 992         | 1,610 | 98    | 2,920            | 21.7     | 499        | 3.25                          | 194                     | 1,740       | 262        | 69.3     | 724     | 214        | 32.7      |
|                            | Resistance to 1+ | Aminoglycosides | Aminopenicillin | Anti-pseudomonal | BL-BLI | Carbapenems | 3GC   | 4GC   | Fluoroquinolones | Mono INH | Macrolides | MDR in S. Typhi and Paratyphi | MDR excluding XDR in TB | Methicillin | Penicillin | Mono RIF | TMP-SMX | Vancomycin | XDR in TB |

Counts

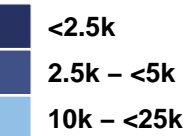



# Paraguay

DALYs (count) associated with bacterial antimicrobial resistance by pathogen–drug combinations, 2019

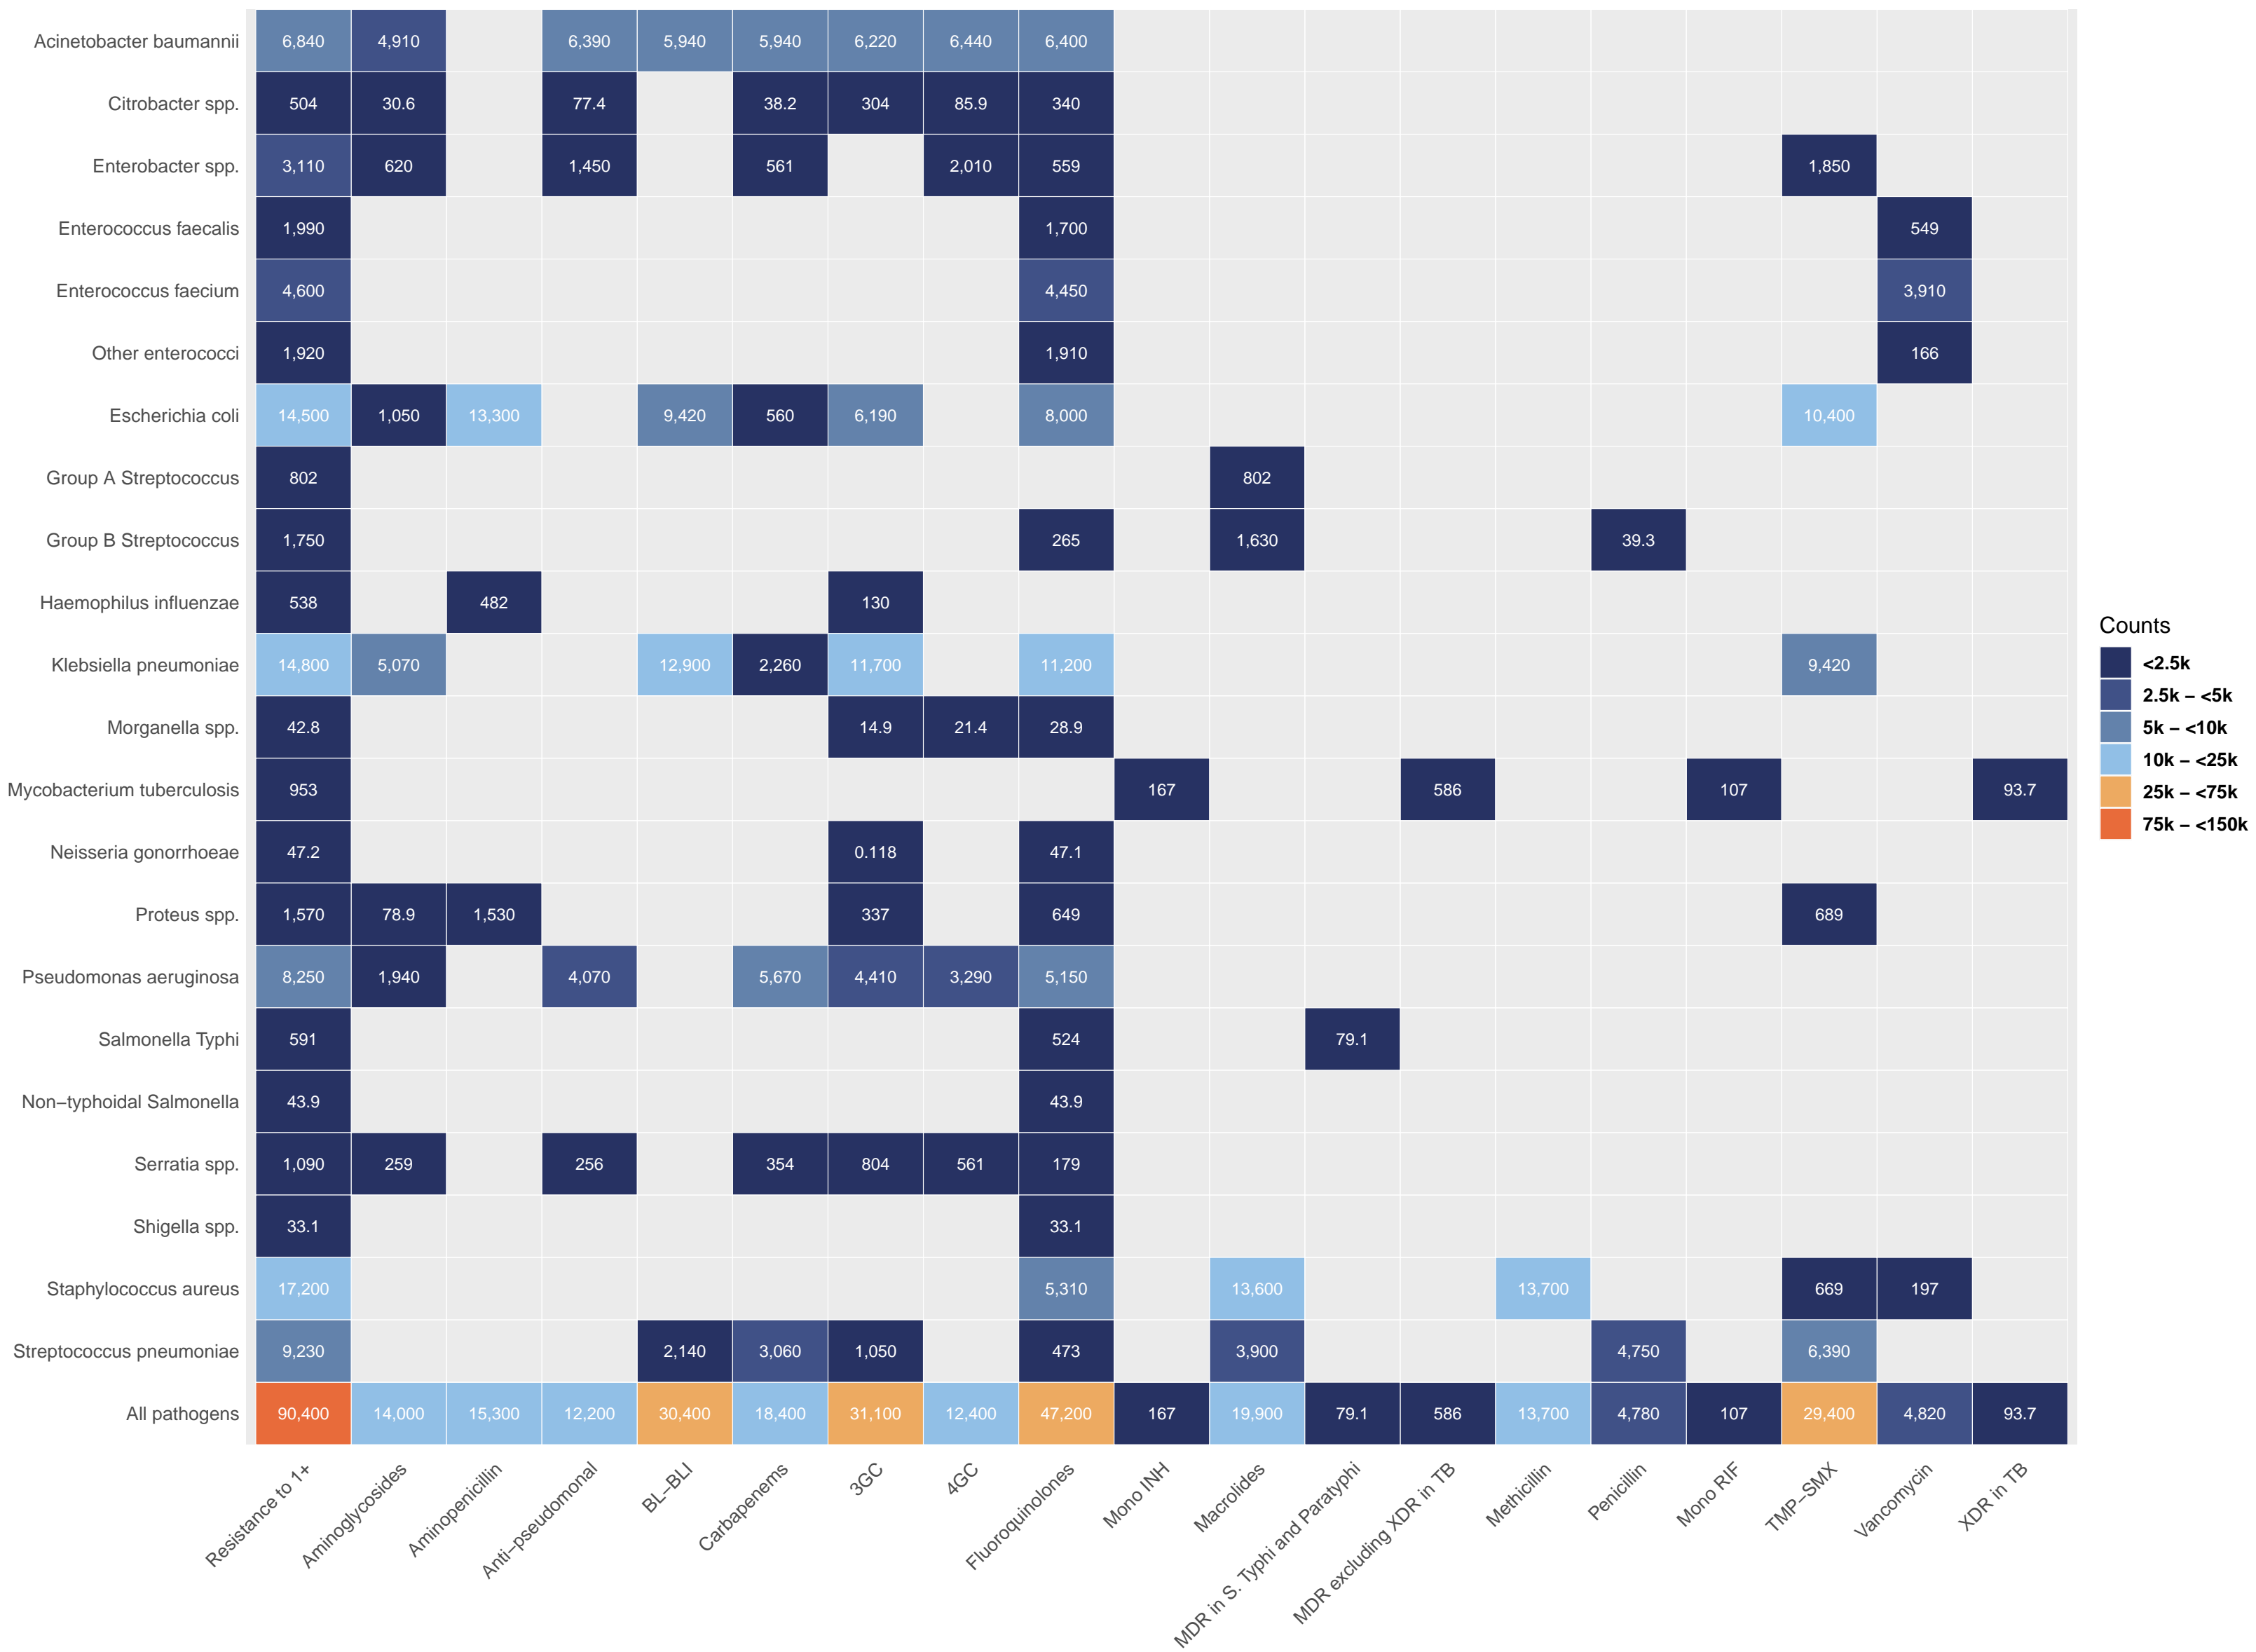

# Paraguay

DALYs (count) *attributable to bacterial antimicrobial resistance by pathogen–drug combinations, 2019*

|                            |                  |                 |                 |                  |        |             |       |      |                  |          |            |                               |                         |             |            |          |         |            |           |
|----------------------------|------------------|-----------------|-----------------|------------------|--------|-------------|-------|------|------------------|----------|------------|-------------------------------|-------------------------|-------------|------------|----------|---------|------------|-----------|
| Acinetobacter baumannii    | 2,170            | 205             |                 | 112              | 9.72   | 965         | 49.1  | 27.7 | 806              |          |            |                               |                         |             |            |          |         |            |           |
| Citrobacter spp.           | 139              | 1.91            |                 | 15.7             |        | 8.32        | 41.7  | 7.96 | 63.2             |          |            |                               |                         |             |            |          |         |            |           |
| Enterobacter spp.          | 685              | 39.9            |                 | 182              |        | 141         |       | 151  | 54.6             |          |            |                               |                         |             |            |          | 116     |            |           |
| Enterococcus faecalis      | 584              |                 |                 |                  |        |             |       |      | 403              |          |            |                               |                         |             |            |          |         | 181        |           |
| Enterococcus faecium       | 1,550            |                 |                 |                  |        |             |       |      | 604              |          |            |                               |                         |             |            |          |         | 947        |           |
| Other enterococci          | 394              |                 |                 |                  |        |             |       |      | 364              |          |            |                               |                         |             |            |          |         | 30.1       |           |
| Escherichia coli           | 3,410            | 70.1            | 290             |                  | 518    | 132         | 875   |      | 870              |          |            |                               |                         |             |            |          | 654     |            |           |
| Group A Streptococcus      | 76.4             |                 |                 |                  |        |             |       |      |                  |          | 76.4       |                               |                         |             |            |          |         |            |           |
| Group B Streptococcus      | 223              |                 |                 |                  |        |             |       |      | 43.8             |          | 170        |                               |                         | 8.93        |            |          |         |            |           |
| Haemophilus influenzae     | 114              |                 | 76.1            |                  |        |             | 37.4  |      |                  |          |            |                               |                         |             |            |          |         |            |           |
| Klebsiella pneumoniae      | 4,060            | 403             |                 |                  | 279    | 549         | 1,560 |      | 835              |          |            |                               |                         |             |            |          | 439     |            |           |
| Morganella spp.            | 10.1             |                 |                 |                  |        |             | 1.34  | 4.06 | 4.75             |          |            |                               |                         |             |            |          |         |            |           |
| Mycobacterium tuberculosis | 427              |                 |                 |                  |        |             |       |      |                  | 24.2     |            |                               | 320                     |             |            | 27.9     |         |            | 54.9      |
| Neisseria gonorrhoeae      | 4.62             |                 |                 |                  |        |             | 0.05  |      | 4.57             |          |            |                               |                         |             |            |          |         |            |           |
| Proteus spp.               | 192              | 4.62            | 36.5            |                  |        |             | 78.2  |      | 47.4             |          |            |                               |                         |             |            |          | 25.7    |            |           |
| Pseudomonas aeruginosa     | 2,040            | 47.1            |                 | 228              |        | 994         | 162   | 45.3 | 563              |          |            |                               |                         |             |            |          |         |            |           |
| Salmonella Typhi           | 117              |                 |                 |                  |        |             |       |      | 107              |          |            | 9.97                          |                         |             |            |          |         |            |           |
| Non-typhoidal Salmonella   | 7.55             |                 |                 |                  |        |             |       |      | 7.55             |          |            |                               |                         |             |            |          |         |            |           |
| Serratia spp.              | 298              | 14.9            |                 | 48.1             |        | 96.2        | 66.5  | 53.7 | 18.8             |          |            |                               |                         |             |            |          |         |            |           |
| Shigella spp.              | 5.93             |                 |                 |                  |        |             |       |      | 5.93             |          |            |                               |                         |             |            |          |         |            |           |
| Staphylococcus aureus      | 4,620            |                 |                 |                  |        |             |       |      | 241              |          | 535        |                               | 3,750                   |             |            |          | 52.6    | 50.7       |           |
| Streptococcus pneumoniae   | 1,940            |                 |                 |                  | 64.3   | 704         | 23.7  |      | 59.1             |          | 158        |                               |                         | 351         |            |          | 579     |            |           |
| All pathogens              | 23,100           | 787             | 402             | 585              | 870    | 3,590       | 2,890 | 290  | 5,100            | 24.2     | 940        | 9.97                          | 320                     | 3,750       | 360        | 27.9     | 1,870   | 1,210      | 54.9      |
|                            | Resistance to 1+ | Aminoglycosides | Aminopenicillin | Anti-pseudomonal | BL-BLI | Carbapenems | 3GC   | 4GC  | Fluoroquinolones | Mono INH | Macrolides | MDR in S. Typhi and Paratyphi | MDR excluding XDR in TB | Methicillin | Penicillin | Mono RIF | TMP-SMX | Vancomycin | XDR in TB |



# Peru

DALYs (count) associated with bacterial antimicrobial resistance by pathogen–drug combinations, 2019

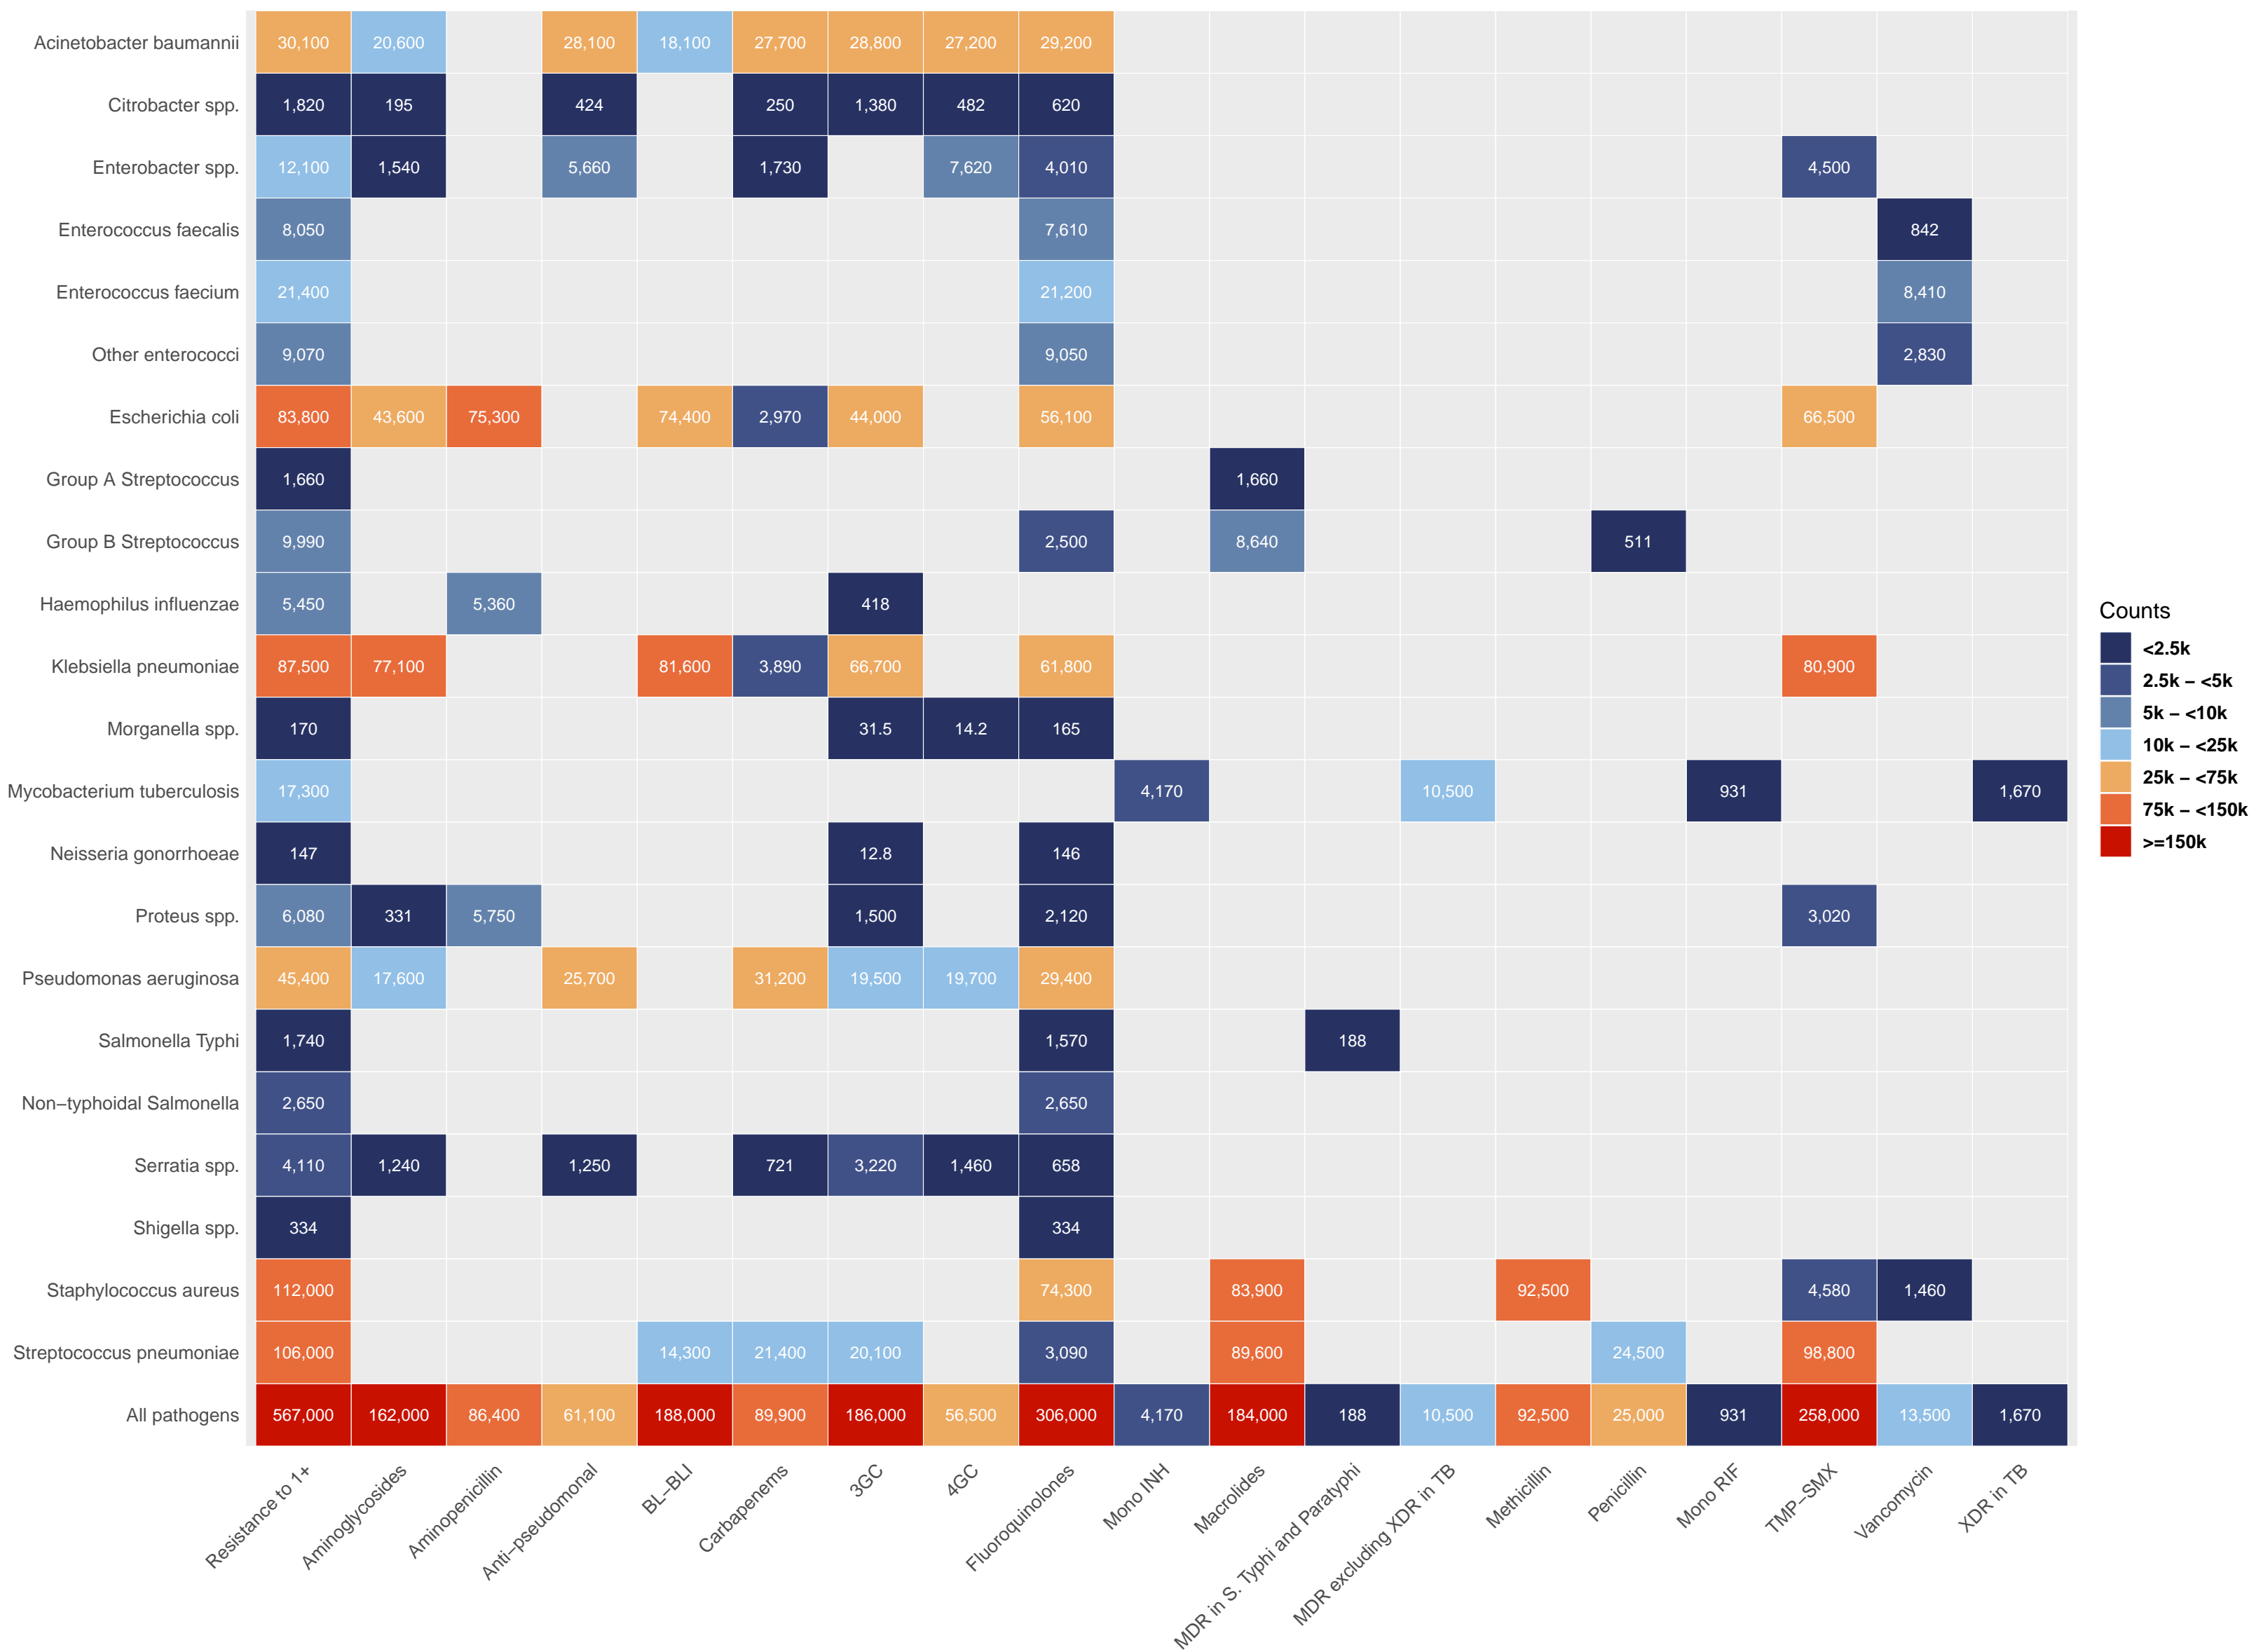

# Peru

DALYs (count) attributable to bacterial antimicrobial resistance by pathogen–drug combinations, 2019

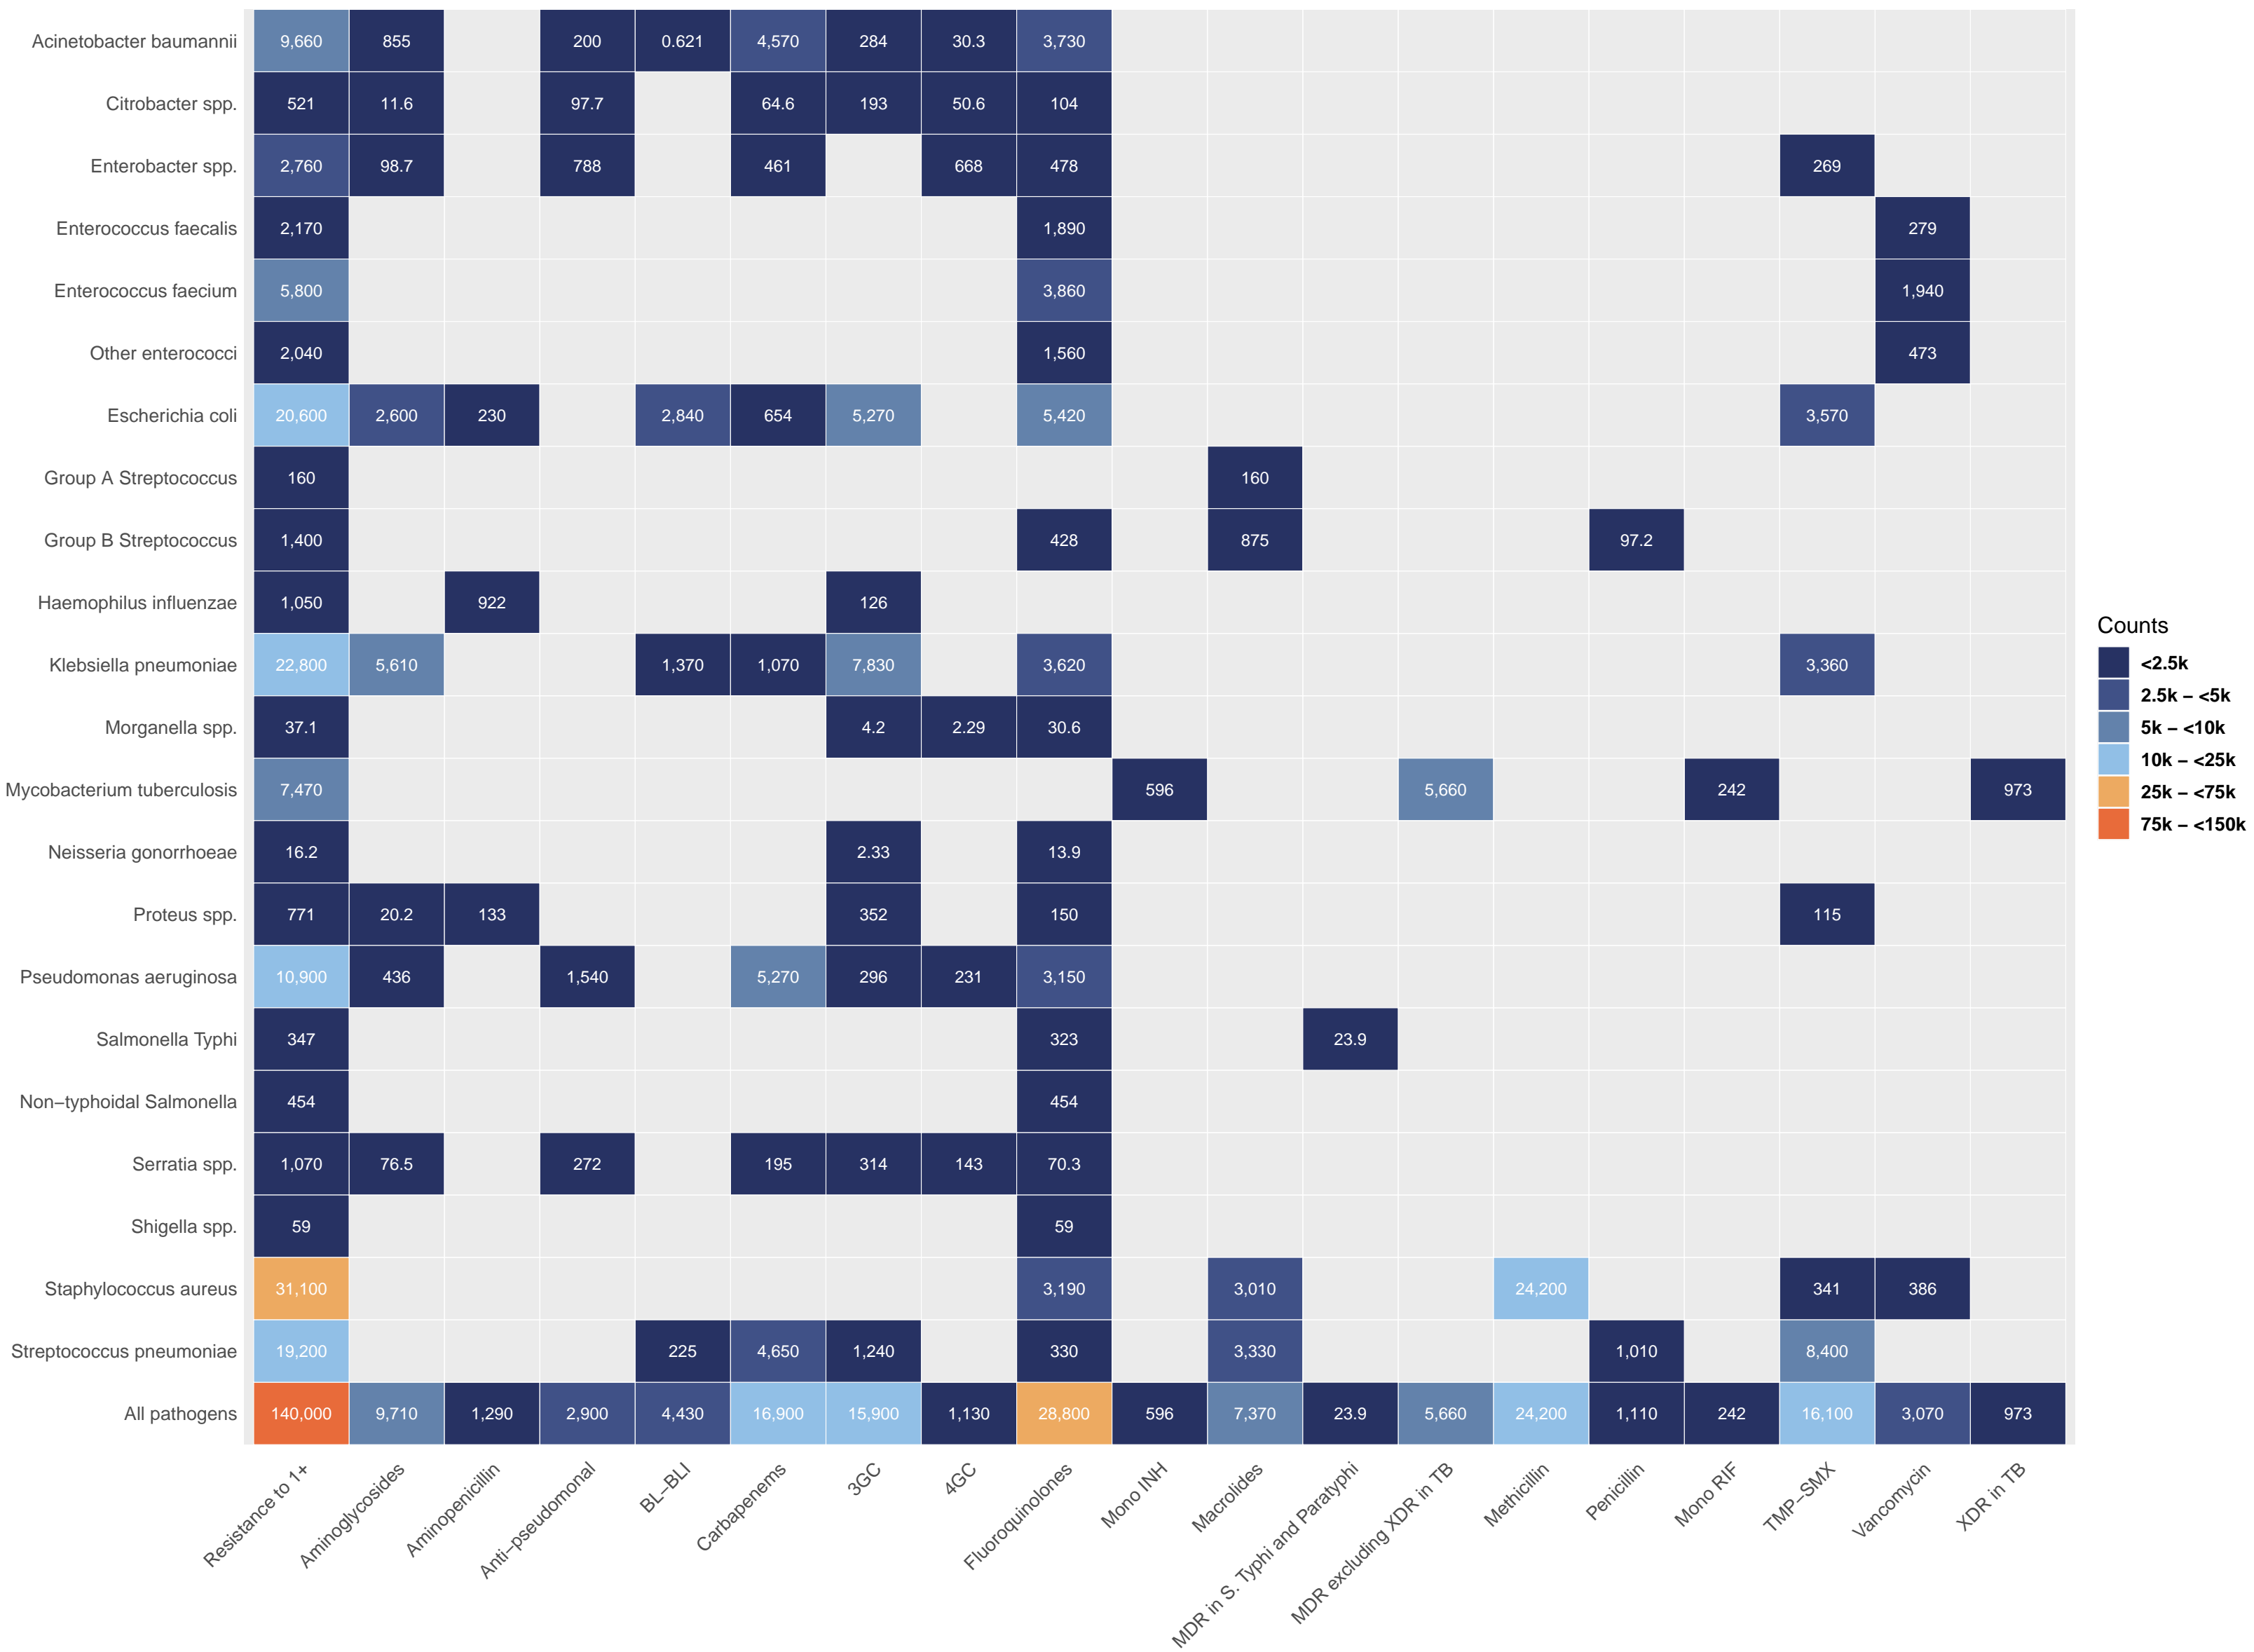

# Saint Kitts and Nevis

DALYs (count) associated with bacterial antimicrobial resistance by pathogen–drug combinations, 2019

|                            |                  |                 |                 |                  |        |             |       |       |                  |          |            |                               |                         |             |            |          |         |            |           |
|----------------------------|------------------|-----------------|-----------------|------------------|--------|-------------|-------|-------|------------------|----------|------------|-------------------------------|-------------------------|-------------|------------|----------|---------|------------|-----------|
| Acinetobacter baumannii    | 175              | 123             |                 | 153              | 142    | 156         | 167   | 165   | 172              |          |            |                               |                         |             |            |          |         |            |           |
| Citrobacter spp.           | 7.62             | 0.648           |                 | 1.45             |        | 1.76        | 5.21  | 2.19  | 2.95             |          |            |                               |                         |             |            |          |         |            |           |
| Enterobacter spp.          | 56.4             | 8.27            |                 | 19.2             |        | 13.6        |       | 24.1  | 27.1             |          |            |                               |                         |             |            |          | 32.8    |            |           |
| Enterococcus faecalis      | 20.1             |                 |                 |                  |        |             |       |       | 18.3             |          |            |                               |                         |             |            |          |         | 3.44       |           |
| Enterococcus faecium       | 48.9             |                 |                 |                  |        |             |       |       | 48.5             |          |            |                               |                         |             |            |          |         | 15.5       |           |
| Other enterococci          | 26.3             |                 |                 |                  |        |             |       |       | 26.2             |          |            |                               |                         |             |            |          |         | 5.67       |           |
| Escherichia coli           | 164              | 14.5            | 153             |                  | 118    | 9.29        | 89.1  |       | 108              |          |            |                               |                         |             |            |          | 106     |            |           |
| Group A Streptococcus      | 10.8             |                 |                 |                  |        |             |       |       |                  |          | 10.8       |                               |                         |             |            |          |         |            |           |
| Group B Streptococcus      | 13.3             |                 |                 |                  |        |             |       |       | 1.9              |          | 12.4       |                               |                         | 0.423       |            |          |         |            |           |
| Haemophilus influenzae     | 3.01             |                 | 2.54            |                  |        |             | 0.835 |       |                  |          |            |                               |                         |             |            |          |         |            |           |
| Klebsiella pneumoniae      | 105              | 23.7            |                 |                  | 84.4   | 11.8        | 72    |       | 62               |          |            |                               |                         |             |            |          | 76      |            |           |
| Morganella spp.            | 0.607            |                 |                 |                  |        |             | 0.141 | 0.083 | 0.562            |          |            |                               |                         |             |            |          |         |            |           |
| Mycobacterium tuberculosis | 0.762            |                 |                 |                  |        |             |       |       |                  | 0.191    |            |                               | 0.409                   |             |            | 0.098    |         |            | 0.064     |
| Neisseria gonorrhoeae      | 0.581            |                 |                 |                  |        |             | 0.004 |       | 0.58             |          |            |                               |                         |             |            |          |         |            |           |
| Proteus spp.               | 18.7             | 0.62            | 16.9            |                  |        |             | 3.16  |       | 9.47             |          |            |                               |                         |             |            |          | 10.2    |            |           |
| Pseudomonas aeruginosa     | 84               | 24.9            |                 | 42               |        | 64.4        | 39    | 30.7  | 46.9             |          |            |                               |                         |             |            |          |         |            |           |
| Salmonella Typhi           | 1.27             |                 |                 |                  |        |             |       |       | 1.04             |          |            | 0.297                         |                         |             |            |          |         |            |           |
| Non-typhoidal Salmonella   | 0.478            |                 |                 |                  |        |             |       |       | 0.478            |          |            |                               |                         |             |            |          |         |            |           |
| Serratia spp.              | 9.19             | 2.24            |                 | 1.93             |        | 1.83        | 6.91  | 3.87  | 1.81             |          |            |                               |                         |             |            |          |         |            |           |
| Shigella spp.              | 0.237            |                 |                 |                  |        |             |       |       | 0.237            |          |            |                               |                         |             |            |          |         |            |           |
| Staphylococcus aureus      | 150              |                 |                 |                  |        |             |       |       | 38.8             |          | 100        |                               |                         | 131         |            |          | 6.75    | 2.83       |           |
| Streptococcus pneumoniae   | 115              |                 |                 |                  | 22.5   | 48.6        | 24.4  |       | 4.04             |          | 87.4       |                               |                         | 41.5        |            |          | 74.3    |            |           |
| All pathogens              | 1,010            | 198             | 173             | 218              | 367    | 307         | 407   | 226   | 571              | 0.191    | 211        | 0.297                         | 0.409                   | 131         | 41.9       | 0.098    | 306     | 27.4       | 0.064     |
|                            | Resistance to 1+ | Aminoglycosides | Aminopenicillin | Anti-pseudomonal | BL-BLI | Carbapenems | 3GC   | 4GC   | Fluoroquinolones | Mono INH | Macrolides | MDR in S. Typhi and Paratyphi | MDR excluding XDR in TB | Methicillin | Penicillin | Mono RIF | TMP-SMX | Vancomycin | XDR in TB |

Counts  
  <2.5k

# Saint Kitts and Nevis

DALYs (count) *attributable to bacterial antimicrobial resistance by pathogen–drug combinations, 2019*

|                            |                  |                 |                 |                  |        |             |       |       |                  |          |            |                               |                         |             |            |          |         |            |           |
|----------------------------|------------------|-----------------|-----------------|------------------|--------|-------------|-------|-------|------------------|----------|------------|-------------------------------|-------------------------|-------------|------------|----------|---------|------------|-----------|
| Acinetobacter baumannii    | 56               | 5.14            |                 | 1.14             | 0.05   | 25.5        | 1.42  | 0.814 | 21.9             |          |            |                               |                         |             |            |          |         |            |           |
| Citrobacter spp.           | 2.2              | 0.037           |                 | 0.297            |        | 0.461       | 0.701 | 0.206 | 0.501            |          |            |                               |                         |             |            |          |         |            |           |
| Enterobacter spp.          | 12.8             | 0.524           |                 | 2                |        | 3.39        |       | 1.33  | 3.47             |          |            |                               |                         |             |            |          | 2.09    |            |           |
| Enterococcus faecalis      | 5.61             |                 |                 |                  |        |             |       |       | 4.47             |          |            |                               |                         |             |            |          |         | 1.13       |           |
| Enterococcus faecium       | 12.7             |                 |                 |                  |        |             |       |       | 9.12             |          |            |                               |                         |             |            |          |         | 3.62       |           |
| Other enterococci          | 5.72             |                 |                 |                  |        |             |       |       | 4.75             |          |            |                               |                         |             |            |          |         | 0.966      |           |
| Escherichia coli           | 41.1             | 0.92            | 2.28            |                  | 5.31   | 2.03        | 12.4  |       | 12.1             |          |            |                               |                         |             |            |          | 6.04    |            |           |
| Group A Streptococcus      | 1.03             |                 |                 |                  |        |             |       |       |                  |          | 1.03       |                               |                         |             |            |          |         |            |           |
| Group B Streptococcus      | 1.7              |                 |                 |                  |        |             |       |       | 0.319            |          | 1.29       |                               |                         | 0.091       |            |          |         |            |           |
| Haemophilus influenzae     | 0.648            |                 | 0.403           |                  |        |             |       | 0.245 |                  |          |            |                               |                         |             |            |          |         |            |           |
| Klebsiella pneumoniae      | 26.8             | 2.03            |                 |                  | 2.56   | 3.12        | 10.3  |       | 4.64             |          |            |                               |                         |             |            |          | 4.2     |            |           |
| Morganella spp.            | 0.136            |                 |                 |                  |        |             |       | 0.018 | 0.014            | 0.104    |            |                               |                         |             |            |          |         |            |           |
| Mycobacterium tuberculosis | 0.29             |                 |                 |                  |        |             |       |       |                  | 0.026    |            |                               | 0.205                   |             |            | 0.024    |         |            | 0.036     |
| Neisseria gonorrhoeae      | 0.058            |                 |                 |                  |        |             |       | 0.001 |                  | 0.057    |            |                               |                         |             |            |          |         |            |           |
| Proteus spp.               | 2.27             | 0.042           | 0.399           |                  |        |             |       | 0.732 |                  | 0.722    |            |                               |                         |             |            |          |         | 0.38       |           |
| Pseudomonas aeruginosa     | 20.5             | 0.622           |                 | 1.98             |        | 11.6        | 1.07  | 0.287 | 4.94             |          |            |                               |                         |             |            |          |         |            |           |
| Salmonella Typhi           | 0.245            |                 |                 |                  |        |             |       |       | 0.209            |          |            | 0.036                         |                         |             |            |          |         |            |           |
| Non-typhoidal Salmonella   | 0.075            |                 |                 |                  |        |             |       |       | 0.075            |          |            |                               |                         |             |            |          |         |            |           |
| Serratia spp.              | 2.42             | 0.135           |                 | 0.425            |        | 0.501       | 0.726 | 0.436 | 0.197            |          |            |                               |                         |             |            |          |         |            |           |
| Shigella spp.              | 0.04             |                 |                 |                  |        |             |       |       | 0.04             |          |            |                               |                         |             |            |          |         |            |           |
| Staphylococcus aureus      | 43.7             |                 |                 |                  |        |             |       |       | 1.86             |          | 3.85       |                               |                         | 36.8        |            |          | 0.536   | 0.696      |           |
| Streptococcus pneumoniae   | 23.6             |                 |                 |                  | 0.229  | 10.9        | 0.419 |       | 0.449            |          | 3.69       |                               |                         | 1.62        |            |          | 6.27    |            |           |
| All pathogens              | 260              | 9.45            | 3.09            | 5.84             | 8.15   | 57.6        | 28    | 3.09  | 69.9             | 0.026    | 9.86       | 0.036                         | 0.205                   | 36.8        | 1.71       | 0.024    | 19.5    | 6.41       | 0.036     |
|                            | Resistance to 1+ | Aminoglycosides | Aminopenicillin | Anti-pseudomonal | BL-BLI | Carbapenems | 3GC   | 4GC   | Fluoroquinolones | Mono INH | Macrolides | MDR in S. Typhi and Paratyphi | MDR excluding XDR in TB | Methicillin | Penicillin | Mono RIF | TMP-SMX | Vancomycin | XDR in TB |

Counts

<2.5k

# Saint Lucia

DALYs (count) associated with bacterial antimicrobial resistance by pathogen–drug combinations, 2019

|                            |                  |                 |                 |                  |        |             |       |       |                  |          |            |                               |                         |             |            |          |         |            |           |
|----------------------------|------------------|-----------------|-----------------|------------------|--------|-------------|-------|-------|------------------|----------|------------|-------------------------------|-------------------------|-------------|------------|----------|---------|------------|-----------|
| Acinetobacter baumannii    | 464              | 301             |                 | 400              | 391    | 385         | 418   | 407   | 405              |          |            |                               |                         |             |            |          |         |            |           |
| Citrobacter spp.           | 21.3             | 1.75            |                 | 5.33             |        | 3.74        | 14.7  | 8.61  | 7.8              |          |            |                               |                         |             |            |          |         |            |           |
| Enterobacter spp.          | 158              | 23.9            |                 | 58               |        | 31.8        |       | 83.5  | 63.3             |          |            |                               |                         |             |            |          | 95.7    |            |           |
| Enterococcus faecalis      | 56.5             |                 |                 |                  |        |             |       |       | 51.9             |          |            |                               |                         |             |            |          |         | 9.86       |           |
| Enterococcus faecium       | 115              |                 |                 |                  |        |             |       |       | 114              |          |            |                               |                         |             |            |          |         | 34.3       |           |
| Other enterococci          | 76.8             |                 |                 |                  |        |             |       |       | 76.7             |          |            |                               |                         |             |            |          |         | 17.7       |           |
| Escherichia coli           | 404              | 47.3            | 373             |                  | 319    | 24.3        | 238   |       | 267              |          |            |                               |                         |             |            |          | 260     |            |           |
| Group A Streptococcus      | 28.7             |                 |                 |                  |        |             |       |       |                  |          | 28.7       |                               |                         |             |            |          |         |            |           |
| Group B Streptococcus      | 46.4             |                 |                 |                  |        |             |       |       | 8.71             |          | 41.6       |                               |                         | 3.27        |            |          |         |            |           |
| Haemophilus influenzae     | 7.44             |                 | 5.77            |                  |        |             | 2.66  |       |                  |          |            |                               |                         |             |            |          |         |            |           |
| Klebsiella pneumoniae      | 301              | 83.4            |                 |                  | 246    | 24.8        | 223   |       | 157              |          |            |                               |                         |             |            |          | 225     |            |           |
| Morganella spp.            | 1.75             |                 |                 |                  |        |             | 0.381 | 0.251 | 1.63             |          |            |                               |                         |             |            |          |         |            |           |
| Mycobacterium tuberculosis | 2.48             |                 |                 |                  |        |             |       |       |                  | 0.651    |            |                               | 1.42                    |             |            | 0.181    |         |            | 0.228     |
| Neisseria gonorrhoeae      | 1.62             |                 |                 |                  |        |             | 0.012 |       | 1.61             |          |            |                               |                         |             |            |          |         |            |           |
| Proteus spp.               | 45.3             | 1.93            | 41.1            |                  |        |             | 8.15  |       | 12.8             |          |            |                               |                         |             |            |          | 27.1    |            |           |
| Pseudomonas aeruginosa     | 189              | 51.3            |                 | 89               |        | 129         | 104   | 79.4  | 90.5             |          |            |                               |                         |             |            |          |         |            |           |
| Salmonella Typhi           | 4.28             |                 |                 |                  |        |             |       |       | 3.63             |          |            | 0.751                         |                         |             |            |          |         |            |           |
| Non-typhoidal Salmonella   | 0.456            |                 |                 |                  |        |             |       |       | 0.456            |          |            |                               |                         |             |            |          |         |            |           |
| Serratia spp.              | 26.2             | 5.8             |                 | 5.81             |        | 6.45        | 17.6  | 8.63  | 9.56             |          |            |                               |                         |             |            |          |         |            |           |
| Shigella spp.              | 0.107            |                 |                 |                  |        |             |       |       | 0.107            |          |            |                               |                         |             |            |          |         |            |           |
| Staphylococcus aureus      | 369              |                 |                 |                  |        |             |       |       | 129              |          | 199        |                               |                         | 349         |            |          | 26.1    | 11.5       |           |
| Streptococcus pneumoniae   | 291              |                 |                 |                  | 68.2   | 85.9        | 53.8  |       | 13.1             |          | 188        |                               |                         | 145         |            |          | 197     |            |           |
| All pathogens              | 2,610            | 517             | 420             | 558              | 1,020  | 691         | 1,080 | 587   | 1,410            | 0.651    | 457        | 0.751                         | 1.42                    | 349         | 148        | 0.181    | 831     | 73.5       | 0.228     |
|                            | Resistance to 1+ | Aminoglycosides | Aminopenicillin | Anti-pseudomonal | BL-BLI | Carbapenems | 3GC   | 4GC   | Fluoroquinolones | Mono INH | Macrolides | MDR in S. Typhi and Paratyphi | MDR excluding XDR in TB | Methicillin | Penicillin | Mono RIF | TMP-SMX | Vancomycin | XDR in TB |

Counts  
 <2.5k  
 2.5k – <5k

# Saint Lucia

DALYs (count) *attributable to bacterial antimicrobial resistance by pathogen–drug combinations, 2019*

|                            |                  |                 |                 |                  |        |             |       |       |                  |          |            |                               |                         |             |            |          |         |            |           |
|----------------------------|------------------|-----------------|-----------------|------------------|--------|-------------|-------|-------|------------------|----------|------------|-------------------------------|-------------------------|-------------|------------|----------|---------|------------|-----------|
| Acinetobacter baumannii    | 146              | 12.6            |                 | 7.3              | 1.84   | 62.8        | 8.25  | 2.54  | 50.5             |          |            |                               |                         |             |            |          |         |            |           |
| Citrobacter spp.           | 6.07             | 0.096           |                 | 1.1              |        | 0.955       | 1.69  | 0.95  | 1.28             |          |            |                               |                         |             |            |          |         |            |           |
| Enterobacter spp.          | 35               | 1.49            |                 | 6.5              |        | 7.74        |       | 5.78  | 7.49             |          |            |                               |                         |             |            |          | 6.03    |            |           |
| Enterococcus faecalis      | 15.8             |                 |                 |                  |        |             |       |       | 12.6             |          |            |                               |                         |             |            |          |         | 3.15       |           |
| Enterococcus faecium       | 29.5             |                 |                 |                  |        |             |       |       | 21.5             |          |            |                               |                         |             |            |          |         | 8.02       |           |
| Other enterococci          | 16.8             |                 |                 |                  |        |             |       |       | 13.8             |          |            |                               |                         |             |            |          |         | 2.98       |           |
| Escherichia coli           | 103              | 2.86            | 3.5             |                  | 13.3   | 5.26        | 33.8  |       | 29.3             |          |            |                               |                         |             |            |          | 14.7    |            |           |
| Group A Streptococcus      | 2.76             |                 |                 |                  |        |             |       |       |                  | 2.76     |            |                               |                         |             |            |          |         |            |           |
| Group B Streptococcus      | 6.3              |                 |                 |                  |        |             |       |       | 1.47             | 4.23     |            |                               | 0.597                   |             |            |          |         |            |           |
| Haemophilus influenzae     | 1.67             |                 | 0.892           |                  |        |             | 0.78  |       |                  |          |            |                               |                         |             |            |          |         |            |           |
| Klebsiella pneumoniae      | 77.3             | 6.79            |                 |                  | 6.4    | 6.8         | 33.8  |       | 11.2             |          |            |                               |                         |             |            |          | 12.4    |            |           |
| Morganella spp.            | 0.391            |                 |                 |                  |        |             | 0.047 | 0.042 | 0.302            |          |            |                               |                         |             |            |          |         |            |           |
| Mycobacterium tuberculosis | 1.06             |                 |                 |                  |        |             |       |       | 0.094            |          |            | 0.786                         |                         |             | 0.047      |          |         |            | 0.133     |
| Neisseria gonorrhoeae      | 0.159            |                 |                 |                  |        |             | 0.003 |       | 0.156            |          |            |                               |                         |             |            |          |         |            |           |
| Proteus spp.               | 5.16             | 0.132           | 0.998           |                  |        |             | 2     |       | 0.91             |          |            |                               |                         |             |            |          | 1.12    |            |           |
| Pseudomonas aeruginosa     | 47.4             | 1.37            |                 | 5.9              |        | 24.2        | 4.74  | 1.55  | 9.62             |          |            |                               |                         |             |            |          |         |            |           |
| Salmonella Typhi           | 0.839            |                 |                 |                  |        |             |       |       | 0.743            |          | 0.095      |                               |                         |             |            |          |         |            |           |
| Non-typhoidal Salmonella   | 0.08             |                 |                 |                  |        |             |       |       | 0.08             |          |            |                               |                         |             |            |          |         |            |           |
| Serratia spp.              | 6.79             | 0.333           |                 | 1.15             |        | 1.72        | 1.72  | 0.764 | 1.1              |          |            |                               |                         |             |            |          |         |            |           |
| Shigella spp.              | 0.017            |                 |                 |                  |        |             |       |       | 0.017            |          |            |                               |                         |             |            |          |         |            |           |
| Staphylococcus aureus      | 115              |                 |                 |                  |        |             |       |       | 5.87             | 7.12     |            |                               | 97.4                    |             |            |          | 2.01    | 2.54       |           |
| Streptococcus pneumoniae   | 58.5             |                 |                 |                  | 1.8    | 18.9        | 2.27  |       | 1.51             | 7.68     |            |                               |                         | 9.7         |            |          | 16.7    |            |           |
| All pathogens              | 675              | 25.7            | 5.39            | 22               | 23.3   | 128         | 89    | 11.6  | 170              | 0.094    | 21.8       | 0.095                         | 0.786                   | 97.4        | 10.3       | 0.047    | 52.9    | 16.7       | 0.133     |
|                            | Resistance to 1+ | Aminoglycosides | Aminopenicillin | Anti-pseudomonal | BL-BLI | Carbapenems | 3GC   | 4GC   | Fluoroquinolones | Mono INH | Macrolides | MDR in S. Typhi and Paratyphi | MDR excluding XDR in TB | Methicillin | Penicillin | Mono RIF | TMP-SMX | Vancomycin | XDR in TB |

Counts  
  <2.5k



# Saint Vincent and the Grenadines

DALYs (count) associated with bacterial antimicrobial resistance by pathogen–drug combinations, 2019

|                            |                  |                 |                 |                  |        |             |       |       |                  |          |            |                               |                         |             |            |          |         |            |           |
|----------------------------|------------------|-----------------|-----------------|------------------|--------|-------------|-------|-------|------------------|----------|------------|-------------------------------|-------------------------|-------------|------------|----------|---------|------------|-----------|
| Acinetobacter baumannii    | 341              | 218             |                 | 309              | 258    | 268         | 282   | 295   | 300              |          |            |                               |                         |             |            |          |         |            |           |
| Citrobacter spp.           | 20.1             | 1.91            |                 | 4.92             |        | 3.36        | 13.5  | 9.67  | 7.92             |          |            |                               |                         |             |            |          |         |            |           |
| Enterobacter spp.          | 134              | 23.3            |                 | 39.6             |        | 28.6        |       | 72.3  | 70.1             |          |            |                               |                         |             |            |          | 88.1    |            |           |
| Enterococcus faecalis      | 45.3             |                 |                 |                  |        |             |       |       | 42.5             |          |            |                               |                         |             |            |          |         | 6.81       |           |
| Enterococcus faecium       | 77.4             |                 |                 |                  |        |             |       |       | 76.7             |          |            |                               |                         |             |            |          |         | 23.9       |           |
| Other enterococci          | 56.8             |                 |                 |                  |        |             |       |       | 56.8             |          |            |                               |                         |             |            |          |         | 2.96       |           |
| Escherichia coli           | 292              | 66.7            | 279             |                  | 221    | 30          | 153   |       | 180              |          |            |                               |                         |             |            |          |         | 187        |           |
| Group A Streptococcus      | 22.1             |                 |                 |                  |        |             |       |       |                  |          | 22.1       |                               |                         |             |            |          |         |            |           |
| Group B Streptococcus      | 36.3             |                 |                 |                  |        |             |       |       | 11               |          | 29.9       |                               |                         | 2.25        |            |          |         |            |           |
| Haemophilus influenzae     | 4.52             |                 | 2.76            |                  |        |             | 2.38  |       |                  |          |            |                               |                         |             |            |          |         |            |           |
| Klebsiella pneumoniae      | 248              | 92.4            |                 |                  | 208    | 21          | 185   |       | 161              |          |            |                               |                         |             |            |          |         | 189        |           |
| Morganella spp.            | 1.47             |                 |                 |                  |        |             | 0.286 | 0.286 | 1.35             |          |            |                               |                         |             |            |          |         |            |           |
| Mycobacterium tuberculosis | 1.69             |                 |                 |                  |        |             |       |       |                  | 0.349    |            |                               | 1.06                    |             |            | 0.12     |         |            | 0.166     |
| Neisseria gonorrhoeae      | 1.03             |                 |                 |                  |        |             | 0.007 |       | 1.02             |          |            |                               |                         |             |            |          |         |            |           |
| Proteus spp.               | 35.2             | 1.38            | 32.2            |                  |        |             | 6.59  |       | 13.8             |          |            |                               |                         |             |            |          |         | 20.2       |           |
| Pseudomonas aeruginosa     | 143              | 63.2            |                 | 59.6             |        | 92.3        | 70.9  | 53.4  | 75.4             |          |            |                               |                         |             |            |          |         |            |           |
| Salmonella Typhi           | 5.91             |                 |                 |                  |        |             |       |       | 4.71             |          |            | 1.42                          |                         |             |            |          |         |            |           |
| Non-typhoidal Salmonella   | 0.618            |                 |                 |                  |        |             |       |       | 0.618            |          |            |                               |                         |             |            |          |         |            |           |
| Serratia spp.              | 21.5             | 7.1             |                 | 5.13             |        | 5.31        | 13.9  | 7.03  | 6.16             |          |            |                               |                         |             |            |          |         |            |           |
| Shigella spp.              | 0.208            |                 |                 |                  |        |             |       |       | 0.208            |          |            |                               |                         |             |            |          |         |            |           |
| Staphylococcus aureus      | 275              |                 |                 |                  |        |             |       |       | 95.1             |          | 177        |                               | 248                     |             |            |          |         | 39.2       | 5.4       |
| Streptococcus pneumoniae   | 228              |                 |                 |                  | 46.4   | 57.7        | 58.7  |       | 17.3             |          | 134        |                               |                         | 97.6        |            |          |         | 166        |           |
| All pathogens              | 1,990            | 474             | 314             | 418              | 734    | 506         | 786   | 438   | 1,120            | 0.349    | 363        | 1.42                          | 1.06                    | 248         | 99.8       | 0.12     | 689     | 39.1       | 0.166     |
|                            | Resistance to 1+ | Aminoglycosides | Aminopenicillin | Anti-pseudomonal | BL-BLI | Carbapenems | 3GC   | 4GC   | Fluoroquinolones | Mono INH | Macrolides | MDR in S. Typhi and Paratyphi | MDR excluding XDR in TB | Methicillin | Penicillin | Mono RIF | TMP-SMX | Vancomycin | XDR in TB |

Counts  
  <2.5k

# Saint Vincent and the Grenadines

DALYs (count) *attributable to bacterial antimicrobial resistance by pathogen–drug combinations, 2019*

|                            |                  |                 |                 |                  |        |             |      |       |                  |          |            |                               |                         |             |            |          |         |            |           |
|----------------------------|------------------|-----------------|-----------------|------------------|--------|-------------|------|-------|------------------|----------|------------|-------------------------------|-------------------------|-------------|------------|----------|---------|------------|-----------|
| Acinetobacter baumannii    | 107              | 9.26            |                 | 9.67             | 0.748  | 43.3        | 4.46 | 1.27  | 37.9             |          |            |                               |                         |             |            |          |         |            |           |
| Citrobacter spp.           | 5.71             | 0.1             |                 | 0.974            |        | 0.829       | 1.4  | 1.12  | 1.28             |          |            |                               |                         |             |            |          |         |            |           |
| Enterobacter spp.          | 30.3             | 1.38            |                 | 3.66             |        | 6.47        |      | 4.94  | 8.56             |          |            |                               |                         |             |            |          | 5.28    |            |           |
| Enterococcus faecalis      | 12.5             |                 |                 |                  |        |             |      |       | 10.4             |          |            |                               |                         |             |            |          |         | 2.11       |           |
| Enterococcus faecium       | 20               |                 |                 |                  |        |             |      |       | 14.5             |          |            |                               |                         |             |            |          |         | 5.57       |           |
| Other enterococci          | 11.6             |                 |                 |                  |        |             |      |       | 11               |          |            |                               |                         |             |            |          |         | 0.547      |           |
| Escherichia coli           | 73.6             | 3.92            | 3.97            |                  | 10.1   | 6.42        | 19.9 |       | 18.9             |          |            |                               |                         |             |            |          |         | 10.5       |           |
| Group A Streptococcus      | 2.12             |                 |                 |                  |        |             |      |       |                  |          | 2.12       |                               |                         |             |            |          |         |            |           |
| Group B Streptococcus      | 5.31             |                 |                 |                  |        |             |      |       | 1.92             |          | 2.98       |                               |                         | 0.413       |            |          |         |            |           |
| Haemophilus influenzae     | 1.1              |                 | 0.401           |                  |        |             |      | 0.702 |                  |          |            |                               |                         |             |            |          |         |            |           |
| Klebsiella pneumoniae      | 64.2             | 7.02            |                 |                  | 5.05   | 5.58        | 25.6 |       | 11.3             |          |            |                               |                         |             |            |          |         | 9.56       |           |
| Morganella spp.            | 0.327            |                 |                 |                  |        |             |      | 0.03  | 0.046            | 0.25     |            |                               |                         |             |            |          |         |            |           |
| Mycobacterium tuberculosis | 0.758            |                 |                 |                  |        |             |      |       |                  | 0.05     |            |                               | 0.58                    |             |            | 0.031    |         |            | 0.096     |
| Neisseria gonorrhoeae      | 0.101            |                 |                 |                  |        |             |      | 0.002 |                  | 0.099    |            |                               |                         |             |            |          |         |            |           |
| Proteus spp.               | 4.21             | 0.092           | 0.763           |                  |        |             |      | 1.56  |                  | 1        |            |                               |                         |             |            |          |         | 0.789      |           |
| Pseudomonas aeruginosa     | 34.1             | 1.73            |                 | 3.56             |        | 16.5        | 3.3  | 1.05  | 8.03             |          |            |                               |                         |             |            |          |         |            |           |
| Salmonella Typhi           | 1.13             |                 |                 |                  |        |             |      |       | 0.958            |          |            | 0.176                         |                         |             |            |          |         |            |           |
| Non-typhoidal Salmonella   | 0.114            |                 |                 |                  |        |             |      |       | 0.114            |          |            |                               |                         |             |            |          |         |            |           |
| Serratia spp.              | 5.43             | 0.428           |                 | 1.01             |        | 1.43        | 1.27 | 0.609 | 0.685            |          |            |                               |                         |             |            |          |         |            |           |
| Shigella spp.              | 0.037            |                 |                 |                  |        |             |      |       | 0.037            |          |            |                               |                         |             |            |          |         |            |           |
| Staphylococcus aureus      | 82.4             |                 |                 |                  |        |             |      |       | 4.19             |          | 6.37       |                               |                         | 67.5        |            |          |         | 3.12       | 1.19      |
| Streptococcus pneumoniae   | 45.6             |                 |                 |                  | 0.918  | 12.5        | 4.35 |       | 2.06             |          | 5.4        |                               |                         | 5.85        |            |          |         | 14.5       |           |
| All pathogens              | 507              | 23.9            | 5.13            | 18.9             | 16.9   | 93          | 62.6 | 9.04  | 133              | 0.05     | 16.9       | 0.176                         | 0.58                    | 67.5        | 6.27       | 0.031    | 43.7    | 9.42       | 0.096     |
|                            | Resistance to 1+ | Aminoglycosides | Aminopenicillin | Anti-pseudomonal | BL-BLI | Carbapenems | 3GC  | 4GC   | Fluoroquinolones | Mono INH | Macrolides | MDR in S. Typhi and Paratyphi | MDR excluding XDR in TB | Methicillin | Penicillin | Mono RIF | TMP-SMX | Vancomycin | XDR in TB |

Counts

<2.5k

# Suriname

DALYs (count) associated with bacterial antimicrobial resistance by pathogen–drug combinations, 2019

|                            |                  |                 |                 |                  |        |             |       |       |                  |          |            |                               |                         |             |            |          |         |            |           |
|----------------------------|------------------|-----------------|-----------------|------------------|--------|-------------|-------|-------|------------------|----------|------------|-------------------------------|-------------------------|-------------|------------|----------|---------|------------|-----------|
| Acinetobacter baumannii    | 1,670            | 1,100           |                 | 1,580            | 1,250  | 1,280       | 1,360 | 1,460 | 1,480            |          |            |                               |                         |             |            |          |         |            |           |
| Citrobacter spp.           | 144              | 18.1            |                 | 40.3             |        | 23.3        | 94.9  | 72.9  | 61.9             |          |            |                               |                         |             |            |          |         |            |           |
| Enterobacter spp.          | 856              | 164             |                 | 298              |        | 199         |       | 467   | 443              |          |            |                               |                         |             |            |          | 580     |            |           |
| Enterococcus faecalis      | 295              |                 |                 |                  |        |             |       |       | 282              |          |            |                               |                         |             |            |          |         | 35.9       |           |
| Enterococcus faecium       | 441              |                 |                 |                  |        |             |       |       | 437              |          |            |                               |                         |             |            |          |         | 139        |           |
| Other enterococci          | 322              |                 |                 |                  |        |             |       |       | 322              |          |            |                               |                         |             |            |          |         | 19.4       |           |
| Escherichia coli           | 1,730            | 402             | 1,670           |                  | 1,380  | 179         | 778   |       | 866              |          |            |                               |                         |             |            |          | 1,190   |            |           |
| Group A Streptococcus      | 118              |                 |                 |                  |        |             |       |       |                  |          | 118        |                               |                         |             |            |          |         |            |           |
| Group B Streptococcus      | 273              |                 |                 |                  |        |             |       |       | 113              |          | 206        |                               |                         |             | 15.6       |          |         |            |           |
| Haemophilus influenzae     | 32               |                 | 18.8            |                  |        |             |       | 17.6  |                  |          |            |                               |                         |             |            |          |         |            |           |
| Klebsiella pneumoniae      | 1,600            | 630             |                 |                  | 1,390  | 144         | 1,170 |       | 984              |          |            |                               |                         |             |            |          | 1,270   |            |           |
| Morganella spp.            | 8.31             |                 |                 |                  |        |             | 1.5   | 1.69  | 7.68             |          |            |                               |                         |             |            |          |         |            |           |
| Mycobacterium tuberculosis | 5.8              |                 |                 |                  |        |             |       |       |                  | 1.44     |            |                               | 3.28                    |             |            | 0.558    |         |            | 0.516     |
| Neisseria gonorrhoeae      | 5.74             |                 |                 |                  |        |             |       | 0.038 | 5.72             |          |            |                               |                         |             |            |          |         |            |           |
| Proteus spp.               | 210              | 15.9            | 193             |                  |        |             |       | 40.6  | 77.7             |          |            |                               |                         |             |            |          |         | 134        |           |
| Pseudomonas aeruginosa     | 854              | 418             |                 | 363              |        | 544         | 418   | 297   | 466              |          |            |                               |                         |             |            |          |         |            |           |
| Salmonella Typhi           | 58.8             |                 |                 |                  |        |             |       |       | 47.1             |          |            | 14.3                          |                         |             |            |          |         |            |           |
| Non-typhoidal Salmonella   | 5.2              |                 |                 |                  |        |             |       |       | 5.2              |          |            |                               |                         |             |            |          |         |            |           |
| Serratia spp.              | 158              | 59.6            |                 | 47.8             |        | 41.4        | 101   | 56.6  | 41.2             |          |            |                               |                         |             |            |          |         |            |           |
| Shigella spp.              | 1.53             |                 |                 |                  |        |             |       |       | 1.53             |          |            |                               |                         |             |            |          |         |            |           |
| Staphylococcus aureus      | 1,580            |                 |                 |                  |        |             |       |       | 573              |          | 1,030      |                               |                         | 1,370       |            |          |         | 423        | 23.5      |
| Streptococcus pneumoniae   | 1,450            |                 |                 |                  | 273    | 331         | 384   |       | 113              |          | 836        |                               |                         |             | 699        |          |         | 1,070      |           |
| All pathogens              | 11,800           | 2,810           | 1,880           | 2,330            | 4,300  | 2,740       | 4,360 | 2,350 | 6,330            | 1.44     | 2,190      | 14.3                          | 3.28                    | 1,370       | 714        | 0.558    | 4,670   | 218        | 0.516     |
|                            | Resistance to 1+ | Aminoglycosides | Aminopenicillin | Anti-pseudomonal | BL-BLI | Carbapenems | 3GC   | 4GC   | Fluoroquinolones | Mono INH | Macrolides | MDR in S. Typhi and Paratyphi | MDR excluding XDR in TB | Methicillin | Penicillin | Mono RIF | TMP-SMX | Vancomycin | XDR in TB |

Counts

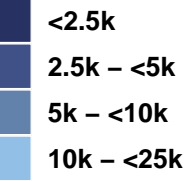

# Suriname

DALYs (count) *attributable to bacterial antimicrobial resistance by pathogen–drug combinations, 2019*

|                            |                  |                 |                 |                  |        |             |       |      |                  |          |            |                               |                         |             |            |          |         |            |           |
|----------------------------|------------------|-----------------|-----------------|------------------|--------|-------------|-------|------|------------------|----------|------------|-------------------------------|-------------------------|-------------|------------|----------|---------|------------|-----------|
| Acinetobacter baumannii    | 523              | 46.7            |                 | 62.4             | 1.61   | 207         | 13.7  | 2.88 | 189              |          |            |                               |                         |             |            |          |         |            |           |
| Citrobacter spp.           | 40.6             | 0.948           |                 | 7.58             |        | 5.54        | 8.66  | 8.11 | 9.79             |          |            |                               |                         |             |            |          |         |            |           |
| Enterobacter spp.          | 196              | 9.56            |                 | 27.5             |        | 44.6        |       | 28.2 | 52               |          |            |                               |                         |             |            |          | 34.2    |            |           |
| Enterococcus faecalis      | 80.2             |                 |                 |                  |        |             |       |      | 69.4             |          |            |                               |                         |             |            |          |         | 10.7       |           |
| Enterococcus faecium       | 115              |                 |                 |                  |        |             |       |      | 82.4             |          |            |                               |                         |             |            |          |         | 32.2       |           |
| Other enterococci          | 65.7             |                 |                 |                  |        |             |       |      | 62.2             |          |            |                               |                         |             |            |          |         | 3.51       |           |
| Escherichia coli           | 421              | 24.6            | 23.2            |                  | 73.3   | 39.8        | 102   |      | 87.1             |          |            |                               |                         |             |            |          | 71.1    |            |           |
| Group A Streptococcus      | 11.3             |                 |                 |                  |        |             |       |      |                  |          | 11.3       |                               |                         |             |            |          |         |            |           |
| Group B Streptococcus      | 42.7             |                 |                 |                  |        |             |       |      | 19.9             |          | 19.9       |                               |                         | 2.82        |            |          |         |            |           |
| Haemophilus influenzae     | 7.87             |                 | 2.68            |                  |        |             | 5.19  |      |                  |          |            |                               |                         |             |            |          |         |            |           |
| Klebsiella pneumoniae      | 412              | 47.4            |                 |                  | 36.6   | 36.9        | 160   |      | 66.9             |          |            |                               |                         |             |            |          | 64.4    |            |           |
| Morganella spp.            | 1.85             |                 |                 |                  |        |             | 0.153 | 0.27 | 1.42             |          |            |                               |                         |             |            |          |         |            |           |
| Mycobacterium tuberculosis | 2.41             |                 |                 |                  |        |             |       |      |                  | 0.207    |            |                               | 1.75                    |             |            | 0.145    |         |            | 0.298     |
| Neisseria gonorrhoeae      | 0.562            |                 |                 |                  |        |             | 0.011 |      | 0.551            |          |            |                               |                         |             |            |          |         |            |           |
| Proteus spp.               | 25.4             | 0.903           | 4.41            |                  |        |             | 9.43  |      | 5.39             |          |            |                               |                         |             |            |          | 5.24    |            |           |
| Pseudomonas aeruginosa     | 202              | 11.4            |                 | 21.5             |        | 95          | 19.1  | 4.9  | 49.6             |          |            |                               |                         |             |            |          |         |            |           |
| Salmonella Typhi           | 11.4             |                 |                 |                  |        |             |       |      | 9.7              |          |            | 1.73                          |                         |             |            |          |         |            |           |
| Non-typhoidal Salmonella   | 1                |                 |                 |                  |        |             |       |      | 1                |          |            |                               |                         |             |            |          |         |            |           |
| Serratia spp.              | 39.6             | 3.57            |                 | 8.95             |        | 11          | 7.26  | 4.42 | 4.41             |          |            |                               |                         |             |            |          |         |            |           |
| Shigella spp.              | 0.29             |                 |                 |                  |        |             |       |      | 0.29             |          |            |                               |                         |             |            |          |         |            |           |
| Staphylococcus aureus      | 463              |                 |                 |                  |        |             |       |      | 24.3             |          | 36         |                               |                         | 362         |            |          | 35      | 5.58       |           |
| Streptococcus pneumoniae   | 293              |                 |                 |                  | 5.09   | 71.4        | 31.3  |      | 13.1             |          | 33.3       |                               |                         | 45.8        |            |          | 92.8    |            |           |
| All pathogens              | 2,950            | 145             | 30.3            | 128              | 117    | 511         | 357   | 48.8 | 748              | 0.207    | 100        | 1.73                          | 1.75                    | 362         | 48.6       | 0.145    | 303     | 52         | 0.298     |
|                            | Resistance to 1+ | Aminoglycosides | Aminopenicillin | Anti-pseudomonal | BL-BLI | Carbapenems | 3GC   | 4GC  | Fluoroquinolones | Mono INH | Macrolides | MDR in S. Typhi and Paratyphi | MDR excluding XDR in TB | Methicillin | Penicillin | Mono RIF | TMP-SMX | Vancomycin | XDR in TB |

Counts  
 <2.5k  
 2.5k – <5k

# The Bahamas

DALYs (count) associated with bacterial antimicrobial resistance by pathogen–drug combinations, 2019

|                            |                  |                 |                 |                  |        |             |       |      |                  |          |            |                               |                         |             |            |          |         |            |           |
|----------------------------|------------------|-----------------|-----------------|------------------|--------|-------------|-------|------|------------------|----------|------------|-------------------------------|-------------------------|-------------|------------|----------|---------|------------|-----------|
| Acinetobacter baumannii    | 516              | 389             |                 | 491              | 436    | 452         | 493   | 454  | 513              |          |            |                               |                         |             |            |          |         |            |           |
| Citrobacter spp.           | 27.7             | 5.28            |                 | 5.56             |        | 9.94        | 17.6  | 11   | 10.6             |          |            |                               |                         |             |            |          |         |            |           |
| Enterobacter spp.          | 186              | 39.3            |                 | 76.8             |        | 50          |       | 93.4 | 71.4             |          |            |                               |                         |             |            |          | 120     |            |           |
| Enterococcus faecalis      | 139              |                 |                 |                  |        |             |       |      | 126              |          |            |                               |                         |             |            |          |         | 26.4       |           |
| Enterococcus faecium       | 296              |                 |                 |                  |        |             |       |      | 293              |          |            |                               |                         |             |            |          |         | 136        |           |
| Other enterococci          | 126              |                 |                 |                  |        |             |       |      | 126              |          |            |                               |                         |             |            |          |         | 10.1       |           |
| Escherichia coli           | 1,020            | 135             | 966             |                  | 816    | 83.9        | 480   |      | 583              |          |            |                               |                         |             |            |          | 703     |            |           |
| Group A Streptococcus      | 35.4             |                 |                 |                  |        |             |       |      |                  |          | 35.4       |                               |                         |             |            |          |         |            |           |
| Group B Streptococcus      | 109              |                 |                 |                  |        |             |       |      | 29.3             |          | 93         |                               |                         | 4.2         |            |          |         |            |           |
| Haemophilus influenzae     | 15.1             |                 | 7.25            |                  |        |             | 10.1  |      |                  |          |            |                               |                         |             |            |          |         |            |           |
| Klebsiella pneumoniae      | 881              | 239             |                 |                  | 789    | 90.6        | 518   |      | 556              |          |            |                               |                         |             |            |          | 715     |            |           |
| Morganella spp.            | 4.04             |                 |                 |                  |        |             | 0.902 | 1.13 | 3.54             |          |            |                               |                         |             |            |          |         |            |           |
| Mycobacterium tuberculosis | 34               |                 |                 |                  |        |             |       |      |                  | 0.442    |            |                               | 9.35                    |             |            | 22.7     |         |            | 1.49      |
| Neisseria gonorrhoeae      | 3.12             |                 |                 |                  |        |             | 0.023 |      | 3.11             |          |            |                               |                         |             |            |          |         |            |           |
| Proteus spp.               | 120              | 27.1            | 112             |                  |        |             | 23.9  |      | 59.5             |          |            |                               |                         |             |            |          | 73.9    |            |           |
| Pseudomonas aeruginosa     | 513              | 185             |                 | 221              |        | 387         | 220   | 193  | 315              |          |            |                               |                         |             |            |          |         |            |           |
| Salmonella Typhi           | 29.3             |                 |                 |                  |        |             |       |      | 24.2             |          |            | 6.33                          |                         |             |            |          |         |            |           |
| Non-typhoidal Salmonella   | 1.66             |                 |                 |                  |        |             |       |      | 1.66             |          |            |                               |                         |             |            |          |         |            |           |
| Serratia spp.              | 51.6             | 14.9            |                 | 14.5             |        | 13.6        | 33.8  | 25.7 | 11               |          |            |                               |                         |             |            |          |         |            |           |
| Shigella spp.              | 0.724            |                 |                 |                  |        |             |       |      | 0.724            |          |            |                               |                         |             |            |          |         |            |           |
| Staphylococcus aureus      | 1,070            |                 |                 |                  |        |             |       |      | 675              |          | 777        |                               |                         | 601         |            |          | 253     | 15         |           |
| Streptococcus pneumoniae   | 654              |                 |                 |                  | 133    | 262         | 128   |      | 25.5             |          | 466        |                               |                         | 194         |            |          | 476     |            |           |
| All pathogens              | 5,830            | 1,030           | 1,090           | 809              | 2,170  | 1,350       | 1,930 | 777  | 3,430            | 0.442    | 1,370      | 6.33                          | 9.35                    | 601         | 198        | 22.7     | 2,340   | 188        | 1.49      |
|                            | Resistance to 1+ | Aminoglycosides | Aminopenicillin | Anti-pseudomonal | BL-BLI | Carbapenems | 3GC   | 4GC  | Fluoroquinolones | Mono INH | Macrolides | MDR in S. Typhi and Paratyphi | MDR excluding XDR in TB | Methicillin | Penicillin | Mono RIF | TMP-SMX | Vancomycin | XDR in TB |

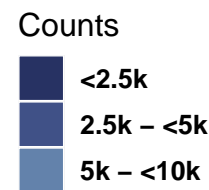

# The Bahamas

DALYs (count) *attributable* to bacterial antimicrobial resistance by pathogen–drug combinations, 2019

|                            |                  |                 |                 |                  |        |             |       |       |                  |          |            |                               |                         |             |            |          |         |            |           |
|----------------------------|------------------|-----------------|-----------------|------------------|--------|-------------|-------|-------|------------------|----------|------------|-------------------------------|-------------------------|-------------|------------|----------|---------|------------|-----------|
| Acinetobacter baumannii    | 165              | 16.1            |                 | 7.03             | 0.193  | 73.1        | 2.95  | 0.244 | 65.8             |          |            |                               |                         |             |            |          |         |            |           |
| Citrobacter spp.           | 8.13             | 0.304           |                 | 0.884            |        | 2.56        | 1.87  | 0.897 | 1.62             |          |            |                               |                         |             |            |          |         |            |           |
| Enterobacter spp.          | 42.4             | 2.41            |                 | 7.83             |        | 12.1        |       | 4.81  | 7.91             |          |            |                               |                         |             |            |          | 7.31    |            |           |
| Enterococcus faecalis      | 39.1             |                 |                 |                  |        |             |       |       | 30.7             |          |            |                               |                         |             |            |          |         | 8.42       |           |
| Enterococcus faecium       | 82.7             |                 |                 |                  |        |             |       |       | 51.4             |          |            |                               |                         |             |            |          |         | 31.3       |           |
| Other enterococci          | 26               |                 |                 |                  |        |             |       |       | 24.2             |          |            |                               |                         |             |            |          |         | 1.86       |           |
| Escherichia coli           | 250              | 8.21            | 11.6            |                  | 42.3   | 18.7        | 64.7  |       | 62               |          |            |                               |                         |             |            |          |         | 42.4       |           |
| Group A Streptococcus      | 3.4              |                 |                 |                  |        |             |       |       |                  |          | 3.4        |                               |                         |             |            |          |         |            |           |
| Group B Streptococcus      | 15.3             |                 |                 |                  |        |             |       |       | 5.06             |          | 9.4        |                               |                         | 0.874       |            |          |         |            |           |
| Haemophilus influenzae     | 3.91             |                 | 0.94            |                  |        |             | 2.97  |       |                  |          |            |                               |                         |             |            |          |         |            |           |
| Klebsiella pneumoniae      | 216              | 19.2            |                 |                  | 29.5   | 23.4        | 67.5  |       | 38.8             |          |            |                               |                         |             |            |          |         | 37.1       |           |
| Morganella spp.            | 0.915            |                 |                 |                  |        |             | 0.087 | 0.189 | 0.639            |          |            |                               |                         |             |            |          |         |            |           |
| Mycobacterium tuberculosis | 12               |                 |                 |                  |        |             |       |       |                  | 0.064    |            |                               | 5.1                     |             |            | 5.93     |         |            | 0.868     |
| Neisseria gonorrhoeae      | 0.306            |                 |                 |                  |        |             | 0.006 |       | 0.3              |          |            |                               |                         |             |            |          |         |            |           |
| Proteus spp.               | 15.4             | 1.22            | 2.42            |                  |        |             | 5.11  |       | 4.08             |          |            |                               |                         |             |            |          |         | 2.58       |           |
| Pseudomonas aeruginosa     | 123              | 4.63            |                 | 8.61             |        | 67.2        | 6.23  | 2.42  | 33.6             |          |            |                               |                         |             |            |          |         |            |           |
| Salmonella Typhi           | 5.73             |                 |                 |                  |        |             |       |       | 4.97             |          |            | 0.762                         |                         |             |            |          |         |            |           |
| Non-typhoidal Salmonella   | 0.256            |                 |                 |                  |        |             |       |       | 0.256            |          |            |                               |                         |             |            |          |         |            |           |
| Serratia spp.              | 13.5             | 0.888           |                 | 2.84             |        | 3.68        | 2.42  | 2.49  | 1.16             |          |            |                               |                         |             |            |          |         |            |           |
| Shigella spp.              | 0.11             |                 |                 |                  |        |             |       |       | 0.11             |          |            |                               |                         |             |            |          |         |            |           |
| Staphylococcus aureus      | 233              |                 |                 |                  |        |             |       |       | 30.1             |          | 29.4       |                               |                         | 147         |            |          |         | 22.6       | 4.26      |
| Streptococcus pneumoniae   | 131              |                 |                 |                  | 1.66   | 57.7        | 2.08  |       | 2.83             |          | 19.2       |                               |                         | 6.33        |            |          |         | 41.2       |           |
| All pathogens              | 1,390            | 53              | 15              | 27.2             | 73.6   | 258         | 156   | 11    | 365              | 0.064    | 61.4       | 0.762                         | 5.1                     | 147         | 7.2        | 5.93     | 153     | 45.9       | 0.868     |
|                            | Resistance to 1+ | Aminoglycosides | Aminopenicillin | Anti-pseudomonal | BL-BLI | Carbapenems | 3GC   | 4GC   | Fluoroquinolones | Mono INH | Macrolides | MDR in S. Typhi and Paratyphi | MDR excluding XDR in TB | Methicillin | Penicillin | Mono RIF | TMP-SMX | Vancomycin | XDR in TB |

Counts

<2.5k

# Trinidad and Tobago

DALYs (count) associated with bacterial antimicrobial resistance by pathogen–drug combinations, 2019

|                            |                  |                 |                 |                  |        |             |       |       |                  |          |            |                               |                         |             |            |          |         |            |           |
|----------------------------|------------------|-----------------|-----------------|------------------|--------|-------------|-------|-------|------------------|----------|------------|-------------------------------|-------------------------|-------------|------------|----------|---------|------------|-----------|
| Acinetobacter baumannii    | 2,030            | 1,440           |                 | 1,910            | 1,550  | 1,630       | 1,680 | 1,860 | 2,000            |          |            |                               |                         |             |            |          |         |            |           |
| Citrobacter spp.           | 124              | 27.9            |                 | 26.6             |        | 21.3        | 83.6  | 55.2  | 53               |          |            |                               |                         |             |            |          |         |            |           |
| Enterobacter spp.          | 785              | 176             |                 | 288              |        | 215         |       | 382   | 295              |          |            |                               |                         |             |            | 537      |         |            |           |
| Enterococcus faecalis      | 652              |                 |                 |                  |        |             |       |       | 625              |          |            |                               |                         |             |            |          |         | 84.7       |           |
| Enterococcus faecium       | 1,120            |                 |                 |                  |        |             |       |       | 1,110            |          |            |                               |                         |             |            |          |         | 499        |           |
| Other enterococci          | 513              |                 |                 |                  |        |             |       |       | 512              |          |            |                               |                         |             |            |          |         | 42.8       |           |
| Escherichia coli           | 3,740            | 518             | 3,500           |                  | 2,970  | 385         | 1,880 |       | 2,280            |          |            |                               |                         |             |            | 2,550    |         |            |           |
| Group A Streptococcus      | 153              |                 |                 |                  |        |             |       |       |                  |          | 153        |                               |                         |             |            |          |         |            |           |
| Group B Streptococcus      | 400              |                 |                 |                  |        |             |       |       | 104              |          | 341        |                               |                         | 13.2        |            |          |         |            |           |
| Haemophilus influenzae     | 55.1             |                 | 32.1            |                  |        |             |       | 31.5  |                  |          |            |                               |                         |             |            |          |         |            |           |
| Klebsiella pneumoniae      | 3,340            | 886             |                 |                  | 2,990  | 328         | 1,950 |       | 2,080            |          |            |                               |                         |             |            | 2,680    |         |            |           |
| Morganella spp.            | 14.4             |                 |                 |                  |        |             |       | 2.93  | 3.29             | 12.9     |            |                               |                         |             |            |          |         |            |           |
| Mycobacterium tuberculosis | 14.1             |                 |                 |                  |        |             |       |       |                  | 4.33     |            |                               | 7.34                    |             |            | 1.28     |         |            | 1.16      |
| Neisseria gonorrhoeae      | 10.3             |                 |                 |                  |        |             |       | 0.072 |                  | 10.3     |            |                               |                         |             |            |          |         |            |           |
| Proteus spp.               | 456              | 70.5            | 422             |                  |        |             |       | 87.5  |                  | 212      |            |                               |                         |             |            |          | 296     |            |           |
| Pseudomonas aeruginosa     | 1,860            | 813             |                 | 792              |        | 1,330       | 741   | 634   | 1,100            |          |            |                               |                         |             |            |          |         |            |           |
| Salmonella Typhi           | 111              |                 |                 |                  |        |             |       |       | 93.7             |          |            | 21.7                          |                         |             |            |          |         |            |           |
| Non-typhoidal Salmonella   | 7.58             |                 |                 |                  |        |             |       |       | 7.58             |          |            |                               |                         |             |            |          |         |            |           |
| Serratia spp.              | 228              | 65.6            |                 | 58.2             |        | 68.7        | 162   | 89    | 46               |          |            |                               |                         |             |            |          |         |            |           |
| Shigella spp.              | 1.31             |                 |                 |                  |        |             |       |       | 1.31             |          |            |                               |                         |             |            |          |         |            |           |
| Staphylococcus aureus      | 4,270            |                 |                 |                  |        |             |       |       | 2,060            |          | 3,000      |                               |                         | 3,810       |            |          | 1,030   | 60.2       |           |
| Streptococcus pneumoniae   | 2,270            |                 |                 |                  | 468    | 826         | 761   |       | 97.4             |          | 1,510      |                               |                         | 967         |            |          | 1,620   |            |           |
| All pathogens              | 22,200           | 4,000           | 3,960           | 3,080            | 7,980  | 4,800       | 7,380 | 3,030 | 12,700           | 4.33     | 5,010      | 21.7                          | 7.34                    | 3,810       | 980        | 1.28     | 8,710   | 687        | 1.16      |
|                            | Resistance to 1+ | Aminoglycosides | Aminopenicillin | Anti-pseudomonal | BL-BLI | Carbapenems | 3GC   | 4GC   | Fluoroquinolones | Mono INH | Macrolides | MDR in S. Typhi and Paratyphi | MDR excluding XDR in TB | Methicillin | Penicillin | Mono RIF | TMP-SMX | Vancomycin | XDR in TB |

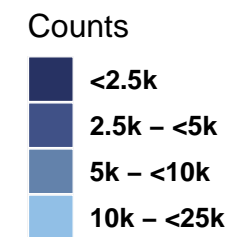

# Trinidad and Tobago

DALYs (count) *attributable* to bacterial antimicrobial resistance by pathogen–drug combinations, 2019

|                            |                  |                 |                 |                  |        |             |      |       |                  |          |            |                               |                         |             |            |          |         |            |           |
|----------------------------|------------------|-----------------|-----------------|------------------|--------|-------------|------|-------|------------------|----------|------------|-------------------------------|-------------------------|-------------|------------|----------|---------|------------|-----------|
| Acinetobacter baumannii    | 641              | 60.9            |                 | 45.3             | 0.744  | 262         | 6.38 | 4.72  | 261              |          |            |                               |                         |             |            |          |         |            |           |
| Citrobacter spp.           | 35.1             | 1.62            |                 | 5.05             |        | 5.04        | 9.11 | 6.11  | 8.21             |          |            |                               |                         |             |            |          |         |            |           |
| Enterobacter spp.          | 177              | 11              |                 | 27.8             |        | 52.2        |      | 19.9  | 32.4             |          |            |                               |                         |             |            |          | 33.5    |            |           |
| Enterococcus faecalis      | 177              |                 |                 |                  |        |             |      |       | 153              |          |            |                               |                         |             |            |          |         | 24.5       |           |
| Enterococcus faecium       | 310              |                 |                 |                  |        |             |      |       | 196              |          |            |                               |                         |             |            |          |         | 114        |           |
| Other enterococci          | 106              |                 |                 |                  |        |             |      |       | 97.9             |          |            |                               |                         |             |            |          |         | 7.83       |           |
| Escherichia coli           | 937              | 31              | 38.7            |                  | 141    | 84.8        | 247  |       | 244              |          |            |                               |                         |             |            |          | 150     |            |           |
| Group A Streptococcus      | 14.6             |                 |                 |                  |        |             |      |       |                  |          | 14.6       |                               |                         |             |            |          |         |            |           |
| Group B Streptococcus      | 55.9             |                 |                 |                  |        |             |      |       | 18               |          | 34.8       |                               |                         | 3.11        |            |          |         |            |           |
| Haemophilus influenzae     | 13.7             |                 | 4.42            |                  |        |             |      | 9.24  |                  |          |            |                               |                         |             |            |          |         |            |           |
| Klebsiella pneumoniae      | 812              | 71.5            |                 |                  | 115    | 85.7        | 255  |       | 145              |          |            |                               |                         |             |            |          | 139     |            |           |
| Morganella spp.            | 3.23             |                 |                 |                  |        |             |      | 0.303 | 0.552            | 2.37     |            |                               |                         |             |            |          |         |            |           |
| Mycobacterium tuberculosis | 5.48             |                 |                 |                  |        |             |      |       |                  | 0.61     |            |                               | 3.88                    |             |            | 0.328    |         |            | 0.664     |
| Neisseria gonorrhoeae      | 1.02             |                 |                 |                  |        |             |      | 0.021 |                  | 0.997    |            |                               |                         |             |            |          |         |            |           |
| Proteus spp.               | 57.3             | 3.33            | 9.3             |                  |        |             |      | 19.3  |                  | 14.6     |            |                               |                         |             |            |          |         | 10.8       |           |
| Pseudomonas aeruginosa     | 434              | 21.2            |                 | 36.5             |        | 230         | 21.3 | 7.91  | 118              |          |            |                               |                         |             |            |          |         |            |           |
| Salmonella Typhi           | 21.6             |                 |                 |                  |        |             |      |       | 19               |          |            | 2.58                          |                         |             |            |          |         |            |           |
| Non-typhoidal Salmonella   | 1.25             |                 |                 |                  |        |             |      |       | 1.25             |          |            |                               |                         |             |            |          |         |            |           |
| Serratia spp.              | 60.7             | 3.91            |                 | 11.3             |        | 18.7        | 14.2 | 7.73  | 4.85             |          |            |                               |                         |             |            |          |         |            |           |
| Shigella spp.              | 0.217            |                 |                 |                  |        |             |      |       | 0.217            |          |            |                               |                         |             |            |          |         |            |           |
| Staphylococcus aureus      | 1,270            |                 |                 |                  |        |             |      |       | 83.6             |          | 102        |                               |                         | 989         |            |          |         | 80.1       | 13.6      |
| Streptococcus pneumoniae   | 483              |                 |                 |                  | 4.67   | 181         | 46.3 |       | 10.6             |          | 61.4       |                               |                         |             | 41.6       |          |         | 138        |           |
| All pathogens              | 5,620            | 204             | 52.5            | 126              | 261    | 919         | 628  | 46.9  | 1,410            | 0.61     | 213        | 2.58                          | 3.88                    | 989         | 44.7       | 0.328    | 551     | 160        | 0.664     |
|                            | Resistance to 1+ | Aminoglycosides | Aminopenicillin | Anti-pseudomonal | BL-BLI | Carbapenems | 3GC  | 4GC   | Fluoroquinolones | Mono INH | Macrolides | MDR in S. Typhi and Paratyphi | MDR excluding XDR in TB | Methicillin | Penicillin | Mono RIF | TMP-SMX | Vancomycin | XDR in TB |

Counts

<2.5k

5k – <10k



# United States of America

DALYs (count) associated with bacterial antimicrobial resistance by pathogen–drug combinations, 2019

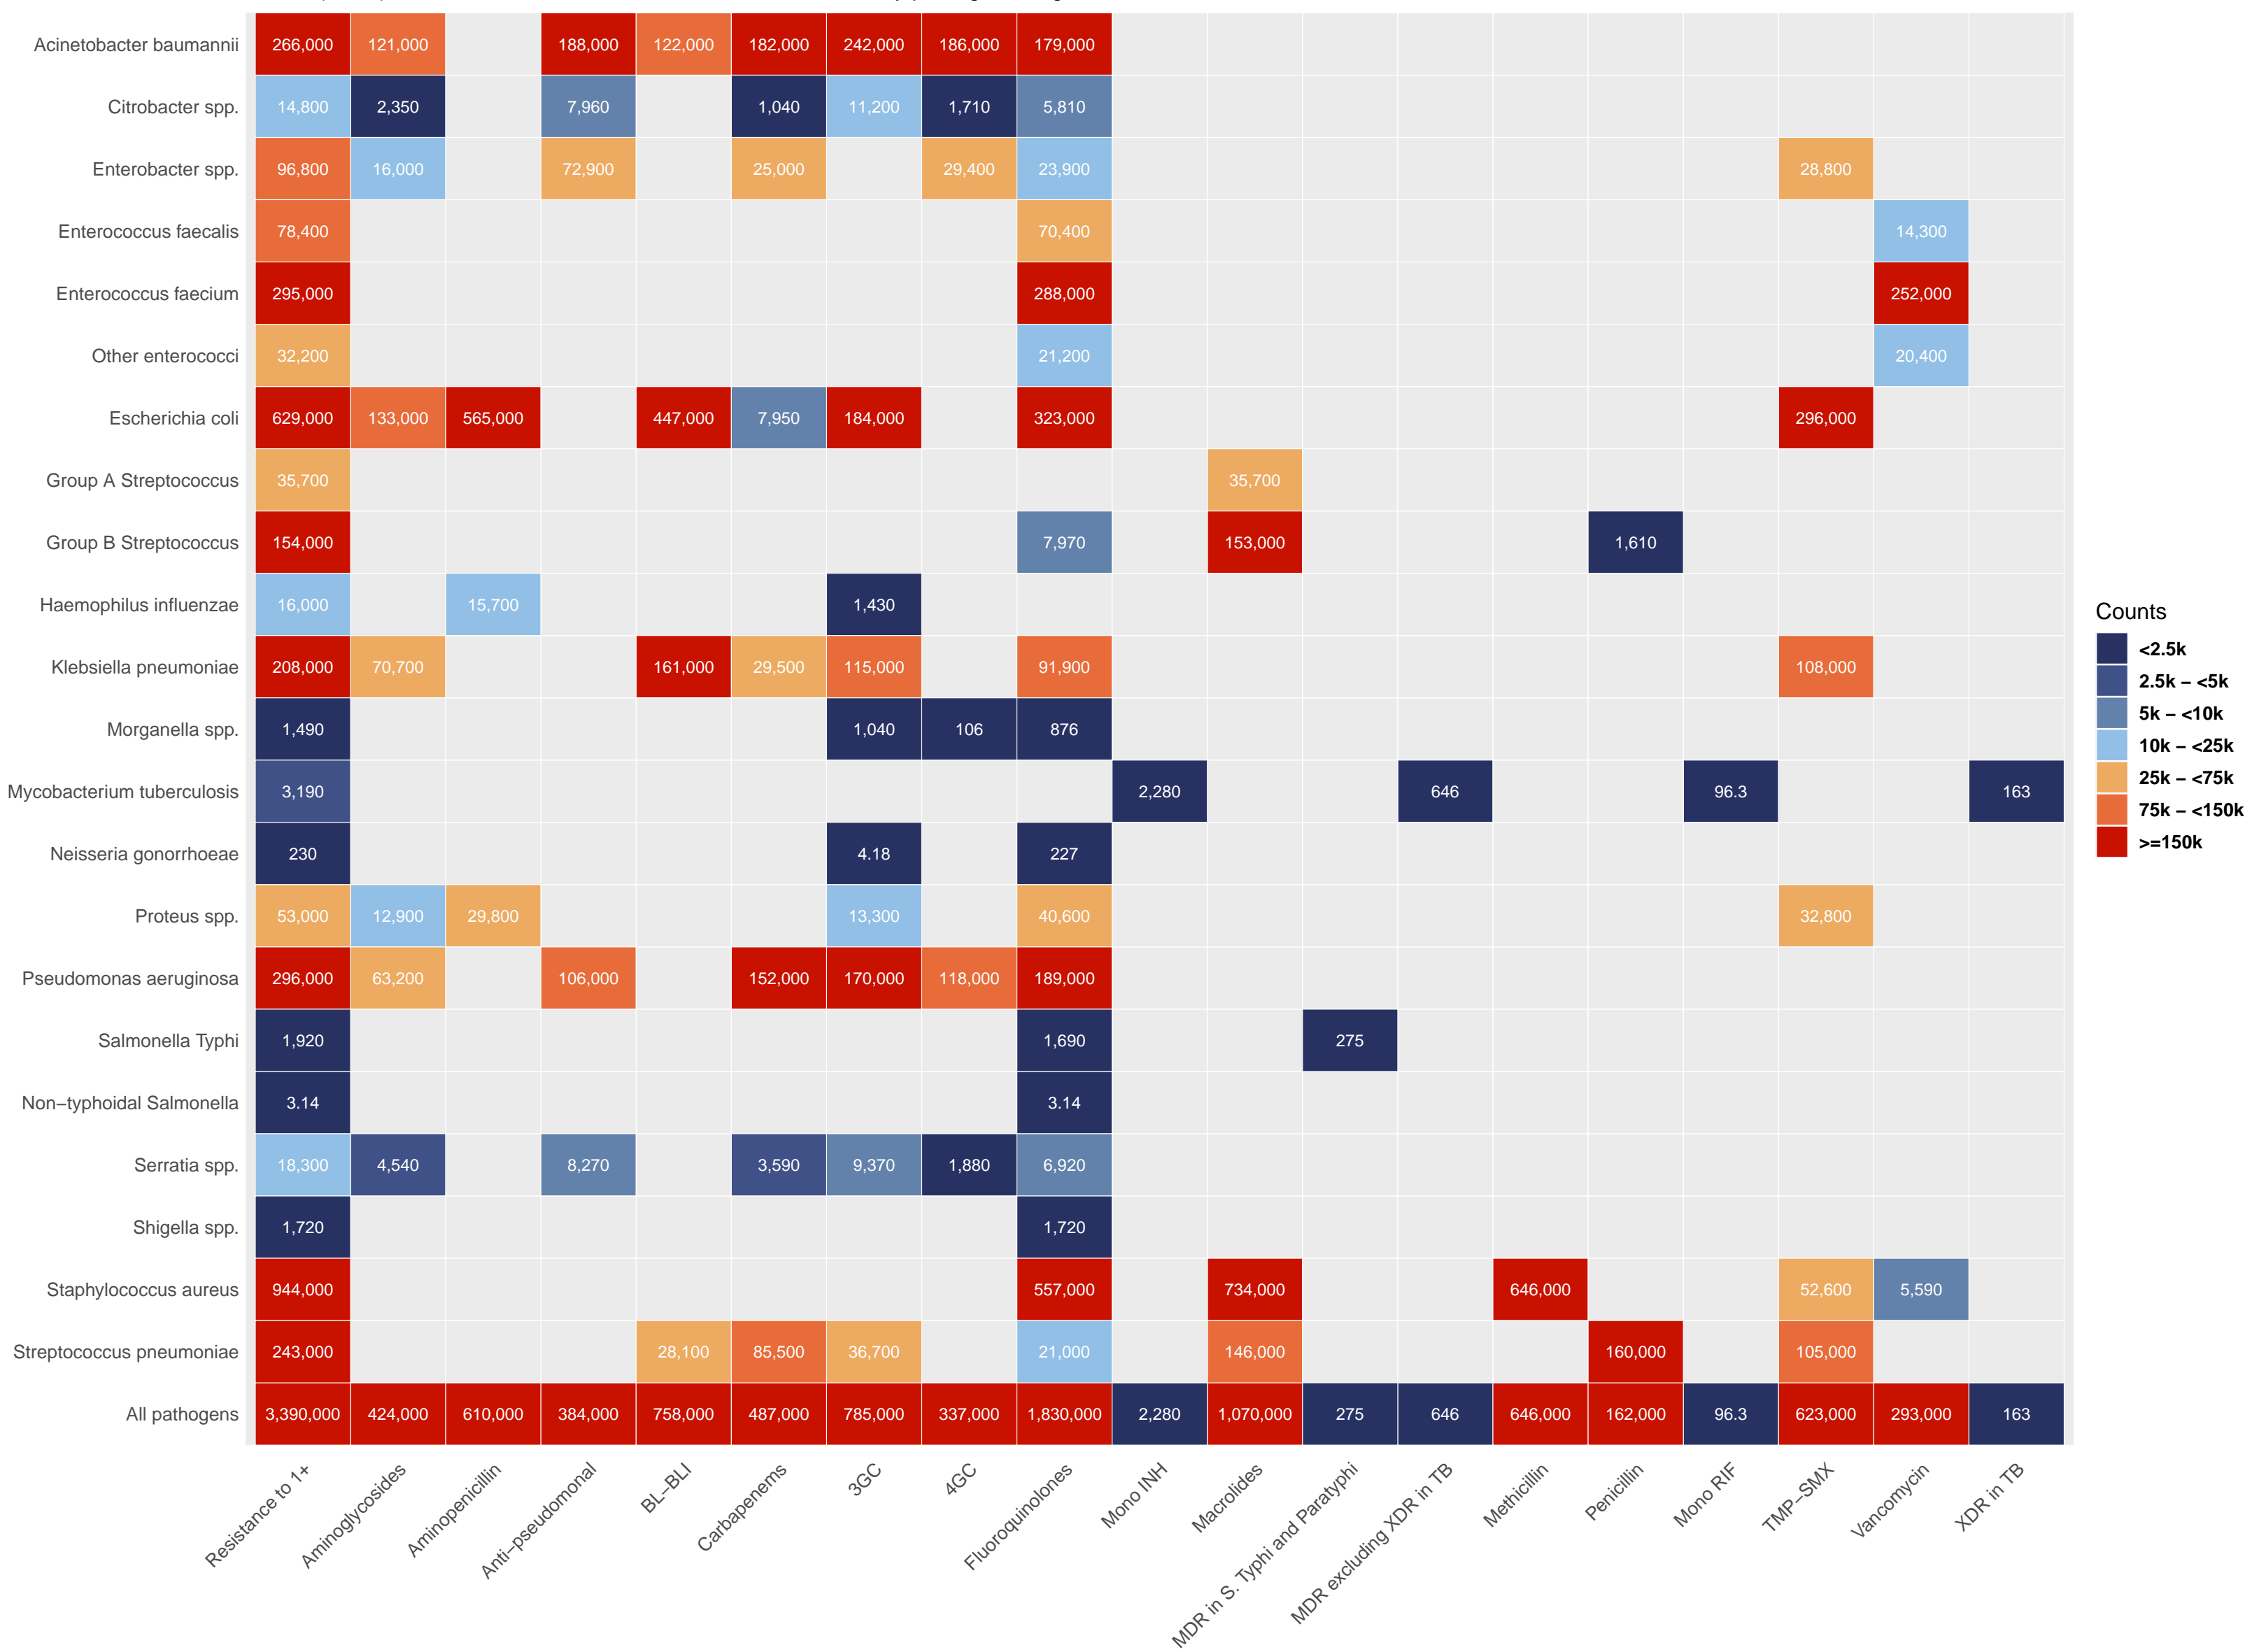

# United States of America

DALYs (count) *attributable to bacterial antimicrobial resistance by pathogen–drug combinations, 2019*

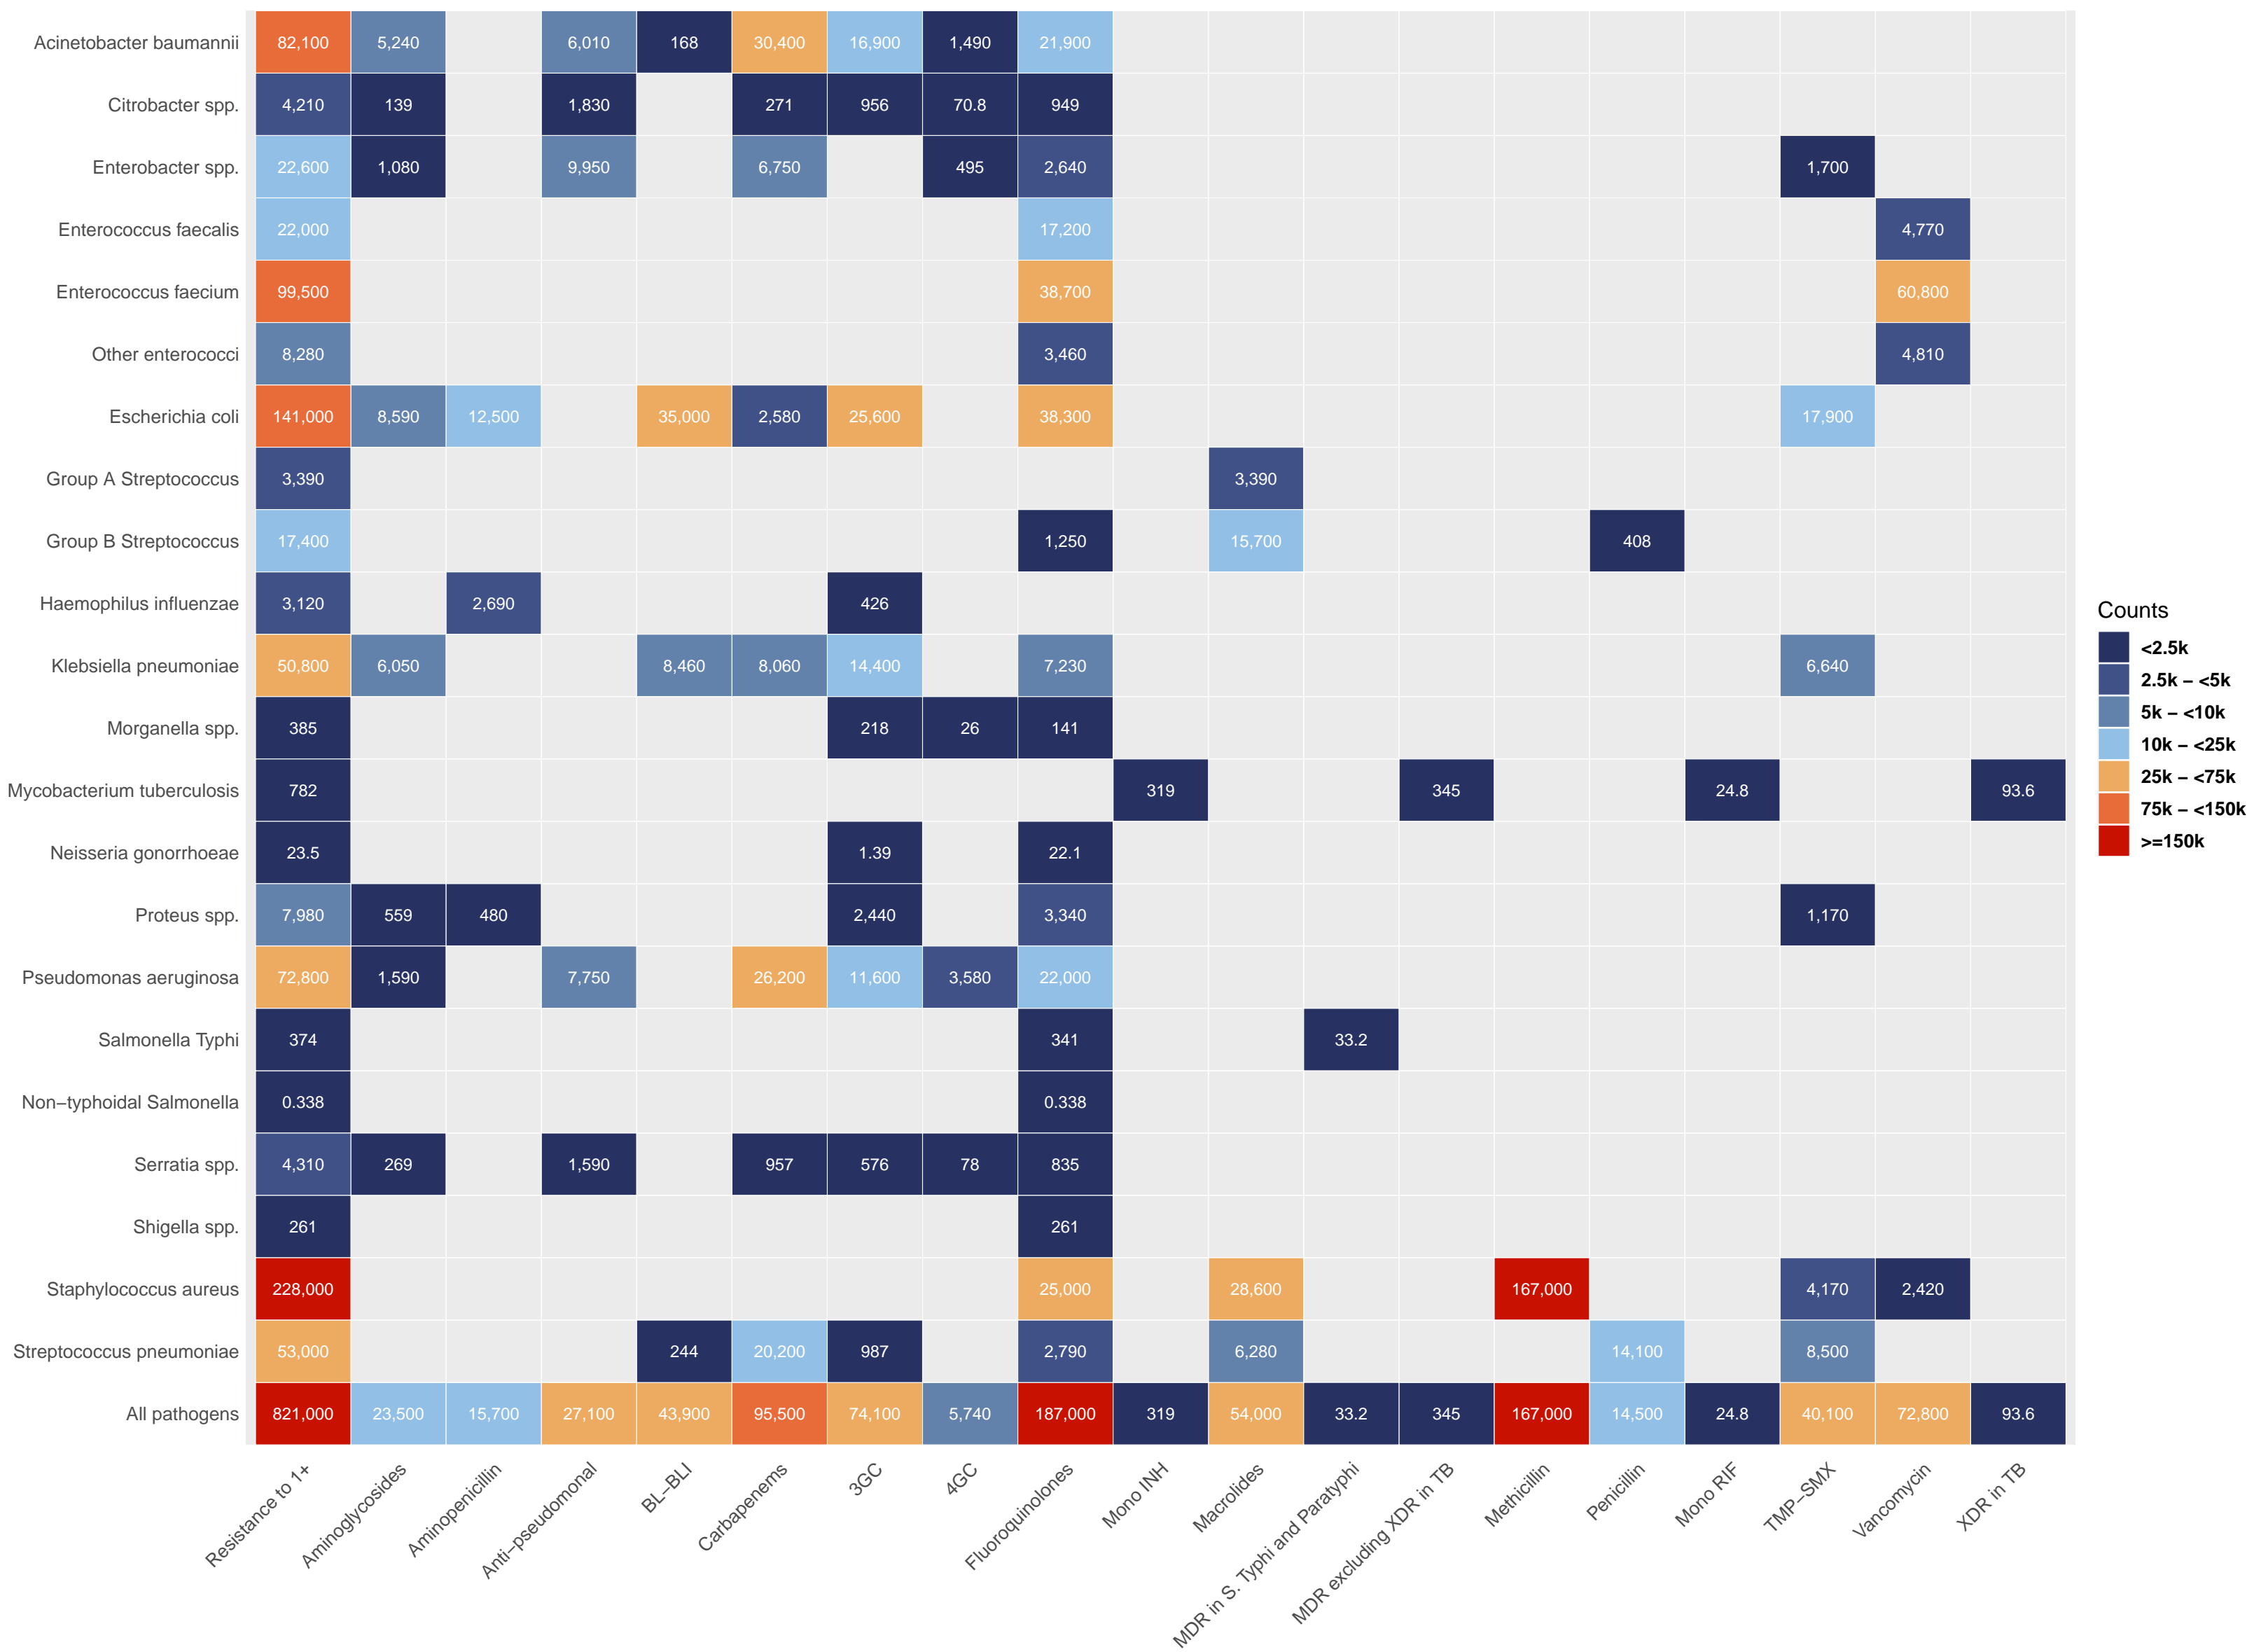

# Uruguay

DALYs (count) associated with bacterial antimicrobial resistance by pathogen–drug combinations, 2019

|                            |                  |                 |                 |                  |        |             |        |       |                  |          |            |                               |                         |             |            |          |         |            |           |
|----------------------------|------------------|-----------------|-----------------|------------------|--------|-------------|--------|-------|------------------|----------|------------|-------------------------------|-------------------------|-------------|------------|----------|---------|------------|-----------|
| Acinetobacter baumannii    | 4,110            | 2,710           |                 | 3,840            | 3,130  | 3,510       | 4,000  | 3,910 | 3,480            |          |            |                               |                         |             |            |          |         |            |           |
| Citrobacter spp.           | 269              | 15.1            |                 | 77.6             |        | 45.8        | 220    | 99    | 73.1             |          |            |                               |                         |             |            |          |         |            |           |
| Enterobacter spp.          | 1,500            | 211             |                 | 861              |        | 450         |        | 858   | 349              |          |            |                               |                         |             |            | 569      |         |            |           |
| Enterococcus faecalis      | 811              |                 |                 |                  |        |             |        |       | 749              |          |            |                               |                         |             |            |          |         | 108        |           |
| Enterococcus faecium       | 3,160            |                 |                 |                  |        |             |        |       | 3,140            |          |            |                               |                         |             |            |          |         | 1,290      |           |
| Other enterococci          | 1,320            |                 |                 |                  |        |             |        |       | 1,310            |          |            |                               |                         |             |            |          |         | 443        |           |
| Escherichia coli           | 9,560            | 1,400           | 8,860           |                  | 6,640  | 1,640       | 2,890  |       | 2,470            |          |            |                               |                         |             |            | 5,240    |         |            |           |
| Group A Streptococcus      | 160              |                 |                 |                  |        |             |        |       |                  |          | 160        |                               |                         |             |            |          |         |            |           |
| Group B Streptococcus      | 817              |                 |                 |                  |        |             |        |       | 261              |          | 664        |                               |                         | 18.5        |            |          |         |            |           |
| Haemophilus influenzae     | 96.9             |                 | 72.5            |                  |        |             |        | 36.9  |                  |          |            |                               |                         |             |            |          |         |            |           |
| Klebsiella pneumoniae      | 7,190            | 1,980           |                 |                  | 6,110  | 1,320       | 5,930  |       | 3,990            |          |            |                               |                         |             |            | 4,540    |         |            |           |
| Morganella spp.            | 30.8             |                 |                 |                  |        |             |        | 19.2  | 6.56             | 18.2     |            |                               |                         |             |            |          |         |            |           |
| Mycobacterium tuberculosis | 32.8             |                 |                 |                  |        |             |        |       |                  | 15.5     |            |                               | 10.9                    |             |            | 3.68     |         |            | 2.74      |
| Neisseria gonorrhoeae      | 16.1             |                 |                 |                  |        |             |        | 0.051 |                  | 16       |            |                               |                         |             |            |          |         |            |           |
| Proteus spp.               | 1,120            | 94.9            | 1,080           |                  |        |             |        | 359   |                  | 357      |            |                               |                         |             |            |          | 480     |            |           |
| Pseudomonas aeruginosa     | 4,890            | 1,570           |                 | 2,530            |        | 2,800       | 3,270  | 2,240 | 2,730            |          |            |                               |                         |             |            |          |         |            |           |
| Salmonella Typhi           | 59.2             |                 |                 |                  |        |             |        |       | 53               |          |            | 7.01                          |                         |             |            |          |         |            |           |
| Non-typhoidal Salmonella   | 8.24             |                 |                 |                  |        |             |        |       | 8.24             |          |            |                               |                         |             |            |          |         |            |           |
| Serratia spp.              | 499              | 151             |                 | 116              |        | 74.2        | 346    | 312   | 61               |          |            |                               |                         |             |            |          |         |            |           |
| Shigella spp.              | 0.449            |                 |                 |                  |        |             |        |       | 0.449            |          |            |                               |                         |             |            |          |         |            |           |
| Staphylococcus aureus      | 7,540            |                 |                 |                  |        |             |        |       | 2,860            |          | 5,810      |                               |                         | 4,640       |            |          | 400     | 171        |           |
| Streptococcus pneumoniae   | 4,910            |                 |                 |                  | 791    | 2,700       | 748    |       | 156              |          | 3,590      |                               |                         |             | 2,450      |          | 2,700   |            |           |
| All pathogens              | 48,100           | 8,130           | 10,000          | 7,420            | 16,700 | 12,500      | 17,800 | 7,430 | 22,100           | 15.5     | 10,200     | 7.01                          | 10.9                    | 4,640       | 2,470      | 3.68     | 13,900  | 2,010      | 2.74      |
|                            | Resistance to 1+ | Aminoglycosides | Aminopenicillin | Anti-pseudomonal | BL-BLI | Carbapenems | 3GC    | 4GC   | Fluoroquinolones | Mono INH | Macrolides | MDR in S. Typhi and Paratyphi | MDR excluding XDR in TB | Methicillin | Penicillin | Mono RIF | TMP-SMX | Vancomycin | XDR in TB |

Counts



# Uruguay

DALYs (count) *attributable to bacterial antimicrobial resistance by pathogen–drug combinations, 2019*

|                            |                  |                 |                 |                  |        |             |       |      |                  |          |            |                               |                         |             |            |          |         |            |           |
|----------------------------|------------------|-----------------|-----------------|------------------|--------|-------------|-------|------|------------------|----------|------------|-------------------------------|-------------------------|-------------|------------|----------|---------|------------|-----------|
| Acinetobacter baumannii    | 1,310            | 115             |                 | 97.5             | 0.396  | 593         | 44.2  | 28.2 | 433              |          |            |                               |                         |             |            |          |         |            |           |
| Citrobacter spp.           | 78.4             | 0.851           |                 | 17               |        | 11.8        | 27    | 10.6 | 11.1             |          |            |                               |                         |             |            |          |         |            |           |
| Enterobacter spp.          | 363              | 13.7            |                 | 108              |        | 121         |       | 49.2 | 37               |          |            |                               |                         |             |            |          | 34.2    |            |           |
| Enterococcus faecalis      | 223              |                 |                 |                  |        |             |       |      | 186              |          |            |                               |                         |             |            |          |         | 36.6       |           |
| Enterococcus faecium       | 857              |                 |                 |                  |        |             |       |      | 562              |          |            |                               |                         |             |            |          |         | 295        |           |
| Other enterococci          | 300              |                 |                 |                  |        |             |       |      | 226              |          |            |                               |                         |             |            |          |         | 74.2       |           |
| Escherichia coli           | 2,250            | 96.5            | 222             |                  | 484    | 446         | 396   |      | 256              |          |            |                               |                         |             |            |          | 346     |            |           |
| Group A Streptococcus      | 15.4             |                 |                 |                  |        |             |       |      |                  |          | 15.4       |                               |                         |             |            |          |         |            |           |
| Group B Streptococcus      | 118              |                 |                 |                  |        |             |       |      | 46               |          | 66.8       |                               |                         | 4.68        |            |          |         |            |           |
| Haemophilus influenzae     | 22               |                 | 11.2            |                  |        |             |       | 10.8 |                  |          |            |                               |                         |             |            |          |         |            |           |
| Klebsiella pneumoniae      | 2,020            | 166             |                 |                  | 127    | 331         | 864   |      | 296              |          |            |                               |                         |             |            |          | 233     |            |           |
| Morganella spp.            | 7.9              |                 |                 |                  |        |             | 3.45  | 1.45 | 3.01             |          |            |                               |                         |             |            |          |         |            |           |
| Mycobacterium tuberculosis | 10.6             |                 |                 |                  |        |             |       |      |                  | 2.24     |            |                               | 5.87                    |             |            | 0.957    |         |            | 1.58      |
| Neisseria gonorrhoeae      | 1.58             |                 |                 |                  |        |             | 0.022 |      | 1.56             |          |            |                               |                         |             |            |          |         |            |           |
| Proteus spp.               | 154              | 5.14            | 23.2            |                  |        |             | 82.5  |      | 25.3             |          |            |                               |                         |             |            |          | 18      |            |           |
| Pseudomonas aeruginosa     | 1,250            | 41.1            |                 | 202              |        | 498         | 171   | 46.5 | 295              |          |            |                               |                         |             |            |          |         |            |           |
| Salmonella Typhi           | 11.8             |                 |                 |                  |        |             |       |      | 11               |          |            | 0.885                         |                         |             |            |          |         |            |           |
| Non-typhoidal Salmonella   | 1.45             |                 |                 |                  |        |             |       |      | 1.45             |          |            |                               |                         |             |            |          |         |            |           |
| Serratia spp.              | 127              | 8.98            |                 | 24.9             |        | 20.3        | 26.8  | 39.7 | 6.56             |          |            |                               |                         |             |            |          |         |            |           |
| Shigella spp.              | 0.075            |                 |                 |                  |        |             |       |      | 0.075            |          |            |                               |                         |             |            |          |         |            |           |
| Staphylococcus aureus      | 1,710            |                 |                 |                  |        |             |       |      | 134              |          | 252        |                               |                         | 1,240       |            |          | 36.5    | 48.3       |           |
| Streptococcus pneumoniae   | 1,120            |                 |                 |                  | 1.67   | 634         | 2.5   |      | 17.1             |          | 149        |                               |                         |             | 105        |          | 215     |            |           |
| All pathogens              | 11,900           | 447             | 256             | 449              | 613    | 2,660       | 1,630 | 176  | 2,550            | 2.24     | 483        | 0.885                         | 5.87                    | 1,240       | 109        | 0.957    | 882     | 454        | 1.58      |
|                            | Resistance to 1+ | Aminoglycosides | Aminopenicillin | Anti-pseudomonal | BL-BLI | Carbapenems | 3GC   | 4GC  | Fluoroquinolones | Mono INH | Macrolides | MDR in S. Typhi and Paratyphi | MDR excluding XDR in TB | Methicillin | Penicillin | Mono RIF | TMP-SMX | Vancomycin | XDR in TB |

Counts

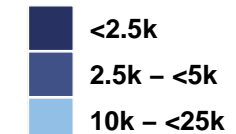

# Venezuela

DALYs (count) associated with bacterial antimicrobial resistance by pathogen–drug combinations, 2019

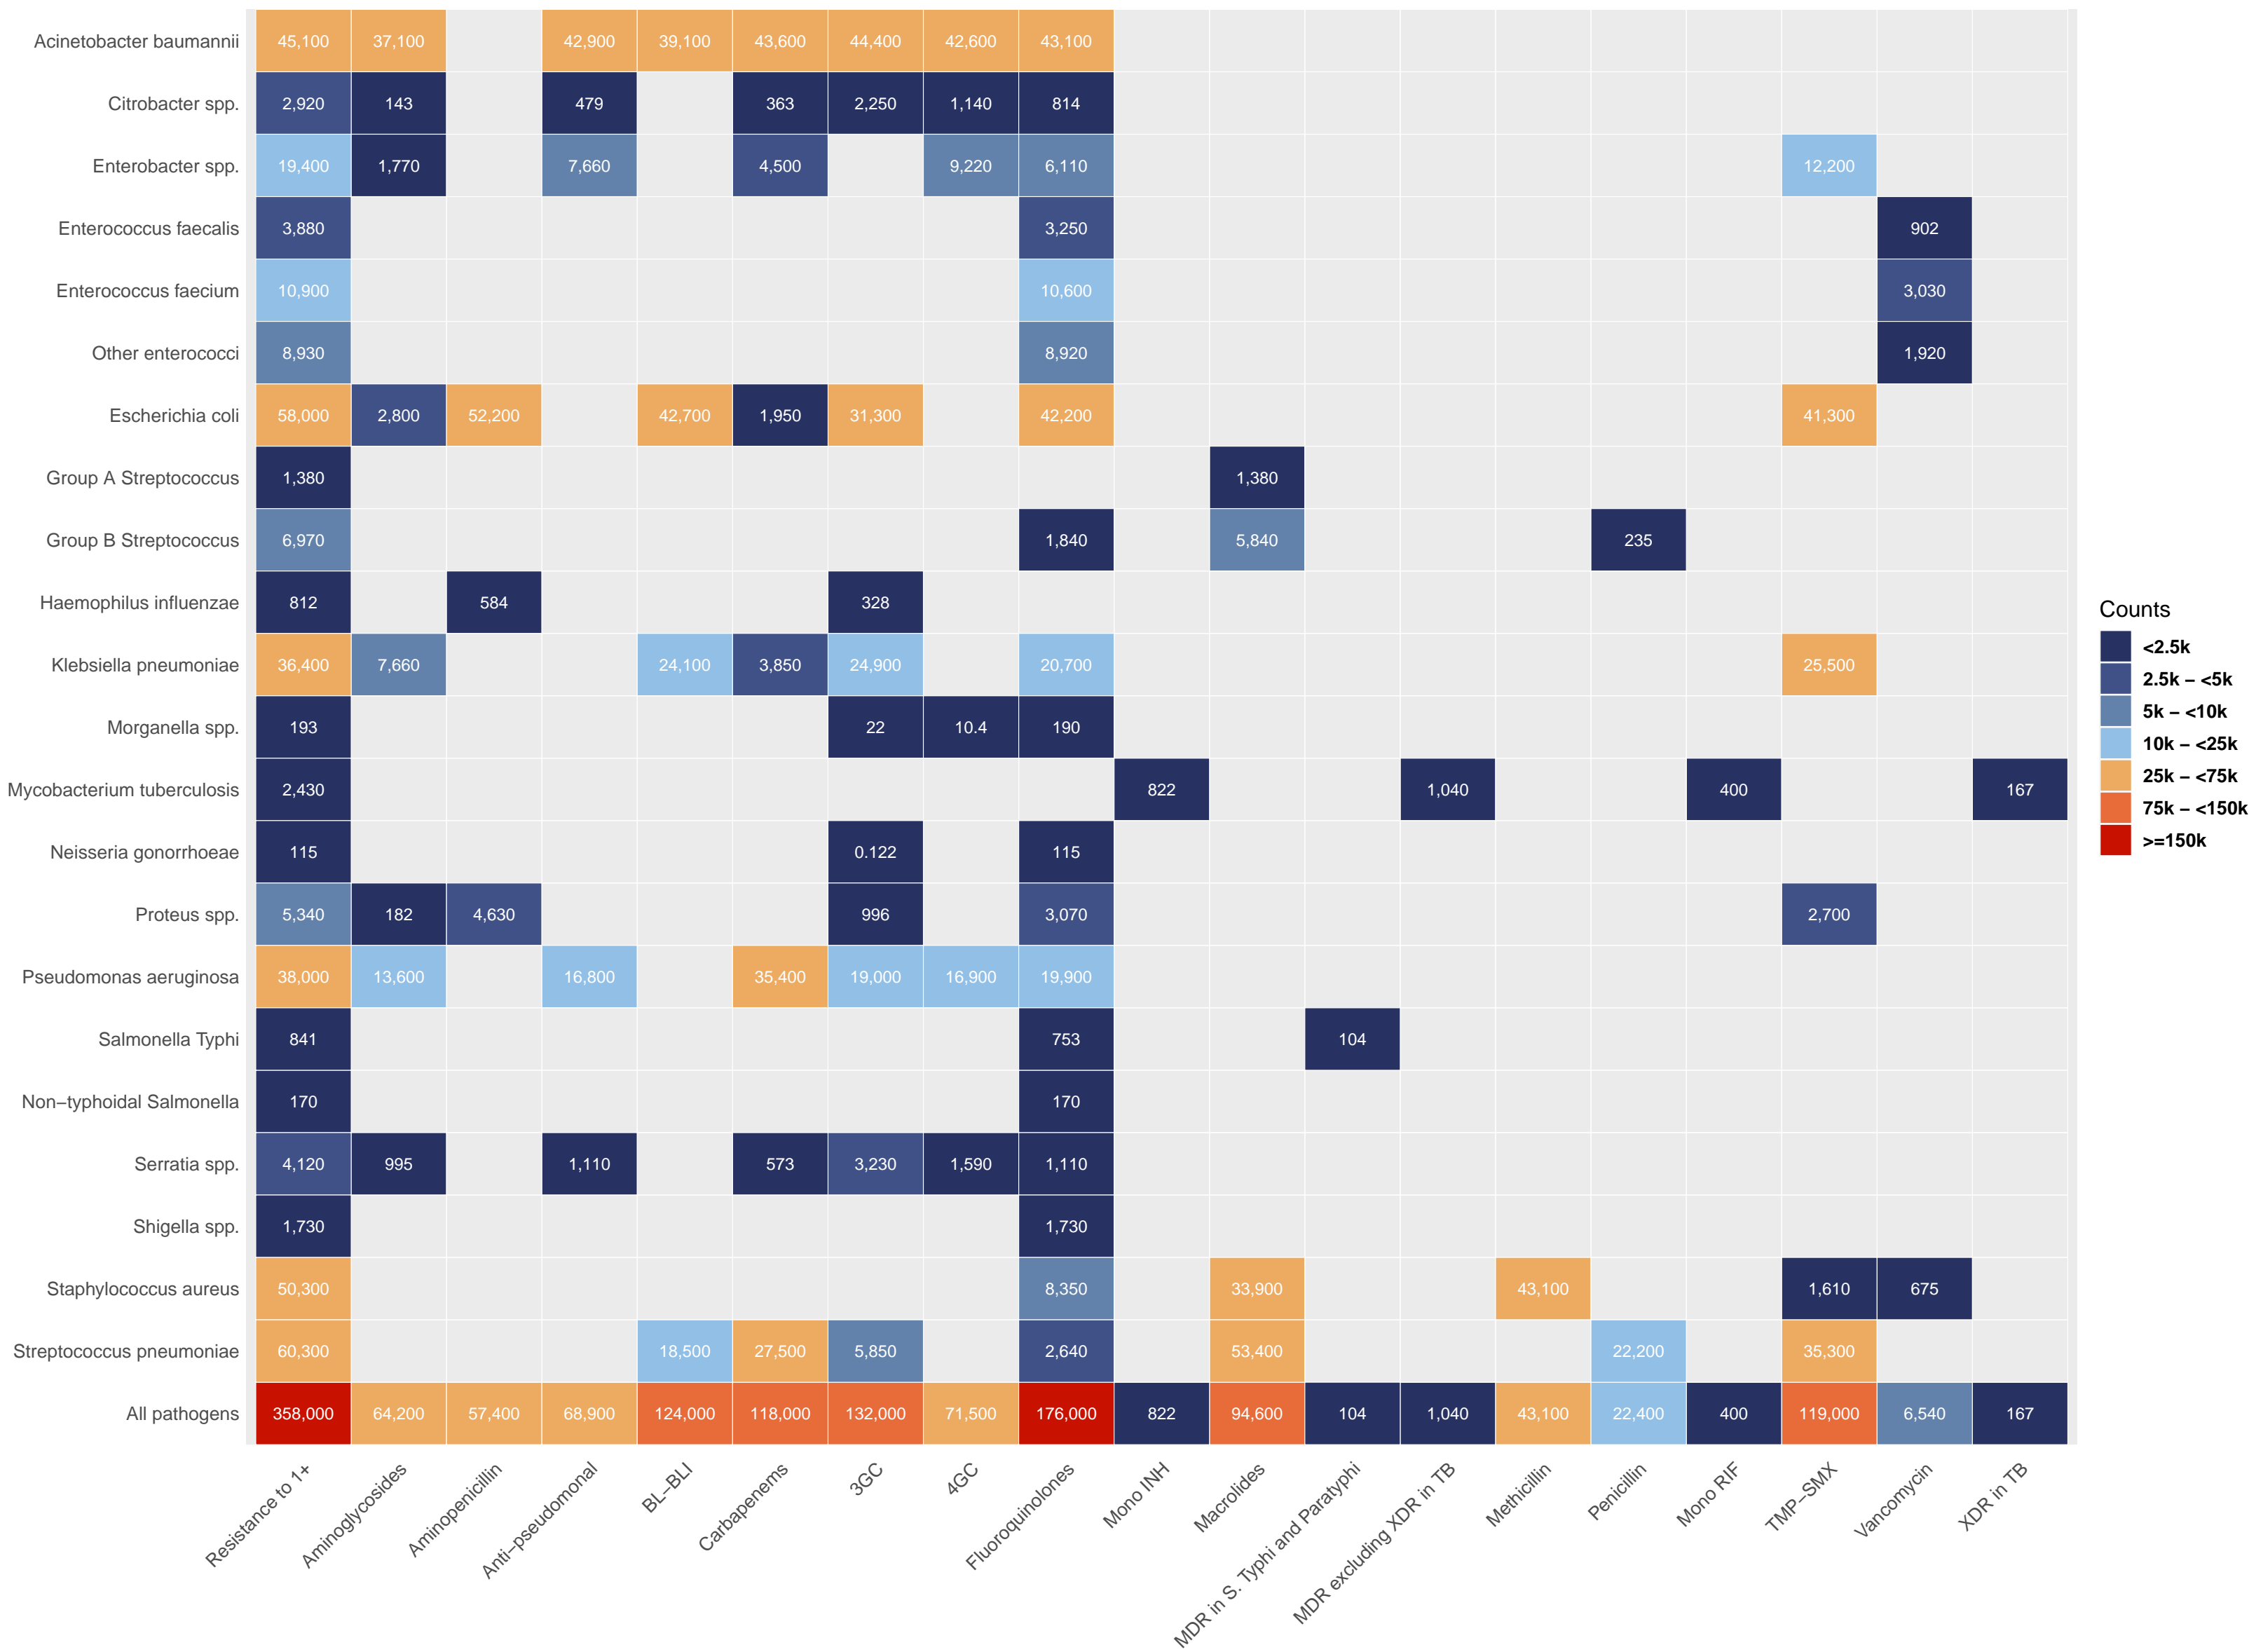

# Venezuela

DALYs (count) *attributable to bacterial antimicrobial resistance by pathogen–drug combinations, 2019*

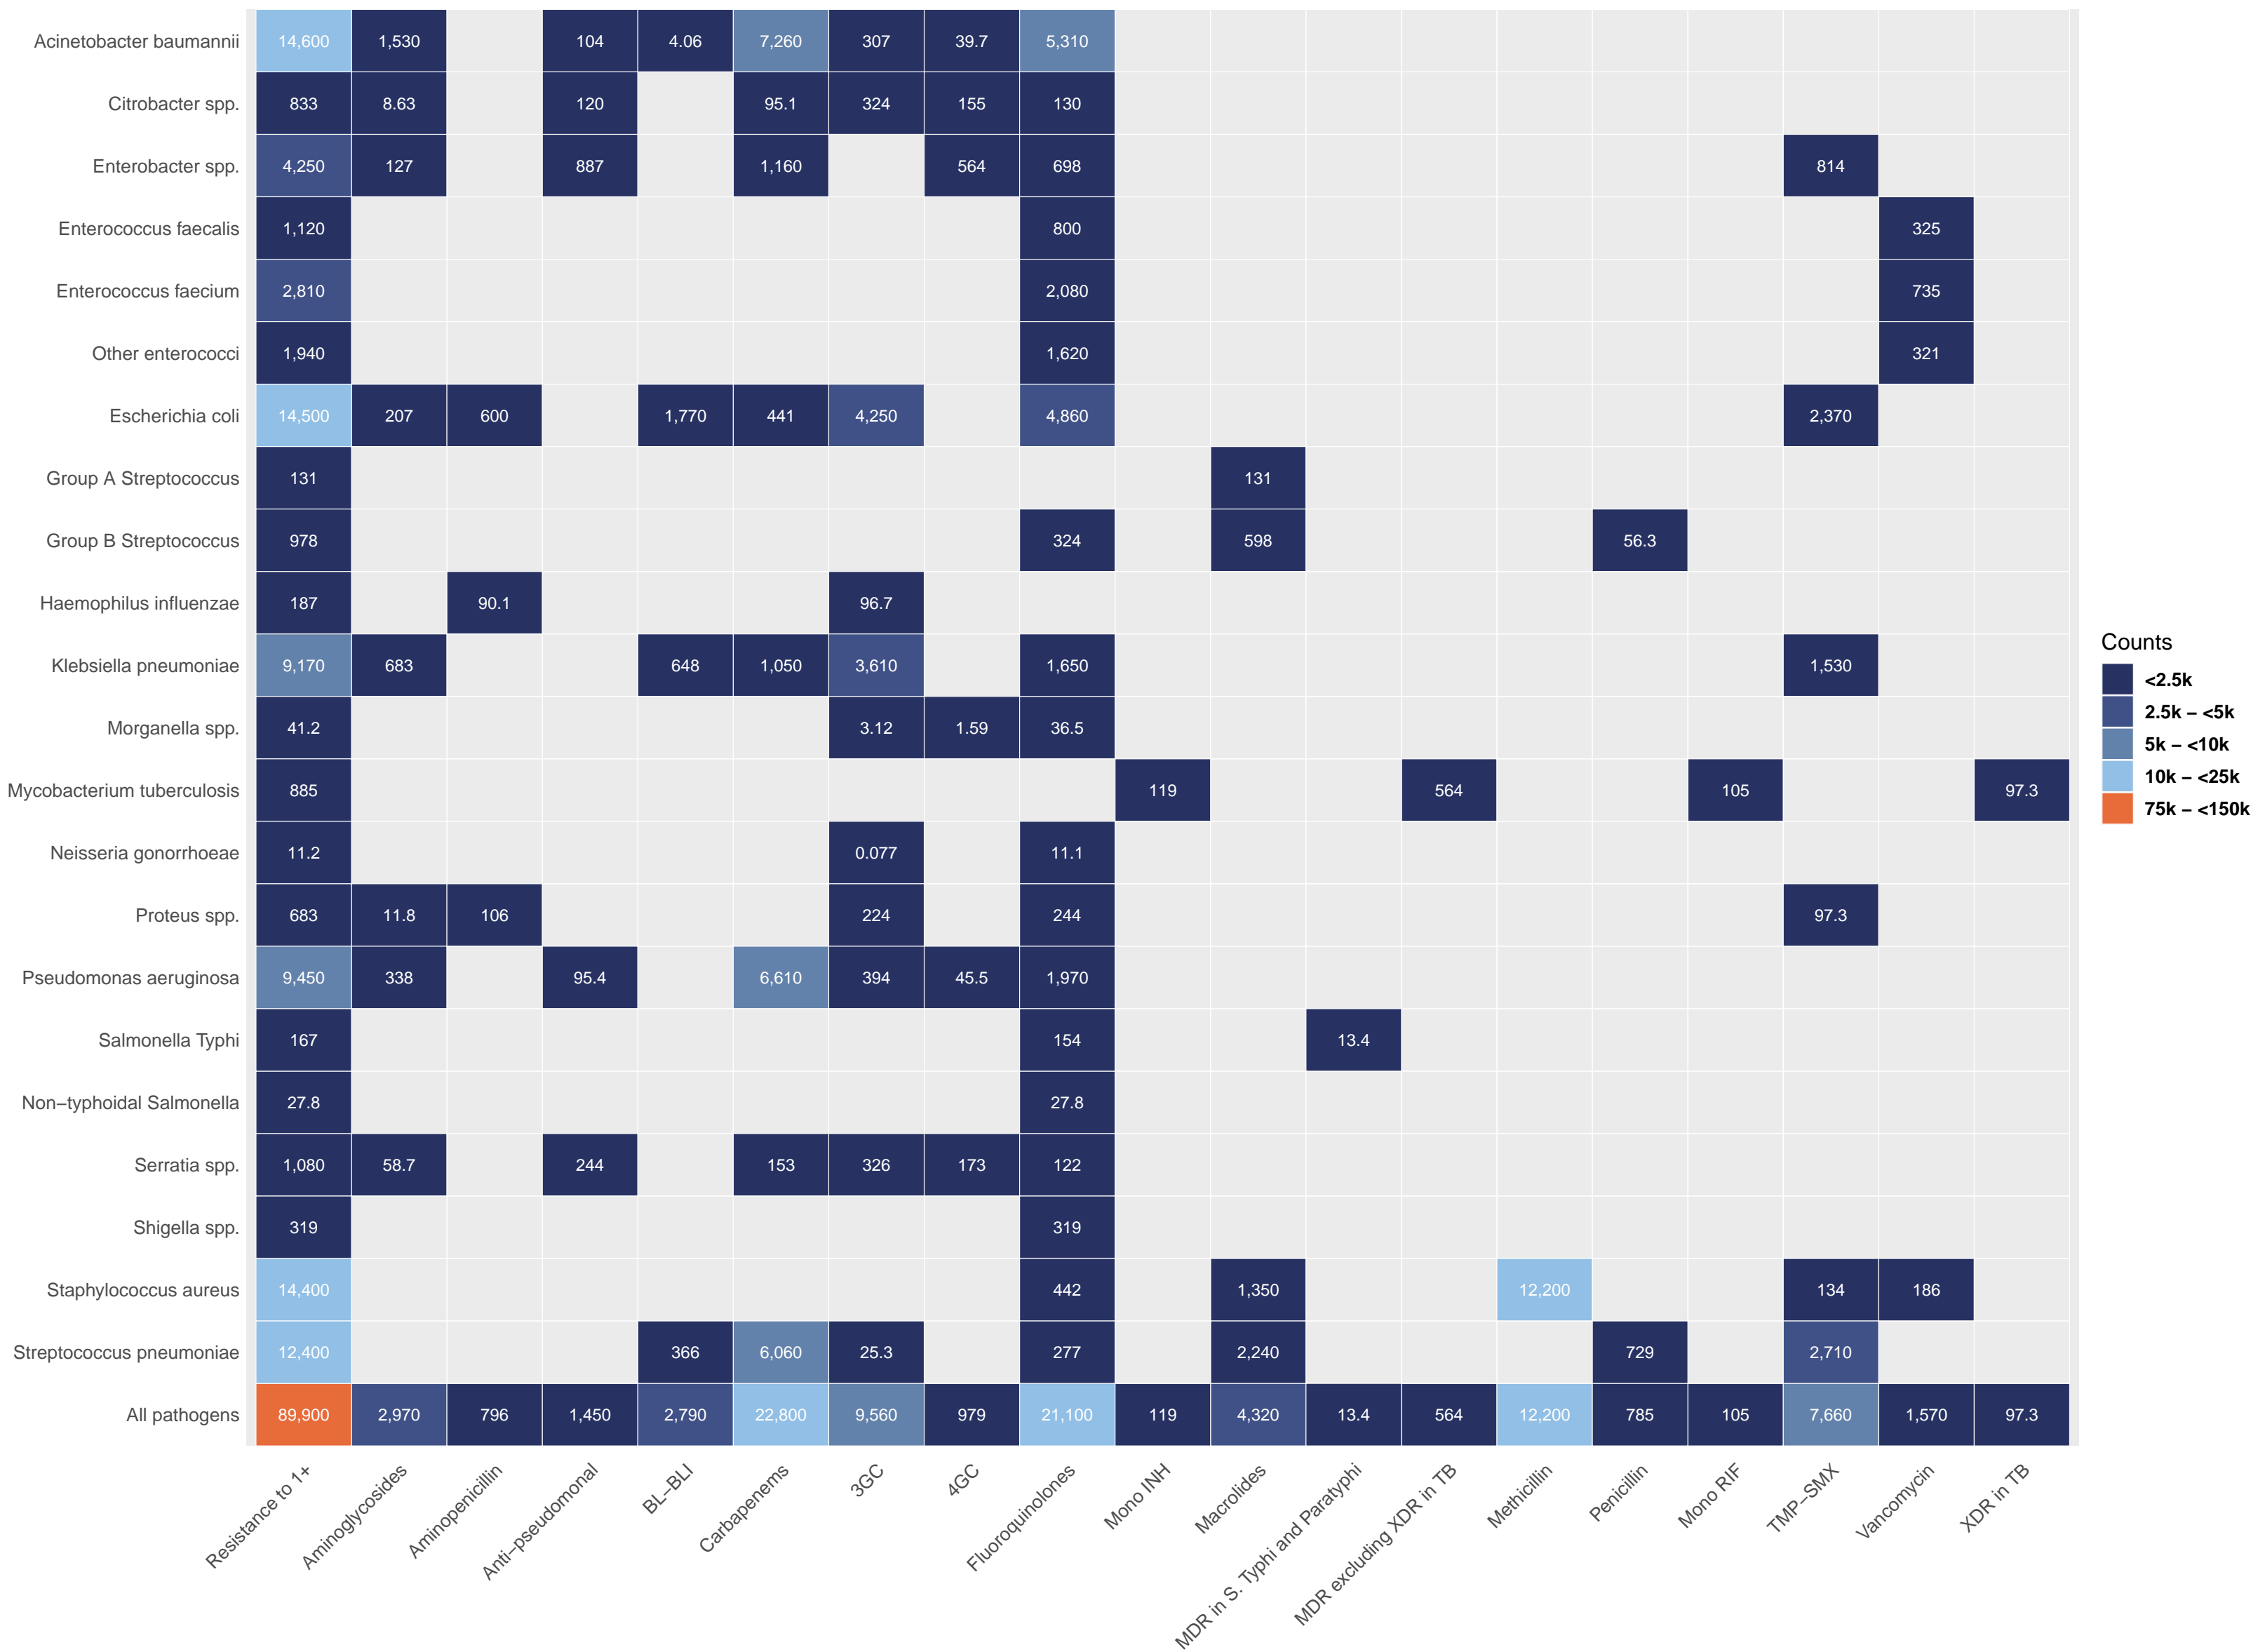

Supplement: mmc2.pdf [file mmc2.pdf]
