# Supplementary material for: The burden of antimicrobial resistance in the Americas in 2019: a cross-country systematic analysis
Source: PubMed Central journal article supplement — Lancet Reg Health Am. 2023 Aug 8;25:100561. doi: 10.1016/j.lana.2023.100561 (PMC10505822; doi:10.1016/j.lana.2023.100561), 2023-08-08

# Resistance to one or more antibiotics AMR-associated mortality rate by DDD per 1000 people, 2019

Correlation coefficient (95% confidence interval) = 0.24 (-0.1,0.53)

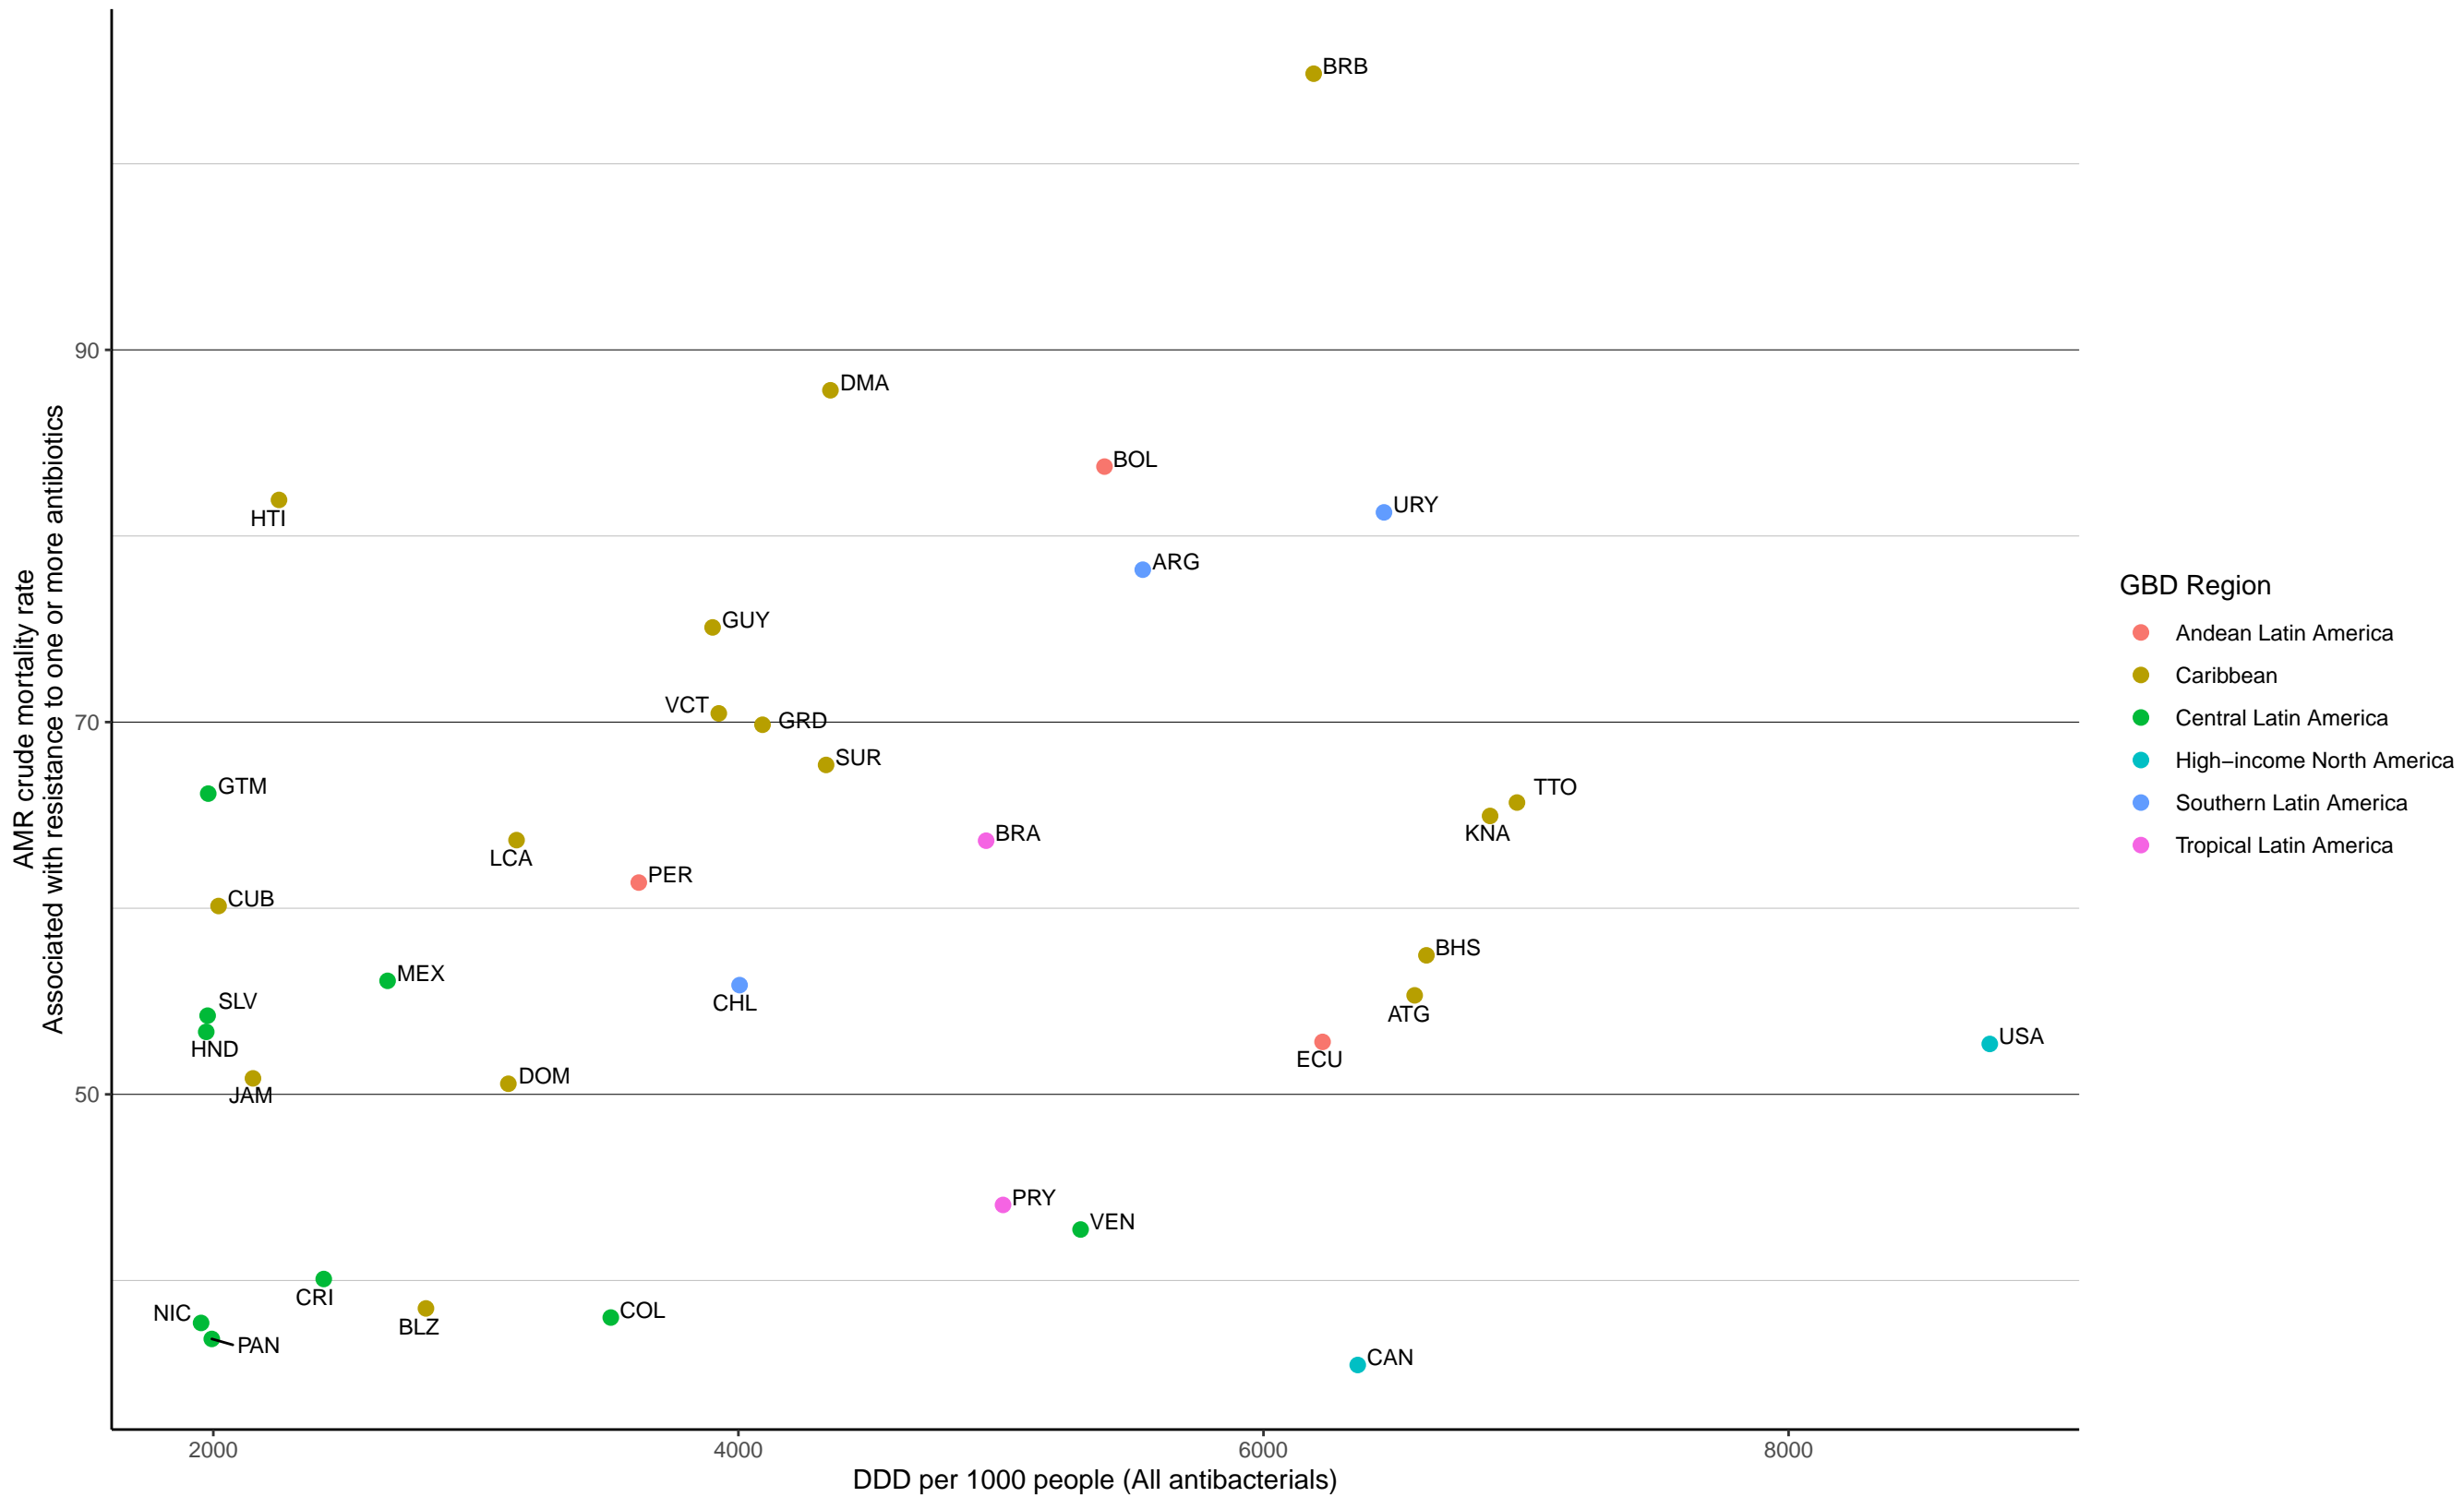

# Resistance to one or more antibiotics AMR–attributable mortality rate by DDD per 1000 people, 2019

Correlation coefficient (95% confidence interval) = 0.22 (−0.12,0.52)

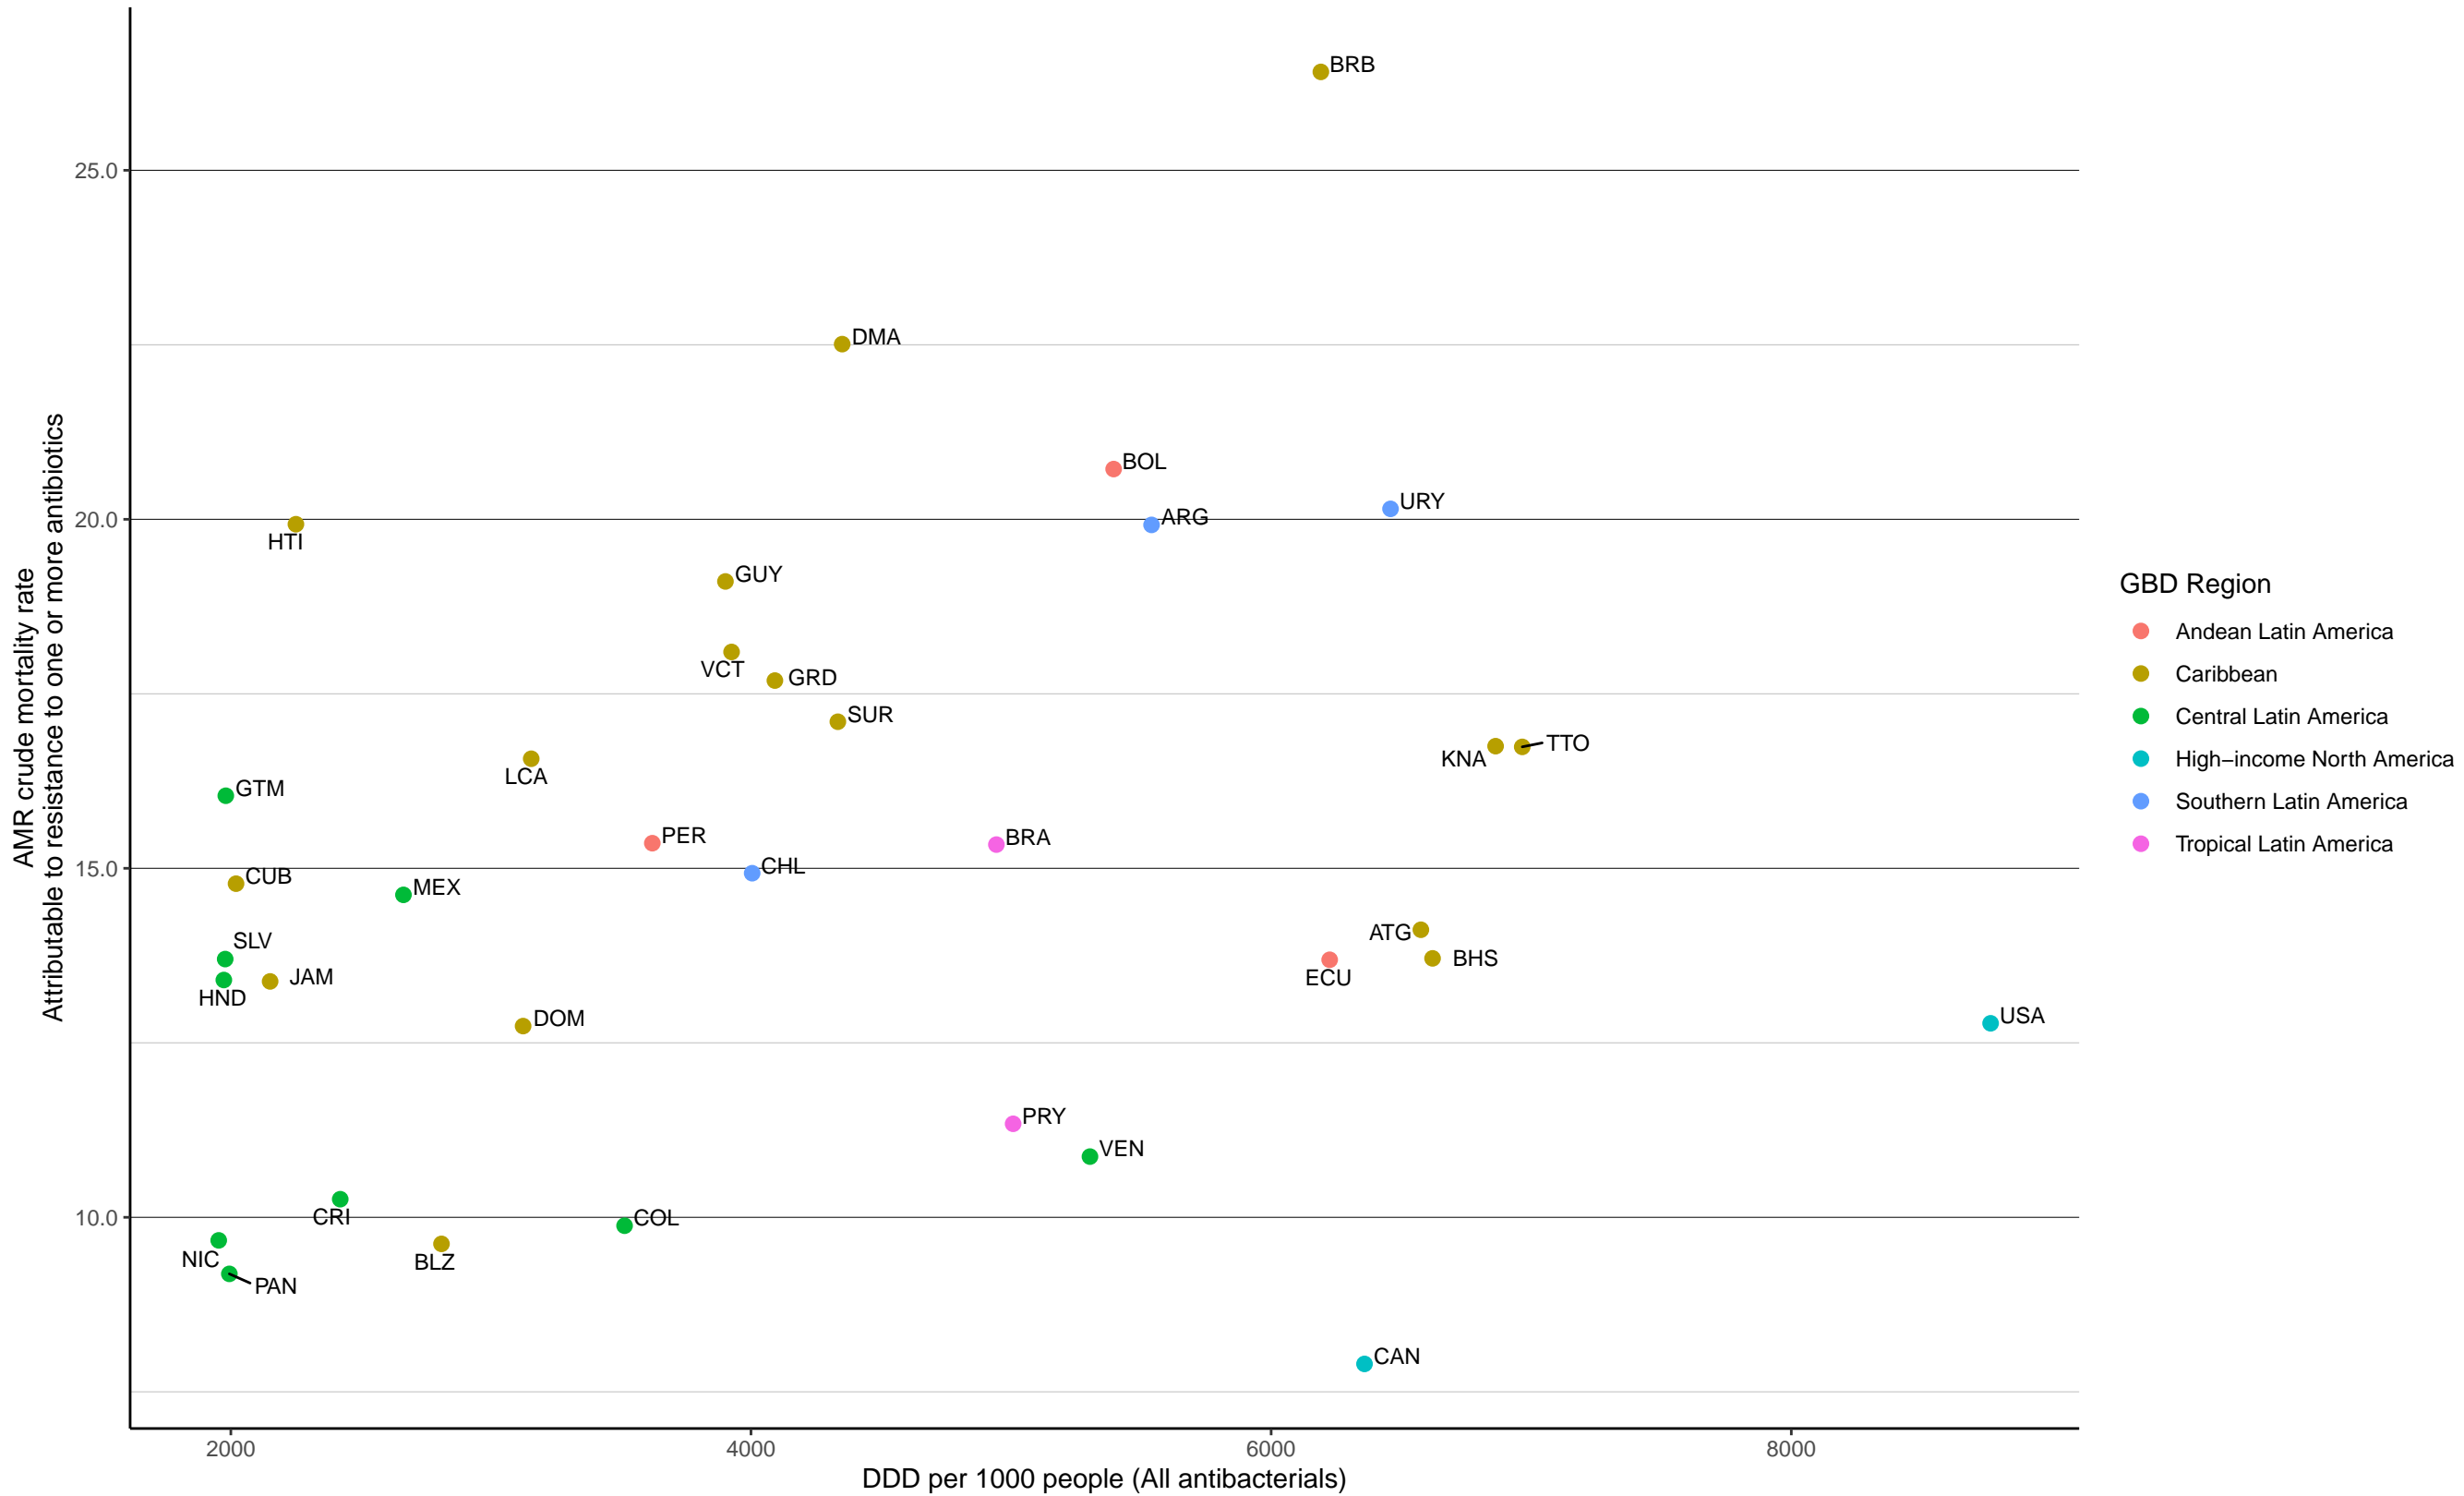

# Aminoglycoside AMR-associated mortality rate by J01G DDD per 1000 people, 2019

Correlation coefficient (95% confidence interval) = 0.29 (-0.05,0.57)

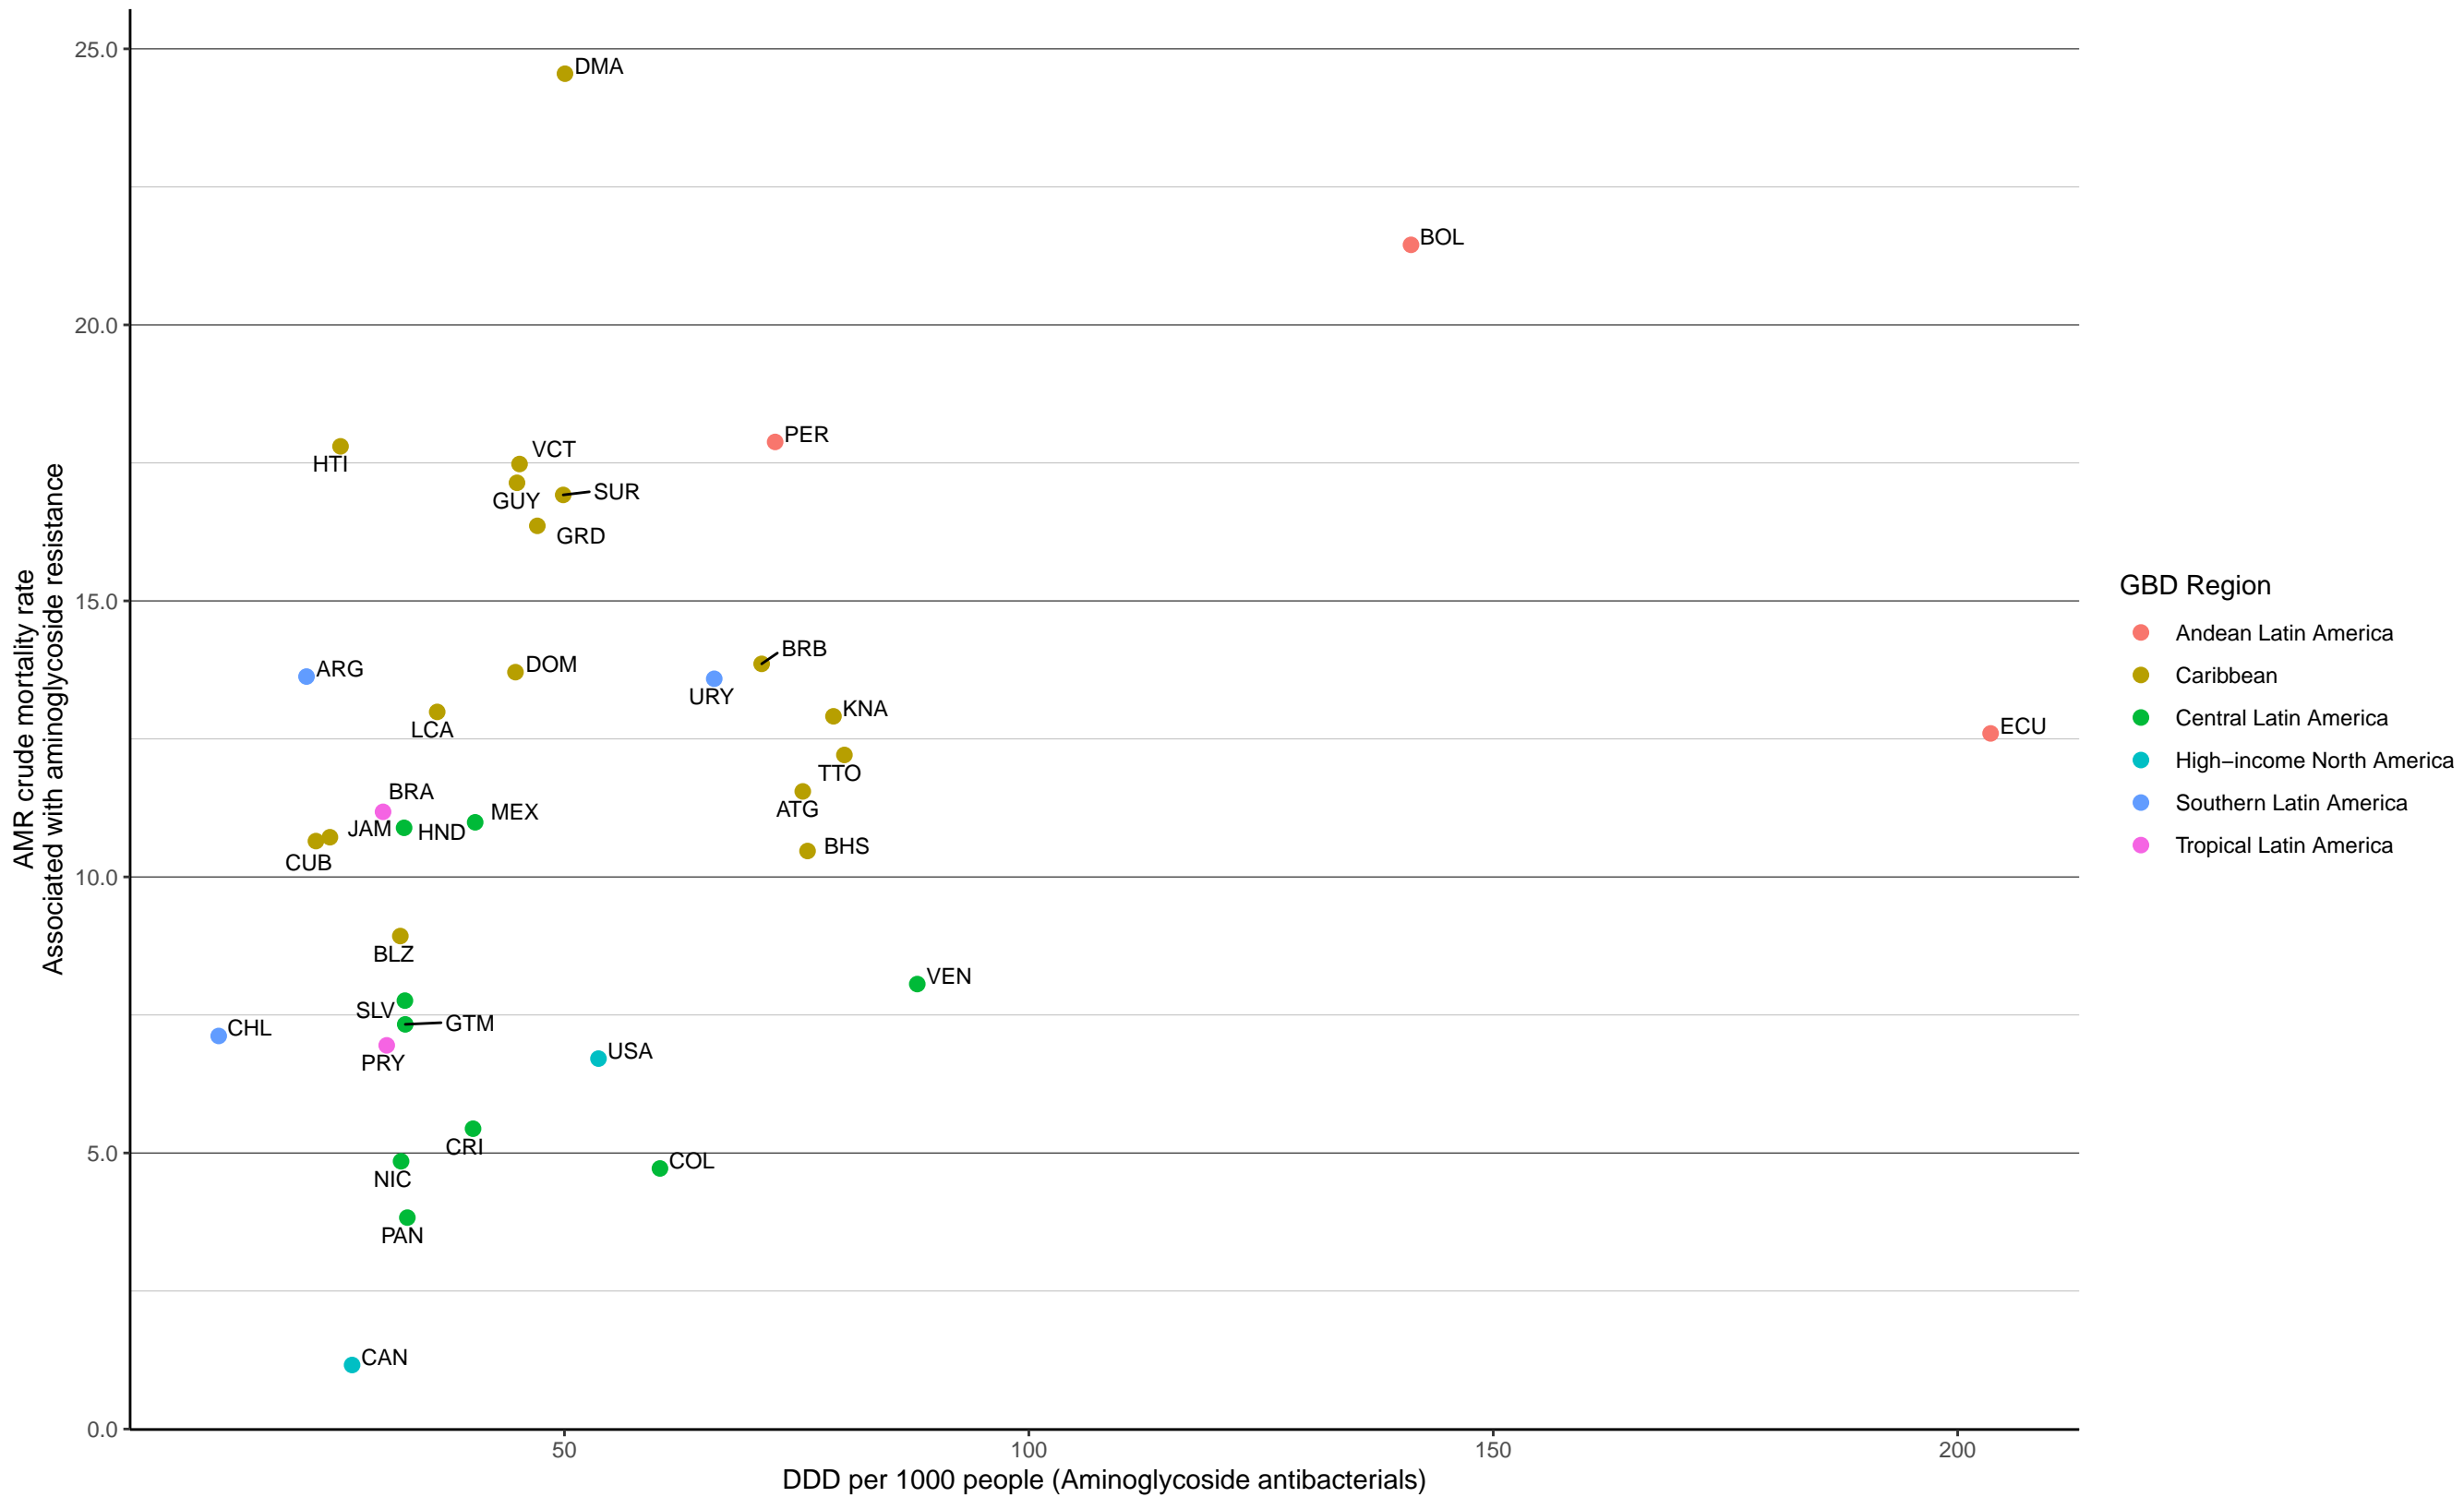

# Aminoglycoside AMR—attributable mortality rate by J01G DDD per 1000 people, 2019

Correlation coefficient (95% confidence interval) = 0.31 (-0.03,0.58)

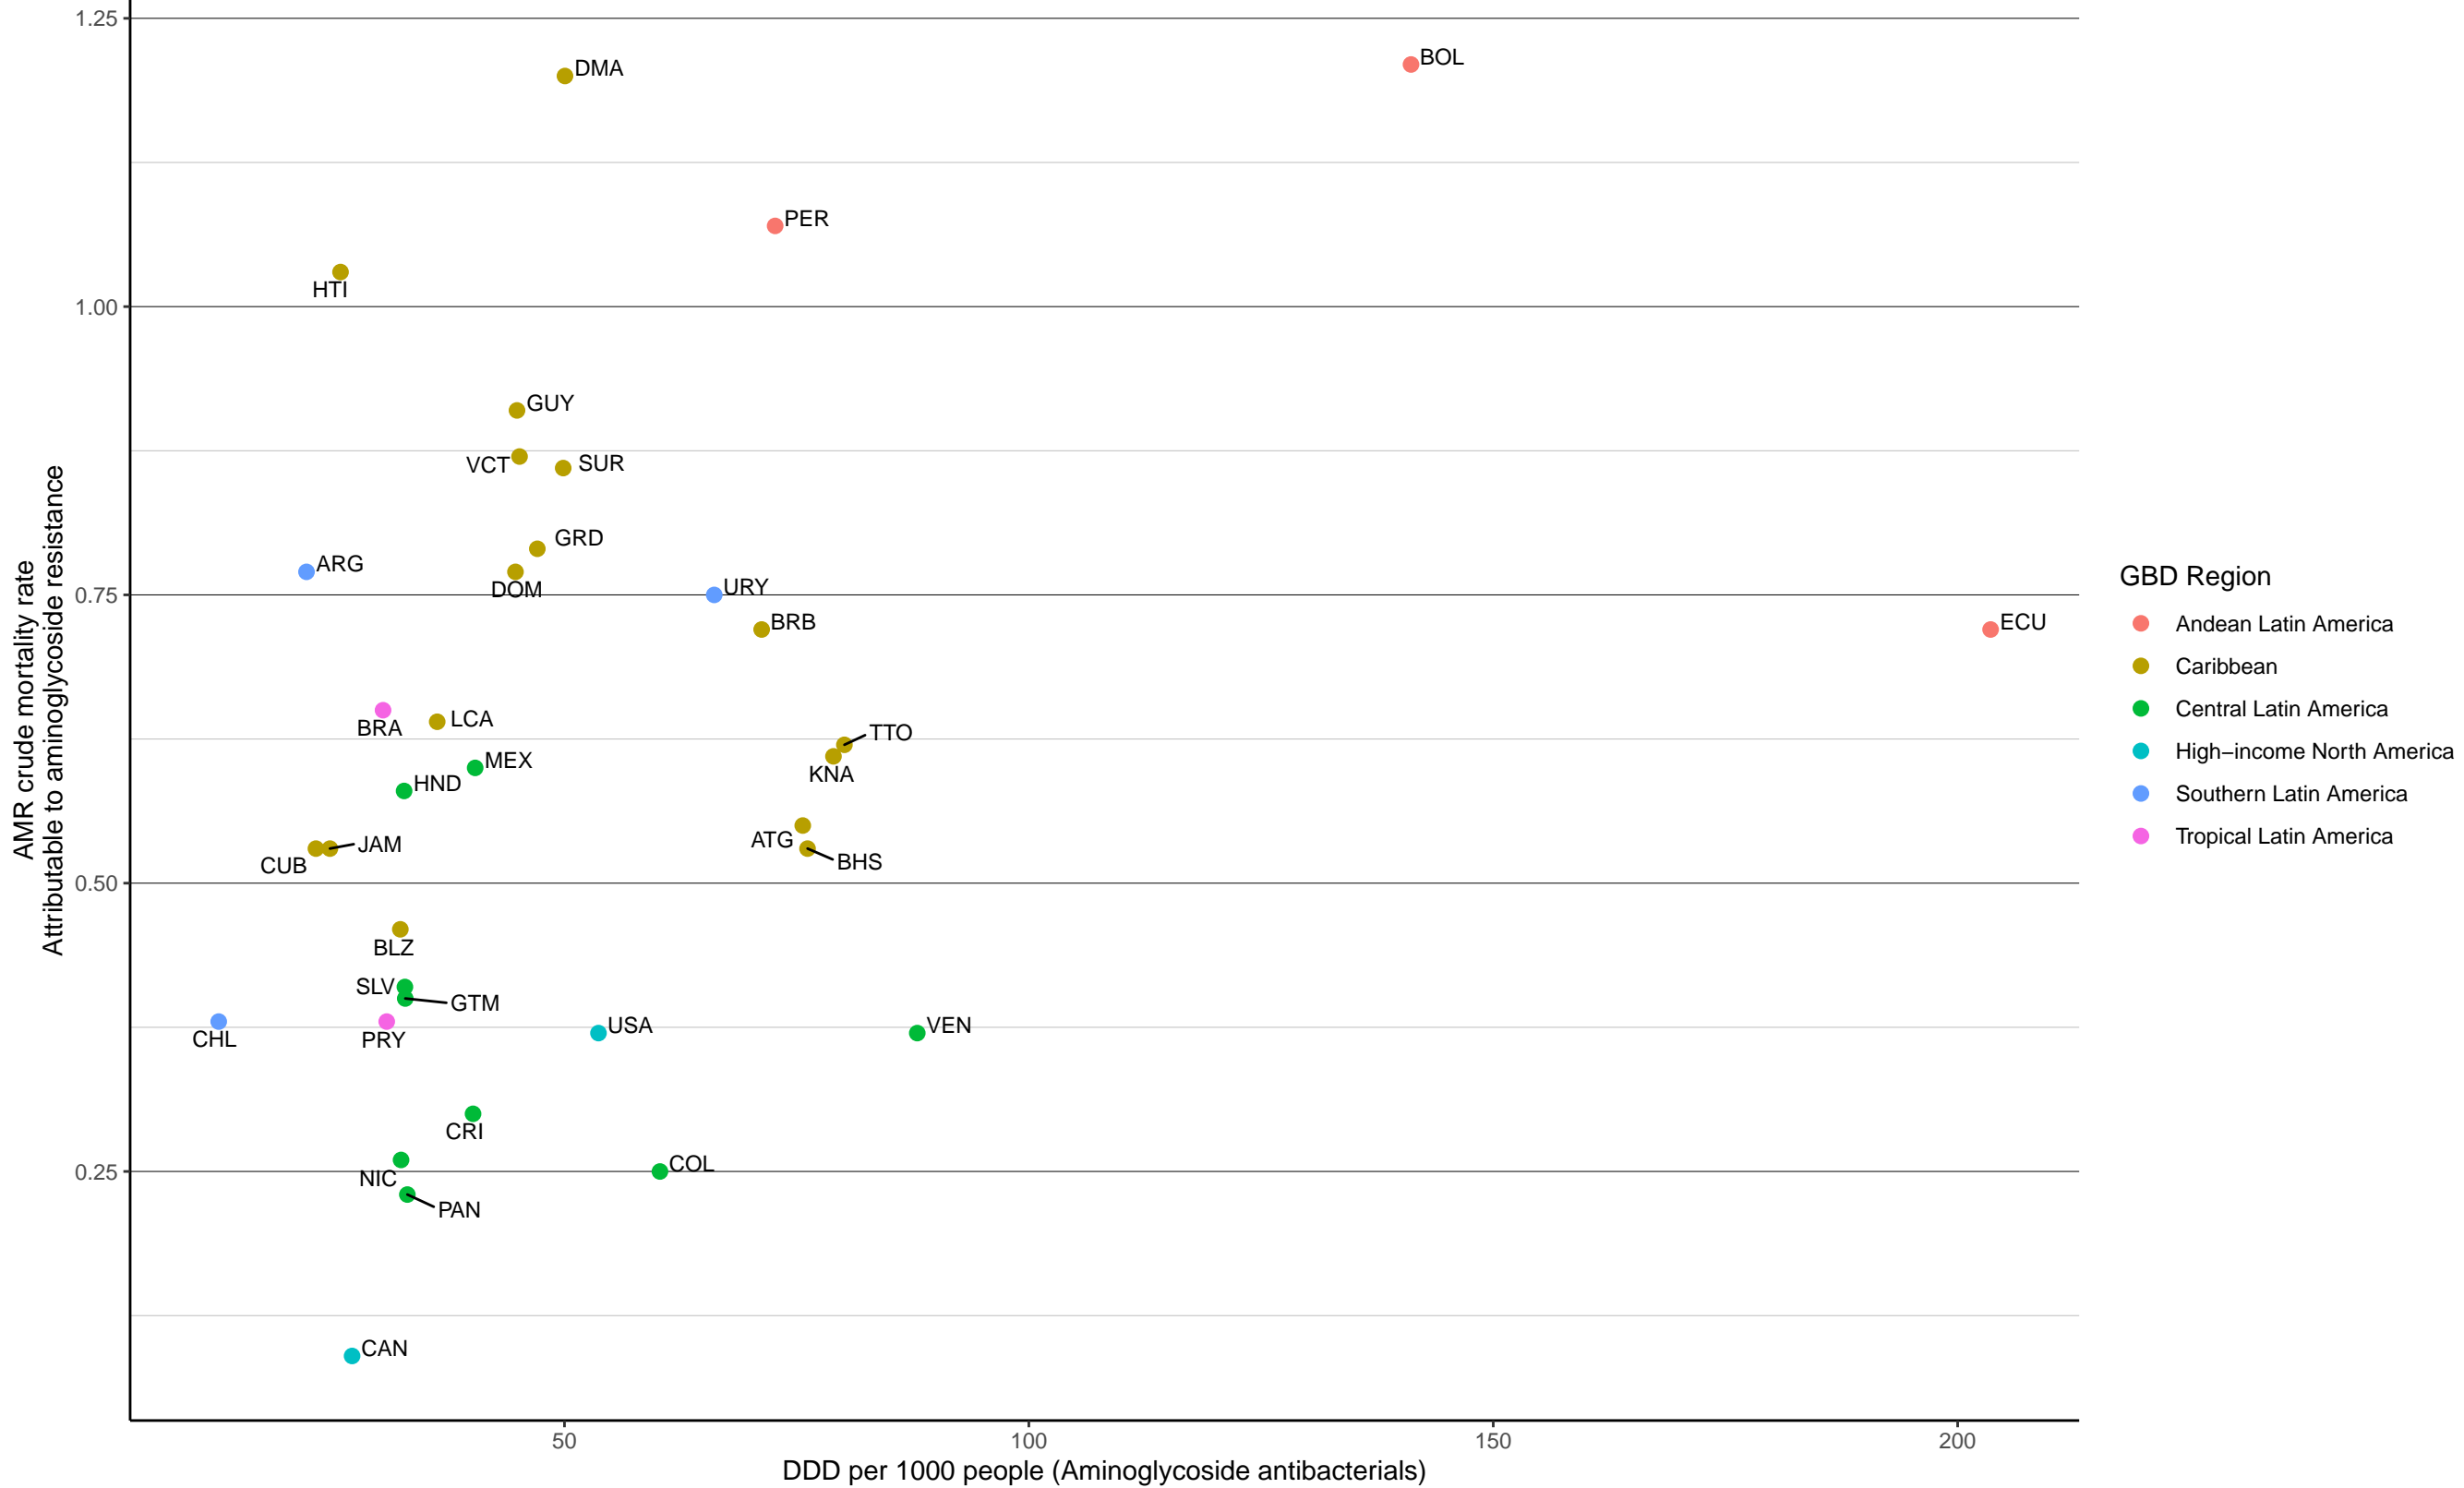

# Aminopenicillin AMR-associated mortality rate by J01C DDD per 1000 people, 2019

Correlation coefficient (95% confidence interval) = 0.38 (0.06,0.64)

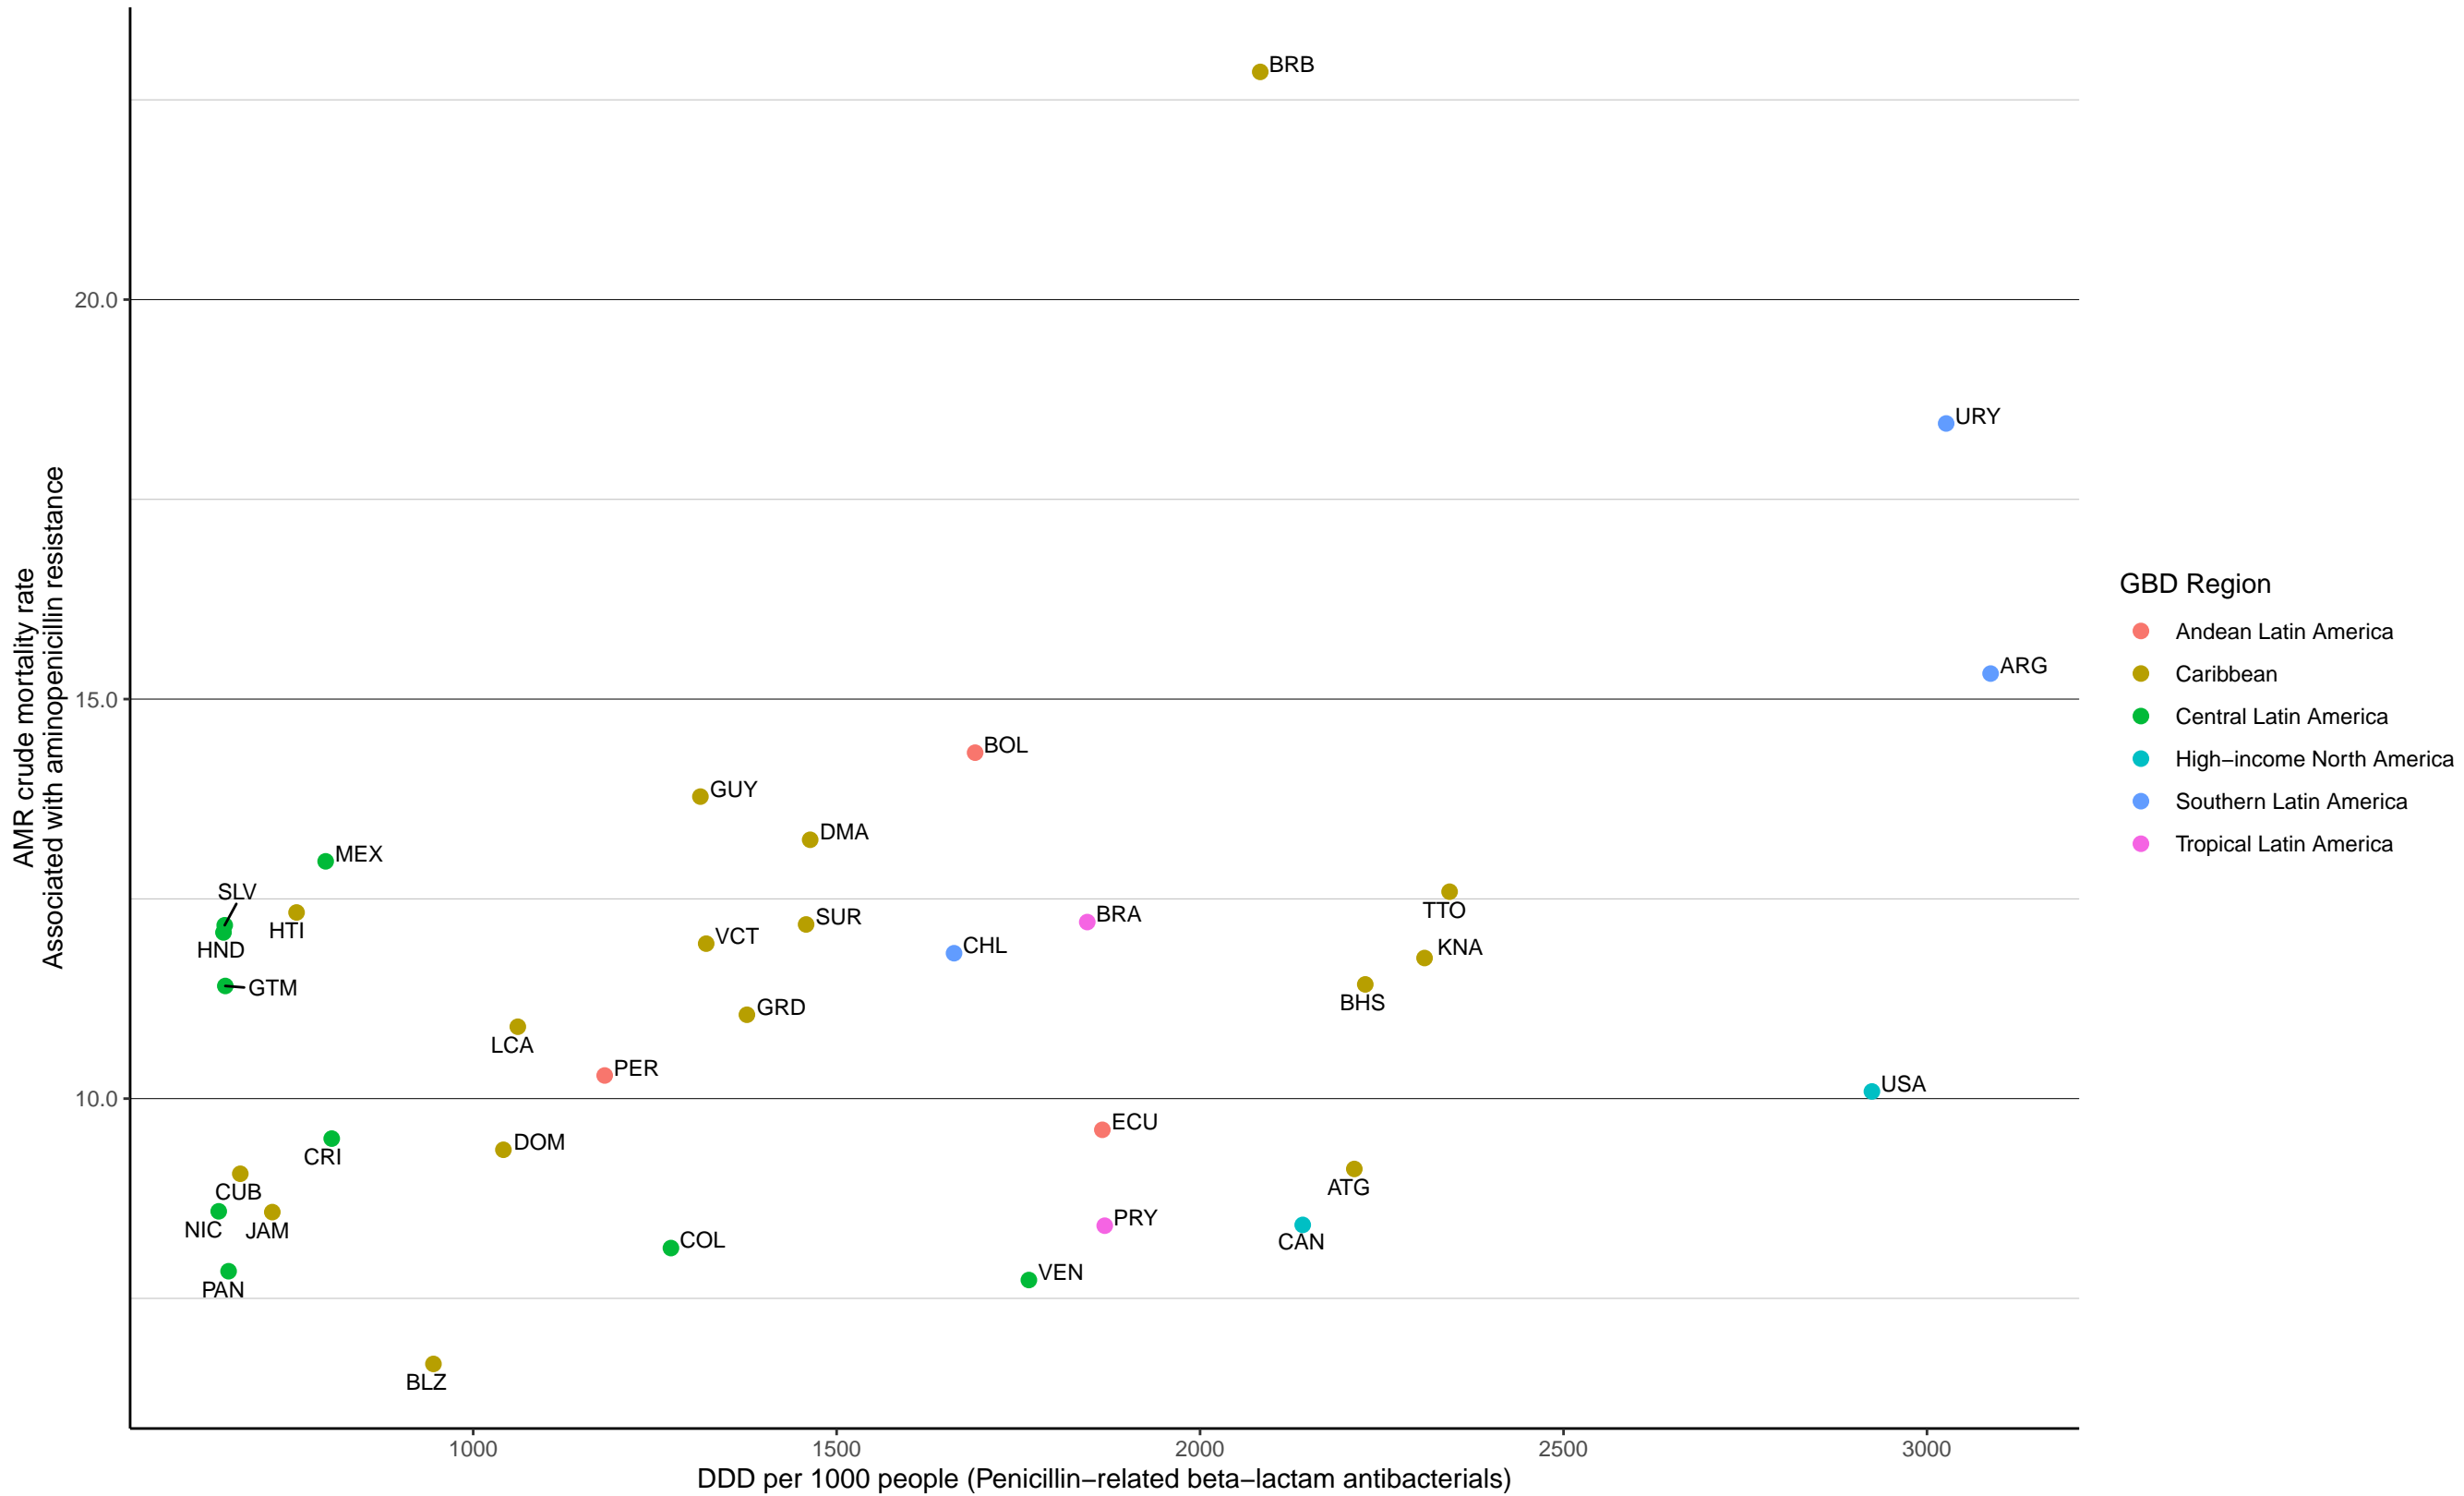

# Aminopenicillin AMR-attributable mortality rate by J01C DDD per 1000 people, 2019

Correlation coefficient (95% confidence interval) = 0.44 (0.13,0.68)

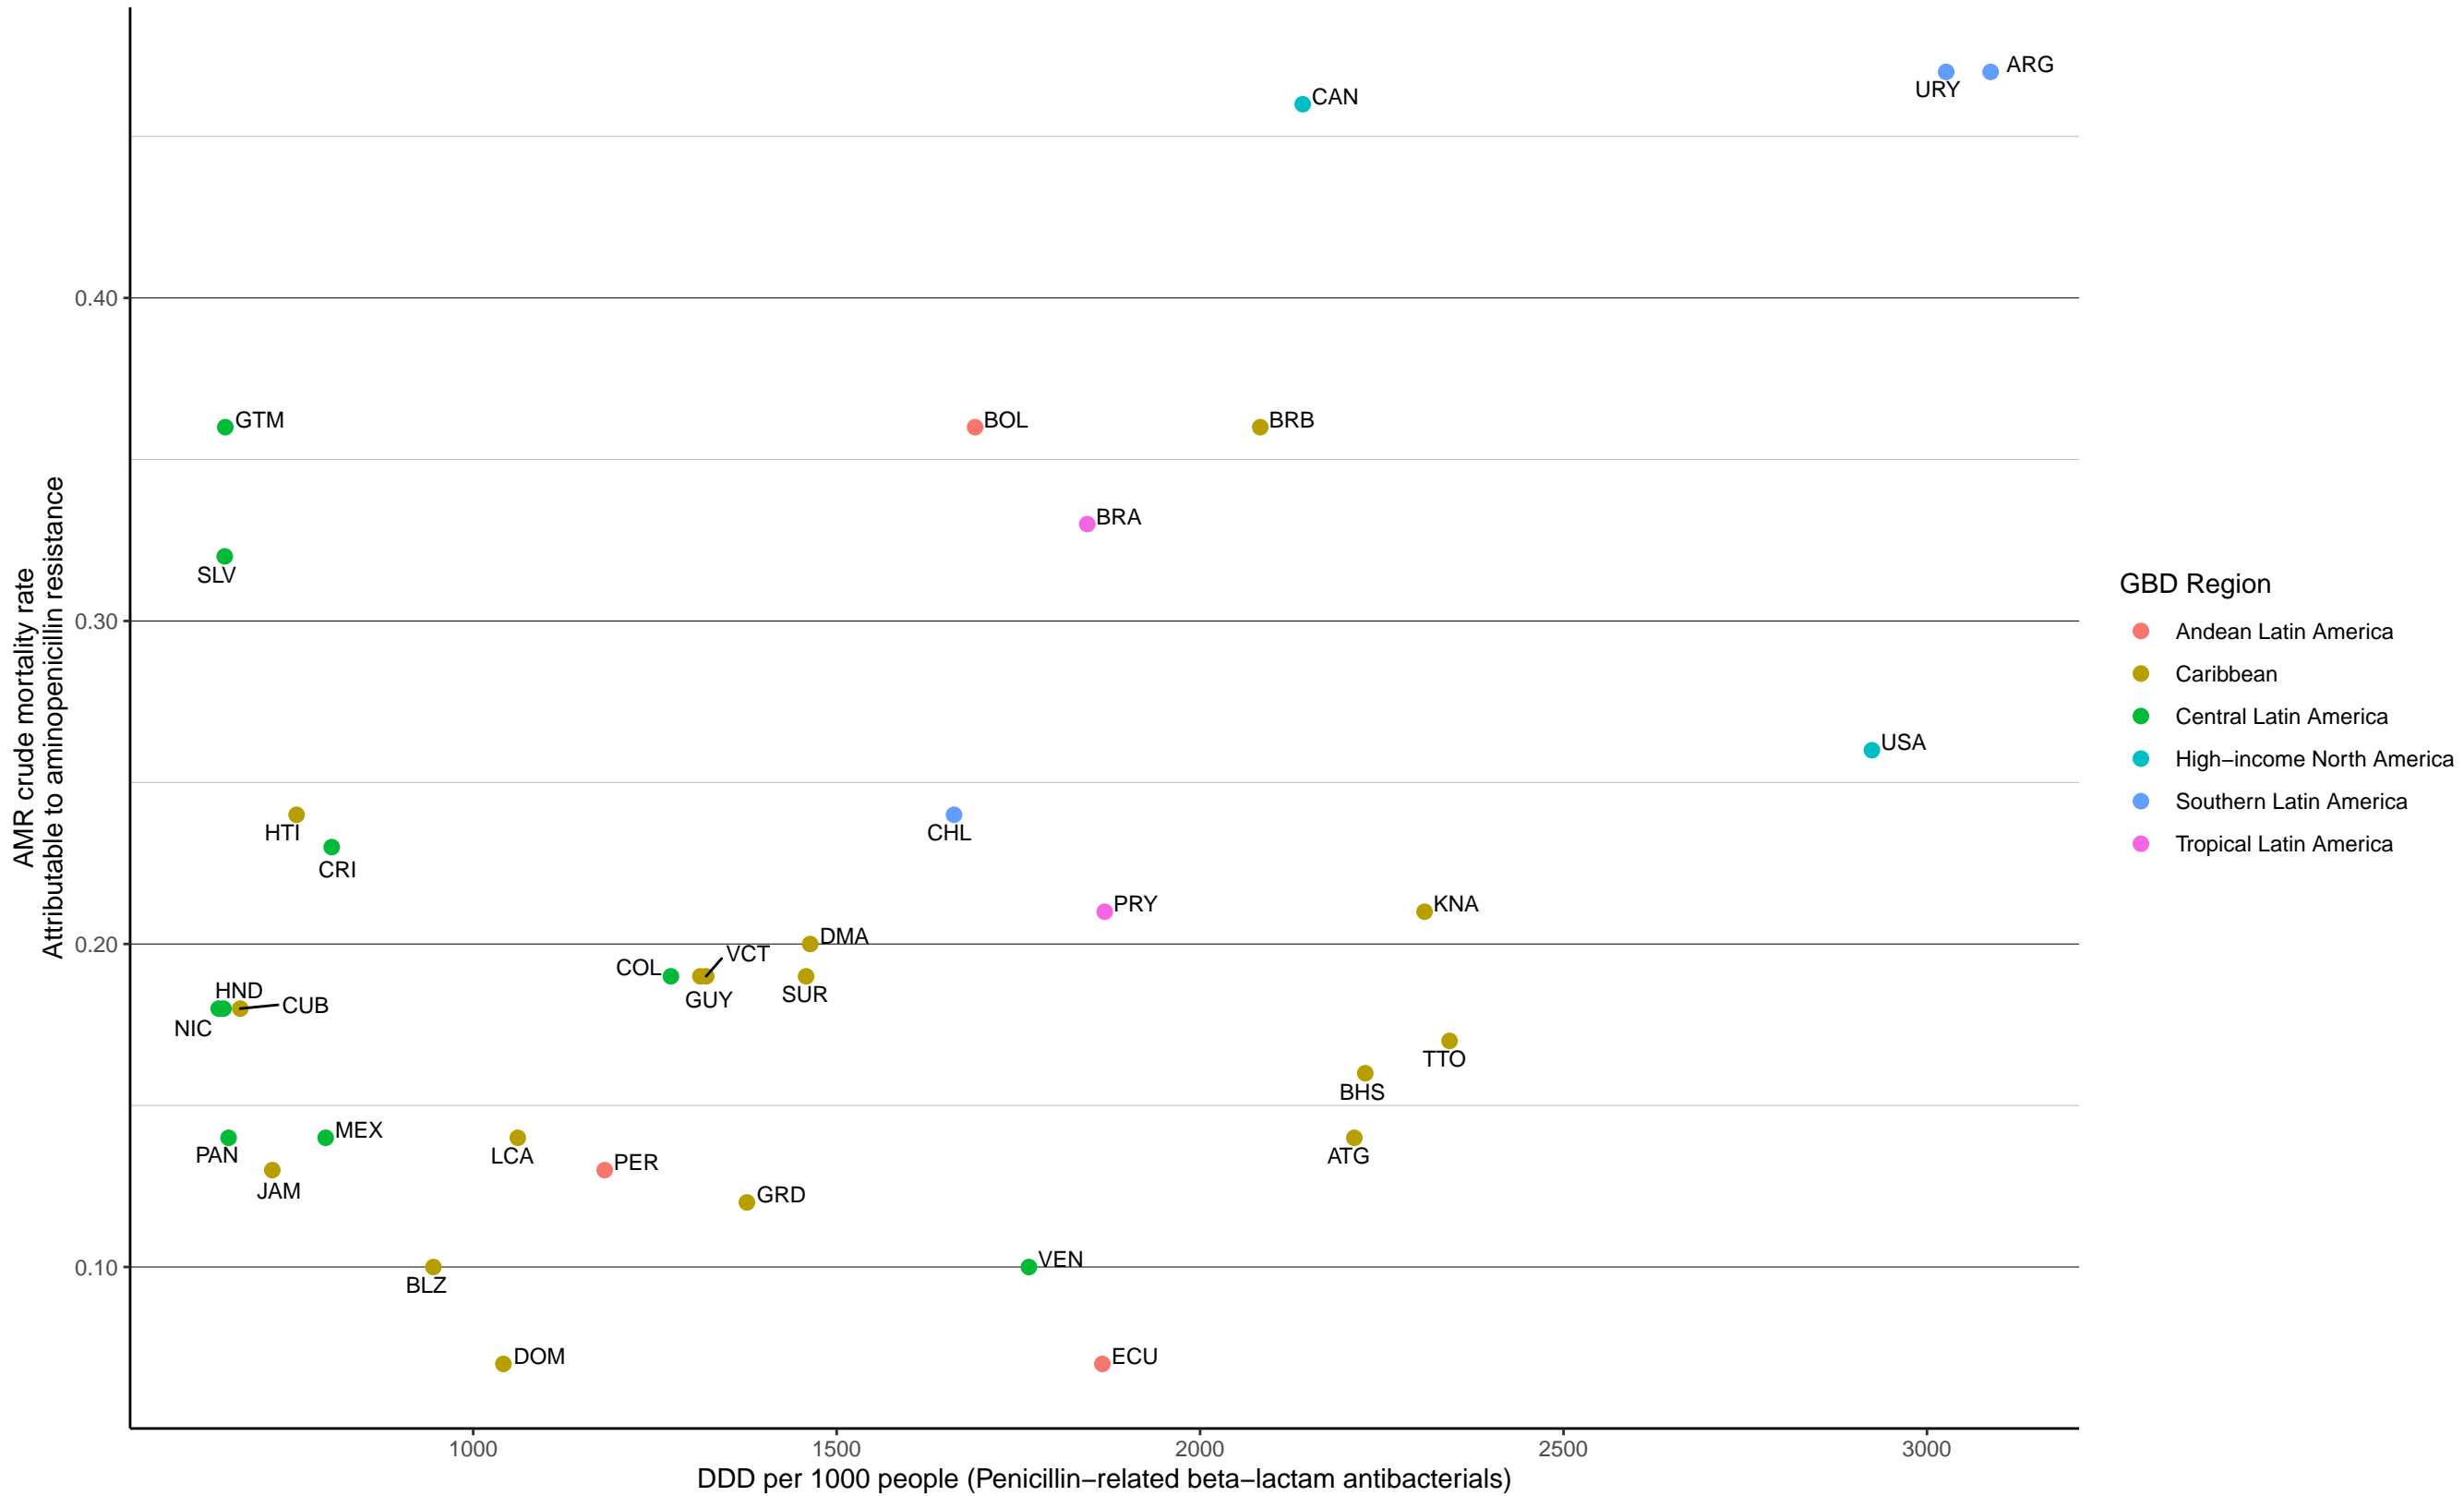

# Anti-pseudomonal penicillin/Beta-Lactamase inhibitor AMR-associated mortality rate by J01C DDD per 1000 people, 2019

Correlation coefficient (95% confidence interval) = 0.08 (-0.26,0.4)

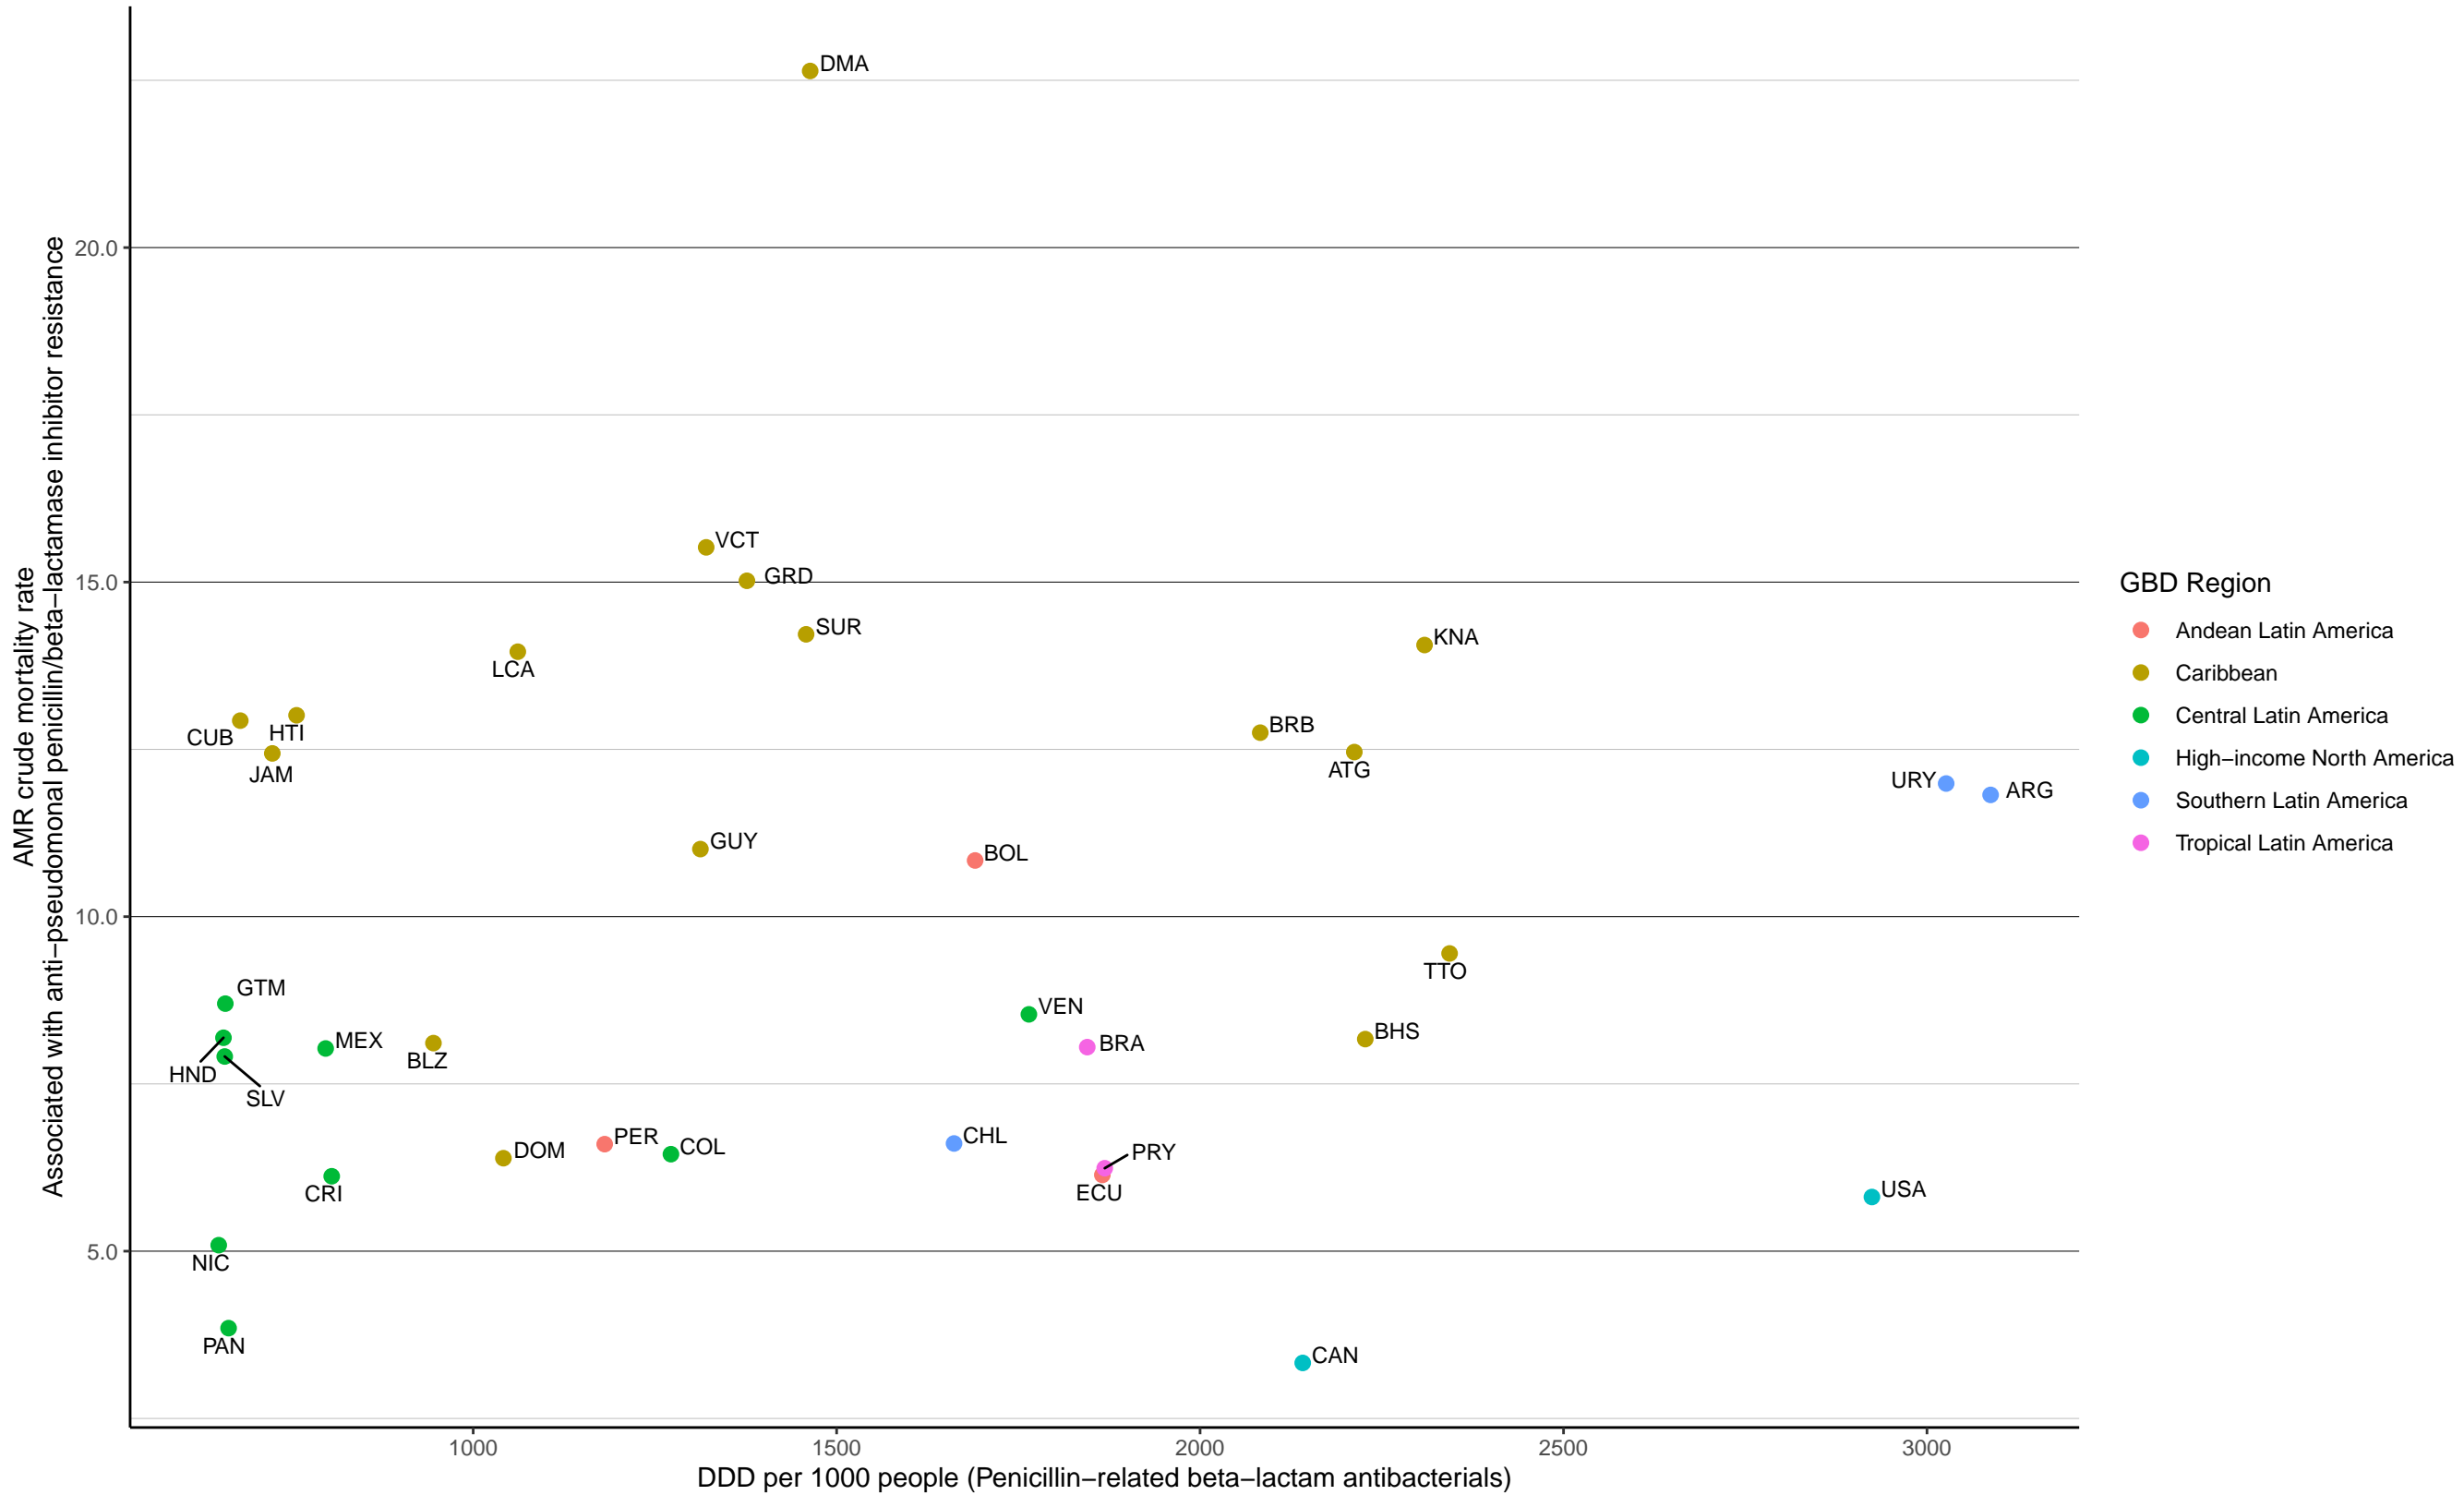

# Anti-pseudomonal penicillin/Beta-Lactamase inhibitor AMR-attributable mortality rate by J01C DDD per 1000 people, 2019

Correlation coefficient (95% confidence interval) = 0 (-0.34,0.33)

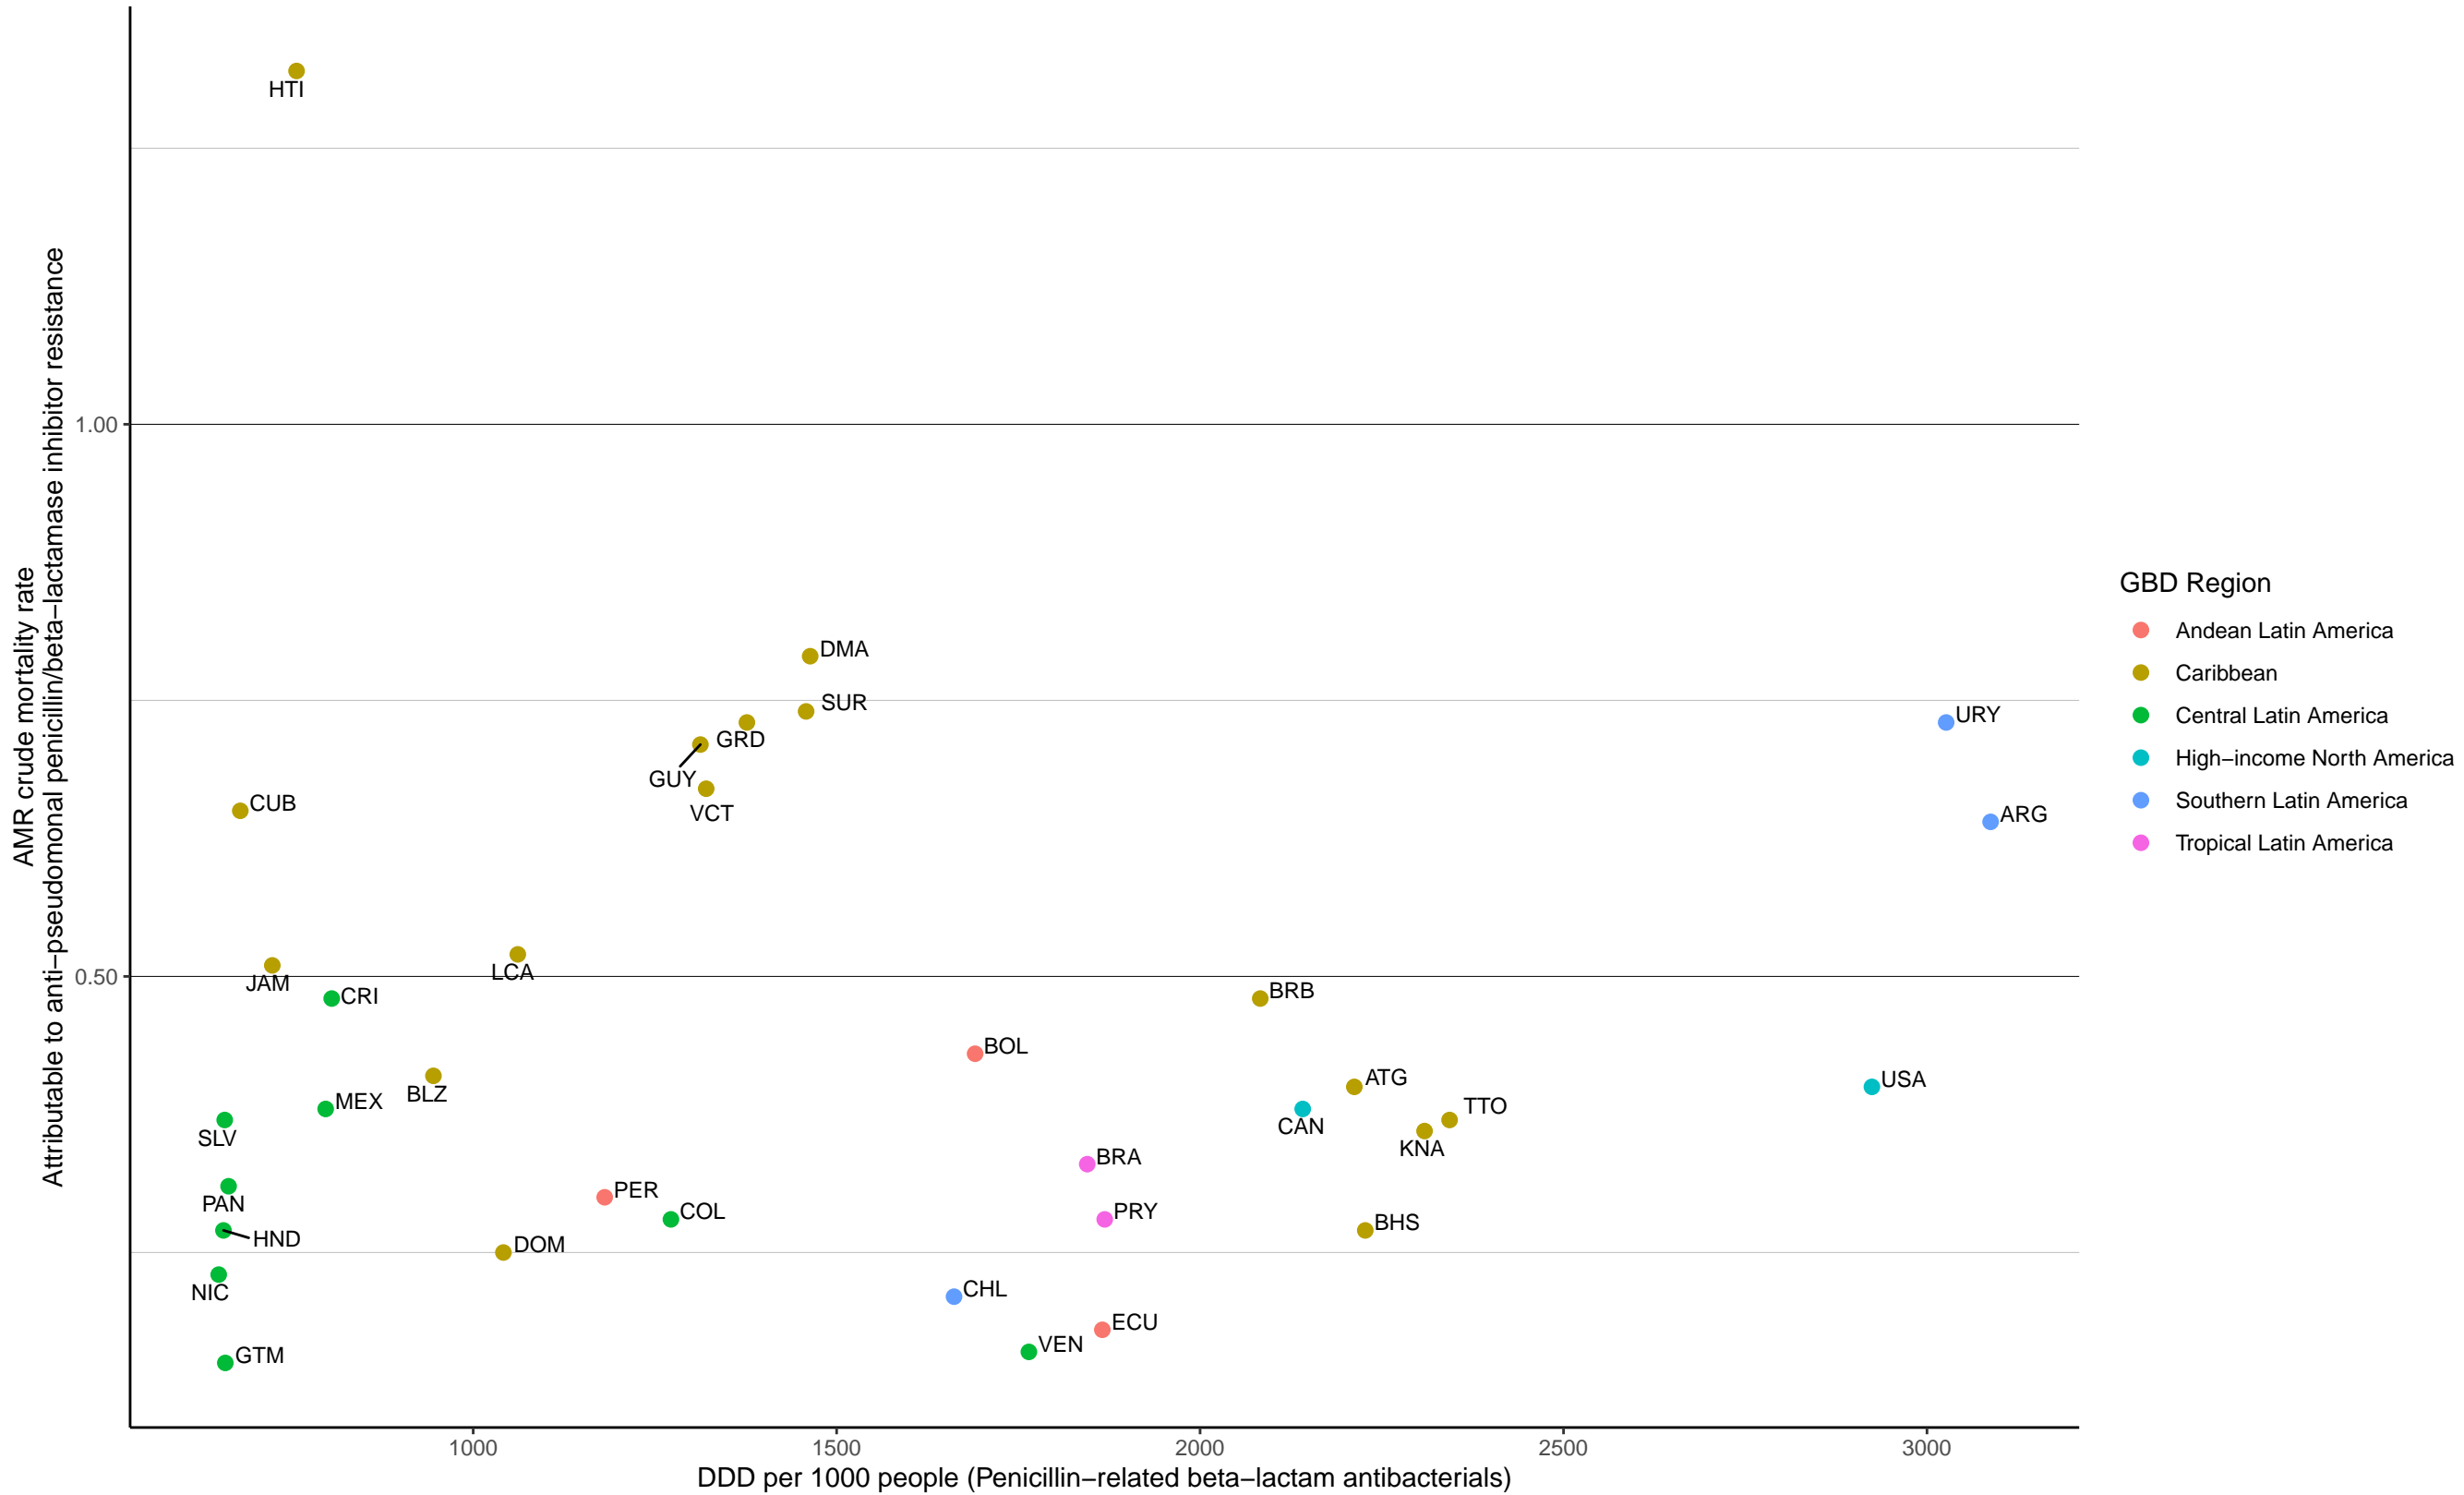



# Beta Lactam/Beta-lactamase inhibitor AMR-associated mortality rate by J01C DDD per 1000 people, 2019

Correlation coefficient (95% confidence interval) = 0.11 (-0.23,0.43)

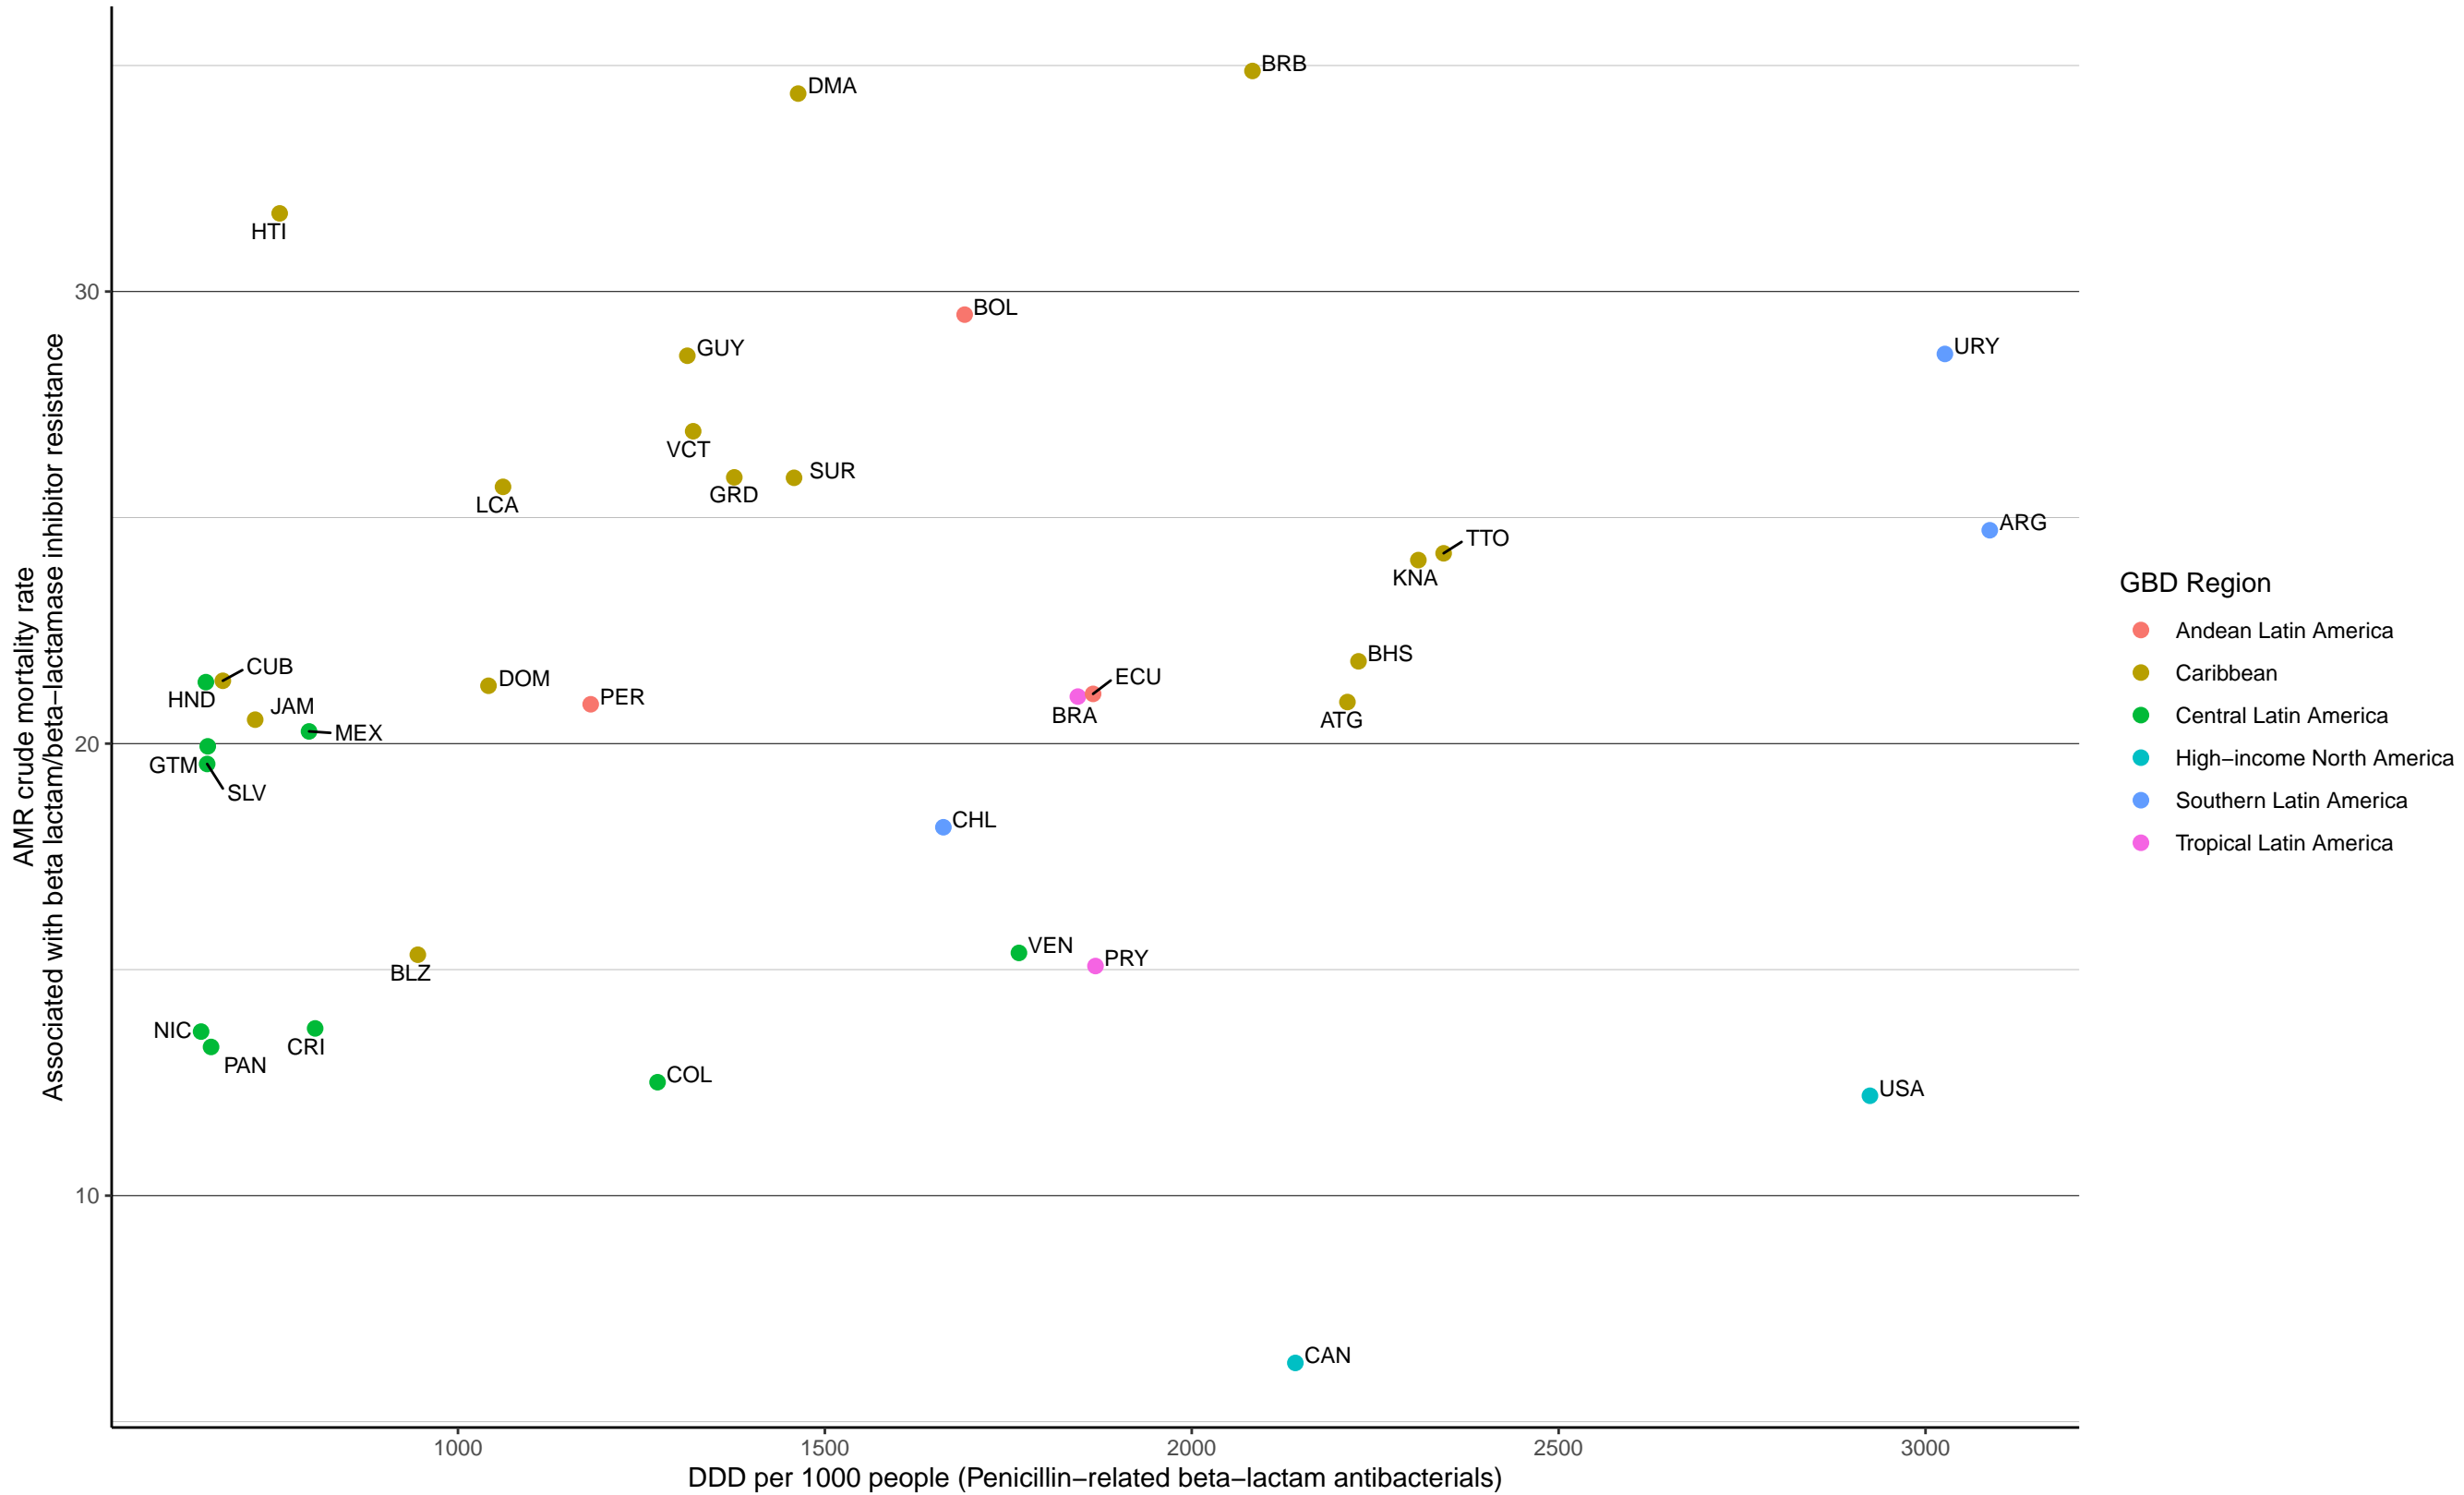

# Beta Lactam/Beta-lactamase inhibitor AMR-attributable mortality rate by J01C DDD per 1000 people, 2019

Correlation coefficient (95% confidence interval) = 0.51 (0.22,0.72)

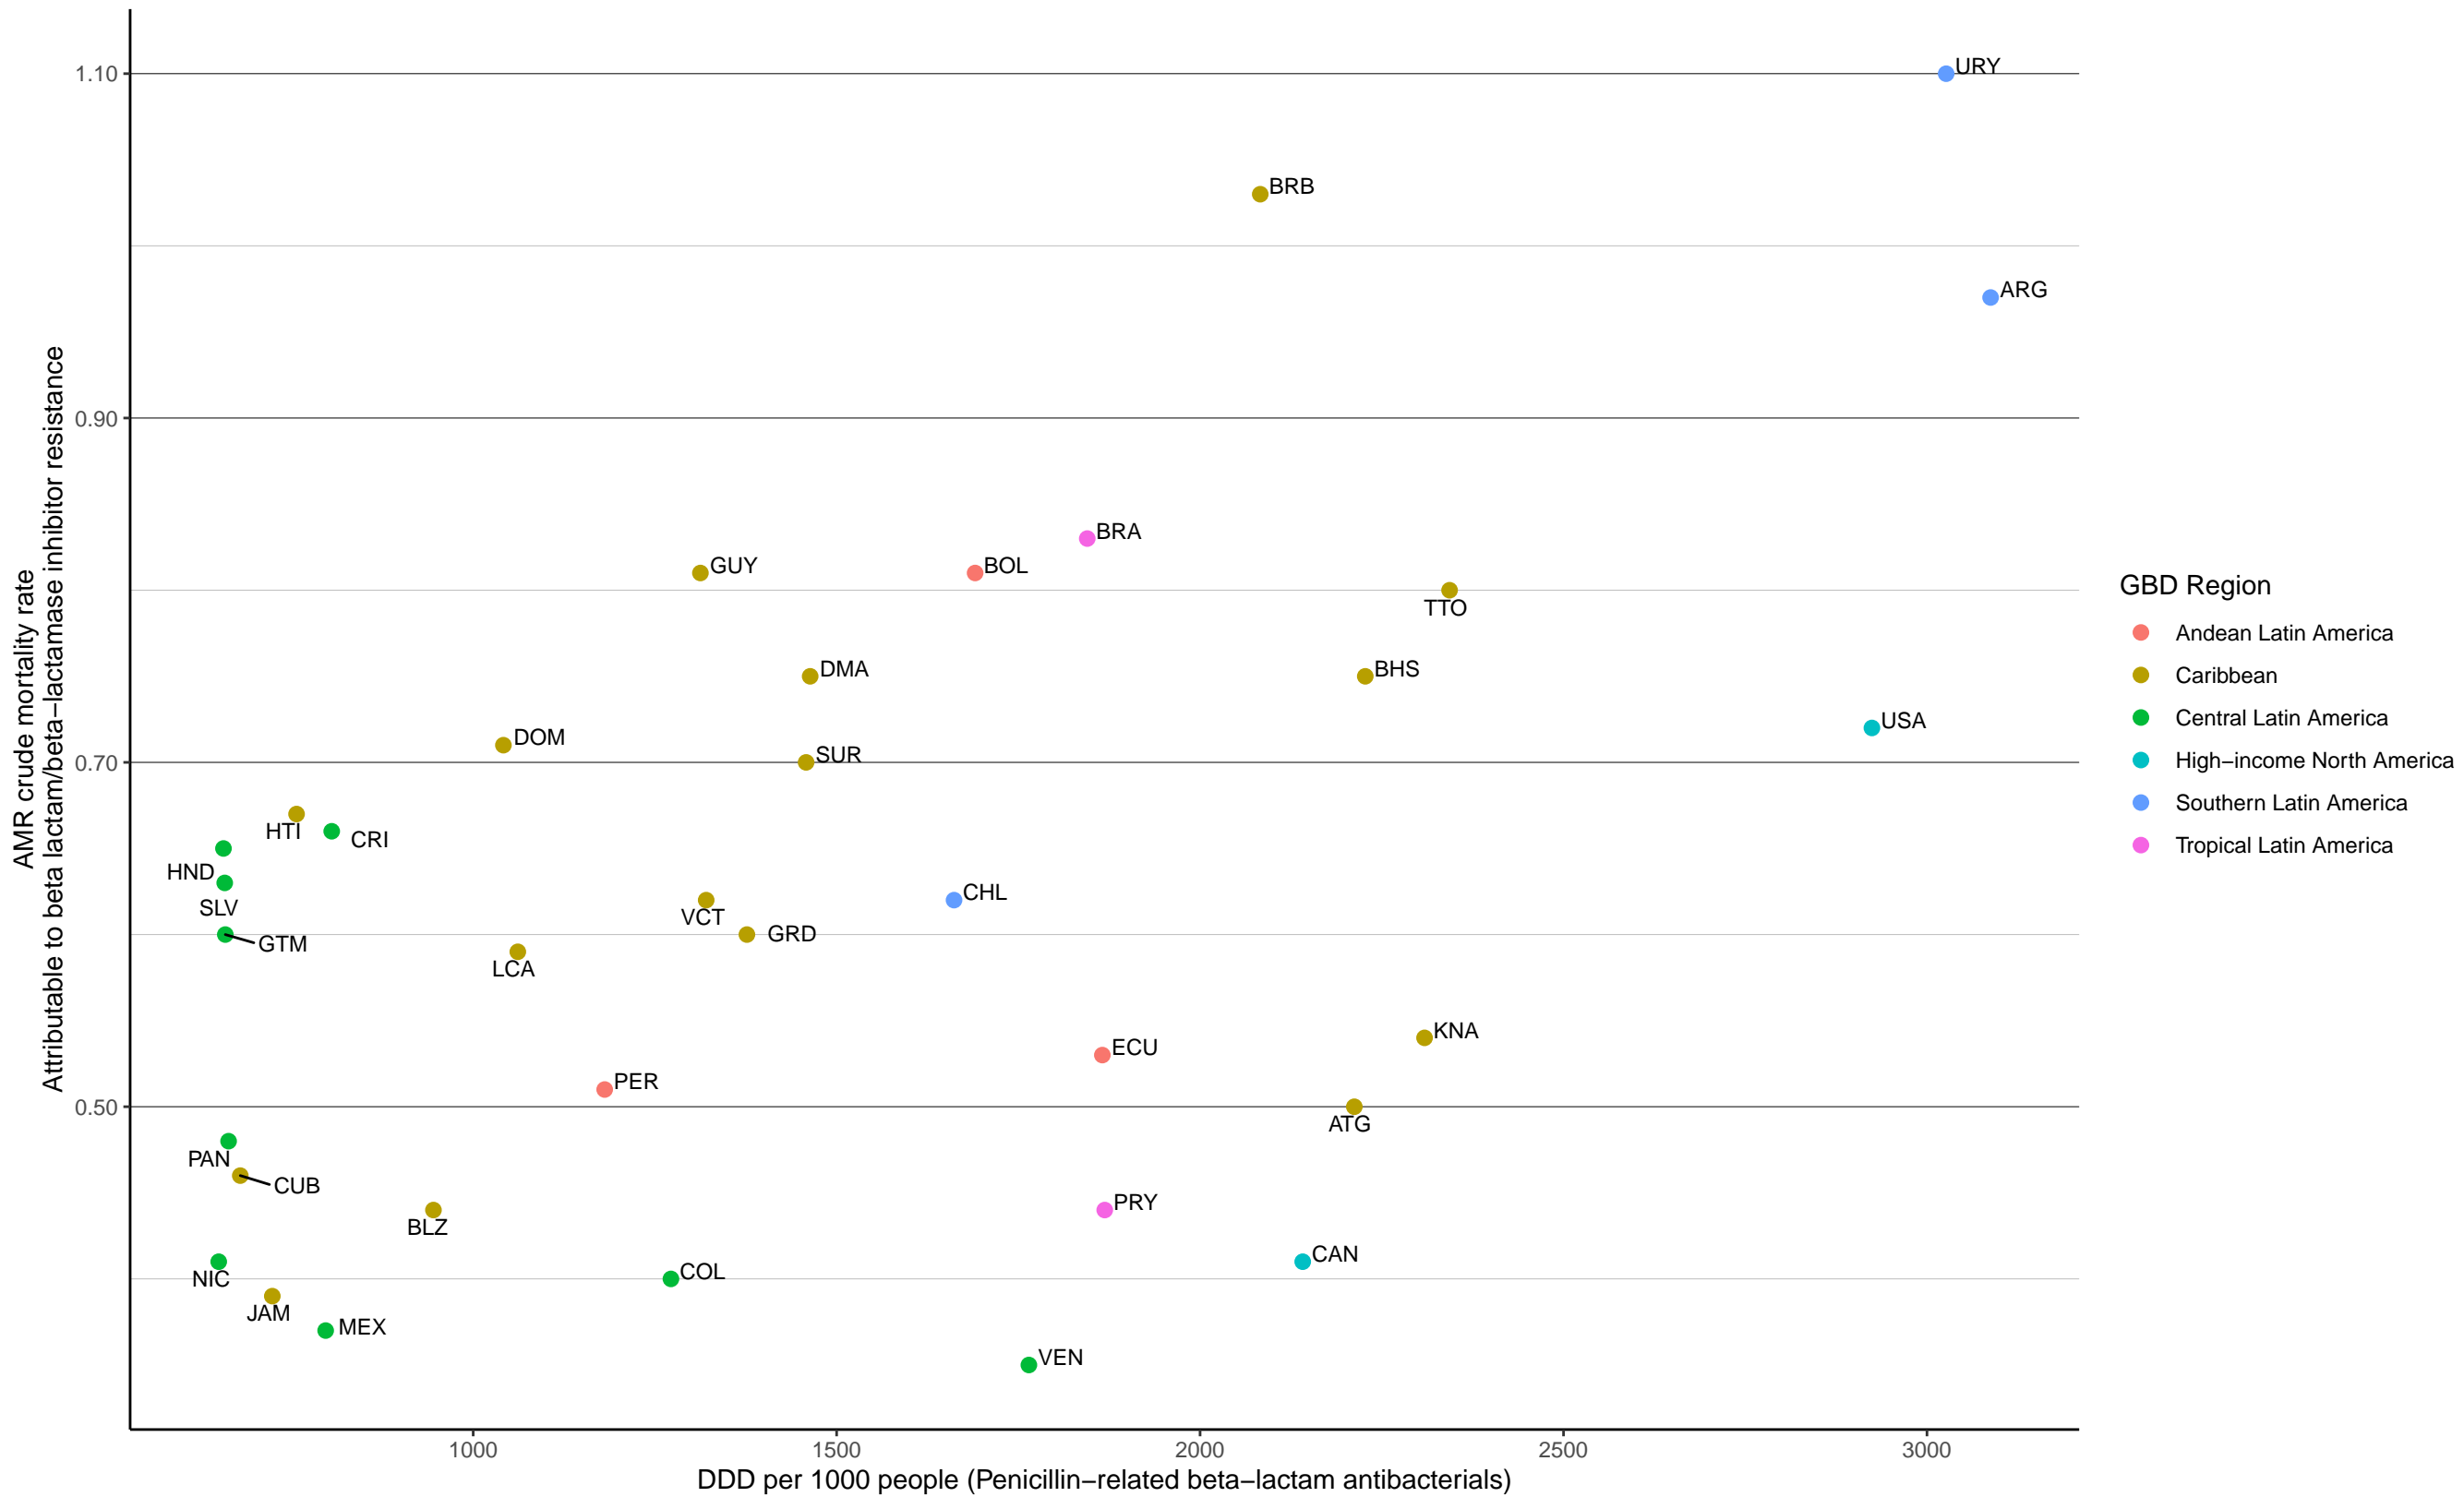

# Carbapenem AMR-associated mortality rate by J01D DDD per 1000 people, 2019

Correlation coefficient (95% confidence interval) = 0.24 (-0.1,0.53)

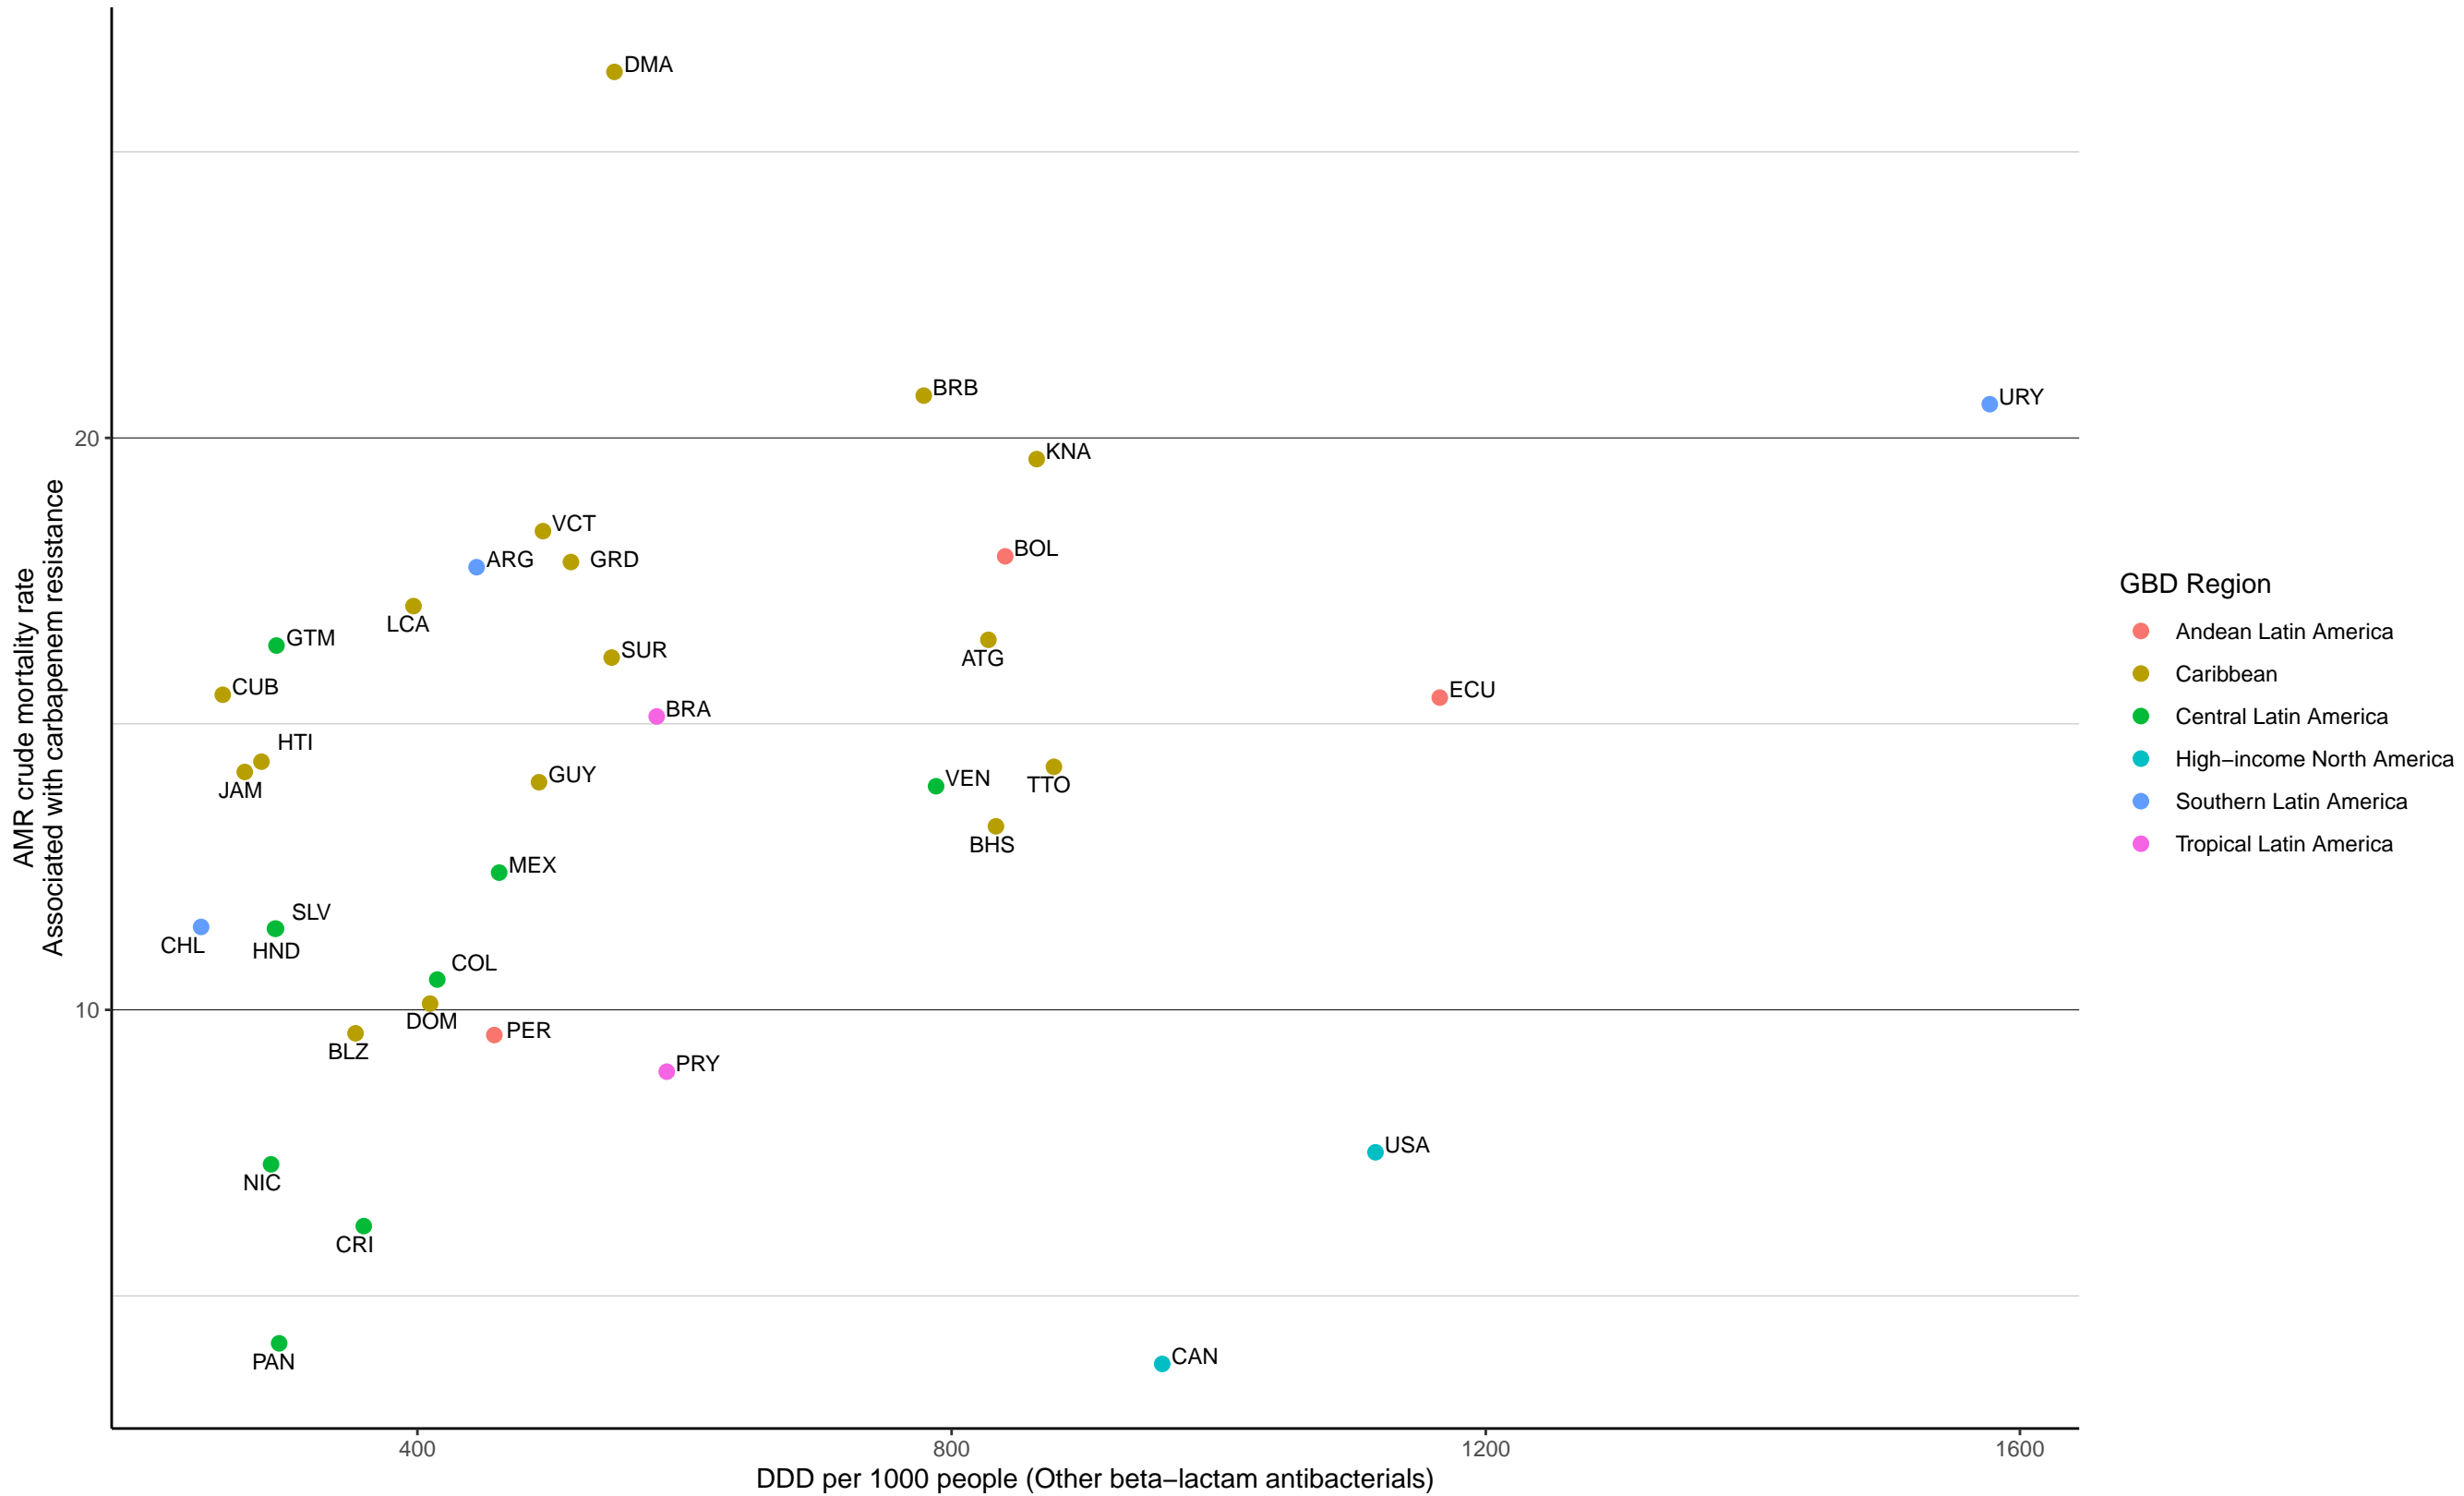

# Carbapenem AMR—attributable mortality rate by J01D DDD per 1000 people, 2019

Correlation coefficient (95% confidence interval) = 0.31 (−0.03,0.58)

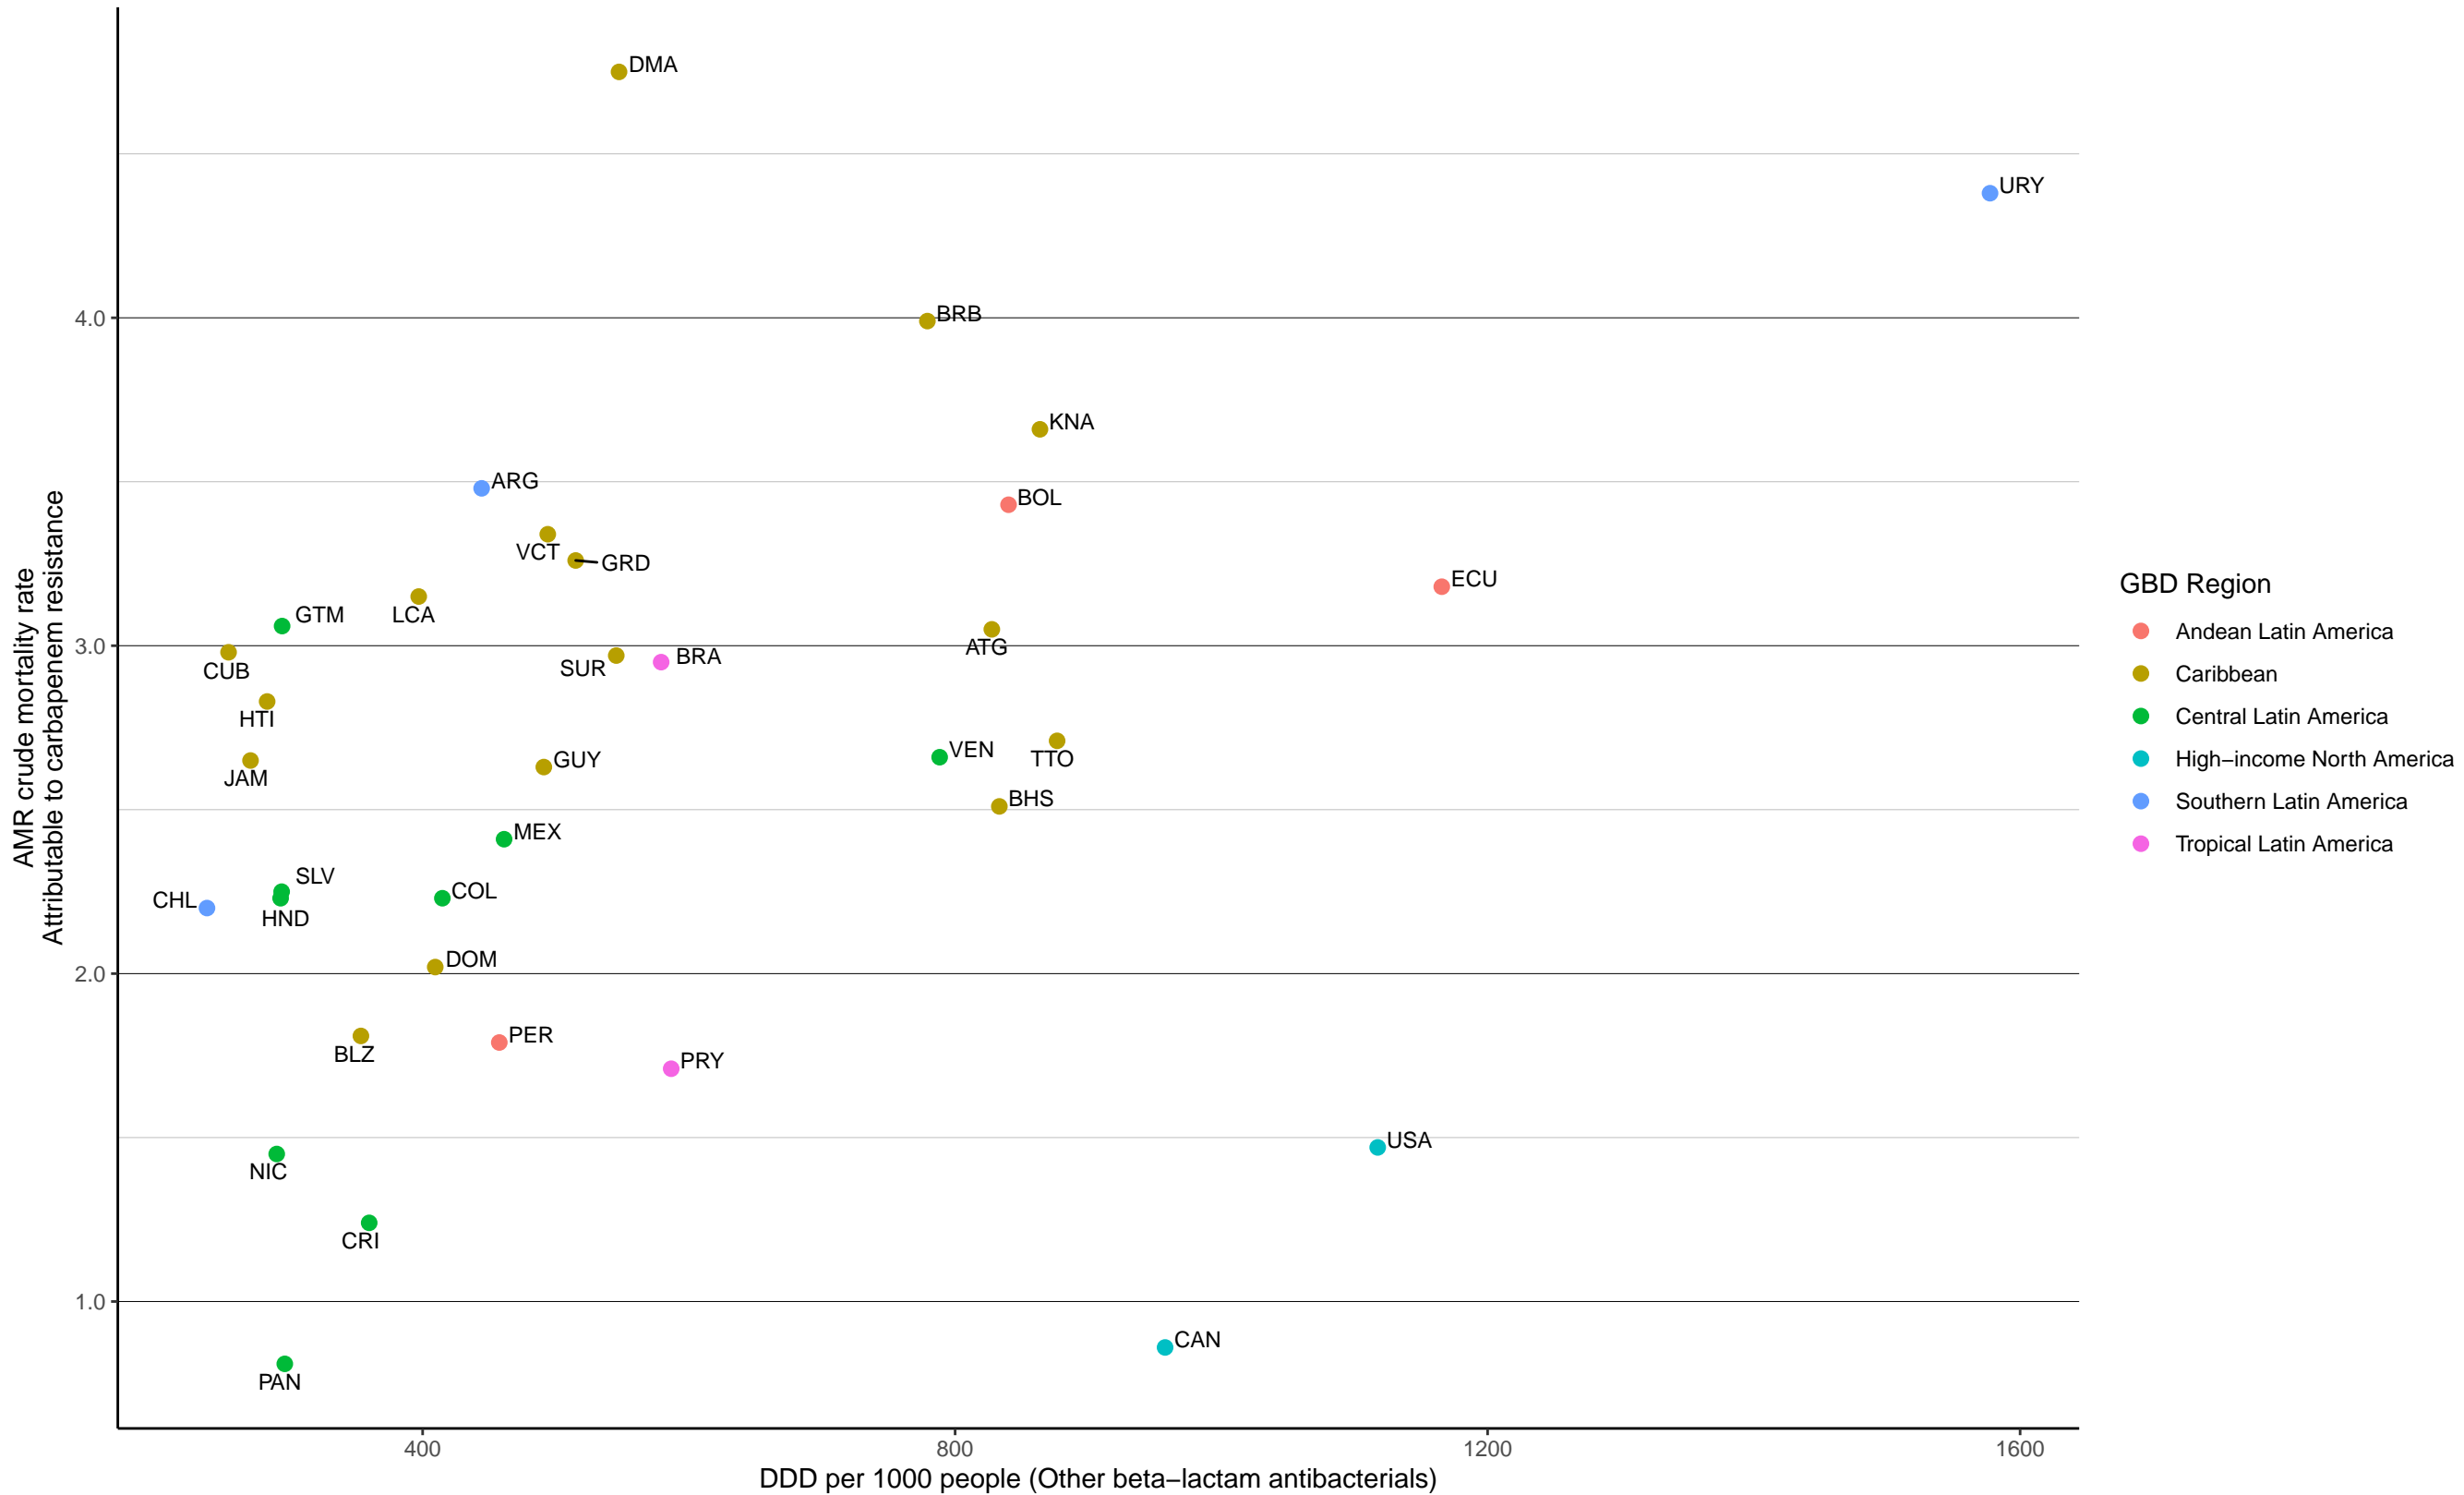

# Fluoroquinolone AMR-associated mortality rate by J01M DDD per 1000 people, 2019

Correlation coefficient (95% confidence interval) = 0.39 (0.06,0.64)

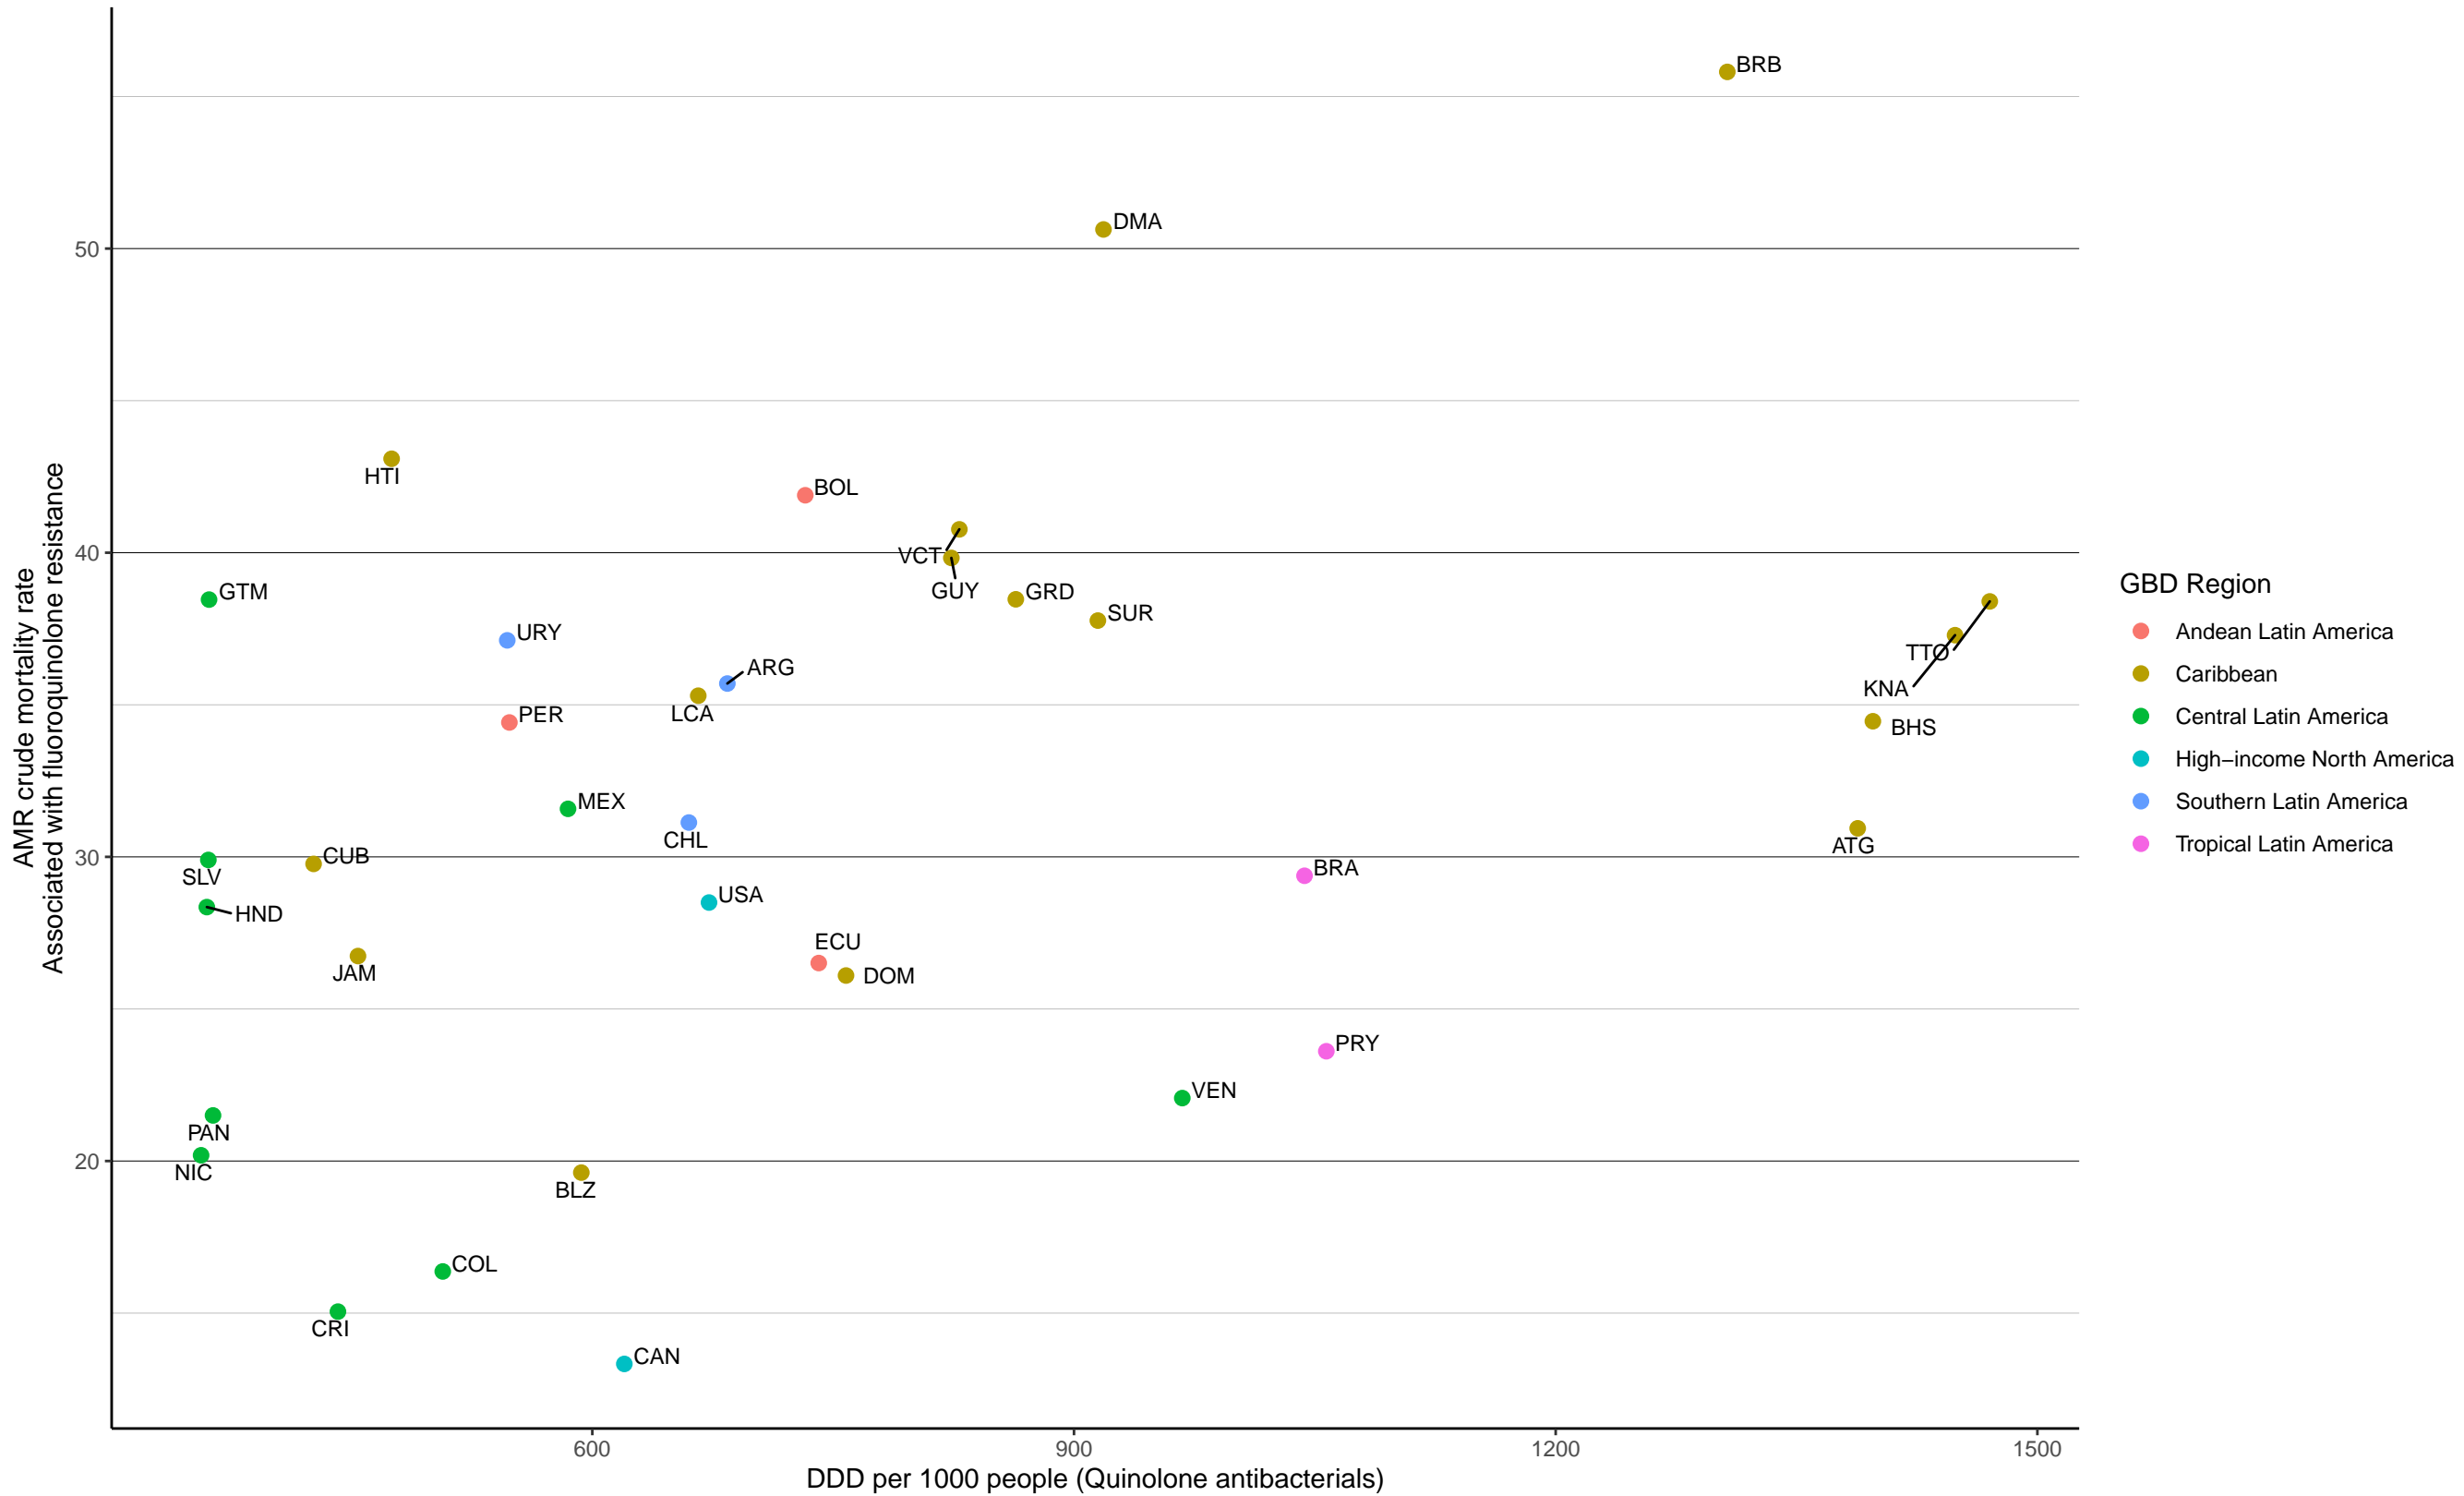

# Fluoroquinolone AMR-attributable mortality rate by J01M DDD per 1000 people, 2019

Correlation coefficient (95% confidence interval) = 0.4 (0.08,0.65)

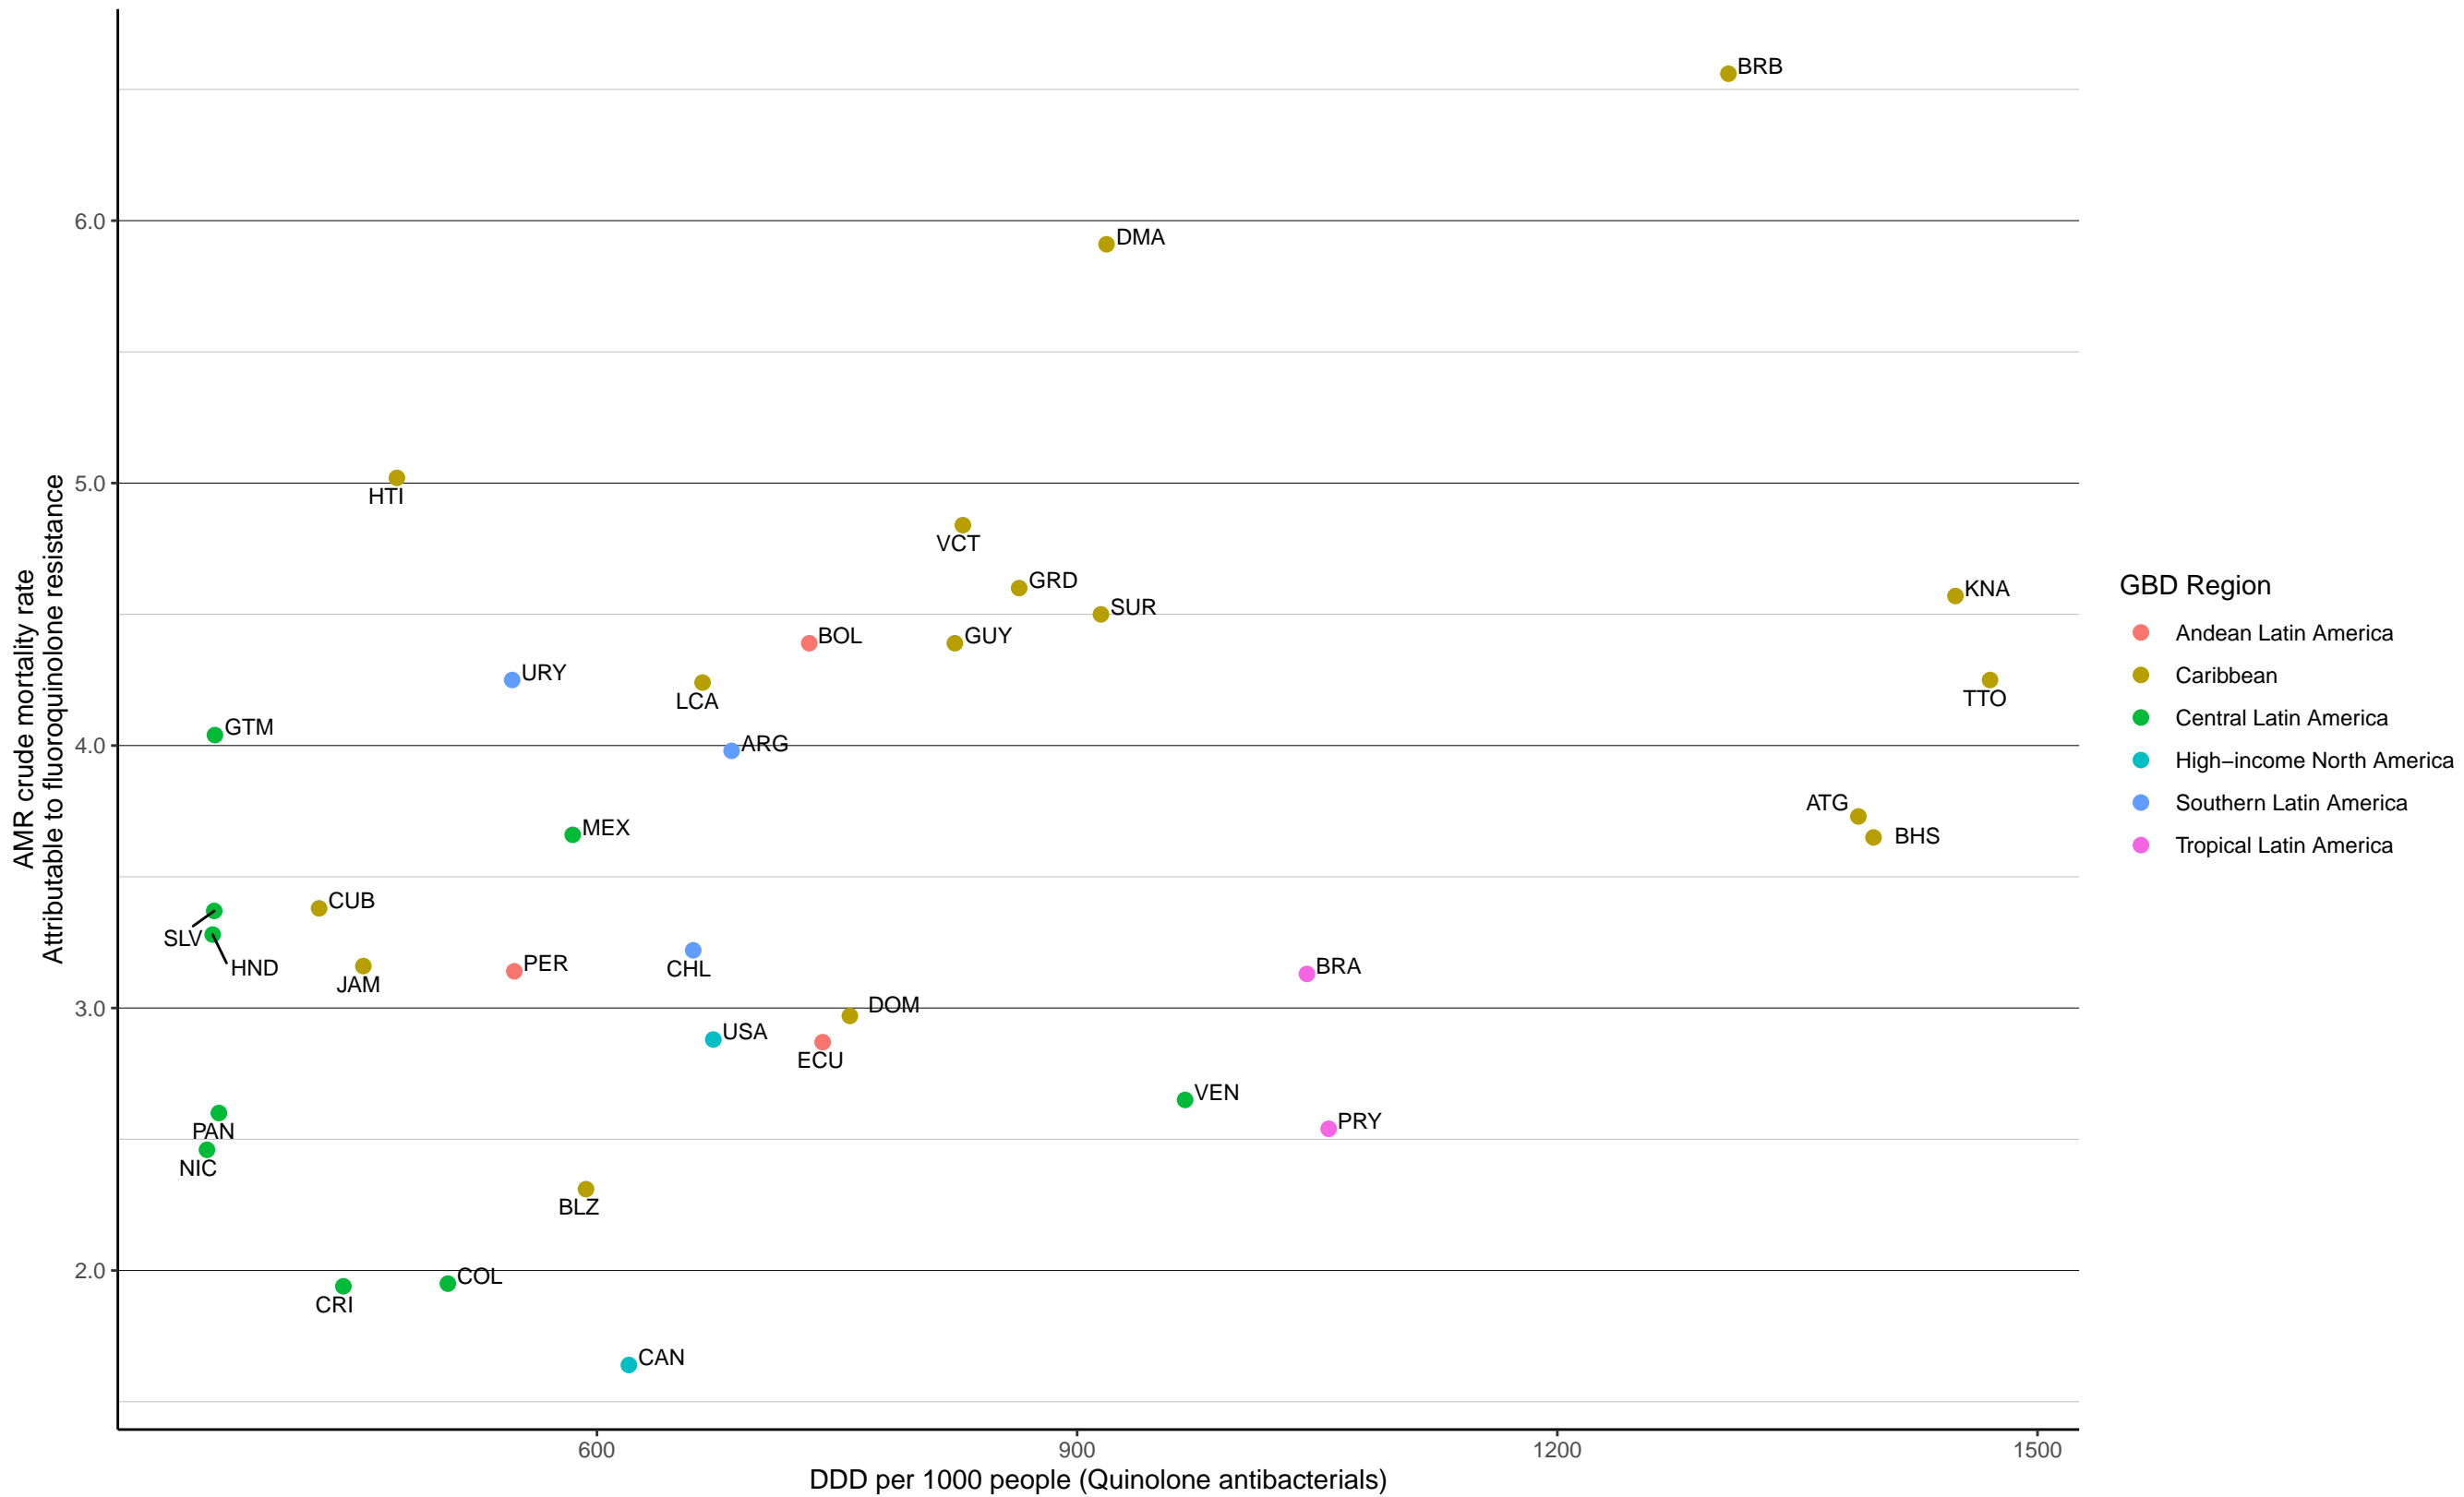

# Fourth-generation cephalosporin AMR-associated mortality rate by J01D DDD per 1000 people, 2019

Correlation coefficient (95% confidence interval) =  $-0.01$  ( $-0.34, 0.33$ )

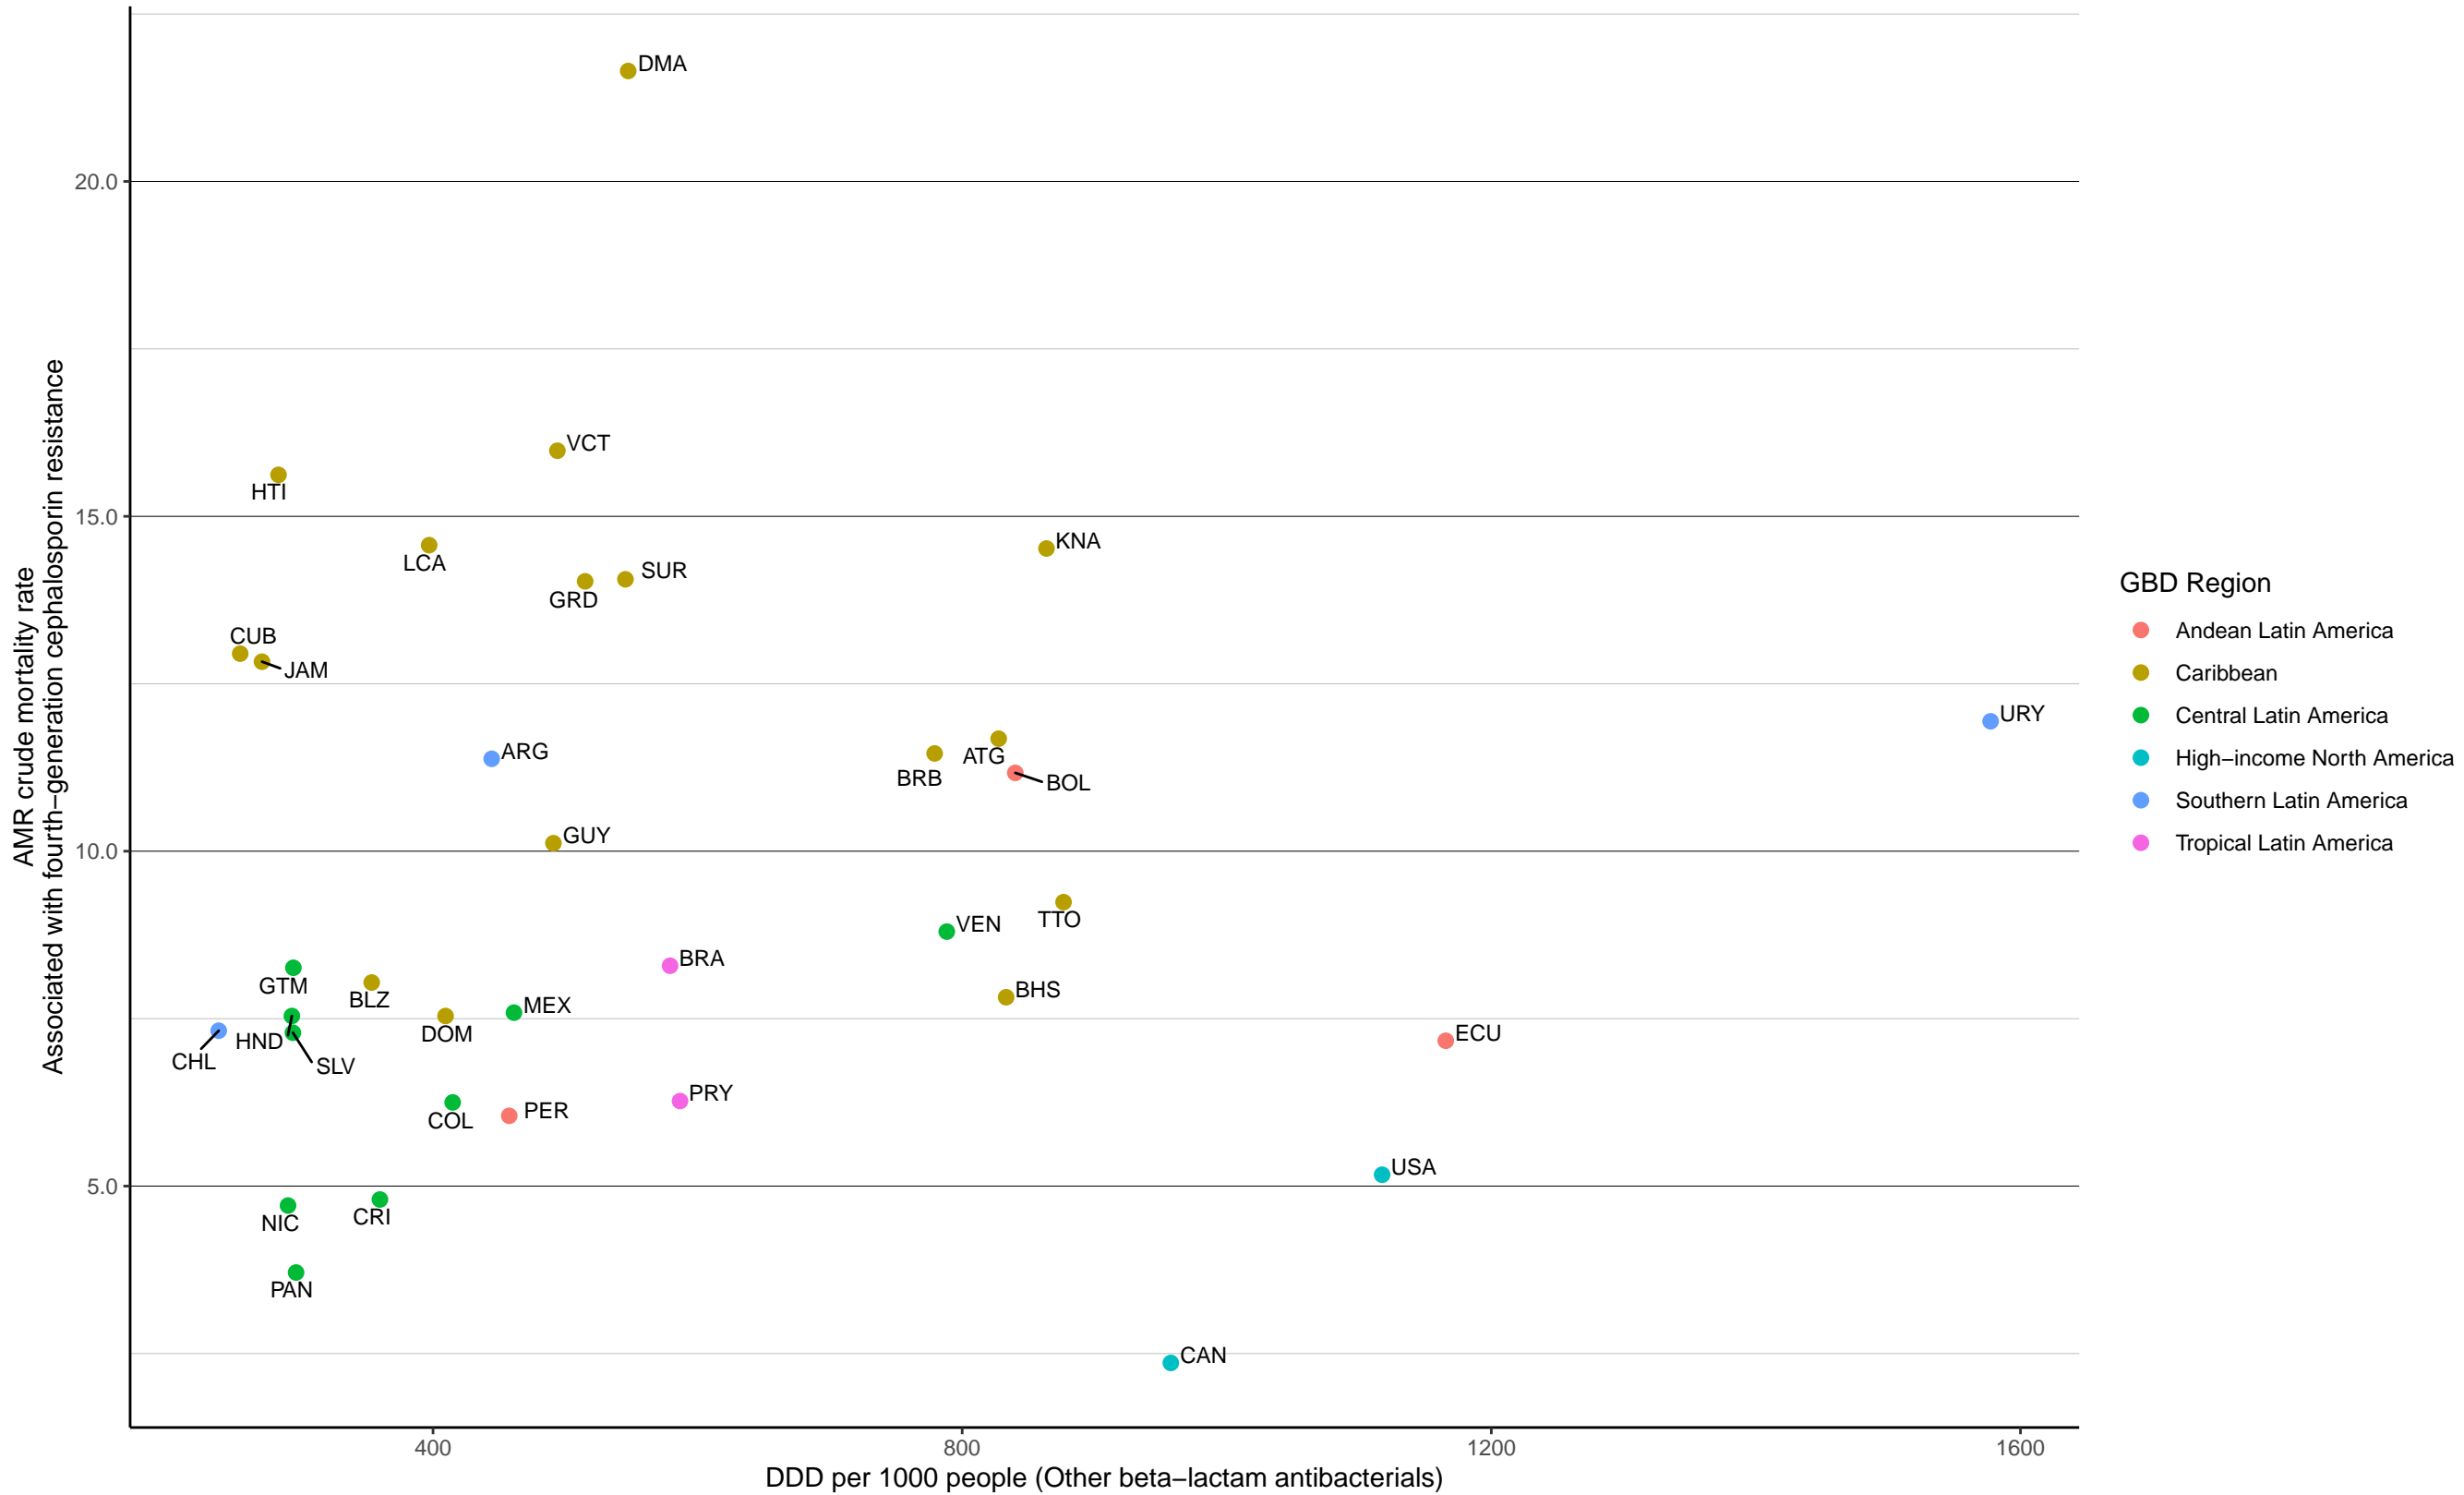

# Fourth-generation cephalosporin AMR-attributable mortality rate by J01D DDD per 1000 people, 2019

Correlation coefficient (95% confidence interval) =  $-0.09$  ( $-0.41, 0.25$ )

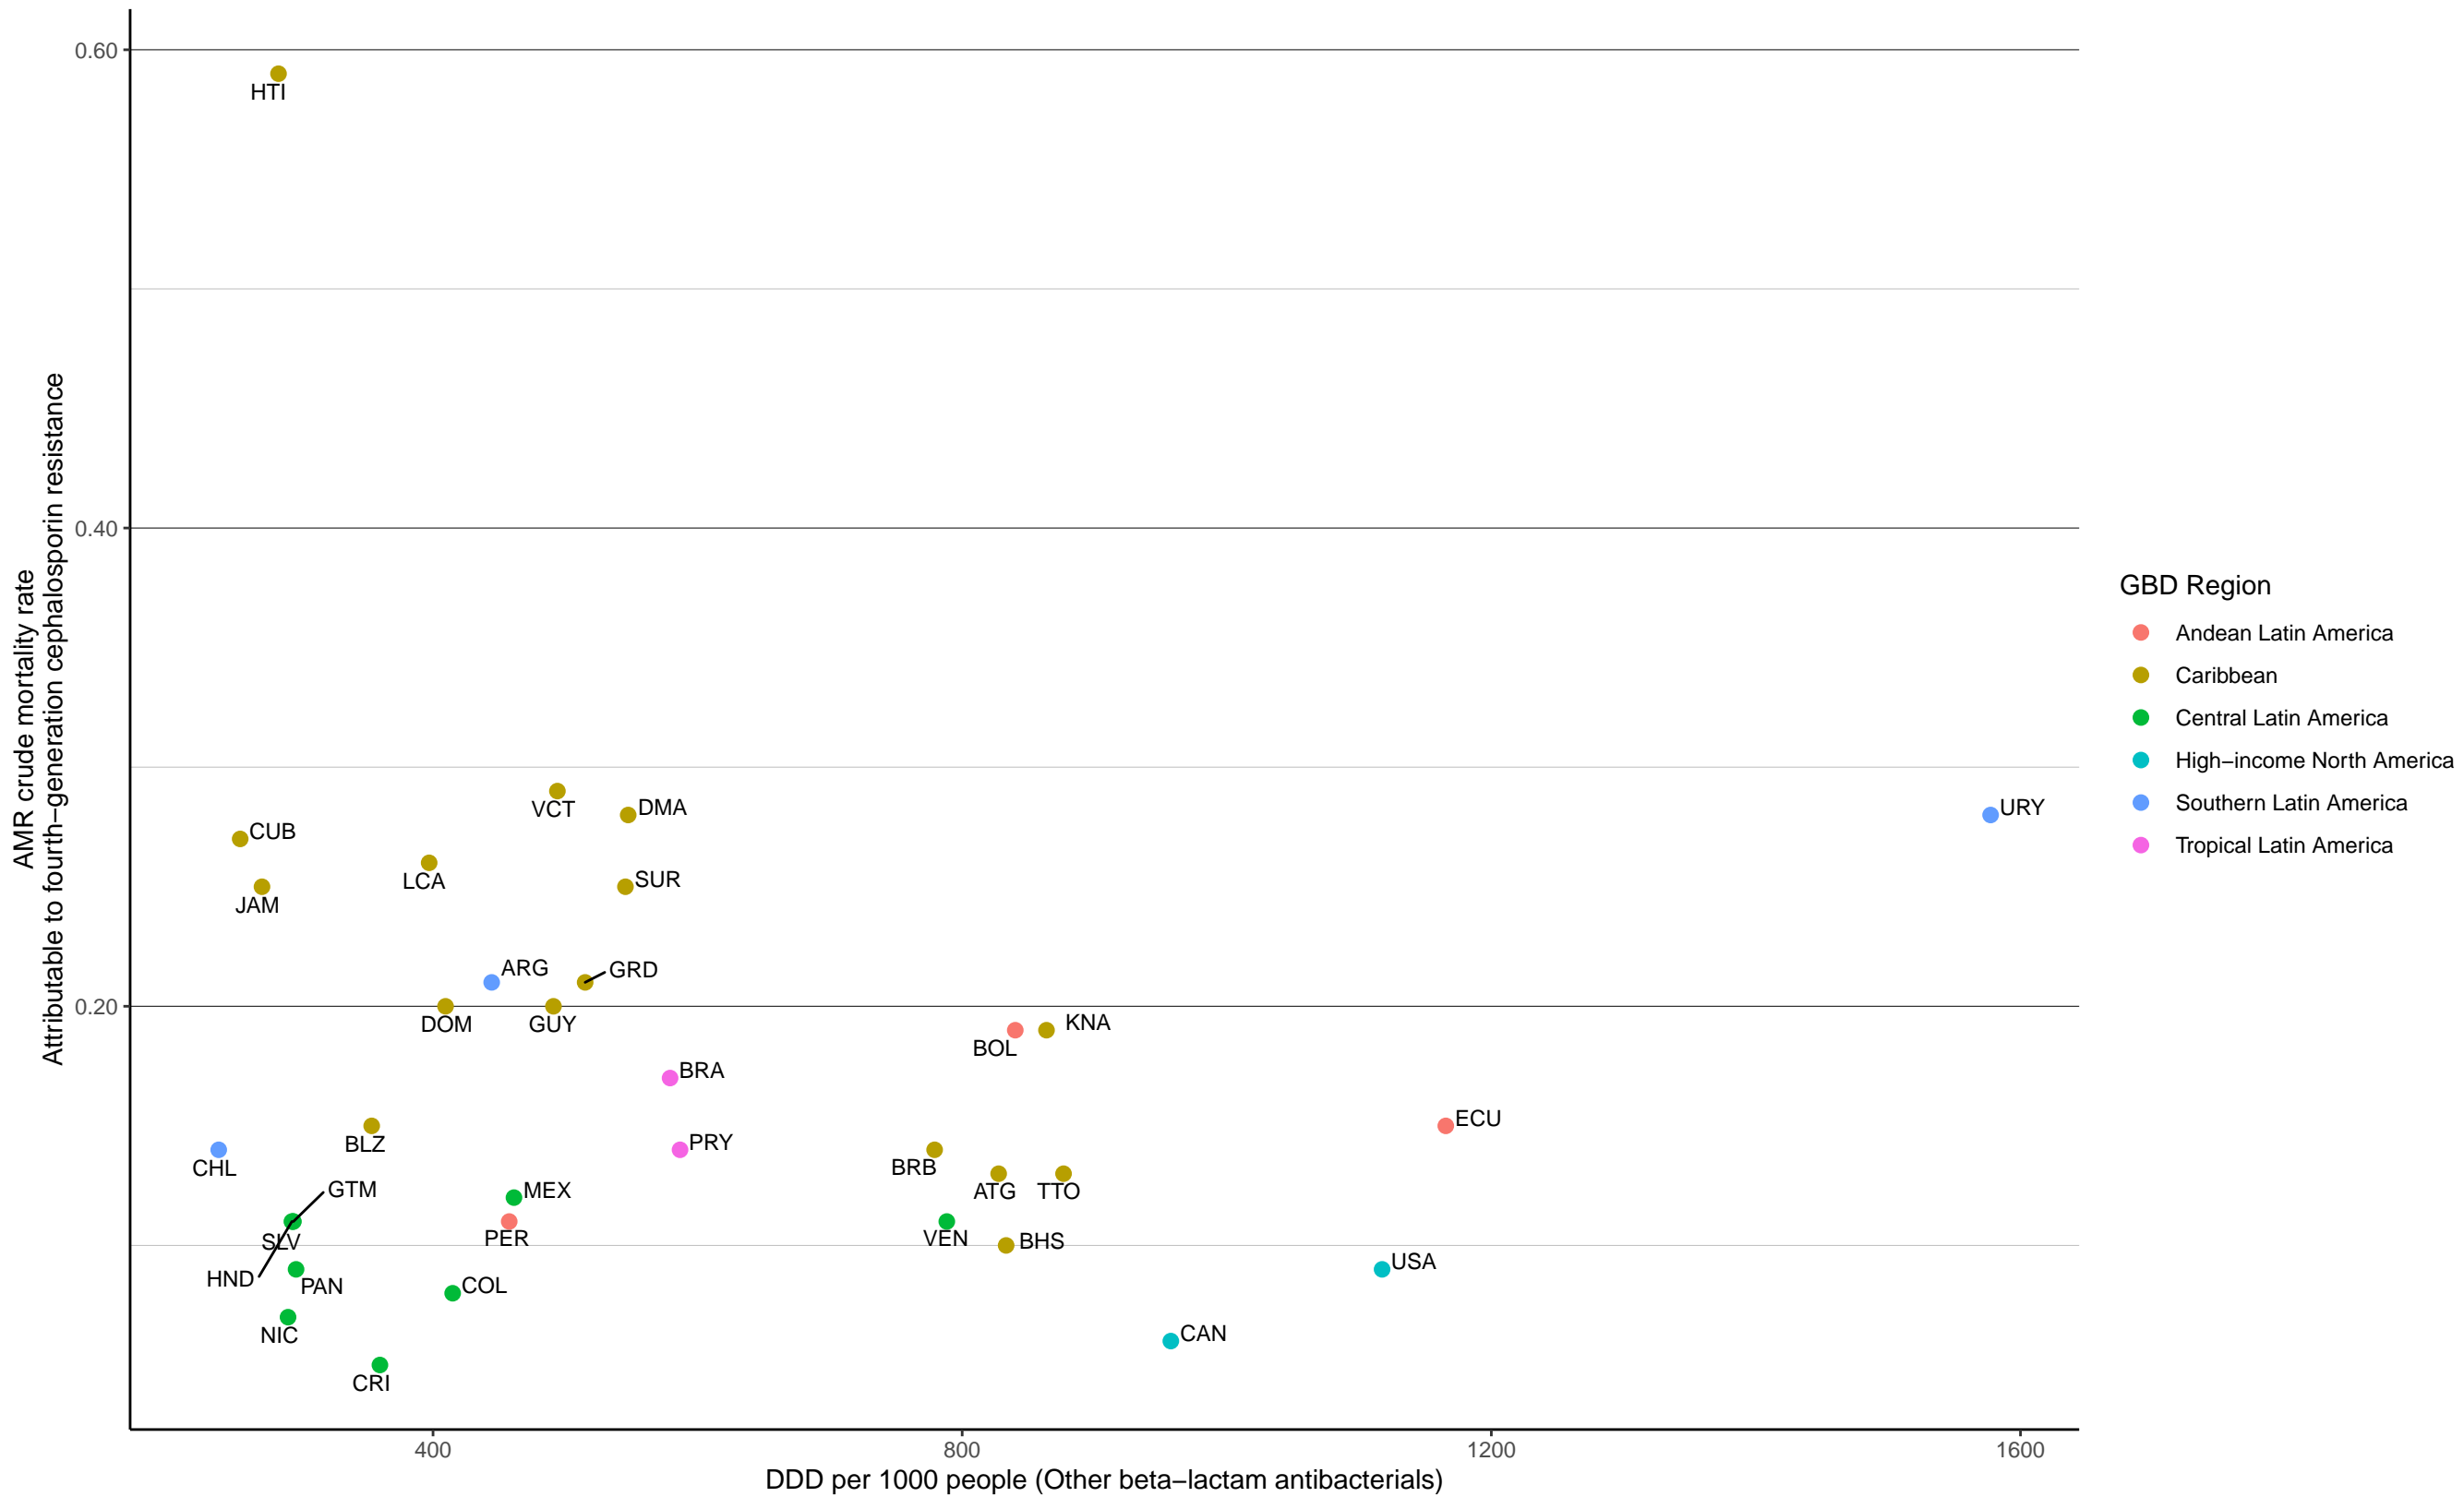



# Macrolide AMR-associated mortality rate by J01F DDD per 1000 people, 2019

Correlation coefficient (95% confidence interval) = 0.46 (0.15,0.69)

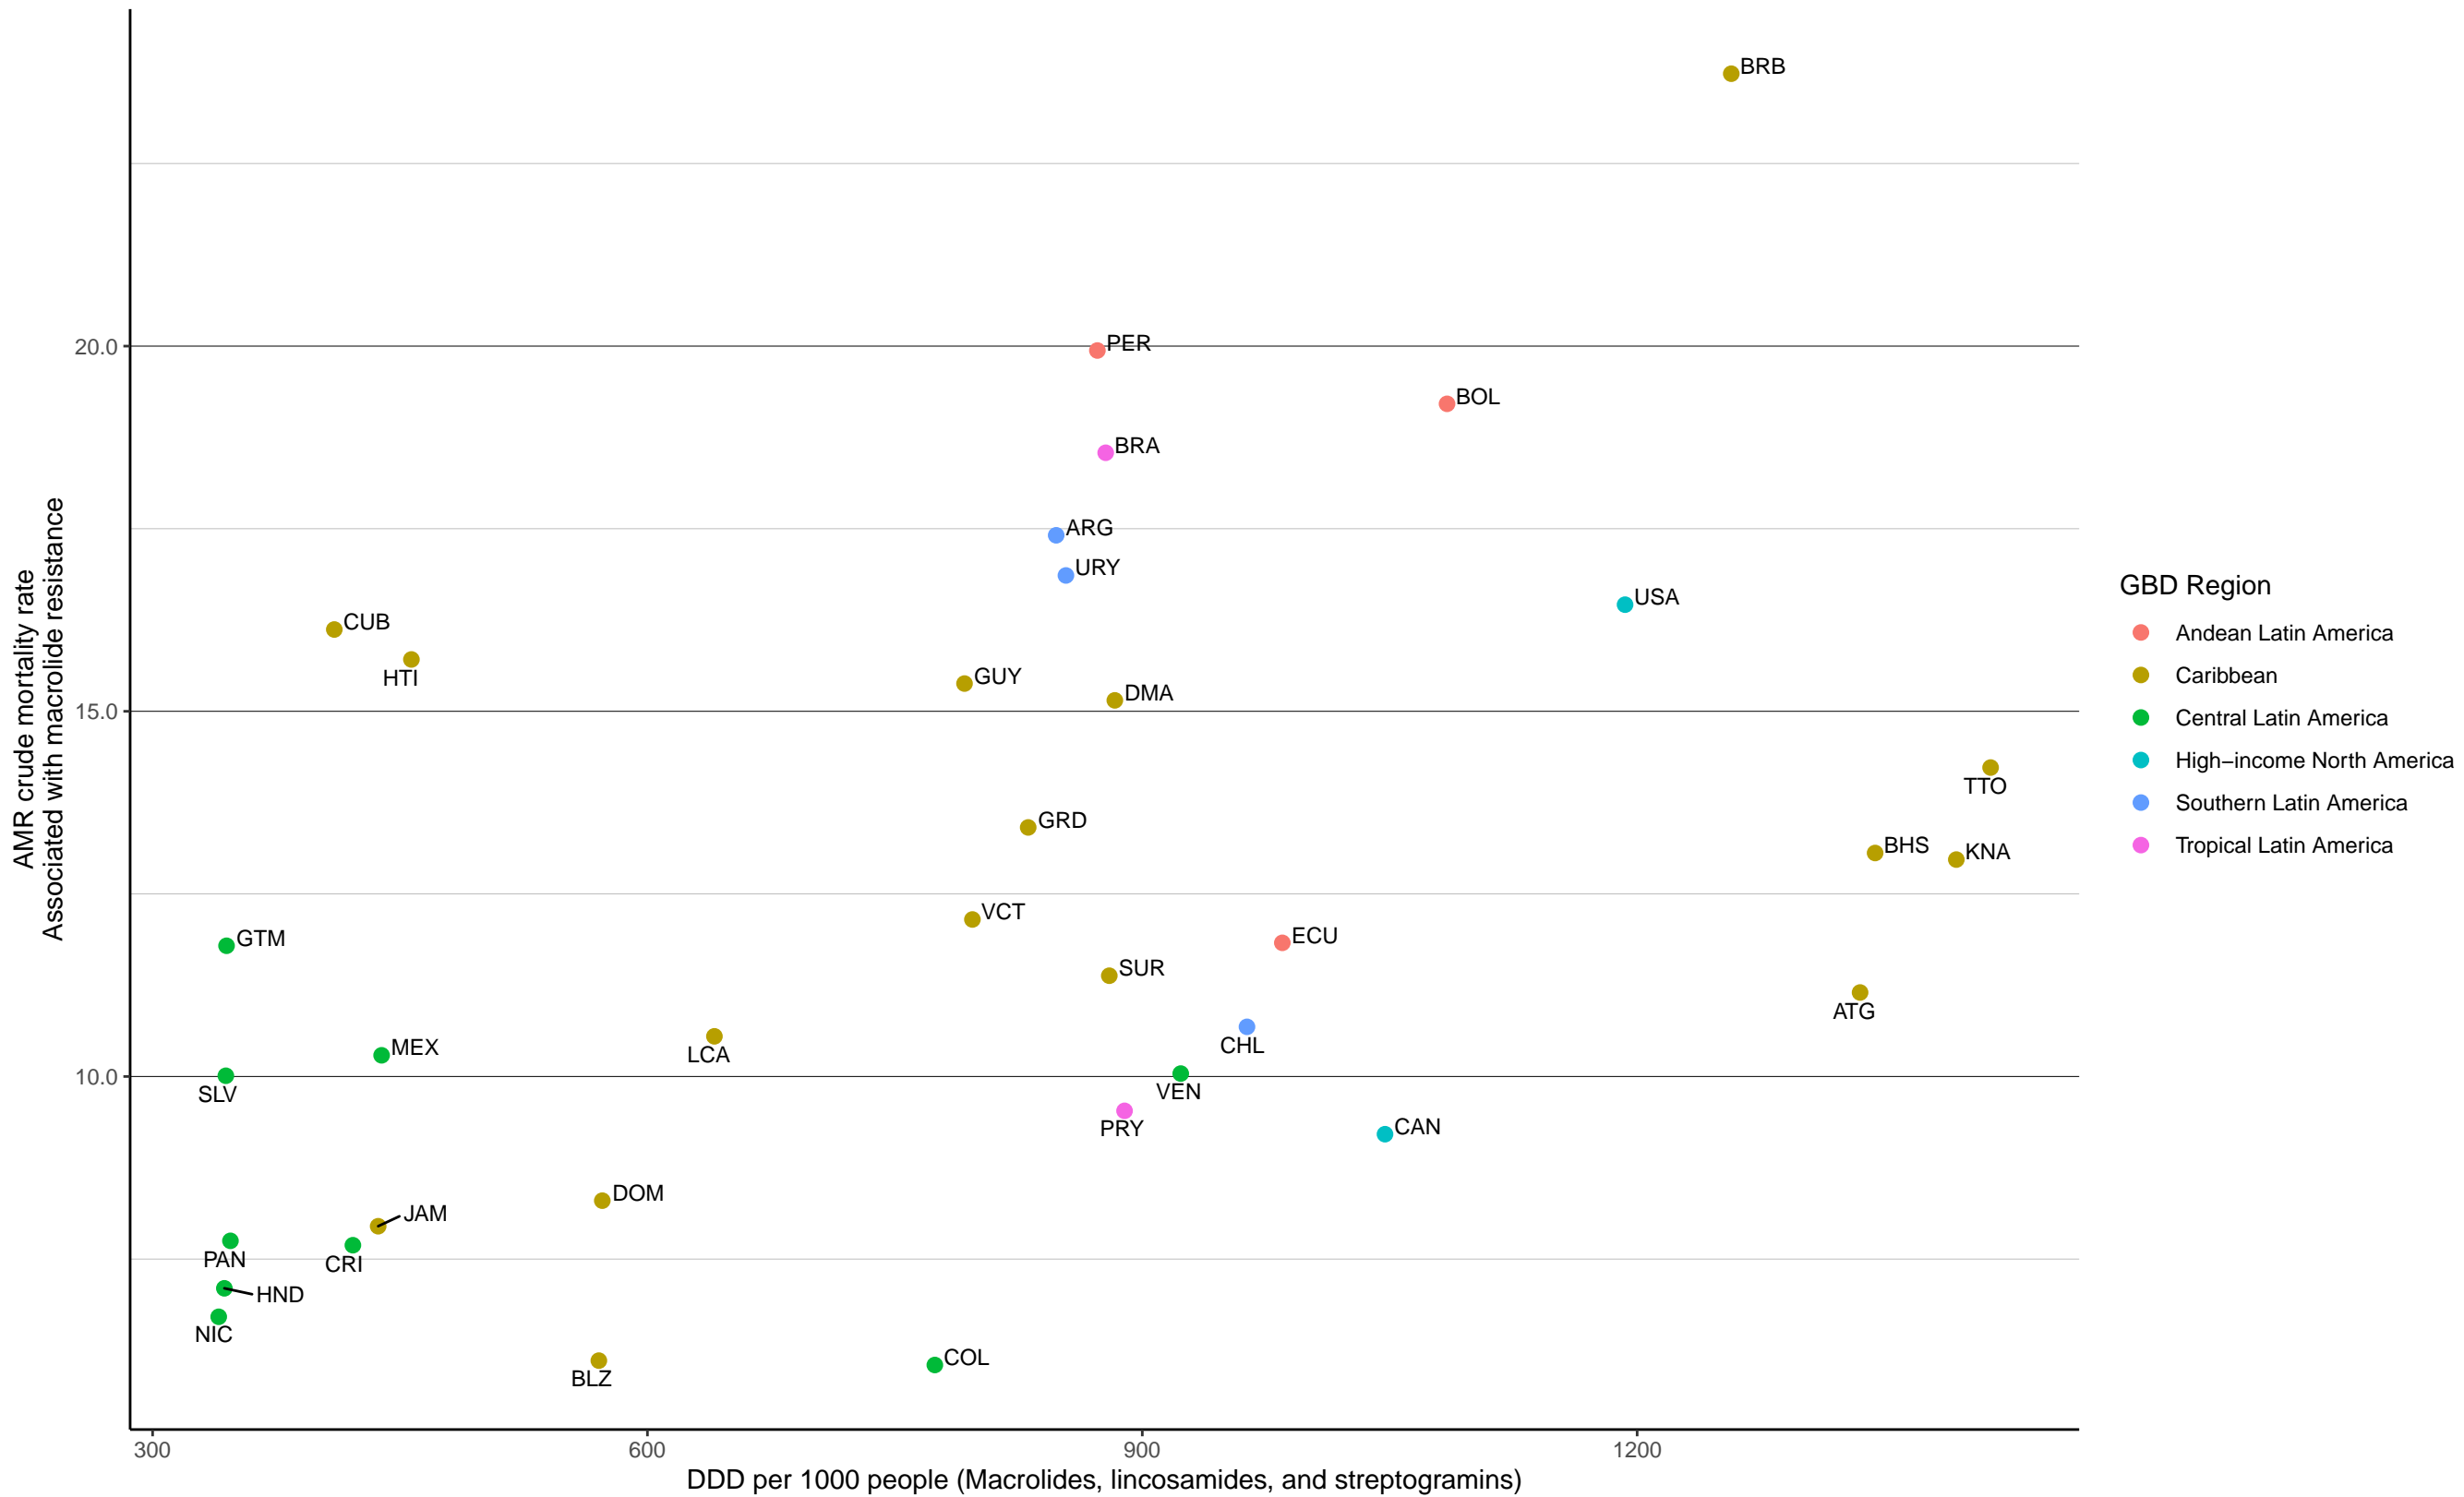

# Macrolide AMR—attributable mortality rate by J01F DDD per 1000 people, 2019

Correlation coefficient (95% confidence interval) = 0.46 (0.15,0.69)

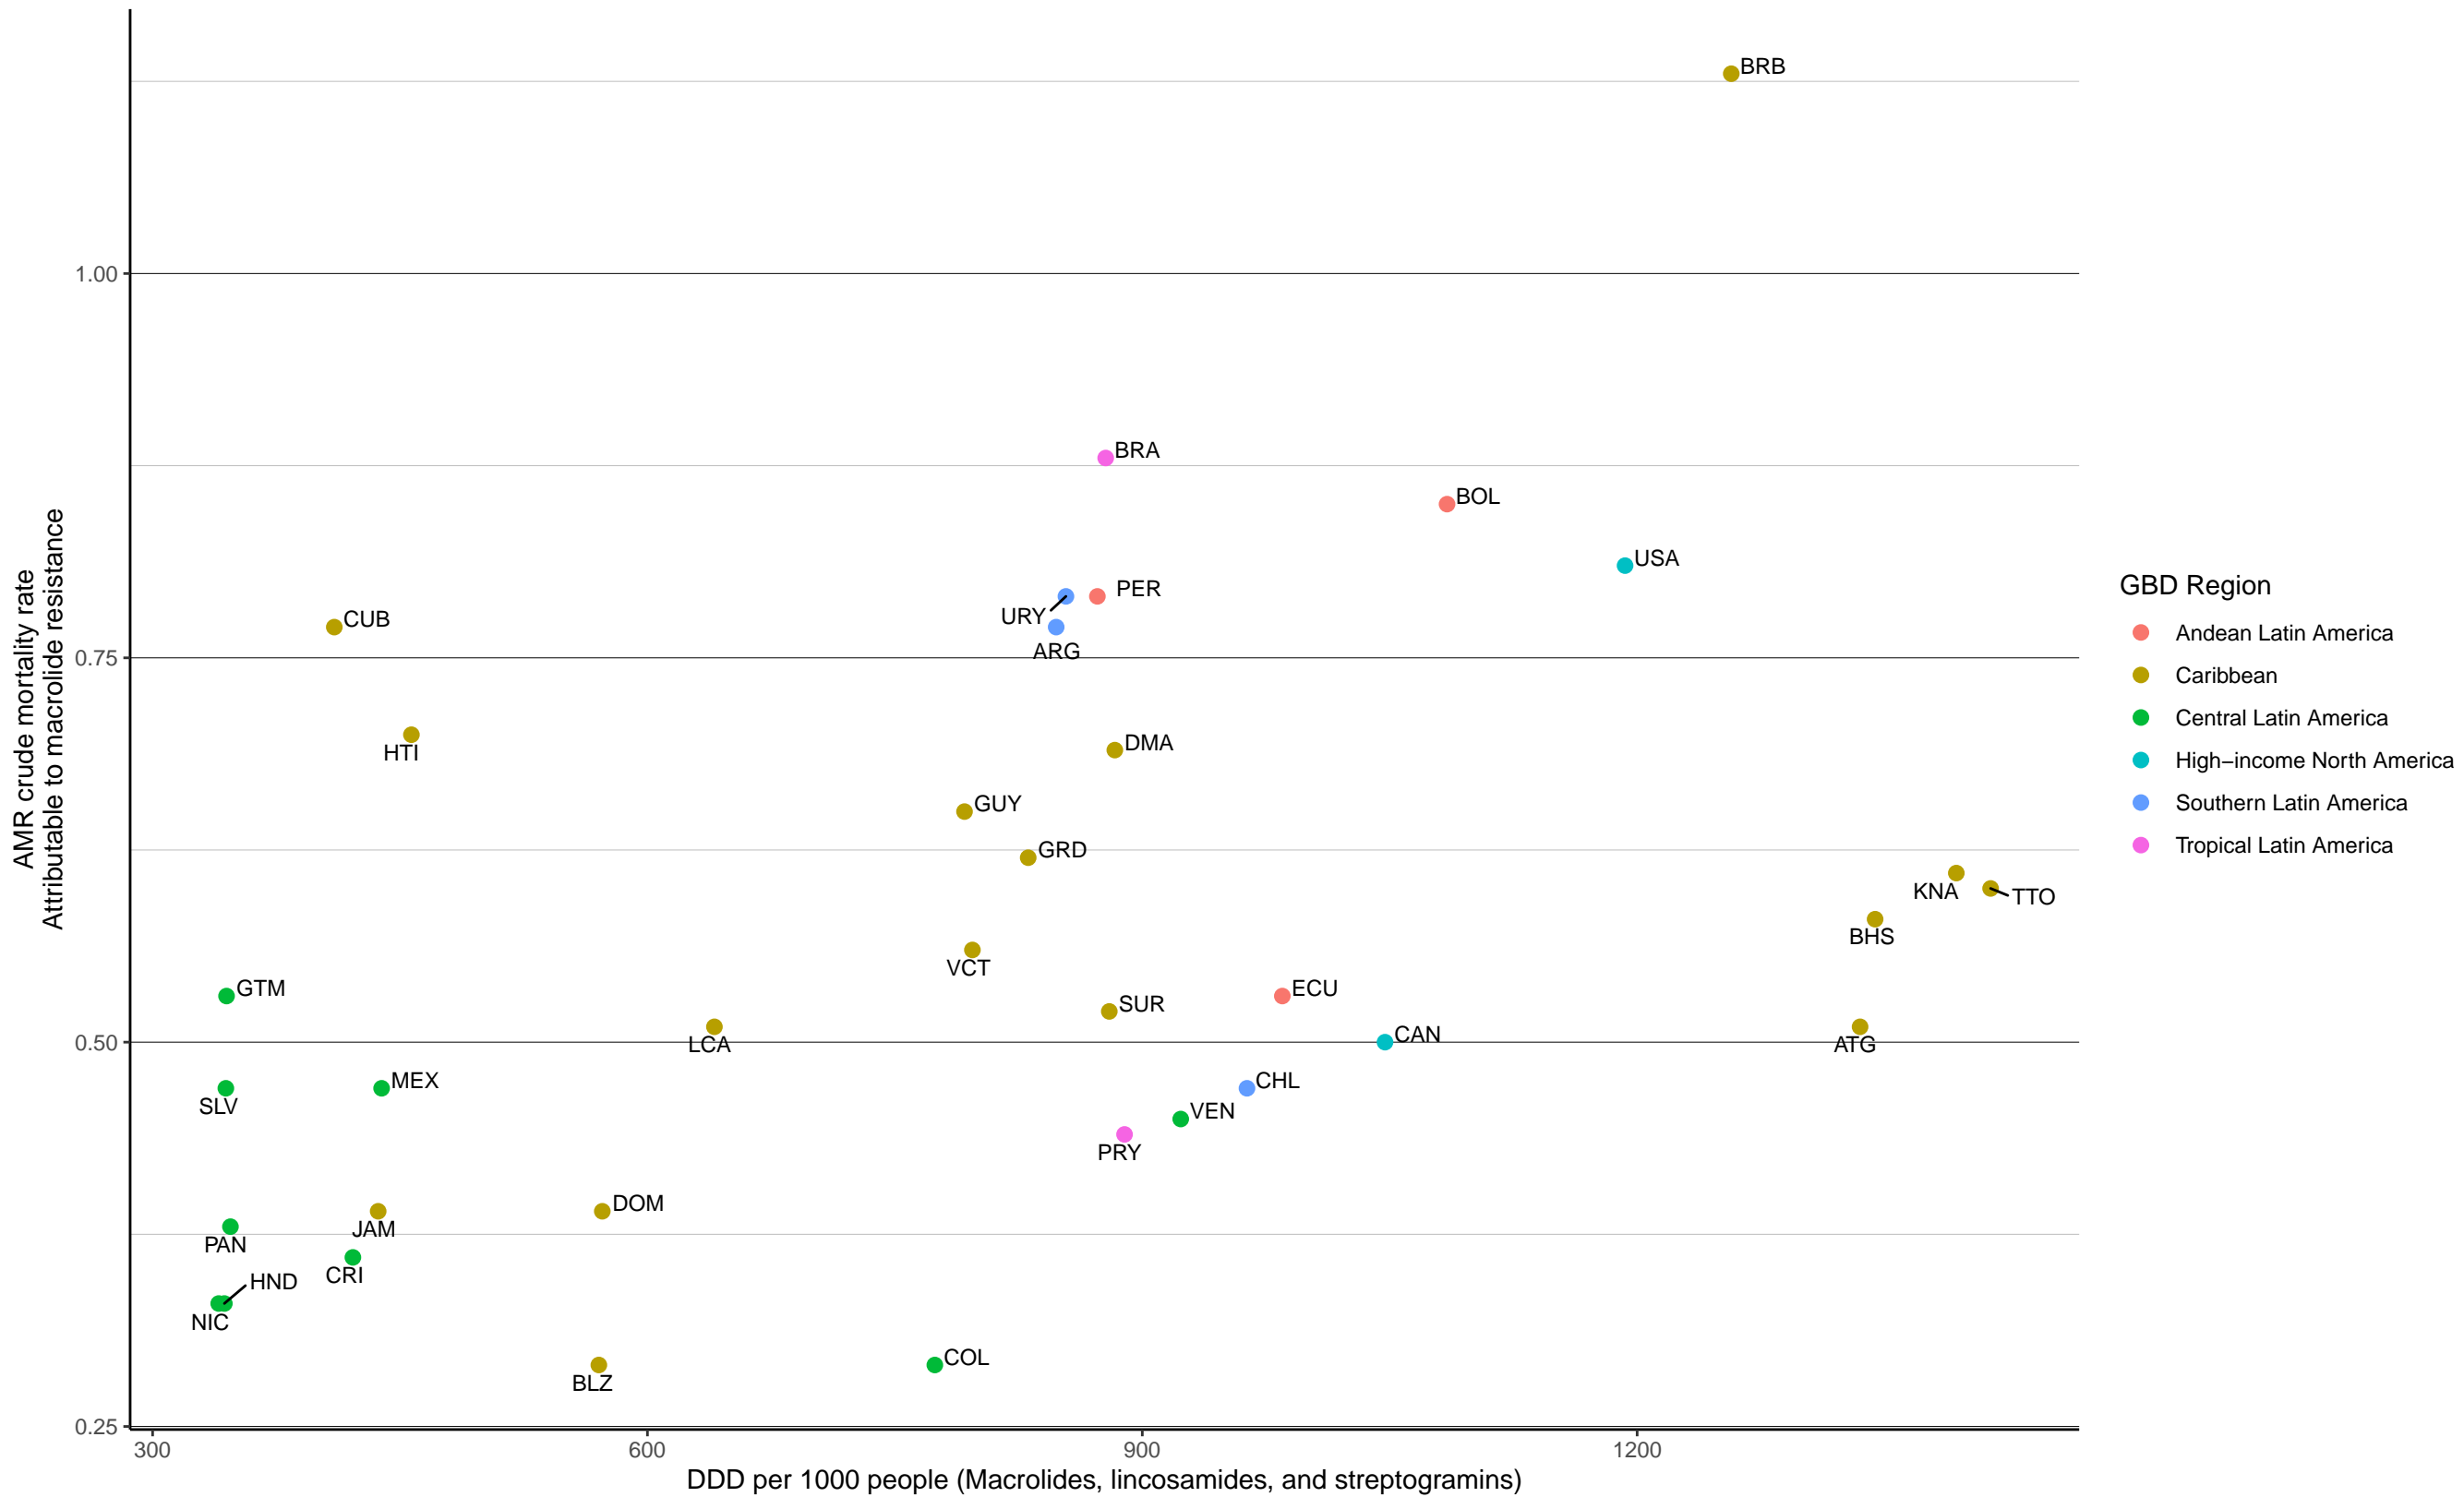

# Methicillin AMR-associated mortality rate by J01C DDD per 1000 people, 2019

Correlation coefficient (95% confidence interval) = 0.37 (0.05,0.63)

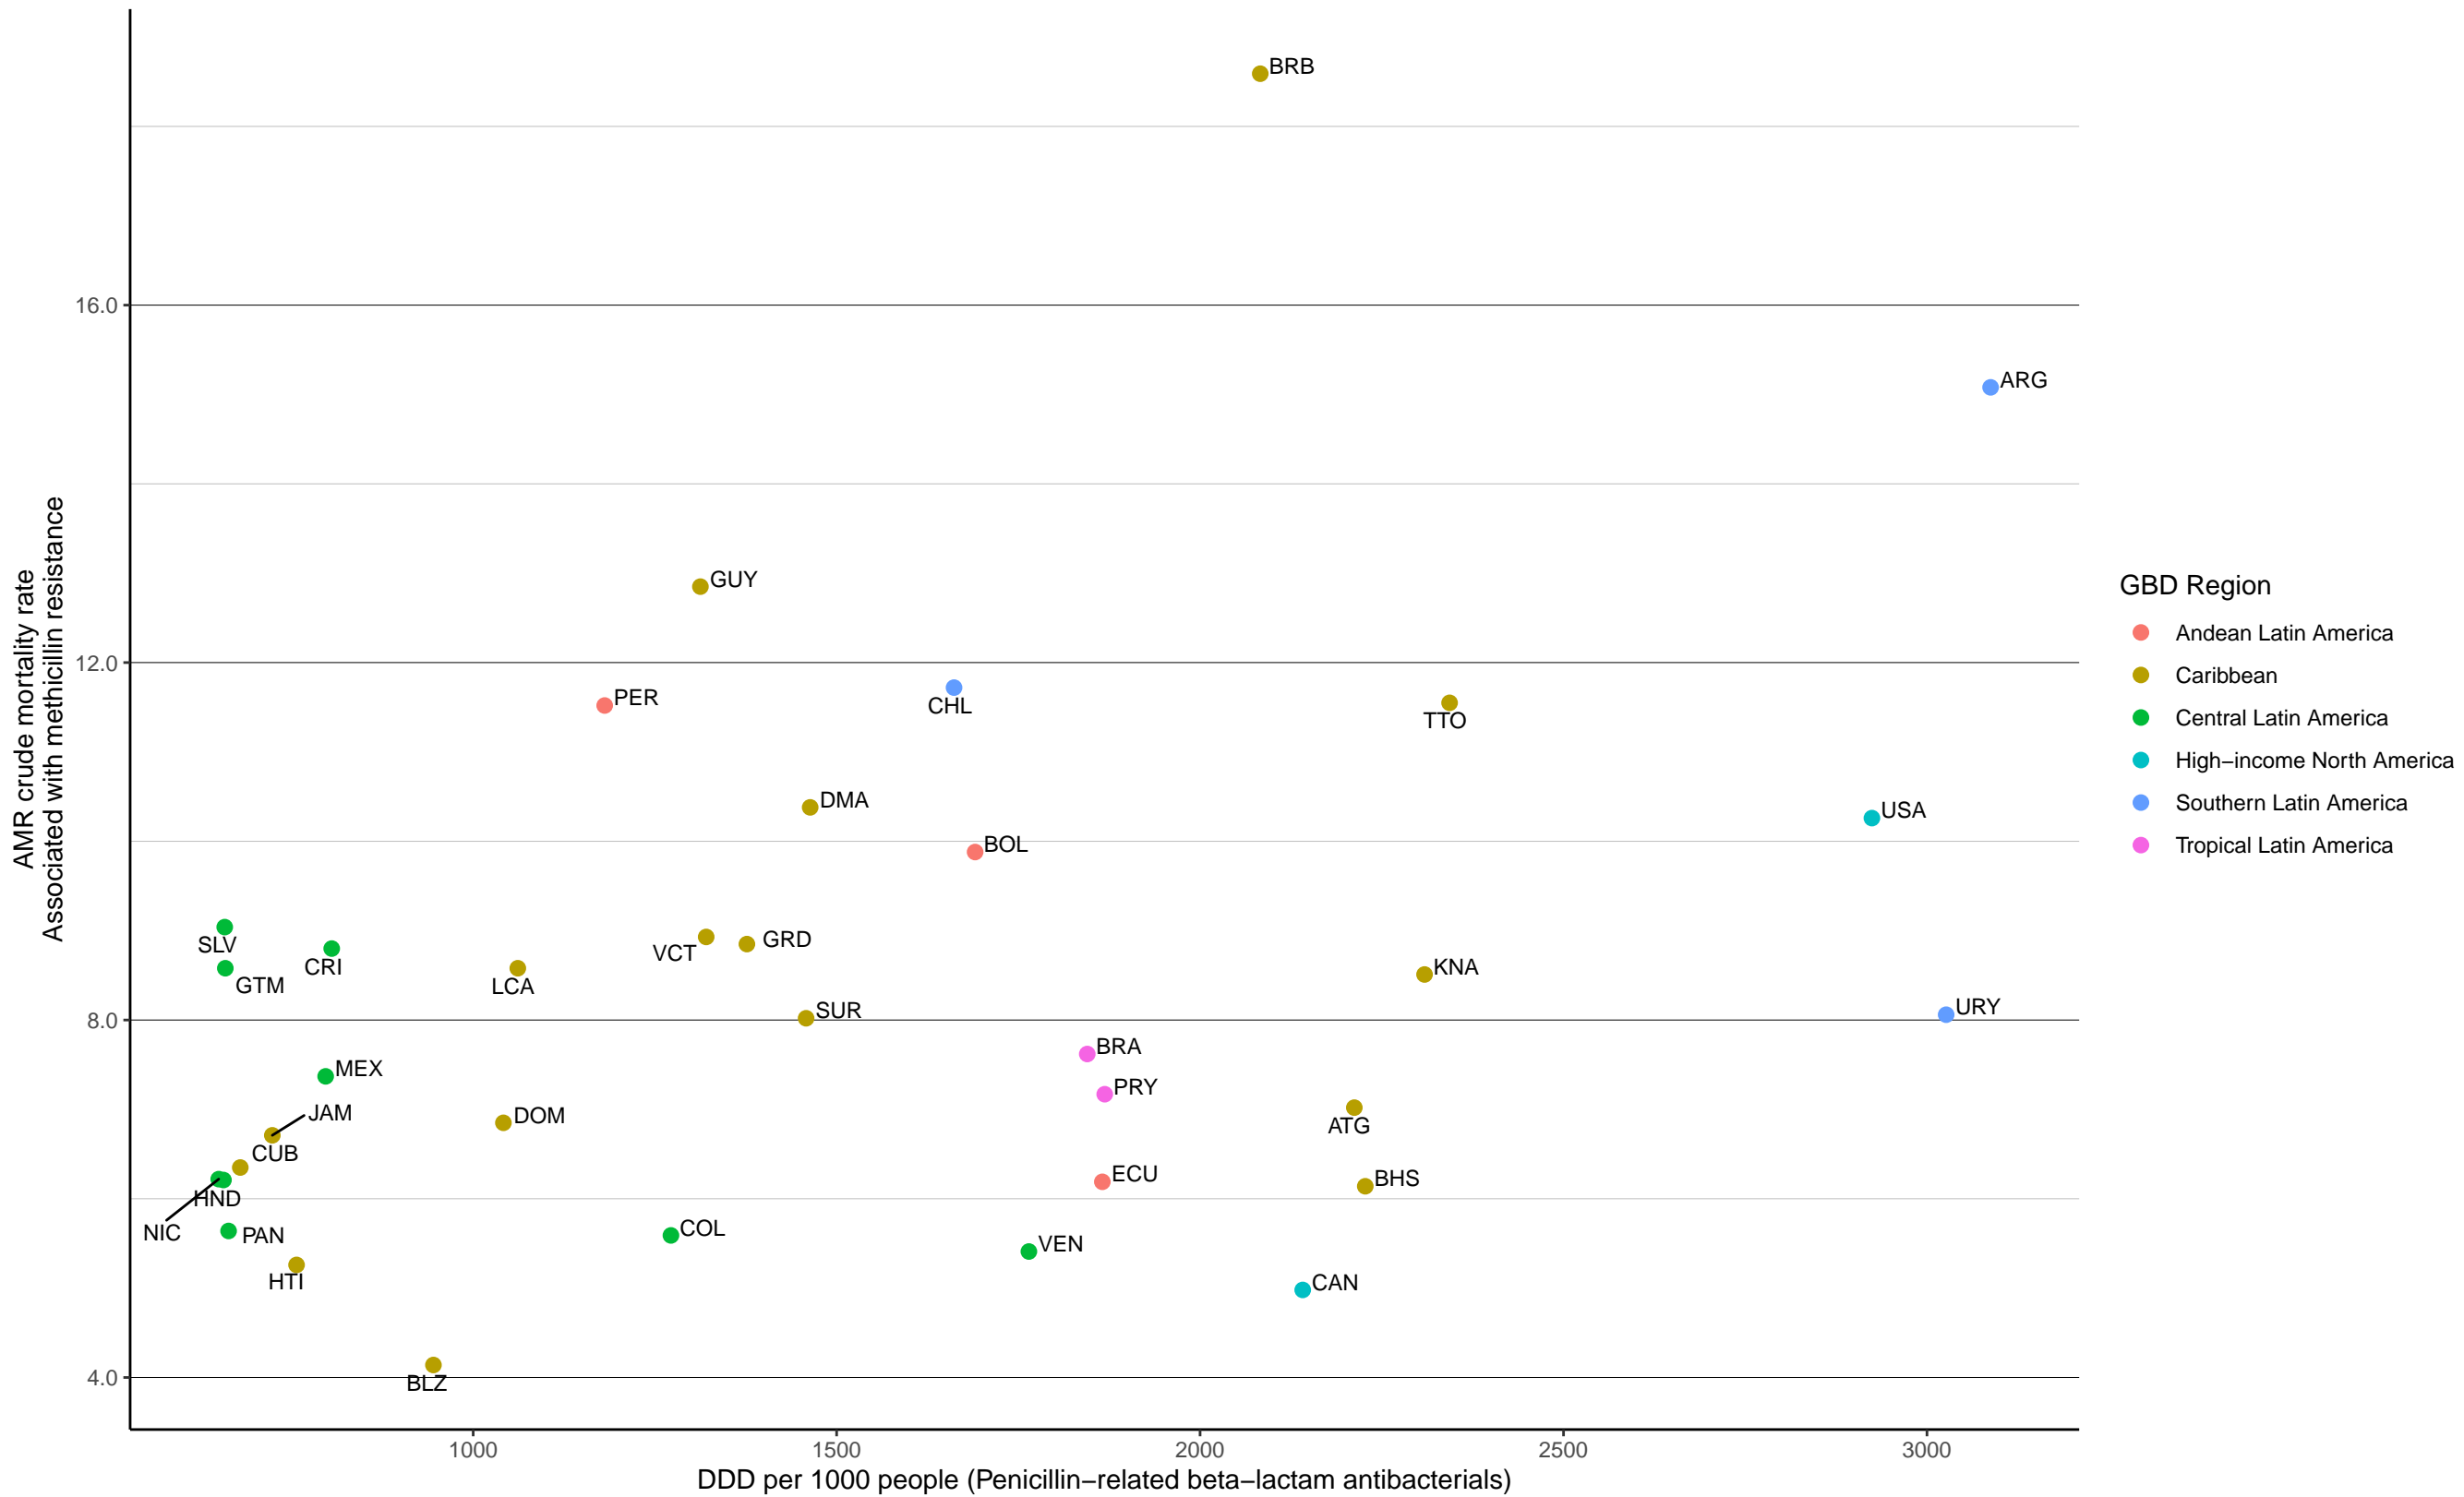

# Methicillin AMR—attributable mortality rate by J01C DDD per 1000 people, 2019

Correlation coefficient (95% confidence interval) = 0.37 (0.04,0.62)

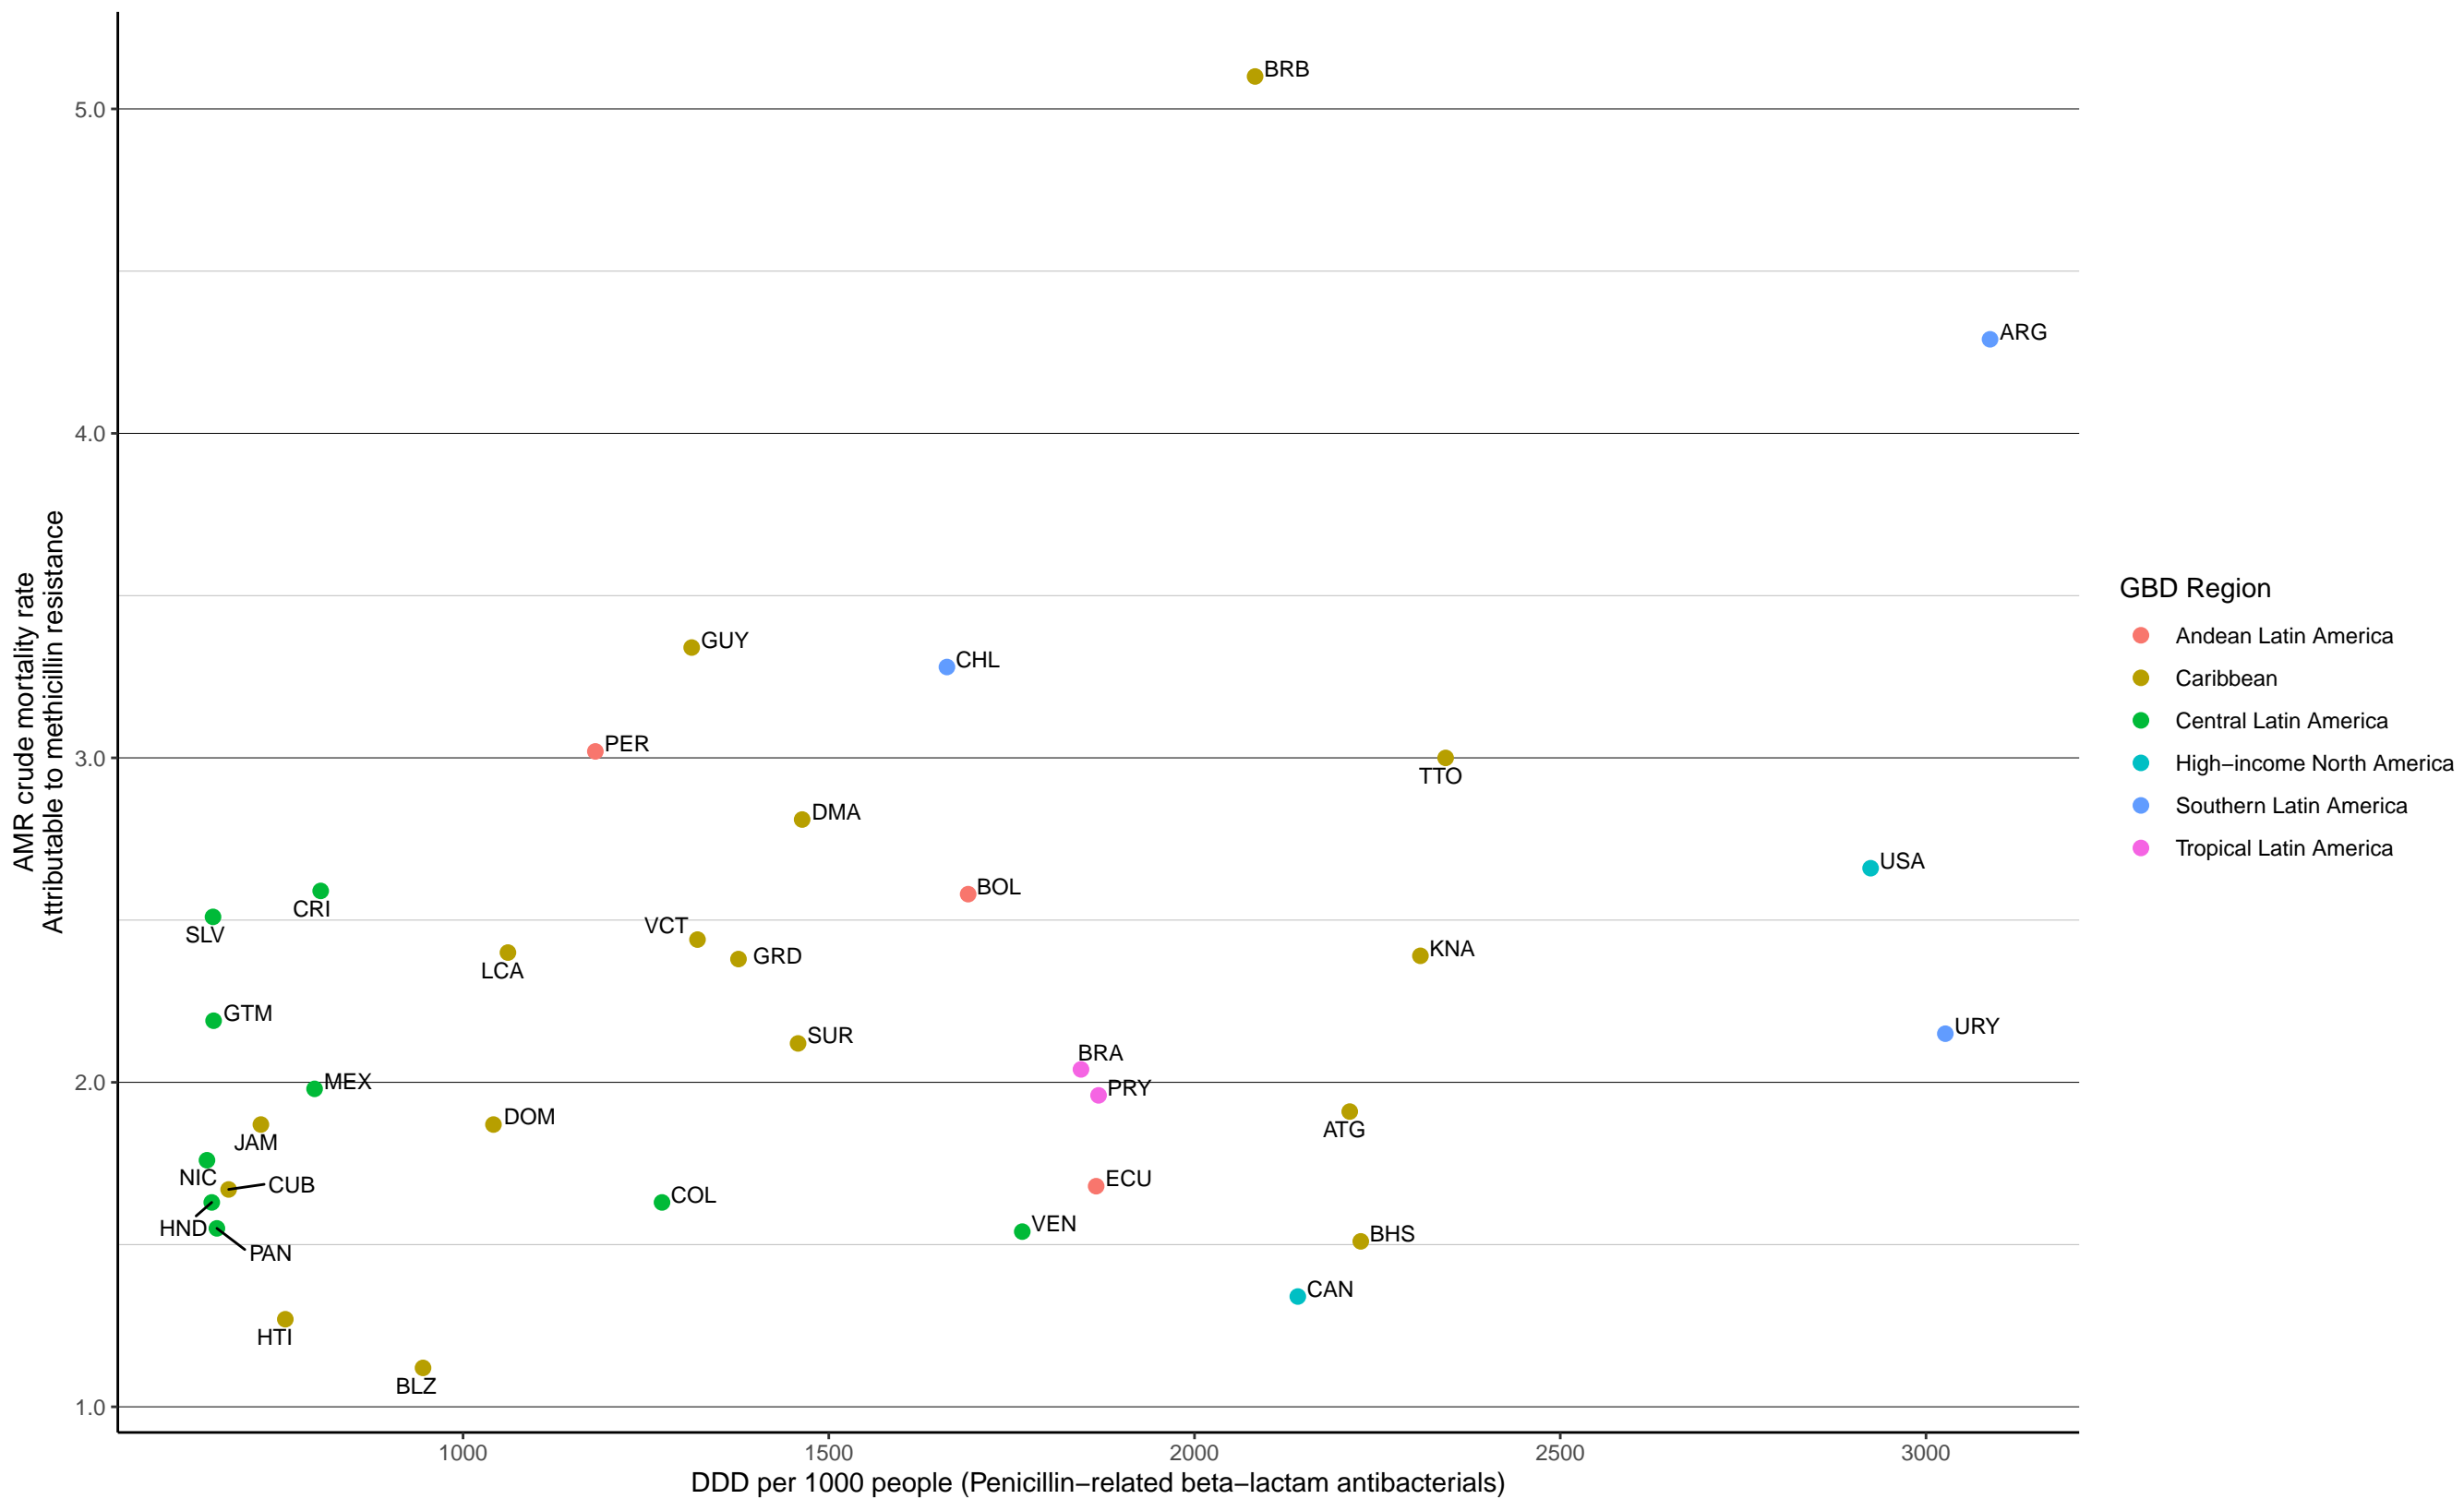

# Penicillin AMR-associated mortality rate by J01C DDD per 1000 people, 2019

Correlation coefficient (95% confidence interval) = 0.12 (-0.22,0.44)

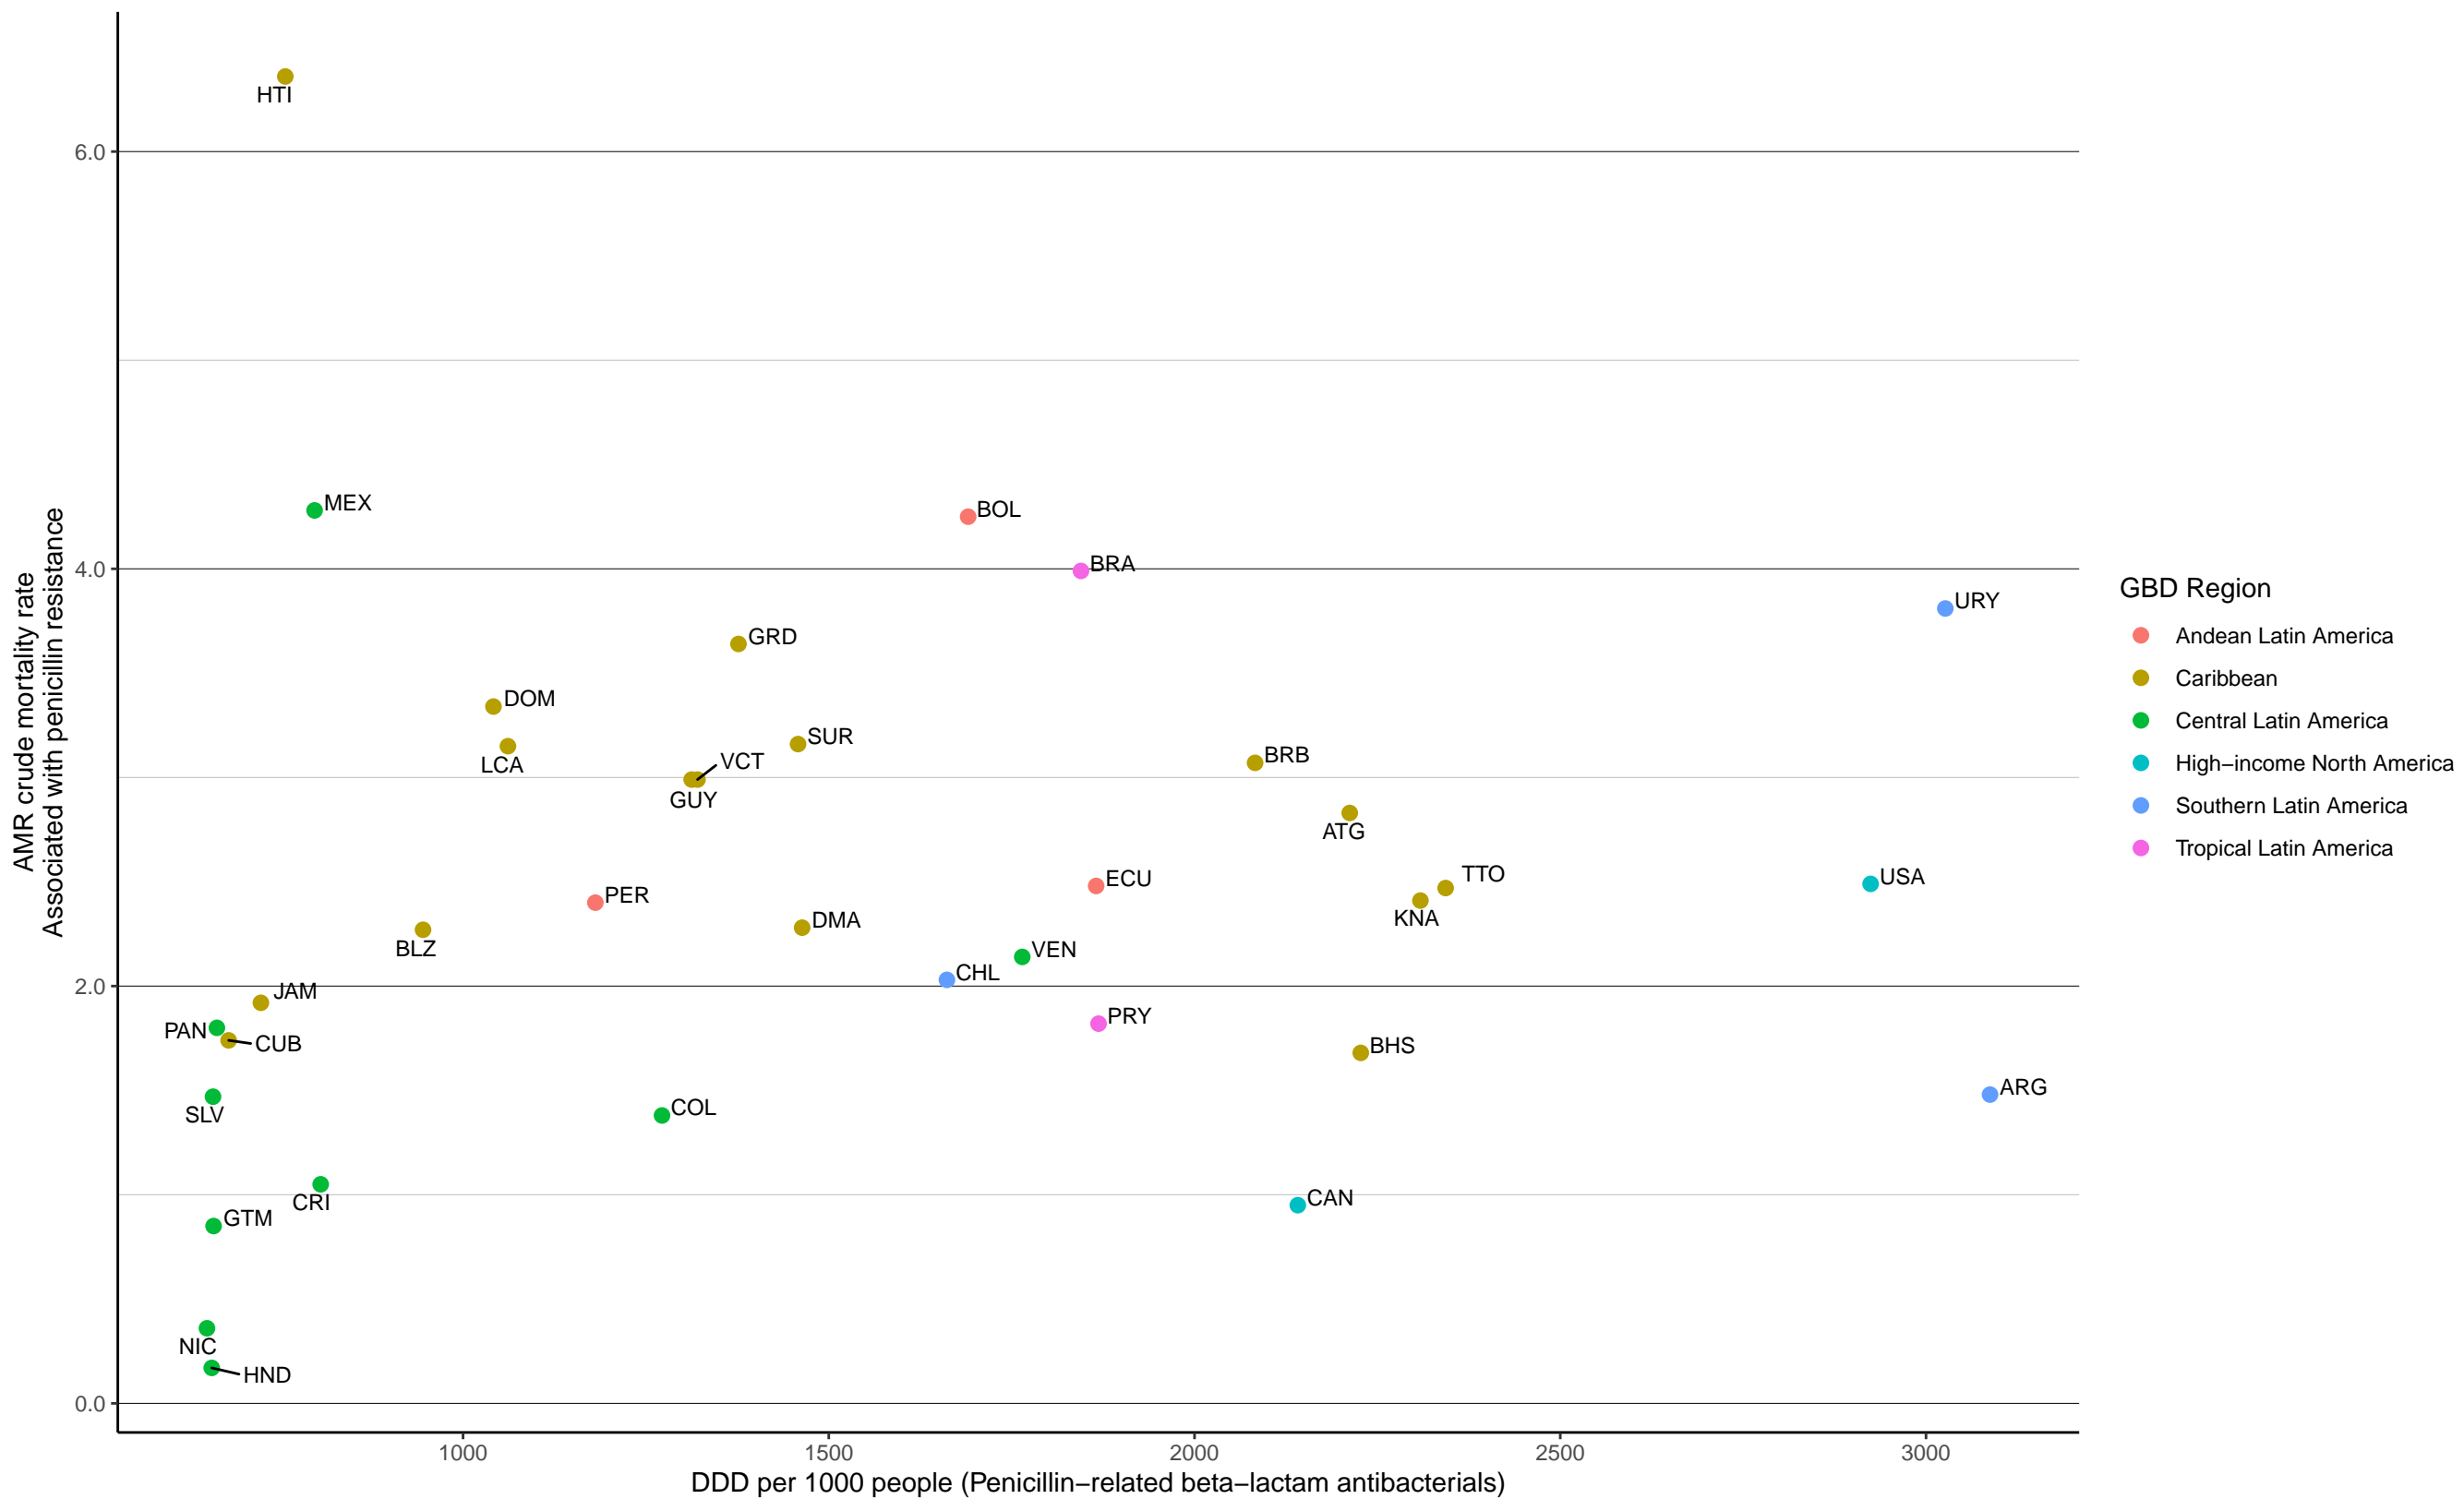

# Penicillin AMR—attributable mortality rate by J01C DDD per 1000 people, 2019

Correlation coefficient (95% confidence interval) =  $-0.02$  ( $-0.35, 0.32$ )

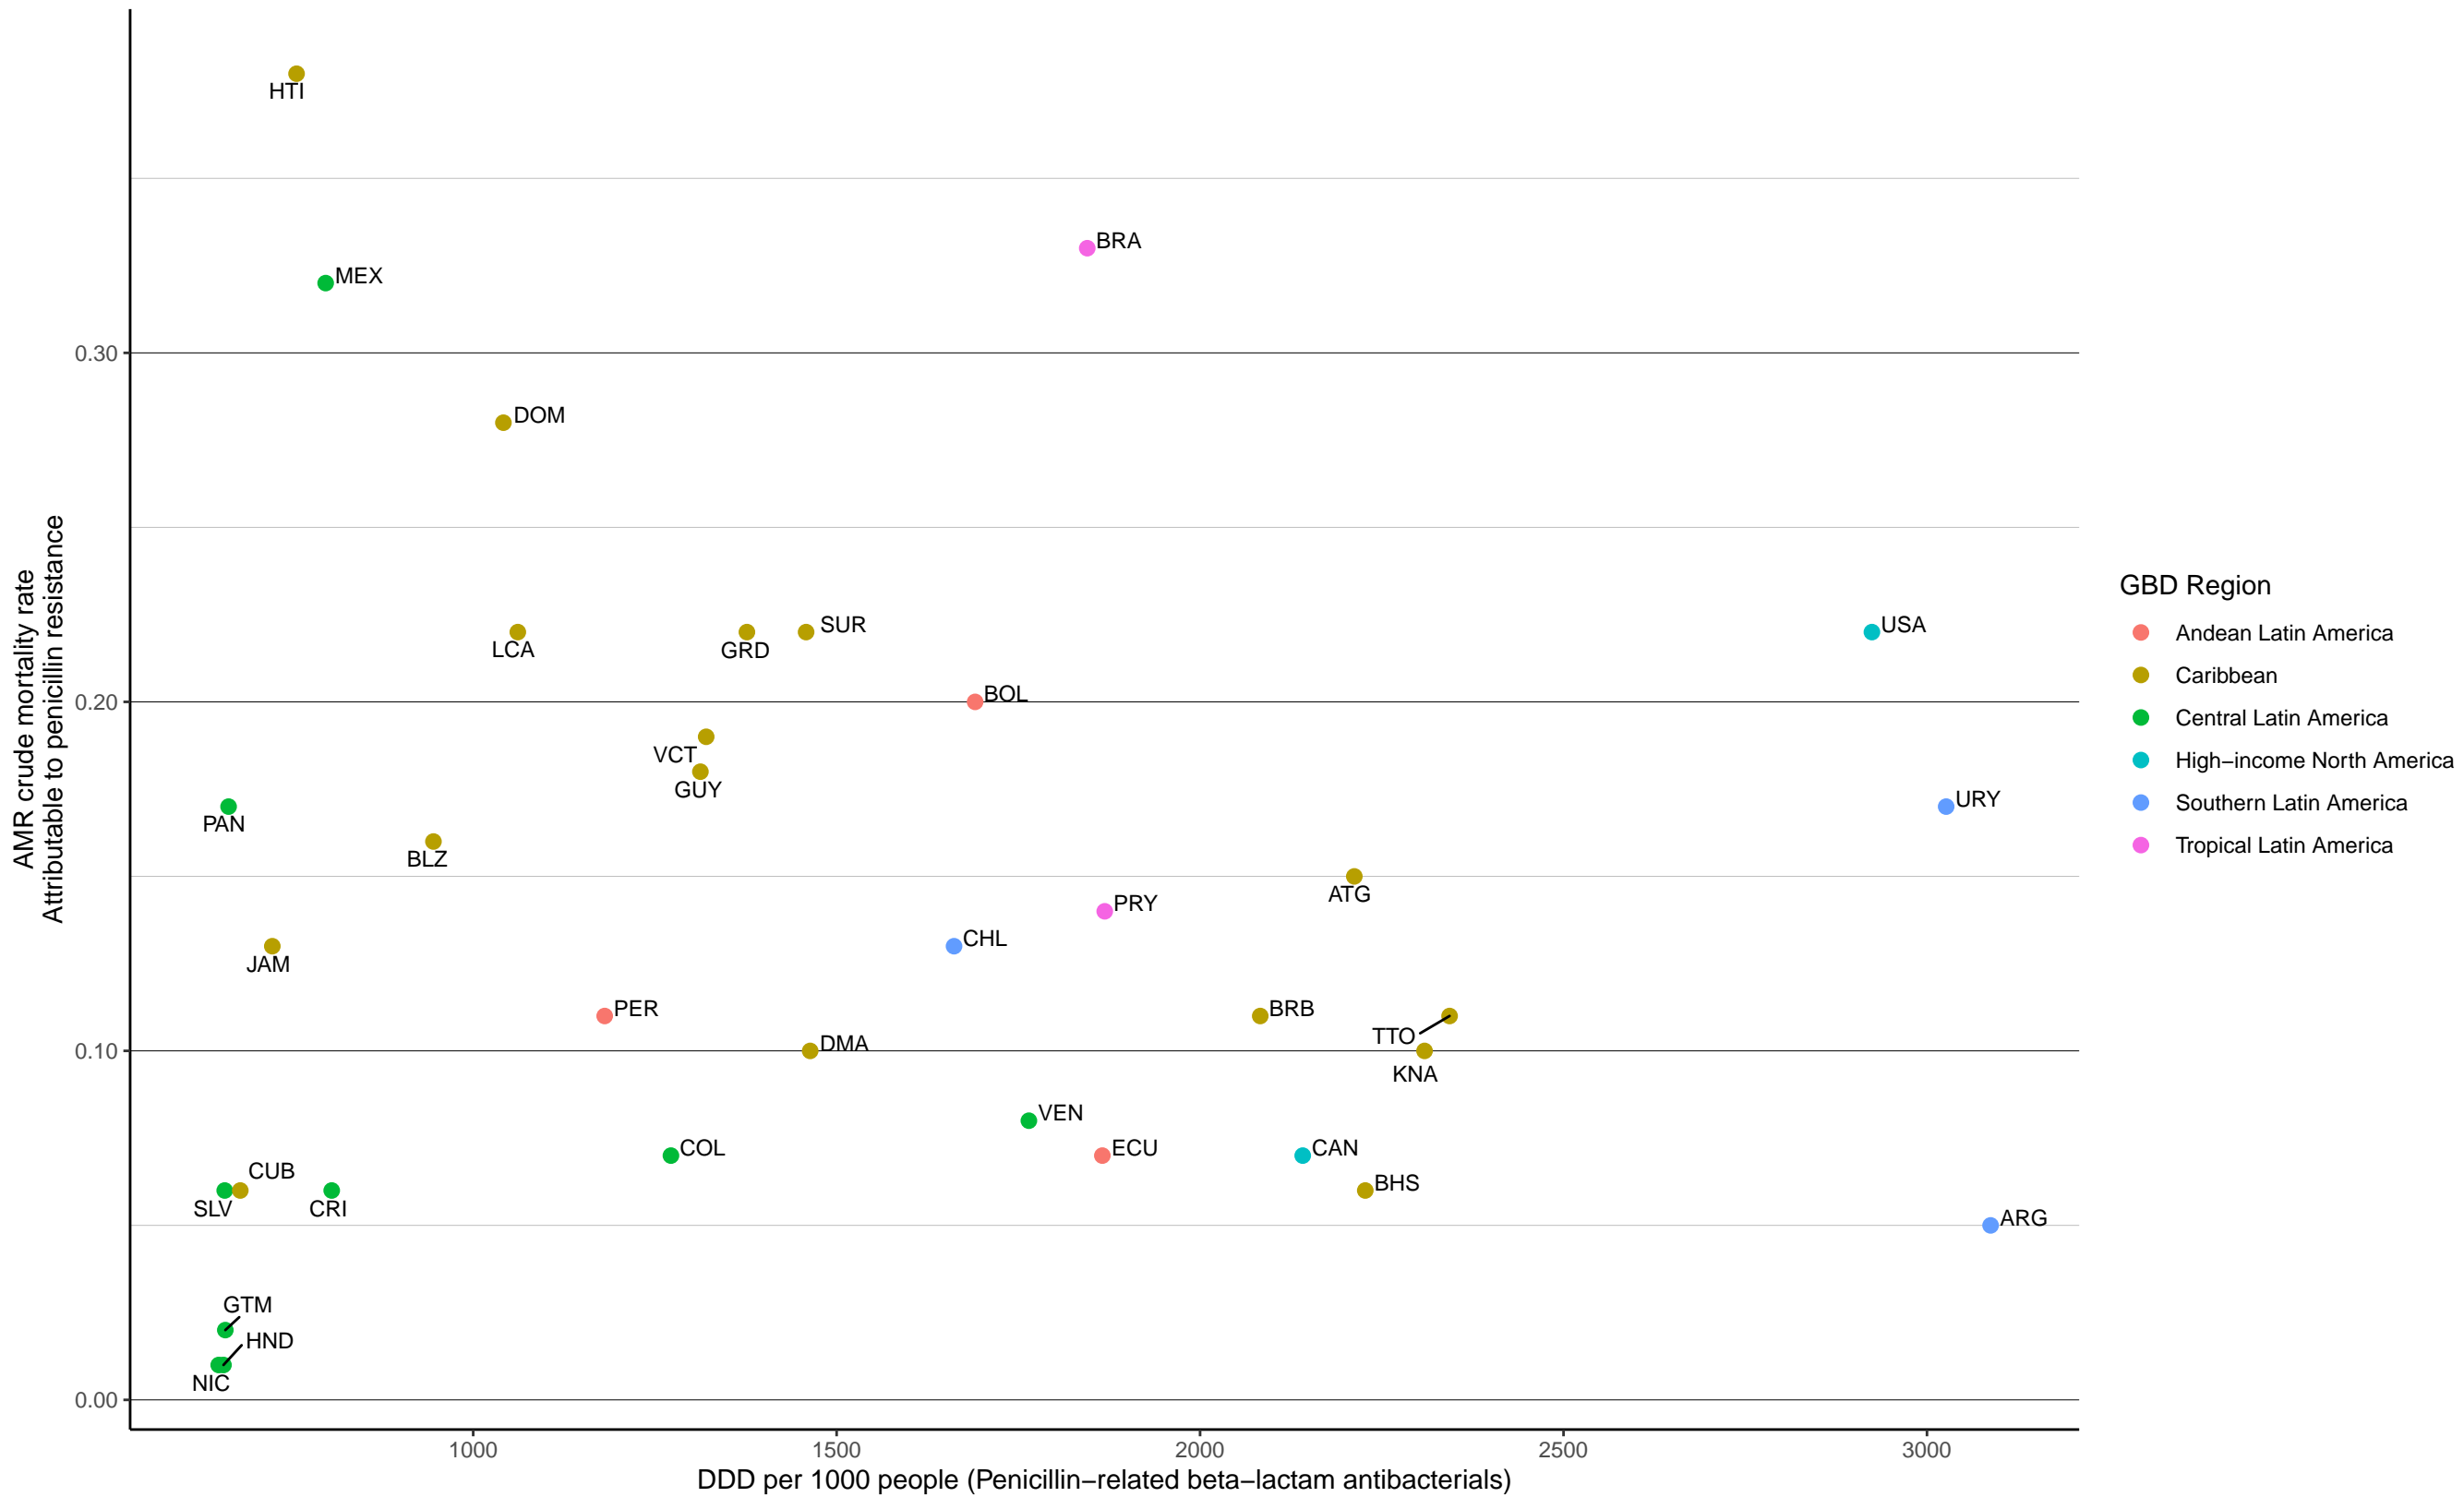

# Trimethoprim–Sulfamethoxazole AMR–associated mortality rate by J01E DDD per 1000 people, 2019

Correlation coefficient (95% confidence interval) =  $-0.09$  ( $-0.41, 0.25$ )

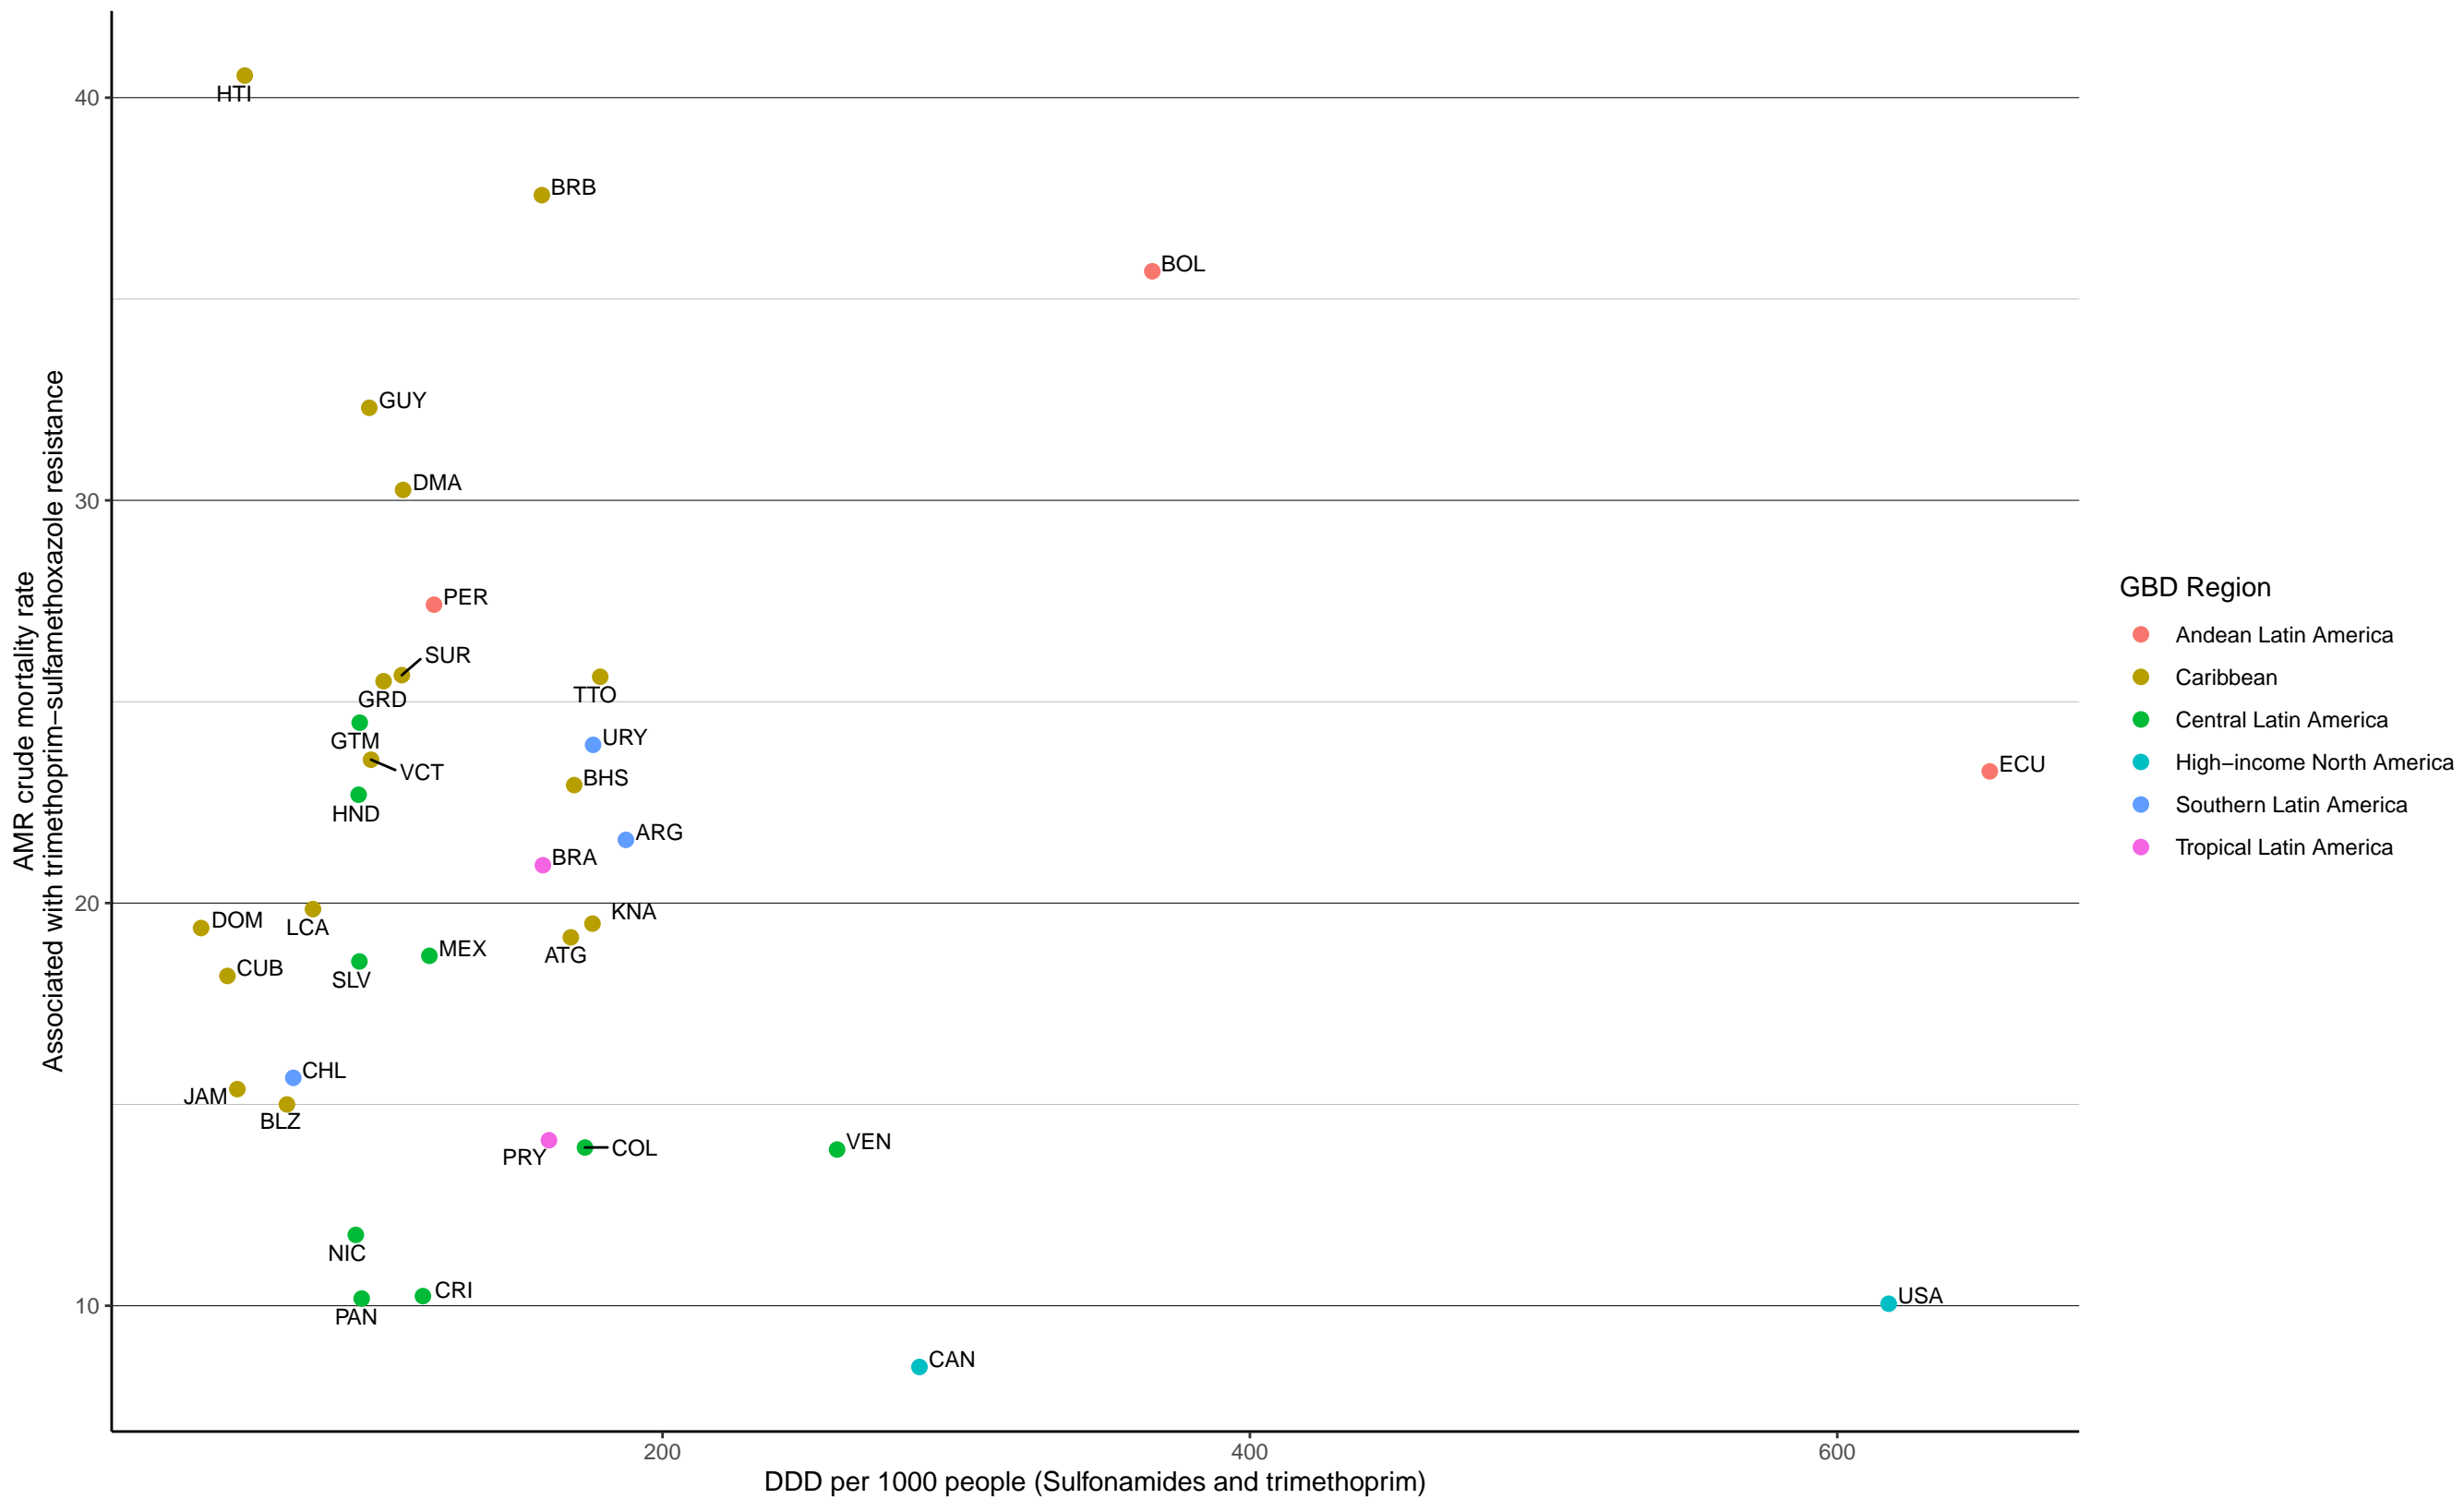

# Trimethoprim–Sulfamethoxazole AMR–attributable mortality rate by J01E DDD per 1000 people, 2019

Correlation coefficient (95% confidence interval) =  $-0.09$  ( $-0.41, 0.25$ )

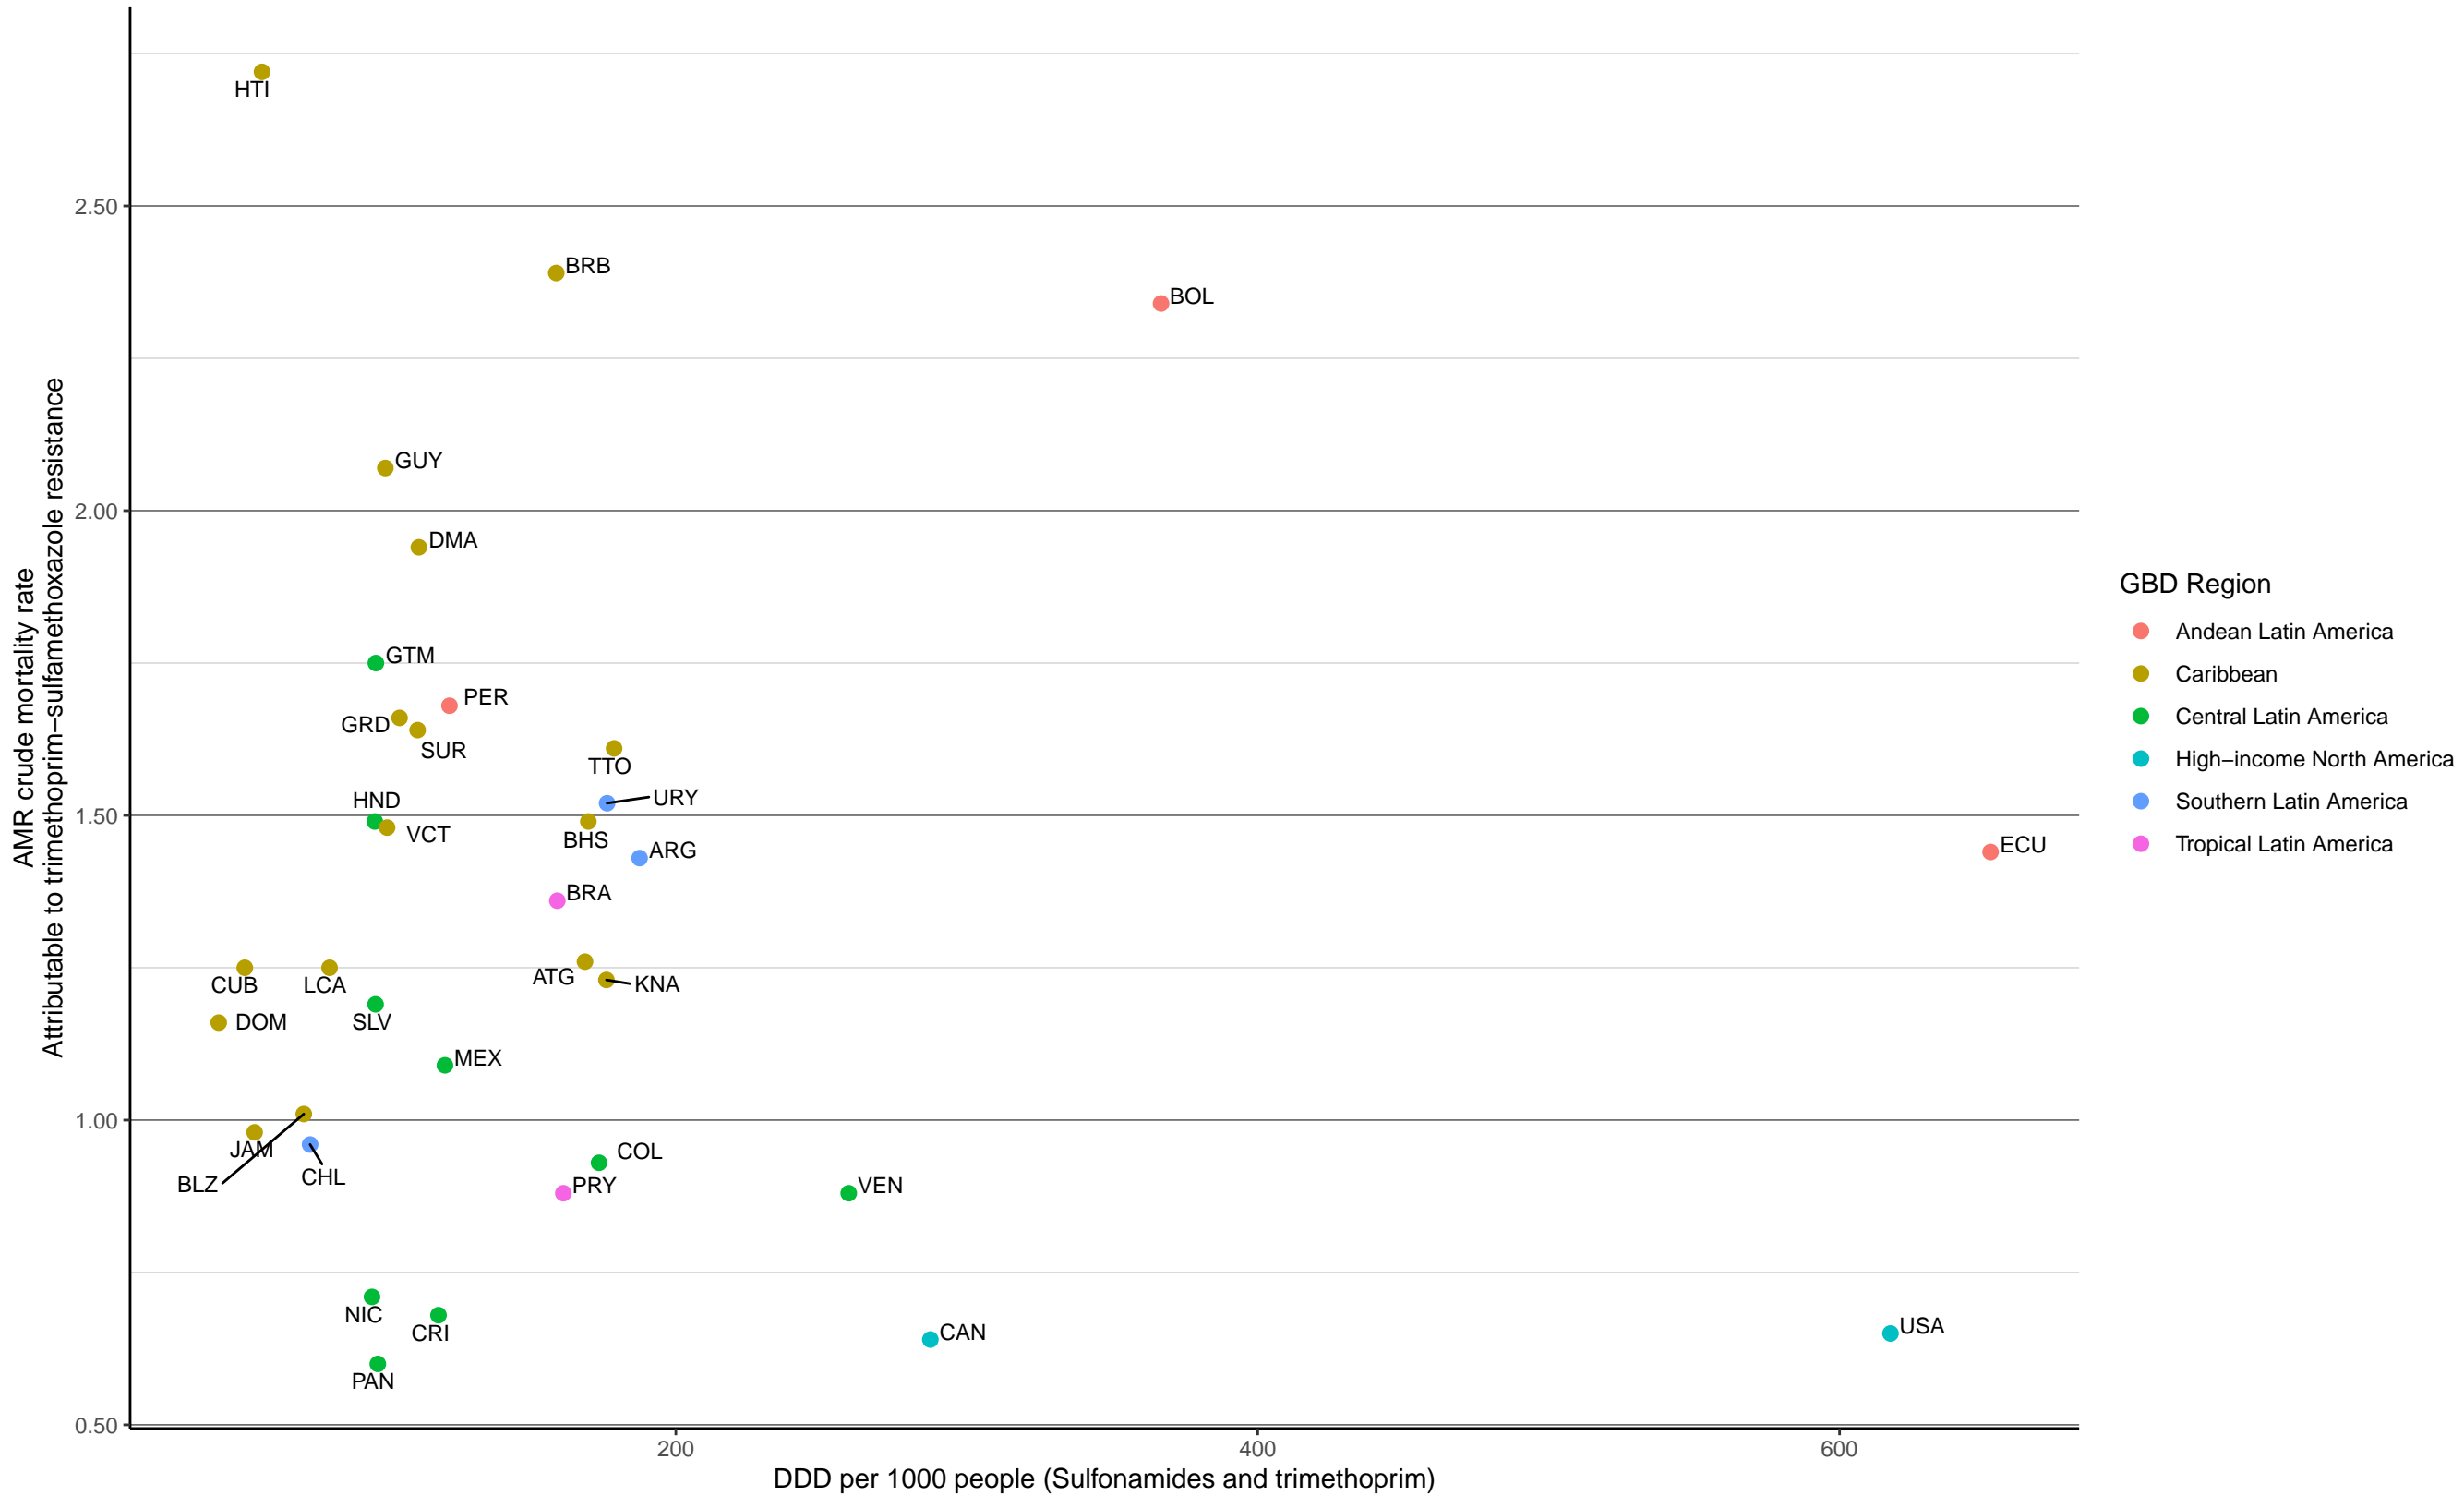



# Third-generation cephalosporin AMR-associated mortality rate by J01D DDD per 1000 people, 2019

Correlation coefficient (95% confidence interval) = 0.06 (-0.28,0.39)

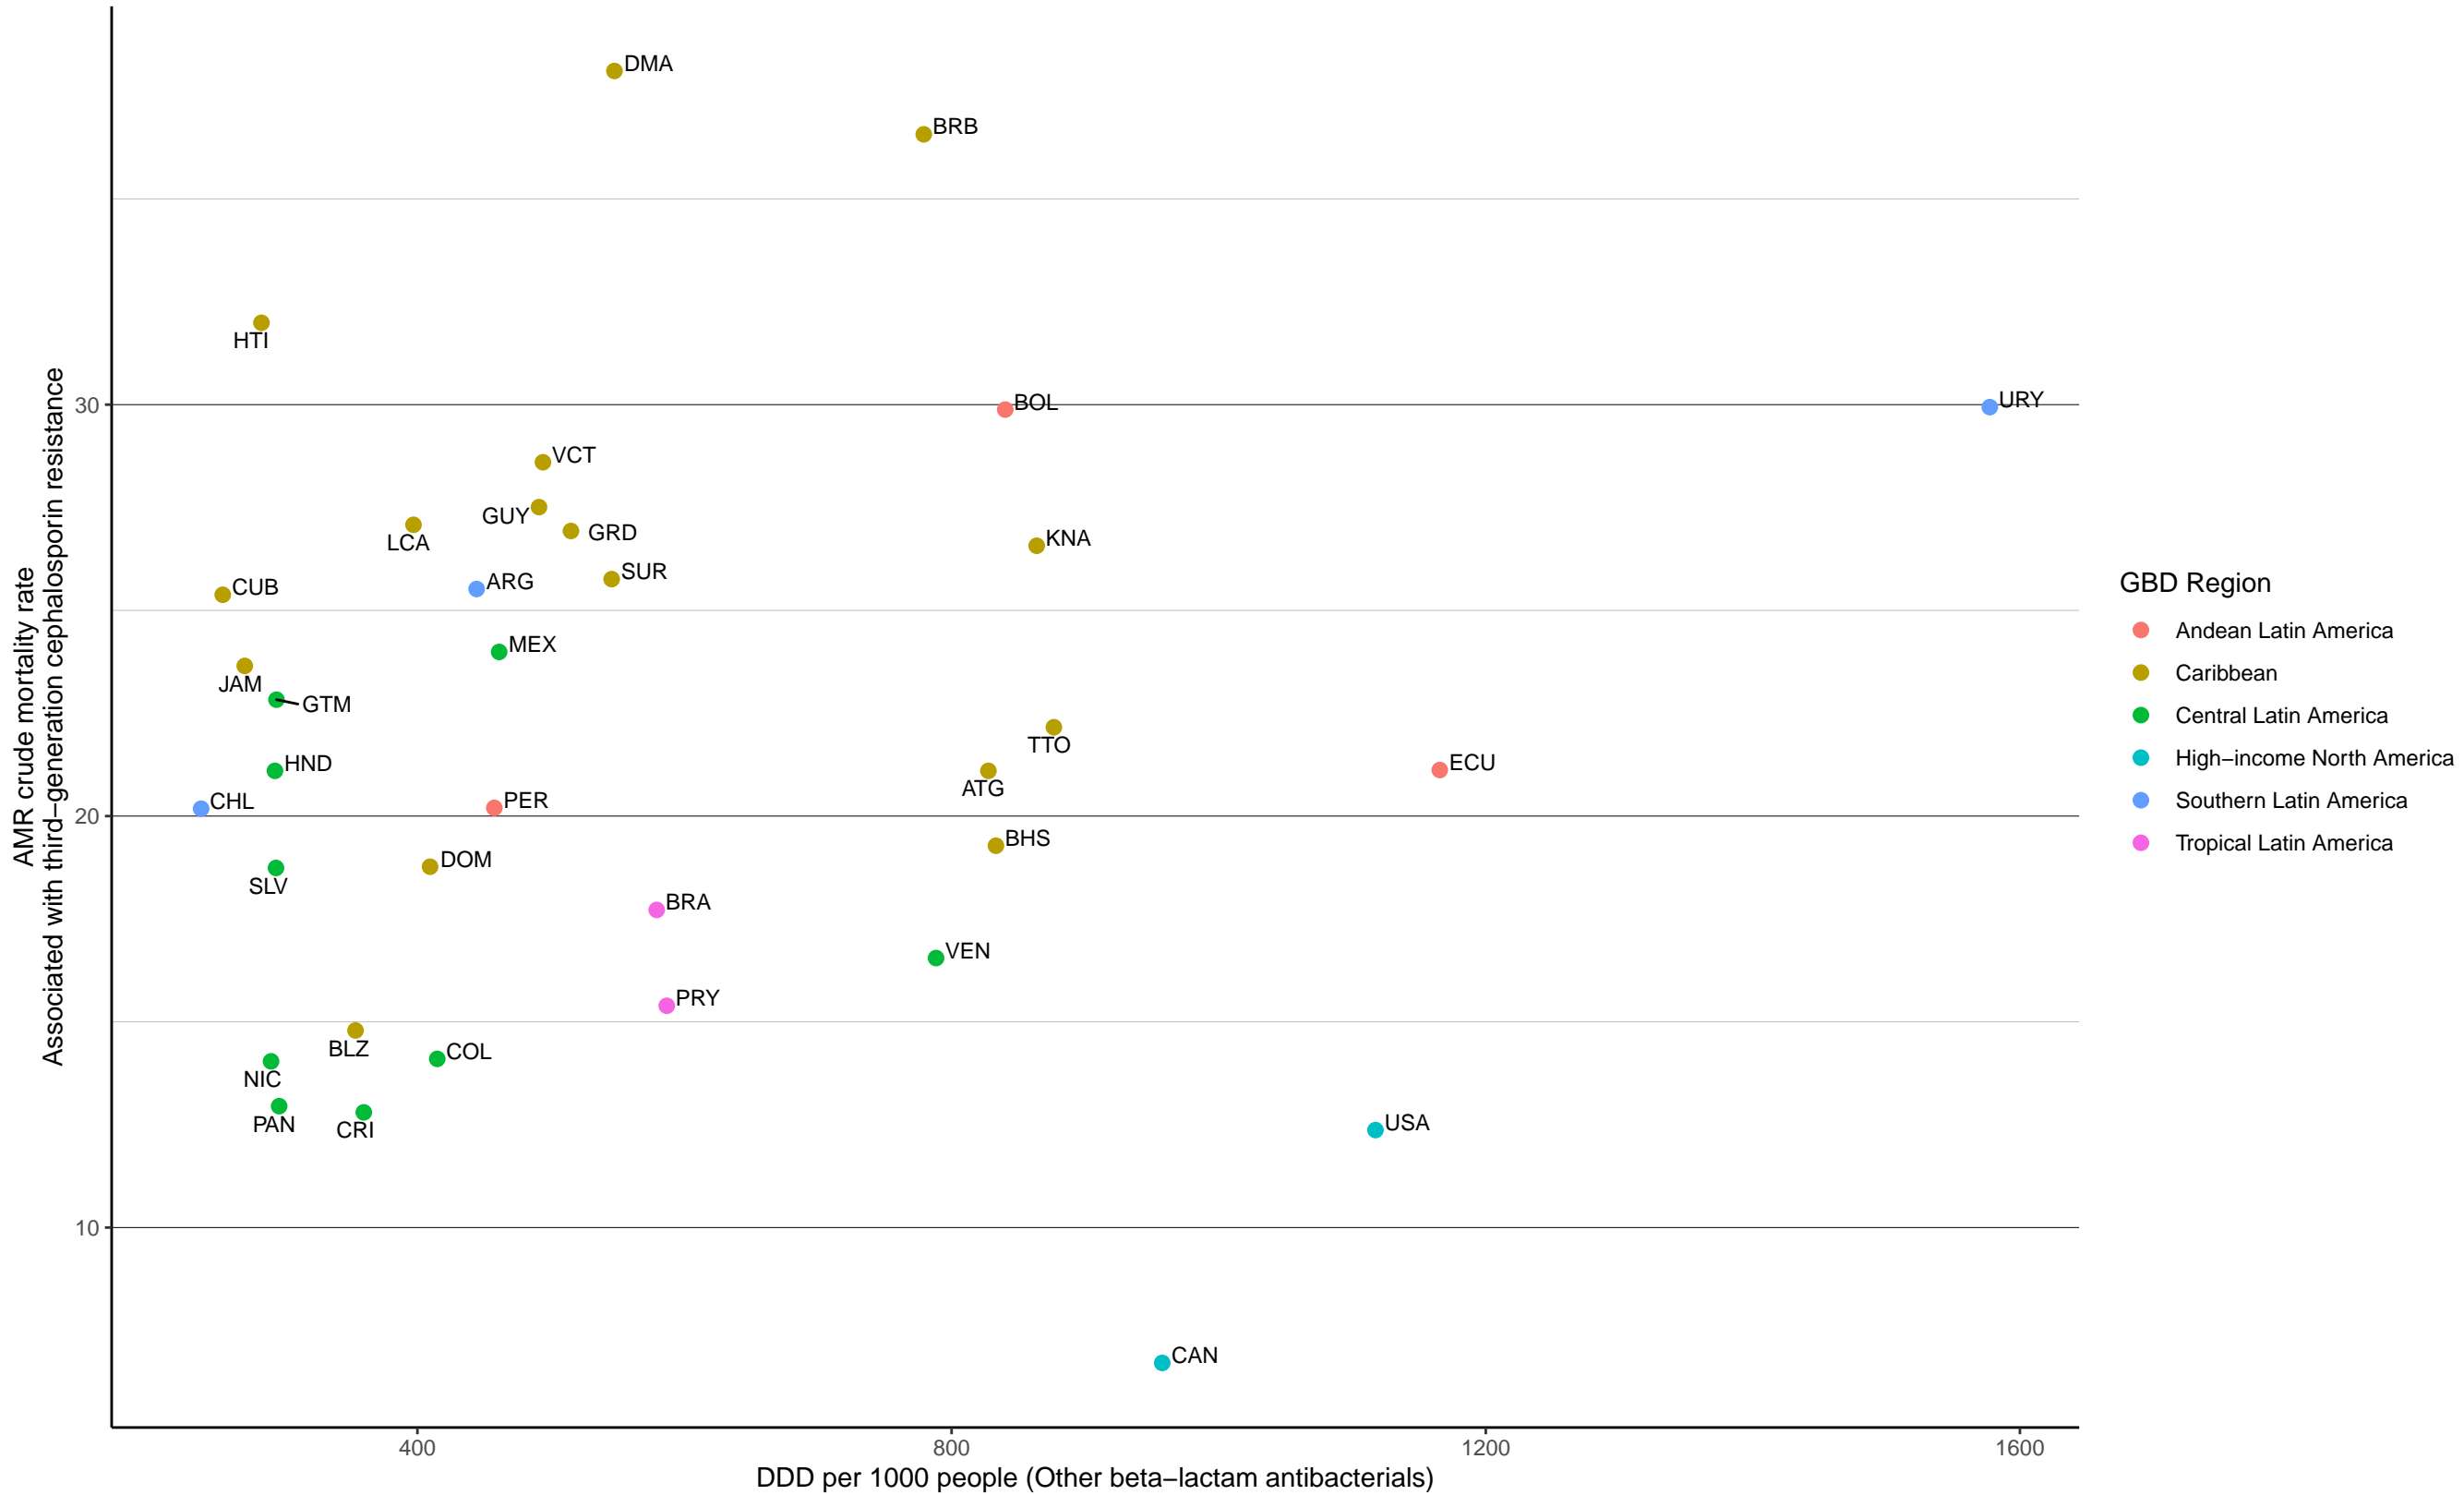

# Third-generation cephalosporin AMR-attributable mortality rate by J01D DDD per 1000 people, 2019

Correlation coefficient (95% confidence interval) =  $-0.02$  ( $-0.35, 0.32$ )

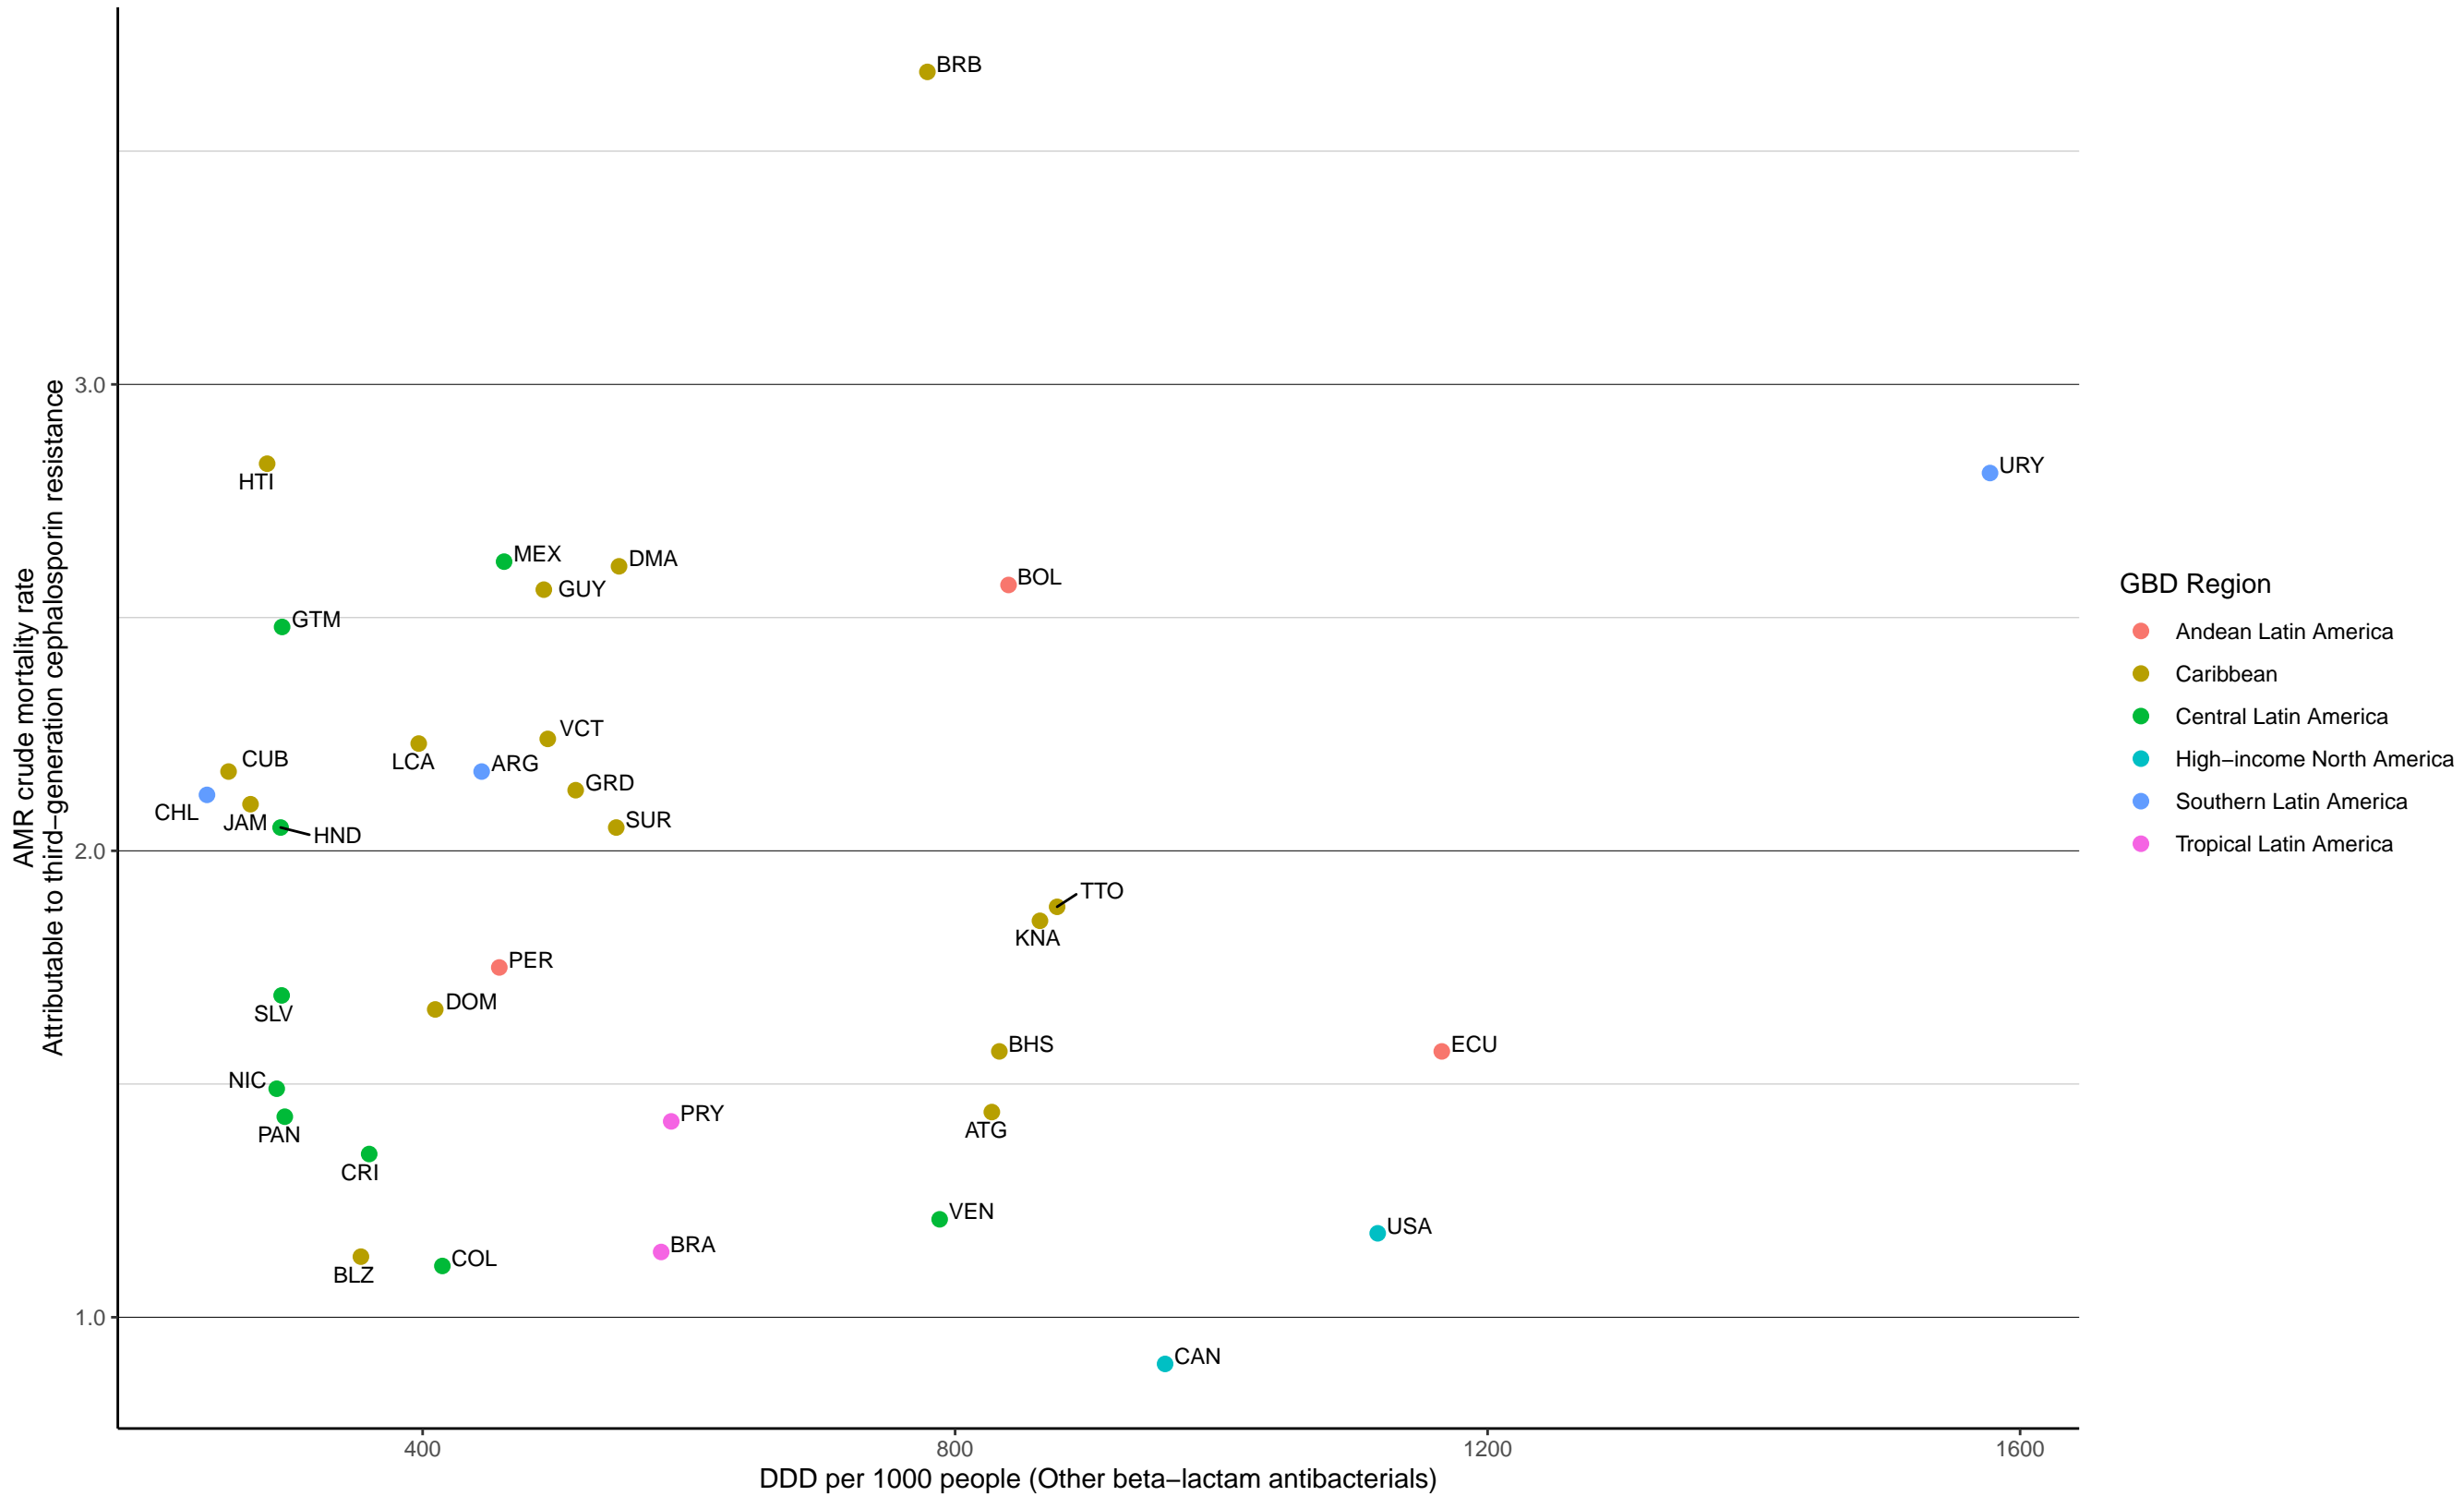

# Vancomycin AMR-associated mortality rate by J01D DDD per 1000 people, 2019

Correlation coefficient (95% confidence interval) = 0.44 (0.13,0.68)

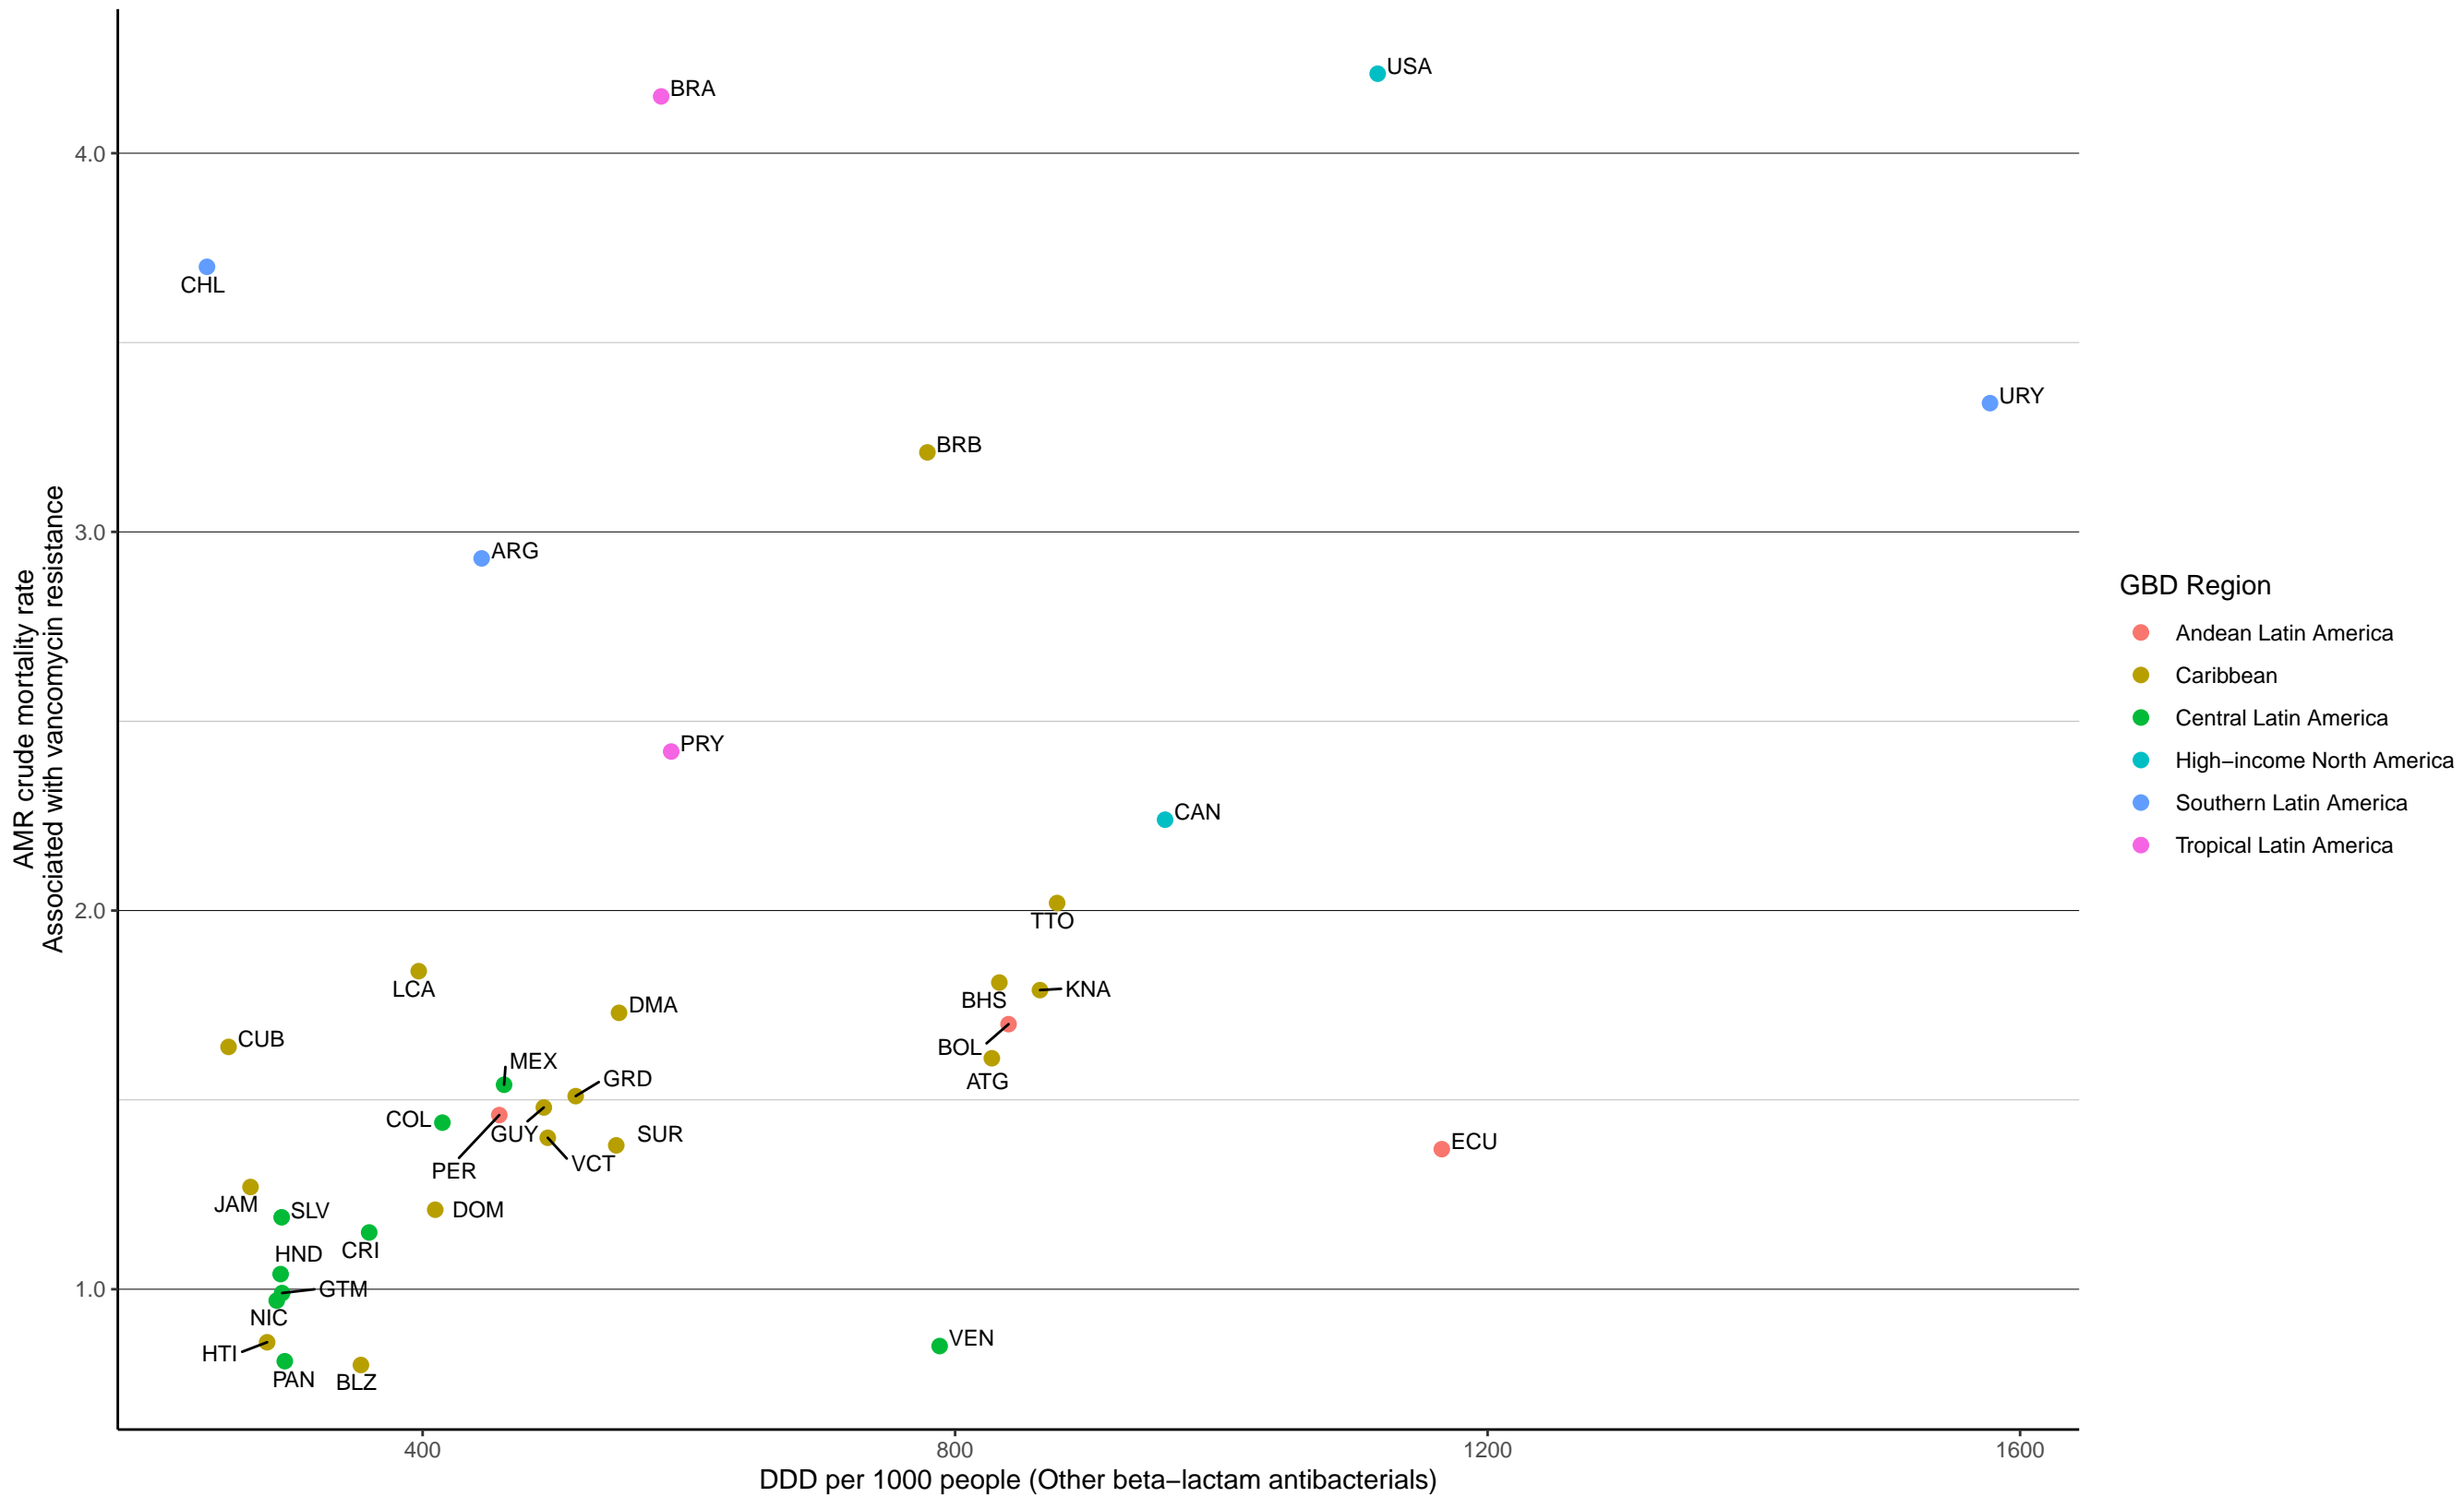

# Vancomycin AMR—attributable mortality rate by J01D DDD per 1000 people, 2019

Correlation coefficient (95% confidence interval) = 0.41 (0.09,0.66)

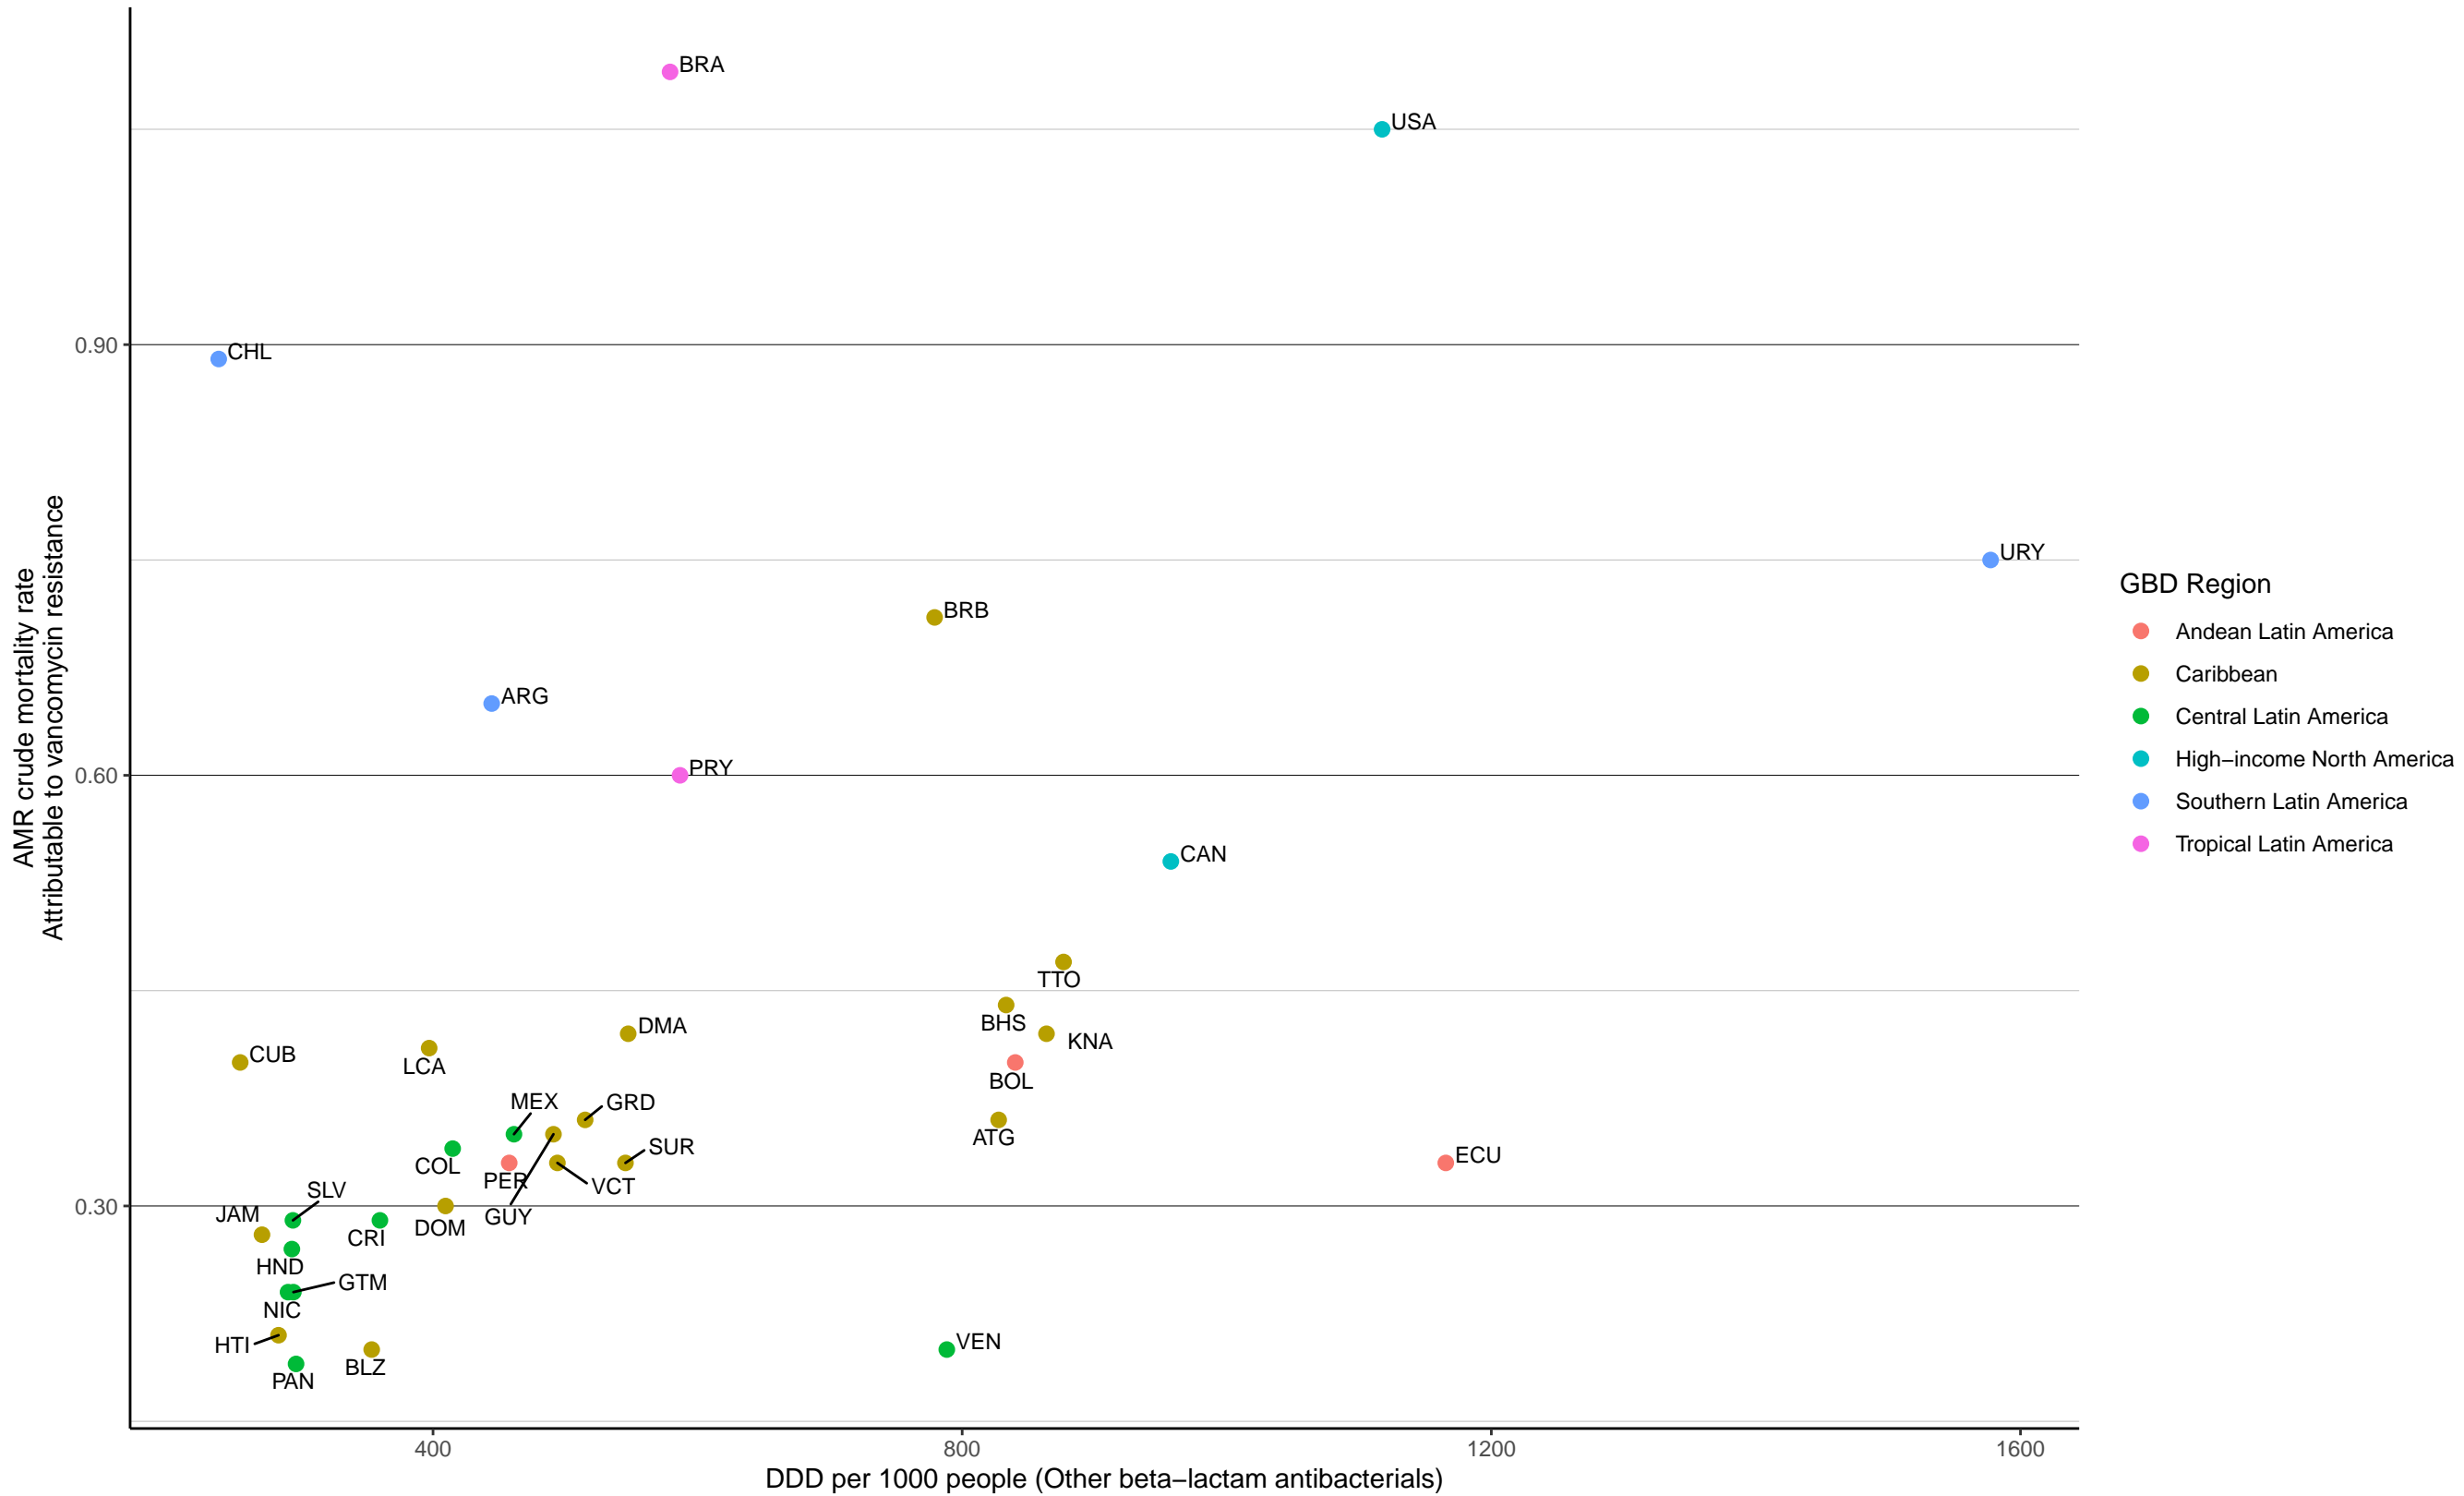

Supplement: mmc3.pdf [file mmc3.pdf]
