# Supplementary material for: The burden of antimicrobial resistance in the Americas in 2019: a cross-country systematic analysis
Source: PubMed Central journal article supplement — Lancet Reg Health Am. 2023 Aug 8;25:100561. doi: 10.1016/j.lana.2023.100561 (PMC10505822; doi:10.1016/j.lana.2023.100561), 2023-08-08
Supplement: mmc4.pdf [file mmc4.pdf]

**Supplemental Appendix 4. Summary of AMR deaths and DALYs by infectious syndrome for the WHO Region of the Americas countries, 2019**

| Country             | Infectious Syndrome            | Attributable DALYs Counts | Age standardised rate per 100k | Associated DALYs Counts | Age standardised rate per 100k | Attributable Death Counts | Age standardised rate per 100k | Associated Death Counts | Age standardised rate per 100k |
|---------------------|--------------------------------|---------------------------|--------------------------------|-------------------------|--------------------------------|---------------------------|--------------------------------|-------------------------|--------------------------------|
| Antigua and Barbuda | All                            | 49 (33-68)                | 55.6 (37.9-77.1)               | 1,150 (755-1,640)       | 1303.6 (862.3-1859.9)          | 12 (8-18)                 | 14.2 (9.5-20.2)                | 291 (187-432)           | 329.2 (212-482.1)              |
| Antigua and Barbuda | Bacterial skin infections      | 4 (2-6)                   | 4.2 (2.4-7.1)                  | 73 (42-126)             | 78 (45.6-133.1)                | 1 (0-1)                   | 0.9 (0.5-1.6)                  | 17 (9-29)               | 17.7 (9.7-30.2)                |
| Antigua and Barbuda | Bone and joint infections      | 0 (0-0)                   | 0.2 (0.1-0.6)                  | 4 (1-10)                | 4.5 (1.3-10.6)                 | 0 (0-0)                   | 0.1 (0-0.1)                    | 1 (0-3)                 | 1.2 (0.3-2.8)                  |
| Antigua and Barbuda | BSI                            | 17 (9-28)                 | 18.6 (9.8-31.6)                | 407 (216-656)           | 465.5 (251.7-744)              | 4 (2-7)                   | 5 (2.6-8.4)                    | 108 (57-176)            | 122.9 (66.6-199.9)             |
| Antigua and Barbuda | Cardiac infections             | 1 (1-1)                   | 1 (0.7-1.3)                    | 26 (19-35)              | 26.2 (19.4-35.2)               | 0 (0-0)                   | 0.3 (0.2-0.4)                  | 7 (5-9)                 | 7 (5-9.5)                      |
| Antigua and Barbuda | CNS infections                 | 0 (0-1)                   | 0.5 (0.3-0.8)                  | 18 (12-28)              | 23.9 (15.4-36.8)               | 0 (0-0)                   | 0.1 (0.1-0.2)                  | 4 (3-7)                 | 5.5 (3.4-8.9)                  |
| Antigua and Barbuda | Diarrhoea                      | 0 (0-0)                   | 0 (0-0)                        | 1 (1-2)                 | 1.6 (0.8-2.8)                  | 0 (0-0)                   | 0 (0-0)                        | 0 (0-0)                 | 0.3 (0.2-0.5)                  |
| Antigua and Barbuda | Gonorrhoea and chlamydia       |                           |                                | 1 (0-1)                 | 0.8 (0.4-1.6)                  |                           |                                | 0 (0-0)                 | 0.1 (0-0.2)                    |
| Antigua and Barbuda | Intra-abdominal infections     | 8 (5-13)                  | 8.8 (5.6-13.3)                 | 198 (122-305)           | 199.3 (122.6-306.9)            | 2 (1-3)                   | 2.2 (1.4-3.4)                  | 50 (30-81)              | 50.8 (29.9-81.1)               |
| Antigua and Barbuda | LRI and thorax infections      | 14 (10-20)                | 17.3 (12.7-23.4)               | 335 (233-465)           | 414.2 (288.7-574.8)            | 4 (3-5)                   | 4.4 (3.1-6)                    | 83 (56-120)             | 102 (69.1-145.4)               |
| Antigua and Barbuda | TB                             | 0 (0-0)                   | 0 (0-0)                        | 0 (0-1)                 | 0.4 (0.1-1.3)                  | 0 (0-0)                   | 0 (0-0)                        | 0 (0-1)                 | 0.1 (0-0.5)                    |
| Antigua and Barbuda | Typhoid, paratyphoid, and iNTS | 0 (0-0)                   | 0 (0-0)                        | 0 (0-0)                 | 0.1 (0-0.1)                    | 0 (0-0)                   | 0 (0-0)                        | 0 (0-0)                 | 0 (0-0)                        |
| Antigua and Barbuda | UTI                            | 4 (3-6)                   | 4.9 (3.5-6.9)                  | 85 (59-120)             | 89.1 (62.7-125.3)              | 1 (1-2)                   | 1.2 (0.8-1.7)                  | 21 (14-30)              | 21.7 (14.9-31.7)               |

|           |                                |                        |                  |                           |                        |                      |                  |                           |                     |
|-----------|--------------------------------|------------------------|------------------|---------------------------|------------------------|----------------------|------------------|---------------------------|---------------------|
| Argentina | All                            | 35,300 (27,400-44,700) | 65.1 (50.4-82.6) | 701,000 (525,000-917,000) | 1413.3 (1049.9-1851.1) | 8,980 (6,780-11,800) | 16.6 (12.5-21.8) | 178,000 (131,000-240,000) | 358.7 (262.3-486.5) |
| Argentina | Bacterial skin infections      | 1,080 (618-1,830)      | 2 (1.1-3.3)      | 18,500 (10,200-32,400)    | 34.9 (19.3-60.4)       | 259 (139-447)        | 0.5 (0.3-0.8)    | 4,420 (2,350-7,800)       | 8.4 (4.4-14.7)      |
| Argentina | Bone and joint infections      | 68 (18-160)            | 0.1 (0-0.3)      | 1,370 (371-3,290)         | 2.6 (0.7-6.3)          | 18 (5-43)            | 0 (0-0.1)        | 356 (98-857)              | 0.7 (0.2-1.7)       |
| Argentina | BSI                            | 7,820 (4,260-13,100)   | 14.8 (8.2-24.7)  | 188,000 (107,000-298,000) | 400.7 (236.9-621.6)    | 2,050 (1,090-3,430)  | 3.9 (2.1-6.5)    | 49,100 (27,400-78,700)    | 104.9 (60.5-165.3)  |
| Argentina | Cardiac infections             | 849 (686-1,040)        | 1.5 (1.3-1.9)    | 16,400 (13,600-20,700)    | 31.4 (26-39.8)         | 223 (172-278)        | 0.4 (0.3-0.5)    | 4,280 (3,400-5,450)       | 8.2 (6.5-10.5)      |
| Argentina | CNS infections                 | 168 (126-238)          | 0.3 (0.3-0.5)    | 6,860 (5,060-9,560)       | 15.9 (11.6-22.2)       | 39 (29-57)           | 0.1 (0.1-0.1)    | 1,590 (1,140-2,280)       | 3.7 (2.6-5.3)       |
| Argentina | Diarrhoea                      | 22 (11-39)             | 0 (0-0.1)        | 1,440 (757-2,430)         | 3.5 (1.9-6.2)          | 5 (2-9)              | 0 (0-0)          | 278 (142-484)             | 0.7 (0.3-1.2)       |
| Argentina | Gonorrhoea and chlamydia       |                        |                  | 262 (147-432)             | 0.6 (0.3-0.9)          |                      |                  | 26 (8-51)                 | 0.1 (0-0.1)         |
| Argentina | Intra-abdominal infections     | 5,600 (3,750-7,930)    | 10.3 (6.9-14.7)  | 118,000 (76,100-170,000)  | 226.6 (145.6-329.4)    | 1,440 (960-2,030)    | 2.7 (1.8-3.8)    | 30,200 (19,500-43,800)    | 58.3 (37.4-84.9)    |
| Argentina | LRI and thorax infections      | 16,100 (13,700-18,900) | 29.4 (25.1-34.9) | 294,000 (247,000-358,000) | 590.7 (491.8-725)      | 4,080 (3,170-5,170)  | 7.5 (5.8-9.5)    | 73,800 (57,400-94,300)    | 147.5 (114.6-189.8) |
| Argentina | TB                             | 48 (21-118)            | 0.1 (0-0.2)      | 1,650 (734-4,020)         | 3.4 (1.5-8.3)          | 20 (3-66)            | 0 (0-0.1)        | 631 (103-2,140)           | 1.3 (0.2-4.4)       |
| Argentina | Typhoid, paratyphoid, and iNTS | 0 (0-1)                | 0 (0-0)          | 13 (2-32)                 | 0 (0-0.1)              | 0 (0-0)              | 0 (0-0)          | 3 (0-8)                   | 0 (0-0)             |
| Argentina | UTI                            | 3,570 (2,500-4,580)    | 6.4 (4.5-8.2)    | 55,200 (38,800-73,800)    | 102.9 (72.5-138)       | 859 (599-1,140)      | 1.5 (1.1-2.1)    | 13,400 (9,150-18,500)     | 24.9 (17.2-34.7)    |
| Barbados  | All                            | 312 (226-419)          | 67.6 (48.6-91.2) | 6,040 (4,160-8,420)       | 1563.3 (1067.4-2210.7) | 79 (55-109)          | 17 (11.9-23.7)   | 1,520 (1,020-2,160)       | 392.1 (259.7-562.7) |
| Barbados  | Bacterial skin infections      | 35 (22-58)             | 7.4 (4.7-12.1)   | 600 (372-982)             | 136.8 (85.3-221)       | 8 (4-14)             | 1.7 (0.9-2.9)    | 135 (78-229)              | 31.1 (18.2-51.6)    |
| Barbados  | Bone and joint infections      | 1 (0-2)                | 0.2 (0.1-0.5)    | 18 (5-44)                 | 4.2 (1.1-10)           | 0 (0-1)              | 0.1 (0-0.1)      | 5 (1-11)                  | 1.1 (0.3-2.6)       |
| Barbados  | BSI                            | 86 (44-144)            | 19.3 (10.1-31.9) | 1,910 (1,000-3,080)       | 551 (312.4-860.9)      | 22 (11-38)           | 5 (2.6-8.3)      | 488 (257-807)             | 140.5 (78-224.4)    |
| Barbados  | Cardiac infections             | 6 (4-7)                | 1.2 (0.9-1.6)    | 135 (100-179)             | 33.1 (24.7-44)         | 1 (1-2)              | 0.3 (0.2-0.4)    | 35 (25-47)                | 8.5 (6.2-11.5)      |

|          |                                |               |                  |                     |                        |            |                 |                   |                     |
|----------|--------------------------------|---------------|------------------|---------------------|------------------------|------------|-----------------|-------------------|---------------------|
| Barbados | CNS infections                 | 2 (1-3)       | 0.4 (0.3-0.7)    | 56 (36-93)          | 20.6 (13.1-33.5)       | 0 (0-1)    | 0.1 (0.1-0.2)   | 13 (8-22)         | 4.8 (3-8)           |
| Barbados | Diarrhoea                      | 0 (0-0)       | 0 (0-0)          | 5 (2-10)            | 1.6 (0.8-3.2)          | 0 (0-0)    | 0 (0-0)         | 1 (0-1)           | 0.3 (0.1-0.5)       |
| Barbados | Gonorrhoea and chlamydia       |               |                  | 2 (1-5)             | 0.9 (0.4-1.8)          |            |                 | 0 (0-1)           | 0.1 (0-0.2)         |
| Barbados | Intra-abdominal infections     | 40 (25-62)    | 8.4 (5.2-13.1)   | 854 (514-1,350)     | 193.3 (113.9-309.4)    | 10 (6-16)  | 2.1 (1.3-3.4)   | 219 (129-349)     | 49.6 (28.8-80.9)    |
| Barbados | LRI and thorax infections      | 97 (74-128)   | 21.2 (16.1-28)   | 1,700 (1,220-2,350) | 455 (319-635.2)        | 25 (18-34) | 5.5 (3.9-7.5)   | 438 (303-618)     | 115.6 (77-165.5)    |
| Barbados | TB                             | 0 (0-0)       | 0 (0-0)          | 1 (0-3)             | 0.3 (0.1-0.9)          | 0 (0-0)    | 0 (0-0)         | 0 (0-1)           | 0.1 (0-0.4)         |
| Barbados | Typhoid, paratyphoid, and iNTS | 0 (0-0)       | 0 (0-0)          | 1 (0-1)             | 0.2 (0.1-0.4)          | 0 (0-0)    | 0 (0-0)         | 0 (0-0)           | 0 (0-0.1)           |
| Barbados | UTI                            | 45 (32-57)    | 9.3 (6.6-11.8)   | 758 (541-973)       | 166.3 (119.7-214.2)    | 11 (8-14)  | 2.3 (1.6-3)     | 185 (130-245)     | 40.6 (28.5-53.4)    |
| Belize   | All                            | 158 (108-220) | 57.8 (39.8-79.9) | 5,310 (3,630-7,450) | 1616.2 (1108.9-2259.8) | 39 (27-56) | 14.5 (9.8-20.4) | 1,310 (873-1,870) | 399.8 (268.7-567.2) |
| Belize   | Bacterial skin infections      | 6 (3-12)      | 2.4 (1-4.7)      | 152 (70-295)        | 50.3 (22.1-97.3)       | 1 (1-3)    | 0.5 (0.2-1.1)   | 34 (15-67)        | 11.1 (4.6-21.9)     |
| Belize   | Bone and joint infections      | 1 (0-2)       | 0.3 (0.1-0.6)    | 17 (5-42)           | 5.5 (1.5-13.1)         | 0 (0-0)    | 0.1 (0-0.1)     | 4 (1-11)          | 1.4 (0.4-3.4)       |
| Belize   | BSI                            | 49 (28-79)    | 17.8 (9.7-28.9)  | 1,800 (1,100-2,730) | 542.4 (324.3-827.6)    | 13 (7-21)  | 4.6 (2.5-7.6)   | 463 (277-713)     | 139.5 (82.3-216.2)  |
| Belize   | Cardiac infections             | 1 (1-2)       | 0.4 (0.3-0.6)    | 46 (32-64)          | 13 (9.3-18.1)          | 0 (0-0)    | 0.1 (0.1-0.2)   | 12 (8-17)         | 3.4 (2.4-4.8)       |
| Belize   | CNS infections                 | 2 (1-3)       | 0.4 (0.2-0.8)    | 89 (52-159)         | 23 (13.6-41)           | 0 (0-1)    | 0.1 (0.1-0.2)   | 20 (12-37)        | 5.2 (3-9.6)         |
| Belize   | Diarrhoea                      | 0 (0-0)       | 0 (0-0.1)        | 9 (5-15)            | 2.5 (1.4-4.3)          | 0 (0-0)    | 0 (0-0)         | 2 (1-3)           | 0.5 (0.3-0.9)       |
| Belize   | Gonorrhoea and chlamydia       |               |                  | 3 (1-6)             | 0.7 (0.3-1.3)          |            |                 | 0 (0-1)           | 0.1 (0-0.2)         |
| Belize   | Intra-abdominal infections     | 31 (20-46)    | 11.3 (7.2-16.6)  | 924 (554-1,400)     | 288.5 (177.9-429.3)    | 8 (5-12)   | 2.8 (1.8-4.3)   | 232 (136-364)     | 72.4 (43.5-112.7)   |
| Belize   | LRI and thorax infections      | 54 (40-71)    | 19.8 (14.8-26.3) | 1,930 (1,440-2,570) | 578 (431.8-772.6)      | 13 (10-18) | 4.9 (3.5-6.7)   | 459 (329-623)     | 138.9 (99.9-188.1)  |
| Belize   | TB                             | 0 (0-1)       | 0.1 (0-0.3)      | 11 (4-34)           | 3 (1.1-9)              | 0 (0-0)    | 0 (0-0.1)       | 5 (1-19)          | 1.3 (0.2-5.1)       |

|         |                                |                           |                  |                                 |                        |                        |                  |                             |                      |
|---------|--------------------------------|---------------------------|------------------|---------------------------------|------------------------|------------------------|------------------|-----------------------------|----------------------|
| Belize  | Typhoid, paratyphoid, and iNTS | 0 (0-0)                   | 0 (0-0)          | 0 (0-1)                         | 0.1 (0-0.1)            | 0 (0-0)                | 0 (0-0)          | 0 (0-0)                     | 0 (0-0)              |
| Belize  | UTI                            | 13 (10-19)                | 5.3 (3.9-7.3)    | 327 (241-452)                   | 109.3 (80-151.8)       | 3 (2-5)                | 1.3 (0.9-1.8)    | 78 (55-111)                 | 26 (18.3-37.3)       |
| Bolivia | All                            | 10,100 (7,220-13,600)     | 116.9 (83.7-158) | 373,000 (272,000-508,000)       | 3232.9 (2339.8-4406.2) | 2,490 (1,770-3,430)    | 29 (20.4-40.2)   | 90,500 (64,300-123,000)     | 791.2 (562.1-1088.2) |
| Bolivia | Bacterial skin infections      | 141 (44-324)              | 1.9 (0.6-4.2)    | 3,300 (1,250-7,060)             | 36.1 (12.8-79.7)       | 31 (9-72)              | 0.4 (0.1-0.9)    | 709 (255-1,560)             | 7.8 (2.6-17.6)       |
| Bolivia | Bone and joint infections      | 22 (6-51)                 | 0.3 (0.1-0.6)    | 514 (132-1,240)                 | 5.5 (1.4-13.2)         | 5 (1-12)               | 0.1 (0-0.2)      | 120 (30-303)                | 1.3 (0.3-3.2)        |
| Bolivia | BSI                            | 2,430 (1,440-3,770)       | 26 (14.8-41.9)   | 108,000 (69,500-155,000)        | 865.9 (549.8-1281.9)   | 594 (352-941)          | 6.4 (3.6-10.4)   | 26,300 (16,900-38,300)      | 211.3 (131.8-316.3)  |
| Bolivia | Cardiac infections             | 55 (39-75)                | 0.6 (0.4-0.9)    | 1,810 (1,250-2,520)             | 17.1 (12-23.5)         | 13 (9-18)              | 0.2 (0.1-0.2)    | 438 (300-611)               | 4.1 (2.8-5.7)        |
| Bolivia | CNS infections                 | 70 (44-113)               | 0.6 (0.4-1)      | 4,070 (2,560-6,400)             | 31.1 (19.8-49.4)       | 16 (10-26)             | 0.1 (0.1-0.2)    | 906 (562-1,470)             | 6.9 (4.3-11.2)       |
| Bolivia | Diarrhoea                      | 7 (3-14)                  | 0.1 (0-0.1)      | 656 (271-1,350)                 | 4.8 (2-9.6)            | 2 (1-4)                | 0 (0-0)          | 129 (46-295)                | 0.9 (0.3-2.1)        |
| Bolivia | Gonorrhoea and chlamydia       |                           |                  | 69 (29-149)                     | 0.6 (0.2-1.2)          |                        |                  | 7 (1-18)                    | 0.1 (0-0.2)          |
| Bolivia | Intra-abdominal infections     | 1,850 (1,160-2,680)       | 22.3 (14.2-32.1) | 48,000 (29,600-71,900)          | 499.5 (312.2-735.3)    | 456 (286-687)          | 5.5 (3.5-8.3)    | 11,800 (7,030-18,200)       | 123.1 (74.6-187.4)   |
| Bolivia | LRI and thorax infections      | 4,780 (3,570-6,210)       | 56.2 (41.8-72.7) | 187,000 (140,000-240,000)       | 1571.4 (1182.1-2033.6) | 1,150 (814-1,530)      | 13.6 (9.6-18.3)  | 43,600 (31,200-58,000)      | 370.6 (267.2-492.7)  |
| Bolivia | TB                             | 244 (89-615)              | 2.6 (0.9-6.7)    | 9,240 (3,380-23,700)            | 85.5 (31.2-216.1)      | 114 (15-388)           | 1.2 (0.2-4.2)    | 4,050 (533-13,800)          | 37.6 (5-127.9)       |
| Bolivia | Typhoid, paratyphoid, and iNTS | 1 (0-2)                   | 0 (0-0)          | 51 (16-118)                     | 0.4 (0.1-0.9)          | 0 (0-1)                | 0 (0-0)          | 10 (2-28)                   | 0.1 (0-0.2)          |
| Bolivia | UTI                            | 465 (297-712)             | 6.3 (4.1-9.5)    | 10,300 (6,420-16,000)           | 115.1 (72.7-176.7)     | 111 (69-170)           | 1.5 (0.9-2.3)    | 2,460 (1,520-3,870)         | 27.4 (16.9-42.4)     |
| Brazil  | All                            | 138,000 (103,000-182,000) | 63.2 (47.4-82.9) | 3,570,000 (2,630,000-4,810,000) | 1724.4 (1267.8-2306)   | 33,200 (24,200-45,000) | 15.2 (11.2-20.4) | 859,000 (621,000-1,180,000) | 413.5 (299.7-569.1)  |
| Brazil  | Bacterial skin infections      | 4,910 (2,490-8,660)       | 2.2 (1.1-3.9)    | 107,000 (54,800-183,000)        | 47.1 (24.5-80.7)       | 995 (480-1,820)        | 0.4 (0.2-0.8)    | 21,400 (10,300-38,400)      | 9.5 (4.6-16.7)       |

|        |                                |                        |                  |                                 |                     |                       |               |                           |                     |
|--------|--------------------------------|------------------------|------------------|---------------------------------|---------------------|-----------------------|---------------|---------------------------|---------------------|
| Brazil | Bone and joint infections      | 393 (109-927)          | 0.2 (0-0.4)      | 9,320 (2,610-22,300)            | 4.1 (1.2-9.7)       | 87 (24-206)           | 0 (0-0.1)     | 2,060 (564-4,980)         | 0.9 (0.2-2.2)       |
| Brazil | BSI                            | 34,000 (19,000-55,700) | 16 (9.2-25.8)    | 1,080,000 (665,000-1,640,000)   | 558.6 (354-830)     | 8,520 (4,830-13,900)  | 4 (2.3-6.5)   | 269,000 (166,000-411,000) | 139.3 (87.7-210.9)  |
| Brazil | Cardiac infections             | 1,990 (1,490-2,500)    | 0.9 (0.7-1.1)    | 55,700 (43,700-69,500)          | 24.4 (19.2-30.5)    | 498 (373-632)         | 0.2 (0.2-0.3) | 13,900 (10,800-17,700)    | 6.1 (4.7-7.8)       |
| Brazil | CNS infections                 | 785 (565-1,170)        | 0.4 (0.3-0.6)    | 43,200 (31,000-61,000)          | 22.9 (16.2-32.2)    | 176 (125-266)         | 0.1 (0.1-0.1) | 9,580 (6,800-13,800)      | 5.1 (3.5-7.2)       |
| Brazil | Diarrhoea                      | 87 (54-131)            | 0 (0-0.1)        | 8,030 (4,590-13,700)            | 4.7 (2.7-7.9)       | 18 (11-30)            | 0 (0-0)       | 1,410 (787-2,330)         | 0.8 (0.5-1.4)       |
| Brazil | Gonorrhoea and chlamydia       |                        |                  | 1,230 (699-1,910)               | 0.5 (0.3-0.8)       |                       |               | 120 (31-242)              | 0.1 (0-0.1)         |
| Brazil | Intra-abdominal infections     | 25,200 (17,100-35,600) | 10.9 (7.5-15.4)  | 628,000 (413,000-909,000)       | 268.4 (176.8-390.5) | 6,390 (4,310-8,950)   | 2.8 (1.9-3.9) | 159,000 (104,000-231,000) | 68 (44.3-98.3)      |
| Brazil | LRI and thorax infections      | 53,500 (43,500-67,100) | 24.8 (20.2-31.1) | 1,320,000 (1,050,000-1,680,000) | 649.4 (509-826.6)   | 12,500 (9,480-16,100) | 5.8 (4.4-7.4) | 303,000 (228,000-394,000) | 148.7 (111.3-194.3) |
| Brazil | TB                             | 596 (264-1,270)        | 0.3 (0.1-0.5)    | 22,200 (10,100-46,600)          | 9.4 (4.3-19.8)      | 260 (41-799)          | 0.1 (0-0.3)   | 8,820 (1,420-26,900)      | 3.7 (0.6-11.5)      |
| Brazil | Typhoid, paratyphoid, and iNTS | 7 (3-13)               | 0 (0-0)          | 343 (132-717)                   | 0.2 (0.1-0.4)       | 1 (0-3)               | 0 (0-0)       | 70 (17-170)               | 0 (0-0.1)           |
| Brazil | UTI                            | 16,500 (12,000-20,200) | 7.5 (5.5-9.2)    | 303,000 (230,000-382,000)       | 134.7 (102.7-169.8) | 3,820 (2,790-4,880)   | 1.7 (1.3-2.2) | 70,400 (52,300-92,000)    | 31.3 (23.3-40.6)    |
| Canada | All                            | 12,900 (8,830-18,100)  | 18.3 (12.3-25.9) | 229,000 (151,000-328,000)       | 395.6 (256.2-576.5) | 2,890 (1,960-4,180)   | 4.1 (2.7-6)   | 51,000 (33,100-75,800)    | 88 (55.4-132.9)     |
| Canada | Bacterial skin infections      | 357 (158-721)          | 0.5 (0.2-1)      | 6,140 (2,730-12,700)            | 10.2 (4.6-21)       | 69 (28-149)           | 0.1 (0-0.2)   | 1,170 (489-2,520)         | 1.9 (0.8-4.2)       |
| Canada | Bone and joint infections      | 52 (17-118)            | 0.1 (0-0.2)      | 961 (308-2,150)                 | 1.6 (0.5-3.6)       | 11 (3-26)             | 0 (0-0)       | 195 (61-466)              | 0.3 (0.1-0.8)       |
| Canada | BSI                            | 4,660 (2,480-7,840)    | 6.9 (3.7-11.5)   | 93,300 (50,300-152,000)         | 171.6 (92.2-279.1)  | 1,060 (550-1,810)     | 1.6 (0.8-2.7) | 21,200 (11,300-35,600)    | 38.8 (20.9-64.4)    |
| Canada | Cardiac infections             | 456 (268-646)          | 0.6 (0.4-0.9)    | 8,170 (4,980-11,700)            | 13.7 (8.4-19.7)     | 104 (60-151)          | 0.1 (0.1-0.2) | 1,830 (1,100-2,690)       | 3.1 (1.8-4.5)       |
| Canada | CNS infections                 | 35 (21-67)             | 0.1 (0-0.1)      | 1,250 (764-2,200)               | 3.6 (2.3-5.9)       | 7 (4-13)              | 0 (0-0)       | 229 (134-412)             | 0.7 (0.4-1.1)       |
| Canada | Diarrhoea                      | 19 (10-32)             | 0 (0-0)          | 765 (384-1,350)                 | 1.9 (1-3.4)         | 4 (2-7)               | 0 (0-0)       | 120 (63-200)              | 0.3 (0.1-0.5)       |

|        |                                |                       |                  |                           |                     |                     |                 |                        |                     |
|--------|--------------------------------|-----------------------|------------------|---------------------------|---------------------|---------------------|-----------------|------------------------|---------------------|
| Canada | Gonorrhoea and chlamydia       |                       |                  | 58 (32-100)               | 0.2 (0.1-0.3)       |                     |                 | 6 (2-12)               | 0 (0-0)             |
| Canada | Intra-abdominal infections     | 3,020 (1,930-4,480)   | 4.3 (2.7-6.4)    | 57,100 (35,900-84,400)    | 95.3 (58.9-144.5)   | 701 (446-1,040)     | 1 (0.6-1.5)     | 13,300 (8,340-19,800)  | 22.2 (13.7-33.4)    |
| Canada | LRI and thorax infections      | 2,990 (2,320-3,830)   | 4 (3.1-5.2)      | 42,600 (31,600-58,000)    | 70 (51.4-96.5)      | 640 (460-880)       | 0.8 (0.6-1.2)   | 9,110 (6,320-13,000)   | 14.9 (10.3-21.3)    |
| Canada | TB                             | 15 (10-24)            | 0 (0-0)          | 312 (205-468)             | 0.5 (0.4-0.8)       | 5 (0-11)            | 0 (0-0)         | 79 (9-193)             | 0.1 (0-0.3)         |
| Canada | Typhoid, paratyphoid, and iNTS | 0 (0-0)               | 0 (0-0)          | 4 (1-8)                   | 0 (0-0)             | 0 (0-0)             | 0 (0-0)         | 1 (0-2)                | 0 (0-0)             |
| Canada | UTI                            | 1,330 (1,040-1,720)   | 1.7 (1.3-2.2)    | 18,000 (13,500-24,500)    | 27 (20-37.3)        | 284 (216-378)       | 0.4 (0.3-0.5)   | 3,840 (2,790-5,410)    | 5.8 (4.1-8.2)       |
| Chile  | All                            | 10,200 (7,360-13,700) | 43.7 (31.6-59.1) | 201,000 (138,000-282,000) | 930.9 (630.6-1312)  | 2,720 (1,930-3,770) | 11.7 (8.3-16.2) | 53,800 (36,700-77,100) | 247.6 (167.4-357.6) |
| Chile  | Bacterial skin infections      | 273 (140-500)         | 1.2 (0.6-2.1)    | 4,700 (2,390-9,090)       | 20.5 (10.5-39.4)    | 66 (32-125)         | 0.3 (0.1-0.5)   | 1,130 (540-2,220)      | 4.9 (2.4-9.7)       |
| Chile  | Bone and joint infections      | 26 (8-62)             | 0.1 (0-0.3)      | 568 (167-1,320)           | 2.5 (0.7-5.8)       | 7 (2-17)            | 0 (0-0.1)       | 151 (45-363)           | 0.7 (0.2-1.6)       |
| Chile  | BSI                            | 2,810 (1,510-4,700)   | 12.2 (6.6-20.4)  | 62,800 (34,500-101,000)   | 305.9 (169.8-485.6) | 766 (398-1,300)     | 3.3 (1.7-5.6)   | 17,000 (9,330-27,900)  | 82.8 (45.5-135.6)   |
| Chile  | Cardiac infections             | 218 (154-311)         | 0.9 (0.7-1.3)    | 4,730 (3,460-6,620)       | 20.8 (15.2-29.3)    | 60 (41-87)          | 0.3 (0.2-0.4)   | 1,290 (908-1,850)      | 5.6 (4-8.1)         |
| Chile  | CNS infections                 | 52 (37-79)            | 0.3 (0.2-0.4)    | 2,100 (1,530-3,070)       | 11.9 (8.5-17.4)     | 12 (9-19)           | 0.1 (0-0.1)     | 488 (344-734)          | 2.8 (1.9-4.1)       |
| Chile  | Diarrhoea                      | 8 (4-13)              | 0 (0-0.1)        | 381 (218-616)             | 2.2 (1.2-3.6)       | 2 (1-3)             | 0 (0-0)         | 72 (37-123)            | 0.4 (0.2-0.7)       |
| Chile  | Gonorrhoea and chlamydia       |                       |                  | 82 (43-168)               | 0.4 (0.2-0.9)       |                     |                 | 8 (2-19)               | 0 (0-0.1)           |
| Chile  | Intra-abdominal infections     | 2,640 (1,770-3,790)   | 11.1 (7.4-16)    | 58,800 (38,100-84,000)    | 253.4 (163.4-364.3) | 718 (468-1,030)     | 3 (2-4.4)       | 16,000 (10,100-23,400) | 69.1 (43.1-101.2)   |
| Chile  | LRI and thorax infections      | 2,840 (2,230-3,660)   | 12.4 (9.7-16)    | 47,500 (35,900-64,300)    | 228.3 (169.8-310.3) | 756 (546-1,020)     | 3.3 (2.4-4.4)   | 12,500 (8,850-17,500)  | 59.6 (42-83.1)      |
| Chile  | TB                             | 33 (21-54)            | 0.1 (0.1-0.2)    | 814 (537-1,360)           | 3.6 (2.4-6)         | 12 (3-30)           | 0.1 (0-0.1)     | 276 (82-671)           | 1.2 (0.4-3)         |
| Chile  | Typhoid, paratyphoid, and iNTS | 1 (0-2)               | 0 (0-0)          | 15 (2-51)                 | 0.1 (0-0.2)         | 0 (0-0)             | 0 (0-0)         | 3 (0-11)               | 0 (0-0)             |

|            |                                |                        |                  |                           |                      |                     |               |                          |                     |
|------------|--------------------------------|------------------------|------------------|---------------------------|----------------------|---------------------|---------------|--------------------------|---------------------|
| Chile      | UTI                            | 1,260 (995-1,570)      | 5.3 (4.2-6.6)    | 19,000 (14,800-24,700)    | 81.2 (63.4-105.8)    | 318 (244-413)       | 1.3 (1-1.7)   | 4,790 (3,650-6,460)      | 20.5 (15.5-27.8)    |
| Colombia   | All                            | 18,200 (11,800-26,500) | 34.6 (22.4-50.6) | 475,000 (301,000-711,000) | 999.8 (634.5-1494.8) | 4,720 (3,020-7,060) | 9 (5.8-13.5)  | 123,000 (76,500-186,000) | 258 (161.2-390.4)   |
| Colombia   | Bacterial skin infections      | 710 (371-1,320)        | 1.3 (0.7-2.4)    | 14,900 (7,790-27,800)     | 29 (15.3-54.5)       | 167 (80-317)        | 0.3 (0.1-0.6) | 3,510 (1,720-6,580)      | 6.8 (3.4-12.8)      |
| Colombia   | Bone and joint infections      | 53 (16-122)            | 0.1 (0-0.2)      | 1,340 (399-3,170)         | 2.7 (0.8-6.3)        | 14 (4-32)           | 0 (0-0.1)     | 344 (100-822)            | 0.7 (0.2-1.6)       |
| Colombia   | BSI                            | 5,890 (3,020-9,990)    | 11.5 (6-19.3)    | 179,000 (99,100-284,000)  | 388.5 (219.1-611.2)  | 1,550 (775-2,640)   | 3 (1.6-5.1)   | 46,700 (25,800-77,400)   | 101.6 (56.8-166)    |
| Colombia   | Cardiac infections             | 386 (235-556)          | 0.7 (0.4-1.1)    | 10,400 (6,460-14,900)     | 20.5 (12.9-29.4)     | 101 (60-147)        | 0.2 (0.1-0.3) | 2,710 (1,650-3,910)      | 5.4 (3.3-7.8)       |
| Colombia   | CNS infections                 | 144 (94-223)           | 0.3 (0.2-0.5)    | 7,090 (4,510-10,800)      | 15.9 (10-24)         | 35 (22-55)          | 0.1 (0-0.1)   | 1,690 (1,060-2,650)      | 3.8 (2.4-5.9)       |
| Colombia   | Diarrhoea                      | 22 (12-37)             | 0 (0-0.1)        | 1,460 (781-2,410)         | 3.4 (1.8-5.7)        | 5 (2-9)             | 0 (0-0)       | 269 (113-489)            | 0.6 (0.3-1.2)       |
| Colombia   | Gonorrhoea and chlamydia       |                        |                  | 99 (38-219)               | 0.2 (0.1-0.4)        |                     |               | 10 (2-24)                | 0 (0-0)             |
| Colombia   | Intra-abdominal infections     | 3,780 (2,420-5,660)    | 7.1 (4.5-10.6)   | 83,200 (50,300-129,000)   | 162.4 (98.3-254.3)   | 970 (603-1,490)     | 1.8 (1.1-2.8) | 21,400 (12,700-33,900)   | 41.8 (24.6-66.6)    |
| Colombia   | LRI and thorax infections      | 5,210 (3,480-7,560)    | 10 (6.7-14.4)    | 141,000 (94,100-203,000)  | 305 (202.9-440.4)    | 1,380 (874-2,030)   | 2.6 (1.7-3.9) | 36,300 (23,500-54,700)   | 78.3 (50.6-117.4)   |
| Colombia   | TB                             | 121 (44-309)           | 0.2 (0.1-0.6)    | 3,900 (1,430-9,870)       | 7.7 (2.8-19.5)       | 59 (8-190)          | 0.1 (0-0.4)   | 1,700 (242-5,340)        | 3.4 (0.5-10.5)      |
| Colombia   | Typhoid, paratyphoid, and iNTS | 2 (1-5)                | 0 (0-0)          | 70 (20-179)               | 0.1 (0-0.4)          | 0 (0-1)             | 0 (0-0)       | 14 (2-41)                | 0 (0-0.1)           |
| Colombia   | UTI                            | 1,840 (1,320-2,540)    | 3.3 (2.4-4.6)    | 33,300 (23,200-47,700)    | 64.3 (44.8-92.2)     | 446 (306-629)       | 0.8 (0.6-1.1) | 8,070 (5,430-11,700)     | 15.6 (10.5-22.7)    |
| Costa Rica | All                            | 1,890 (1,210-2,800)    | 37.3 (23.8-55.3) | 44,000 (27,100-67,400)    | 908.9 (557.9-1403.7) | 484 (304-731)       | 9.5 (6-14.4)  | 11,200 (6,820-17,500)    | 230.8 (140.7-360.5) |
| Costa Rica | Bacterial skin infections      | 61 (28-122)            | 1.2 (0.5-2.4)    | 1,290 (587-2,580)         | 25.5 (11.8-51)       | 14 (6-27)           | 0.3 (0.1-0.5) | 285 (125-587)            | 5.6 (2.5-11.6)      |
| Costa Rica | Bone and joint infections      | 7 (2-17)               | 0.1 (0-0.3)      | 163 (45-394)              | 3.2 (0.9-7.7)        | 2 (0-4)             | 0 (0-0.1)     | 42 (11-105)              | 0.8 (0.2-2.1)       |
| Costa Rica | BSI                            | 617 (311-1,040)        | 12.3 (6.2-20.6)  | 15,500 (7,940-25,500)     | 324.8 (169.5-536.5)  | 160 (81-280)        | 3.2 (1.6-5.5) | 3,990 (2,040-6,900)      | 83.7 (43.6-144)     |

|            |                                |                      |                  |                          |                      |                     |                |                        |                     |
|------------|--------------------------------|----------------------|------------------|--------------------------|----------------------|---------------------|----------------|------------------------|---------------------|
| Costa Rica | Cardiac infections             | 52 (31-77)           | 1 (0.6-1.5)      | 1,330 (792-1,980)        | 26.1 (15.6-38.6)     | 14 (8-21)           | 0.3 (0.2-0.4)  | 344 (205-522)          | 6.7 (4-10.3)        |
| Costa Rica | CNS infections                 | 15 (10-23)           | 0.3 (0.2-0.5)    | 622 (410-967)            | 13.9 (9-21.6)        | 3 (2-5)             | 0.1 (0-0.1)    | 139 (87-219)           | 3.1 (1.9-4.9)       |
| Costa Rica | Diarrhoea                      | 2 (1-3)              | 0 (0-0.1)        | 77 (40-135)              | 1.8 (0.9-3.2)        | 0 (0-1)             | 0 (0-0)        | 13 (6-25)              | 0.3 (0.1-0.6)       |
| Costa Rica | Gonorrhoea and chlamydia       |                      |                  | 17 (7-34)                | 0.3 (0.1-0.7)        |                     |                | 2 (0-4)                | 0 (0-0.1)           |
| Costa Rica | Intra-abdominal infections     | 512 (315-772)        | 10 (6.2-15.1)    | 11,600 (6,940-17,900)    | 226.6 (135.4-353.2)  | 128 (79-198)        | 2.5 (1.5-3.9)  | 2,930 (1,720-4,660)    | 57.1 (33.4-91.1)    |
| Costa Rica | LRI and thorax infections      | 481 (322-700)        | 9.5 (6.3-13.9)   | 10,800 (7,050-15,800)    | 233.8 (151.4-345.2)  | 129 (79-195)        | 2.5 (1.6-3.9)  | 2,820 (1,740-4,320)    | 60.7 (37-92.6)      |
| Costa Rica | TB                             | 3 (1-10)             | 0.1 (0-0.2)      | 106 (40-289)             | 2.1 (0.8-5.7)        | 2 (0-6)             | 0 (0-0.1)      | 44 (6-155)             | 0.8 (0.1-3)         |
| Costa Rica | Typhoid, paratyphoid, and iNTS | 0 (0-0)              | 0 (0-0)          | 0 (0-0)                  | 0 (0-0)              | 0 (0-0)             | 0 (0-0)        | 0 (0-0)                | 0 (0-0)             |
| Costa Rica | UTI                            | 141 (96-199)         | 2.7 (1.9-3.8)    | 2,570 (1,730-3,720)      | 50.7 (34-73.3)       | 33 (22-47)          | 0.6 (0.4-0.9)  | 600 (390-881)          | 11.8 (7.7-17.3)     |
| Cuba       | All                            | 6,830 (4,700-10,000) | 35.9 (24.6-52.9) | 135,000 (89,700-202,000) | 837.9 (555.4-1245.4) | 1,680 (1,120-2,520) | 8.8 (5.8-13.3) | 33,200 (21,600-50,800) | 204.9 (132.9-312.3) |
| Cuba       | Bacterial skin infections      | 270 (119-542)        | 1.4 (0.6-2.7)    | 5,020 (2,430-9,860)      | 30.2 (15.3-56.8)     | 55 (22-118)         | 0.3 (0.1-0.6)  | 1,020 (441-2,040)      | 6.1 (2.9-11.8)      |
| Cuba       | Bone and joint infections      | 30 (9-73)            | 0.2 (0-0.4)      | 531 (151-1,300)          | 3 (0.8-7.3)          | 7 (2-17)            | 0 (0-0.1)      | 119 (32-307)           | 0.7 (0.2-1.7)       |
| Cuba       | BSI                            | 2,210 (1,160-3,950)  | 12 (6.4-21.1)    | 46,900 (25,100-82,000)   | 305.6 (166.8-524)    | 585 (297-1,050)     | 3.2 (1.6-5.6)  | 12,300 (6,410-21,500)  | 79.9 (42.6-136.7)   |
| Cuba       | Cardiac infections             | 86 (58-122)          | 0.5 (0.3-0.7)    | 2,140 (1,460-3,070)      | 13.6 (9.3-19.5)      | 23 (15-33)          | 0.1 (0.1-0.2)  | 559 (376-810)          | 3.6 (2.4-5.1)       |
| Cuba       | CNS infections                 | 45 (30-72)           | 0.3 (0.2-0.5)    | 1,620 (1,100-2,490)      | 15.2 (10.4-22.1)     | 10 (6-16)           | 0.1 (0-0.1)    | 350 (229-549)          | 3.3 (2.2-5)         |
| Cuba       | Diarrhoea                      | 2 (1-4)              | 0 (0-0)          | 179 (100-302)            | 1.4 (0.8-2.4)        | 1 (0-1)             | 0 (0-0)        | 32 (16-57)             | 0.3 (0.1-0.5)       |
| Cuba       | Gonorrhoea and chlamydia       |                      |                  | 74 (36-146)              | 0.7 (0.3-1.4)        |                     |                | 7 (2-16)               | 0.1 (0-0.2)         |
| Cuba       | Intra-abdominal infections     | 1,340 (865-2,010)    | 7.1 (4.6-10.7)   | 29,700 (18,800-45,200)   | 171.6 (107.2-263.6)  | 334 (210-515)       | 1.8 (1.1-2.7)  | 7,410 (4,570-11,600)   | 42.8 (26-67.4)      |



|                    |                                |                     |                  |                           |                        |                   |                  |                        |                     |
|--------------------|--------------------------------|---------------------|------------------|---------------------------|------------------------|-------------------|------------------|------------------------|---------------------|
| Cuba               | LRI and thorax infections      | 2,480 (1,900-3,250) | 12.6 (9.6-16.7)  | 41,500 (30,800-56,600)    | 255.3 (189.5-347.1)    | 573 (417-785)     | 2.9 (2.1-4)      | 9,580 (6,770-13,500)   | 58.3 (41-81.3)      |
| Cuba               | TB                             | 4 (1-8)             | 0 (0-0)          | 116 (51-264)              | 0.8 (0.3-1.7)          | 2 (0-5)           | 0 (0-0)          | 38 (7-116)             | 0.2 (0-0.7)         |
| Cuba               | Typhoid, paratyphoid, and iNTS | 0 (0-1)             | 0 (0-0)          | 5 (1-16)                  | 0 (0-0.1)              | 0 (0-0)           | 0 (0-0)          | 1 (0-3)                | 0 (0-0)             |
| Cuba               | UTI                            | 369 (229-570)       | 1.9 (1.2-2.9)    | 7,060 (4,420-10,800)      | 40.5 (25.3-61.5)       | 90 (55-143)       | 0.5 (0.3-0.7)    | 1,720 (1,060-2,690)    | 9.8 (6-15.2)        |
| Dominica           | All                            | 60 (39-86)          | 72 (46.5-103.5)  | 1,420 (894-2,100)         | 2061.8 (1299.6-3076.8) | 16 (10-23)        | 18.4 (11.7-27.1) | 359 (224-533)          | 517.9 (324.6-777.9) |
| Dominica           | Bacterial skin infections      | 5 (3-8)             | 5.7 (3.5-9.3)    | 91 (56-147)               | 109.8 (68.6-173.9)     | 1 (1-2)           | 1.3 (0.8-2.2)    | 21 (12-36)             | 26 (15.4-42.9)      |
| Dominica           | Bone and joint infections      | 0 (0-1)             | 0.2 (0.1-0.6)    | 4 (1-10)                  | 5 (1.3-12.5)           | 0 (0-0)           | 0.1 (0-0.2)      | 1 (0-3)                | 1.3 (0.3-3.4)       |
| Dominica           | BSI                            | 21 (11-36)          | 26.3 (14.1-43)   | 550 (304-870)             | 852.8 (493-1318.8)     | 6 (3-9)           | 6.9 (3.7-11.2)   | 143 (79-230)           | 220.4 (127.1-346.5) |
| Dominica           | Cardiac infections             | 1 (1-2)             | 1.3 (1-1.8)      | 27 (19-37)                | 32.9 (23.7-45.3)       | 0 (0-0)           | 0.3 (0.2-0.5)    | 7 (5-10)               | 8.6 (6.1-11.9)      |
| Dominica           | CNS infections                 | 0 (0-1)             | 0.7 (0.4-1.3)    | 24 (14-42)                | 43.1 (24.6-73.9)       | 0 (0-0)           | 0.2 (0.1-0.3)    | 5 (3-10)               | 9.8 (5.5-17.1)      |
| Dominica           | Diarrhoea                      | 0 (0-0)             | 0 (0-0)          | 1 (0-2)                   | 1.7 (0.9-3.1)          | 0 (0-0)           | 0 (0-0)          | 0 (0-0)                | 0.4 (0.2-0.7)       |
| Dominica           | Gonorrhoea and chlamydia       |                     |                  | 1 (0-2)                   | 1.1 (0.4-2.6)          |                   |                  | 0 (0-0)                | 0.1 (0-0.3)         |
| Dominica           | Intra-abdominal infections     | 9 (6-15)            | 10.7 (6.6-16.9)  | 209 (124-336)             | 251.4 (146.3-410.5)    | 2 (1-4)           | 2.7 (1.6-4.4)    | 53 (30-88)             | 64.1 (36.2-106.4)   |
| Dominica           | LRI and thorax infections      | 19 (12-27)          | 22.7 (15.2-32.9) | 442 (286-648)             | 681.6 (438.3-997.9)    | 5 (3-7)           | 5.8 (3.7-8.7)    | 110 (69-165)           | 166.3 (104.1-247.2) |
| Dominica           | TB                             | 0 (0-0)             | 0.1 (0-0.3)      | 2 (0-8)                   | 2.5 (0.7-9.9)          | 0 (0-0)           | 0 (0-0.2)        | 1 (0-4)                | 1.2 (0.1-5.8)       |
| Dominica           | Typhoid, paratyphoid, and iNTS | 0 (0-0)             | 0 (0-0)          | 0 (0-1)                   | 0.4 (0.1-0.9)          | 0 (0-0)           | 0 (0-0)          | 0 (0-0)                | 0.1 (0-0.2)         |
| Dominica           | UTI                            | 4 (2-6)             | 4.1 (2.3-6.8)    | 68 (38-112)               | 79.4 (44.6-131.5)      | 1 (1-2)           | 1 (0.6-1.7)      | 17 (9-28)              | 19.5 (10.7-32.8)    |
| Dominican Republic | All                            | 5,500 (3,440-8,270) | 59.4 (37.4-89.4) | 209,000 (133,000-311,000) | 2032.6 (1293.7-3032.2) | 1,390 (870-2,090) | 15 (9.4-22.6)    | 51,900 (32,700-78,000) | 505.2 (317.4-757.6) |

|                    |                                |                      |                  |                           |                        |                     |                  |                        |                     |
|--------------------|--------------------------------|----------------------|------------------|---------------------------|------------------------|---------------------|------------------|------------------------|---------------------|
| Dominican Republic | Bacterial skin infections      | 174 (49-398)         | 2 (0.6-4.5)      | 4,010 (1,270-8,990)       | 41.8 (13-93.3)         | 40 (11-92)          | 0.5 (0.1-1)      | 924 (278-2,140)        | 9.6 (2.8-21.8)      |
| Dominican Republic | Bone and joint infections      | 20 (6-47)            | 0.2 (0.1-0.5)    | 442 (116-1,100)           | 4.6 (1.2-11.4)         | 5 (1-13)            | 0.1 (0-0.1)      | 113 (30-296)           | 1.2 (0.3-3.1)       |
| Dominican Republic | BSI                            | 1,990 (1,150-3,110)  | 21.1 (12-33.5)   | 86,800 (54,900-127,000)   | 832.8 (530.2-1226.7)   | 501 (290-796)       | 5.3 (3-8.6)      | 21,700 (13,700-32,600) | 208.2 (131-313)     |
| Dominican Republic | Cardiac infections             | 58 (40-81)           | 0.6 (0.4-0.9)    | 1,950 (1,300-2,770)       | 18.7 (12.5-26.5)       | 15 (10-20)          | 0.2 (0.1-0.2)    | 489 (332-698)          | 4.7 (3.2-6.7)       |
| Dominican Republic | CNS infections                 | 96 (62-148)          | 0.9 (0.6-1.5)    | 5,620 (3,450-8,700)       | 52.1 (32.1-80.5)       | 22 (14-35)          | 0.2 (0.1-0.3)    | 1,310 (792-2,080)      | 12.1 (7.4-19.3)     |
| Dominican Republic | Diarrhoea                      | 6 (3-12)             | 0.1 (0-0.1)      | 525 (223-1,050)           | 4.9 (2.1-9.6)          | 2 (1-3)             | 0 (0-0)          | 115 (45-242)           | 1.1 (0.4-2.2)       |
| Dominican Republic | Gonorrhoea and chlamydia       |                      |                  | 136 (43-402)              | 1.2 (0.4-3.3)          |                     |                  | 14 (2-43)              | 0.1 (0-0.4)         |
| Dominican Republic | Intra-abdominal infections     | 1,170 (697-1,880)    | 12.8 (7.7-20.4)  | 32,700 (18,500-53,600)    | 330.2 (188.4-537.8)    | 297 (170-476)       | 3.2 (1.9-5.1)    | 8,330 (4,630-13,700)   | 84 (47.2-137)       |
| Dominican Republic | LRI and thorax infections      | 1,850 (1,190-2,700)  | 20.1 (13-29.4)   | 72,800 (45,300-109,000)   | 704.3 (442.8-1052.9)   | 467 (296-688)       | 5.1 (3.3-7.5)    | 17,800 (10,800-27,200) | 173.2 (105.8-262.4) |
| Dominican Republic | TB                             | 29 (14-70)           | 0.3 (0.1-0.7)    | 1,280 (634-3,030)         | 11.7 (5.8-27.7)        | 10 (2-35)           | 0.1 (0-0.3)      | 416 (79-1,440)         | 3.8 (0.7-13.2)      |
| Dominican Republic | Typhoid, paratyphoid, and iNTS | 2 (1-4)              | 0 (0-0)          | 82 (28-192)               | 0.8 (0.3-1.8)          | 0 (0-1)             | 0 (0-0)          | 16 (3-44)              | 0.1 (0-0.4)         |
| Dominican Republic | UTI                            | 114 (68-185)         | 1.3 (0.8-2.1)    | 2,830 (1,710-4,480)       | 29.3 (17.8-46.6)       | 28 (16-46)          | 0.3 (0.2-0.5)    | 675 (397-1,110)        | 7 (4.1-11.6)        |
| Ecuador            | All                            | 9,290 (6,430-13,100) | 66.9 (46.4-94.1) | 272,000 (187,000-382,000) | 1716.6 (1186.6-2388.9) | 2,410 (1,620-3,440) | 17.3 (11.7-24.6) | 69,800 (47,200-99,700) | 440.2 (298-625.8)   |
| Ecuador            | Bacterial skin infections      | 187 (65-406)         | 1.4 (0.5-2.9)    | 4,160 (1,650-8,890)       | 27.2 (10.7-58)         | 42 (14-94)          | 0.3 (0.1-0.7)    | 921 (344-1,980)        | 6 (2.3-12.9)        |
| Ecuador            | Bone and joint infections      | 27 (7-62)            | 0.2 (0.1-0.4)    | 633 (174-1,520)           | 4.1 (1.1-9.6)          | 7 (2-16)            | 0 (0-0.1)        | 156 (42-383)           | 1 (0.3-2.5)         |

|             |                                |                     |                  |                          |                     |                 |                 |                        |                     |
|-------------|--------------------------------|---------------------|------------------|--------------------------|---------------------|-----------------|-----------------|------------------------|---------------------|
| Ecuador     | BSI                            | 2,670 (1,460-4,370) | 18.7 (10-31.1)   | 87,200 (52,700-135,000)  | 543.2 (325.5-845.9) | 695 (380-1,130) | 4.9 (2.6-8)     | 22,500 (13,500-35,400) | 140.5 (83.2-220.5)  |
| Ecuador     | Cardiac infections             | 65 (48-89)          | 0.4 (0.3-0.6)    | 2,100 (1,540-2,920)      | 12.7 (9.3-17.4)     | 17 (12-24)      | 0.1 (0.1-0.2)   | 542 (384-762)          | 3.3 (2.3-4.6)       |
| Ecuador     | CNS infections                 | 67 (42-116)         | 0.4 (0.3-0.7)    | 3,460 (2,170-5,830)      | 20.1 (12.7-34.1)    | 16 (10-29)      | 0.1 (0.1-0.2)   | 841 (512-1,430)        | 4.9 (3-8.4)         |
| Ecuador     | Diarrhoea                      | 3 (1-6)             | 0 (0-0)          | 259 (118-518)            | 1.6 (0.7-3.1)       | 1 (0-1)         | 0 (0-0)         | 50 (24-96)             | 0.3 (0.1-0.6)       |
| Ecuador     | Gonorrhoea and chlamydia       |                     |                  | 74 (38-134)              | 0.4 (0.2-0.7)       |                 |                 | 7 (2-16)               | 0 (0-0.1)           |
| Ecuador     | Intra-abdominal infections     | 2,180 (1,400-3,180) | 15.3 (9.9-22.3)  | 51,400 (31,500-77,600)   | 330.7 (204.1-495.3) | 564 (349-849)   | 4 (2.5-6)       | 13,300 (7,940-20,500)  | 85.7 (51.4-131.8)   |
| Ecuador     | LRI and thorax infections      | 3,490 (2,640-4,590) | 25.9 (19.7-33.9) | 108,000 (79,600-144,000) | 680.9 (502.9-903.9) | 886 (637-1,210) | 6.6 (4.8-9)     | 26,900 (19,000-36,400) | 169.8 (120.8-229)   |
| Ecuador     | TB                             | 128 (48-322)        | 0.8 (0.3-2.1)    | 4,820 (1,850-11,900)     | 28.4 (10.9-70.3)    | 59 (9-188)      | 0.4 (0.1-1.2)   | 2,050 (317-6,340)      | 12.1 (1.9-37.6)     |
| Ecuador     | Typhoid, paratyphoid, and iNTS | 1 (0-2)             | 0 (0-0)          | 54 (19-114)              | 0.3 (0.1-0.6)       | 0 (0-0)         | 0 (0-0)         | 11 (2-28)              | 0.1 (0-0.2)         |
| Ecuador     | UTI                            | 479 (305-752)       | 3.7 (2.3-5.7)    | 10,100 (6,360-16,000)    | 67 (42.9-105.3)     | 120 (75-193)    | 0.9 (0.6-1.5)   | 2,480 (1,530-4,070)    | 16.5 (10.2-26.9)    |
| El Salvador | All                            | 3,390 (2,210-4,930) | 54.5 (35.3-79.6) | 85,400 (53,600-129,000)  | 1439.8 (900.2-2177) | 857 (546-1,290) | 13.8 (8.7-20.8) | 21,400 (13,200-33,100) | 360.5 (221.7-558.1) |
| El Salvador | Bacterial skin infections      | 100 (45-204)        | 1.6 (0.7-3.3)    | 2,120 (933-4,330)        | 35.2 (15.3-72.3)    | 23 (10-48)      | 0.4 (0.2-0.8)   | 484 (203-1,020)        | 8 (3.3-17.1)        |
| El Salvador | Bone and joint infections      | 12 (3-29)           | 0.2 (0.1-0.5)    | 266 (66-668)             | 4.4 (1.1-11.2)      | 3 (1-8)         | 0 (0-0.1)       | 66 (17-175)            | 1.1 (0.3-2.9)       |
| El Salvador | BSI                            | 995 (496-1,650)     | 16.3 (8.2-27)    | 27,800 (15,000-45,400)   | 474 (258-770.7)     | 253 (129-433)   | 4.1 (2.1-7)     | 7,030 (3,800-11,800)   | 119.7 (65.1-199.6)  |
| El Salvador | Cardiac infections             | 18 (11-28)          | 0.3 (0.2-0.5)    | 543 (341-856)            | 9 (5.7-14.2)        | 5 (3-7)         | 0.1 (0-0.1)     | 137 (86-212)           | 2.3 (1.4-3.5)       |
| El Salvador | CNS infections                 | 21 (14-34)          | 0.4 (0.2-0.6)    | 872 (549-1,380)          | 14.5 (9.1-23.2)     | 5 (3-8)         | 0.1 (0.1-0.1)   | 202 (124-321)          | 3.4 (2-5.4)         |
| El Salvador | Diarrhoea                      | 4 (2-8)             | 0.1 (0-0.1)      | 230 (105-454)            | 3.9 (1.8-7.8)       | 1 (0-2)         | 0 (0-0)         | 49 (22-94)             | 0.8 (0.4-1.6)       |
| El Salvador | Gonorrhoea and chlamydia       |                     |                  | 15 (6-28)                | 0.2 (0.1-0.4)       |                 |                 | 1 (0-3)                | 0 (0-0.1)           |

|             |                                |                   |                   |                        |                        |               |                |                      |                     |
|-------------|--------------------------------|-------------------|-------------------|------------------------|------------------------|---------------|----------------|----------------------|---------------------|
| El Salvador | Intra-abdominal infections     | 686 (404-1,080)   | 11.3 (6.7-17.7)   | 17,000 (9,490-27,300)  | 285.7 (159.8-459.1)    | 172 (100-274) | 2.8 (1.6-4.5)  | 4,280 (2,380-7,030)  | 72 (39.9-118)       |
| El Salvador | LRI and thorax infections      | 1,280 (914-1,730) | 20.1 (14.2-27.5)  | 30,700 (20,800-43,600) | 516.9 (347.8-737.4)    | 328 (222-462) | 5.1 (3.5-7.3)  | 7,700 (5,040-11,200) | 129.4 (84.2-188.2)  |
| El Salvador | TB                             | 7 (3-19)          | 0.1 (0-0.3)       | 245 (91-627)           | 4 (1.5-10.3)           | 3 (0-11)      | 0.1 (0-0.2)    | 90 (12-316)          | 1.5 (0.2-5.2)       |
| El Salvador | Typhoid, paratyphoid, and iNTS | 0 (0-0)           | 0 (0-0)           | 7 (1-19)               | 0.1 (0-0.3)            | 0 (0-0)       | 0 (0-0)        | 1 (0-4)              | 0 (0-0.1)           |
| El Salvador | UTI                            | 269 (179-395)     | 4.3 (2.8-6.3)     | 5,520 (3,590-8,270)    | 91.8 (59.2-137.8)      | 65 (42-98)    | 1 (0.7-1.6)    | 1,340 (848-2,040)    | 22.3 (14-34)        |
| Grenada     | All                            | 72 (50-99)        | 74.2 (52.4-101.2) | 1,860 (1,280-2,600)    | 1859.7 (1281.3-2575.4) | 18 (12-26)    | 18.8 (13-26.3) | 468 (317-669)        | 465.9 (316.7-662.4) |
| Grenada     | Bacterial skin infections      | 6 (3-9)           | 6 (3.6-9.8)       | 122 (74-198)           | 117.4 (72.4-190.8)     | 1 (1-2)       | 1.3 (0.8-2.3)  | 28 (16-45)           | 26.6 (15.3-44)      |
| Grenada     | Bone and joint infections      | 0 (0-1)           | 0.3 (0.1-0.7)     | 7 (2-16)               | 6.2 (1.7-14.8)         | 0 (0-0)       | 0.1 (0-0.2)    | 2 (0-4)              | 1.6 (0.4-3.8)       |
| Grenada     | BSI                            | 22 (12-36)        | 22.5 (12.3-37.2)  | 601 (342-951)          | 612.3 (355.2-946.2)    | 6 (3-10)      | 5.9 (3.2-9.8)  | 156 (87-249)         | 158.4 (90.3-250.7)  |
| Grenada     | Cardiac infections             | 2 (1-2)           | 1.7 (1.3-2.4)     | 47 (36-68)             | 43 (33.1-60.7)         | 0 (0-1)       | 0.4 (0.3-0.6)  | 12 (9-18)            | 11.2 (8.4-16)       |
| Grenada     | CNS infections                 | 0 (0-1)           | 0.3 (0.2-0.6)     | 15 (9-28)              | 15.5 (9-28.3)          | 0 (0-0)       | 0.1 (0-0.2)    | 3 (2-6)              | 3.6 (2-6.7)         |
| Grenada     | Diarrhoea                      | 0 (0-0)           | 0 (0-0)           | 1 (1-2)                | 1.3 (0.7-2.2)          | 0 (0-0)       | 0 (0-0)        | 0 (0-0)              | 0.3 (0.1-0.5)       |
| Grenada     | Gonorrhoea and chlamydia       |                   |                   | 1 (1-2)                | 0.9 (0.5-1.7)          |               |                | 0 (0-0)              | 0.1 (0-0.2)         |
| Grenada     | Intra-abdominal infections     | 13 (8-19)         | 12 (7.8-18)       | 322 (202-498)          | 287.1 (180.7-441.9)    | 3 (2-5)       | 3.1 (1.9-4.7)  | 83 (50-129)          | 73.5 (45-114.8)     |
| Grenada     | LRI and thorax infections      | 23 (17-31)        | 25.2 (19-33.4)    | 614 (451-827)          | 654.5 (474.4-879.8)    | 6 (4-8)       | 6.3 (4.6-8.6)  | 152 (107-210)        | 160.8 (112.8-222)   |
| Grenada     | TB                             | 0 (0-0)           | 0 (0-0.1)         | 1 (0-2)                | 0.6 (0.2-2.2)          | 0 (0-0)       | 0 (0-0)        | 0 (0-1)              | 0.2 (0-0.9)         |
| Grenada     | Typhoid, paratyphoid, and iNTS | 0 (0-0)           | 0 (0-0)           | 0 (0-0)                | 0 (0-0.1)              | 0 (0-0)       | 0 (0-0)        | 0 (0-0)              | 0 (0-0)             |
| Grenada     | UTI                            | 6 (4-9)           | 6.2 (4.5-8.8)     | 129 (91-184)           | 121 (86-172.2)         | 1 (1-2)       | 1.5 (1.1-2.2)  | 32 (22-47)           | 29.6 (20.4-43.6)    |

|           |                                |                       |                    |                           |                        |                     |                  |                          |                     |
|-----------|--------------------------------|-----------------------|--------------------|---------------------------|------------------------|---------------------|------------------|--------------------------|---------------------|
| Guatemala | All                            | 11,800 (8,090-16,500) | 104.5 (72.9-145.7) | 438,000 (298,000-628,000) | 2919.2 (1991.2-4164.1) | 2,850 (1,920-4,030) | 25.5 (17.4-35.6) | 104,000 (68,900-150,000) | 699.2 (465.7-996.1) |
| Guatemala | Bacterial skin infections      | 272 (110-564)         | 2.7 (1.1-5.5)      | 7,140 (3,080-14,000)      | 56.7 (24.1-112.4)      | 62 (24-129)         | 0.6 (0.2-1.3)    | 1,630 (680-3,310)        | 13 (5.2-26.9)       |
| Guatemala | Bone and joint infections      | 32 (9-76)             | 0.3 (0.1-0.7)      | 830 (218-2,090)           | 6.5 (1.7-16)           | 8 (2-18)            | 0.1 (0-0.2)      | 201 (53-515)             | 1.6 (0.4-4)         |
| Guatemala | BSI                            | 2,630 (1,420-4,270)   | 23 (11.8-37.7)     | 101,000 (58,500-160,000)  | 666.6 (374.1-1059.4)   | 654 (357-1,080)     | 5.7 (3-9.7)      | 24,800 (14,100-39,600)   | 164.5 (92.5-264.5)  |
| Guatemala | Cardiac infections             | 42 (30-59)            | 0.3 (0.2-0.5)      | 1,800 (1,240-2,530)       | 11.3 (8-15.5)          | 10 (7-15)           | 0.1 (0.1-0.1)    | 438 (296-615)            | 2.8 (1.9-3.8)       |
| Guatemala | CNS infections                 | 101 (70-149)          | 0.7 (0.5-1)        | 5,360 (3,600-8,030)       | 31.1 (20.9-46.1)       | 23 (15-34)          | 0.2 (0.1-0.2)    | 1,210 (773-1,840)        | 7 (4.5-10.6)        |
| Guatemala | Diarrhoea                      | 38 (20-64)            | 0.3 (0.2-0.5)      | 2,330 (1,230-4,040)       | 13 (7.1-22.5)          | 9 (4-17)            | 0.1 (0-0.1)      | 543 (251-1,040)          | 3 (1.4-5.7)         |
| Guatemala | Gonorrhoea and chlamydia       |                       |                    | 75 (30-162)               | 0.4 (0.2-0.8)          |                     |                  | 7 (2-18)                 | 0 (0-0.1)           |
| Guatemala | Intra-abdominal infections     | 2,400 (1,450-3,620)   | 21.2 (13-31.5)     | 74,900 (43,100-118,000)   | 563.6 (327.4-871.7)    | 608 (362-957)       | 5.4 (3.2-8.4)    | 19,000 (10,900-30,400)   | 142.7 (83.1-228.9)  |
| Guatemala | LRI and thorax infections      | 5,720 (4,280-7,490)   | 51 (38.9-65.5)     | 230,000 (167,000-313,000) | 1457.3 (1066.9-1951.6) | 1,340 (957-1,820)   | 12.1 (8.8-16.1)  | 52,400 (36,700-73,600)   | 335 (236.6-462.5)   |
| Guatemala | TB                             | 50 (22-109)           | 0.4 (0.2-0.8)      | 2,190 (969-4,780)         | 14.2 (6.2-30.8)        | 20 (3-59)           | 0.1 (0-0.4)      | 816 (128-2,510)          | 5.3 (0.8-15.9)      |
| Guatemala | Typhoid, paratyphoid, and iNTS | 17 (3-33)             | 0.1 (0-0.2)        | 851 (169-1,770)           | 4.9 (1-9.9)            | 3 (0-8)             | 0 (0-0.1)        | 167 (15-428)             | 1 (0.1-2.5)         |
| Guatemala | UTI                            | 457 (276-716)         | 4.5 (2.8-7.2)      | 11,600 (7,150-18,100)     | 93.5 (56.9-146.7)      | 114 (67-182)        | 1.1 (0.7-1.8)    | 2,890 (1,730-4,590)      | 23.4 (13.7-37.3)    |
| Guyana    | All                            | 579 (373-855)         | 102.7 (67.6-148.4) | 19,300 (12,200-29,100)    | 2895.5 (1836.6-4327.8) | 147 (93-218)        | 26.2 (16.9-38)   | 4,860 (3,030-7,290)      | 729 (458.4-1084.4)  |
| Guyana    | Bacterial skin infections      | 21 (7-43)             | 3.9 (1.4-8.1)      | 519 (185-1,100)           | 81.6 (28.7-169.2)      | 5 (2-11)            | 0.9 (0.3-2)      | 122 (41-268)             | 19 (6.4-42.1)       |
| Guyana    | Bone and joint infections      | 2 (0-5)               | 0.4 (0.1-0.9)      | 51 (12-129)               | 7.8 (1.9-19.7)         | 0 (0-1)             | 0.1 (0-0.2)      | 13 (3-34)                | 2 (0.5-5.2)         |
| Guyana    | BSI                            | 155 (82-254)          | 26.9 (14.1-44.5)   | 5,620 (3,220-8,930)       | 839.3 (479.7-1341.9)   | 39 (21-65)          | 6.7 (3.5-11.4)   | 1,390 (798-2,230)        | 208.4 (119.4-333.5) |
| Guyana    | Cardiac infections             | 11 (8-14)             | 1.7 (1.2-2.3)      | 369 (255-506)             | 51.2 (36-69.6)         | 3 (2-4)             | 0.4 (0.3-0.6)    | 91 (63-128)              | 12.7 (8.9-17.6)     |

|        |                                |                       |                  |                           |                        |                     |                 |                          |                     |
|--------|--------------------------------|-----------------------|------------------|---------------------------|------------------------|---------------------|-----------------|--------------------------|---------------------|
| Guyana | CNS infections                 | 4 (2-8)               | 0.6 (0.3-1.2)    | 219 (120-397)             | 29.5 (16.3-53.6)       | 1 (1-2)             | 0.1 (0.1-0.3)   | 51 (27-94)               | 6.9 (3.7-12.8)      |
| Guyana | Diarrhoea                      | 0 (0-1)               | 0.1 (0-0.1)      | 32 (17-52)                | 4.6 (2.5-7.6)          | 0 (0-0)             | 0 (0-0)         | 7 (4-12)                 | 1.1 (0.6-1.8)       |
| Guyana | Gonorrhoea and chlamydia       |                       |                  | 8 (3-16)                  | 0.9 (0.4-1.7)          |                     |                 | 1 (0-2)                  | 0.1 (0-0.2)         |
| Guyana | Intra-abdominal infections     | 116 (69-178)          | 18.9 (11.5-28.4) | 3,540 (2,030-5,480)       | 506.8 (296.6-785.3)    | 30 (18-47)          | 4.8 (2.9-7.6)   | 907 (508-1,470)          | 129.8 (73.8-208.8)  |
| Guyana | LRI and thorax infections      | 240 (163-344)         | 44.8 (30.8-63)   | 8,220 (5,340-11,900)      | 1255.2 (827.4-1813.3)  | 62 (40-90)          | 11.7 (7.6-16.6) | 2,080 (1,310-3,050)      | 318.7 (200.4-466)   |
| Guyana | TB                             | 2 (1-6)               | 0.2 (0.1-0.9)    | 66 (22-262)               | 8.7 (2.9-34.7)         | 1 (0-4)             | 0.1 (0-0.5)     | 28 (3-142)               | 3.8 (0.4-18.9)      |
| Guyana | Typhoid, paratyphoid, and iNTS | 0 (0-1)               | 0 (0-0.1)        | 11 (3-32)                 | 1.5 (0.4-4.2)          | 0 (0-0)             | 0 (0-0)         | 2 (0-7)                  | 0.3 (0-0.9)         |
| Guyana | UTI                            | 27 (19-39)            | 5.2 (3.6-7.3)    | 691 (468-989)             | 108.4 (73.8-154.3)     | 7 (4-10)            | 1.3 (0.8-1.8)   | 168 (111-246)            | 26.3 (17.5-38.3)    |
| Haiti  | All                            | 10,200 (7,220-14,000) | 121.3 (84-170.6) | 564,000 (413,000-751,000) | 4574.1 (3335.7-6210.7) | 2,470 (1,700-3,460) | 30 (20-42.4)    | 135,000 (95,600-180,000) | 1102.1 (771-1514.7) |
| Haiti  | Bacterial skin infections      | 382 (181-717)         | 6.6 (3-12.4)     | 11,300 (5,640-21,000)     | 138.2 (67.6-255.4)     | 84 (38-160)         | 1.4 (0.6-2.8)   | 2,490 (1,200-4,680)      | 30.2 (14.1-56.7)    |
| Haiti  | Bone and joint infections      | 28 (7-71)             | 0.4 (0.1-1.1)    | 1,050 (259-2,820)         | 10.9 (2.8-27.8)        | 7 (2-17)            | 0.1 (0-0.3)     | 253 (60-681)             | 2.6 (0.6-6.8)       |
| Haiti  | BSI                            | 2,650 (1,630-4,010)   | 31.3 (17.8-50.3) | 145,000 (96,000-211,000)  | 1178.5 (751.2-1761.1)  | 664 (411-1,020)     | 7.9 (4.5-12.7)  | 36,200 (23,200-53,900)   | 294.9 (185-442.4)   |
| Haiti  | Cardiac infections             | 59 (39-91)            | 0.7 (0.5-1.1)    | 2,590 (1,670-4,120)       | 24 (16-37)             | 15 (10-22)          | 0.2 (0.1-0.3)   | 641 (410-1,020)          | 6 (4-9.1)           |
| Haiti  | CNS infections                 | 637 (403-965)         | 4.8 (3-7.6)      | 50,800 (31,900-77,800)    | 344.6 (218.3-528.8)    | 149 (90-238)        | 1.1 (0.7-1.8)   | 11,900 (7,140-18,500)    | 80.3 (48.6-126.5)   |
| Haiti  | Diarrhoea                      | 60 (26-120)           | 0.5 (0.2-0.9)    | 5,030 (2,060-10,300)      | 33.8 (14.6-67.7)       | 15 (6-30)           | 0.1 (0.1-0.2)   | 1,210 (470-2,570)        | 8.2 (3.3-17.1)      |
| Haiti  | Gonorrhoea and chlamydia       |                       |                  | 143 (46-406)              | 1.1 (0.4-2.9)          |                     |                 | 14 (3-42)                | 0.1 (0-0.3)         |
| Haiti  | Intra-abdominal infections     | 1,400 (775-2,210)     | 20.2 (11.7-31.1) | 48,400 (24,500-83,800)    | 530.7 (287.8-862.1)    | 352 (196-564)       | 5.1 (3-8)       | 12,200 (5,950-21,100)    | 133.5 (70.8-217.9)  |
| Haiti  | LRI and thorax infections      | 4,660 (3,430-6,180)   | 51.9 (37.1-71.9) | 290,000 (214,000-375,000) | 2201.9 (1632.1-2882.4) | 1,110 (781-1,500)   | 12.8 (8.8-17.9) | 67,100 (47,600-89,700)   | 517.8 (363.7-692.2) |

|          |                                |                     |                   |                           |                        |                   |                  |                        |                     |
|----------|--------------------------------|---------------------|-------------------|---------------------------|------------------------|-------------------|------------------|------------------------|---------------------|
| Haiti    | TB                             | 23 (9-68)           | 0.3 (0.1-0.8)     | 1,130 (423-3,420)         | 10 (3.8-29.5)          | 10 (2-40)         | 0.1 (0-0.5)      | 462 (73-1,870)         | 4.1 (0.6-16.3)      |
| Haiti    | Typhoid, paratyphoid, and iNTS | 2 (1-5)             | 0 (0-0)           | 153 (43-370)              | 1 (0.3-2.5)            | 0 (0-1)           | 0 (0-0)          | 30 (4-93)              | 0.2 (0-0.6)         |
| Haiti    | UTI                            | 270 (179-427)       | 4.6 (3-7.5)       | 8,310 (5,610-12,200)      | 99.5 (65.9-152.9)      | 66 (43-103)       | 1.1 (0.7-1.8)    | 2,020 (1,360-2,940)    | 24.2 (15.9-36.8)    |
| Honduras | All                            | 5,240 (3,530-7,380) | 90.4 (61.4-126.2) | 170,000 (111,000-246,000) | 2235.5 (1492.7-3204.2) | 1,320 (886-1,880) | 22.8 (15.5-32.4) | 41,900 (27,500-61,100) | 556.4 (368.6-806.9) |
| Honduras | Bacterial skin infections      | 125 (56-256)        | 2.4 (1.1-4.8)     | 3,080 (1,440-5,990)       | 47.6 (22.2-93.9)       | 29 (12-58)        | 0.6 (0.2-1.1)    | 703 (314-1,440)        | 10.9 (4.8-21.9)     |
| Honduras | Bone and joint infections      | 16 (5-35)           | 0.3 (0.1-0.7)     | 392 (110-916)             | 6 (1.7-13.5)           | 4 (1-9)           | 0.1 (0-0.2)      | 97 (28-239)            | 1.5 (0.4-3.5)       |
| Honduras | BSI                            | 1,500 (876-2,340)   | 25.2 (14-40.8)    | 52,000 (32,000-76,900)    | 661.7 (397.6-991)      | 371 (210-594)     | 6.2 (3.4-10.3)   | 12,700 (7,830-19,400)  | 162.4 (97.8-250.6)  |
| Honduras | Cardiac infections             | 32 (21-45)          | 0.6 (0.4-0.8)     | 840 (532-1,270)           | 12.4 (8.1-18)          | 8 (5-11)          | 0.1 (0.1-0.2)    | 205 (127-314)          | 3 (1.9-4.5)         |
| Honduras | CNS infections                 | 48 (31-75)          | 0.7 (0.5-1.1)     | 2,300 (1,420-3,700)       | 25.6 (16.4-40.9)       | 11 (7-17)         | 0.2 (0.1-0.2)    | 507 (302-828)          | 5.7 (3.5-9.2)       |
| Honduras | Diarrhoea                      | 22 (10-42)          | 0.3 (0.1-0.6)     | 1,560 (741-3,020)         | 15.3 (7.2-29)          | 5 (2-10)          | 0.1 (0-0.1)      | 347 (138-704)          | 3.4 (1.4-6.7)       |
| Honduras | Gonorrhoea and chlamydia       |                     |                   | 38 (14-90)                | 0.4 (0.1-0.9)          |                   |                  | 4 (1-11)               | 0 (0-0.1)           |
| Honduras | Intra-abdominal infections     | 1,620 (1,040-2,420) | 28.2 (18.1-41.3)  | 46,000 (28,500-69,000)    | 656.4 (411-989.9)      | 407 (254-597)     | 7.1 (4.4-10.4)   | 11,600 (6,960-17,600)  | 165 (101.4-247)     |
| Honduras | LRI and thorax infections      | 1,480 (959-2,140)   | 25.5 (16.5-37)    | 53,700 (34,400-77,900)    | 659.9 (431.5-951.3)    | 374 (234-554)     | 6.5 (4-9.8)      | 13,000 (8,150-19,200)  | 163.2 (103.1-241.3) |
| Honduras | TB                             | 77 (37-158)         | 1.3 (0.6-2.6)     | 2,530 (1,190-5,160)       | 34.6 (16.7-69.9)       | 30 (7-87)         | 0.5 (0.1-1.4)    | 935 (208-2,690)        | 12.9 (2.9-37.1)     |
| Honduras | Typhoid, paratyphoid, and iNTS | 0 (0-1)             | 0 (0-0)           | 11 (2-30)                 | 0.1 (0-0.3)            | 0 (0-0)           | 0 (0-0)          | 2 (0-7)                | 0 (0-0.1)           |
| Honduras | UTI                            | 316 (185-494)       | 6.1 (3.5-9.4)     | 7,240 (4,130-11,700)      | 115.5 (67.5-183.3)     | 78 (44-124)       | 1.5 (0.8-2.3)    | 1,780 (996-2,890)      | 28.4 (15.9-45.7)    |
| Jamaica  | All                            | 1,430 (907-2,110)   | 47.5 (29.9-70.4)  | 34,900 (21,300-53,300)    | 1342.7 (816.7-2060)    | 376 (232-566)     | 12.5 (7.7-18.7)  | 9,110 (5,520-13,900)   | 349.4 (213.7-543.5) |
| Jamaica  | Bacterial skin infections      | 117 (61-203)        | 3.6 (1.8-6.5)     | 2,100 (1,070-3,780)       | 70.3 (35.6-127.7)      | 27 (13-49)        | 0.8 (0.4-1.5)    | 486 (239-891)          | 16.3 (7.9-30)       |

|         |                                |                         |                 |                                 |                        |                        |                  |                           |                     |
|---------|--------------------------------|-------------------------|-----------------|---------------------------------|------------------------|------------------------|------------------|---------------------------|---------------------|
| Jamaica | Bone and joint infections      | 5 (1-13)                | 0.2 (0-0.4)     | 116 (29-288)                    | 3.9 (1-9.7)            | 1 (0-4)                | 0 (0-0.1)        | 31 (8-80)                 | 1 (0.3-2.7)         |
| Jamaica | BSI                            | 551 (280-942)           | 18.8 (9.8-31.3) | 14,500 (8,010-23,200)           | 577 (328.4-901.1)      | 150 (76-257)           | 5.1 (2.7-8.5)    | 3,910 (2,170-6,310)       | 154.7 (87.4-243.6)  |
| Jamaica | Cardiac infections             | 28 (16-38)              | 0.9 (0.5-1.2)   | 751 (444-1,030)                 | 25.1 (15-34.6)         | 8 (4-11)               | 0.2 (0.1-0.3)    | 203 (115-288)             | 6.8 (3.9-9.6)       |
| Jamaica | CNS infections                 | 15 (8-29)               | 0.5 (0.3-0.9)   | 643 (363-1,170)                 | 25.4 (14.1-45.7)       | 4 (2-7)                | 0.1 (0.1-0.2)    | 154 (85-285)              | 6.1 (3.3-11.1)      |
| Jamaica | Diarrhoea                      | 0 (0-1)                 | 0 (0-0)         | 24 (12-42)                      | 1 (0.5-1.7)            | 0 (0-0)                | 0 (0-0)          | 5 (2-9)                   | 0.2 (0.1-0.4)       |
| Jamaica | Gonorrhoea and chlamydia       |                         |                 | 23 (9-50)                       | 0.7 (0.3-1.6)          |                        |                  | 2 (1-6)                   | 0.1 (0-0.2)         |
| Jamaica | Intra-abdominal infections     | 190 (111-309)           | 6.2 (3.7-10.2)  | 4,400 (2,510-7,430)             | 150.2 (86-253.2)       | 49 (28-83)             | 1.6 (0.9-2.7)    | 1,150 (633-2,010)         | 39.3 (21.6-68.4)    |
| Jamaica | LRI and thorax infections      | 389 (239-604)           | 13.1 (7.9-20.4) | 9,970 (5,940-15,800)            | 411.4 (243.2-648.8)    | 105 (62-164)           | 3.5 (2.1-5.6)    | 2,600 (1,530-4,120)       | 105.9 (61.4-166)    |
| Jamaica | TB                             | 0 (0-1)                 | 0 (0-0)         | 15 (3-52)                       | 0.5 (0.1-1.7)          | 0 (0-1)                | 0 (0-0)          | 7 (1-28)                  | 0.2 (0-0.9)         |
| Jamaica | Typhoid, paratyphoid, and iNTS | 0 (0-0)                 | 0 (0-0)         | 0 (0-1)                         | 0 (0-0)                | 0 (0-0)                | 0 (0-0)          | 0 (0-0)                   | 0 (0-0)             |
| Jamaica | UTI                            | 134 (88-186)            | 4.2 (2.7-5.9)   | 2,310 (1,560-3,250)             | 77 (52.2-108.7)        | 33 (21-47)             | 1 (0.7-1.5)      | 566 (378-815)             | 18.9 (12.6-27.2)    |
| Mexico  | All                            | 70,100 (47,400-100,000) | 63 (42.9-89.6)  | 1,970,000 (1,350,000-2,780,000) | 1703.9 (1178.7-2384.6) | 18,300 (12,400-26,100) | 16.4 (11.3-23.4) | 511,000 (349,000-727,000) | 440.6 (302.9-624.6) |
| Mexico  | Bacterial skin infections      | 2,240 (985-4,420)       | 2 (0.9-4)       | 51,500 (23,700-98,900)          | 43.5 (20.1-84.5)       | 529 (228-1,050)        | 0.5 (0.2-0.9)    | 12,200 (5,510-24,100)     | 10.3 (4.6-20.2)     |
| Mexico  | Bone and joint infections      | 232 (67-541)            | 0.2 (0.1-0.5)   | 5,710 (1,580-13,800)            | 4.8 (1.3-11.4)         | 59 (16-141)            | 0.1 (0-0.1)      | 1,430 (395-3,540)         | 1.2 (0.3-3)         |
| Mexico  | BSI                            | 21,700 (11,900-35,500)  | 19.6 (10.8-32)  | 659,000 (386,000-1,020,000)     | 579.4 (344.6-886)      | 5,690 (3,130-9,380)    | 5.1 (2.8-8.5)    | 172,000 (101,000-269,000) | 150.8 (90.6-234.1)  |
| Mexico  | Cardiac infections             | 425 (307-584)           | 0.4 (0.3-0.5)   | 13,600 (9,860-18,600)           | 11.2 (8.1-15.3)        | 111 (78-155)           | 0.1 (0.1-0.1)    | 3,520 (2,490-4,850)       | 2.9 (2.1-4)         |
| Mexico  | CNS infections                 | 293 (183-521)           | 0.2 (0.2-0.4)   | 13,600 (8,640-22,600)           | 11.4 (7.2-19.1)        | 72 (44-130)            | 0.1 (0-0.1)      | 3,310 (2,020-5,730)       | 2.8 (1.7-4.8)       |
| Mexico  | Diarrhoea                      | 47 (28-78)              | 0 (0-0.1)       | 2,670 (1,480-4,460)             | 2.5 (1.4-4.2)          | 12 (7-21)              | 0 (0-0)          | 662 (348-1,150)           | 0.6 (0.3-1.1)       |



|           |                                |                        |                  |                           |                        |                     |               |                          |                     |
|-----------|--------------------------------|------------------------|------------------|---------------------------|------------------------|---------------------|---------------|--------------------------|---------------------|
| Mexico    | Gonorrhoea and chlamydia       |                        |                  | 576 (314-939)             | 0.4 (0.2-0.7)          |                     |               | 57 (16-118)              | 0 (0-0.1)           |
| Mexico    | Intra-abdominal infections     | 20,500 (13,300-28,800) | 17.8 (11.7-25)   | 533,000 (333,000-774,000) | 439 (276.4-630.4)      | 5,360 (3,450-7,890) | 4.7 (3-6.8)   | 140,000 (87,400-212,000) | 115 (72.3-173.3)    |
| Mexico    | LRI and thorax infections      | 17,800 (12,600-24,400) | 16.5 (11.7-22.6) | 536,000 (397,000-714,000) | 478 (353.1-634.2)      | 4,620 (3,170-6,490) | 4.3 (2.9-6)   | 137,000 (97,300-186,000) | 121.8 (86.5-165.7)  |
| Mexico    | TB                             | 318 (156-688)          | 0.3 (0.1-0.6)    | 11,700 (5,790-25,200)     | 9.2 (4.6-20)           | 133 (26-397)        | 0.1 (0-0.3)   | 4,480 (899-13,400)       | 3.5 (0.7-10.6)      |
| Mexico    | Typhoid, paratyphoid, and iNTS | 26 (4-141)             | 0 (0-0.1)        | 972 (164-4,650)           | 0.8 (0.1-3.9)          | 5 (0-25)            | 0 (0-0)       | 183 (19-806)             | 0.2 (0-0.7)         |
| Mexico    | UTI                            | 6,540 (4,690-9,090)    | 6 (4.3-8.2)      | 145,000 (103,000-204,000) | 123.7 (87.8-173.4)     | 1,670 (1,160-2,410) | 1.5 (1.1-2.2) | 37,200 (25,500-53,400)   | 31.6 (21.8-45.3)    |
| Nicaragua | All                            | 2,460 (1,640-3,530)    | 59.1 (39.4-85.1) | 80,300 (55,000-115,000)   | 1548.6 (1055.3-2201.5) | 630 (408-917)       | 15.2 (9.9-22) | 20,400 (13,600-29,500)   | 393.7 (261.2-571.4) |
| Nicaragua | Bacterial skin infections      | 80 (33-166)            | 2.1 (0.9-4.2)    | 2,010 (925-3,920)         | 42.6 (19.1-84.6)       | 18 (7-38)           | 0.5 (0.2-1)   | 455 (201-938)            | 9.6 (4.1-20)        |
| Nicaragua | Bone and joint infections      | 9 (2-21)               | 0.2 (0.1-0.5)    | 224 (66-519)              | 4.6 (1.4-10.9)         | 2 (1-5)             | 0.1 (0-0.1)   | 57 (15-141)              | 1.2 (0.3-2.9)       |
| Nicaragua | BSI                            | 895 (498-1,450)        | 21.2 (11.4-35.1) | 30,300 (18,500-46,600)    | 578.1 (342.8-893.9)    | 230 (126-376)       | 5.5 (2.9-9.1) | 7,710 (4,630-12,000)     | 147.7 (86.6-234)    |
| Nicaragua | Cardiac infections             | 24 (16-35)             | 0.6 (0.4-0.8)    | 744 (511-1,080)           | 14.1 (9.7-20.7)        | 6 (4-9)             | 0.1 (0.1-0.2) | 189 (126-285)            | 3.6 (2.4-5.4)       |
| Nicaragua | CNS infections                 | 19 (12-31)             | 0.3 (0.2-0.6)    | 1,070 (700-1,710)         | 17.2 (11.2-27.9)       | 4 (3-8)             | 0.1 (0.1-0.1) | 251 (158-405)            | 4 (2.5-6.6)         |
| Nicaragua | Diarrhoea                      | 4 (2-7)                | 0.1 (0-0.2)      | 259 (111-529)             | 4.4 (1.9-8.9)          | 1 (0-2)             | 0 (0-0)       | 60 (25-125)              | 1 (0.4-2.1)         |
| Nicaragua | Gonorrhoea and chlamydia       |                        |                  | 23 (11-46)                | 0.3 (0.2-0.6)          |                     |               | 2 (1-5)                  | 0 (0-0.1)           |
| Nicaragua | Intra-abdominal infections     | 630 (391-923)          | 14.9 (9.4-21.7)  | 17,100 (10,200-25,800)    | 349.9 (212.3-519)      | 161 (99-244)        | 3.8 (2.4-5.7) | 4,390 (2,580-6,860)      | 89.6 (54-137.9)     |
| Nicaragua | LRI and thorax infections      | 647 (475-880)          | 15.9 (11.5-21.7) | 24,900 (18,800-32,700)    | 457.9 (344.5-606)      | 168 (116-236)       | 4.2 (2.8-5.9) | 6,260 (4,420-8,410)      | 116.4 (81.6-157.9)  |
| Nicaragua | TB                             | 12 (5-26)              | 0.3 (0.1-0.6)    | 445 (200-976)             | 8 (3.6-17.5)           | 5 (1-14)            | 0.1 (0-0.3)   | 162 (23-486)             | 2.9 (0.4-8.8)       |

|           |                                |                     |                  |                         |                       |                 |                 |                        |                     |
|-----------|--------------------------------|---------------------|------------------|-------------------------|-----------------------|-----------------|-----------------|------------------------|---------------------|
| Nicaragua | Typhoid, paratyphoid, and iNTS | 0 (0-1)             | 0 (0-0)          | 10 (2-25)               | 0.2 (0-0.4)           | 0 (0-0)         | 0 (0-0)         | 2 (0-6)                | 0 (0-0.1)           |
| Nicaragua | UTI                            | 137 (84-221)        | 3.6 (2.2-5.7)    | 3,270 (2,020-5,310)     | 71.3 (44.1-115.1)     | 34 (20-55)      | 0.9 (0.5-1.4)   | 810 (491-1,330)        | 17.6 (10.7-28.9)    |
| Panama    | All                            | 1,530 (1,000-2,270) | 36.6 (23.9-54.4) | 43,400 (28,000-65,000)  | 1076.7 (694-1609.8)   | 382 (245-572)   | 9.1 (5.8-13.7)  | 10,700 (6,800-16,100)  | 264.9 (169-398.4)   |
| Panama    | Bacterial skin infections      | 62 (30-118)         | 1.5 (0.7-2.8)    | 1,260 (601-2,410)       | 30.4 (14.4-58.1)      | 14 (6-27)       | 0.3 (0.1-0.6)   | 276 (125-551)          | 6.6 (3-13.2)        |
| Panama    | Bone and joint infections      | 4 (1-11)            | 0.1 (0-0.3)      | 102 (27-255)            | 2.5 (0.6-6.1)         | 1 (0-3)         | 0 (0-0.1)       | 25 (6-64)              | 0.6 (0.2-1.5)       |
| Panama    | BSI                            | 521 (272-876)       | 12.6 (6.6-21.1)  | 16,100 (9,110-25,700)   | 403.3 (230.4-640.8)   | 131 (68-225)    | 3.2 (1.7-5.4)   | 3,990 (2,310-6,480)    | 99.8 (58-161.9)     |
| Panama    | Cardiac infections             | 26 (16-36)          | 0.6 (0.4-0.9)    | 732 (478-1,030)         | 17.6 (11.5-24.6)      | 6 (4-9)         | 0.2 (0.1-0.2)   | 182 (115-261)          | 4.4 (2.8-6.3)       |
| Panama    | CNS infections                 | 13 (9-20)           | 0.3 (0.2-0.5)    | 706 (452-1,070)         | 17.7 (11.3-26.9)      | 3 (2-5)         | 0.1 (0-0.1)     | 161 (98-247)           | 4 (2.5-6.2)         |
| Panama    | Diarrhoea                      | 3 (2-6)             | 0.1 (0-0.1)      | 240 (119-436)           | 6.1 (3-11.2)          | 1 (0-1)         | 0 (0-0)         | 51 (23-97)             | 1.3 (0.6-2.5)       |
| Panama    | Gonorrhoea and chlamydia       |                     |                  | 14 (6-30)               | 0.3 (0.1-0.7)         |                 |                 | 1 (0-3)                | 0 (0-0.1)           |
| Panama    | Intra-abdominal infections     | 304 (187-472)       | 7.3 (4.5-11.3)   | 7,400 (4,300-11,900)    | 179 (103.9-287.8)     | 76 (45-122)     | 1.8 (1.1-2.9)   | 1,860 (1,050-3,070)    | 44.9 (25.3-74.2)    |
| Panama    | LRI and thorax infections      | 461 (322-641)       | 10.9 (7.6-15.3)  | 13,700 (9,430-19,400)   | 345.2 (236.3-488.8)   | 113 (76-166)    | 2.7 (1.8-4)     | 3,280 (2,170-4,710)    | 82.2 (54.4-117.9)   |
| Panama    | TB                             | 21 (9-52)           | 0.5 (0.2-1.2)    | 807 (339-2,000)         | 19.4 (8.2-48.2)       | 9 (2-32)        | 0.2 (0-0.8)     | 318 (68-1,160)         | 7.7 (1.6-27.9)      |
| Panama    | Typhoid, paratyphoid, and iNTS | 0 (0-0)             | 0 (0-0)          | 0 (0-0)                 | 0 (0-0)               | 0 (0-0)         | 0 (0-0)         | 0 (0-0)                | 0 (0-0)             |
| Panama    | UTI                            | 118 (76-174)        | 2.7 (1.8-4.1)    | 2,300 (1,470-3,490)     | 55.1 (35.3-84)        | 29 (18-44)      | 0.7 (0.4-1)     | 557 (346-859)          | 13.4 (8.3-20.7)     |
| Paraguay  | All                            | 3,050 (2,010-4,490) | 56.1 (37-81.9)   | 90,400 (58,100-134,000) | 1526.4 (983.7-2261.1) | 786 (508-1,170) | 14.4 (9.4-21.3) | 23,100 (14,400-34,500) | 389.7 (244.5-579.4) |
| Paraguay  | Bacterial skin infections      | 104 (46-211)        | 2 (0.8-4)        | 2,420 (1,120-4,690)     | 41.8 (19-82.6)        | 23 (10-48)      | 0.4 (0.2-0.9)   | 530 (239-1,090)        | 9.1 (4-19)          |
| Paraguay  | Bone and joint infections      | 11 (3-26)           | 0.2 (0.1-0.5)    | 287 (81-685)            | 4.8 (1.3-11.6)        | 3 (1-7)         | 0.1 (0-0.1)     | 71 (20-182)            | 1.2 (0.3-3)         |

|          |                                |                        |                  |                           |                     |                     |               |                          |                    |
|----------|--------------------------------|------------------------|------------------|---------------------------|---------------------|---------------------|---------------|--------------------------|--------------------|
| Paraguay | BSI                            | 971 (519-1,590)        | 17.6 (9.4-29.1)  | 35,000 (20,300-55,000)    | 585.5 (341.4-919)   | 250 (136-420)       | 4.5 (2.4-7.7) | 8,950 (5,240-14,500)     | 149.9 (87.5-241.3) |
| Paraguay | Cardiac infections             | 54 (34-77)             | 1 (0.6-1.4)      | 1,480 (961-2,110)         | 24.4 (15.7-34.6)    | 14 (9-20)           | 0.3 (0.2-0.4) | 380 (244-546)            | 6.3 (4-9.1)        |
| Paraguay | CNS infections                 | 24 (16-37)             | 0.4 (0.3-0.6)    | 1,390 (880-2,080)         | 21.5 (13.5-32.2)    | 6 (4-9)             | 0.1 (0.1-0.1) | 325 (202-494)            | 5 (3.1-7.7)        |
| Paraguay | Diarrhoea                      | 2 (1-3)                | 0 (0-0.1)        | 189 (92-369)              | 3 (1.5-5.7)         | 0 (0-1)             | 0 (0-0)       | 38 (18-73)               | 0.6 (0.3-1.2)      |
| Paraguay | Gonorrhoea and chlamydia       |                        |                  | 47 (21-96)                | 0.6 (0.3-1.3)       |                     |               | 5 (1-11)                 | 0.1 (0-0.1)        |
| Paraguay | Intra-abdominal infections     | 584 (361-884)          | 10.7 (6.7-16.2)  | 14,900 (8,800-23,600)     | 253.6 (150.7-396.2) | 152 (93-237)        | 2.8 (1.7-4.3) | 3,910 (2,230-6,410)      | 66.4 (38.3-107.8)  |
| Paraguay | LRI and thorax infections      | 1,040 (710-1,480)      | 19.2 (13.2-27.4) | 28,800 (18,800-42,200)    | 488.9 (321.1-716.5) | 266 (177-387)       | 4.9 (3.3-7.2) | 7,250 (4,660-10,700)     | 123.4 (79.4-182.4) |
| Paraguay | TB                             | 26 (8-68)              | 0.4 (0.1-1.2)    | 953 (297-2,490)           | 14.8 (4.6-38.8)     | 12 (2-42)           | 0.2 (0-0.7)   | 427 (60-1,450)           | 6.7 (0.9-22.8)     |
| Paraguay | Typhoid, paratyphoid, and iNTS | 1 (0-2)                | 0 (0-0)          | 36 (10-89)                | 0.5 (0.2-1.3)       | 0 (0-0)             | 0 (0-0)       | 7 (1-22)                 | 0.1 (0-0.3)        |
| Paraguay | UTI                            | 242 (152-350)          | 4.6 (2.9-6.7)    | 4,940 (3,170-7,360)       | 87 (55.7-128.9)     | 59 (36-88)          | 1.1 (0.7-1.7) | 1,190 (742-1,820)        | 21 (12.9-32.2)     |
| Peru     | All                            | 20,900 (14,600-29,200) | 64 (44.7-89.6)   | 567,000 (377,000-822,000) | 1757 (1170.8-2545)  | 5,220 (3,580-7,420) | 16 (11-22.8)  | 140,000 (92,500-205,000) | 434.5 (286.6-634)  |
| Peru     | Bacterial skin infections      | 276 (98-625)           | 0.8 (0.3-1.9)    | 6,140 (2,260-13,100)      | 18.8 (6.8-40.6)     | 64 (22-146)         | 0.2 (0.1-0.5) | 1,410 (512-3,080)        | 4.3 (1.6-9.5)      |
| Peru     | Bone and joint infections      | 38 (10-88)             | 0.1 (0-0.3)      | 827 (215-2,050)           | 2.5 (0.7-6.3)       | 10 (3-23)           | 0 (0-0.1)     | 209 (53-541)             | 0.6 (0.2-1.7)      |
| Peru     | BSI                            | 4,570 (2,440-7,430)    | 14.2 (7.6-23)    | 165,000 (99,300-255,000)  | 519.2 (314-794.9)   | 1,150 (629-1,930)   | 3.6 (2-6)     | 41,300 (24,500-64,700)   | 129.9 (77.6-202.4) |
| Peru     | Cardiac infections             | 123 (86-172)           | 0.4 (0.3-0.5)    | 3,700 (2,510-5,410)       | 11.1 (7.5-16.3)     | 31 (22-44)          | 0.1 (0.1-0.1) | 924 (618-1,350)          | 2.8 (1.9-4)        |
| Peru     | CNS infections                 | 83 (50-144)            | 0.3 (0.2-0.4)    | 4,190 (2,480-6,980)       | 12.7 (7.4-21.1)     | 19 (11-32)          | 0.1 (0-0.1)   | 931 (541-1,570)          | 2.8 (1.6-4.8)      |
| Peru     | Diarrhoea                      | 15 (7-30)              | 0 (0-0.1)        | 1,830 (573-4,880)         | 5.7 (1.8-15.2)      | 3 (1-7)             | 0 (0-0)       | 285 (108-635)            | 0.9 (0.3-2)        |
| Peru     | Gonorrhoea and chlamydia       |                        |                  | 147 (60-319)              | 0.4 (0.2-0.9)       |                     |               | 16 (4-41)                | 0 (0-0.1)          |
| Peru     | Intra-abdominal infections     | 3,650 (2,170-5,580)    | 11.3 (6.7-17.3)  | 91,100 (52,300-144,000)   | 278.8 (160.5-439.3) | 927 (542-1,480)     | 2.9 (1.7-4.6) | 23,200 (13,200-37,800)   | 71 (40.5-115.1)    |

|                       |                                |                       |                  |                           |                        |                     |                |                        |                     |
|-----------------------|--------------------------------|-----------------------|------------------|---------------------------|------------------------|---------------------|----------------|------------------------|---------------------|
| Peru                  | LRI and thorax infections      | 10,400 (7,740-13,600) | 31.5 (23.5-41.6) | 252,000 (177,000-348,000) | 781.3 (545.1-1079.2)   | 2,480 (1,760-3,430) | 7.5 (5.3-10.5) | 58,700 (39,700-82,800) | 181.8 (122.8-257)   |
| Peru                  | TB                             | 457 (235-839)         | 1.4 (0.7-2.5)    | 17,300 (8,890-30,700)     | 50.7 (26.1-90)         | 218 (43-522)        | 0.7 (0.1-1.6)  | 7,470 (1,480-17,600)   | 22 (4.4-51.6)       |
| Peru                  | Typhoid, paratyphoid, and iNTS | 7 (3-13)              | 0 (0-0)          | 393 (151-800)             | 1.2 (0.5-2.4)          | 1 (0-3)             | 0 (0-0)        | 81 (15-206)            | 0.2 (0-0.6)         |
| Peru                  | UTI                            | 1,300 (875-1,830)     | 4 (2.7-5.6)      | 24,400 (16,100-35,100)    | 74.8 (49.4-107.5)      | 316 (208-452)       | 1 (0.6-1.4)    | 5,900 (3,850-8,620)    | 18.1 (11.8-26.5)    |
| Saint Kitts and Nevis | All                            | 39 (27-54)            | 70 (48.4-97.6)   | 1,010 (677-1,470)         | 1691.2 (1137.3-2441.9) | 10 (7-14)           | 18 (12.1-25.8) | 260 (169-384)          | 432.3 (281.6-637.3) |
| Saint Kitts and Nevis | Bacterial skin infections      | 3 (1-4)               | 5 (2.9-8.5)      | 58 (31-106)               | 95.4 (53-168)          | 1 (0-1)             | 1.1 (0.6-2)    | 13 (7-24)              | 21.5 (11.3-39.1)    |
| Saint Kitts and Nevis | Bone and joint infections      | 0 (0-0)               | 0.3 (0.1-0.6)    | 4 (1-8)                   | 5.4 (1.5-12.8)         | 0 (0-0)             | 0.1 (0-0.2)    | 1 (0-2)                | 1.4 (0.4-3.4)       |
| Saint Kitts and Nevis | BSI                            | 13 (7-21)             | 23.6 (13-38.4)   | 367 (209-580)             | 616.3 (348.8-970.6)    | 4 (2-6)             | 6.4 (3.4-10.4) | 99 (55-157)            | 165.3 (91.8-262)    |
| Saint Kitts and Nevis | Cardiac infections             | 0 (0-1)               | 0.8 (0.5-1.1)    | 12 (7-18)                 | 18.6 (11.8-27.9)       | 0 (0-0)             | 0.2 (0.1-0.3)  | 3 (2-5)                | 5 (3.1-7.5)         |
| Saint Kitts and Nevis | CNS infections                 | 0 (0-0)               | 0.5 (0.3-0.8)    | 12 (7-20)                 | 22 (13.4-37.1)         | 0 (0-0)             | 0.1 (0.1-0.2)  | 3 (2-5)                | 5.1 (3-8.5)         |
| Saint Kitts and Nevis | Diarrhoea                      | 0 (0-0)               | 0 (0-0.1)        | 1 (1-3)                   | 3 (1.5-5.5)            | 0 (0-0)             | 0 (0-0)        | 0 (0-0)                | 0.6 (0.3-1.1)       |
| Saint Kitts and Nevis | Gonorrhoea and chlamydia       |                       |                  | 1 (0-2)                   | 0.9 (0.2-2.9)          |                     |                | 0 (0-0)                | 0.1 (0-0.3)         |
| Saint Kitts and Nevis | Intra-abdominal infections     | 8 (5-12)              | 12.7 (8.1-18.6)  | 203 (121-314)             | 298.5 (179.7-456.1)    | 2 (1-3)             | 3.3 (2-4.8)    | 52 (30-81)             | 76.5 (44.5-119.1)   |
| Saint Kitts and Nevis | LRI and thorax infections      | 10 (7-14)             | 19.6 (14.3-26.6) | 264 (180-375)             | 485.6 (336.3-673.3)    | 3 (2-4)             | 5 (3.5-6.9)    | 66 (43-96)             | 121 (81-173.3)      |
| Saint Kitts and Nevis | TB                             | 0 (0-0)               | 0 (0-0.1)        | 1 (0-3)                   | 1.1 (0.4-3.8)          | 0 (0-0)             | 0 (0-0.1)      | 0 (0-1)                | 0.4 (0.1-1.8)       |

|                                  |                                |              |                  |                     |                        |            |                 |                 |                     |
|----------------------------------|--------------------------------|--------------|------------------|---------------------|------------------------|------------|-----------------|-----------------|---------------------|
| Saint Kitts and Nevis            | Typhoid, paratyphoid, and iNTS | 0 (0-0)      | 0 (0-0)          | 0 (0-0)             | 0.1 (0-0.1)            | 0 (0-0)    | 0 (0-0)         | 0 (0-0)         | 0 (0-0)             |
| Saint Kitts and Nevis            | UTI                            | 4 (3-5)      | 7.5 (5.3-10)     | 89 (62-124)         | 144.1 (100.5-197.7)    | 1 (1-1)    | 1.8 (1.3-2.5)   | 22 (15-32)      | 35.3 (24.2-49.7)    |
| Saint Lucia                      | All                            | 111 (74-159) | 57 (37.8-81.8)   | 2,610 (1,660-3,830) | 1462.9 (930.1-2161.3)  | 29 (19-42) | 14.8 (9.6-21.6) | 675 (426-1,010) | 376.2 (236.8-565.6) |
| Saint Lucia                      | Bacterial skin infections      | 8 (5-14)     | 4.1 (2.4-7)      | 156 (89-276)        | 77.3 (44.6-135.5)      | 2 (1-3)    | 0.9 (0.5-1.6)   | 36 (19-63)      | 17.9 (9.7-30.9)     |
| Saint Lucia                      | Bone and joint infections      | 0 (0-1)      | 0.2 (0.1-0.5)    | 9 (2-23)            | 4.6 (1.2-11.2)         | 0 (0-0)    | 0.1 (0-0.1)     | 2 (1-6)         | 1.2 (0.3-3.1)       |
| Saint Lucia                      | BSI                            | 36 (19-62)   | 18.9 (9.8-32.2)  | 892 (466-1,460)     | 524.9 (291.9-842.2)    | 10 (5-17)  | 5.1 (2.6-8.6)   | 238 (126-393)   | 139.2 (76.3-226.5)  |
| Saint Lucia                      | Cardiac infections             | 4 (3-5)      | 1.8 (1.3-2.3)    | 93 (71-123)         | 45.3 (34.3-60.1)       | 1 (1-1)    | 0.5 (0.4-0.6)   | 25 (19-33)      | 12.1 (9.1-16.1)     |
| Saint Lucia                      | CNS infections                 | 1 (1-1)      | 0.5 (0.3-0.8)    | 36 (23-60)          | 23.6 (14.9-38.5)       | 0 (0-0)    | 0.1 (0.1-0.2)   | 8 (5-14)        | 5.5 (3.4-9)         |
| Saint Lucia                      | Diarrhoea                      | 0 (0-0)      | 0 (0-0)          | 2 (1-3)             | 1.3 (0.7-2.3)          | 0 (0-0)    | 0 (0-0)         | 0 (0-1)         | 0.3 (0.1-0.5)       |
| Saint Lucia                      | Gonorrhoea and chlamydia       |              |                  | 2 (1-3)             | 0.9 (0.4-1.7)          |            |                 | 0 (0-0)         | 0.1 (0-0.2)         |
| Saint Lucia                      | Intra-abdominal infections     | 19 (12-29)   | 9.3 (5.8-14)     | 467 (281-732)       | 223.7 (133.9-350.4)    | 5 (3-8)    | 2.4 (1.5-3.8)   | 122 (71-199)    | 58.5 (34.1-95.1)    |
| Saint Lucia                      | LRI and thorax infections      | 31 (21-45)   | 16.7 (11.4-23.6) | 733 (486-1,070)     | 454.9 (294.3-671.9)    | 8 (5-12)   | 4.3 (2.9-6.3)   | 188 (121-283)   | 114.5 (72-171.3)    |
| Saint Lucia                      | TB                             | 0 (0-0)      | 0 (0-0.1)        | 2 (1-8)             | 1.2 (0.4-3.9)          | 0 (0-0)    | 0 (0-0.1)       | 1 (0-4)         | 0.5 (0.1-2.2)       |
| Saint Lucia                      | Typhoid, paratyphoid, and iNTS | 0 (0-0)      | 0 (0-0)          | 0 (0-0)             | 0.1 (0-0.1)            | 0 (0-0)    | 0 (0-0)         | 0 (0-0)         | 0 (0-0)             |
| Saint Lucia                      | UTI                            | 11 (8-17)    | 5.6 (3.8-8.3)    | 217 (144-324)       | 105.3 (70.3-156.2)     | 3 (2-4)    | 1.4 (0.9-2.1)   | 54 (36-83)      | 26.3 (17.3-40.1)    |
| Saint Vincent and the Grenadines | All                            | 80 (54-112)  | 66.4 (44.8-93.5) | 1,990 (1,310-2,840) | 1738.4 (1145.9-2490.3) | 20 (14-30) | 17 (11.3-24.7)  | 507 (326-745)   | 440.9 (282.3-642.7) |

|                                  |                            |            |                  |                 |                     |          |               |               |                    |
|----------------------------------|----------------------------|------------|------------------|-----------------|---------------------|----------|---------------|---------------|--------------------|
| Saint Vincent and the Grenadines | Bacterial skin infections  | 6 (3-10)   | 4.8 (2.7-8.5)    | 121 (66-210)    | 96 (53.1-166.5)     | 1 (1-2)  | 1.1 (0.6-1.9) | 28 (14-48)    | 22 (11.6-38.2)     |
| Saint Vincent and the Grenadines | Bone and joint infections  | 0 (0-1)    | 0.3 (0.1-0.7)    | 7 (2-17)        | 5.5 (1.4-13.3)      | 0 (0-0)  | 0.1 (0-0.2)   | 2 (0-5)       | 1.4 (0.4-3.6)      |
| Saint Vincent and the Grenadines | BSI                        | 26 (14-44) | 22 (12-36.5)     | 702 (397-1,100) | 639.9 (372.5-984.7) | 7 (4-12) | 5.8 (3.1-9.7) | 183 (105-291) | 165.9 (97.8-260.4) |
| Saint Vincent and the Grenadines | Cardiac infections         | 1 (1-1)    | 0.8 (0.5-1.1)    | 26 (18-35)      | 20.3 (14.4-28.1)    | 0 (0-0)  | 0.2 (0.1-0.3) | 7 (5-9)       | 5.3 (3.7-7.4)      |
| Saint Vincent and the Grenadines | CNS infections             | 1 (0-1)    | 0.6 (0.4-1)      | 31 (20-50)      | 30.3 (19.1-48.9)    | 0 (0-0)  | 0.1 (0.1-0.2) | 7 (4-12)      | 7.1 (4.3-11.7)     |
| Saint Vincent and the Grenadines | Diarrhoea                  | 0 (0-0)    | 0 (0-0.1)        | 2 (1-3)         | 2.1 (1.2-3.5)       | 0 (0-0)  | 0 (0-0)       | 0 (0-1)       | 0.5 (0.3-0.8)      |
| Saint Vincent and the Grenadines | Gonorrhoea and chlamydia   |            |                  | 1 (1-2)         | 0.9 (0.4-1.7)       |          |               | 0 (0-0)       | 0.1 (0-0.2)        |
| Saint Vincent and the Grenadines | Intra-abdominal infections | 13 (8-20)  | 10.2 (6.4-15.5)  | 329 (197-510)   | 250.6 (149.9-390.7) | 3 (2-5)  | 2.6 (1.6-4.1) | 85 (50-136)   | 64.7 (37.8-104.7)  |
| Saint Vincent and the Grenadines | LRI and thorax infections  | 25 (17-36) | 21.2 (14.5-30.3) | 617 (413-895)   | 570.1 (374.2-829.8) | 6 (4-9)  | 5.5 (3.6-8)   | 157 (102-234) | 143.7 (93-211.7)   |

|                                  |                                |               |                  |                       |                        |             |                |                     |                     |
|----------------------------------|--------------------------------|---------------|------------------|-----------------------|------------------------|-------------|----------------|---------------------|---------------------|
| Saint Vincent and the Grenadines | TB                             | 0 (0-0)       | 0 (0-0.1)        | 2 (1-6)               | 1.4 (0.4-4.4)          | 0 (0-0)     | 0 (0-0.1)      | 1 (0-3)             | 0.6 (0.1-2.5)       |
| Saint Vincent and the Grenadines | Typhoid, paratyphoid, and iNTS | 0 (0-0)       | 0 (0-0)          | 0 (0-0)               | 0.1 (0-0.2)            | 0 (0-0)     | 0 (0-0)        | 0 (0-0)             | 0 (0-0)             |
| Saint Vincent and the Grenadines | UTI                            | 8 (6-10)      | 6.4 (4.8-8.7)    | 154 (114-211)         | 121.3 (89.7-164.9)     | 2 (1-3)     | 1.6 (1.1-2.2)  | 38 (27-53)          | 29.7 (21.4-41.5)    |
| Suriname                         | All                            | 390 (263-545) | 71.6 (48.5-99.6) | 11,800 (7,810-17,000) | 2225.8 (1477.3-3198.5) | 98 (65-141) | 18.1 (12-25.6) | 2,950 (1,910-4,320) | 555.1 (359.7-805.2) |
| Suriname                         | Bacterial skin infections      | 28 (17-45)    | 5.1 (3.2-8.1)    | 638 (407-1,020)       | 111.5 (71.5-177.3)     | 6 (4-10)    | 1.1 (0.7-1.9)  | 146 (86-235)        | 25.5 (15.2-40.8)    |
| Suriname                         | Bone and joint infections      | 2 (0-4)       | 0.3 (0.1-0.7)    | 37 (10-87)            | 6.3 (1.7-14.9)         | 0 (0-1)     | 0.1 (0-0.2)    | 9 (3-23)            | 1.6 (0.4-3.9)       |
| Suriname                         | BSI                            | 121 (67-194)  | 22.4 (12.6-35.6) | 4,160 (2,510-6,380)   | 812.4 (500.5-1237.3)   | 31 (17-50)  | 5.8 (3.2-9.2)  | 1,060 (633-1,660)   | 207.4 (126.8-320)   |
| Suriname                         | Cardiac infections             | 3 (2-4)       | 0.5 (0.4-0.7)    | 89 (62-122)           | 15.1 (10.6-20.6)       | 1 (1-1)     | 0.1 (0.1-0.2)  | 23 (16-32)          | 3.9 (2.7-5.4)       |
| Suriname                         | CNS infections                 | 4 (3-8)       | 0.8 (0.5-1.4)    | 239 (140-394)         | 46.4 (27.1-76.3)       | 1 (1-2)     | 0.2 (0.1-0.3)  | 56 (32-94)          | 10.8 (6.2-18.3)     |
| Suriname                         | Diarrhoea                      | 0 (0-0)       | 0.1 (0-0.1)      | 16 (8-29)             | 3.3 (1.7-6.1)          | 0 (0-0)     | 0 (0-0)        | 4 (2-6)             | 0.7 (0.4-1.4)       |
| Suriname                         | Gonorrhoea and chlamydia       |               |                  | 6 (2-12)              | 1 (0.4-2)              |             |                | 1 (0-1)             | 0.1 (0-0.2)         |
| Suriname                         | Intra-abdominal infections     | 82 (53-120)   | 14.3 (9.2-21)    | 2,100 (1,280-3,170)   | 352.1 (216.9-529.9)    | 21 (13-31)  | 3.6 (2.3-5.3)  | 532 (324-821)       | 89.3 (54.7-137.3)   |
| Suriname                         | LRI and thorax infections      | 111 (75-159)  | 21 (14.3-29.9)   | 3,690 (2,430-5,310)   | 732 (477.7-1064)       | 29 (19-42)  | 5.4 (3.5-7.9)  | 917 (587-1,350)     | 180.8 (115-264)     |
| Suriname                         | TB                             | 0 (0-0)       | 0 (0-0.1)        | 6 (2-17)              | 1 (0.3-2.9)            | 0 (0-0)     | 0 (0-0)        | 2 (0-9)             | 0.4 (0-1.5)         |
| Suriname                         | Typhoid, paratyphoid, and iNTS | 0 (0-0)       | 0 (0-0)          | 2 (1-5)               | 0.4 (0.2-0.9)          | 0 (0-0)     | 0 (0-0)        | 0 (0-1)             | 0.1 (0-0.2)         |

|                     |                                |                 |                  |                        |                        |               |                 |                     |                     |
|---------------------|--------------------------------|-----------------|------------------|------------------------|------------------------|---------------|-----------------|---------------------|---------------------|
| Suriname            | UTI                            | 39 (26-53)      | 7 (4.8-9.5)      | 836 (568-1,150)        | 144.4 (98-197.5)       | 9 (6-13)      | 1.7 (1.1-2.4)   | 201 (133-282)       | 34.6 (23.1-48.5)    |
| The Bahamas         | All                            | 217 (149-309)   | 62.6 (43.7-88.3) | 5,830 (3,920-8,470)    | 1637.9 (1121.7-2349.3) | 52 (34-75)    | 14.9 (10-21.4)  | 1,390 (910-2,070)   | 388.1 (256.9-575.6) |
| The Bahamas         | Bacterial skin infections      | 13 (8-22)       | 3.8 (2.3-6.5)    | 280 (164-475)          | 75 (44.3-125.9)        | 3 (1-5)       | 0.8 (0.4-1.5)   | 60 (33-103)         | 16.1 (8.9-28)       |
| The Bahamas         | Bone and joint infections      | 1 (0-2)         | 0.2 (0.1-0.6)    | 21 (6-51)              | 5.5 (1.5-13)           | 0 (0-0)       | 0.1 (0-0.1)     | 5 (1-12)            | 1.2 (0.3-3)         |
| The Bahamas         | BSI                            | 64 (35-106)     | 18.5 (10.1-30.5) | 1,880 (1,070-3,100)    | 553.4 (324.1-878.5)    | 16 (8-26)     | 4.5 (2.4-7.4)   | 452 (256-751)       | 133 (77.8-214.8)    |
| The Bahamas         | Cardiac infections             | 4 (3-6)         | 1.1 (0.9-1.5)    | 139 (101-186)          | 34.1 (25-45.5)         | 1 (1-1)       | 0.3 (0.2-0.4)   | 33 (24-46)          | 8.2 (5.9-11.2)      |
| The Bahamas         | CNS infections                 | 2 (1-3)         | 0.5 (0.3-0.9)    | 82 (50-142)            | 24.4 (14.7-41.8)       | 0 (0-1)       | 0.1 (0.1-0.2)   | 18 (11-32)          | 5.3 (3.2-9.4)       |
| The Bahamas         | Diarrhoea                      | 0 (0-0)         | 0 (0-0)          | 4 (2-7)                | 1.4 (0.7-2.5)          | 0 (0-0)       | 0 (0-0)         | 1 (0-1)             | 0.3 (0.1-0.4)       |
| The Bahamas         | Gonorrhoea and chlamydia       |                 |                  | 3 (1-6)                | 0.8 (0.3-1.6)          |               |                 | 0 (0-1)             | 0.1 (0-0.2)         |
| The Bahamas         | Intra-abdominal infections     | 39 (24-59)      | 10.4 (6.5-15.7)  | 1,060 (636-1,660)      | 263.7 (159.4-410.8)    | 9 (6-15)      | 2.5 (1.5-3.9)   | 259 (151-416)       | 64.1 (37.8-102.3)   |
| The Bahamas         | LRI and thorax infections      | 72 (52-101)     | 21.7 (15.9-29.9) | 1,860 (1,310-2,640)    | 548 (395.9-761.1)      | 17 (12-25)    | 5.1 (3.6-7.3)   | 435 (293-633)       | 127.7 (86.8-182.9)  |
| The Bahamas         | TB                             | 1 (0-2)         | 0.2 (0.1-0.4)    | 34 (15-66)             | 8.3 (3.7-16.1)         | 0 (0-1)       | 0.1 (0-0.2)     | 12 (3-32)           | 2.9 (0.8-7.6)       |
| The Bahamas         | Typhoid, paratyphoid, and iNTS | 0 (0-0)         | 0 (0-0)          | 0 (0-0)                | 0 (0-0.1)              | 0 (0-0)       | 0 (0-0)         | 0 (0-0)             | 0 (0-0)             |
| The Bahamas         | UTI                            | 21 (15-29)      | 6.1 (4.5-8.4)    | 468 (335-666)          | 123.3 (89.1-175.5)     | 5 (4-7)       | 1.4 (1-2)       | 111 (78-163)        | 29.3 (20.8-42.5)    |
| Trinidad and Tobago | All                            | 911 (558-1,400) | 54.4 (33.3-83.6) | 22,200 (13,200-35,100) | 1492.5 (887.4-2360.9)  | 232 (138-363) | 13.8 (8.3-21.6) | 5,620 (3,260-8,940) | 376.3 (219.8-592.7) |
| Trinidad and Tobago | Bacterial skin infections      | 51 (23-99)      | 2.9 (1.3-5.6)    | 1,040 (451-2,020)      | 59.3 (26.5-114.5)      | 12 (5-24)     | 0.7 (0.3-1.4)   | 242 (99-497)        | 13.8 (5.8-28)       |
| Trinidad and Tobago | Bone and joint infections      | 4 (1-10)        | 0.2 (0.1-0.5)    | 85 (21-217)            | 5 (1.3-12.5)           | 1 (0-3)       | 0.1 (0-0.1)     | 22 (6-60)           | 1.3 (0.3-3.4)       |



|                     |                                |                           |                  |                                 |                      |                        |               |                             |                    |
|---------------------|--------------------------------|---------------------------|------------------|---------------------------------|----------------------|------------------------|---------------|-----------------------------|--------------------|
| Trinidad and Tobago | BSI                            | 328 (160-563)             | 19.8 (9.8-33.6)  | 8,430 (4,350-14,300)            | 594.9 (316.3-978.7)  | 84 (41-146)            | 5 (2.5-8.7)   | 2,140 (1,090-3,670)         | 150.6 (79.9-248.5) |
| Trinidad and Tobago | Cardiac infections             | 14 (8-20)                 | 0.8 (0.5-1.2)    | 347 (211-522)                   | 21 (12.9-31.7)       | 4 (2-5)                | 0.2 (0.1-0.3) | 88 (52-134)                 | 5.3 (3.1-8.1)      |
| Trinidad and Tobago | CNS infections                 | 6 (4-10)                  | 0.4 (0.2-0.6)    | 232 (143-392)                   | 17.5 (10.7-29.2)     | 1 (1-2)                | 0.1 (0.1-0.2) | 55 (32-92)                  | 4.1 (2.4-7)        |
| Trinidad and Tobago | Diarrhoea                      | 0 (0-0)                   | 0 (0-0)          | 16 (8-29)                       | 1.3 (0.7-2.4)        | 0 (0-0)                | 0 (0-0)       | 3 (1-5)                     | 0.3 (0.1-0.5)      |
| Trinidad and Tobago | Gonorrhoea and chlamydia       |                           |                  | 10 (4-20)                       | 0.8 (0.3-1.6)        |                        |               | 1 (0-2)                     | 0.1 (0-0.2)        |
| Trinidad and Tobago | Intra-abdominal infections     | 157 (92-255)              | 8.8 (5.2-14.4)   | 3,770 (2,140-6,240)             | 217.8 (121.8-363.9)  | 40 (23-66)             | 2.3 (1.3-3.7) | 968 (536-1,630)             | 56 (31-94.7)       |
| Trinidad and Tobago | LRI and thorax infections      | 270 (170-409)             | 16.7 (10.6-25.2) | 6,530 (4,030-9,960)             | 479 (295.3-729.1)    | 70 (42-109)            | 4.3 (2.6-6.7) | 1,670 (989-2,620)           | 121.1 (72.6-186.8) |
| Trinidad and Tobago | TB                             | 0 (0-1)                   | 0 (0-0.1)        | 14 (5-42)                       | 0.8 (0.3-2.5)        | 0 (0-1)                | 0 (0-0)       | 5 (1-21)                    | 0.3 (0-1.2)        |
| Trinidad and Tobago | Typhoid, paratyphoid, and iNTS | 0 (0-0)                   | 0 (0-0)          | 0 (0-0)                         | 0 (0-0)              | 0 (0-0)                | 0 (0-0)       | 0 (0-0)                     | 0 (0-0)            |
| Trinidad and Tobago | UTI                            | 82 (49-127)               | 4.7 (2.8-7.2)    | 1,680 (992-2,640)               | 95.1 (56.4-150.1)    | 20 (12-32)             | 1.1 (0.7-1.8) | 414 (240-657)               | 23.4 (13.6-36.8)   |
| United States       | All                            | 173,000 (120,000-243,000) | 30.7 (21-43.4)   | 3,390,000 (2,260,000-4,860,000) | 721.4 (474.3-1045.9) | 41,900 (28,300-59,600) | 7.4 (5-10.7)  | 821,000 (535,000-1,190,000) | 174.1 (111.7-257)  |
| United States       | Bacterial skin infections      | 5,730 (2,700-11,300)      | 1 (0.5-2)        | 108,000 (51,600-212,000)        | 22 (10.5-43.1)       | 1,100 (467-2,290)      | 0.2 (0.1-0.4) | 20,700 (8,970-43,000)       | 4.2 (1.9-8.7)      |
| United States       | Bone and joint infections      | 762 (250-1,750)           | 0.1 (0-0.3)      | 15,600 (4,850-36,000)           | 3.2 (0.9-7.4)        | 162 (49-377)           | 0 (0-0.1)     | 3,280 (977-7,900)           | 0.7 (0.2-1.6)      |
| United States       | BSI                            | 60,800 (32,500-102,000)   | 11.2 (6.1-18.7)  | 1,300,000 (712,000-2,140,000)   | 290.6 (158.8-470.5)  | 15,000 (7,710-25,200)  | 2.8 (1.4-4.6) | 319,000 (171,000-522,000)   | 70.7 (38.2-116)    |
| United States       | Cardiac infections             | 6,650 (4,130-8,890)       | 1.2 (0.7-1.5)    | 123,000 (79,600-166,000)        | 25.5 (16.6-34.9)     | 1,640 (1,000-2,260)    | 0.3 (0.2-0.4) | 29,800 (18,800-41,200)      | 6.2 (3.9-8.6)      |

|               |                                |                        |                  |                             |                     |                       |                 |                           |                     |
|---------------|--------------------------------|------------------------|------------------|-----------------------------|---------------------|-----------------------|-----------------|---------------------------|---------------------|
| United States | CNS infections                 | 536 (344-953)          | 0.1 (0.1-0.2)    | 18,700 (12,200-32,000)      | 5.7 (3.8-9.2)       | 111 (67-205)          | 0 (0-0)         | 3,830 (2,360-6,780)       | 1.2 (0.7-1.9)       |
| United States | Diarrhoea                      | 142 (77-237)           | 0 (0-0)          | 4,740 (2,480-8,150)         | 1.3 (0.7-2.3)       | 31 (15-54)            | 0 (0-0)         | 856 (418-1,500)           | 0.2 (0.1-0.4)       |
| United States | Gonorrhoea and chlamydia       |                        |                  | 230 (134-361)               | 0.1 (0-0.1)         |                       |                 | 24 (7-49)                 | 0 (0-0)             |
| United States | Intra-abdominal infections     | 35,600 (23,000-51,700) | 6.5 (4.2-9.6)    | 781,000 (499,000-1,150,000) | 163.5 (102.7-243.2) | 9,080 (5,820-13,100)  | 1.7 (1.1-2.4)   | 199,000 (126,000-290,000) | 41.7 (25.7-61.5)    |
| United States | LRI and thorax infections      | 46,500 (35,100-62,300) | 7.9 (5.9-10.6)   | 788,000 (573,000-1,100,000) | 163.5 (119-227.9)   | 11,000 (7,610-15,500) | 1.9 (1.3-2.7)   | 186,000 (125,000-269,000) | 38.4 (26.2-55.8)    |
| United States | TB                             | 129 (91-184)           | 0 (0-0)          | 3,190 (2,340-4,490)         | 0.7 (0.5-1)         | 36 (1-86)             | 0 (0-0)         | 782 (33-1,870)            | 0.2 (0-0.4)         |
| United States | Typhoid, paratyphoid, and iNTS | 2 (1-2)                | 0 (0-0)          | 53 (35-65)                  | 0 (0-0)             | 0 (0-1)               | 0 (0-0)         | 10 (2-18)                 | 0 (0-0)             |
| United States | UTI                            | 16,000 (12,600-21,000) | 2.6 (2-3.4)      | 243,000 (185,000-334,000)   | 45.5 (34-63.3)      | 3,790 (2,890-5,090)   | 0.6 (0.5-0.8)   | 57,900 (42,300-81,900)    | 10.8 (7.8-15.5)     |
| Uruguay       | All Bacterial                  | 2,790 (2,050-3,750)    | 47.4 (34.4-63.9) | 48,100 (34,100-65,800)      | 1023.2 (714-1415.9) | 692 (496-952)         | 11.8 (8.4-16.3) | 11,900 (8,320-16,800)     | 254.2 (172.7-361.9) |
| Uruguay       | skin infections                | 92 (52-161)            | 1.5 (0.8-2.6)    | 1,360 (743-2,460)           | 25.4 (13.9-47.2)    | 21 (11-39)            | 0.3 (0.2-0.6)   | 305 (155-571)             | 5.7 (2.9-10.8)      |
| Uruguay       | Bone and joint infections      | 6 (2-15)               | 0.1 (0-0.3)      | 108 (31-260)                | 2.2 (0.6-5.2)       | 1 (0-3)               | 0 (0-0.1)       | 25 (7-59)                 | 0.5 (0.1-1.2)       |
| Uruguay       | BSI                            | 735 (389-1,240)        | 13.4 (7.3-22.6)  | 15,100 (8,290-24,600)       | 353.4 (199.4-557.2) | 187 (98-318)          | 3.4 (1.8-5.7)   | 3,810 (2,060-6,330)       | 89.5 (49.2-144)     |
| Uruguay       | Cardiac infections             | 115 (76-149)           | 1.9 (1.3-2.5)    | 1,940 (1,350-2,470)         | 37.8 (26.8-48.1)    | 29 (19-39)            | 0.5 (0.3-0.6)   | 491 (335-642)             | 9.5 (6.6-12.3)      |
| Uruguay       | CNS infections                 | 8 (5-14)               | 0.2 (0.1-0.3)    | 231 (137-438)               | 6.3 (3.6-12)        | 2 (1-3)               | 0 (0-0.1)       | 54 (30-104)               | 1.5 (0.8-2.8)       |
| Uruguay       | Diarrhoea                      | 1 (1-2)                | 0 (0-0)          | 55 (31-88)                  | 1.7 (0.9-2.7)       | 0 (0-1)               | 0 (0-0)         | 11 (6-18)                 | 0.3 (0.2-0.6)       |
| Uruguay       | Gonorrhoea and chlamydia       |                        |                  | 16 (8-28)                   | 0.5 (0.3-0.8)       |                       |                 | 2 (0-3)                   | 0 (0-0.1)           |
| Uruguay       | Intra-abdominal infections     | 548 (375-767)          | 9.4 (6.4-13.2)   | 9,560 (6,420-13,700)        | 189.4 (124.6-273.9) | 137 (94-194)          | 2.3 (1.6-3.3)   | 2,390 (1,600-3,440)       | 47.2 (31.2-69.2)    |
| Uruguay       | LRI and thorax infections      | 869 (676-1,130)        | 14.4 (11.1-19.1) | 14,100 (10,500-19,100)      | 305.3 (223.7-413.5) | 215 (157-292)         | 3.6 (2.6-4.9)   | 3,500 (2,480-4,870)       | 75.4 (52.8-106.4)   |

|           |                                |                       |                  |                           |                       |                     |                 |                         |                    |
|-----------|--------------------------------|-----------------------|------------------|---------------------------|-----------------------|---------------------|-----------------|-------------------------|--------------------|
| Uruguay   | TB                             | 1 (1-2)               | 0 (0-0)          | 33 (19-63)                | 0.8 (0.4-1.5)         | 0 (0-1)             | 0 (0-0)         | 11 (2-31)               | 0.2 (0-0.7)        |
| Uruguay   | Typhoid, paratyphoid, and iNTS | 0 (0-0)               | 0 (0-0)          | 0 (0-0)                   | 0 (0-0)               | 0 (0-0)             | 0 (0-0)         | 0 (0-0)                 | 0 (0-0)            |
| Uruguay   | UTI                            | 417 (290-526)         | 6.4 (4.5-8.2)    | 5,610 (3,980-7,290)       | 100.4 (73.1-132.2)    | 100 (70-130)        | 1.6 (1.1-2)     | 1,350 (955-1,810)       | 24.2 (17-33.1)     |
| Venezuela | All                            | 12,000 (7,460-18,300) | 43.8 (27.5-66.4) | 358,000 (221,000-550,000) | 1324.2 (822.5-2018.8) | 3,050 (1,870-4,700) | 11.1 (6.9-17.1) | 89,900 (55,100-138,000) | 331.5 (204-507)    |
| Venezuela | Bacterial skin infections      | 294 (70-728)          | 1.1 (0.3-2.6)    | 6,750 (1,840-16,000)      | 23.5 (6.4-56.2)       | 69 (16-174)         | 0.2 (0.1-0.6)   | 1,570 (407-3,780)       | 5.4 (1.4-13.2)     |
| Venezuela | Bone and joint infections      | 41 (11-100)           | 0.1 (0-0.4)      | 1,060 (282-2,680)         | 3.6 (1-9.1)           | 10 (3-26)           | 0 (0-0.1)       | 272 (70-709)            | 0.9 (0.2-2.4)      |
| Venezuela | BSI                            | 4,470 (2,240-7,530)   | 16.4 (8.3-27.5)  | 140,000 (76,300-226,000)  | 524.4 (290.6-839.2)   | 1,180 (604-2,020)   | 4.3 (2.2-7.4)   | 36,600 (20,100-60,500)  | 136.9 (77-222.6)   |
| Venezuela | Cardiac infections             | 123 (73-191)          | 0.4 (0.3-0.7)    | 3,310 (1,990-5,050)       | 11.4 (6.9-17.4)       | 32 (19-51)          | 0.1 (0.1-0.2)   | 872 (521-1,360)         | 3 (1.8-4.7)        |
| Venezuela | CNS infections                 | 111 (68-185)          | 0.4 (0.2-0.7)    | 5,870 (3,650-9,450)       | 22.2 (13.8-35.4)      | 26 (16-44)          | 0.1 (0.1-0.2)   | 1,360 (829-2,200)       | 5.1 (3.2-8.2)      |
| Venezuela | Diarrhoea                      | 39 (20-70)            | 0.2 (0.1-0.3)    | 2,460 (1,260-4,370)       | 10 (5.1-17.9)         | 9 (3-18)            | 0 (0-0.1)       | 482 (177-1,030)         | 2 (0.7-4.2)        |
| Venezuela | Gonorrhoea and chlamydia       |                       |                  | 115 (50-240)              | 0.4 (0.2-0.9)         |                     |                 | 11 (2-26)               | 0 (0-0.1)          |
| Venezuela | Intra-abdominal infections     | 2,530 (1,520-3,920)   | 8.9 (5.4-13.8)   | 65,000 (37,700-103,000)   | 221.5 (129.6-353.4)   | 640 (380-1,040)     | 2.3 (1.4-3.7)   | 16,500 (9,400-27,300)   | 56.2 (32.1-93.2)   |
| Venezuela | LRI and thorax infections      | 3,440 (2,300-5,050)   | 12.8 (8.6-18.8)  | 112,000 (74,400-166,000)  | 431.8 (285-634.9)     | 841 (534-1,260)     | 3.1 (2-4.7)     | 26,600 (16,800-40,000)  | 102.2 (64.9-153.1) |
| Venezuela | TB                             | 74 (32-168)           | 0.3 (0.1-0.6)    | 2,430 (1,060-5,460)       | 8.3 (3.7-18.8)        | 30 (5-97)           | 0.1 (0-0.3)     | 885 (161-2,870)         | 3 (0.6-9.8)        |
| Venezuela | Typhoid, paratyphoid, and iNTS | 1 (0-2)               | 0 (0-0)          | 14 (1-42)                 | 0 (0-0.1)             | 0 (0-0)             | 0 (0-0)         | 3 (0-9)                 | 0 (0-0)            |
| Venezuela | UTI                            | 871 (507-1,410)       | 3.2 (1.9-5.1)    | 19,100 (10,800-31,200)    | 66.9 (38.4-109.1)     | 216 (123-354)       | 0.8 (0.4-1.3)   | 4,740 (2,640-7,890)     | 16.6 (9.3-27.5)    |

Abbreviations: BSI = Bloodstream Infection, CNS = Central Nervous System, DALYs = Disability Adjusted Life Years, iNTS = invasive Non-typhoidal Salmonella, LRI = Lower Respiratory Infection, TB = tuberculosis, UTI = Urinary Tract Infection, WHO = World Health Organization
